# Supplementary material for: Proteome-wide identification of HSP70/HSC70 chaperone clients in human cells
Source: PubMed Central journal article supplement (PMC7392334; doi:10.1371/journal.pbio.3000606), 2020-07-20
Supplement: pbio.3000606.s002.pdf [file pbio.3000606.s002.pdf]

*Δssa1-4*

+ vector

+ SSA1  
UBAIT ΔGG

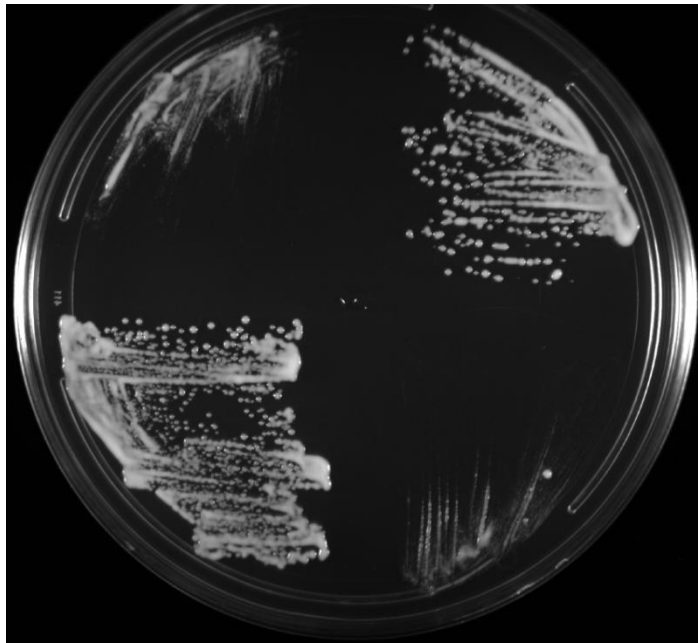

+ wild-type  
SSA1

+ SSA1  
UBAIT
