# Supplementary material for: Proteome-wide identification of HSP70/HSC70 chaperone clients in human cells
Source: PubMed Central journal article supplement (PMC7392334; doi:10.1371/journal.pbio.3000606), 2020-07-20

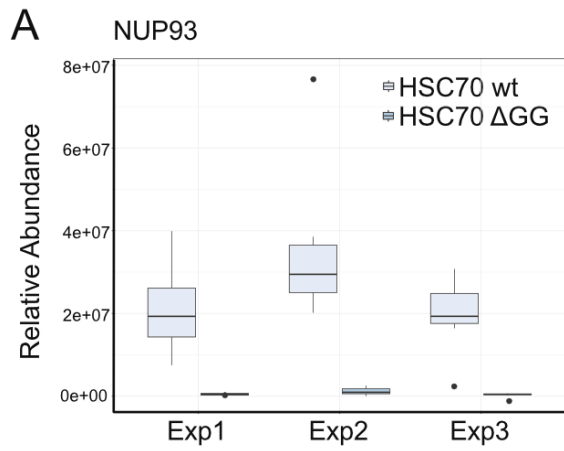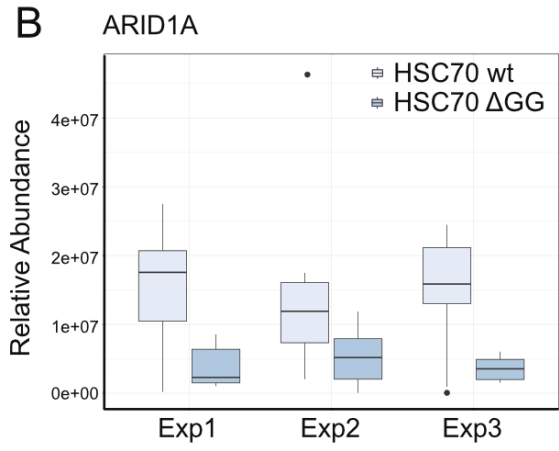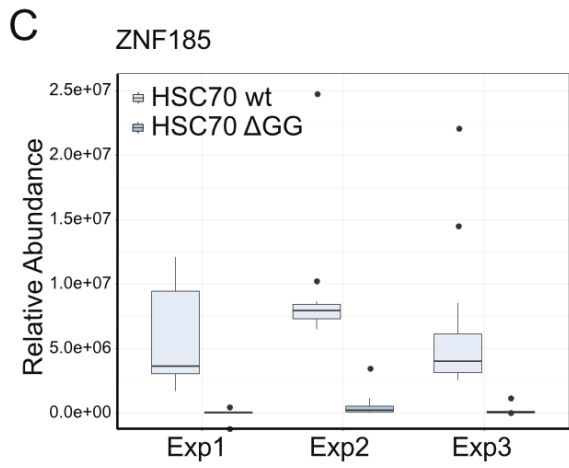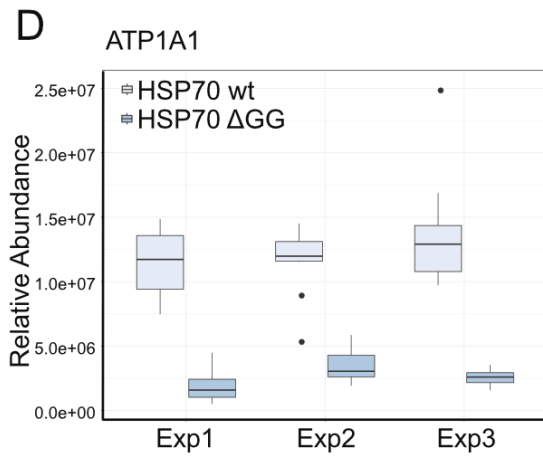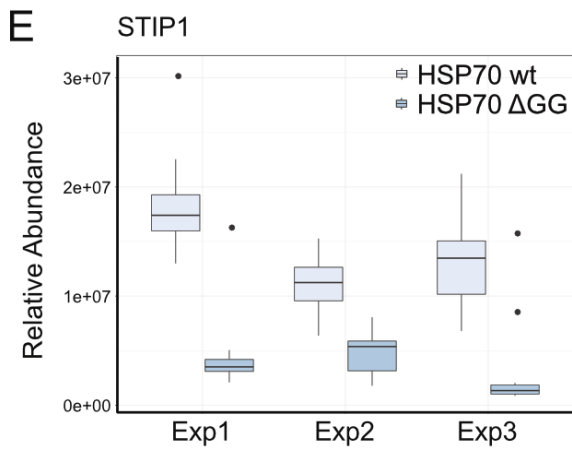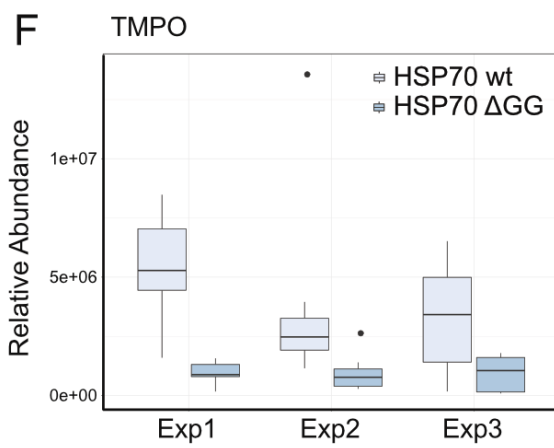

Supplement: pbio.3000606.s003.pdf [file pbio.3000606.s003.pdf]
