# Supplementary material for: Proteome-wide identification of HSP70/HSC70 chaperone clients in human cells
Source: PubMed Central journal article supplement (PMC7392334; doi:10.1371/journal.pbio.3000606), 2020-07-20
Supplement: pbio.3000606.s006.pdf [file pbio.3000606.s006.pdf]

A

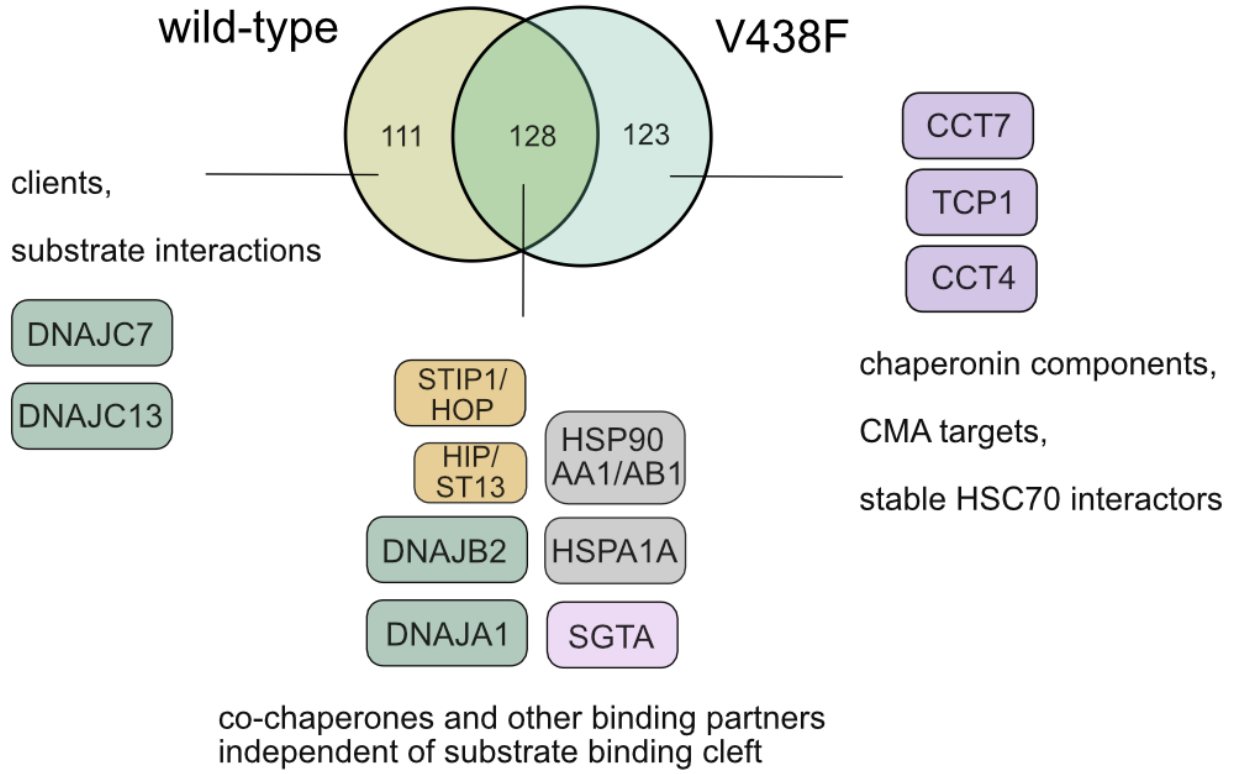

B

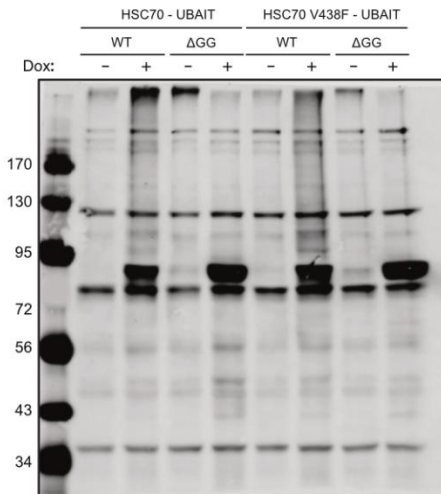

C

|                                  | HSC70    |          |          |
|----------------------------------|----------|----------|----------|
|                                  | WT       | V438F    | P-Value  |
| Waltz                            | 1262.316 | 1088.312 | 0.06301  |
| Tango                            | 2546.139 | 1998.162 | 0.02512  |
| AA Length                        | 755.5443 | 612.3238 | 0.0179   |
| HSC70 (Excluding shared targets) |          |          |          |
|                                  | WT       | V438F    | P-Value  |
| Waltz                            | 1372.625 | 1003.146 | 0.01523  |
| Tango                            | 2852.515 | 1691.395 | 0.001672 |
| AA Length                        | 742.4455 | 444.547  | 1.44E-05 |
