# Supplementary material for: Proteome-wide identification of HSP70/HSC70 chaperone clients in human cells
Source: PLoS Biol. 2020 Jul 20;18(7):e3000606. doi: 10.1371/journal.pbio.3000606 (PMC7392334; doi:10.1371/journal.pbio.3000606)
Supplement: S2 Data — HSC, heat shock cognate; UBAIT, ubiquitin-activated interaction trap. (XLSX) [file pbio.3000606.s009.xlsx]

## Sheet: summary
UNIPROT accession numbers and descriptions are shown for HSC70 UBAIT , WT and V438F (each with 6 wt and 12 ΔGG samples).
For each experiment, an enrichment score is shown, based on label-free quantification of bound targets by mass spectrometry and normalization with level of chaperone recovered. Percentile score is calculated based on a boot-strapping method (see Experimental procedures) and is compared with 95 percentile value to determine significance and is then filtered using the Benjamini-Hochberg procedure f…

## Sheet: WT and V438F HSC70 UBAIT
Uniprot Accession	Description	WT HSC70 Enrichment	WT HSC70 Percentile	WT HSC70 95%	V438F HSC70 Enrichment	V438F HSC70 Percentile	V438F HSC70 95%	WT HSC70 B-H Corrected Q 0.05	V438F HSC70 B-H Corrected Q 0.05	WT Enrichment	V438F Enrichment
Q09666-1	Neuroblast differentiation-associated protein AHNAK [OS=Homo sapiens]	1.94189	1	1.44183	2.36407	1	1.54526	3.48918e-05	3.49162e-05	Enriched	Enriched
P11142-1	Heat shock cognate 71 kDa protein [OS=Homo sapiens]	1	1	1	1	1	1	6.97837e-05	6.98324e-05	Rejected	Rejected	Noramlized Bait Protein
P21333	Filamin-A [OS=Homo sapiens]	1.96157	1	1.34213	1.82344	1	1.35044	0.000104676	0.000104749	Enriched	Enriched
Q13085-4	Isoform 4 of Acetyl-CoA carboxylase 1 [OS=Homo sapiens]	3.09523	1	1.58989	2.70201	1	1.60368	0.000139567	0.000139665	Enriched	Enriched
P08238	Heat shock protein HSP 90-beta [OS=Homo sapiens]	5.59879	1	1.88091	6.99983	1	2.29908	0.000174459	0.000174581	Enriched	Enriched
P07900-2	Isoform 2 of Heat shock protein HSP 90-alpha [OS=Homo sapiens]	5.7969	1	2.07606	10.7526	1	2.33012	0.000209351	0.000209497	Enriched	Enriched
P49327	Fatty acid synthase [OS=Homo sapiens]	2.22597	1	1.53024	3.35991	1	1.87743	0.000244243	0.000244413	Enriched	Enriched
P11498	pyruvate carboxylase, mitochondrial [OS=Homo sapiens]	2.2638	1	1.59199	2.35053	1	1.37682	0.000279135	0.00027933	Enriched	Enriched
P05165-1	Propionyl-CoA carboxylase alpha chain, mitochondrial [OS=Homo sapiens]	1.85635	1	1.31533	1.73113	1	1.27409	0.000348918	0.000314246	Enriched	Enriched
P22314	Ubiquitin-like modifier-activating enzyme 1 [OS=Homo sapiens]	7.39863	1	2.29849	13.3593	1	2.84628	0.000453594	0.000349162	Enriched	Enriched
P0DMV8	heat shock 70 kDa protein 1A [OS=Homo sapiens]	15.4471	1	2.55146	7.87875	1	2.62701	0.000488486	0.000384078	Enriched	Enriched
P31948-2	Isoform 2 of Stress-induced-phosphoprotein 1 [OS=Homo sapiens]	6.56578	1	2.18753	7.48467	1	2.14919	0.000523378	0.000418994	Enriched	Enriched
P05783	Keratin, type I cytoskeletal 18 [OS=Homo sapiens]	1.38706	1	1.25641	1.76579	1	1.38479	0.000558269	0.000453911	Enriched	Enriched
P00338-3	Isoform 3 of L-lactate dehydrogenase A chain [OS=Homo sapiens]	2.43609	1	1.65577	2.85762	1	1.78064	0.000662945	0.000488827	Enriched	Enriched
P27816-1	Microtubule-associated protein 4 [OS=Homo sapiens]	1.90203	1	1.41005	2.21373	1	1.47758	0.000697837	0.000523743	Enriched	Enriched
Q96RQ3	Methylcrotonoyl-CoA carboxylase subunit alpha, mitochondrial [OS=Homo sapiens]	2.44927	1	1.43196	2.24345	1	1.49252	0.000872296	0.000558659	Enriched	Enriched
Q7Z6Z7	E3 ubiquitin-protein ligase HUWE1 [OS=Homo sapiens]	8.55216	1	2.66477	14.2499	1	4.74776	0.000907188	0.000593575	Enriched	Enriched
P31946	14-3-3 protein beta/alpha [OS=Homo sapiens]	4.41888	1	2.20426	5.59133	1	3.01667	0.00094208	0.000628492	Enriched	Enriched
P45974-1	Ubiquitin carboxyl-terminal hydrolase 5 [OS=Homo sapiens]	13.6596	1	2.0705	20.0197	1	3.41345	0.000976971	0.000663408	Enriched	Enriched
P05023	Sodium/potassium-transporting ATPase subunit alpha-1 [OS=Homo sapiens]	3.93783	1	1.90399	2.2714	1	1.48025	0.00104676	0.000698324	Enriched	Enriched
Q9ULH7-5	Isoform 5 of MKL/myocardin-like protein 2 [OS=Homo sapiens]	1.97666	1	1.32036	1.92123	1	1.39779	0.00111654	0.00073324	Enriched	Enriched
P30153	serine/threonine-protein phosphatase 2A 65 kDa regulatory subunit A alpha isoform [OS=Homo sapiens]	4.58766	1	2.1702	6.17184	1	2.8076	0.00115143	0.000768156	Enriched	Enriched
P52292	Importin subunit alpha-1 [OS=Homo sapiens]	5.59906	1	2.35615	15.4589	1	2.34004	0.00122121	0.000803073	Enriched	Enriched
P48681	Nestin [OS=Homo sapiens]	2.36584	1	1.67156	2.66934	1	1.71272	0.00125611	0.000837989	Enriched	Enriched
Q8IVF2-1	Protein AHNAK2 [OS=Homo sapiens]	2.05759	1	1.38057	2.40407	1	1.4639	0.001291	0.000872905	Enriched	Enriched
P00505	Aspartate aminotransferase, mitochondrial [OS=Homo sapiens]	3.61183	1	1.98179	2.58219	1	1.79828	0.00132589	0.000907821	Enriched	Enriched
Q15181	Inorganic pyrophosphatase [OS=Homo sapiens]	3.62314	1	1.90456	2.37692	1	1.62353	0.00143057	0.000942737	Enriched	Enriched
P62081	40S ribosomal protein S7 [OS=Homo sapiens]	7.00143	1	2.70952	17.546	1	3.08931	0.00146546	0.000977654	Enriched	Enriched
Q8NC51-1	Plasminogen activator inhibitor 1 RNA-binding protein [OS=Homo sapiens]	1.808	1	1.33455	1.77353	1	1.33439	0.00153524	0.00101257	Enriched	Enriched
Q14240-2	Isoform 2 of Eukaryotic initiation factor 4A-II [OS=Homo sapiens]	9.47075	1	3.39209	5.17415	1	2.53096	0.00163992	0.00104749	Enriched	Enriched
P50502	Hsc70-interacting protein [OS=Homo sapiens]	79.1332	1	2.09707	20.4562	1	2.86716	0.00167481	0.0010824	Enriched	Enriched
P35998	26S protease regulatory subunit 7 [OS=Homo sapiens]	4.67188	1	2.68082	7.09657	1	2.61324	0.00177948	0.00111732	Enriched	Enriched
Q12904-2	Isoform 2 of Aminoacyl tRNA synthase complex-interacting multifunctional protein 1 [OS=Homo sapiens]	2.08942	1	1.54735	2.47074	1	1.68349	0.00181438	0.00115223	Enriched	Enriched
P08243-1	Asparagine synthetase [glutamine-hydrolyzing] [OS=Homo sapiens]	14.4444	1	2.71665	8.10286	1	3.12749	0.00184927	0.00118715	Enriched	Enriched
A0AVT1-1	Ubiquitin-like modifier-activating enzyme 6 [OS=Homo sapiens]	17.365	1	2.46784	16.6376	1	2.76458	0.00191905	0.00122207	Enriched	Enriched
Q14247-1	Src substrate cortactin [OS=Homo sapiens]	1.87544	1	1.33246	1.8731	1	1.42417	0.00219819	0.00125698	Enriched	Enriched
P30154-2	Isoform 2 of Serine/threonine-protein phosphatase 2A 65 kDa regulatory subunit A beta isoform [OS=Homo sapiens]	16.4855	1	2.21883	10.2988	1	2.92545	0.00233775	0.0012919	Enriched	Enriched
O94842	TOX high mobility group box family member 4 [OS=Homo sapiens]	1.64373	1	1.33062	1.67341	1	1.39369	0.00237264	0.00132682	Enriched	Enriched
P51149	ras-related protein Rab-7a [OS=Homo sapiens]	10.9624	1	2.22184	33.6943	1	2.29587	0.00240754	0.00136173	Enriched	Enriched
P54727	UV excision repair protein RAD23 homolog B [OS=Homo sapiens]	22.1859	1	2.93737	25.4255	1	2.40692	0.0025471	0.00139665	Enriched	Enriched
Q99426	tubulin-folding cofactor B [OS=Homo sapiens]	14.8009	1	2.90355	30.8968	1	3.46532	0.002582	0.00143156	Enriched	Enriched
Q02952-1	A-kinase anchor protein 12 [OS=Homo sapiens]	2.47332	1	1.64195	2.0856	1	1.51728	0.00261689	0.00146648	Enriched	Enriched
P63000-2	Isoform B of Ras-related C3 botulinum toxin substrate 1 [OS=Homo sapiens]	3.74926	1	1.85798	5.74723	1	2.0143	0.00265178	0.0015014	Enriched	Enriched
P49023	Paxillin [OS=Homo sapiens]	2.7217	1	1.69375	1.93154	1	1.44082	0.00293091	0.00153631	Enriched	Enriched
Q3ZCQ8-2	Isoform 2 of Mitochondrial import inner membrane translocase subunit TIM50 [OS=Homo sapiens]	3.8159	1	2.23333	2.4333	1	1.57908	0.00310537	0.00157123	Enriched	Enriched
Q16850-1	lanosterol 14-alpha demethylase [OS=Homo sapiens]	3.41116	1	1.78594	2.95745	1	1.68181	0.00317516	0.00160615	Enriched	Enriched
Q01650	large neutral amino acids transporter small subunit 1 [OS=Homo sapiens]	9.62938	1	2.50977	28.4607	1	2.81372	0.00324494	0.00164106	Enriched	Enriched
P16949-1	Stathmin [OS=Homo sapiens]	38.582	1	3.24315	7.38814	1	2.80355	0.00327983	0.00167598	Enriched	Enriched
Q99755	Phosphatidylinositol 4-phosphate 5-kinase type-1 alpha [OS=Homo sapiens]	2.25665	1	1.51136	1.96659	1	1.4511	0.00345429	0.00171089	Enriched	Enriched
Q9Y4C2-1	TRPM8 channel-associated factor 1 [OS=Homo sapiens]	26.8676	1	2.41277	18.8749	1	2.50025	0.00352408	0.00174581	Enriched	Enriched
O14828	Secretory carrier-associated membrane protein 3 [OS=Homo sapiens]	5.36025	1	2.6486	6.54918	1	3.29357	0.00355897	0.00178073	Enriched	Enriched
P25686-3	DnaJ homolog subfamily B member 2 [OS=Homo sapiens]	4.583	1	2.41419	25.3112	1	2.9825	0.00362875	0.00181564	Enriched	Enriched
Q9H832	Ubiquitin-conjugating enzyme E2 Z [OS=Homo sapiens]	40.0375	1	2.63107	29.2771	1	2.51834	0.00369853	0.00185056	Enriched	Enriched
Q8N0X7	Spartin [OS=Homo sapiens]	8.96886	1	2.72404	7.85463	1	2.77217	0.0038381	0.00188547	Enriched	Enriched
Q7Z569	BRCA1-associated protein [OS=Homo sapiens]	19.9047	1	2.64401	3.85513	1	2.41852	0.00390789	0.00192039	Enriched	Enriched
Q96J02	E3 ubiquitin-protein ligase Itchy homolog [OS=Homo sapiens]	13.2455	1	3.11495	8.87175	1	2.82193	0.00394278	0.00195531	Enriched	Enriched
P27144	Adenylate kinase 4, mitochondrial [OS=Homo sapiens]	9.6978	1	2.72556	6.84376	1	2.71807	0.00401256	0.00199022	Enriched	Enriched
Q8IVM0-2	Isoform 2 of Coiled-coil domain-containing protein 50 [OS=Homo sapiens]	14.7309	1	2.50099	14.0393	1	2.24954	0.00404745	0.00202514	Enriched	Enriched
Q9P0K7-2	Isoform 2 of Ankycorbin [OS=Homo sapiens]	3.58005	1	1.78172	4.84373	1	2.27279	0.00408234	0.00206006	Enriched	Enriched
Q969T9	WW domain-binding protein 2 [OS=Homo sapiens]	28.3687	1	2.93603	27.8312	1	2.1388	0.00411724	0.00209497	Enriched	Enriched
O95372	acyl-protein thioesterase 2 [OS=Homo sapiens]	2.81605	1	1.71517	2.03393	1	1.46235	0.00432659	0.00212989	Enriched	Enriched
P04075-2	Isoform 2 of Fructose-bisphosphate aldolase A [OS=Homo sapiens]	3.11552	0.999	2.03922	2.95776	1	1.56761	0.00443126	0.0021648	Enriched	Enriched
O75663	TIP41-like protein [OS=Homo sapiens]	1.62012	0.999	1.3192	1.48585	1	1.29399	0.00474529	0.00219972	Enriched	Enriched
P13639	Elongation factor 2 [OS=Homo sapiens]	3.6818	0.998	2.25672	7.29344	1	3.62678	0.00509421	0.00223464	Enriched	Enriched
P60953	Cell division control protein 42 homolog [OS=Homo sapiens]	2.82003	0.998	1.87269	4.49125	1	2.11243	0.00537334	0.00226955	Enriched	Enriched
O43809	Cleavage and polyadenylation specificity factor subunit 5 [OS=Homo sapiens]	4.18829	0.998	2.68967	3.39124	1	1.76195	0.00544313	0.00230447	Enriched	Enriched
Q15907	Ras-related protein Rab-11B [OS=Homo sapiens]	4.53055	0.998	2.34325	4.15028	1	2.14642	0.00547802	0.00233939	Enriched	Enriched
Q6FI81-1	Anamorsin [OS=Homo sapiens]	2.39165	0.998	1.70784	3.3671	1	1.91437	0.0055478	0.0023743	Enriched	Enriched
Q9Y2J2-2	Isoform 2 of Band 4.1-like protein 3 [OS=Homo sapiens]	2.15046	0.997	1.63612	2.512	1	1.8762	0.00572226	0.00240922	Enriched	Enriched
Q5JWF2-1	Guanine nucleotide-binding protein G(S) subunit alpha isoforms XLas [OS=Homo sapiens]	9.31791	0.997	3.5157	9.79116	1	2.72095	0.0060014	0.00244413	Enriched	Enriched
Q9NZC7	WW domain-containing oxidoreductase [OS=Homo sapiens]	1.62824	0.997	1.34457	1.59722	1	1.29292	0.00617585	0.00247905	Enriched	Enriched
Q9H307	Pinin [OS=Homo sapiens]	1.68324	0.997	1.40583	1.86811	1	1.44823	0.00624564	0.00251397	Enriched	Enriched
Q9Y490	Talin-1 [OS=Homo sapiens]	2.34502	0.996	1.81445	2.15386	1	1.52615	0.00635031	0.00254888	Enriched	Enriched
P22234	multifunctional protein ADE2 [OS=Homo sapiens]	2.35251	0.996	1.80778	4.18245	1	2.14109	0.00645499	0.0025838	Enriched	Enriched
Q9Y265	RuvB-like 1 [OS=Homo sapiens]	1.49374	0.996	1.33087	1.67674	1	1.32753	0.00648988	0.00261872	Enriched	Enriched
P82650	28S ribosomal protein S22, mitochondrial [OS=Homo sapiens]	7.71451	0.996	3.56323	18.6703	1	3.53709	0.00687369	0.00265363	Enriched	Enriched
Q9UNF1	Melanoma-associated antigen D2 [OS=Homo sapiens]	2.74704	0.995	1.9233	7.32939	1	3.70032	0.00697837	0.00268855	Enriched	Enriched
P26006	Integrin alpha-3 [OS=Homo sapiens]	3.87246	0.995	2.30441	6.89972	1	2.35266	0.0072575	0.00272346	Enriched	Enriched
P07195	L-lactate dehydrogenase B chain [OS=Homo sapiens]	2.24035	0.994	1.66091	3.66874	1	1.69398	0.00753664	0.00275838	Enriched	Enriched
P46060	Ran GTPase-activating protein 1 [OS=Homo sapiens]	1.43605	0.994	1.29421	2.46697	1	1.74001	0.00764131	0.0027933	Enriched	Enriched
P07355-2	Isoform 2 of Annexin A2 [OS=Homo sapiens]	2.09692	0.992	1.59426	3.20772	1	1.68622	0.00806001	0.00282821	Enriched	Enriched
Q6FI13	Histone H2A type 2-A [OS=Homo sapiens]	2.01959	0.992	1.67715	10.9152	1	2.26877	0.00816469	0.00286313	Enriched	Enriched
Q15942	Zyxin [OS=Homo sapiens]	2.36051	0.991	1.89009	2.97539	1	1.89352	0.00847872	0.00289804	Rejected	Enriched
P11476-1	Ras-related protein Rab-1A [OS=Homo sapiens]	2.21689	0.99	1.85839	3.35574	1	2.46173	0.00879274	0.00293296	Rejected	Enriched
P31947-1	14-3-3 protein sigma [OS=Homo sapiens]	1.84127	0.989	1.51465	2.47004	1	1.60404	0.00900209	0.00296788	Rejected	Enriched
P11940-1	Polyadenylate-binding protein 1 [OS=Homo sapiens]	2.43645	0.989	2.01616	13.406	1	2.46483	0.00903699	0.00300279	Rejected	Enriched
O60664-1	Perilipin-3 [OS=Homo sapiens]	1.91136	0.989	1.6702	2.95688	1	1.70139	0.00907188	0.00303771	Rejected	Enriched
Q99832	T-complex protein 1 subunit eta [OS=Homo sapiens]	1.8135	0.988	1.59142	7.49455	1	2.15299	0.0094208	0.00307263	Rejected	Enriched
Q9NSE4	Isoleucine--tRNA ligase, mitochondrial [OS=Homo sapiens]	153.081	0.988	3.66665	205.922	1	3.87463	0.00956036	0.00310754	Rejected	Enriched
P06744	glucose-6-phosphate isomerase [OS=Homo sapiens]	3.19507	0.986	2.43051	6.4543	1	2.91759	0.0100488	0.00314246	Rejected	Enriched
P29692-2	Isoform 2 of Elongation factor 1-delta [OS=Homo sapiens]	1.83381	0.986	1.50523	2.22473	1	1.58855	0.0101186	0.00317737	Rejected	Enriched
Q13033	Striatin-3 [OS=Homo sapiens]	7.48297	0.986	3.05044	8.3085	1	2.56688	0.010328	0.00321229	Rejected	Enriched
Q9HB71	Calcyclin-binding protein [OS=Homo sapiens]	3.31052	0.984	2.52526	5.57554	1	3.35548	0.0108514	0.00324721	Rejected	Enriched
P61026	ras-related protein rab-10 [OS=Homo sapiens]	2.05298	0.984	1.75962	2.59695	1	2.05616	0.0108863	0.00328212	Rejected	Enriched
P08865	40S ribosomal protein SA [OS=Homo sapiens]	2.74415	0.982	2.29026	6.26914	1	2.3609	0.0112003	0.00331704	Rejected	Enriched
P68104	Elongation factor 1-alpha 1 [OS=Homo sapiens]	1.91479	0.981	1.62786	3.60432	1	1.89965	0.0112701	0.00335196	Rejected	Enriched
P43487	Ran-specific GTPase-activating protein [OS=Homo sapiens]	1.47852	0.981	1.38514	1.96269	1	1.46731	0.0114445	0.00338687	Rejected	Enriched
P15311	Ezrin [OS=Homo sapiens]	2.48923	0.98	2.18961	4.61788	1	2.14032	0.0115492	0.00342179	Rejected	Enriched
Q15003	Condensin complex subunit 2 [OS=Homo sapiens]	1.9148	0.98	1.74079	3.78517	1	1.91143	0.0116888	0.0034567	Rejected	Enriched
Q04323-2	Isoform 2 of UBX domain-containing protein 1 [OS=Homo sapiens]	4.57424	0.98	3.36707	3.28413	1	1.74542	0.0117237	0.00349162	Rejected	Enriched
Q9H7C9-1	Mth938 domain-containing protein [OS=Homo sapiens]	1.24542	0.979	1.21104	1.86695	1	1.43699	0.0119679	0.00352654	Rejected	Enriched
Q9UHB9	Signal recognition particle subunit SRP68 [OS=Homo sapiens]	3.1811	0.978	2.57848	6.86786	1	2.55605	0.0121075	0.00356145	Rejected	Enriched
P23396-1	40S ribosomal protein S3 [OS=Homo sapiens]	1.88584	0.974	1.7433	4.20962	1	1.95974	0.0130147	0.00359637	Rejected	Enriched
P08754	Guanine nucleotide-binding protein G(k) subunit alpha [OS=Homo sapiens]	3.78197	0.972	3.46682	5.49287	1	2.53959	0.0135031	0.00363128	Rejected	Enriched
P26038	Moesin [OS=Homo sapiens]	1.97576	0.971	1.81578	2.8248	1	1.62584	0.0135729	0.0036662	Rejected	Enriched
P54578	Ubiquitin carboxyl-terminal hydrolase 14 [OS=Homo sapiens]	1.66011	0.968	1.56761	2.0948	1	1.52711	0.0140614	0.00370112	Rejected	Enriched
P60660	Myosin light polypeptide 6 [OS=Homo sapiens]	2.98509	0.967	2.75081	2.94988	1	2.08502	0.0142708	0.00373603	Rejected	Enriched
Q14847-2	Isoform 2 of LIM and SH3 domain protein 1 [OS=Homo sapiens]	1.50837	0.957	1.47803	1.68908	1	1.34705	0.0156315	0.00377095	Rejected	Enriched
Q13505-1	Metaxin-1 [OS=Homo sapiens]	1.30846	0.952	1.30278	7.09416	1	2.27999	0.0163643	0.00380587	Rejected	Enriched
P60900	Proteasome subunit alpha type-6 [OS=Homo sapiens]	1.87703	0.95	1.85402	5.69116	1	2.89524	0.0166085	0.00384078	Rejected	Enriched
P61981	14-3-3 protein gamma [OS=Homo sapiens]	2.64088	0.94	2.7081	5.62388	1	2.30276	0.0178995	0.0038757	Rejected	Enriched
P63104-1	14-3-3 protein zeta/delta [OS=Homo sapiens]	1.66296	0.936	1.75685	4.41834	1	1.80814	0.0182484	0.00391061	Rejected	Enriched
P62195-1	26S protease regulatory subunit 8 [OS=Homo sapiens]	2.4109	0.935	2.47575	20.4208	1	8.05608	0.0183531	0.00394553	Rejected	Enriched
O00264	Membrane-associated progesterone receptor component 1 [OS=Homo sapiens]	2.00568	0.933	2.11142	7.05435	1	3.77726	0.018702	0.00398045	Rejected	Enriched
P50991	T-complex protein 1 subunit delta [OS=Homo sapiens]	1.7563	0.923	1.86592	6.25934	1	2.73929	0.0197139	0.00401536	Rejected	Enriched
Q96AE4	Far upstream element-binding protein 1 [OS=Homo sapiens]	2.05547	0.922	2.29082	3.71872	1	2.2447	0.0198535	0.00405028	Rejected	Enriched
P09429	High mobility group protein B1 [OS=Homo sapiens]	1.87068	0.921	2.03081	4.5765	1	2.34841	0.0200628	0.0040852	Rejected	Enriched
P17987	T-complex protein 1 subunit alpha [OS=Homo sapiens]	1.64083	0.915	1.81354	3.61635	1	2.13877	0.0208653	0.00412011	Rejected	Enriched
P62826	GTP-binding nuclear protein RAN [OS=Homo sapiens]	1.46867	0.904	1.61647	2.23892	1	1.52652	0.0219819	0.00415503	Rejected	Enriched
P0C0S5	Histone H2A.Z [OS=Homo sapiens]	3.35479	0.904	3.87873	7.08553	1	2.70202	0.0220167	0.00418994	Rejected	Enriched
Q9P0L0	vesicle-associated membrane protein-associated protein A [OS=Homo sapiens]	5.22157	0.901	7.53062	4.18159	1	2.30032	0.0222261	0.00422486	Rejected	Enriched
P22626	heterogeneous nuclear ribonucleoproteins A2/B1 [OS=Homo sapiens]	1.46874	0.899	1.64402	2.66691	1	1.75326	0.0225401	0.00425978	Rejected	Enriched
P06132	Uroporphyrinogen decarboxylase [OS=Homo sapiens]	1.53873	0.847	1.74625	3.62909	1	2.04459	0.027739	0.00429469	Rejected	Enriched
P30084	Enoyl-CoA hydratase, mitochondrial [OS=Homo sapiens]	1.97392	0.835	2.23639	3.99173	1	3.30855	0.0288555	0.00432961	Rejected	Enriched
P08195-4	Isoform 4 of 4F2 cell-surface antigen heavy chain [OS=Homo sapiens]	1.60544	0.806	2.43661	21.2428	1	2.9391	0.0311933	0.00436453	Rejected	Enriched
P26641-2	Isoform 2 of Elongation factor 1-gamma [OS=Homo sapiens]	1.39314	0.792	1.83445	3.12276	1	1.91277	0.0321703	0.00439944	Rejected	Enriched
Q9Y4P8-1	WD repeat domain phosphoinositide-interacting protein 2 [OS=Homo sapiens]	1.19189	0.792	1.38449	2.12045	1	1.53694	0.0322401	0.00443436	Rejected	Enriched
P07437	tubulin beta chain [OS=Homo sapiens]	1.29883	0.783	1.69243	4.31663	1	1.98779	0.0331472	0.00446927	Rejected	Enriched
P00387-3	Isoform 3 of NADH-cytochrome b5 reductase 3 [OS=Homo sapiens]	1.427	0.773	2.55562	4.24839	1	2.13342	0.0344033	0.00450419	Rejected	Enriched
Q15645	Pachytene checkpoint protein 2 homolog [OS=Homo sapiens]	1.40029	0.759	1.96417	3.00097	1	1.94326	0.035485	0.00453911	Rejected	Enriched
Q8WU90	Zinc finger CCCH domain-containing protein 15 [OS=Homo sapiens]	1.15612	0.704	1.61915	1.83959	1	1.41908	0.0393929	0.00457402	Rejected	Enriched
P62191	26S protease regulatory subunit 4 [OS=Homo sapiens]	1.15717	0.701	1.59205	3.18985	1	1.9882	0.0396022	0.00460894	Rejected	Enriched
P62888	60S ribosomal protein L30 [OS=Homo sapiens]	1.13726	0.634	1.55328	3.22263	1	1.75858	0.0441033	0.00464385	Rejected	Enriched
P60866-2	Isoform 2 of 40S ribosomal protein S20 [OS=Homo sapiens]	1.14774	0.609	2.12682	2.69884	1	1.8798	0.0461619	0.00467877	Rejected	Enriched
P55036-1	26S proteasome non-ATPase regulatory subunit 4 [OS=Homo sapiens]	1.10322	0.578	1.86566	3.24124	1	1.82343	0.0485694	0.00471369	Rejected	Enriched
Q9UK76-2	Isoform 2 of Hematological and neurological expressed 1 protein [OS=Homo sapiens]	2.02881	0.574	6.09512	5.82278	1	3.38717	0.049023	0.0047486	Rejected	Enriched
P06733-1	alpha-enolase [OS=Homo sapiens]	0.914258	0.507	1.71039	1.78246	1	1.45837	0.0533147	0.00478352	Rejected	Enriched
O14777	Kinetochore protein NDC80 homolog [OS=Homo sapiens]	0.988785	0.467	1.39929	1.67194	1	1.36728	0.0556176	0.00481844	Rejected	Enriched
P23528	Cofilin-1 [OS=Homo sapiens]	0.735006	0.464	2.6621	3.54072	1	1.8583	0.0557572	0.00485335	Rejected	Enriched
Q9Y3B4	Splicing factor 3B subunit 6 [OS=Homo sapiens]	0.926106	0.407	1.66803	3.21974	1	1.91331	0.0586532	0.00488827	Rejected	Enriched
P18669	Phosphoglycerate mutase 1 [OS=Homo sapiens]	0.802792	0.32	2.02282	5.08573	1	2.54139	0.063887	0.00492318	Rejected	Enriched
P42285	Superkiller viralicidic activity 2-like 2 [OS=Homo sapiens]	0.520612	0.228	2.33573	3.5046	1	2.98112	0.0687369	0.0049581	Rejected	Enriched
P00558	phosphoglycerate kinase 1 [OS=Homo sapiens]	0.291725	0.186	4.56958	2.8526	1	1.70961	0.0703419	0.00499302	Rejected	Enriched
P55769	NHP2-like protein 1 [OS=Homo sapiens]	0.451483	0.158	2.73936	3.16107	1	2.00893	0.071947	0.00502793	Rejected	Enriched
P49321-3	Isoform 3 of Nuclear autoantigenic sperm protein [OS=Homo sapiens]	2.15757	1	1.67314	1.93464	0.999	1.49239	0.000593161	0.00506285	Enriched	Enriched
P31689-1	DnaJ homolog subfamily A member 1 [OS=Homo sapiens]	8.23564	1	1.9837	4.06172	0.999	2.22592	0.00160502	0.00509777	Enriched	Enriched
Q05682-5	Isoform 5 of Caldesmon [OS=Homo sapiens]	4.08279	1	2.64514	3.01199	0.999	2.14412	0.00188416	0.00513268	Enriched	Enriched
Q99614	tetratricopeptide repeat protein 1 [OS=Homo sapiens]	4.56667	1	2.24232	3.51357	0.999	2.11781	0.00376832	0.0051676	Enriched	Enriched
O00592	Podocalyxin [OS=Homo sapiens]	7.89549	1	2.81966	12.1501	0.999	3.2923	0.00380321	0.00520251	Enriched	Enriched
O43765	Small glutamine-rich tetratricopeptide repeat-containing protein alpha [OS=Homo sapiens]	2.10331	0.999	1.79262	2.23456	0.999	1.71601	0.00481507	0.00523743	Enriched	Enriched
P55795	heterogeneous nuclear ribonucleoprotein H2 [OS=Homo sapiens]	4.86788	0.998	2.24002	12.8203	0.999	6.36629	0.0051291	0.00527235	Enriched	Enriched
P17812	CTP synthase 1 [OS=Homo sapiens]	1.59646	0.998	1.31105	2.27738	0.999	1.6227	0.00519888	0.00530726	Enriched	Enriched
P42167	Lamina-associated polypeptide 2, isoforms beta/gamma [OS=Homo sapiens]	2.77878	0.995	2.38715	4.2363	0.999	2.50494	0.00711793	0.00534218	Enriched	Enriched
P07476	Involucrin [OS=Homo sapiens]	5.27505	0.995	2.71226	3.23982	0.999	1.86403	0.00718772	0.00537709	Enriched	Enriched
Q92688	Acidic leucine-rich nuclear phosphoprotein 32 family member B [OS=Homo sapiens]	1.76485	0.981	1.5985	2.07609	0.999	1.53691	0.0114096	0.00541201	Rejected	Enriched
Q7KZF4	staphylococcal nuclease domain-containing protein 1 [OS=Homo sapiens]	2.86703	0.976	2.28373	2.19619	0.999	1.61184	0.012596	0.00544693	Rejected	Enriched
P52565-1	rho GDP-dissociation inhibitor 1 [OS=Homo sapiens]	2.35527	0.969	1.99415	2.75525	0.999	2.06991	0.013887	0.00548184	Rejected	Enriched
Q16555-1	Dihydropyrimidinase-related protein 2 [OS=Homo sapiens]	1.68125	0.929	1.74193	4.17357	0.999	2.76506	0.0191905	0.00551676	Rejected	Enriched
Q96K17-1	transcription factor BTF3 homolog 4 [OS=Homo sapiens]	2.21482	0.892	2.83649	8.00291	0.999	3.50704	0.0235171	0.00555168	Rejected	Enriched
Q15758-1	Neutral amino acid transporter B(0) [OS=Homo sapiens]	2.72898	0.854	3.09951	16.5542	0.999	7.87317	0.0271458	0.00558659	Rejected	Enriched
Q9H3Q1	Cdc42 effector protein 4 [OS=Homo sapiens]	2.76397	0.783	3.36242	3.79396	0.999	3.36475	0.0332519	0.00562151	Rejected	Enriched
Q9UKK9	ADP-sugar pyrophosphatase [OS=Homo sapiens]	1.11475	0.608	1.67046	3.42027	0.999	1.96389	0.0462317	0.00565642	Rejected	Enriched
Q96FQ6	Protein S100-A16 [OS=Homo sapiens]	2.00015	0.498	4.06477	2.23395	0.999	1.90217	0.0538381	0.00569134	Rejected	Enriched
P04406-1	glyceraldehyde-3-phosphate dehydrogenase [OS=Homo sapiens]	0.956606	0.493	1.46984	1.78315	0.999	1.43429	0.0542917	0.00572626	Rejected	Enriched
P61019-1	Ras-related protein Rab-2A [OS=Homo sapiens]	0.636927	0.148	1.66521	2.11868	0.999	1.53935	0.0725052	0.00576117	Rejected	Enriched
P30453	HLA class I histocompatibility antigen, A-34 alpha chain [OS=Homo sapiens]	0.527449	0.052	1.97736	2.82816	0.999	2.18518	0.078053	0.00579609	Rejected	Enriched
Q8N183	Mimitin, mitochondrial [OS=Homo sapiens]	0.66912	0.036	1.41854	1.71749	0.999	1.41561	0.0790998	0.00583101	Rejected	Enriched
P55072	Transitional endoplasmic reticulum ATPase [OS=Homo sapiens]	3.30324	1	1.91301	2.53758	0.998	1.97453	0.00038381	0.00586592	Enriched	Enriched
P51610-1	Host cell factor 1 [OS=Homo sapiens]	1.67597	1	1.38841	1.7594	0.998	1.4221	0.00195394	0.00590084	Enriched	Enriched
O43491-1	band 4.1-like protein 2 [OS=Homo sapiens]	3.07642	1	1.79744	3.22301	0.998	2.00235	0.00209351	0.00593575	Enriched	Enriched
P52907	F-actin-capping protein subunit alpha-1 [OS=Homo sapiens]	6.20479	1	2.83323	7.30006	0.998	2.66032	0.00223308	0.00597067	Enriched	Enriched
Q9Y266	nuclear migration protein nudC [OS=Homo sapiens]	3.2829	1	2.02615	2.47509	0.998	1.85789	0.00226797	0.00600559	Enriched	Enriched
P35579-1	Myosin-9 [OS=Homo sapiens]	2.18938	0.999	1.57392	2.46339	0.998	1.75185	0.00436148	0.0060405	Enriched	Enriched
P61247	40S ribosomal protein S3a [OS=Homo sapiens]	1.58032	0.999	1.31667	1.88439	0.998	1.47365	0.00446615	0.00607542	Enriched	Enriched
Q86T24	Transcriptional regulator Kaiso [OS=Homo sapiens]	1.44302	0.999	1.27988	1.54735	0.998	1.35273	0.00450105	0.00611034	Enriched	Enriched
Q01433-1	AMP deaminase 2 [OS=Homo sapiens]	8.50256	0.997	3.3168	5.24146	0.998	2.94047	0.00607118	0.00614525	Enriched	Enriched
P06703	protein S100-A6 [OS=Homo sapiens]	3.57728	0.997	2.11109	3.31784	0.998	1.91043	0.00631542	0.00618017	Enriched	Enriched
P16403	Histone H1.2 [OS=Homo sapiens]	3.05691	0.995	2.27325	5.01178	0.998	3.06995	0.00704815	0.00621508	Enriched	Enriched
Q12906-7	Isoform 7 of Interleukin enhancer-binding factor 3 [OS=Homo sapiens]	4.30646	0.991	2.87205	19.4833	0.998	5.18942	0.00837404	0.00625	Rejected	Enriched
P05198	Eukaryotic translation initiation factor 2 subunit 1 [OS=Homo sapiens]	1.99846	0.99	1.62378	2.85301	0.998	1.78465	0.00868807	0.00628492	Rejected	Enriched
P17980	26S protease regulatory subunit 6A [OS=Homo sapiens]	1.9452	0.988	1.72262	4.5444	0.998	2.11492	0.00949058	0.00631983	Rejected	Enriched
P43358	Melanoma-associated antigen 4 [OS=Homo sapiens]	2.75668	0.977	2.27852	3.55273	0.998	2.26782	0.0122819	0.00635475	Rejected	Enriched
P01892	HLA class I histocompatibility antigen, A-2 alpha chain [OS=Homo sapiens]	3.53921	0.949	3.5753	7.16398	0.998	2.34077	0.016783	0.00638966	Rejected	Enriched
O75369-1	Filamin-B [OS=Homo sapiens]	2.06357	0.921	2.26571	2.77117	0.998	1.95479	0.0200279	0.00642458	Rejected	Enriched
P62424	60S ribosomal protein L7a [OS=Homo sapiens]	1.16075	0.716	1.57301	1.96623	0.998	1.53531	0.038381	0.0064595	Rejected	Enriched
P47756-2	Isoform 2 of F-actin-capping protein subunit beta [OS=Homo sapiens]	3.38921	1	1.91441	2.67407	0.997	1.79679	0.0017097	0.00649441	Enriched	Enriched
P04899-4	Isoform sGi2 of Guanine nucleotide-binding protein G(i) subunit alpha-2 [OS=Homo sapiens]	12.807	1	2.96832	10.6863	0.997	3.84063	0.00202373	0.00652933	Enriched	Enriched
Q9NQC3-2	Isoform 2 of Reticulon-4 [OS=Homo sapiens]	1.81072	1	1.53695	1.76842	0.997	1.38456	0.00205862	0.00656425	Enriched	Enriched
Q15459	splicing factor 3A subunit 1 [OS=Homo sapiens]	6.83878	1	2.50804	5.37127	0.997	3.34324	0.00230286	0.00659916	Enriched	Enriched
Q6Y7W6-3	Isoform 2 of PERQ amino acid-rich with GYF domain-containing protein 2 [OS=Homo sapiens]	5.7855	1	2.21109	1.9089	0.997	1.46771	0.00314027	0.00663408	Enriched	Enriched
Q14145	Kelch-like ECH-associated protein 1 [OS=Homo sapiens]	2.32163	0.999	1.712	2.4075	0.997	1.79997	0.00498953	0.00666899	Enriched	Enriched
Q9UHB6	LIM domain and actin-binding protein 1 [OS=Homo sapiens]	2.09784	0.998	1.57123	1.8195	0.997	1.55683	0.00526867	0.00670391	Enriched	Enriched
P11413-2	Isoform Long of Glucose-6-phosphate 1-dehydrogenase [OS=Homo sapiens]	2.51787	0.994	1.89277	2.72941	0.997	1.87894	0.00757153	0.00673883	Enriched	Enriched
Q15043	Zinc transporter ZIP14 [OS=Homo sapiens]	4.43203	0.994	2.72194	5.83053	0.997	2.8907	0.00778088	0.00677374	Enriched	Enriched
P62701	40S ribosomal protein S4, X isoform [OS=Homo sapiens]	2.89515	0.991	1.984	2.83051	0.997	1.84143	0.00840893	0.00680866	Rejected	Enriched
Q8WW12	PEST proteolytic signal-containing nuclear protein [OS=Homo sapiens]	1.48851	0.989	1.35742	1.71215	0.997	1.46112	0.00921144	0.00684358	Rejected	Enriched
Q9NVM4	Protein arginine N-methyltransferase 7 [OS=Homo sapiens]	1.93699	0.98	1.67864	3.205	0.997	2.09638	0.0117934	0.00687849	Rejected	Enriched
Q13596-3	Isoform 3 of Sorting nexin-1 [OS=Homo sapiens]	4.12947	0.966	2.93022	2.33756	0.997	1.96597	0.0144452	0.00691341	Rejected	Enriched
P31153	S-adenosylmethionine synthase isoform type-2 [OS=Homo sapiens]	2.63622	0.962	2.567	2.86297	0.997	2.49447	0.0150733	0.00694832	Rejected	Enriched
P04083	annexin A1 [OS=Homo sapiens]	1.67119	0.952	1.64214	3.18497	0.997	2.07448	0.0161898	0.00698324	Rejected	Enriched
O76094	Signal recognition particle subunit SRP72 [OS=Homo sapiens]	1.87586	0.935	2.03469	2.6142	0.997	2.09281	0.018388	0.00701816	Rejected	Enriched
Q9UBI6	guanine nucleotide-binding protein g(i)/g(s)/g(o) subunit gamma-12 [OS=Homo sapiens]	5.215	0.934	5.51384	4.0687	0.997	2.66789	0.0186671	0.00705307	Rejected	Enriched
P39656	Dolichyl-diphosphooligosaccharide--protein glycosyltransferase 48 kDa subunit [OS=Homo sapiens]	1.51987	0.883	1.65872	2.89434	0.997	1.88285	0.0242149	0.00708799	Rejected	Enriched
Q96KR1	Zinc finger RNA-binding protein [OS=Homo sapiens]	1.52368	0.62	5.92434	3.00014	0.997	2.63391	0.0453943	0.00712291	Rejected	Enriched
P62837	ubiquitin-conjugating enzyme E2 D2 [OS=Homo sapiens]	5.50983	1	2.36427	5.06886	0.996	2.59066	0.00303559	0.00715782	Enriched	Enriched
P46783	40S ribosomal protein S10 [OS=Homo sapiens]	17.4416	0.997	8.88763	4.03198	0.996	2.38293	0.00589672	0.00719274	Enriched	Enriched
P26583	High mobility group protein B2 [OS=Homo sapiens]	2.068	0.98	1.83961	3.62709	0.996	2.287	0.0115841	0.00722765	Rejected	Enriched
Q9Y4W6	AFG3-like protein 2 [OS=Homo sapiens]	1.10486	0.58	2.41495	2.91352	0.996	2.03533	0.048395	0.00726257	Rejected	Enriched
Q6F5E8	capping protein, Arp2/3 and myosin-I linker protein 2 [OS=Homo sapiens]	1.06126	0.57	1.44481	1.42873	0.996	1.27568	0.0494068	0.00729749	Rejected	Enriched
Q92522	Histone H1x [OS=Homo sapiens]	1.08293	0.555	3.80483	2.60507	0.996	1.916	0.0504536	0.0073324	Rejected	Enriched
Q13200	26S proteasome non-ATPase regulatory subunit 2 [OS=Homo sapiens]	5.64984	1	2.62232	4.42428	0.995	2.43391	0.00101186	0.00736732	Enriched	Enriched
Q9BQE5	apolipoprotein L2 [OS=Homo sapiens]	4.989	1	2.12192	2.60608	0.995	1.97524	0.00359386	0.00740223	Enriched	Enriched
Q9UJX3-1	Anaphase-promoting complex subunit 7 [OS=Homo sapiens]	2.49259	1	1.84786	2.80061	0.995	2.0258	0.00418702	0.00743715	Enriched	Enriched
Q9GZZ1-1	N-alpha-acetyltransferase 50 [OS=Homo sapiens]	2.42528	0.974	2.18078	2.96818	0.995	2.20647	0.0131193	0.00747207	Rejected	Enriched
O14974	Protein phosphatase 1 regulatory subunit 12A [OS=Homo sapiens]	5.16774	0.967	4.47116	7.94644	0.995	5.64279	0.014201	0.00750698	Rejected	Enriched
P05556-1	Integrin beta-1 [OS=Homo sapiens]	4.66718	0.863	6.9757	4.2207	0.995	2.82161	0.0259944	0.0075419	Rejected	Enriched
P07737	profilin-1 [OS=Homo sapiens]	2.22761	0.745	5.2913	3.31913	0.995	2.32344	0.0363922	0.00757682	Rejected	Enriched
P12956	X-ray repair cross-complementing protein 6 [OS=Homo sapiens]	1.04786	0.554	1.61137	2.32638	0.995	1.94453	0.0505234	0.00761173	Rejected	Enriched
Q02790	Peptidyl-prolyl cis-trans isomerase FKBP4 [OS=Homo sapiens]	2.55001	1	1.90536	3.702	0.994	2.87825	0.000628053	0.00764665	Enriched	Enriched
Q9UHD9	Ubiquilin-2 [OS=Homo sapiens]	3.33221	1	2.13752	2.41989	0.994	1.81726	0.00272156	0.00768156	Enriched	Enriched
P57740	Nuclear pore complex protein Nup107 [OS=Homo sapiens]	5.17426	0.991	3.07315	5.31565	0.994	3.46583	0.00858339	0.00771648	Rejected	Enriched
P42224-1	Signal transducer and activator of transcription 1-alpha/beta [OS=Homo sapiens]	1.83724	0.981	1.75132	2.61297	0.994	1.85442	0.0113747	0.0077514	Rejected	Enriched
P13995	Bifunctional methylenetetrahydrofolate dehydrogenase/cyclohydrolase, mitochondrial [OS=Homo sapiens]	1.77148	0.922	1.94785	2.89767	0.994	2.01026	0.0199581	0.00778631	Rejected	Enriched
Q9H6J7-2	Isoform 2 of UPF0705 protein C11orf49 [OS=Homo sapiens]	1.72151	0.904	1.98018	2.31677	0.994	1.78964	0.0220865	0.00782123	Rejected	Enriched
P46063	ATP-dependent DNA helicase Q1 [OS=Homo sapiens]	2.6828	0.877	3.53461	11.2071	0.994	4.15867	0.024843	0.00785615	Rejected	Enriched
Q6UB35-1	Monofunctional C1-tetrahydrofolate synthase, mitochondrial [OS=Homo sapiens]	1.30463	0.741	2.16834	19.5974	0.994	7.83683	0.0366713	0.00789106	Rejected	Enriched
P22307-1	Non-specific lipid-transfer protein [OS=Homo sapiens]	1.09769	0.645	1.45924	1.82989	0.994	1.56499	0.0431961	0.00792598	Rejected	Enriched
O15173-2	Isoform 2 of Membrane-associated progesterone receptor component 2 [OS=Homo sapiens]	1.04835	0.605	1.51581	2.16256	0.994	1.70758	0.0464759	0.00796089	Rejected	Enriched
P50395-1	Rab GDP dissociation inhibitor beta [OS=Homo sapiens]	0.919842	0.372	1.42308	1.67601	0.994	1.41274	0.0610258	0.00799581	Rejected	Enriched
P14625	Endoplasmin [OS=Homo sapiens]	0.876814	0.349	2.09591	2.07726	0.994	1.70528	0.0623168	0.00803073	Rejected	Enriched
P34932	Heat shock 70 kDa protein 4 [OS=Homo sapiens]	8.48832	1	2.36071	2.80867	0.993	2.11876	0.000418702	0.00806564	Enriched	Enriched
B9A064-1	Immunoglobulin lambda-like polypeptide 5 [OS=Homo sapiens]	1.6584	0.998	1.45966	1.84024	0.993	1.50781	0.00561759	0.00810056	Enriched	Enriched
Q32MZ4	Leucine-rich repeat flightless-interacting protein 1 [OS=Homo sapiens]	2.82022	0.998	1.95134	3.09976	0.993	1.96869	0.00565248	0.00813547	Enriched	Enriched
Q15046-2	Isoform Mitochondrial of Lysine--tRNA ligase [OS=Homo sapiens]	1.53794	0.996	1.35545	4.50008	0.993	3.62175	0.00652477	0.00817039	Enriched	Enriched
P37802-2	Isoform 2 of Transgelin-2 [OS=Homo sapiens]	1.56088	0.993	1.38512	1.49975	0.993	1.33166	0.00788555	0.00820531	Enriched	Enriched
O94925-3	Isoform 3 of Glutaminase kidney isoform, mitochondrial [OS=Homo sapiens]	7.09585	0.988	5.56244	5.53737	0.993	3.24613	0.00945569	0.00824022	Rejected	Enriched
Q8IY81	pre-rRNA processing protein FTSJ3 [OS=Homo sapiens]	2.58823	0.975	2.20087	3.05944	0.993	2.59648	0.0128751	0.00827514	Rejected	Enriched
P45880-1	Isoform 1 of Voltage-dependent anion-selective channel protein 2 [OS=Homo sapiens]	2.54161	0.951	2.54161	3.15295	0.993	2.3077	0.0164341	0.00831006	Rejected	Enriched
Q01995	transgelin [OS=Homo sapiens]	1.69554	0.945	1.72683	2.08938	0.993	1.76781	0.0173064	0.00834497	Rejected	Enriched
P01859	Ig gamma-2 chain C region [OS=Homo sapiens]	1.65187	0.927	1.73615	2.72807	0.993	1.947	0.019365	0.00837989	Rejected	Enriched
P60174	Triosephosphate isomerase [OS=Homo sapiens]	1.1454	0.56	2.03131	1.84448	0.993	1.49268	0.0500698	0.0084148	Rejected	Enriched
P47929	galectin-7 [OS=Homo sapiens]	2.02801	1	1.49916	2.04984	0.992	1.79566	0.00251221	0.00844972	Enriched	Enriched
P55010	Eukaryotic translation initiation factor 5 [OS=Homo sapiens]	1.55815	1	1.33166	1.58137	0.992	1.40593	0.0030007	0.00848464	Enriched	Enriched
P61088	ubiquitin-conjugating enzyme E2 N [OS=Homo sapiens]	3.7513	0.995	2.16976	4.7443	0.992	2.46746	0.00732729	0.00851955	Enriched	Enriched
Q13813	Spectrin alpha chain, non-erythrocytic 1 [OS=Homo sapiens]	2.60374	0.994	2.07851	2.08398	0.992	1.75008	0.00750174	0.00855447	Enriched	Enriched
Q08188	Protein-glutamine gamma-glutamyltransferase E [OS=Homo sapiens]	2.66898	0.988	2.04547	5.39288	0.992	2.95141	0.00969993	0.00858939	Rejected	Enriched
P63241-2	Isoform 2 of Eukaryotic translation initiation factor 5A-1 [OS=Homo sapiens]	1.93079	0.979	1.65252	2.56347	0.992	2.09432	0.0118283	0.0086243	Rejected	Enriched
Q9UKY7	Protein CDV3 homolog [OS=Homo sapiens]	1.57183	0.961	1.53114	1.54214	0.992	1.3745	0.0152477	0.00865922	Rejected	Enriched
P82909	28S ribosomal protein S36, mitochondrial [OS=Homo sapiens]	1.18943	0.916	1.21394	1.23761	0.992	1.16314	0.0208304	0.00869413	Rejected	Enriched
Q13838-2	Isoform 2 of Spliceosome RNA helicase DDX39B [OS=Homo sapiens]	1.06511	0.661	1.35643	6.77087	0.992	3.22491	0.0421144	0.00872905	Rejected	Enriched
P10619	lysosomal protective protein [OS=Homo sapiens]	0.922478	0.321	1.45634	3.48549	0.992	2.55089	0.0638172	0.00876397	Rejected	Enriched
P78527	DNA-dependent protein kinase catalytic subunit [OS=Homo sapiens]	4.71819	1	2.37506	1.76135	0.991	1.57931	0.000314027	0.00879888	Enriched	Rejected
Q8NBS9-1	Thioredoxin domain-containing protein 5 [OS=Homo sapiens]	4.5316	1	2.28656	3.1803	0.991	2.18426	0.00216329	0.0088338	Enriched	Rejected
O14531	dihydropyrimidinase-related protein 4 [OS=Homo sapiens]	2.49649	1	1.80165	1.77769	0.991	1.54841	0.0042917	0.00886872	Enriched	Rejected
Q9H0A0	RNA cytidine acetyltransferase [OS=Homo sapiens]	5.60503	0.987	3.89339	21.1082	0.991	5.10525	0.00980461	0.00890363	Rejected	Rejected
Q8WYP5-2	Isoform 2 of Protein ELYS [OS=Homo sapiens]	2.74783	0.984	2.4258	2.80199	0.991	2.22666	0.0110258	0.00893855	Rejected	Rejected
O00541-1	Pescadillo homolog [OS=Homo sapiens]	1.58011	0.977	1.4636	1.78297	0.991	1.51454	0.0123866	0.00897346	Rejected	Rejected
Q86VI3	Ras GTPase-activating-like protein IQGAP3 [OS=Homo sapiens]	4.45641	0.958	4.40719	8.31064	0.991	3.51282	0.0155269	0.00900838	Rejected	Rejected
Q9UNP9-3	Isoform 3 of Peptidyl-prolyl cis-trans isomerase E [OS=Homo sapiens]	1.53581	0.944	1.5491	1.4709	0.991	1.39203	0.017411	0.0090433	Rejected	Rejected
P62917	60S ribosomal protein L8 [OS=Homo sapiens]	2.12294	0.857	2.73322	2.7193	0.991	2.12602	0.0268318	0.00907821	Rejected	Rejected
P55209	Nucleosome assembly protein 1-like 1 [OS=Homo sapiens]	1.38392	0.766	2.51043	3.62564	0.991	2.16325	0.0350314	0.00911313	Rejected	Rejected
P28066-1	Proteasome subunit alpha type-5 [OS=Homo sapiens]	1.06553	0.527	2.24132	3.36188	0.991	2.48847	0.052268	0.00914804	Rejected	Rejected
O75396	Vesicle-trafficking protein SEC22b [OS=Homo sapiens]	0.796528	0.218	1.56716	2.22874	0.991	1.81926	0.0691207	0.00918296	Rejected	Rejected
Q9Y3F4-2	Isoform 2 of Serine-threonine kinase receptor-associated protein [OS=Homo sapiens]	0.512014	0.096	2.13572	2.52925	0.991	1.89454	0.0752966	0.00921788	Rejected	Rejected
Q14126	Desmoglein-2 [OS=Homo sapiens]	2.0121	0.995	1.6386	2.20334	0.99	1.76265	0.00743196	0.00925279	Enriched	Rejected
P62333	26S protease regulatory subunit 10B [OS=Homo sapiens]	1.90905	0.99	1.66142	4.61535	0.99	3.62551	0.00882763	0.00928771	Rejected	Rejected
Q12768	WASH complex subunit strumpellin [OS=Homo sapiens]	3.69451	0.989	2.45757	3.92666	0.99	3.00776	0.00931612	0.00932263	Rejected	Rejected
P37198	nuclear pore glycoprotein p62 [OS=Homo sapiens]	1.48726	0.984	1.39785	1.73784	0.99	1.51779	0.0110607	0.00935754	Rejected	Rejected
P46821	microtubule-associated protein 1B [OS=Homo sapiens]	1.67459	0.935	1.76629	3.61311	0.99	2.64046	0.0184229	0.00939246	Rejected	Rejected
Q9H3N1	Thioredoxin-related transmembrane protein 1 [OS=Homo sapiens]	8.60999	0.924	9.35612	3.16598	0.99	2.67439	0.0196441	0.00942737	Rejected	Rejected
Q9UDW1	cytochrome b-c1 complex subunit 9 [OS=Homo sapiens]	1.38973	0.874	1.63147	1.4782	0.99	1.37241	0.0250872	0.00946229	Rejected	Rejected
Q9Y6H1	Coiled-coil-helix-coiled-coil-helix domain-containing protein 2 [OS=Homo sapiens]	3.00616	0.746	3.5915	3.77613	0.99	3.31137	0.0362875	0.00949721	Rejected	Rejected
P31150	Rab GDP dissociation inhibitor alpha [OS=Homo sapiens]	0.998809	0.511	1.42843	1.49219	0.99	1.37401	0.0531054	0.00953212	Rejected	Rejected
Q9H6R4-1	Nucleolar protein 6 [OS=Homo sapiens]	1.02379	0.5	2.53871	3.21547	0.99	2.48881	0.0536288	0.00956704	Rejected	Rejected
P30481	HLA class I histocompatibility antigen, B-44 alpha chain [OS=Homo sapiens]	0.936391	0.359	1.33418	1.64988	0.99	1.42153	0.0617237	0.00960196	Rejected	Rejected
P23588	eukaryotic translation initiation factor 4B [OS=Homo sapiens]	2.5291	0.999	1.9129	1.70032	0.989	1.46035	0.00453594	0.00963687	Enriched	Rejected
O75822	Eukaryotic translation initiation factor 3 subunit J [OS=Homo sapiens]	1.93839	0.966	1.86848	3.58558	0.989	2.81629	0.0143754	0.00967179	Rejected	Rejected
P09012	U1 SMALL NUCLEAR RIBONUCLEOPROTEIN A [OS=Homo sapiens]	2.83171	0.939	3.03767	2.86078	0.989	2.3348	0.0181089	0.0097067	Rejected	Rejected
P35270	Sepiapterin reductase [OS=Homo sapiens]	1.79455	0.548	3.57712	4.96651	0.989	4.52605	0.0511165	0.00974162	Rejected	Rejected
Q8N5K1	CDGSH iron-sulfur domain-containing protein 2 [OS=Homo sapiens]	0.952856	0.433	1.5934	1.33289	0.989	1.24357	0.057432	0.00977654	Rejected	Rejected
O60831	PRA1 family protein 2 [OS=Homo sapiens]	0.690492	0.124	1.63188	2.61106	0.989	2.05254	0.0742498	0.00981145	Rejected	Rejected
Q9UNZ2-5	Isoform 3 of NSFL1 cofactor p47 [OS=Homo sapiens]	1.91888	1	1.43314	1.5072	0.988	1.38178	0.00247732	0.00984637	Enriched	Rejected
Q9UHR5-1	SAP30-binding protein [OS=Homo sapiens]	1.508	1	1.25512	1.56	0.988	1.39074	0.00268667	0.00988128	Enriched	Rejected
Q12888-2	Isoform 2 of Tumor suppressor p53-binding protein 1 [OS=Homo sapiens]	2.24588	0.998	1.65435	1.92043	0.988	1.64088	0.00540823	0.0099162	Enriched	Rejected
Q86XR7-2	Isoform 2 of TIR domain-containing adapter molecule 2 [OS=Homo sapiens]	5.62325	0.992	2.80082	3.96025	0.988	3.04637	0.00833915	0.00995112	Enriched	Rejected
O14980	Exportin-1 [OS=Homo sapiens]	5.7992	0.929	7.19926	3.6998	0.988	2.78857	0.0192254	0.00998603	Rejected	Rejected
P24539	ATP synthase F(0) complex subunit B1, mitochondrial [OS=Homo sapiens]	3.13591	0.885	3.36639	1.58294	0.988	1.42897	0.0240405	0.0100209	Rejected	Rejected
Q16836-2	Isoform 2 of Hydroxyacyl-coenzyme A dehydrogenase, mitochondrial [OS=Homo sapiens]	1.03863	0.553	1.3968	4.26121	0.988	3.25244	0.0505583	0.0100559	Rejected	Rejected
P07305	Histone H1.0 [OS=Homo sapiens]	0.787628	0.288	2.30069	4.62015	0.988	4.04491	0.0653873	0.0100908	Rejected	Rejected
Q92598	Heat shock protein 105 kDa [OS=Homo sapiens]	2.95417	1	1.80693	2.56121	0.987	1.95283	0.000802512	0.0101257	Enriched	Rejected
P43243	Matrin-3 [OS=Homo sapiens]	2.81229	0.996	2.22086	1.80511	0.987	1.50509	0.0064201	0.0101606	Enriched	Rejected
P60903	Protein S100-A10 [OS=Homo sapiens]	1.47377	0.996	1.31821	1.81876	0.987	1.65675	0.00673412	0.0101955	Enriched	Rejected
O75533-1	splicing factor 3B subunit 1 [OS=Homo sapiens]	4.54115	0.992	2.67971	2.97431	0.987	2.30944	0.0081298	0.0102304	Enriched	Rejected
P46776	60S ribosomal protein L27a [OS=Homo sapiens]	2.64743	0.988	2.08129	2.88101	0.987	2.25503	0.00959525	0.0102654	Rejected	Rejected
E9PAV3	Nascent polypeptide-associated complex subunit alpha, muscle-specific form [OS=Homo sapiens]	2.21119	0.98	1.92642	2.41966	0.987	1.97267	0.0116539	0.0103003	Rejected	Rejected
Q15233	Non-POU domain-containing octamer-binding protein [OS=Homo sapiens]	5.97605	0.965	5.81371	1.67838	0.987	1.41268	0.0146546	0.0103352	Rejected	Rejected
P20618	proteasome subunit beta type-1 [OS=Homo sapiens]	2.1321	0.923	2.47467	4.05857	0.987	2.77593	0.0197488	0.0103701	Rejected	Rejected
P30085-1	UMP-CMP kinase [OS=Homo sapiens]	1.70528	0.844	2.36065	2.36486	0.987	2.03129	0.0279484	0.010405	Rejected	Rejected
Q9H299	SH3 domain-binding glutamic acid-rich-like protein 3 [OS=Homo sapiens]	1.12472	0.68	1.45677	1.63468	0.987	1.48798	0.040963	0.0104399	Rejected	Rejected
P61970	nuclear transport factor 2 [OS=Homo sapiens]	1.1826	0.624	2.43543	2.67546	0.987	2.19213	0.0450803	0.0104749	Rejected	Rejected
Q8N8S7	Protein enabled homolog [OS=Homo sapiens]	0.949894	0.455	2.17205	2.81468	0.987	2.23525	0.0563503	0.0105098	Rejected	Rejected
Q9Y6A5	Transforming acidic coiled-coil-containing protein 3 [OS=Homo sapiens]	0.93921	0.432	1.39722	1.33727	0.987	1.28287	0.0574669	0.0105447	Rejected	Rejected
P49959-3	Isoform 3 of Double-strand break repair protein MRE11A [OS=Homo sapiens]	2.1794	1	1.47621	1.93898	0.986	1.64516	0.0021284	0.0105796	Enriched	Rejected
P18583-9	Isoform I of Protein SON [OS=Homo sapiens]	2.66839	1	1.67586	2.00175	0.986	1.77895	0.00338451	0.0106145	Enriched	Rejected
Q9Y696	Chloride intracellular channel protein 4 [OS=Homo sapiens]	2.61407	0.957	2.53513	6.02167	0.986	3.01375	0.0155967	0.0106494	Rejected	Rejected
Q07955-1	Serine/arginine-rich splicing factor 1 [OS=Homo sapiens]	3.55505	0.917	4.95556	3.88074	0.986	3.01348	0.0206909	0.0106844	Rejected	Rejected
Q6P1M0	Long-chain fatty acid transport protein 4 [OS=Homo sapiens]	0.880601	0.308	1.40602	1.89771	0.986	1.5918	0.0644103	0.0107193	Rejected	Rejected
O95864	fatty acid desaturase 2 [OS=Homo sapiens]	5.35753	1	2.57321	11.4647	0.985	4.00922	0.00366364	0.0107542	Enriched	Rejected
O43242	26S proteasome non-ATPase regulatory subunit 3 [OS=Homo sapiens]	2.92681	0.982	2.41008	8.76573	0.985	7.38188	0.0112352	0.0107891	Rejected	Rejected
Q8IUE6	Histone H2A type 2-B [OS=Homo sapiens]	1.50681	0.943	1.53444	1.6042	0.985	1.46617	0.0175506	0.010824	Rejected	Rejected
P04350	Tubulin beta-4A chain [OS=Homo sapiens]	0.919824	0.324	1.33141	1.4424	0.985	1.34009	0.0635729	0.0108589	Rejected	Rejected
P39023	60S ribosomal protein L3 [OS=Homo sapiens]	3.64204	0.99	2.6073	3.05524	0.984	2.45607	0.00872296	0.0108939	Rejected	Rejected
P54709	sodium/potassium-transporting ATPase subunit beta-3 [OS=Homo sapiens]	1.37644	0.855	1.69498	1.75386	0.984	1.53152	0.0270063	0.0109288	Rejected	Rejected
Q9UJS0-2	Isoform 2 of Calcium-binding mitochondrial carrier protein Aralar2 [OS=Homo sapiens]	1.15221	0.771	1.38905	1.36238	0.984	1.29139	0.0346127	0.0109637	Rejected	Rejected
P09493-3	Isoform 3 of Tropomyosin alpha-1 chain [OS=Homo sapiens]	1.07178	0.62	1.3966	1.58145	0.984	1.45939	0.0452896	0.0109986	Rejected	Rejected
P08574	Cytochrome c1, heme protein, mitochondrial [OS=Homo sapiens]	1.12163	0.601	1.98133	3.93047	0.984	3.58418	0.0469644	0.0110335	Rejected	Rejected
Q9H3P2-1	Negative elongation factor A [OS=Homo sapiens]	0.831266	0.197	1.41185	1.5811	0.984	1.41016	0.0698186	0.0110684	Rejected	Rejected
O15260-1	surfeit locus protein 4 [OS=Homo sapiens]	0.855865	0.172	1.24101	1.44535	0.984	1.36202	0.0711445	0.0111034	Rejected	Rejected
Q14980-1	nuclear mitotic apparatus protein 1 [OS=Homo sapiens]	5.94846	1	2.43525	2.32881	0.983	1.84699	0.00118632	0.0111383	Enriched	Rejected
P61086	Ubiquitin-conjugating enzyme E2 K [OS=Homo sapiens]	2.62725	0.968	2.44221	3.74529	0.983	3.15576	0.0141312	0.0111732	Rejected	Rejected
Q9BQ69	O-acetyl-ADP-ribose deacetylase MACROD1 [OS=Homo sapiens]	2.09712	0.918	2.26102	4.01272	0.983	3.49182	0.020656	0.0112081	Rejected	Rejected
Q15773	Myeloid leukemia factor 2 [OS=Homo sapiens]	1.22634	0.857	1.3517	1.67815	0.983	1.53559	0.0269365	0.011243	Rejected	Rejected
Q9Y678	Coatomer subunit gamma-1 [OS=Homo sapiens]	9.58641	0.827	10.9827	25.8738	0.983	21.1227	0.0297627	0.0112779	Rejected	Rejected
Q9UBG0	C-type mannose receptor 2 [OS=Homo sapiens]	1.17171	0.757	1.44313	1.4811	0.983	1.37394	0.0356246	0.0113128	Rejected	Rejected
P18124	60S ribosomal protein L7 [OS=Homo sapiens]	1.69163	0.674	2.80555	2.9623	0.983	2.33952	0.0414515	0.0113478	Rejected	Rejected
P67809	Nuclease-sensitive element-binding protein 1 [OS=Homo sapiens]	1.08192	0.572	1.84338	2.03481	0.983	1.82908	0.0491626	0.0113827	Rejected	Rejected
Q96HS1-1	Serine/threonine-protein phosphatase Pgam5, mitochondrial [OS=Homo sapiens]	0.562351	0.304	3.51254	7.39315	0.983	3.7707	0.0646895	0.0114176	Rejected	Rejected
Q15654-1	thyroid receptor-interacting protein 6 [OS=Homo sapiens]	0.456617	0.146	2.52637	2.44584	0.983	2.18203	0.0726448	0.0114525	Rejected	Rejected
P23246-1	splicing factor, proline- and glutamine-rich [OS=Homo sapiens]	2.18387	0.976	1.91153	2.29745	0.982	2.04026	0.0124913	0.0114874	Rejected	Rejected
Q13011	Delta(3,5)-Delta(2,4)-dienoyl-CoA isomerase, mitochondrial [OS=Homo sapiens]	1.80382	0.933	1.90377	3.24654	0.982	2.74655	0.0188067	0.0115223	Rejected	Rejected
Q9Y570-4	Isoform 4 of Protein phosphatase methylesterase 1 [OS=Homo sapiens]	8.21019	0.807	11.1289	4.11069	0.982	2.98449	0.0309839	0.0115573	Rejected	Rejected
Q9HC07	Transmembrane protein 165 [OS=Homo sapiens]	1.2077	0.755	1.50409	1.6673	0.982	1.45441	0.0357292	0.0115922	Rejected	Rejected
P01111	GTPase NRas [OS=Homo sapiens]	2.99721	0.612	3.78217	1.5146	0.982	1.39939	0.0460223	0.0116271	Rejected	Rejected
P48449-1	lanosterol synthase [OS=Homo sapiens]	2.42881	0.908	4.14283	4.48594	0.981	3.93379	0.021598	0.011662	Rejected	Rejected
P27797	Calreticulin [OS=Homo sapiens]	1.82021	0.784	3.34464	3.0496	0.981	2.54735	0.0330775	0.0116969	Rejected	Rejected
Q12788	Transducin beta-like protein 3 [OS=Homo sapiens]	1.00423	0.499	1.28954	1.37012	0.981	1.2795	0.0536636	0.0117318	Rejected	Rejected
P38117-2	Isoform 2 of Electron transfer flavoprotein subunit beta [OS=Homo sapiens]	0.71708	0.191	1.67612	1.78528	0.981	1.58847	0.0700279	0.0117668	Rejected	Rejected
Q9Y5K6	CD2-associated protein [OS=Homo sapiens]	1.43334	0.977	1.38138	1.5645	0.98	1.46284	0.0123517	0.0118017	Rejected	Rejected
P22087	rRNA 2'-O-methyltransferase fibrillarin [OS=Homo sapiens]	2.97661	0.966	2.79138	2.59654	0.98	2.11273	0.0143405	0.0118366	Rejected	Rejected
O95159	Zinc finger protein-like 1 [OS=Homo sapiens]	1.32253	0.819	1.53075	1.41875	0.98	1.35597	0.0301814	0.0118715	Rejected	Rejected
P68036	Ubiquitin-conjugating enzyme E2 L3 [OS=Homo sapiens]	1.23708	0.727	1.50658	1.45482	0.98	1.37287	0.0375087	0.0119064	Rejected	Rejected
P02786	Transferrin receptor protein 1 [OS=Homo sapiens]	2.13677	0.932	2.16463	4.76873	0.979	4.03734	0.0188416	0.0119413	Rejected	Rejected
Q9BSC4-1	Nucleolar protein 10 [OS=Homo sapiens]	2.39098	0.758	3.08194	1.77275	0.979	1.65367	0.0355897	0.0119763	Rejected	Rejected
Q9NQT5	exosome complex component RRP40 [OS=Homo sapiens]	1.10321	0.626	1.57525	1.95417	0.979	1.72101	0.0449407	0.0120112	Rejected	Rejected
Q96C19	EF-hand domain-containing protein D2 [OS=Homo sapiens]	1.99466	1	1.53435	1.47618	0.978	1.36175	0.00279135	0.0120461	Enriched	Rejected
Q9Y4L1	Hypoxia up-regulated protein 1 [OS=Homo sapiens]	3.02114	0.995	2.12729	4.2688	0.978	3.51738	0.00708304	0.012081	Enriched	Rejected
Q9NR50-1	Translation initiation factor eIF-2B subunit gamma [OS=Homo sapiens]	1.11519	0.648	1.67652	2.28312	0.978	2.04767	0.0430216	0.0121159	Rejected	Rejected
Q9BY44-1	Eukaryotic translation initiation factor 2A [OS=Homo sapiens]	1.1428	0.578	2.59611	3.06807	0.978	2.64883	0.0485345	0.0121508	Rejected	Rejected
P35659-1	Protein DEK [OS=Homo sapiens]	0.985577	0.504	3.22534	11.8363	0.978	10.6327	0.0534543	0.0121858	Rejected	Rejected
P83916	Chromobox protein homolog 1 [OS=Homo sapiens]	0.552767	0.168	2.78679	4.26111	0.978	3.15901	0.0713538	0.0122207	Rejected	Rejected
O43852-3	Isoform 3 of Calumenin [OS=Homo sapiens]	2.33945	0.894	2.8162	2.06918	0.977	1.68437	0.023238	0.0122556	Rejected	Rejected
Q9Y3D0	Mitotic spindle-associated MMXD complex subunit MIP18 [OS=Homo sapiens]	2.65002	0.804	3.25637	4.42132	0.977	4.03831	0.0313329	0.0122905	Rejected	Rejected
Q92797-1	Symplekin [OS=Homo sapiens]	1.41294	0.796	2.04971	2.25455	0.977	1.92088	0.0318911	0.0123254	Rejected	Rejected
Q15084-2	Isoform 2 of Protein disulfide-isomerase A6 [OS=Homo sapiens]	1.28647	0.669	2.39934	3.40251	0.977	2.96702	0.0417306	0.0123603	Rejected	Rejected
Q8N1N4	Keratin, type II cytoskeletal 78 [OS=Homo sapiens]	1.05813	0.599	1.52046	2.36165	0.977	2.21894	0.047104	0.0123953	Rejected	Rejected
Q9UNH7-1	Sorting nexin-6 [OS=Homo sapiens]	0.932026	0.443	29.3332	1.99779	0.977	1.74359	0.0569435	0.0124302	Rejected	Rejected
Q9H0U4	ras-related protein Rab-1B [OS=Homo sapiens]	40.2781	1	22.1624	1.58704	0.976	1.52668	0.00139567	0.0124651	Enriched	Rejected
Q5SSJ5-1	Heterochromatin protein 1-binding protein 3 [OS=Homo sapiens]	3.20902	0.997	2.19465	2.0264	0.976	1.8395	0.00593161	0.0125	Enriched	Rejected
Q8TBC4-1	NEDD8-activating enzyme E1 catalytic subunit [OS=Homo sapiens]	4.90627	0.962	4.85438	7.19901	0.976	4.56453	0.0150035	0.0125349	Rejected	Rejected
O75223-1	gamma-glutamylcyclotransferase [OS=Homo sapiens]	2.57977	0.955	2.55888	3.45303	0.976	2.63926	0.0160154	0.0125698	Rejected	Rejected
Q8TED1	Probable glutathione peroxidase 8 [OS=Homo sapiens]	3.553	0.9	8.36212	4.95705	0.976	3.09402	0.0224703	0.0126047	Rejected	Rejected
Q9BXJ9	N-alpha-acetyltransferase 15, NatA auxiliary subunit [OS=Homo sapiens]	1.63967	0.869	1.72619	1.8086	0.976	1.60096	0.0255059	0.0126397	Rejected	Rejected
P50914	60S ribosomal protein L14 [OS=Homo sapiens]	0.841826	0.348	2.0489	3.6075	0.976	2.69234	0.0624564	0.0126746	Rejected	Rejected
P49642	DNA primase small subunit [OS=Homo sapiens]	0.569948	0.275	2.22316	1.541	0.976	1.4558	0.0659456	0.0127095	Rejected	Rejected
P09661	U2 small nuclear ribonucleoprotein A' [OS=Homo sapiens]	0.718517	0.047	1.39213	1.71223	0.976	1.60352	0.0784368	0.0127444	Rejected	Rejected
Q9BVP2	Guanine nucleotide-binding protein-like 3 [OS=Homo sapiens]	18.967	0.999	6.92388	16.428	0.975	11.8712	0.00484997	0.0127793	Enriched	Rejected
O14633	Late cornified envelope protein 2B [OS=Homo sapiens]	1.85866	0.988	1.47677	2.86141	0.975	2.27903	0.00976971	0.0128142	Rejected	Rejected
Q13268	dehydrogenase/reductase SDR family member 2, mitochondrial [OS=Homo sapiens]	1.36638	0.791	1.85787	2.4113	0.975	2.13695	0.0322749	0.0128492	Rejected	Rejected
O60216	Double-strand-break repair protein rad21 homolog [OS=Homo sapiens]	0.754747	0.093	1.36575	1.46513	0.975	1.36479	0.0755059	0.0128841	Rejected	Rejected
Q13177	Serine/threonine-protein kinase PAK 2 [OS=Homo sapiens]	3.42675	0.993	2.4416	6.72705	0.974	5.50411	0.00802512	0.012919	Enriched	Rejected
Q13428-4	Isoform 4 of Treacle protein [OS=Homo sapiens]	1.77326	0.992	1.5356	1.51839	0.974	1.4272	0.00823447	0.0129539	Enriched	Rejected
P05141	ADP/ATP translocase 2 [OS=Homo sapiens]	2.2923	0.985	1.96846	2.88595	0.974	2.3785	0.0104327	0.0129888	Rejected	Rejected
P52758	Ribonuclease UK114 [OS=Homo sapiens]	1.75418	0.965	1.66133	1.66614	0.974	1.57488	0.0147592	0.0130237	Rejected	Rejected
P49753-1	Acyl-coenzyme A thioesterase 2, mitochondrial [OS=Homo sapiens]	2766.9	0.963	2683.14	16.1571	0.974	15.1141	0.0147941	0.0130587	Rejected	Rejected
Q8IZP0	abl interactor 1 [OS=Homo sapiens]	1.86846	0.917	2.12056	2.89923	0.974	2.27287	0.0207258	0.0130936	Rejected	Rejected
Q13263	Transcription intermediary factor 1-beta [OS=Homo sapiens]	5.456	0.829	7.87802	29.0036	0.974	25.0961	0.0294487	0.0131285	Rejected	Rejected
P13489	Ribonuclease inhibitor [OS=Homo sapiens]	0.654757	0.17	2.17364	4.26572	0.974	3.58369	0.0712142	0.0131634	Rejected	Rejected
Q9UDY2-7	Isoform 7 of Tight junction protein ZO-2 [OS=Homo sapiens]	1.26011	0.895	1.3778	1.78121	0.973	1.65333	0.0229937	0.0131983	Rejected	Rejected
P62258-1	14-3-3 protein epsilon [OS=Homo sapiens]	1.67898	0.866	1.94672	3.12018	0.973	2.91463	0.0257851	0.0132332	Rejected	Rejected
P63220	40S ribosomal protein S21 [OS=Homo sapiens]	1.44914	0.855	1.72026	1.63024	0.973	1.57777	0.0270412	0.0132682	Rejected	Rejected
Q8NFJ5	Retinoic acid-induced protein 3 [OS=Homo sapiens]	1.4497	0.762	2.67161	2.48692	0.973	2.28525	0.0352408	0.0133031	Rejected	Rejected
Q01469	Fatty acid-binding protein, epidermal [OS=Homo sapiens]	1.07249	0.57	1.639	2.31299	0.973	2.11967	0.0493022	0.013338	Rejected	Rejected
Q9NZZ3	Charged multivesicular body protein 5 [OS=Homo sapiens]	1.95606	1	1.49217	1.75658	0.972	1.68302	0.00331472	0.0133729	Enriched	Rejected
O75152	Zinc finger CCCH domain-containing protein 11A [OS=Homo sapiens]	1.36586	0.966	1.30304	1.34655	0.972	1.31404	0.0145848	0.0134078	Rejected	Rejected
Q03135	Caveolin-1 [OS=Homo sapiens]	2.75159	0.931	2.88988	1.44955	0.972	1.4149	0.0189812	0.0134427	Rejected	Rejected
P42357	Histidine ammonia-lyase [OS=Homo sapiens]	1.54969	0.691	2.68933	4.75003	0.972	3.97382	0.0401954	0.0134777	Rejected	Rejected
Q8TCJ2	Dolichyl-diphosphooligosaccharide--protein glycosyltransferase subunit STT3B [OS=Homo sapiens]	7.53726	0.683	10.1468	15.6522	0.972	14.39	0.0407188	0.0135126	Rejected	Rejected
Q13151	Heterogeneous nuclear ribonucleoprotein A0 [OS=Homo sapiens]	1.15862	0.588	1.72096	2.04901	0.972	1.83866	0.0478716	0.0135475	Rejected	Rejected
Q92621	Nuclear pore complex protein Nup205 [OS=Homo sapiens]	0.619283	0.043	1.54079	1.49905	0.972	1.45712	0.0785066	0.0135824	Rejected	Rejected
P31942	Heterogeneous nuclear ribonucleoprotein H3 [OS=Homo sapiens]	1.25648	0.733	1.72297	1.89275	0.971	1.78441	0.0370202	0.0136173	Rejected	Rejected
P61586	Transforming protein RhoA [OS=Homo sapiens]	0.924664	0.385	2.46365	3.42338	0.971	3.01349	0.0600837	0.0136522	Rejected	Rejected
P29317	Ephrin type-A receptor 2 [OS=Homo sapiens]	2.94768	0.995	2.35994	2.39921	0.97	2.16219	0.00739707	0.0136872	Enriched	Rejected
Q93052	Lipoma-preferred partner [OS=Homo sapiens]	1.70547	0.975	1.54722	1.85339	0.97	1.76869	0.0129449	0.0137221	Rejected	Rejected
Q15424-3	Isoform 3 of Scaffold attachment factor B1 [OS=Homo sapiens]	2.16281	0.959	2.14488	1.96736	0.97	1.85772	0.0154222	0.013757	Rejected	Rejected
Q14498-1	RNA-binding protein 39 [OS=Homo sapiens]	1.72088	0.944	1.74679	3.57908	0.97	2.92905	0.0173412	0.0137919	Rejected	Rejected
Q15165-1	Isoform 1 of Serum paraoxonase/arylesterase 2 [OS=Homo sapiens]	1.35906	0.839	1.7035	1.24797	0.97	1.2101	0.0286462	0.0138268	Rejected	Rejected
Q01813	ATP-dependent 6-phosphofructokinase, platelet type [OS=Homo sapiens]	1.13727	0.61	2.10638	2.90415	0.97	2.5092	0.046127	0.0138617	Rejected	Rejected
Q86UE8	Serine/threonine-protein kinase tousled-like 2 [OS=Homo sapiens]	6.66216	0.997	4.20287	3.4712	0.969	2.91582	0.00628053	0.0138966	Enriched	Rejected
Q5JU85-2	Isoform 2 of IQ motif and SEC7 domain-containing protein 2 [OS=Homo sapiens]	1.65844	0.957	1.6384	2.23313	0.969	2.0936	0.015806	0.0139316	Rejected	Rejected
P29354-1	Growth factor receptor-bound protein 2 [OS=Homo sapiens]	1.71791	0.86	3.15582	3.14839	0.969	2.91455	0.0264829	0.0139665	Rejected	Rejected
Q5U5X0	Complex III assembly factor LYRM7 [OS=Homo sapiens]	1.07983	0.598	1.40646	1.34809	0.969	1.31899	0.0472087	0.0140014	Rejected	Rejected
P63173	60s ribosomal protein l38 [OS=Homo sapiens]	0.891609	0.381	2.50657	3.1439	0.969	2.8923	0.0602931	0.0140363	Rejected	Rejected
Q13671	ras and Rab interactor 1 [OS=Homo sapiens]	0.87614	0.334	1.59557	1.46044	0.969	1.40473	0.0632938	0.0140712	Rejected	Rejected
P26599-3	Isoform 3 of Polypyrimidine tract-binding protein 1 [OS=Homo sapiens]	1.34704	0.611	5.31108	3.42349	0.968	3.18236	0.0460572	0.0141061	Rejected	Rejected
Q00839-2	Isoform Short of Heterogeneous nuclear ribonucleoprotein U [OS=Homo sapiens]	0.705341	0.084	1.41096	1.6787	0.968	1.6248	0.0763084	0.0141411	Rejected	Rejected
Q00341-1	Vigilin [OS=Homo sapiens]	10.8559	0.977	3.65071	13.0166	0.967	3.38451	0.0123168	0.014176	Rejected	Rejected
Q02413	Desmoglein-1 [OS=Homo sapiens]	1.1131	0.634	1.59867	2.3407	0.967	2.20375	0.0440684	0.0142109	Rejected	Rejected
P43246-1	DNA mismatch repair protein MSH2 [OS=Homo sapiens]	0.460314	0.159	2.9831	2.75631	0.967	2.46825	0.0717725	0.0142458	Rejected	Rejected
P23443-1	Ribosomal protein S6 kinase beta-1 [OS=Homo sapiens]	0.843377	0.092	1.24728	1.36977	0.967	1.34271	0.0756804	0.0142807	Rejected	Rejected
Q13501-1	sequestosome-1 [OS=Homo sapiens]	3.62882	0.995	2.24224	2.2997	0.966	2.11631	0.00746685	0.0143156	Enriched	Rejected
P11388-4	Isoform 4 of DNA topoisomerase 2-alpha [OS=Homo sapiens]	7.90977	0.99	3.42449	9.41724	0.966	8.726	0.00875785	0.0143506	Rejected	Rejected
Q9UPN3-5	Isoform 4 of Microtubule-actin cross-linking factor 1, isoforms 1/2/3/5 [OS=Homo sapiens]	1.13834	0.861	1.22332	1.43769	0.966	1.38889	0.0264131	0.0143855	Rejected	Rejected
Q14690	Protein RRP5 homolog [OS=Homo sapiens]	2.04513	0.798	2.84294	1.58989	0.966	1.54014	0.0317167	0.0144204	Rejected	Rejected
Q96MU7-1	YTH domain-containing protein 1 [OS=Homo sapiens]	0.886865	0.272	1.36604	1.5145	0.966	1.42684	0.0662945	0.0144553	Rejected	Rejected
P51572-2	Isoform 2 of B-cell receptor-associated protein 31 [OS=Homo sapiens]	4.00264	1	2.11019	1.77063	0.965	1.70802	0.00198883	0.0144902	Enriched	Rejected
P06702	Protein S100-A9 [OS=Homo sapiens]	1.76755	0.98	1.68812	1.7605	0.965	1.70339	0.0117585	0.0145251	Rejected	Rejected
P38606	V-type proton ATPase catalytic subunit A [OS=Homo sapiens]	2.81834	0.975	2.56763	4.03182	0.965	3.94706	0.0128053	0.0145601	Rejected	Rejected
P10809	60 kDa heat shock protein, mitochondrial [OS=Homo sapiens]	2.94774	0.95	2.94781	4.37821	0.965	3.74308	0.0165736	0.014595	Rejected	Rejected
Q9P2M7-1	cingulin [OS=Homo sapiens]	1.40795	0.924	1.47409	1.50209	0.965	1.41629	0.019679	0.0146299	Rejected	Rejected
O00410-3	Isoform 3 of Importin-5 [OS=Homo sapiens]	1.63076	0.889	1.92912	5.17398	0.965	4.75529	0.0236916	0.0146648	Rejected	Rejected
P13693	Translationally-controlled tumor protein [OS=Homo sapiens]	1.24639	0.783	1.64272	2.36313	0.965	2.23659	0.033217	0.0146997	Rejected	Rejected
P49756-1	RNA-binding protein 25 [OS=Homo sapiens]	1.91953	0.769	2.3207	4.16358	0.965	4.05441	0.0348221	0.0147346	Rejected	Rejected
P35268	60S ribosomal protein L22 [OS=Homo sapiens]	1.09055	0.676	1.31729	1.36999	0.965	1.33394	0.041277	0.0147696	Rejected	Rejected
P13646	Keratin, type I cytoskeletal 13 [OS=Homo sapiens]	0.667803	0.322	5.48545	13.0578	0.965	12.7715	0.0636776	0.0148045	Rejected	Rejected
P17480-1	Nucleolar transcription factor 1 [OS=Homo sapiens]	0.840874	0.048	1.16188	1.69346	0.965	1.63953	0.0783671	0.0148394	Rejected	Rejected
P21796	voltage-dependent anion-selective channel protein 1 [OS=Homo sapiens]	24.5329	0.994	4.92272	11.4875	0.964	4.41828	0.00760642	0.0148743	Enriched	Rejected
P06748	Nucleophosmin [OS=Homo sapiens]	2.19896	0.992	1.83636	1.88766	0.964	1.82192	0.00809491	0.0149092	Enriched	Rejected
O43583	density-regulated protein [OS=Homo sapiens]	1.0238	0.55	1.50166	1.27504	0.964	1.25939	0.0508025	0.0149441	Rejected	Rejected
O60828	Polyglutamine-binding protein 1 [OS=Homo sapiens]	0.877177	0.497	5.00028	1.39085	0.964	1.37848	0.0539777	0.0149791	Rejected	Rejected
Q6PJG6-1	BRCA1-associated ATM activator 1 [OS=Homo sapiens]	0.803454	0.323	2.16914	2.77928	0.964	2.59716	0.0636078	0.015014	Rejected	Rejected
P25705-1	ATP synthase subunit alpha, mitochondrial [OS=Homo sapiens]	2.57945	0.988	2.25964	1.62269	0.963	1.55317	0.0093859	0.0150489	Rejected	Rejected
P46779-3	Isoform 3 of 60S ribosomal protein L28 [OS=Homo sapiens]	1.84662	0.979	1.69743	1.96459	0.963	1.8949	0.0118632	0.0150838	Rejected	Rejected
P46926	glucosamine-6-phosphate isomerase 1 [OS=Homo sapiens]	2.7531	1	1.77519	2.03418	0.962	1.88624	0.00348918	0.0151187	Enriched	Rejected
Q96CW1	AP-2 complex subunit mu [OS=Homo sapiens]	1.73802	0.839	2.17228	2.00192	0.962	1.95293	0.0285415	0.0151536	Rejected	Rejected
Q9NPD8	Ubiquitin-conjugating enzyme E2 T [OS=Homo sapiens]	1.03522	0.576	1.27802	1.8676	0.962	1.84194	0.0489532	0.0151885	Rejected	Rejected
P24534	Elongation factor 1-beta [OS=Homo sapiens]	0.44896	0.179	2.56425	1.96328	0.962	1.8186	0.0707258	0.0152235	Rejected	Rejected
Q04837	Single-stranded DNA-binding protein, mitochondrial [OS=Homo sapiens]	8.33855	0.957	7.09177	5.15349	0.961	4.84201	0.0157362	0.0152584	Rejected	Rejected
O00139-2	Isoform 2 of Kinesin-like protein KIF2A [OS=Homo sapiens]	1.49571	0.93	1.56883	1.47146	0.961	1.45441	0.0190858	0.0152933	Rejected	Rejected
Q6KB66-3	Isoform 3 of Keratin, type II cytoskeletal 80 [OS=Homo sapiens]	1.50865	0.918	1.59087	2.37921	0.961	2.2207	0.0205862	0.0153282	Rejected	Rejected
Q02809-2	Isoform 2 of Procollagen-lysine,2-oxoglutarate 5-dioxygenase 1 [OS=Homo sapiens]	64.8478	0.854	72.2476	1.3171	0.961	1.30017	0.0271807	0.0153631	Rejected	Rejected
P21281	V-type proton ATPase subunit B, brain isoform [OS=Homo sapiens]	3.75525	0.997	2.30935	2.86827	0.96	2.60028	0.00579204	0.015398	Enriched	Rejected
Q9NTJ3-1	Structural maintenance of chromosomes protein 4 [OS=Homo sapiens]	4.0687	0.993	3.41422	2.68605	0.96	2.54752	0.00795534	0.015433	Enriched	Rejected
O00468	Agrin [OS=Homo sapiens]	6.41883	0.977	4.21357	2.6342	0.96	2.51431	0.0124564	0.0154679	Rejected	Rejected
O75534-4	Isoform 4 of Cold shock domain-containing protein E1 [OS=Homo sapiens]	2.58002	0.878	3.21203	3.10172	0.96	3.03865	0.0245987	0.0155028	Rejected	Rejected
Q13144	Translation initiation factor eIF-2B subunit epsilon [OS=Homo sapiens]	1.91935	0.781	4.67404	6.48584	0.96	6.24701	0.0334962	0.0155377	Rejected	Rejected
Q9UJW0-3	Isoform 3 of Dynactin subunit 4 [OS=Homo sapiens]	0.903043	0.354	1.55488	1.40749	0.96	1.37987	0.0621773	0.0155726	Rejected	Rejected
P43307	Translocon-associated protein subunit alpha [OS=Homo sapiens]	10.7316	1	3.08	2.2409	0.959	2.10015	0.00387299	0.0156075	Enriched	Rejected
Q9P258	Protein RCC2 [OS=Homo sapiens]	7.12472	0.996	3.40875	3.97208	0.959	3.62394	0.00669923	0.0156425	Enriched	Rejected
P25786-2	Isoform Long of Proteasome subunit alpha type-1 [OS=Homo sapiens]	4.79291	0.986	3.50753	3.84417	0.959	3.72262	0.0101535	0.0156774	Rejected	Rejected
Q92905	COP9 signalosome complex subunit 5 [OS=Homo sapiens]	1.76559	0.847	2.81216	2.54092	0.959	2.3623	0.0277739	0.0157123	Rejected	Rejected
Q9BV86-1	N-terminal Xaa-Pro-Lys N-methyltransferase 1 [OS=Homo sapiens]	1.50478	0.795	2.70836	6.36735	0.959	5.9515	0.0319609	0.0157472	Rejected	Rejected
Q13748-1	tubulin alpha-3C/D chain [OS=Homo sapiens]	3.00449	0.585	4.73443	1.64249	0.959	1.57949	0.0480809	0.0157821	Rejected	Rejected
Q9H9P8-1	L-2-hydroxyglutarate dehydrogenase, mitochondrial [OS=Homo sapiens]	27.091	0.995	23.6354	4.80747	0.958	4.76844	0.00729239	0.015817	Enriched	Rejected
P17844	probable ATP-dependent RNA helicase DDX5 [OS=Homo sapiens]	1.34041	0.676	3.22627	2.08649	0.958	1.99307	0.0412073	0.015852	Rejected	Rejected
P36871-1	Phosphoglucomutase-1 [OS=Homo sapiens]	1.17936	0.597	4.36321	6.16778	0.958	5.95057	0.0472435	0.0158869	Rejected	Rejected
P09972	Fructose-bisphosphate aldolase C [OS=Homo sapiens]	0.904626	0.404	1.94687	2.6222	0.958	2.57851	0.0588625	0.0159218	Rejected	Rejected
P26368	Splicing factor U2AF 65 kDa subunit [OS=Homo sapiens]	0.911606	0.348	1.48456	1.61339	0.958	1.56333	0.0624913	0.0159567	Rejected	Rejected
O60869-1	Endothelial differentiation-related factor 1 [OS=Homo sapiens]	20.8437	1	3.71006	17.3678	0.957	12.5778	0.00334962	0.0159916	Enriched	Rejected
Q08554-1	Desmocollin-1 [OS=Homo sapiens]	1.41897	0.916	1.54821	2.52949	0.957	2.47936	0.0207955	0.0160265	Rejected	Rejected
P39687	Acidic leucine-rich nuclear phosphoprotein 32 family member A [OS=Homo sapiens]	0.920672	0.376	6.18198	5.23717	0.957	5.04721	0.0607816	0.0160615	Rejected	Rejected
P46109	Crk-like protein [OS=Homo sapiens]	0.80926	0.316	2.15653	11.8752	0.957	11.6527	0.0640614	0.0160964	Rejected	Rejected
Q86V48-1	Leucine zipper protein 1 [OS=Homo sapiens]	2.00602	0.984	1.79412	1.40078	0.956	1.38772	0.0109909	0.0161313	Rejected	Rejected
Q95604	HLA class I histocompatibility antigen, Cw-17 alpha chain [OS=Homo sapiens]	1.93725	0.918	2.33655	4.18366	0.956	3.97551	0.0206211	0.0161662	Rejected	Rejected
Q9NX46	Poly(ADP-ribose) glycohydrolase ARH3 [OS=Homo sapiens]	1.0133	0.535	1.39913	1.41076	0.956	1.40085	0.0517795	0.0162011	Rejected	Rejected
P43355	Melanoma-associated antigen 1 [OS=Homo sapiens]	0.734037	0.065	1.38496	1.43164	0.956	1.41993	0.0772854	0.016236	Rejected	Rejected
P09525	annexin A4 [OS=Homo sapiens]	2.17968	0.999	1.67505	1.53241	0.955	1.52685	0.00467551	0.0162709	Enriched	Rejected
Q8WVV4-1	Isoform 1 of Protein POF1B [OS=Homo sapiens]	1.23202	0.77	1.57779	1.47187	0.955	1.46067	0.0346825	0.0163059	Rejected	Rejected
P62861	40S ribosomal protein S30 [OS=Homo sapiens]	1.42833	0.706	2.20632	2.2099	0.955	2.18672	0.0392533	0.0163408	Rejected	Rejected
Q08211	Atp-dependent rna helicase a [OS=Homo sapiens]	1.3799	0.651	14.6438	10.4946	0.955	10.167	0.0428123	0.0163757	Rejected	Rejected
Q8TCS8	Polyribonucleotide nucleotidyltransferase 1, mitochondrial [OS=Homo sapiens]	1.75439	0.63	2.62971	1.29173	0.955	1.28285	0.0443824	0.0164106	Rejected	Rejected
P31944	Caspase-14 [OS=Homo sapiens]	2.07136	0.99	1.7214	2.41389	0.954	2.40819	0.00886253	0.0164455	Rejected	Rejected
Q9BQA1	Methylosome protein 50 [OS=Homo sapiens]	1.31351	0.962	1.27817	1.47389	0.954	1.45652	0.0151431	0.0164804	Rejected	Rejected
Q13425-1	Beta-2-syntrophin [OS=Homo sapiens]	1.2954	0.718	2.3179	5.00007	0.954	4.91922	0.0382066	0.0165154	Rejected	Rejected
P32969	60S ribosomal protein L9 [OS=Homo sapiens]	2.87717	0.619	5.55264	2.40454	0.954	2.36576	0.0454292	0.0165503	Rejected	Rejected
P61289-2	Isoform 2 of Proteasome activator complex subunit 3 [OS=Homo sapiens]	0.984553	0.506	1.67146	1.65192	0.954	1.64412	0.0533845	0.0165852	Rejected	Rejected
P40855-1	Peroxisomal biogenesis factor 19 [OS=Homo sapiens]	0.674365	0.073	1.54732	1.43471	0.954	1.42487	0.0768667	0.0166201	Rejected	Rejected
Q658Y4	Protein FAM91A1 [OS=Homo sapiens]	1.69998	0.991	1.49584	2.0905	0.953	2.05526	0.00851361	0.016655	Rejected	Rejected
P37837	Transaldolase [OS=Homo sapiens]	2.02493	0.886	2.93326	24.2364	0.953	23.6834	0.0239358	0.0166899	Rejected	Rejected
P82979	SAP domain-containing ribonucleoprotein [OS=Homo sapiens]	1.74229	0.63	3.63304	7.17574	0.953	7.11017	0.0442777	0.0167249	Rejected	Rejected
O75182-1	paired amphipathic helix protein sin3b [OS=Homo sapiens]	1.0835	0.62	1.39128	1.60173	0.953	1.60045	0.0453245	0.0167598	Rejected	Rejected
Q99798	Aconitate hydratase, mitochondrial [OS=Homo sapiens]	1.1928	0.517	2.74373	2.01215	0.953	1.99173	0.0526169	0.0167947	Rejected	Rejected
Q8N201	integrator complex subunit 1 [OS=Homo sapiens]	0.933326	0.254	1.15794	1.22902	0.953	1.22634	0.0674808	0.0168296	Rejected	Rejected
P84090	Enhancer of rudimentary homolog [OS=Homo sapiens]	3.17307	0.985	2.92066	2.08909	0.952	2.08909	0.0105373	0.0168645	Rejected	Rejected
P11166	Solute carrier family 2, facilitated glucose transporter member 1 [OS=Homo sapiens]	2.41455	0.979	2.0686	2.80803	0.952	2.80803	0.0118981	0.0168994	Rejected	Rejected
O75643-1	U5 small nuclear ribonucleoprotein 200 kDa helicase [OS=Homo sapiens]	0.546822	0.239	3.57674	1.98112	0.952	1.97034	0.0680042	0.0169344	Rejected	Rejected
Q08209-1	Serine/threonine-protein phosphatase 2B catalytic subunit alpha isoform [OS=Homo sapiens]	6.11978	0.986	4.81675	4.7514	0.951	4.71768	0.0102582	0.0169693	Rejected	Rejected
Q93008-3	Probable ubiquitin carboxyl-terminal hydrolase FAF-X [OS=Homo sapiens]	2.3031	0.887	2.64517	2.29907	0.951	2.29532	0.0239009	0.0170042	Rejected	Rejected
P25788-1	Proteasome subunit alpha type-3 [OS=Homo sapiens]	3.88381	0.865	5.44513	3.69194	0.951	3.69194	0.0258548	0.0170391	Rejected	Rejected
P49773	Histidine triad nucleotide-binding protein 1 [OS=Homo sapiens]	1.41984	0.708	2.41999	1.97342	0.951	1.97065	0.0389742	0.017074	Rejected	Rejected
Q5VYK3	Proteasome-associated protein ECM29 homolog [OS=Homo sapiens]	3.52167	0.604	4.73258	1.8392	0.951	1.8392	0.0465457	0.0171089	Rejected	Rejected
P32119	Peroxiredoxin-2 [OS=Homo sapiens]	0.898562	0.401	1.62129	3.1976	0.951	3.1943	0.0590719	0.0171439	Rejected	Rejected
P30520	adenylosuccinate synthetase isozyme 2 [OS=Homo sapiens]	0.790074	0.297	2.11061	1.83639	0.951	1.83639	0.0649686	0.0171788	Rejected	Rejected
O60518	ran-binding protein 6 [OS=Homo sapiens]	0.294372	0.091	3.93034	8.75207	0.951	8.73618	0.0757153	0.0172137	Rejected	Rejected
Q9BZE4	Nucleolar GTP-binding protein 1 [OS=Homo sapiens]	3.13933	0.99	2.78443	2.50526	0.95	2.50531	0.0089672	0.0172486	Rejected	Rejected
Q96HE7	ERO1-like protein alpha [OS=Homo sapiens]	2.52606	0.978	2.29804	3.60214	0.95	3.60235	0.0120377	0.0172835	Rejected	Rejected
P42704	Leucine-rich PPR motif-containing protein, mitochondrial [OS=Homo sapiens]	1.96285	0.888	2.17033	2.21141	0.95	2.20039	0.0237264	0.0173184	Rejected	Rejected
P47755	F-actin-capping protein subunit alpha-2 [OS=Homo sapiens]	2.90879	0.974	2.65675	2.52949	0.949	2.53973	0.0131542	0.0173534	Rejected	Rejected
Q14677-3	Isoform 3 of Clathrin interactor 1 [OS=Homo sapiens]	5.24188	1	2.65938	2.13576	0.948	2.13875	0.0034194	0.0173883	Enriched	Rejected
Q13206	probable ATP-dependent RNA helicase DDX10 [OS=Homo sapiens]	1.56416	0.89	1.81362	1.92867	0.948	1.94176	0.0236567	0.0174232	Rejected	Rejected
P54819	Adenylate kinase 2, mitochondrial [OS=Homo sapiens]	2.46109	0.943	2.57068	5.043	0.947	5.08471	0.0174459	0.0174581	Rejected	Rejected
Q5TFE4	5'-nucleotidase domain-containing protein 1 [OS=Homo sapiens]	4.24215	0.883	4.58335	53.9042	0.947	54.4281	0.0242498	0.017493	Rejected	Rejected
Q9UBS4	DnaJ homolog subfamily B member 11 [OS=Homo sapiens]	3.52909	0.522	5.20486	1.52803	0.946	1.53712	0.0524424	0.0175279	Rejected	Rejected
Q14008-3	Isoform 3 of Cytoskeleton-associated protein 5 [OS=Homo sapiens]	1.74788	0.999	1.46419	1.37397	0.945	1.3846	0.00460572	0.0175628	Enriched	Rejected
Q9Y3A3	MOB-like protein phocein [OS=Homo sapiens]	1.5209	0.971	1.45283	1.47582	0.945	1.48919	0.0136427	0.0175978	Rejected	Rejected
Q14344	Guanine nucleotide-binding protein subunit alpha-13 [OS=Homo sapiens]	1.68939	0.857	1.91228	3.0568	0.945	3.09657	0.0269016	0.0176327	Rejected	Rejected
P04818	thymidylate synthase [OS=Homo sapiens]	2.12508	0.781	4.32598	2.87292	0.945	2.94938	0.0333566	0.0176676	Rejected	Rejected
Q99623	Prohibitin-2 [OS=Homo sapiens]	0.955168	0.461	2.09765	3.56343	0.945	3.63502	0.0560363	0.0177025	Rejected	Rejected
P10515	Dihydrolipoyllysine-residue acetyltransferase component of pyruvate dehydrogenase complex, mitochondrial [OS=Homo sapiens]	0.553168	0.238	2.84323	3.33102	0.945	3.52828	0.0681089	0.0177374	Rejected	Rejected
O43708	maleylacetoacetate isomerase [OS=Homo sapiens]	0.739375	0.065	1.388	3.00549	0.945	3.02132	0.0772156	0.0177723	Rejected	Rejected
P49721	proteasome subunit beta type-2 [OS=Homo sapiens]	1.70214	0.893	1.87731	1.41422	0.944	1.4377	0.0233426	0.0178073	Rejected	Rejected
P62854	40S ribosomal protein S26 [OS=Homo sapiens]	1.40097	0.861	1.60457	1.54042	0.944	1.55976	0.0263782	0.0178422	Rejected	Rejected
Q16181	Septin-7 [OS=Homo sapiens]	1.29755	0.678	3.26039	4.86179	0.944	4.99295	0.0411026	0.0178771	Rejected	Rejected
O00429-4	Isoform 3 of Dynamin-1-like protein [OS=Homo sapiens]	1.08178	0.613	1.59489	1.4284	0.944	1.43495	0.0459177	0.017912	Rejected	Rejected
P46777	60S ribosomal protein L5 [OS=Homo sapiens]	3.92421	0.99	2.74441	1.99839	0.943	2.03271	0.00865318	0.0179469	Rejected	Rejected
O95373	Importin-7 [OS=Homo sapiens]	2.10247	0.742	3.43986	2.44255	0.943	2.50168	0.0366015	0.0179818	Rejected	Rejected
Q16643-3	Isoform 3 of Drebrin [OS=Homo sapiens]	2.71681	0.991	2.25591	2.82394	0.942	2.89484	0.00844382	0.0180168	Rejected	Rejected
P06737-1	Glycogen phosphorylase, liver form [OS=Homo sapiens]	1.84267	0.886	2.40496	2.89077	0.942	3.01942	0.0239707	0.0180517	Rejected	Rejected
Q15006	ER membrane protein complex subunit 2 [OS=Homo sapiens]	1.42684	0.793	1.64004	2.85559	0.942	2.87583	0.0321354	0.0180866	Rejected	Rejected
Q12874	splicing factor 3a subunit 3 [OS=Homo sapiens]	0.993693	0.478	1.30263	1.35834	0.942	1.37482	0.0549197	0.0181215	Rejected	Rejected
Q9UQ80	proliferation-associated protein 2G4 [OS=Homo sapiens]	0.947657	0.42	1.49513	2.00452	0.942	2.05299	0.0581647	0.0181564	Rejected	Rejected
P20020	Plasma membrane calcium-transporting ATPase 1 [OS=Homo sapiens]	1.70502	0.884	1.98562	1.53536	0.941	1.59449	0.02418	0.0181913	Rejected	Rejected
Q99460	26S proteasome non-ATPase regulatory subunit 1 [OS=Homo sapiens]	1.70805	0.842	2.31923	2.4226	0.941	2.60184	0.0282275	0.0182263	Rejected	Rejected
Q9UHY7	Enolase-phosphatase E1 [OS=Homo sapiens]	3.18632	0.831	3.32191	5.22798	0.941	5.5082	0.0291696	0.0182612	Rejected	Rejected
Q9H2M9	Rab3 GTPase-activating protein non-catalytic subunit [OS=Homo sapiens]	1.15548	0.627	2.02537	1.82805	0.941	1.85252	0.044836	0.0182961	Rejected	Rejected
P62277	40S ribosomal protein S13 [OS=Homo sapiens]	1.08892	0.581	1.70967	1.77674	0.941	1.83507	0.0482903	0.018331	Rejected	Rejected
Q92973-1	transportin-1 [OS=Homo sapiens]	5.59837	1	2.40558	2.19596	0.94	2.36373	0.00174459	0.0183659	Enriched	Rejected
P61221	ATP-binding cassette sub-family E member 1 [OS=Homo sapiens]	5.87989	0.988	2.84365	2.28449	0.94	2.38455	0.00952547	0.0184008	Rejected	Rejected
P31949	protein S100-A11 [OS=Homo sapiens]	1.57623	0.973	1.46914	1.94904	0.94	2.03218	0.013224	0.0184358	Rejected	Rejected
P33176	Kinesin-1 heavy chain [OS=Homo sapiens]	3.49096	1	2.28552	1.77569	0.939	1.81162	0.00108165	0.0184707	Enriched	Rejected
Q8N543	prolyl 3-hydroxylase OGFOD1 [OS=Homo sapiens]	3.45324	1	2.22841	1.26652	0.939	1.27723	0.00422191	0.0185056	Enriched	Rejected
P84085	ADP-ribosylation factor 5 [OS=Homo sapiens]	2.01557	0.987	1.76177	1.56302	0.939	1.58842	0.00990928	0.0185405	Rejected	Rejected
P10768	S-formylglutathione hydrolase [OS=Homo sapiens]	3.0691	0.96	3.06695	1.71981	0.939	1.74978	0.0153175	0.0185754	Rejected	Rejected
Q63HN8-4	Isoform 2 of E3 ubiquitin-protein ligase RNF213 [OS=Homo sapiens]	8.98174	0.946	9.0635	4.6192	0.939	4.89103	0.0171319	0.0186103	Rejected	Rejected
Q9NTZ6	RNA-binding protein 12 [OS=Homo sapiens]	0.951385	0.403	1.39389	2.1037	0.939	2.15438	0.0589672	0.0186453	Rejected	Rejected
Q9Y2L1-1	exosome complex exonuclease RRP44 [OS=Homo sapiens]	5.441	0.981	4.07297	5.83278	0.938	5.9812	0.0114794	0.0186802	Rejected	Rejected
P49757	Protein numb homolog [OS=Homo sapiens]	2.27276	0.981	1.92246	1.51595	0.938	1.55784	0.0115143	0.0187151	Rejected	Rejected
P28340	DNA polymerase delta catalytic subunit [OS=Homo sapiens]	18.662	0.814	22.4019	3.3169	0.938	3.36162	0.030635	0.01875	Rejected	Rejected
P07954	fumarate hydratase, mitochondrial [OS=Homo sapiens]	1.28157	0.678	2.98332	4.02488	0.938	4.08206	0.0411375	0.0187849	Rejected	Rejected
Q8N8N7-1	Prostaglandin reductase 2 [OS=Homo sapiens]	1.27155	0.58	3.17106	3.99148	0.938	4.11827	0.0484299	0.0188198	Rejected	Rejected
P07951-2	Isoform 2 of Tropomyosin beta chain [OS=Homo sapiens]	0.792651	0.179	1.50791	1.50318	0.938	1.5377	0.0706909	0.0188547	Rejected	Rejected
P40227-1	T-complex protein 1 subunit zeta [OS=Homo sapiens]	2.41174	0.981	2.26759	1.62664	0.937	1.65577	0.011305	0.0188897	Rejected	Rejected
Q8IVT2	Mitotic interactor and substrate of PLK1 [OS=Homo sapiens]	2.01108	1	1.56557	1.24649	0.936	1.27162	0.0042568	0.0189246	Enriched	Rejected
Q99700-1	Ataxin-2 [OS=Homo sapiens]	1.80415	0.965	1.69356	1.46515	0.936	1.48901	0.0147244	0.0189595	Rejected	Rejected
O95721	Synaptosomal-associated protein 29 [OS=Homo sapiens]	1.44563	0.938	1.50103	1.42457	0.936	1.44089	0.0181438	0.0189944	Rejected	Rejected
O00303	Eukaryotic translation initiation factor 3 subunit F [OS=Homo sapiens]	1.76575	0.867	2.17283	2.23404	0.936	2.49009	0.0256804	0.0190293	Rejected	Rejected
Q9Y3A5	Ribosome maturation protein SBDS [OS=Homo sapiens]	2.72104	0.867	3.58755	4.10547	0.936	4.27381	0.0257153	0.0190642	Rejected	Rejected
Q9Y2A7-2	Isoform 2 of Nck-associated protein 1 [OS=Homo sapiens]	2.23541	0.854	2.62501	1.91599	0.936	1.95127	0.027111	0.0190992	Rejected	Rejected
P40261	Nicotinamide N-methyltransferase [OS=Homo sapiens]	1.26227	0.712	1.98858	1.97465	0.936	2.06131	0.0386602	0.0191341	Rejected	Rejected
P35221	Catenin alpha-1 [OS=Homo sapiens]	0.854026	0.496	2.58725	2.52174	0.936	2.61833	0.0540823	0.019169	Rejected	Rejected
P28838	cytosol aminopeptidase [OS=Homo sapiens]	2.271	0.998	1.72015	1.5324	0.935	1.57586	0.00530356	0.0192039	Enriched	Rejected
Q9NQZ2	Something about silencing protein 10 [OS=Homo sapiens]	3.22398	0.985	2.85923	1.41019	0.935	1.43321	0.010642	0.0192388	Rejected	Rejected
Q08J23	tRNA (Cytosine(34)-C(5))-methyltransferase [OS=Homo sapiens]	3.15051	0.919	3.47024	1.99892	0.935	2.08008	0.0204117	0.0192737	Rejected	Rejected
Q16851	UTP--glucose-1-phosphate uridylyltransferase [OS=Homo sapiens]	1.92953	0.858	2.40208	6.89295	0.935	7.07553	0.0266923	0.0193087	Rejected	Rejected
P01834	Ig kappa chain C region [OS=Homo sapiens]	1.27509	0.789	1.51917	1.39028	0.935	1.41188	0.032589	0.0193436	Rejected	Rejected
Q16795	NADH dehydrogenase [ubiquinone] 1 alpha subcomplex subunit 9, mitochondrial [OS=Homo sapiens]	1.04401	0.603	4.73585	2.76063	0.935	2.84148	0.0467202	0.0193785	Rejected	Rejected
Q15785	Mitochondrial import receptor subunit TOM34 [OS=Homo sapiens]	1.2531	0.572	2.30763	2.64281	0.935	2.78326	0.0491975	0.0194134	Rejected	Rejected
P14868	Aspartate--tRNA ligase, cytoplasmic [OS=Homo sapiens]	1.48245	0.971	1.39025	1.80481	0.934	1.963	0.0136078	0.0194483	Rejected	Rejected
Q15366-3	Isoform 3 of Poly(rC)-binding protein 2 [OS=Homo sapiens]	0.965699	0.458	2.50222	2.94707	0.934	3.00494	0.0561759	0.0194832	Rejected	Rejected
P49005	DNA polymerase delta subunit 2 [OS=Homo sapiens]	0.886348	0.267	1.39681	1.44585	0.934	1.5229	0.0666434	0.0195182	Rejected	Rejected
P10909-2	Isoform 2 of Clusterin [OS=Homo sapiens]	0.869801	0.217	1.36876	1.32104	0.934	1.34853	0.0692254	0.0195531	Rejected	Rejected
P48426	phosphatidylinositol 5-phosphate 4-kinase type-2 alpha [OS=Homo sapiens]	0.26683	0.008	2.91891	2.88888	0.934	3.31624	0.0807397	0.019588	Rejected	Rejected
Q9NR46-2	Isoform 2 of Endophilin-B2 [OS=Homo sapiens]	0.939388	0.424	1.65332	1.76391	0.933	1.81696	0.0578856	0.0196229	Rejected	Rejected
O94915-1	protein furry homolog-like [OS=Homo sapiens]	1.72754	0.994	1.47982	1.39186	0.932	1.43204	0.00781577	0.0196578	Enriched	Rejected
Q99439	Calponin-2 [OS=Homo sapiens]	2.25375	0.976	1.92384	2.14375	0.932	2.28143	0.0126657	0.0196927	Rejected	Rejected
Q9ULP9	TBC1 domain family member 24 [OS=Homo sapiens]	2.60022	0.662	3.11845	1.26886	0.932	1.28996	0.0420796	0.0197277	Rejected	Rejected
P20962	Parathymosin [OS=Homo sapiens]	1.82228	0.599	3.52616	1.62801	0.932	1.68973	0.0471738	0.0197626	Rejected	Rejected
Q15398-3	Isoform 3 of Disks large-associated protein 5 [OS=Homo sapiens]	1.08537	0.553	4.03955	2.93883	0.932	3.01676	0.0506281	0.0197975	Rejected	Rejected
P63244	Receptor of activated protein C kinase 1 [OS=Homo sapiens]	0.897199	0.429	2.86431	3.22828	0.932	3.44559	0.0575366	0.0198324	Rejected	Rejected
Q7KZ85	transcription elongation factor spt6 [OS=Homo sapiens]	0.940806	0.389	1.47897	1.46068	0.932	1.50653	0.0599791	0.0198673	Rejected	Rejected
Q14839-2	Isoform 2 of Chromodomain-helicase-DNA-binding protein 4 [OS=Homo sapiens]	3.32206	1	1.8266	1.27608	0.931	1.29632	0.00150035	0.0199022	Enriched	Rejected
Q08945	FACT complex subunit SSRP1 [OS=Homo sapiens]	4.08291	0.996	2.51483	2.08742	0.931	2.23294	0.00655967	0.0199372	Enriched	Rejected
P25789	Proteasome subunit alpha type-4 [OS=Homo sapiens]	2.47813	0.975	2.31471	2.54218	0.931	2.65539	0.0128402	0.0199721	Rejected	Rejected
Q99729-2	Isoform 2 of Heterogeneous nuclear ribonucleoprotein A/B [OS=Homo sapiens]	1.63087	0.599	11.5027	8.80934	0.931	9.82473	0.0471389	0.020007	Rejected	Rejected
P61978-2	Isoform 2 of Heterogeneous nuclear ribonucleoprotein K [OS=Homo sapiens]	1.04906	0.577	1.52731	1.41463	0.931	1.50464	0.0487439	0.0200419	Rejected	Rejected
Q9UGV2	protein NDRG3 [OS=Homo sapiens]	1.00743	0.483	1.46432	1.39652	0.931	1.42815	0.0547453	0.0200768	Rejected	Rejected
P12814-1	Alpha-actinin-1 [OS=Homo sapiens]	0.910672	0.373	1.64519	1.558	0.931	1.68014	0.0609909	0.0201117	Rejected	Rejected
O14950	Myosin regulatory light chain 12B [OS=Homo sapiens]	2.35011	0.9	2.80978	2.68262	0.93	3.0206	0.0224006	0.0201466	Rejected	Rejected
Q9Y262	eukaryotic translation initiation factor 3 subunit L [OS=Homo sapiens]	2.5438	0.822	3.61461	2.05423	0.929	2.26302	0.030007	0.0201816	Rejected	Rejected
Q8IUD2-1	ELKS/Rab6-interacting/CAST family member 1 [OS=Homo sapiens]	1.99361	0.813	2.71391	1.98209	0.929	2.09758	0.0307048	0.0202165	Rejected	Rejected
Q9UKM9-1	RNA-binding protein Raly [OS=Homo sapiens]	1.52171	0.789	1.83909	1.975	0.929	2.04436	0.0325192	0.0202514	Rejected	Rejected
P48147	prolyl endopeptidase [OS=Homo sapiens]	2.58129	0.723	6.43512	7.37481	0.929	8.29036	0.0378576	0.0202863	Rejected	Rejected
Q6ZVX7	F-box only protein 50 [OS=Homo sapiens]	1.21899	0.719	1.68615	2.53374	0.929	2.77595	0.0380321	0.0203212	Rejected	Rejected
Q5T749	Keratinocyte proline-rich protein [OS=Homo sapiens]	0.797134	0.176	1.39523	1.85458	0.929	2.06234	0.0709002	0.0203561	Rejected	Rejected
P52272	Heterogeneous nuclear ribonucleoprotein M [OS=Homo sapiens]	1.75025	1	1.54474	1.17711	0.928	1.19659	0.00076762	0.0203911	Enriched	Rejected
P62269	40S ribosomal protein S18 [OS=Homo sapiens]	2.98121	0.997	2.06918	2.00772	0.928	2.13101	0.00586183	0.020426	Enriched	Rejected
P05026	Sodium/potassium-transporting ATPase subunit beta-1 [OS=Homo sapiens]	6.40821	0.994	3.71037	2.05331	0.928	2.2021	0.0077111	0.0204609	Enriched	Rejected
P31939	bifunctional purine biosynthesis protein purH [OS=Homo sapiens]	3.14608	0.968	2.74256	3.35506	0.928	3.62873	0.0139916	0.0204958	Rejected	Rejected
P42126	Enoyl-CoA delta isomerase 1, mitochondrial [OS=Homo sapiens]	2.58636	0.655	4.64841	5.36255	0.928	6.0353	0.0426029	0.0205307	Rejected	Rejected
O43813	LanC-like protein 1 [OS=Homo sapiens]	1.41919	0.617	2.08615	1.79539	0.928	1.91297	0.0457432	0.0205656	Rejected	Rejected
O14964	Hepatocyte growth factor-regulated tyrosine kinase substrate [OS=Homo sapiens]	1.82148	0.578	2.28253	1.6417	0.928	1.73299	0.048709	0.0206006	Rejected	Rejected
Q9UHV9	Prefoldin subunit 2 [OS=Homo sapiens]	5.14839	0.995	2.66403	2.87529	0.927	3.35377	0.00736218	0.0206355	Enriched	Rejected
Q15631-1	Translin [OS=Homo sapiens]	3.04517	0.902	3.27954	4.92215	0.927	5.28729	0.0221563	0.0206704	Rejected	Rejected
Q96S52	GPI transamidase component PIG-S [OS=Homo sapiens]	2.18496	0.765	2.76412	1.9912	0.927	2.14929	0.0351361	0.0207053	Rejected	Rejected
O15160	DNA-directed RNA polymerases I and III subunit RPAC1 [OS=Homo sapiens]	1.07108	0.7	1.27815	2.7383	0.927	2.96307	0.039672	0.0207402	Rejected	Rejected
P16615	Sarcoplasmic/endoplasmic reticulum calcium ATPase 2 [OS=Homo sapiens]	5.68578	0.657	18.4312	3.12147	0.927	3.5504	0.0424285	0.0207751	Rejected	Rejected
Q15369-1	Transcription elongation factor B polypeptide 1 [OS=Homo sapiens]	9.34801	0.997	4.62829	3.65677	0.926	4.03198	0.00603629	0.0208101	Enriched	Rejected
Q8TDB6-1	E3 ubiquitin-protein ligase DTX3L [OS=Homo sapiens]	1.43186	0.67	2.85211	2.15149	0.926	2.25431	0.0416957	0.020845	Rejected	Rejected
P52732	Kinesin-like protein KIF11 [OS=Homo sapiens]	0.906997	0.302	1.29379	1.32848	0.926	1.38189	0.0647592	0.0208799	Rejected	Rejected
Q14566	DNA replication licensing factor MCM6 [OS=Homo sapiens]	4.4074	0.969	3.81098	2.12955	0.925	2.25677	0.0138521	0.0209148	Rejected	Rejected
Q13123	Protein Red [OS=Homo sapiens]	1.21634	0.862	1.34579	1.31377	0.925	1.37406	0.0261689	0.0209497	Rejected	Rejected
P62851	40S ribosomal protein S25 [OS=Homo sapiens]	0.525594	0.086	2.31682	1.94063	0.925	2.13792	0.076134	0.0209846	Rejected	Rejected
P00450	Ceruloplasmin [OS=Homo sapiens]	2.02855	0.997	1.59026	1.39295	0.924	1.44487	0.00614096	0.0210196	Enriched	Rejected
Q99733-2	Isoform 2 of Nucleosome assembly protein 1-like 4 [OS=Homo sapiens]	2.01302	0.871	2.4165	1.9966	0.924	2.10535	0.0252268	0.0210545	Rejected	Rejected
Q5JTZ9	alanine--tRNA ligase, mitochondrial [OS=Homo sapiens]	0.966815	0.436	1.4939	1.28988	0.924	1.34593	0.0573273	0.0210894	Rejected	Rejected
P15927-3	Isoform 3 of Replication protein A 32 kDa subunit [OS=Homo sapiens]	0.903425	0.321	1.43661	1.22327	0.924	1.26072	0.0637823	0.0211243	Rejected	Rejected
Q9BTW9-4	Isoform 4 of Tubulin-specific chaperone D [OS=Homo sapiens]	6.65775	0.998	3.52896	3.08991	0.923	3.29202	0.00558269	0.0211592	Enriched	Rejected
P68366	Tubulin alpha-4A chain [OS=Homo sapiens]	11.7867	0.914	16.3406	2.08723	0.923	2.41024	0.0210747	0.0211941	Rejected	Rejected
Q14152	Eukaryotic translation initiation factor 3 subunit A [OS=Homo sapiens]	1.35797	0.773	2.08046	2.13543	0.923	2.46024	0.0343685	0.0212291	Rejected	Rejected
P46013	Antigen KI-67 [OS=Homo sapiens]	1.21237	0.728	1.42918	1.39305	0.922	1.45502	0.0373692	0.021264	Rejected	Rejected
P04792	Heat shock protein beta-1 [OS=Homo sapiens]	1.18278	0.627	2.34614	3.43514	0.922	3.76861	0.0446964	0.0212989	Rejected	Rejected
Q9BPW8	Protein NipSnap homolog 1 [OS=Homo sapiens]	1.04417	0.603	1.40718	2.15045	0.922	2.25787	0.0467551	0.0213338	Rejected	Rejected
P30533	alpha-2-macroglobulin receptor-associated protein [OS=Homo sapiens]	0.846411	0.218	1.41351	1.31285	0.922	1.36386	0.0691905	0.0213687	Rejected	Rejected
Q16740	ATP-dependent Clp protease proteolytic subunit, mitochondrial [OS=Homo sapiens]	1.02501	0.565	1.32246	1.30693	0.921	1.35709	0.0497906	0.0214036	Rejected	Rejected
O95573	long-chain-fatty-acid--CoA ligase 3 [OS=Homo sapiens]	1.97334	0.986	1.78028	1.82824	0.92	1.94266	0.0102233	0.0214385	Rejected	Rejected
Q9NX40	OCIA domain-containing protein 1 [OS=Homo sapiens]	7.22534	0.94	7.28406	8.41376	0.92	9.21647	0.0180391	0.0214735	Rejected	Rejected
Q99497	Protein deglycase DJ-1 [OS=Homo sapiens]	1.78963	0.92	1.88036	3.1032	0.92	3.42557	0.0202024	0.0215084	Rejected	Rejected
Q9BR76	Coronin-1B [OS=Homo sapiens]	1.05976	0.603	1.53334	1.43298	0.92	1.50729	0.0466853	0.0215433	Rejected	Rejected
Q96AC1-3	Isoform 3 of Fermitin family homolog 2 [OS=Homo sapiens]	0.935057	0.455	2.95247	3.24785	0.92	4.02754	0.0563852	0.0215782	Rejected	Rejected
Q86U42-1	polyadenylate-binding protein 2 [OS=Homo sapiens]	0.37945	0.164	4.40882	3.24627	0.92	3.72711	0.0715283	0.0216131	Rejected	Rejected
Q8TCT9-1	Minor histocompatibility antigen H13 [OS=Homo sapiens]	3.25463	0.947	3.26512	2.99833	0.919	4.7495	0.0170272	0.021648	Rejected	Rejected
Q8NFH3	Nucleoporin Nup43 [OS=Homo sapiens]	0.870627	0.27	1.41291	1.4354	0.919	1.51451	0.0663992	0.021683	Rejected	Rejected
O75116	Rho-associated protein kinase 2 [OS=Homo sapiens]	6.1199	0.969	5.52813	2.63998	0.918	3.03461	0.0139567	0.0217179	Rejected	Rejected
O15144	Actin-related protein 2/3 complex subunit 2 [OS=Homo sapiens]	3.31074	0.535	4.24919	1.38163	0.918	1.46393	0.0517097	0.0217528	Rejected	Rejected
P53634-1	Dipeptidyl peptidase 1 [OS=Homo sapiens]	0.97057	0.443	1.48588	1.5116	0.918	1.57986	0.0569784	0.0217877	Rejected	Rejected
P50479-1	PDZ and LIM domain protein 4 [OS=Homo sapiens]	1.45577	0.998	1.25905	1.32122	0.917	1.38168	0.00551291	0.0218226	Enriched	Rejected
P60842	Eukaryotic initiation factor 4A-I [OS=Homo sapiens]	2.49979	0.997	1.88969	1.84411	0.917	1.99109	0.00568737	0.0218575	Enriched	Rejected
P11586	C-1-tetrahydrofolate synthase, cytoplasmic [OS=Homo sapiens]	1.82305	0.94	1.85646	1.70674	0.917	1.84912	0.0178646	0.0218925	Rejected	Rejected
Q6P2Q9	Pre-mRNA-processing-splicing factor 8 [OS=Homo sapiens]	0.670009	0.406	3.05469	2.14134	0.917	2.75333	0.0586881	0.0219274	Rejected	Rejected
Q9BV38	WD repeat-containing protein 18 [OS=Homo sapiens]	0.875388	0.316	1.61136	1.24979	0.917	1.29077	0.0641312	0.0219623	Rejected	Rejected
Q15370	Transcription elongation factor B polypeptide 2 [OS=Homo sapiens]	0.816619	0.109	1.31293	1.21658	0.917	1.25317	0.0747732	0.0219972	Rejected	Rejected
P46459	Vesicle-fusing ATPase [OS=Homo sapiens]	3.91464	0.996	2.39699	3.30451	0.916	4.69858	0.00662945	0.0220321	Enriched	Rejected
Q14696	LDLR chaperone MESD [OS=Homo sapiens]	1.88117	0.921	2.07304	1.76287	0.916	2.009	0.0201675	0.022067	Rejected	Rejected
Q32P41	tRNA (guanine(37)-N1)-methyltransferase [OS=Homo sapiens]	1.67226	0.85	1.98153	1.4286	0.916	1.50449	0.0275994	0.022102	Rejected	Rejected
P50995	annexin A11 [OS=Homo sapiens]	1.20568	0.718	1.50329	1.62891	0.916	1.7905	0.0381368	0.0221369	Rejected	Rejected
P08133-1	annexin A6 [OS=Homo sapiens]	1.59322	0.829	2.27482	2.11921	0.915	2.40831	0.0294138	0.0221718	Rejected	Rejected
Q8TAT6-2	Isoform 2 of Nuclear protein localization protein 4 homolog [OS=Homo sapiens]	1.43124	0.631	2.73391	3.14374	0.915	4.11889	0.0441731	0.0222067	Rejected	Rejected
O15479	Melanoma-associated antigen B2 [OS=Homo sapiens]	1.11814	0.605	1.72565	1.86274	0.915	2.03355	0.046441	0.0222416	Rejected	Rejected
P07910-2	Isoform C1 of Heterogeneous nuclear ribonucleoproteins C1/C2 [OS=Homo sapiens]	1.11607	0.827	1.18748	1.2958	0.914	1.34469	0.029693	0.0222765	Rejected	Rejected
Q14195-2	Isoform LCRMP-4 of Dihydropyrimidinase-related protein 3 [OS=Homo sapiens]	1.34087	0.751	1.86806	2.50374	0.914	2.92644	0.0359386	0.0223115	Rejected	Rejected
O95218-1	Zinc finger Ran-binding domain-containing protein 2 [OS=Homo sapiens]	0.839695	0.264	1.57197	1.30527	0.914	1.35915	0.0668876	0.0223464	Rejected	Rejected
P49755	Transmembrane emp24 domain-containing protein 10 [OS=Homo sapiens]	1.1331	0.785	1.30676	2.27464	0.913	2.32759	0.0330077	0.0223813	Rejected	Rejected
O94760-1	N(G),N(G)-dimethylarginine dimethylaminohydrolase 1 [OS=Homo sapiens]	0.640918	0.082	1.63753	2.78701	0.913	2.92338	0.0763782	0.0224162	Rejected	Rejected
Q1KMD3	heterogeneous nuclear ribonucleoprotein U-like protein 2 [OS=Homo sapiens]	1.886	0.91	2.16135	2.32419	0.912	2.70866	0.0214236	0.0224511	Rejected	Rejected
P51991-1	Heterogeneous nuclear ribonucleoprotein A3 [OS=Homo sapiens]	0.668983	0.289	2.55656	2.59258	0.912	2.8838	0.0653175	0.022486	Rejected	Rejected
O15067	Phosphoribosylformylglycinamidine synthase [OS=Homo sapiens]	0.622794	0.268	3.35626	1.41795	0.912	1.53182	0.0664341	0.0225209	Rejected	Rejected
Q71U36	tubulin alpha-1A chain [OS=Homo sapiens]	0.650636	0.173	1.97692	1.91146	0.912	2.20868	0.0710398	0.0225559	Rejected	Rejected
Q709C8	Vacuolar protein sorting-associated protein 13C [OS=Homo sapiens]	1.76143	0.962	1.71548	1.42354	0.911	1.54425	0.0151082	0.0225908	Rejected	Rejected
Q9NUQ9	protein FAM49B [OS=Homo sapiens]	4.5999	0.948	4.61523	2.15388	0.911	2.59217	0.0169225	0.0226257	Rejected	Rejected
Q8WVB6-2	Isoform 2 of Chromosome transmission fidelity protein 18 homolog [OS=Homo sapiens]	1.09133	0.805	1.18117	1.3157	0.911	1.39535	0.031298	0.0226606	Rejected	Rejected
Q96FW1	Ubiquitin thioesterase otub1 [OS=Homo sapiens]	1.88647	0.676	3.24145	3.94696	0.911	4.28094	0.0412421	0.0226955	Rejected	Rejected
Q6P2E9-1	Enhancer of mRNA-decapping protein 4 [OS=Homo sapiens]	4.15799	0.668	5.24738	1.48186	0.911	1.57492	0.0418004	0.0227304	Rejected	Rejected
Q15691	Microtubule-associated protein RP/EB family member 1 [OS=Homo sapiens]	0.519399	0.549	6.96976	1.91026	0.911	2.15624	0.0510119	0.0227654	Rejected	Rejected
Q96AX1	Vacuolar protein sorting-associated protein 33A [OS=Homo sapiens]	0.976393	0.457	1.35055	1.32191	0.911	1.39716	0.0562456	0.0228003	Rejected	Rejected
Q9C0C2	182 kDa tankyrase-1-binding protein [OS=Homo sapiens]	3.9259	0.973	2.80811	2.75073	0.91	3.38297	0.0132938	0.0228352	Rejected	Rejected
P08559-4	Isoform 4 of Pyruvate dehydrogenase E1 component subunit alpha, somatic form, mitochondrial [OS=Homo sapiens]	3.12157	0.94	3.26779	3.02313	0.91	3.4561	0.0180042	0.0228701	Rejected	Rejected
P09455-1	Retinol-binding protein 1 [OS=Homo sapiens]	1.9079	0.778	2.55567	2.32991	0.91	2.78843	0.0339149	0.022905	Rejected	Rejected
Q9BSJ8-2	Isoform 2 of Extended synaptotagmin-1 [OS=Homo sapiens]	1.18826	0.552	4.11575	3.48202	0.91	3.80701	0.0506629	0.0229399	Rejected	Rejected
P27348	14-3-3 protein theta [OS=Homo sapiens]	2.00517	0.976	1.82247	1.62167	0.909	1.76181	0.0125262	0.0229749	Rejected	Rejected
Q15365	Poly(RC)-binding protein 1 [OS=Homo sapiens]	1.63609	0.976	1.5522	1.65276	0.909	1.83442	0.0125611	0.0230098	Rejected	Rejected
Q14919-2	Isoform 2 of Dr1-associated corepressor [OS=Homo sapiens]	1.18507	0.885	1.2616	1.28477	0.909	1.35804	0.0241103	0.0230447	Rejected	Rejected
Q7L576-1	cytoplasmic FMR1-interacting protein 1 [OS=Homo sapiens]	1.35491	0.675	2.20612	4.62845	0.909	5.24393	0.0413468	0.0230796	Rejected	Rejected
Q32P28-3	Isoform 3 of Prolyl 3-hydroxylase 1 [OS=Homo sapiens]	1.44584	0.888	1.60418	1.28587	0.908	1.35001	0.0237613	0.0231145	Rejected	Rejected
P62805	histone H4 [OS=Homo sapiens]	2.99542	0.768	4.06721	1.36823	0.908	1.4481	0.0349616	0.0231494	Rejected	Rejected
P41227-1	N-alpha-acetyltransferase 10 [OS=Homo sapiens]	0.740872	0.092	1.44039	1.4773	0.907	1.63623	0.0756455	0.0231844	Rejected	Rejected
P38919	Eukaryotic initiation factor 4A-III [OS=Homo sapiens]	1.44828	0.789	2.05942	2.25583	0.906	2.46325	0.0324843	0.0232193	Rejected	Rejected
P84098	60S ribosomal protein L19 [OS=Homo sapiens]	1.09232	0.651	1.41714	1.28287	0.906	1.37344	0.0428821	0.0232542	Rejected	Rejected
P49841-2	Isoform 2 of Glycogen synthase kinase-3 beta [OS=Homo sapiens]	0.912403	0.398	1.59999	1.36522	0.906	1.45523	0.0595255	0.0232891	Rejected	Rejected
Q9BUJ2-1	Heterogeneous nuclear ribonucleoprotein U-like protein 1 [OS=Homo sapiens]	0.455022	0.155	3.13625	4.66918	0.906	15.4831	0.0720865	0.023324	Rejected	Rejected
Q5T750	Skin-specific protein 32 [OS=Homo sapiens]	0.688341	0.12	1.63637	1.87244	0.906	2.19395	0.0743545	0.0233589	Rejected	Rejected
Q6NZI2-1	polymerase I and transcript release factor [OS=Homo sapiens]	2.86686	0.998	1.89974	1.56321	0.905	1.66136	0.00516399	0.0233939	Enriched	Rejected
O60264	SWI/SNF-related matrix-associated actin-dependent regulator of chromatin subfamily A member 5 [OS=Homo sapiens]	2.04575	0.95	2.0424	2.07122	0.905	2.57749	0.0166434	0.0234288	Rejected	Rejected
P56537-1	eukaryotic translation initiation factor 6 [OS=Homo sapiens]	1.74273	0.895	2.02507	1.38389	0.905	1.43866	0.0228542	0.0234637	Rejected	Rejected
P62753	40S RIBOSOMAL PROTEIN S6 [OS=Homo sapiens]	1.53606	0.892	1.75953	1.25784	0.905	1.30537	0.0234124	0.0234986	Rejected	Rejected
Q9NZB2-6	Isoform F of Constitutive coactivator of PPAR-gamma-like protein 1 [OS=Homo sapiens]	1.29404	0.837	1.54874	1.41425	0.905	1.52005	0.028716	0.0235335	Rejected	Rejected
Q7Z3K3-1	Pogo transposable element with ZNF domain [OS=Homo sapiens]	0.706717	0.068	1.5466	1.40075	0.905	1.53151	0.0770412	0.0235684	Rejected	Rejected
P21926	CD9 antigen [OS=Homo sapiens]	11.0332	1	8.44266	2.01936	0.904	2.46662	0.00275645	0.0236034	Enriched	Rejected
P25311	Zinc-alpha-2-glycoprotein [OS=Homo sapiens]	1.85866	1	1.45562	1.61446	0.904	1.83208	0.00415213	0.0236383	Enriched	Rejected
P51114-1	Fragile X mental retardation syndrome-related protein 1 [OS=Homo sapiens]	2.05548	0.942	2.07852	2.81378	0.904	3.15383	0.0176204	0.0236732	Rejected	Rejected
Q9ULT8	E3 ubiquitin-protein ligase hectd1 [OS=Homo sapiens]	1.2423	0.845	1.41604	1.3511	0.904	1.45535	0.0279135	0.0237081	Rejected	Rejected
Q5T6F2	Ubiquitin-associated protein 2 [OS=Homo sapiens]	1.30206	0.807	1.57448	1.54809	0.904	1.8464	0.0310886	0.023743	Rejected	Rejected
P62829	60S ribosomal protein L23 [OS=Homo sapiens]	1.8306	0.656	4.43188	1.50518	0.904	1.66966	0.0425331	0.0237779	Rejected	Rejected
P26373-1	60S ribosomal protein L13 [OS=Homo sapiens]	1.08382	0.627	1.45001	1.35296	0.903	1.43459	0.0447313	0.0238128	Rejected	Rejected
Q9NY12-1	H/ACA ribonucleoprotein complex subunit 1 [OS=Homo sapiens]	0.878441	0.145	1.1766	2.54274	0.903	2.78207	0.0727495	0.0238478	Rejected	Rejected
P49790-3	Isoform 3 of Nuclear pore complex protein Nup153 [OS=Homo sapiens]	2.33538	0.853	2.61619	1.3993	0.902	1.56147	0.0272156	0.0238827	Rejected	Rejected
Q15517	corneodesmosin [OS=Homo sapiens]	0.846265	0.395	1.60649	2.78185	0.902	3.31318	0.0597697	0.0239176	Rejected	Rejected
P56385	ATP synthase subunit e, mitochondrial [OS=Homo sapiens]	0.797052	0.118	1.36801	1.35024	0.902	1.4522	0.0744941	0.0239525	Rejected	Rejected
P55060-1	Exportin-2 [OS=Homo sapiens]	3.80473	0.996	2.16281	1.75616	0.901	2.02462	0.00638521	0.0239874	Enriched	Rejected
P05090	apolipoprotein D [OS=Homo sapiens]	1.89349	0.829	2.34668	3.45196	0.901	4.33124	0.0295534	0.0240223	Rejected	Rejected
Q15274	nicotinate-nucleotide pyrophosphorylase [carboxylating] [OS=Homo sapiens]	1.84958	0.812	2.14228	2.07122	0.901	2.31796	0.0307397	0.0240573	Rejected	Rejected
P82933	28S ribosomal protein S9, mitochondrial [OS=Homo sapiens]	1.11917	0.684	1.49919	1.23836	0.901	1.32349	0.0406839	0.0240922	Rejected	Rejected
O43447	peptidyl-prolyl cis-trans isomerase H [OS=Homo sapiens]	1.10473	0.68	1.41514	1.23998	0.901	1.33764	0.0409281	0.0241271	Rejected	Rejected
O95232-1	Luc7-like protein 3 [OS=Homo sapiens]	0.718591	0.056	1.4125	1.3492	0.901	1.46044	0.0778088	0.024162	Rejected	Rejected
Q9NVP2	Histone chaperone ASF1B [OS=Homo sapiens]	1.99032	0.999	1.53207	1.20705	0.9	1.26337	0.00491975	0.0241969	Enriched	Rejected
Q13895	Bystin [OS=Homo sapiens]	1.17432	0.674	1.79826	1.35335	0.9	1.4359	0.0415213	0.0242318	Rejected	Rejected
Q99714-1	3-hydroxyacyl-CoA dehydrogenase type-2 [OS=Homo sapiens]	0.587782	0.09	1.84721	2.26193	0.899	4.9785	0.0757502	0.0242668	Rejected	Rejected
Q5MIZ7-1	Serine/threonine-protein phosphatase 4 regulatory subunit 3B [OS=Homo sapiens]	1.00479	0.512	1.56027	1.30694	0.898	1.42174	0.0530356	0.0243017	Rejected	Rejected
Q9GZS3	WD repeat-containing protein 61 [OS=Homo sapiens]	0.943259	0.379	1.4502	1.25984	0.898	1.32926	0.0606071	0.0243366	Rejected	Rejected
Q9BVJ6-1	U3 small nucleolar RNA-associated protein 14 homolog A [OS=Homo sapiens]	0.802491	0.132	1.32957	1.25894	0.898	1.35541	0.0736916	0.0243715	Rejected	Rejected
Q92620	Pre-mRNA-splicing factor ATP-dependent RNA helicase PRP16 [OS=Homo sapiens]	1.16159	0.725	1.51321	1.31046	0.897	1.41651	0.0377181	0.0244064	Rejected	Rejected
P35613	Basigin [OS=Homo sapiens]	1.14581	0.797	1.28119	2.39259	0.896	2.5454	0.0317865	0.0244413	Rejected	Rejected
Q06203	amidophosphoribosyltransferase [OS=Homo sapiens]	1.97449	0.775	2.40413	1.63149	0.896	1.75985	0.034194	0.0244763	Rejected	Rejected
Q13155	aminoacyl tRNA synthase complex-interacting multifunctional protein 2 [OS=Homo sapiens]	4.4449	0.961	4.20858	3.56372	0.895	4.71085	0.0152826	0.0245112	Rejected	Rejected
Q86SJ6-2	Isoform 2 of Desmoglein-4 [OS=Homo sapiens]	0.825014	0.139	1.31738	1.34066	0.895	1.4515	0.0730635	0.0245461	Rejected	Rejected
P06753-2	Isoform 2 of Tropomyosin alpha-3 chain [OS=Homo sapiens]	5.14614	0.993	3.1541	2.35645	0.894	2.68954	0.00792045	0.024581	Enriched	Rejected
Q9NYH9	U3 small nucleolar RNA-associated protein 6 homolog [OS=Homo sapiens]	1.14854	0.682	1.71826	1.80505	0.894	1.96361	0.0408234	0.0246159	Rejected	Rejected
P62280	40S ribosomal protein S11 [OS=Homo sapiens]	0.696328	0.374	2.62701	1.35033	0.894	1.46697	0.0608863	0.0246508	Rejected	Rejected
P27695	DNA-(apurinic or apyrimidinic site) lyase [OS=Homo sapiens]	2.23369	0.945	2.2868	2.00452	0.893	2.64281	0.0172366	0.0246858	Rejected	Rejected
P50570-1	Dynamin-2 [OS=Homo sapiens]	1.26127	0.841	1.44483	1.40272	0.893	1.5447	0.0282624	0.0247207	Rejected	Rejected
Q96NL8	protein C8orf37 [OS=Homo sapiens]	2.18572	0.984	1.97841	2.00981	0.892	2.49394	0.0109211	0.0247556	Rejected	Rejected
Q92616	eIF-2-alpha kinase activator GCN1 [OS=Homo sapiens]	2.15635	0.924	2.2624	1.70146	0.892	2.21028	0.0196092	0.0247905	Rejected	Rejected
A6NHR9-1	structural maintenance of chromosomes flexible hinge domain-containing protein 1 [OS=Homo sapiens]	1.45011	0.821	1.9581	1.72586	0.892	1.85553	0.0300768	0.0248254	Rejected	Rejected
Q92791	synaptonemal complex protein SC65 [OS=Homo sapiens]	2.56069	0.757	59.9637	3.50114	0.891	4.49587	0.0356595	0.0248603	Rejected	Rejected
Q07065	Cytoskeleton-associated protein 4 [OS=Homo sapiens]	0.805015	0.266	1.73503	1.54489	0.891	1.6543	0.0667132	0.0248953	Rejected	Rejected
Q15393-1	Splicing factor 3B subunit 3 [OS=Homo sapiens]	3.19919	0.995	2.16799	2.35587	0.89	3.05861	0.00694348	0.0249302	Enriched	Rejected
P47914	60S ribosomal protein L29 [OS=Homo sapiens]	3.31764	0.994	2.21476	1.53321	0.89	1.78819	0.00774599	0.0249651	Enriched	Rejected
P62873	Guanine nucleotide-binding protein G(I)/G(S)/G(T) subunit beta-1 [OS=Homo sapiens]	2.33301	0.785	3.31272	2.9239	0.89	4.89576	0.0329728	0.025	Rejected	Rejected
Q04917	14-3-3 protein eta [OS=Homo sapiens]	4.42793	0.968	4.00334	2.17092	0.889	2.7111	0.0140265	0.0250349	Rejected	Rejected
P98175-1	RNA-binding protein 10 [OS=Homo sapiens]	1.87749	0.95	1.8778	1.38705	0.889	1.56068	0.0166783	0.0250698	Rejected	Rejected
Q13162	Peroxiredoxin-4 [OS=Homo sapiens]	1.26114	0.9	1.34748	1.56335	0.889	1.82603	0.0224355	0.0251047	Rejected	Rejected
Q14019	coactosin-like protein [OS=Homo sapiens]	1.20909	0.778	1.468	1.89256	0.889	2.14661	0.0339498	0.0251397	Rejected	Rejected
Q15050	Ribosome biogenesis regulatory protein homolog [OS=Homo sapiens]	2.05953	0.641	2.33643	2.47912	0.889	2.74767	0.043545	0.0251746	Rejected	Rejected
P15170-3	Isoform 3 of Eukaryotic peptide chain release factor GTP-binding subunit ERF3A [OS=Homo sapiens]	4.58662	0.997	3.73115	2.70643	0.888	2.9716	0.0059665	0.0252095	Enriched	Rejected
Q13242	serine/arginine-rich splicing factor 9 [OS=Homo sapiens]	5.61049	0.945	5.77267	2.55879	0.888	3.91096	0.0172715	0.0252444	Rejected	Rejected
P20339	Ras-related protein Rab-5A [OS=Homo sapiens]	32.6312	0.839	57.5689	25.8587	0.888	37.3729	0.0285764	0.0252793	Rejected	Rejected
P62841	40S ribosomal protein S15 [OS=Homo sapiens]	1.68858	0.734	3.59159	2.54645	0.888	3.25	0.0368807	0.0253142	Rejected	Rejected
Q96EY7-1	pentatricopeptide repeat domain-containing protein 3, mitochondrial [OS=Homo sapiens]	1.22968	0.732	1.79218	1.36694	0.888	1.52969	0.03709	0.0253492	Rejected	Rejected
O60888-2	Isoform A of Protein CutA [OS=Homo sapiens]	1.11317	0.699	1.36699	1.39393	0.888	1.55548	0.0397418	0.0253841	Rejected	Rejected
P29218-3	Isoform 3 of Inositol monophosphatase 1 [OS=Homo sapiens]	2.41194	0.596	3.09929	1.88456	0.888	2.15477	0.0473831	0.025419	Rejected	Rejected
Q13685	angio-associated migratory cell protein [OS=Homo sapiens]	1.02861	0.584	1.43866	1.26542	0.888	1.34895	0.0481507	0.0254539	Rejected	Rejected
P48556	26S proteasome non-ATPase regulatory subunit 8 [OS=Homo sapiens]	0.267241	0.247	5.44387	1.69285	0.888	2.01228	0.0677948	0.0254888	Rejected	Rejected
P83731	60S ribosomal protein L24 [OS=Homo sapiens]	1.34725	0.943	1.3645	1.30295	0.887	1.39873	0.0175157	0.0255237	Rejected	Rejected
P49588	Alanine--tRNA ligase, cytoplasmic [OS=Homo sapiens]	1.67359	0.843	1.92912	1.50296	0.887	1.69546	0.0280879	0.0255587	Rejected	Rejected
O75131	Copine-3 [OS=Homo sapiens]	4.55684	0.772	6.16394	2.37923	0.887	4.91979	0.034508	0.0255936	Rejected	Rejected
P54886	delta-1-pyrroline-5-carboxylate synthase [OS=Homo sapiens]	6.2787	0.992	4.93663	5.59431	0.886	6.59583	0.00819958	0.0256285	Enriched	Rejected
Q9UBB4-1	Ataxin-10 [OS=Homo sapiens]	4.51816	0.987	3.52847	1.28687	0.886	1.36604	0.00997906	0.0256634	Rejected	Rejected
Q14103	heterogeneous nuclear ribonucleoprotein D0 [OS=Homo sapiens]	1.81982	0.833	2.29809	3.14337	0.886	3.75836	0.0288904	0.0256983	Rejected	Rejected
O00231-2	Isoform 2 of 26S proteasome non-ATPase regulatory subunit 11 [OS=Homo sapiens]	3.56587	0.996	2.51149	1.30023	0.885	1.43066	0.00659456	0.0257332	Enriched	Rejected
O95983-1	methyl-CpG-binding domain protein 3 [OS=Homo sapiens]	4.14802	0.512	6.01438	6.76454	0.885	7.17975	0.0530007	0.0257682	Rejected	Rejected
Q96P63-2	Isoform 2 of Serpin B12 [OS=Homo sapiens]	0.807606	0.338	1.71789	2.10966	0.885	2.56124	0.0631193	0.0258031	Rejected	Rejected
Q9Y263	Phospholipase A-2-activating protein [OS=Homo sapiens]	0.770917	0.156	1.48856	1.31995	0.885	1.43657	0.0719819	0.025838	Rejected	Rejected
P49257	Protein ERGIC-53 [OS=Homo sapiens]	3.97413	0.999	2.27793	2.08776	0.884	2.48884	0.00478018	0.0258729	Enriched	Rejected
P33991	DNA replication licensing factor MCM4 [OS=Homo sapiens]	6.34935	0.984	4.81777	2.90279	0.884	7.11886	0.0107467	0.0259078	Rejected	Rejected
P54920	alpha-soluble nsf attachment protein [OS=Homo sapiens]	3.19012	0.807	6.05512	2.14977	0.883	2.31375	0.0310188	0.0259427	Rejected	Rejected
P07226-1	Tropomyosin alpha-4 chain [OS=Homo sapiens]	1.57133	0.475	2.51507	2.33993	0.883	2.90031	0.0550942	0.0259777	Rejected	Rejected
Q9UIG0	Tyrosine-protein kinase BAZ1B [OS=Homo sapiens]	3.77443	0.987	2.81787	2.91972	0.882	3.63037	0.00987439	0.0260126	Rejected	Rejected
Q04637-9	Isoform 9 of Eukaryotic translation initiation factor 4 gamma 1 [OS=Homo sapiens]	2.98659	0.919	3.40991	3.3936	0.881	4.12759	0.0203768	0.0260475	Rejected	Rejected
Q01780	exosome component 10 [OS=Homo sapiens]	1.34787	0.75	2.36234	2.93897	0.881	3.41637	0.0360433	0.0260824	Rejected	Rejected
P62942	Peptidyl-prolyl cis-trans isomerase FKBP1A [OS=Homo sapiens]	1.13654	0.655	1.55709	2.77964	0.88	2.93455	0.0426378	0.0261173	Rejected	Rejected
P81605-2	Isoform 2 of Dermcidin [OS=Homo sapiens]	0.784583	0.286	1.59149	1.58768	0.88	2.00655	0.0656315	0.0261522	Rejected	Rejected
Q9H910-3	Isoform 3 of Hematological and neurological expressed 1-like protein [OS=Homo sapiens]	2.5322	0.996	1.77726	1.66461	0.879	2.00101	0.00666434	0.0261872	Enriched	Rejected
Q9NQG5	regulation of nuclear pre-mRNA domain-containing protein 1B [OS=Homo sapiens]	6.11058	0.862	7.01206	5.04998	0.879	5.56137	0.026134	0.0262221	Rejected	Rejected
Q9BS26	Endoplasmic reticulum resident protein 44 [OS=Homo sapiens]	2.19742	0.845	3.70004	4.36186	0.879	4.95731	0.0278786	0.026257	Rejected	Rejected
Q14116	Interleukin-18 [OS=Homo sapiens]	1.99621	0.778	3.07925	1.88112	0.879	2.29411	0.03388	0.0262919	Rejected	Rejected
Q52LJ0-2	Isoform 2 of Protein FAM98B [OS=Homo sapiens]	1.51479	0.575	2.13735	8.55937	0.879	9.13402	0.0489881	0.0263268	Rejected	Rejected
O15226-2	Isoform 2 of NF-kappa-B-repressing factor [OS=Homo sapiens]	1.49299	0.824	1.90359	3.21916	0.877	3.63624	0.0299372	0.0263617	Rejected	Rejected
Q69YN2-1	CWF19-like protein 1 [OS=Homo sapiens]	3.59395	0.802	4.19802	1.14801	0.877	1.21659	0.0315073	0.0263966	Rejected	Rejected
P60228	Eukaryotic translation initiation factor 3 subunit E [OS=Homo sapiens]	1.20655	0.717	1.42292	4.13741	0.877	4.61946	0.0382763	0.0264316	Rejected	Rejected
P14923	Junction plakoglobin [OS=Homo sapiens]	0.863739	0.286	1.60128	1.39144	0.877	1.61884	0.0655967	0.0264665	Rejected	Rejected
P49368-1	T-complex protein 1 subunit gamma [OS=Homo sapiens]	4.55354	1	2.29794	1.52439	0.876	1.83197	0.000732729	0.0265014	Enriched	Rejected
P05109	Protein S100-A8 [OS=Homo sapiens]	1.93931	1	1.56363	1.42585	0.876	1.72418	0.00373343	0.0265363	Enriched	Rejected
P07602-3	Isoform Sap-mu-9 of Prosaposin [OS=Homo sapiens]	5.24962	0.926	5.61062	76.927	0.876	83.8627	0.0194696	0.0265712	Rejected	Rejected
Q92820	Gamma-glutamyl hydrolase [OS=Homo sapiens]	2.75735	0.852	3.27058	1.31619	0.876	1.47171	0.0273901	0.0266061	Rejected	Rejected
Q9UMY4-1	Sorting nexin-12 [OS=Homo sapiens]	3.22653	0.97	3.08733	1.70184	0.874	2.07742	0.0138172	0.0266411	Rejected	Rejected
Q03252	Lamin-B2 [OS=Homo sapiens]	0.647287	0.247	2.16723	1.56637	0.874	1.84298	0.0677599	0.026676	Rejected	Rejected
Q9BRQ6	MICOS complex subunit mic25 [OS=Homo sapiens]	1.46288	0.986	1.37959	1.30802	0.873	1.44349	0.0102931	0.0267109	Rejected	Rejected
Q9HCY8	protein S100-A14 [OS=Homo sapiens]	1.756	0.977	1.5798	1.59372	0.873	1.94902	0.0124215	0.0267458	Rejected	Rejected
Q16527	Cysteine and glycine-rich protein 2 [OS=Homo sapiens]	1.81937	0.936	1.86446	1.41898	0.873	1.59881	0.0182833	0.0267807	Rejected	Rejected
O75964	ATP synthase subunit g, mitochondrial [OS=Homo sapiens]	1.72693	0.826	2.88439	2.12129	0.873	2.38676	0.0297976	0.0268156	Rejected	Rejected
Q9BTT0	Acidic leucine-rich nuclear phosphoprotein 32 family member E [OS=Homo sapiens]	0.712095	0.212	1.85337	1.21256	0.873	1.30872	0.0694696	0.0268506	Rejected	Rejected
Q9UJU6-3	Isoform 3 of Drebrin-like protein [OS=Homo sapiens]	5.23135	1	2.98383	2.17677	0.872	2.74986	0.00296581	0.0268855	Enriched	Rejected
Q8WWM7-3	Isoform 3 of Ataxin-2-like protein [OS=Homo sapiens]	1.94759	1	1.41573	1.27532	0.872	1.44257	0.00321005	0.0269204	Enriched	Rejected
O00469-2	Isoform 2 of Procollagen-lysine,2-oxoglutarate 5-dioxygenase 2 [OS=Homo sapiens]	1.43335	0.933	1.50247	1.1518	0.872	1.23683	0.0187369	0.0269553	Rejected	Rejected
O75695	Protein XRP2 [OS=Homo sapiens]	1.26199	0.769	1.62635	1.23532	0.872	1.34089	0.0349267	0.0269902	Rejected	Rejected
P48643	T-complex protein 1 subunit epsilon [OS=Homo sapiens]	1.2193	0.605	3.16605	9.06739	0.872	15.4827	0.0464061	0.0270251	Rejected	Rejected
Q9NYY8	FAST kinase domain-containing protein 2, mitochondrial [OS=Homo sapiens]	2.36514	0.994	1.74643	1.37032	0.871	1.51756	0.00785066	0.0270601	Enriched	Rejected
P35250-1	Replication factor C subunit 2 [OS=Homo sapiens]	3.28244	0.968	2.95714	2.16662	0.871	3.34846	0.0140963	0.027095	Rejected	Rejected
Q9P015	39S ribosomal protein L15, mitochondrial [OS=Homo sapiens]	1.5627	0.88	1.71202	1.14427	0.871	1.22455	0.0244592	0.0271299	Rejected	Rejected
Q8TEA8	D-tyrosyl-tRNA(Tyr) deacylase 1 [OS=Homo sapiens]	0.759363	0.127	1.44758	1.34883	0.871	1.53359	0.0741103	0.0271648	Rejected	Rejected
Q15149-4	Isoform 4 of Plectin [OS=Homo sapiens]	1.31445	0.9	1.42252	1.24499	0.87	1.38144	0.0223657	0.0271997	Rejected	Rejected
Q9P2R7	Succinyl-CoA ligase [ADP-forming] subunit beta, mitochondrial [OS=Homo sapiens]	1.03932	0.55	1.46368	1.75287	0.87	2.29456	0.0509421	0.0272346	Rejected	Rejected
Q9Y512	sorting and assembly machinery component 50 homolog [OS=Homo sapiens]	0.986496	0.438	1.29182	1.34025	0.87	1.52601	0.0571528	0.0272696	Rejected	Rejected
O43776	Asparagine--tRNA ligase, cytoplasmic [OS=Homo sapiens]	2.46695	0.999	1.8108	1.61964	0.869	1.97495	0.00464061	0.0273045	Enriched	Rejected
P61619	Protein transport protein Sec61 subunit alpha isoform 1 [OS=Homo sapiens]	2.97957	0.941	3.10812	1.61413	0.869	1.93486	0.0177948	0.0273394	Rejected	Rejected
O75153	Clustered mitochondria protein homolog [OS=Homo sapiens]	1.26833	0.865	1.40519	1.37941	0.869	1.57954	0.0258897	0.0273743	Rejected	Rejected
O60502	protein O-GlcNAcase [OS=Homo sapiens]	4.09992	0.819	4.55081	7.01925	0.869	7.59508	0.0302163	0.0274092	Rejected	Rejected
Q8NEZ5-1	F-box only protein 22 [OS=Homo sapiens]	1.28383	0.863	1.42411	1.31404	0.868	1.45468	0.0260642	0.0274441	Rejected	Rejected
Q05397-5	Isoform 5 of Focal adhesion kinase 1 [OS=Homo sapiens]	1.2806	0.897	1.39067	4.18377	0.867	6.34678	0.0226797	0.0274791	Rejected	Rejected
P04844-1	Dolichyl-diphosphooligosaccharide--protein glycosyltransferase subunit 2 [OS=Homo sapiens]	0.69743	0.292	3.11111	2.79567	0.866	3.66962	0.0651779	0.027514	Rejected	Rejected
Q15008	26S proteasome non-ATPase regulatory subunit 6 [OS=Homo sapiens]	1.03846	0.521	1.37158	1.9617	0.865	2.28457	0.0525122	0.0275489	Rejected	Rejected
P61923-4	Isoform 4 of Coatomer subunit zeta-1 [OS=Homo sapiens]	0.934712	0.285	1.2103	1.2569	0.865	1.39415	0.0656664	0.0275838	Rejected	Rejected
Q9Y5J1	U3 small nucleolar RNA-associated protein 18 homolog [OS=Homo sapiens]	0.855807	0.23	1.4134	1.27846	0.865	1.44638	0.068702	0.0276187	Rejected	Rejected
P10412	Histone H1.4 [OS=Homo sapiens]	0.739691	0.197	1.89348	2.09476	0.865	2.81933	0.0697837	0.0276536	Rejected	Rejected
P30044-1	Peroxiredoxin-5, mitochondrial [OS=Homo sapiens]	0.579941	0.163	2.31992	2.10417	0.865	2.67477	0.071598	0.0276885	Rejected	Rejected
Q9NP77	RNA polymerase II subunit A C-terminal domain phosphatase SSU72 [OS=Homo sapiens]	1.19563	0.942	1.20186	1.18098	0.864	1.24362	0.0177599	0.0277235	Rejected	Rejected
P22102-1	trifunctional purine biosynthetic protein adenosine-3 [OS=Homo sapiens]	1.65199	0.931	1.73736	1.40759	0.864	1.61595	0.0189463	0.0277584	Rejected	Rejected
Q13740-1	CD166 antigen [OS=Homo sapiens]	0.766432	0.151	1.46126	2.61042	0.864	3.10599	0.0722959	0.0277933	Rejected	Rejected
Q14CN4-1	Keratin, type II cytoskeletal 72 [OS=Homo sapiens]	1.22209	0.647	2.64684	2.91804	0.863	3.91225	0.0430565	0.0278282	Rejected	Rejected
Q9UNN5-1	fas-associated factor 1 [OS=Homo sapiens]	1.15462	0.589	1.61091	1.26696	0.862	1.37978	0.0478367	0.0278631	Rejected	Rejected
Q9NQX3-2	Isoform 2 of Gephyrin [OS=Homo sapiens]	0.989978	0.468	1.23006	1.37572	0.862	1.60068	0.0555129	0.027898	Rejected	Rejected
P49207	60S ribosomal protein L34 [OS=Homo sapiens]	1.11496	0.704	1.42193	1.21868	0.861	1.33914	0.039358	0.027933	Rejected	Rejected
Q13148-1	TAR DNA-binding protein 43 [OS=Homo sapiens]	1.95876	0.638	3.71746	1.72868	0.861	2.01058	0.0437195	0.0279679	Rejected	Rejected
P22392-2	Isoform 3 of Nucleoside diphosphate kinase B [OS=Homo sapiens]	0.608732	0.272	9.10255	4.32696	0.861	6.2131	0.0661549	0.0280028	Rejected	Rejected
P19338	Nucleolin [OS=Homo sapiens]	1.99563	0.983	1.7586	1.52274	0.86	1.85451	0.0110956	0.0280377	Rejected	Rejected
Q9Y2S6	Translation machinery-associated protein 7 [OS=Homo sapiens]	2.35823	0.97	2.0493	2.46341	0.86	2.77933	0.0137125	0.0280726	Rejected	Rejected
P06454-1	Prothymosin alpha [OS=Homo sapiens]	0.762454	0.424	1.86766	1.41137	0.86	1.65961	0.0578158	0.0281075	Rejected	Rejected
O15498	Synaptobrevin homolog YKT6 [OS=Homo sapiens]	0.879708	0.277	1.39189	1.34639	0.86	1.54845	0.0658758	0.0281425	Rejected	Rejected
P49006	MARCKS-related protein [OS=Homo sapiens]	0.71408	0.108	1.50458	1.22314	0.86	1.32377	0.0748081	0.0281774	Rejected	Rejected
P04632	Calpain small subunit 1 [OS=Homo sapiens]	3.965	0.978	3.27662	2.9609	0.859	5.09574	0.0120028	0.0282123	Rejected	Rejected
P50990	T-complex protein 1 subunit theta [OS=Homo sapiens]	1.43604	0.972	1.38901	3.4954	0.859	8.10628	0.0134682	0.0282472	Rejected	Rejected
Q9NZN4	EH domain-containing protein 2 [OS=Homo sapiens]	1.88164	0.896	2.02666	2.20683	0.859	2.34916	0.0227495	0.0282821	Rejected	Rejected
P30048	Thioredoxin-dependent peroxide reductase, mitochondrial [OS=Homo sapiens]	0.817545	0.415	3.04265	1.76191	0.859	2.36124	0.0582694	0.028317	Rejected	Rejected
P17858-1	ATP-dependent 6-phosphofructokinase, liver type [OS=Homo sapiens]	1.87556	0.825	2.14351	1.21971	0.858	1.31793	0.0298325	0.028352	Rejected	Rejected
O43264	Centromere/kinetochore protein zw10 homolog [OS=Homo sapiens]	0.846576	0.394	2.17898	2.92616	0.857	4.13359	0.0598046	0.0283869	Rejected	Rejected
O00116	Alkyldihydroxyacetonephosphate synthase, peroxisomal [OS=Homo sapiens]	0.594222	0.188	2.59817	1.83982	0.857	2.41767	0.0701326	0.0284218	Rejected	Rejected
P62266	40S ribosomal protein S23 [OS=Homo sapiens]	1.45785	0.963	1.42679	1.32654	0.854	1.53489	0.014829	0.0284567	Rejected	Rejected
Q14157-5	Isoform 5 of Ubiquitin-associated protein 2-like [OS=Homo sapiens]	1.58197	0.836	2.04914	1.40316	0.854	1.6092	0.0287509	0.0284916	Rejected	Rejected
Q9UNN8	Endothelial protein C receptor [OS=Homo sapiens]	0.807474	0.28	1.77827	1.32468	0.854	1.55679	0.0657711	0.0285265	Rejected	Rejected
Q9BSH4	Translational activator of cytochrome c oxidase 1 [OS=Homo sapiens]	0.813364	0.241	1.62034	1.22531	0.854	1.3433	0.0679693	0.0285615	Rejected	Rejected
P13667	Protein disulfide-isomerase A4 [OS=Homo sapiens]	2.70028	0.989	2.10654	1.49998	0.853	1.88243	0.00910677	0.0285964	Rejected	Rejected
P10253	lysosomal alpha-glucosidase [OS=Homo sapiens]	1.46384	0.878	1.65294	1.97328	0.853	2.94428	0.0246685	0.0286313	Rejected	Rejected
P46940	Ras GTPase-activating-like protein IQGAP1 [OS=Homo sapiens]	3.55149	0.837	5.32265	3.9334	0.852	5.37173	0.0286811	0.0286662	Rejected	Rejected
O60841	Eukaryotic translation initiation factor 5B [OS=Homo sapiens]	0.961192	0.425	1.33107	1.17133	0.852	1.28966	0.0577809	0.0287011	Rejected	Rejected
O76003	glutaredoxin-3 [OS=Homo sapiens]	0.372245	0.002	2.39771	1.40206	0.851	1.69087	0.0812282	0.028736	Rejected	Rejected
P14550	alcohol dehydrogenase [NADP(+)] [OS=Homo sapiens]	2.33069	0.918	2.45972	4.83733	0.85	5.99802	0.0205513	0.0287709	Rejected	Rejected
Q9UBM7	7-dehydrocholesterol reductase [OS=Homo sapiens]	1.02868	0.512	1.45431	1.20314	0.849	1.34043	0.0530705	0.0288059	Rejected	Rejected
Q96N66-1	Lysophospholipid acyltransferase 7 [OS=Homo sapiens]	0.954234	0.343	1.2088	1.30879	0.849	1.35734	0.0628053	0.0288408	Rejected	Rejected
P04179	Superoxide dismutase [Mn], mitochondrial [OS=Homo sapiens]	0.833498	0.296	1.91987	1.21325	0.849	1.35968	0.0650384	0.0288757	Rejected	Rejected
Q99986	Serine/threonine-protein kinase VRK1 [OS=Homo sapiens]	0.83275	0.194	1.32833	1.12178	0.849	1.20268	0.0698883	0.0289106	Rejected	Rejected
Q14764	major vault protein [OS=Homo sapiens]	3.09718	0.995	2.45843	1.90942	0.848	2.43742	0.00701326	0.0289455	Enriched	Rejected
Q9H993	protein-glutamate O-methyltransferase [OS=Homo sapiens]	0.744912	0.038	1.32894	1.33895	0.848	1.58591	0.0789602	0.0289804	Rejected	Rejected
Q13620	Cullin-4B [OS=Homo sapiens]	1.73933	0.969	1.66796	1.53889	0.847	1.85166	0.0139218	0.0290154	Rejected	Rejected
P61313-1	60S ribosomal protein L15 [OS=Homo sapiens]	1.31087	0.839	1.50605	1.29169	0.847	1.47546	0.0285066	0.0290503	Rejected	Rejected
Q9UIA9	exportin-7 [OS=Homo sapiens]	0.929518	0.371	1.39319	1.30731	0.847	1.47812	0.0611305	0.0290852	Rejected	Rejected
Q7Z4S6-4	Isoform 4 of Kinesin-like protein KIF21A [OS=Homo sapiens]	0.89414	0.235	1.26153	1.26882	0.847	1.4327	0.068388	0.0291201	Rejected	Rejected
Q6PKG0-1	La-related protein 1 [OS=Homo sapiens]	1.45494	0.792	1.93647	1.43243	0.846	1.6869	0.0322052	0.029155	Rejected	Rejected
P17931	Galectin-3 [OS=Homo sapiens]	1.08034	0.605	1.75434	1.55192	0.846	1.99878	0.0465108	0.0291899	Rejected	Rejected
O95202-1	LETM1 and EF-hand domain-containing protein 1, mitochondrial [OS=Homo sapiens]	0.998396	0.508	1.56099	1.22286	0.846	1.38869	0.0532449	0.0292249	Rejected	Rejected
Q13868	Exosome complex component Rrp4 [OS=Homo sapiens]	0.964088	0.459	1.63285	1.36285	0.846	1.54042	0.056141	0.0292598	Rejected	Rejected
O75475-1	PC4 and SFRS1-interacting protein [OS=Homo sapiens]	15891.6	1	459.375	2.70943	0.845	8.56519	0.00289602	0.0292947	Enriched	Rejected
P62913	60S ribosomal protein L11 [OS=Homo sapiens]	1.8723	0.931	2.0528	1.28026	0.844	1.50386	0.0190509	0.0293296	Rejected	Rejected
P07237	Protein disulfide-isomerase [OS=Homo sapiens]	1.66248	0.857	2.31184	1.6912	0.844	2.32268	0.0267969	0.0293645	Rejected	Rejected
Q8WXA9-2	Isoform 2 of Splicing regulatory glutamine/lysine-rich protein 1 [OS=Homo sapiens]	1.10712	0.529	6.22444	2.37759	0.844	3.84917	0.0521633	0.0293994	Rejected	Rejected
Q14160	protein scribble homolog [OS=Homo sapiens]	0.713347	0.061	1.42448	2.06161	0.844	2.24162	0.0774948	0.0294344	Rejected	Rejected
P36915-1	Guanine nucleotide-binding protein-like 1 [OS=Homo sapiens]	1.48379	0.805	1.90938	1.67454	0.842	2.49406	0.0312631	0.0294693	Rejected	Rejected
Q99471-1	prefoldin subunit 5 [OS=Homo sapiens]	0.930915	0.427	1.61371	1.8247	0.842	1.99673	0.0576064	0.0295042	Rejected	Rejected
P51570-2	Isoform 2 of Galactokinase [OS=Homo sapiens]	1.29452	0.707	1.99489	4.87975	0.841	6.79253	0.0392184	0.0295391	Rejected	Rejected
O43252	bifunctional 3'-phosphoadenosine 5'-phosphosulfate synthase 1 [OS=Homo sapiens]	1.47477	0.66	1.85823	1.77965	0.841	2.2916	0.0422191	0.029574	Rejected	Rejected
P17706-1	Tyrosine-protein phosphatase non-receptor type 2 [OS=Homo sapiens]	1.09432	0.656	1.41045	1.25588	0.841	1.59552	0.042568	0.0296089	Rejected	Rejected
A1L0T0	Acetolactate synthase-like protein [OS=Homo sapiens]	1.85182	0.988	1.59986	1.29176	0.84	1.55974	0.00966504	0.0296439	Rejected	Rejected
O60493-1	sorting nexin-3 [OS=Homo sapiens]	1.67589	0.991	1.45169	1.51185	0.839	2.07006	0.0085485	0.0296788	Rejected	Rejected
P08237-3	Isoform 3 of ATP-dependent 6-phosphofructokinase, muscle type [OS=Homo sapiens]	1.21196	0.607	1.69016	1.21849	0.839	1.39117	0.0462666	0.0297137	Rejected	Rejected
Q9Y3Y2-3	Isoform 2 of Chromatin target of PRMT1 protein [OS=Homo sapiens]	0.767876	0.246	2.0031	1.34713	0.839	1.58279	0.0678646	0.0297486	Rejected	Rejected
Q96SU4-6	Isoform 6 of Oxysterol-binding protein-related protein 9 [OS=Homo sapiens]	1.02767	0.602	1.21622	1.26012	0.838	1.4434	0.0468597	0.0297835	Rejected	Rejected
Q5VW32	BRO1 domain-containing protein BROX [OS=Homo sapiens]	6.66139	0.873	9.10292	3.09772	0.837	9.64952	0.0251221	0.0298184	Rejected	Rejected
Q9P121-4	Isoform 4 of Neurotrimin [OS=Homo sapiens]	1.19614	0.55	2.02118	2.19076	0.837	2.67929	0.0508723	0.0298534	Rejected	Rejected
P53396-1	ATP-citrate synthase [OS=Homo sapiens]	2.05619	0.962	1.99298	1.97555	0.836	2.52184	0.0149686	0.0298883	Rejected	Rejected
Q9NRG9-1	Aladin [OS=Homo sapiens]	1.18354	0.844	1.3095	1.33105	0.836	1.5939	0.0280181	0.0299232	Rejected	Rejected
P46108-1	Adapter molecule crk [OS=Homo sapiens]	1.70439	0.8	2.51596	1.8441	0.836	2.66452	0.0315771	0.0299581	Rejected	Rejected
Q14683	structural maintenance of chromosomes protein 1a [OS=Homo sapiens]	1.30049	0.791	1.65328	1.70781	0.836	2.30373	0.0323098	0.029993	Rejected	Rejected
Q00610-1	Clathrin heavy chain 1 [OS=Homo sapiens]	1.48204	0.814	2.0446	1.5175	0.835	2.02486	0.0305652	0.0300279	Rejected	Rejected
Q9GZL7	ribosome biogenesis protein WDR12 [OS=Homo sapiens]	0.944256	0.393	1.33071	1.36105	0.835	1.57298	0.0598395	0.0300628	Rejected	Rejected
P17612	cAMP-dependent protein kinase catalytic subunit alpha [OS=Homo sapiens]	1.97099	0.79	2.62425	2.66014	0.834	3.3991	0.0324494	0.0300978	Rejected	Rejected
Q03001-7	dystonin [OS=Homo sapiens]	1.17737	0.721	1.47959	1.25555	0.834	1.4641	0.0379274	0.0301327	Rejected	Rejected
Q96GG9	DCN1-like protein 1 [OS=Homo sapiens]	5.60717	0.571	10.7138	110.053	0.834	140.569	0.0492673	0.0301676	Rejected	Rejected
Q14739	Lamin-B receptor [OS=Homo sapiens]	1.06513	0.56	2.27842	1.26213	0.834	1.46755	0.0501047	0.0302025	Rejected	Rejected
Q16543	Hsp90 co-chaperone Cdc37 [OS=Homo sapiens]	0.905152	0.46	2.26776	1.57451	0.834	2.24771	0.0560712	0.0302374	Rejected	Rejected
P53801	pituitary tumor-transforming gene 1 protein-interacting protein [OS=Homo sapiens]	0.754309	0.194	1.85577	1.27518	0.834	1.47955	0.0699232	0.0302723	Rejected	Rejected
Q05519	serine/arginine-rich splicing factor 11 [OS=Homo sapiens]	2.14659	0.781	2.60598	3.14876	0.833	3.73933	0.0334613	0.0303073	Rejected	Rejected
P38159-1	RNA-binding motif protein, X chromosome [OS=Homo sapiens]	1.37264	0.634	3.22883	2.42863	0.833	3.03454	0.0439986	0.0303422	Rejected	Rejected
P02765	Alpha-2-HS-glycoprotein [OS=Homo sapiens]	0.304116	0.077	4.03467	2.83348	0.833	5.97022	0.0765876	0.0303771	Rejected	Rejected
P61353	60S ribosomal protein L27 [OS=Homo sapiens]	1.30712	0.691	3.79335	1.63988	0.832	2.18371	0.0401605	0.030412	Rejected	Rejected
P43686	26S protease regulatory subunit 6B [OS=Homo sapiens]	1.6004	0.905	1.81614	1.48224	0.831	1.95572	0.0218074	0.0304469	Rejected	Rejected
Q9UHD1	cysteine and histidine-rich domain-containing protein 1 [OS=Homo sapiens]	1.64311	0.817	2.25907	1.81788	0.831	3.67178	0.0303908	0.0304818	Rejected	Rejected
Q99873	protein arginine N-methyltransferase 1 [OS=Homo sapiens]	2.45097	0.989	2.10642	3.86262	0.83	5.24762	0.00914166	0.0305168	Rejected	Rejected
Q07021	Complement component 1 Q subcomponent-binding protein, mitochondrial [OS=Homo sapiens]	3.21679	0.972	2.95323	1.80905	0.83	2.49365	0.013538	0.0305517	Rejected	Rejected
Q8WVJ2	NudC domain-containing protein 2 [OS=Homo sapiens]	2.48961	0.963	2.42125	1.81174	0.83	2.77578	0.0148988	0.0305866	Rejected	Rejected
O75844	caax prenyl protease 1 homolog [OS=Homo sapiens]	1.25693	0.869	1.36891	1.50251	0.83	1.87346	0.0255408	0.0306215	Rejected	Rejected
P84095	Rho-related GTP-binding protein RhoG [OS=Homo sapiens]	6.08016	0.933	6.18727	1.86582	0.829	2.78826	0.0187718	0.0306564	Rejected	Rejected
P09543-1	2',3'-cyclic-nucleotide 3'-phosphodiesterase [OS=Homo sapiens]	1.3336	0.51	1.96325	1.34753	0.829	1.61057	0.0531752	0.0306913	Rejected	Rejected
Q9BUF5	Tubulin beta-6 chain [OS=Homo sapiens]	2.63052	0.985	2.1611	2.90706	0.828	3.79761	0.0103629	0.0307263	Rejected	Rejected
Q969H8	Myeloid-derived growth factor [OS=Homo sapiens]	1.20897	0.966	1.18792	1.22789	0.828	1.40267	0.0144801	0.0307612	Rejected	Rejected
P28070	Proteasome subunit beta type-4 [OS=Homo sapiens]	2.09467	0.848	2.94823	1.68839	0.828	2.22987	0.0277041	0.0307961	Rejected	Rejected
Q9NT62	ubiquitin-like-conjugating enzyme ATG3 [OS=Homo sapiens]	1.11144	0.708	1.3522	1.3114	0.828	1.69971	0.0390789	0.030831	Rejected	Rejected
Q99627-1	COP9 signalosome complex subunit 8 [OS=Homo sapiens]	0.938374	0.382	1.42561	1.43723	0.827	1.75331	0.0601884	0.0308659	Rejected	Rejected
Q9Y6W5	Wiskott-Aldrich syndrome protein family member 2 [OS=Homo sapiens]	5.80464	0.996	3.46841	2.15126	0.826	4.91694	0.00680391	0.0309008	Enriched	Rejected
Q9H4M9	EH domain-containing protein 1 [OS=Homo sapiens]	2.78084	0.952	2.77263	2.68045	0.826	4.09695	0.0162596	0.0309358	Rejected	Rejected
P01857	Ig gamma-1 chain C region [OS=Homo sapiens]	2.1041	0.899	2.41315	3.2152	0.826	7.52804	0.0226099	0.0309707	Rejected	Rejected
Q9NW64-1	Pre-mRNA-splicing factor RBM22 [OS=Homo sapiens]	0.927179	0.374	1.48682	1.37569	0.826	1.65275	0.060956	0.0310056	Rejected	Rejected
P30519	Heme oxygenase 2 [OS=Homo sapiens]	1.10978	0.641	1.66421	1.39383	0.825	1.79296	0.0435799	0.0310405	Rejected	Rejected
Q6UXN9	WD repeat-containing protein 82 [OS=Homo sapiens]	0.958947	0.437	1.36731	1.15191	0.825	1.34	0.0572575	0.0310754	Rejected	Rejected
Q09161	Nuclear cap-binding protein subunit 1 [OS=Homo sapiens]	0.552414	0.414	5.46678	2.21313	0.825	2.54474	0.0583391	0.0311103	Rejected	Rejected
P41240	tyrosine-protein kinase CSK [OS=Homo sapiens]	0.676911	0.119	1.65236	1.26407	0.825	1.52341	0.0744243	0.0311453	Rejected	Rejected
P61081	NEDD8-conjugating enzyme Ubc12 [OS=Homo sapiens]	1.50015	0.78	1.89657	1.4924	0.824	1.93348	0.0337055	0.0311802	Rejected	Rejected
O15294	UDP-N-acetylglucosamine--peptide N-acetylglucosaminyltransferase 110 kDa subunit [OS=Homo sapiens]	3.89476	0.628	5.49766	1.89001	0.823	4.05759	0.0445569	0.0312151	Rejected	Rejected
Q99661-1	Kinesin-like protein KIF2C [OS=Homo sapiens]	1.58383	0.623	3.67671	1.90525	0.823	2.85303	0.0451151	0.03125	Rejected	Rejected
O43290	U4/U6.U5 tri-snRNP-associated protein 1 [OS=Homo sapiens]	1.07293	0.578	1.54615	1.38854	0.823	1.61722	0.0486043	0.0312849	Rejected	Rejected
P55081	microfibrillar-associated protein 1 [OS=Homo sapiens]	1.40369	0.979	1.32863	1.31275	0.822	1.57366	0.011933	0.0313198	Rejected	Rejected
P61106	Ras-related protein Rab-14 [OS=Homo sapiens]	1.40813	0.905	1.49911	4.64841	0.822	6.32807	0.0218423	0.0313547	Rejected	Rejected
Q8WYA6	Beta-catenin-like protein 1 [OS=Homo sapiens]	1.15898	0.786	1.36281	6.77362	0.822	8.05473	0.032903	0.0313897	Rejected	Rejected
Q96RT1-8	Isoform 8 of Protein LAP2 [OS=Homo sapiens]	1.09919	0.645	1.40982	1.1998	0.822	1.37933	0.043231	0.0314246	Rejected	Rejected
P00367	Glutamate dehydrogenase 1, mitochondrial [OS=Homo sapiens]	2.72968	0.786	4.7348	2.0559	0.821	2.77273	0.0328332	0.0314595	Rejected	Rejected
Q02878	60S ribosomal protein L6 [OS=Homo sapiens]	1.05991	0.635	1.31826	1.18788	0.821	1.34937	0.0438939	0.0314944	Rejected	Rejected
P46782	40S ribosomal protein S5 [OS=Homo sapiens]	1.14727	0.612	2.02958	1.52762	0.821	2.34825	0.0459874	0.0315293	Rejected	Rejected
Q9UIF9-1	Bromodomain adjacent to zinc finger domain protein 2A [OS=Homo sapiens]	1.44383	0.81	1.91815	1.77032	0.82	2.4432	0.0309142	0.0315642	Rejected	Rejected
P15880	40S ribosomal protein S2 [OS=Homo sapiens]	0.922207	0.341	1.41787	1.87209	0.82	2.26168	0.0628402	0.0315992	Rejected	Rejected
P07384	Calpain-1 catalytic subunit [OS=Homo sapiens]	2.03281	0.978	1.83175	1.54315	0.817	1.99946	0.0120726	0.0316341	Rejected	Rejected
Q05D32	CTD small phosphatase-like protein 2 [OS=Homo sapiens]	0.933862	0.398	1.56003	1.76816	0.817	2.03356	0.0595604	0.031669	Rejected	Rejected
Q8TCA0-1	Leucine-rich repeat-containing protein 20 [OS=Homo sapiens]	2.54639	0.813	3.85854	1.96251	0.815	2.46133	0.0306699	0.0317039	Rejected	Rejected
P23921	Ribonucleoside-diphosphate reductase large subunit [OS=Homo sapiens]	1.7056	0.734	2.46836	2.03524	0.815	3.10976	0.0369156	0.0317388	Rejected	Rejected
P57105	Synaptojanin-2-binding protein [OS=Homo sapiens]	1.09207	0.619	1.52372	2.06114	0.814	2.56226	0.0455338	0.0317737	Rejected	Rejected
O75915	PRA1 family protein 3 [OS=Homo sapiens]	0.606927	0.275	23.2429	2.0776	0.814	3.16512	0.0659107	0.0318087	Rejected	Rejected
Q9H5V9-1	UPF0428 protein CXorf56 [OS=Homo sapiens]	2.20472	0.812	2.46732	1.46619	0.813	2.06252	0.0308095	0.0318436	Rejected	Rejected
Q9Y3Z3	deoxynucleoside triphosphate triphosphohydrolase SAMHD1 [OS=Homo sapiens]	1.67158	0.714	2.6056	1.35634	0.813	1.87256	0.0385555	0.0318785	Rejected	Rejected
P28065	Proteasome subunit beta type-9 [OS=Homo sapiens]	0.964488	0.385	1.26122	1.27276	0.813	1.44454	0.0601535	0.0319134	Rejected	Rejected
Q14966-1	Zinc finger protein 638 [OS=Homo sapiens]	1.95594	0.96	1.91879	1.49352	0.812	1.76199	0.0153873	0.0319483	Rejected	Rejected
P53621-2	Isoform 2 of Coatomer subunit alpha [OS=Homo sapiens]	1.8034	0.689	3.06784	2.00155	0.812	3.22457	0.0404047	0.0319832	Rejected	Rejected
P14635	G2/mitotic-specific cyclin-B1 [OS=Homo sapiens]	1.03252	0.55	1.51892	1.4349	0.812	1.79829	0.0509072	0.0320182	Rejected	Rejected
Q9Y4G6	Talin-2 [OS=Homo sapiens]	0.904736	0.367	1.56945	1.4087	0.812	1.82031	0.0612352	0.0320531	Rejected	Rejected
P36578	60S ribosomal protein L4 [OS=Homo sapiens]	0.887259	0.271	1.33666	1.16584	0.812	1.28615	0.0663294	0.032088	Rejected	Rejected
Q8TEQ6	gem-associated protein 5 [OS=Homo sapiens]	6.65539	1	2.37331	1.65449	0.81	2.04691	0.00244243	0.0321229	Enriched	Rejected
Q9Y3E5	Peptidyl-tRNA hydrolase 2, mitochondrial [OS=Homo sapiens]	5.59731	0.99	3.2368	1.51694	0.81	1.90138	0.00889742	0.0321578	Rejected	Rejected
P41091	eukaryotic translation initiation factor 2 subunit 3 [OS=Homo sapiens]	1.5175	0.937	1.61102	1.2267	0.81	1.46837	0.0182135	0.0321927	Rejected	Rejected
Q03701	CCAAT/enhancer-binding protein zeta [OS=Homo sapiens]	1.1603	0.891	1.20277	1.15868	0.81	1.33248	0.0235869	0.0322277	Rejected	Rejected
Q9BXR0	Queuine tRNA-ribosyltransferase [OS=Homo sapiens]	2.38958	0.802	4.26771	2.98279	0.81	4.41458	0.0315422	0.0322626	Rejected	Rejected
P14314	Glucosidase 2 subunit beta [OS=Homo sapiens]	1.5017	0.691	2.6488	2.13035	0.81	2.73397	0.0401256	0.0322975	Rejected	Rejected
Q9Y6M1	Insulin-like growth factor 2 mRNA-binding protein 2 [OS=Homo sapiens]	0.98537	0.471	1.58627	1.17821	0.81	1.34089	0.0552687	0.0323324	Rejected	Rejected
O95816	BAG family molecular chaperone regulator 2 [OS=Homo sapiens]	1.81499	0.951	1.80898	1.42448	0.809	1.68638	0.0165038	0.0323673	Rejected	Rejected
Q96K21	Abscission/NoCut checkpoint regulator [OS=Homo sapiens]	1.39759	0.92	1.46643	1.22087	0.809	1.45091	0.020307	0.0324022	Rejected	Rejected
Q86V21-1	acetoacetyl-CoA synthetase [OS=Homo sapiens]	0.997749	0.499	1.17445	1.24416	0.809	1.43437	0.0537334	0.0324372	Rejected	Rejected
Q9P270	SLAIN motif-containing protein 2 [OS=Homo sapiens]	0.593692	0.04	1.7015	3.08139	0.808	3.67038	0.0787858	0.0324721	Rejected	Rejected
P47813	Eukaryotic translation initiation factor 1A, X-chromosomal [OS=Homo sapiens]	0.678109	0.253	2.32046	1.72513	0.807	2.22932	0.0675506	0.032507	Rejected	Rejected
Q12931	heat shock protein 75 kDa, mitochondrial [OS=Homo sapiens]	4.77026	0.999	2.63489	1.55288	0.806	2.36385	0.00457083	0.0325419	Enriched	Rejected
O15371	Eukaryotic translation initiation factor 3 subunit D [OS=Homo sapiens]	2.47878	0.913	2.80158	1.96264	0.806	3.97548	0.0211793	0.0325768	Rejected	Rejected
P35269	General transcription factor iif subunit 1 [OS=Homo sapiens]	1.21723	0.855	1.34126	1.25621	0.806	1.51596	0.0270761	0.0326117	Rejected	Rejected
Q16401	26S proteasome non-ATPase regulatory subunit 5 [OS=Homo sapiens]	1.95516	0.515	3.09033	2.15201	0.806	2.41651	0.0527913	0.0326466	Rejected	Rejected
P29083	General transcription factor IIE subunit 1 [OS=Homo sapiens]	0.819782	0.122	1.29397	1.1554	0.806	1.31514	0.0742847	0.0326816	Rejected	Rejected
Q8TEX9-2	Isoform 2 of Importin-4 [OS=Homo sapiens]	4.91787	0.98	3.7034	2.18816	0.805	3.37095	0.011619	0.0327165	Rejected	Rejected
Q15155	Nodal modulator 1 [OS=Homo sapiens]	1.50245	0.929	1.60143	1.16563	0.805	1.31987	0.0192603	0.0327514	Rejected	Rejected
O75330-3	Isoform 3 of Hyaluronan mediated motility receptor [OS=Homo sapiens]	2.72695	0.925	2.99932	1.7753	0.805	2.22408	0.0195743	0.0327863	Rejected	Rejected
P53004	Biliverdin reductase A [OS=Homo sapiens]	1.06057	0.652	1.30136	1.15127	0.805	1.2818	0.0427774	0.0328212	Rejected	Rejected
Q9BYD3	39S ribosomal protein L4, mitochondrial [OS=Homo sapiens]	0.944785	0.331	1.27314	1.2222	0.805	1.4813	0.0634334	0.0328561	Rejected	Rejected
Q99615-1	DnaJ homolog subfamily C member 7 [OS=Homo sapiens]	10.2603	1	3.45726	2.05412	0.803	3.76581	0.00282624	0.0328911	Enriched	Rejected
Q01105	Protein SET [OS=Homo sapiens]	1.54137	0.833	2.02115	10.1139	0.803	15.6923	0.0289253	0.032926	Rejected	Rejected
Q9Y303-3	Isoform 3 of N-acetylglucosamine-6-phosphate deacetylase [OS=Homo sapiens]	1.04436	0.574	1.54335	1.17228	0.803	1.33842	0.0490579	0.0329609	Rejected	Rejected
Q15738	sterol-4-alpha-carboxylate 3-dehydrogenase, decarboxylating [OS=Homo sapiens]	0.504725	0.227	6.71312	3.4895	0.803	7.35071	0.0688416	0.0329958	Rejected	Rejected
P09382	Galectin-1 [OS=Homo sapiens]	0.582211	0.034	1.70561	1.16228	0.803	1.40309	0.0792394	0.0330307	Rejected	Rejected
P14618	Pyruvate kinase PKM [OS=Homo sapiens]	1.23355	0.629	3.02831	2.19461	0.802	5.80743	0.0444173	0.0330656	Rejected	Rejected
Q16822-1	Phosphoenolpyruvate carboxykinase [GTP], mitochondrial [OS=Homo sapiens]	6.96912	0.588	11.4025	3.30428	0.802	3.7241	0.0479414	0.0331006	Rejected	Rejected
P30043	flavin reductase (NADPH) [OS=Homo sapiens]	7.34901	0.995	3.70151	16.2497	0.8	23.7261	0.00722261	0.0331355	Enriched	Rejected
O75381-1	Peroxisomal membrane protein PEX14 [OS=Homo sapiens]	1.16672	0.746	1.42998	1.23191	0.8	1.47453	0.0363573	0.0331704	Rejected	Rejected
P19174-2	Isoform 2 of 1-phosphatidylinositol 4,5-bisphosphate phosphodiesterase gamma-1 [OS=Homo sapiens]	0.684479	0.021	1.39139	1.21871	0.8	1.4744	0.0800768	0.0332053	Rejected	Rejected
P61225	ras-related protein Rap-2b [OS=Homo sapiens]	14.1238	0.57	20.8688	2.33847	0.799	3.95386	0.0493719	0.0332402	Rejected	Rejected
Q86X55	Histone-arginine methyltransferase CARM1 [OS=Homo sapiens]	0.916787	0.387	1.27922	1.19869	0.799	1.36215	0.0600488	0.0332751	Rejected	Rejected
P07741-1	Adenine phosphoribosyltransferase [OS=Homo sapiens]	0.836933	0.36	3.45499	3.49234	0.799	8.22497	0.061619	0.0333101	Rejected	Rejected
Q9BSD7	Cancer-related nucleoside-triphosphatase [OS=Homo sapiens]	1.44208	0.71	2.72838	1.96035	0.798	2.67557	0.0387997	0.033345	Rejected	Rejected
Q7RTV0	PHD finger-like domain-containing protein 5A [OS=Homo sapiens]	1.91083	0.628	9.17477	1.25292	0.798	1.58578	0.0445918	0.0333799	Rejected	Rejected
P57764	Gasdermin-D [OS=Homo sapiens]	0.797489	0.411	3.55545	2.1815	0.798	4.29243	0.0584438	0.0334148	Rejected	Rejected
P46778	60S ribosomal protein L21 [OS=Homo sapiens]	0.845582	0.332	2.12655	1.95555	0.798	3.95539	0.0633287	0.0334497	Rejected	Rejected
P19404	NADH dehydrogenase [ubiquinone] flavoprotein 2, mitochondrial [OS=Homo sapiens]	0.801341	0.126	1.30932	1.10919	0.797	1.26032	0.07418	0.0334846	Rejected	Rejected
Q9NW13-1	RNA-binding protein 28 [OS=Homo sapiens]	1.26734	0.93	1.29736	1.18406	0.796	1.38389	0.0191207	0.0335196	Rejected	Rejected
Q15904	V-type proton ATPase subunit S1 [OS=Homo sapiens]	0.914289	0.319	1.35178	1.20511	0.796	1.43006	0.0639916	0.0335545	Rejected	Rejected
Q13185	chromobox protein homolog 3 [OS=Homo sapiens]	2.09686	0.928	2.15761	1.26166	0.795	1.41038	0.0193301	0.0335894	Rejected	Rejected
Q9NR30-1	Nucleolar RNA helicase 2 [OS=Homo sapiens]	3.0877	0.793	5.61673	3.21917	0.795	4.67764	0.0320656	0.0336243	Rejected	Rejected
O00505	Importin subunit alpha-4 [OS=Homo sapiens]	0.652163	0.007	1.35398	2.31521	0.795	2.8607	0.0808095	0.0336592	Rejected	Rejected
O00159-1	Unconventional myosin-Ic [OS=Homo sapiens]	2.77551	0.997	1.97179	1.33437	0.794	1.86197	0.00575715	0.0336941	Enriched	Rejected
Q15042-3	Isoform 2 of Rab3 GTPase-activating protein catalytic subunit [OS=Homo sapiens]	7.4736	0.949	7.48964	5.26932	0.794	7.21342	0.0168528	0.0337291	Rejected	Rejected
P54136-1	arginine--tRNA ligase, cytoplasmic [OS=Homo sapiens]	0.410543	0.294	3.07017	2.0539	0.794	2.90727	0.0650733	0.033764	Rejected	Rejected
Q16186	Proteasomal ubiquitin receptor ADRM1 [OS=Homo sapiens]	16.0229	0.984	5.06111	4.0124	0.793	9.15753	0.010956	0.0337989	Rejected	Rejected
P09960-1	leukotriene A-4 hydrolase [OS=Homo sapiens]	0.466014	0.053	2.17522	2.60077	0.792	4.83419	0.0779484	0.0338338	Rejected	Rejected
Q92900	Regulator of nonsense transcripts 1 [OS=Homo sapiens]	1.04332	0.561	1.43436	1.18449	0.791	1.41966	0.05	0.0338687	Rejected	Rejected
O75955	Flotillin-1 [OS=Homo sapiens]	1.04721	0.54	1.94273	2.59418	0.791	3.15497	0.0514306	0.0339036	Rejected	Rejected
P42696	RNA-binding protein 34 [OS=Homo sapiens]	1.01064	0.496	1.33726	1.15742	0.79	1.27165	0.0541521	0.0339385	Rejected	Rejected
P48507	Glutamate--cysteine ligase regulatory subunit [OS=Homo sapiens]	1.09571	0.682	1.43718	1.19824	0.789	1.44124	0.0407886	0.0339735	Rejected	Rejected
P35658-5	Isoform 5 of Nuclear pore complex protein Nup214 [OS=Homo sapiens]	2.06352	0.987	1.70828	1.21724	0.788	1.48956	0.0098395	0.0340084	Rejected	Rejected
P29144	Tripeptidyl-peptidase 2 [OS=Homo sapiens]	1.60062	0.81	2.62931	1.5263	0.788	2.54467	0.0309491	0.0340433	Rejected	Rejected
P53985	Monocarboxylate transporter 1 [OS=Homo sapiens]	3.96468	0.997	3.40278	1.71041	0.787	2.14289	0.00610607	0.0340782	Enriched	Rejected
O95758-4	Isoform 4 of Polypyrimidine tract-binding protein 3 [OS=Homo sapiens]	1.09365	0.664	1.36783	1.31928	0.787	1.50205	0.0419749	0.0341131	Rejected	Rejected
Q13404-1	Isoform 1 of Ubiquitin-conjugating enzyme E2 variant 1 [OS=Homo sapiens]	0.769842	0.188	1.56217	1.15806	0.787	1.36553	0.0701675	0.034148	Rejected	Rejected
P14866	Heterogeneous nuclear ribonucleoprotein L [OS=Homo sapiens]	1.01359	0.529	1.74245	1.45	0.786	1.82529	0.0521284	0.034183	Rejected	Rejected
O95071	E3 ubiquitin-protein ligase UBR5 [OS=Homo sapiens]	0.793066	0.173	1.41375	1.21451	0.786	1.55559	0.0711096	0.0342179	Rejected	Rejected
Q96T76-8	Isoform 5 of MMS19 nucleotide excision repair protein homolog [OS=Homo sapiens]	15.3083	0.998	11.9241	5.95098	0.785	11.7844	0.00533845	0.0342528	Enriched	Rejected
Q9UI12-1	V-type proton ATPase subunit H [OS=Homo sapiens]	0.959553	0.456	1.81457	1.39066	0.785	1.64577	0.0562805	0.0342877	Rejected	Rejected
P40937-1	Replication factor C subunit 5 [OS=Homo sapiens]	1.31364	0.709	2.29291	2.37937	0.784	3.3817	0.0389044	0.0343226	Rejected	Rejected
P49593	Protein phosphatase 1F [OS=Homo sapiens]	3.6346	0.547	5.16855	1.2485	0.784	1.54166	0.0511514	0.0343575	Rejected	Rejected
Q9H074	Polyadenylate-binding protein-interacting protein 1 [OS=Homo sapiens]	7.75808	0.912	8.05671	3.11033	0.783	3.6443	0.0213189	0.0343925	Rejected	Rejected
Q9BW27	nuclear pore complex protein Nup85 [OS=Homo sapiens]	1.24709	0.884	1.33326	1.46869	0.783	1.70515	0.0241452	0.0344274	Rejected	Rejected
Q0ZGT2	Nexilin [OS=Homo sapiens]	1.04585	0.626	1.24473	1.10386	0.783	1.23668	0.0449058	0.0344623	Rejected	Rejected
Q9BTZ2	dehydrogenase/reductase sdr family member 4 [OS=Homo sapiens]	1.01745	0.552	1.2173	1.16266	0.783	1.34772	0.0506978	0.0344972	Rejected	Rejected
Q9C0C9	(E3-independent) E2 ubiquitin-conjugating enzyme [OS=Homo sapiens]	1.72763	0.946	1.74586	1.24169	0.782	1.64113	0.017097	0.0345321	Rejected	Rejected
Q16666-1	gamma-interferon-inducible protein 16 [OS=Homo sapiens]	1.70766	0.758	3.17348	1.58534	0.782	2.30763	0.0355548	0.034567	Rejected	Rejected
O00743-3	Isoform 3 of Serine/threonine-protein phosphatase 6 catalytic subunit [OS=Homo sapiens]	2.25361	0.913	2.566	1.65459	0.781	2.29629	0.0212142	0.034602	Rejected	Rejected
P36551	Oxygen-dependent coproporphyrinogen-III oxidase, mitochondrial [OS=Homo sapiens]	2.62831	0.895	3.07121	2.88306	0.781	5.08059	0.0229588	0.0346369	Rejected	Rejected
P85037-1	Forkhead box protein K1 [OS=Homo sapiens]	9.63708	0.841	10.7996	1.09232	0.781	1.1903	0.0282973	0.0346718	Rejected	Rejected
Q9BT78	COP9 signalosome complex subunit 4 [OS=Homo sapiens]	4.56005	0.676	6.58522	1.97333	0.781	2.63959	0.0413119	0.0347067	Rejected	Rejected
Q13557-11	Isoform Delta 11 of Calcium/calmodulin-dependent protein kinase type II subunit delta [OS=Homo sapiens]	0.927251	0.419	1.59485	1.14122	0.781	1.27577	0.0581996	0.0347416	Rejected	Rejected
Q6IAA8	ragulator complex protein LAMTOR1 [OS=Homo sapiens]	0.730945	0.02	1.27296	1.11753	0.781	1.27373	0.0801814	0.0347765	Rejected	Rejected
Q13310-3	Isoform 3 of Polyadenylate-binding protein 4 [OS=Homo sapiens]	2.88983	0.981	2.35211	1.7662	0.779	2.37127	0.0113398	0.0348115	Rejected	Rejected
P35232	Prohibitin [OS=Homo sapiens]	6.7373	0.894	7.42226	1.76967	0.779	6.52567	0.0230286	0.0348464	Rejected	Rejected
O43747-2	Isoform 2 of AP-1 complex subunit gamma-1 [OS=Homo sapiens]	1.10671	0.543	3.70451	1.37998	0.779	1.87605	0.0513608	0.0348813	Rejected	Rejected
P05387	60S acidic ribosomal protein P2 [OS=Homo sapiens]	0.483196	0.341	3.6824	1.22618	0.779	1.51924	0.0628751	0.0349162	Rejected	Rejected
O76031	ATP-dependent Clp protease ATP-binding subunit clpX-like, mitochondrial [OS=Homo sapiens]	5.3735	0.974	4.92884	1.3531	0.777	2.80556	0.0131891	0.0349511	Rejected	Rejected
Q92922	SWI/SNF complex subunit SMARCC1 [OS=Homo sapiens]	1.13217	0.707	1.43047	1.22469	0.777	1.52289	0.0391835	0.034986	Rejected	Rejected
Q06323-1	Proteasome activator complex subunit 1 [OS=Homo sapiens]	1.61699	0.835	2.01619	4.19371	0.776	5.70026	0.0288207	0.0350209	Rejected	Rejected
Q9Y5B8	Nucleoside diphosphate kinase 7 [OS=Homo sapiens]	1.36786	0.786	1.90904	1.59154	0.776	2.54672	0.0329379	0.0350559	Rejected	Rejected
Q7Z2Z2	Elongation factor-like GTPase 1 [OS=Homo sapiens]	1.2832	0.922	1.32726	1.15176	0.775	1.33901	0.019993	0.0350908	Rejected	Rejected
P60033	CD81 antigen [OS=Homo sapiens]	1.47903	0.765	2.87608	1.7907	0.775	3.1878	0.0351012	0.0351257	Rejected	Rejected
P31151	Protein S100-A7 [OS=Homo sapiens]	1.14831	0.744	1.4398	1.43595	0.775	2.22948	0.0365318	0.0351606	Rejected	Rejected
Q8N488	RING1 and YY1-binding protein [OS=Homo sapiens]	1.00276	0.469	1.63577	1.17516	0.775	1.3562	0.055478	0.0351955	Rejected	Rejected
P61201-1	COP9 signalosome complex subunit 2 [OS=Homo sapiens]	0.476663	0.067	2.10766	1.81522	0.775	3.21207	0.0770761	0.0352304	Rejected	Rejected
P52701	DNA mismatch repair protein MSH6 [OS=Homo sapiens]	3.18619	0.995	2.1799	1.33371	0.774	1.9339	0.00715283	0.0352654	Enriched	Rejected
P50402	Emerin [OS=Homo sapiens]	1.82938	0.985	1.63648	1.18854	0.774	1.40952	0.0107118	0.0353003	Rejected	Rejected
P29034	protein S100-A2 [OS=Homo sapiens]	1.44274	0.867	1.7019	1.40631	0.774	2.23919	0.0257502	0.0353352	Rejected	Rejected
Q8NHV4-3	Isoform 3 of Protein NEDD1 [OS=Homo sapiens]	1.00395	0.514	1.55489	1.13932	0.774	1.33993	0.052896	0.0353701	Rejected	Rejected
P14406	Cytochrome c oxidase subunit 7A2, mitochondrial [OS=Homo sapiens]	0.834557	0.17	1.30768	1.0879	0.774	1.19466	0.071284	0.035405	Rejected	Rejected
Q13867	bleomycin hydrolase [OS=Homo sapiens]	1.21066	0.571	3.53686	1.78267	0.773	3.24049	0.0492324	0.0354399	Rejected	Rejected
P05089-2	Isoform 2 of Arginase-1 [OS=Homo sapiens]	0.918055	0.366	1.55517	1.31818	0.773	1.96847	0.0613398	0.0354749	Rejected	Rejected
P35754	Glutaredoxin-1 [OS=Homo sapiens]	0.747561	0.026	1.30321	1.13865	0.773	1.30002	0.0798325	0.0355098	Rejected	Rejected
Q92930	Ras-related protein Rab-8B [OS=Homo sapiens]	1.69975	0.935	1.78632	1.35798	0.772	2.051	0.0184927	0.0355447	Rejected	Rejected
Q86VY4	Testis-specific Y-encoded-like protein 5 [OS=Homo sapiens]	1.5475	0.819	1.99047	19.9027	0.772	34.9925	0.0301465	0.0355796	Rejected	Rejected
P78347	General transcription factor II-I [OS=Homo sapiens]	1.37911	0.973	1.33583	1.19413	0.771	1.45413	0.0133636	0.0356145	Rejected	Rejected
P51153	Ras-related protein Rab-13 [OS=Homo sapiens]	1.18004	0.564	2.42423	1.47415	0.771	2.38416	0.0498604	0.0356494	Rejected	Rejected
Q9UL25	Ras-related protein Rab-21 [OS=Homo sapiens]	0.913272	0.319	1.32626	1.19713	0.768	1.50334	0.0639567	0.0356844	Rejected	Rejected
Q92917	G patch domain and KOW motifs-containing protein [OS=Homo sapiens]	0.887509	0.338	1.519	1.08737	0.767	1.2205	0.0631542	0.0357193	Rejected	Rejected
Q99567	Nuclear pore complex protein Nup88 [OS=Homo sapiens]	1.08475	0.659	1.38386	1.21015	0.766	1.59226	0.0423587	0.0357542	Rejected	Rejected
O14880	Microsomal glutathione S-transferase 3 [OS=Homo sapiens]	4.41353	0.953	4.08258	3.25837	0.764	6.70414	0.01612	0.0357891	Rejected	Rejected
Q96J01	THO complex subunit 3 [OS=Homo sapiens]	1.62742	0.909	1.72149	1.29524	0.764	1.74275	0.0215283	0.035824	Rejected	Rejected
P16632-1	40S ribosomal protein S24 [OS=Homo sapiens]	1.91891	0.879	2.30186	1.94669	0.764	2.72595	0.024529	0.0358589	Rejected	Rejected
Q14651	Plastin-1 [OS=Homo sapiens]	0.354342	0.004	1.94945	1.41602	0.764	1.97514	0.0809839	0.0358939	Rejected	Rejected
Q6IBS0	Twinfilin-2 [OS=Homo sapiens]	4.53717	0.986	4.21477	1.95649	0.763	3.20867	0.0101884	0.0359288	Rejected	Rejected
P26358-2	Isoform 2 of DNA (cytosine-5)-methyltransferase 1 [OS=Homo sapiens]	1.06679	0.642	1.32239	1.16273	0.763	1.38048	0.0435101	0.0359637	Rejected	Rejected
Q14315	Filamin-C [OS=Homo sapiens]	1.76694	0.99	1.61004	1.40243	0.762	2.2678	0.00861828	0.0359986	Rejected	Rejected
P62750	60S ribosomal protein L23a [OS=Homo sapiens]	1.19315	0.73	1.52971	1.3349	0.762	1.87287	0.0372296	0.0360335	Rejected	Rejected
Q15417	Calponin-3 [OS=Homo sapiens]	1.37342	0.783	1.78936	2.40774	0.761	2.83932	0.0331821	0.0360684	Rejected	Rejected
Q9NYL2-2	Isoform 2 of Mitogen-activated protein kinase kinase kinase MLT [OS=Homo sapiens]	1.33805	0.782	1.89748	1.17849	0.761	1.46994	0.0333217	0.0361034	Rejected	Rejected
Q9Y2X7-3	Isoform 3 of ARF GTPase-activating protein GIT1 [OS=Homo sapiens]	1.34531	0.702	1.77815	2.06406	0.761	7.82225	0.0395673	0.0361383	Rejected	Rejected
P12429	annexin A3 [OS=Homo sapiens]	1.07414	0.545	2.03271	1.33014	0.761	1.97863	0.0512561	0.0361732	Rejected	Rejected
Q15029	116 kDa U5 small nuclear ribonucleoprotein component [OS=Homo sapiens]	0.845239	0.467	8.07142	1.58238	0.761	2.53328	0.0555478	0.0362081	Rejected	Rejected
O95571	Persulfide dioxygenase ETHE1, mitochondrial [OS=Homo sapiens]	0.902277	0.268	1.24982	2.13395	0.761	2.68801	0.0664689	0.036243	Rejected	Rejected
Q8TF05	Serine/threonine-protein phosphatase 4 regulatory subunit 1 [OS=Homo sapiens]	1.74835	0.99	1.52945	1.13335	0.76	1.35459	0.00893231	0.0362779	Rejected	Rejected
Q96KB5	Lymphokine-activated killer T-cell-originated protein kinase [OS=Homo sapiens]	2.61932	0.895	3.03367	1.36662	0.76	2.27089	0.022889	0.0363128	Rejected	Rejected
Q9Y4W2	Ribosomal biogenesis protein LAS1L [OS=Homo sapiens]	1.67135	0.951	1.66638	1.16041	0.759	1.35656	0.0165387	0.0363478	Rejected	Rejected
Q14CX7-1	N-alpha-acetyltransferase 25, NatB auxiliary subunit [OS=Homo sapiens]	0.885184	0.293	1.4153	2.27178	0.759	2.74849	0.0651431	0.0363827	Rejected	Rejected
Q86UP2-1	Kinectin [OS=Homo sapiens]	0.0568601	0.003	3.37988	1.90941	0.759	3.86463	0.0810537	0.0364176	Rejected	Rejected
P23258	tubulin gamma-1 chain [OS=Homo sapiens]	1.33689	0.63	1.70099	1.24151	0.758	1.71228	0.0442428	0.0364525	Rejected	Rejected
P78371-1	T-complex protein 1 subunit beta [OS=Homo sapiens]	1.07653	0.549	2.37042	1.42929	0.758	2.04577	0.050977	0.0364874	Rejected	Rejected
P04183	Thymidine kinase, cytosolic [OS=Homo sapiens]	0.893451	0.262	1.31771	1.30421	0.758	1.68051	0.0669574	0.0365223	Rejected	Rejected
P36952-1	Serpin B5 [OS=Homo sapiens]	0.997044	0.492	1.52578	1.13427	0.757	1.33032	0.0543615	0.0365573	Rejected	Rejected
O75874	Isocitrate dehydrogenase [NADP] cytoplasmic [OS=Homo sapiens]	3.10231	0.997	2.29342	1.37788	0.756	2.35195	0.00582694	0.0365922	Enriched	Rejected
Q9UM00-1	Transmembrane and coiled-coil domain-containing protein 1 [OS=Homo sapiens]	1.04303	0.657	1.17297	1.21337	0.756	1.51784	0.0424983	0.0366271	Rejected	Rejected
P52788-1	Spermine synthase [OS=Homo sapiens]	0.710323	0.34	2.93449	2.26209	0.756	2.59022	0.0629798	0.036662	Rejected	Rejected
A6NDG6	glycerol-3-phosphate phosphatase [OS=Homo sapiens]	1.4073	0.858	1.73272	1.17391	0.755	1.3493	0.026762	0.0366969	Rejected	Rejected
P49591	Serine--tRNA ligase, cytoplasmic [OS=Homo sapiens]	1.18144	0.78	1.37321	1.12719	0.755	1.30226	0.0336008	0.0367318	Rejected	Rejected
Q9Y2X3	Nucleolar protein 58 [OS=Homo sapiens]	0.378809	0.103	2.95613	1.93888	0.755	3.47375	0.0750523	0.0367668	Rejected	Rejected
O60763-2	Isoform 2 of General vesicular transport factor p115 [OS=Homo sapiens]	1.4643	0.899	1.60159	4.28967	0.754	6.93686	0.022575	0.0368017	Rejected	Rejected
Q96R06	Sperm-associated antigen 5 [OS=Homo sapiens]	1.1677	0.874	1.25009	1.16416	0.754	1.42087	0.0249826	0.0368366	Rejected	Rejected
P18084	Integrin beta-5 [OS=Homo sapiens]	0.927691	0.344	1.27749	1.18102	0.754	1.40081	0.0626657	0.0368715	Rejected	Rejected
P13473-3	Isoform LAMP-2C of Lysosome-associated membrane glycoprotein 2 [OS=Homo sapiens]	0.785379	0.131	1.42971	1.15135	0.754	1.44541	0.0737613	0.0369064	Rejected	Rejected
Q562R1	Beta-actin-like protein 2 [OS=Homo sapiens]	88.3374	0.754	92.5059	1.18008	0.753	1.47778	0.0357641	0.0369413	Rejected	Rejected
P23526-1	Adenosylhomocysteinase [OS=Homo sapiens]	1.65014	0.806	2.7288	1.22166	0.752	1.64019	0.0311584	0.0369763	Rejected	Rejected
P30419	glycylpeptide N-tetradecanoyltransferase 1 [OS=Homo sapiens]	2.14918	0.6	2.64423	1.39042	0.752	1.61108	0.0470342	0.0370112	Rejected	Rejected
Q9BZD4	kinetochore protein nuf2 [OS=Homo sapiens]	0.850995	0.151	1.29482	1.16586	0.752	1.52519	0.0724006	0.0370461	Rejected	Rejected
P00403	Cytochrome c oxidase subunit 2 [OS=Homo sapiens]	0.717025	0.03	1.37324	1.13301	0.752	1.33797	0.0794836	0.037081	Rejected	Rejected
P23368-1	NAD-dependent malic enzyme, mitochondrial [OS=Homo sapiens]	0.969418	0.439	1.26848	1.18456	0.75	1.48003	0.057083	0.0371159	Rejected	Rejected
P29401-2	Isoform 2 of Transketolase [OS=Homo sapiens]	1.74549	0.76	4.78438	1.25744	0.749	1.63849	0.0353803	0.0371508	Rejected	Rejected
P28482	mitogen-activated protein kinase 1 [OS=Homo sapiens]	1.13153	0.588	2.71146	1.43114	0.749	2.43317	0.0479065	0.0371858	Rejected	Rejected
Q53GL7	Poly [ADP-ribose] polymerase 10 [OS=Homo sapiens]	1.00179	0.498	1.35353	1.08987	0.749	1.22783	0.053873	0.0372207	Rejected	Rejected
Q9H6T3	RNA polymerase II-associated protein 3 [OS=Homo sapiens]	0.652166	0.287	1.91345	1.71964	0.749	1.99144	0.065492	0.0372556	Rejected	Rejected
Q69YN4	protein virilizer homolog [OS=Homo sapiens]	0.990499	0.464	1.25115	1.77512	0.748	2.44086	0.055792	0.0372905	Rejected	Rejected
Q68CZ2-1	Tensin-3 [OS=Homo sapiens]	0.650034	0.012	1.37652	1.1538	0.748	1.29324	0.0805652	0.0373254	Rejected	Rejected
P25398	40S ribosomal protein S12 [OS=Homo sapiens]	0.984738	0.486	2.37118	1.3678	0.747	1.86024	0.0545708	0.0373603	Rejected	Rejected
P13073	Cytochrome c oxidase subunit 4 isoform 1, mitochondrial [OS=Homo sapiens]	0.871754	0.234	1.34483	1.19867	0.747	1.49514	0.0684578	0.0373953	Rejected	Rejected
Q96A33-1	Coiled-coil domain-containing protein 47 [OS=Homo sapiens]	2.751	0.975	2.55587	1.15356	0.746	1.43005	0.01291	0.0374302	Rejected	Rejected
P53602	Diphosphomevalonate decarboxylase [OS=Homo sapiens]	1.72772	0.905	1.86674	1.26155	0.746	1.87786	0.0219121	0.0374651	Rejected	Rejected
P35251-1	Replication factor C subunit 1 [OS=Homo sapiens]	0.920322	0.356	1.45737	1.15255	0.745	1.37886	0.0620028	0.0375	Rejected	Rejected
Q16881-1	Thioredoxin reductase 1, cytoplasmic [OS=Homo sapiens]	1.25978	0.863	1.41559	1.1862	0.744	1.45944	0.0259595	0.0375349	Rejected	Rejected
P40925-3	Isoform 3 of Malate dehydrogenase, cytoplasmic [OS=Homo sapiens]	1.576	0.803	2.56868	1.35905	0.744	2.36692	0.0313678	0.0375698	Rejected	Rejected
P49748-3	Isoform 3 of Very long-chain specific acyl-CoA dehydrogenase, mitochondrial [OS=Homo sapiens]	3.1374	0.653	5.43305	1.5124	0.744	2.15602	0.0427076	0.0376047	Rejected	Rejected
P53999	Activated RNA polymerase II transcriptional coactivator p15 [OS=Homo sapiens]	1.14728	0.533	3.32096	6.77888	0.744	7.97419	0.0518842	0.0376397	Rejected	Rejected
P12109	Collagen alpha-1(VI) chain [OS=Homo sapiens]	1.06997	0.614	1.39519	1.09572	0.743	1.2369	0.0458828	0.0376746	Rejected	Rejected
Q01085-2	Isoform 2 of Nucleolysin TIAR [OS=Homo sapiens]	0.951096	0.381	1.35384	1.20929	0.743	1.48338	0.060328	0.0377095	Rejected	Rejected
Q5JTH9-1	RRP12-like protein [OS=Homo sapiens]	0.516569	0.011	1.59659	2.04327	0.743	2.8399	0.0806001	0.0377444	Rejected	Rejected
P46976-1	Glycogenin-1 [OS=Homo sapiens]	0.754783	0.043	1.31899	1.16876	0.742	1.46456	0.0785415	0.0377793	Rejected	Rejected
Q9BY77	Polymerase delta-interacting protein 3 [OS=Homo sapiens]	2.81988	0.774	5.145	1.55561	0.741	3.91449	0.0343336	0.0378142	Rejected	Rejected
P53597	Succinyl-CoA ligase [ADP/GDP-forming] subunit alpha, mitochondrial [OS=Homo sapiens]	1.21939	0.779	1.52287	1.20365	0.74	1.56697	0.0338102	0.0378492	Rejected	Rejected
Q53GQ0	Very-long-chain 3-oxoacyl-CoA reductase [OS=Homo sapiens]	3.70652	0.679	7.98309	22.2887	0.74	54.3913	0.0410677	0.0378841	Rejected	Rejected
Q14738-1	Serine/threonine-protein phosphatase 2A 56 kDa regulatory subunit delta isoform [OS=Homo sapiens]	2.93398	0.613	4.19514	2.64434	0.738	9.61247	0.0459525	0.037919	Rejected	Rejected
O43395	U4/U6 small nuclear ribonucleoprotein Prp3 [OS=Homo sapiens]	0.892788	0.287	1.2985	1.09837	0.736	1.27863	0.0655269	0.0379539	Rejected	Rejected
P42766	60S ribosomal protein L35 [OS=Homo sapiens]	0.86289	0.507	2.55663	1.48662	0.735	2.77482	0.0533496	0.0379888	Rejected	Rejected
P48594	Serpin B4 [OS=Homo sapiens]	1.3658	0.919	1.46045	1.11329	0.734	1.34271	0.0204466	0.0380237	Rejected	Rejected
Q7L014	probable ATP-dependent RNA helicase DDX46 [OS=Homo sapiens]	1.09225	0.699	1.26749	1.47822	0.734	1.81336	0.0397069	0.0380587	Rejected	Rejected
P50454	Serpin H1 [OS=Homo sapiens]	0.739437	0.278	2.17513	1.29626	0.734	2.36781	0.065806	0.0380936	Rejected	Rejected
Q96B26	Exosome complex component RRP43 [OS=Homo sapiens]	2.77959	0.721	3.24561	1.16269	0.733	1.40527	0.0378925	0.0381285	Rejected	Rejected
P0CG39	POTE ankyrin domain family member J [OS=Homo sapiens]	1.09232	0.664	1.41668	1.14565	0.733	1.46976	0.04194	0.0381634	Rejected	Rejected
Q9BRJ6	Uncharacterized protein C7orf50 [OS=Homo sapiens]	0.530292	0.057	1.97646	1.87847	0.733	2.2715	0.0777739	0.0381983	Rejected	Rejected
P07910-1	Heterogeneous nuclear ribonucleoproteins C1/C2 [OS=Homo sapiens]	0.768129	0.035	1.26468	2.21227	0.733	2.50886	0.0792045	0.0382332	Rejected	Rejected
O94979-8	Isoform 8 of Protein transport protein Sec31A [OS=Homo sapiens]	2.14617	0.912	2.52276	1.29455	0.732	1.79828	0.0212491	0.0382682	Rejected	Rejected
P62304	small nuclear ribonucleoprotein E [OS=Homo sapiens]	0.91382	0.332	1.42481	1.08643	0.732	1.25876	0.0633636	0.0383031	Rejected	Rejected
Q9Y5A9-1	YTH domain-containing family protein 2 [OS=Homo sapiens]	0.877579	0.323	1.54509	1.2591	0.732	1.7907	0.0636427	0.038338	Rejected	Rejected
P13010	X-ray repair cross-complementing protein 5 [OS=Homo sapiens]	2.80527	0.954	2.77842	1.28811	0.731	1.94932	0.0160502	0.0383729	Rejected	Rejected
O96019-1	Actin-like protein 6A [OS=Homo sapiens]	1.61966	0.902	1.99249	1.19606	0.731	1.52295	0.0221912	0.0384078	Rejected	Rejected
P35249	replication factor C subunit 4 [OS=Homo sapiens]	1.90018	0.85	2.22328	1.22531	0.731	1.78589	0.0275297	0.0384427	Rejected	Rejected
P35609	Alpha-actinin-2 [OS=Homo sapiens]	17.4926	0.829	19.3194	1.36301	0.731	1.90577	0.0295185	0.0384777	Rejected	Rejected
P20700	Lamin-B1 [OS=Homo sapiens]	1.25294	0.698	2.39782	2.54136	0.731	4.45826	0.0398116	0.0385126	Rejected	Rejected
P21291	Cysteine and glycine-rich protein 1 [OS=Homo sapiens]	0.825698	0.321	2.1622	1.25574	0.731	1.9914	0.0637474	0.0385475	Rejected	Rejected
Q9UQ35	serine/arginine repetitive matrix protein 2 [OS=Homo sapiens]	14.0649	0.983	12.192	1.77845	0.73	6.01168	0.0111305	0.0385824	Rejected	Rejected
Q92499	ATP-dependent RNA helicase DDX1 [OS=Homo sapiens]	3.4645	0.977	3.13872	1.40148	0.73	2.25276	0.012247	0.0386173	Rejected	Rejected
P13591-2	Neural cell adhesion molecule 1 [OS=Homo sapiens]	1.15331	0.852	1.2316	1.11128	0.73	1.31088	0.0273552	0.0386522	Rejected	Rejected
Q96CN7	Isochorismatase domain-containing protein 1 [OS=Homo sapiens]	0.345172	0.179	3.30867	4.16507	0.73	5.43901	0.0707606	0.0386872	Rejected	Rejected
P30101	Protein disulfide-isomerase A3 [OS=Homo sapiens]	2.06333	0.89	2.73683	1.40994	0.729	2.2404	0.0236218	0.0387221	Rejected	Rejected
Q15061	WD repeat-containing protein 43 [OS=Homo sapiens]	0.912475	0.378	1.58824	1.21702	0.729	1.59856	0.060642	0.038757	Rejected	Rejected
Q9Y394	Dehydrogenase/reductase SDR family member 7 [OS=Homo sapiens]	1.80275	0.885	2.17923	1.26852	0.728	1.79452	0.0240754	0.0387919	Rejected	Rejected
O75390	citrate synthase, mitochondrial [OS=Homo sapiens]	0.848163	0.381	2.16612	1.43223	0.728	2.3968	0.0602582	0.0388268	Rejected	Rejected
P62879	Guanine nucleotide-binding protein G(I)/G(S)/G(T) subunit beta-2 [OS=Homo sapiens]	1.30568	0.73	6.85654	1.50361	0.727	2.5457	0.0371947	0.0388617	Rejected	Rejected
P25787	Proteasome subunit alpha type-2 [OS=Homo sapiens]	0.777805	0.203	1.63371	1.24113	0.727	1.75	0.0696441	0.0388966	Rejected	Rejected
O60506	Heterogeneous nuclear ribonucleoprotein Q [OS=Homo sapiens]	1.24809	0.704	1.8016	2.08292	0.726	5.42111	0.0393231	0.0389316	Rejected	Rejected
Q9BXW7	Cat eye syndrome critical region protein 5 [OS=Homo sapiens]	1.0312	0.662	1.44634	1.11612	0.726	1.36492	0.0420447	0.0389665	Rejected	Rejected
Q96ST3	Paired amphipathic helix protein Sin3a [OS=Homo sapiens]	0.675013	0.019	1.40773	1.1565	0.726	1.51254	0.0802861	0.0390014	Rejected	Rejected
Q7Z6K5-2	Isoform C15orf38-AP3S2 of Arpin [OS=Homo sapiens]	1.63638	0.97	1.53773	1.2325	0.725	1.85049	0.0137823	0.0390363	Rejected	Rejected
P62244	40S ribosomal protein S15a [OS=Homo sapiens]	1.20117	0.725	1.67896	1.20973	0.725	1.69407	0.0376483	0.0390712	Rejected	Rejected
Q5T4S7-2	Isoform 2 of E3 ubiquitin-protein ligase UBR4 [OS=Homo sapiens]	0.834469	0.261	1.5238	1.33675	0.725	1.61738	0.0670272	0.0391061	Rejected	Rejected
P18031	Tyrosine-protein phosphatase non-receptor type 1 [OS=Homo sapiens]	0.712622	0.087	1.50049	1.17152	0.725	1.53186	0.0760293	0.0391411	Rejected	Rejected
Q96LB3-1	Intraflagellar transport protein 74 homolog [OS=Homo sapiens]	2.15466	0.999	1.51442	1.16498	0.724	1.42604	0.00502442	0.039176	Enriched	Rejected
Q9NR31	GTP-binding protein SAR1a [OS=Homo sapiens]	0.524391	0.23	2.99468	2.37399	0.724	3.139	0.0686322	0.0392109	Rejected	Rejected
P11216	Glycogen phosphorylase, brain form [OS=Homo sapiens]	1.18225	0.814	1.32783	1.13131	0.723	1.33444	0.0306001	0.0392458	Rejected	Rejected
Q8WXX5	dnaJ homolog subfamily C member 9 [OS=Homo sapiens]	1.00452	0.446	1.30765	1.14806	0.723	1.47661	0.0568388	0.0392807	Rejected	Rejected
P13861	cAMP-dependent protein kinase type II-alpha regulatory subunit [OS=Homo sapiens]	0.898781	0.452	2.0201	1.16488	0.722	1.47558	0.0565248	0.0393156	Rejected	Rejected
P53618	Coatomer subunit beta [OS=Homo sapiens]	0.849081	0.38	1.97007	1.24243	0.721	2.11623	0.0604327	0.0393506	Rejected	Rejected
Q99808-2	Isoform 2 of Equilibrative nucleoside transporter 1 [OS=Homo sapiens]	1.47121	0.954	1.45325	1.10252	0.719	1.32466	0.0160851	0.0393855	Rejected	Rejected
P36776	Lon protease homolog, mitochondrial [OS=Homo sapiens]	4.18653	0.939	4.48502	1.42667	0.719	2.47127	0.018074	0.0394204	Rejected	Rejected
Q96M27-2	Isoform 2 of Protein PRRC1 [OS=Homo sapiens]	1.24001	0.936	1.25653	1.15957	0.719	1.47762	0.0183182	0.0394553	Rejected	Rejected
Q9Y277	Voltage-dependent anion-selective channel protein 3 [OS=Homo sapiens]	0.693906	0.093	1.48542	1.19373	0.719	1.52448	0.0754361	0.0394902	Rejected	Rejected
Q5T8P6	RNA-binding protein 26 [OS=Homo sapiens]	1.16252	0.703	1.56094	1.15859	0.718	1.41354	0.0394278	0.0395251	Rejected	Rejected
P25685	dnaJ homolog subfamily B member 1 [OS=Homo sapiens]	1.88048	0.955	1.87319	1.16613	0.717	1.45884	0.0159805	0.0395601	Rejected	Rejected
Q9H845	Acyl-CoA dehydrogenase family member 9, mitochondrial [OS=Homo sapiens]	1.42009	0.999	1.23676	1.13402	0.716	1.4418	0.0047104	0.039595	Enriched	Rejected
O75832	26S proteasome non-ATPase regulatory subunit 10 [OS=Homo sapiens]	1.37449	0.976	1.31645	1.16002	0.716	1.51016	0.0127006	0.0396299	Rejected	Rejected
P35606	Coatomer subunit beta' [OS=Homo sapiens]	1.7253	0.861	2.07909	1.34348	0.716	2.22193	0.0263084	0.0396648	Rejected	Rejected
P49736	DNA replication licensing factor mcm2 [OS=Homo sapiens]	1.80581	0.829	2.8863	4.17901	0.715	10.4829	0.0294836	0.0396997	Rejected	Rejected
Q9NTI5	Sister chromatid cohesion protein PDS5 homolog B [OS=Homo sapiens]	6.86227	0.922	7.55586	1.80096	0.713	6.3145	0.0198883	0.0397346	Rejected	Rejected
O14579-1	coatomer subunit epsilon [OS=Homo sapiens]	9.42369	0.914	12.1029	15.7606	0.713	37.1602	0.0211096	0.0397696	Rejected	Rejected
P08582-1	Melanotransferrin [OS=Homo sapiens]	0.742939	0.019	1.27617	1.15863	0.713	1.52624	0.0802512	0.0398045	Rejected	Rejected
Q93077	Histone H2A type 1-C [OS=Homo sapiens]	1.66351	0.681	2.23832	1.22107	0.712	1.70926	0.0408583	0.0398394	Rejected	Rejected
Q9UBF2	Coatomer subunit gamma-2 [OS=Homo sapiens]	0.735787	0.11	1.51412	1.19642	0.71	1.6476	0.0747383	0.0398743	Rejected	Rejected
Q9UBT2	SUMO-activating enzyme subunit 2 [OS=Homo sapiens]	0.639755	0.38	3.04206	1.50074	0.709	1.97733	0.0605024	0.0399092	Rejected	Rejected
P61006	Ras-related protein Rab-8A [OS=Homo sapiens]	2.38	0.992	2.14815	1.91944	0.708	2.36455	0.00826936	0.0399441	Enriched	Rejected
Q08380	Galectin-3-binding protein [OS=Homo sapiens]	1.3042	0.915	1.3632	1.10246	0.708	1.32232	0.0210049	0.0399791	Rejected	Rejected
Q16658	Fascin [OS=Homo sapiens]	1.30899	0.952	1.30027	1.13571	0.707	1.44923	0.0162247	0.040014	Rejected	Rejected
Q7Z4H3-1	HD domain-containing protein 2 [OS=Homo sapiens]	1.2271	0.88	1.3471	1.1084	0.707	1.31843	0.0244941	0.0400489	Rejected	Rejected
Q14137	Ribosome biogenesis protein BOP1 [OS=Homo sapiens]	0.698342	0.306	2.04608	1.33185	0.706	2.00517	0.064515	0.0400838	Rejected	Rejected
O15143	Actin-related protein 2/3 complex subunit 1B [OS=Homo sapiens]	1.31837	0.822	1.53626	1.17731	0.705	1.66719	0.0300419	0.0401187	Rejected	Rejected
Q96ER3	protein saal1 [OS=Homo sapiens]	2.33095	0.781	3.02251	1.30917	0.705	2.12226	0.0333915	0.0401536	Rejected	Rejected
P30050-1	60S ribosomal protein L12 [OS=Homo sapiens]	0.679131	0.274	2.87574	1.25102	0.705	1.83231	0.0659805	0.0401885	Rejected	Rejected
Q9NW82	WD repeat-containing protein 70 [OS=Homo sapiens]	0.806815	0.201	1.53591	1.10752	0.703	1.35995	0.0697139	0.0402235	Rejected	Rejected
Q96AB3-2	Isoform 2 of Isochorismatase domain-containing protein 2 [OS=Homo sapiens]	1.21026	0.749	1.59306	1.12053	0.702	1.40149	0.036113	0.0402584	Rejected	Rejected
Q16513	Serine/threonine-protein kinase N2 [OS=Homo sapiens]	0.548386	0.024	1.54531	1.09136	0.702	1.57634	0.0799372	0.0402933	Rejected	Rejected
Q9Y3I0	tRNA-splicing ligase RtcB homolog [OS=Homo sapiens]	3.33546	0.887	7.5783	2.18887	0.7	4.40322	0.0238311	0.0403282	Rejected	Rejected
Q99959	Plakophilin-2 [OS=Homo sapiens]	0.787182	0.097	1.35433	1.15072	0.7	1.5582	0.0752268	0.0403631	Rejected	Rejected
P98179	RNA-binding protein 3 [OS=Homo sapiens]	2.43829	0.777	2.97019	2.34587	0.697	2.94441	0.0340893	0.040398	Rejected	Rejected
P23919	thymidylate kinase [OS=Homo sapiens]	8.80884	0.925	9.88896	2.66397	0.696	3.22826	0.0195394	0.040433	Rejected	Rejected
Q9H9A6	Leucine-rich repeat-containing protein 40 [OS=Homo sapiens]	0.737476	0.097	1.43769	1.04868	0.696	1.16167	0.0752617	0.0404679	Rejected	Rejected
P62857	40S ribosomal protein S28 [OS=Homo sapiens]	1.36688	0.83	1.65133	1.27128	0.695	2.09015	0.0293091	0.0405028	Rejected	Rejected
O00170	AH receptor-interacting protein [OS=Homo sapiens]	1.22654	0.78	1.49699	1.13909	0.695	1.43278	0.0336706	0.0405377	Rejected	Rejected
Q16204	coiled-coil domain-containing protein 6 [OS=Homo sapiens]	1.28272	0.618	6.12278	1.86116	0.695	2.29806	0.0456036	0.0405726	Rejected	Rejected
Q12972-1	Nuclear inhibitor of protein phosphatase 1 [OS=Homo sapiens]	0.810121	0.163	1.38788	1.08224	0.695	1.27694	0.0717027	0.0406075	Rejected	Rejected
Q9NY27	Serine/threonine-protein phosphatase 4 regulatory subunit 2 [OS=Homo sapiens]	0.993472	0.508	1.28509	1.10602	0.693	1.3731	0.0532798	0.0406425	Rejected	Rejected
P62633-1	Cellular nucleic acid-binding protein [OS=Homo sapiens]	0.912945	0.343	1.35942	1.10898	0.692	1.36628	0.0627006	0.0406774	Rejected	Rejected
Q92979	Ribosomal RNA small subunit methyltransferase Nep1 [OS=Homo sapiens]	0.838488	0.265	1.42451	1.69776	0.692	2.02136	0.0668528	0.0407123	Rejected	Rejected
P49902	Cytosolic purine 5'-nucleotidase [OS=Homo sapiens]	1.04147	0.555	1.61055	1.10177	0.691	1.38001	0.0504885	0.0407472	Rejected	Rejected
Q12849	G-rich sequence factor 1 [OS=Homo sapiens]	0.87039	0.358	8.76303	2.50326	0.691	3.67622	0.0618283	0.0407821	Rejected	Rejected
Q29RF7-1	Sister chromatid cohesion protein PDS5 homolog A [OS=Homo sapiens]	0.866042	0.343	1.46765	1.14037	0.691	1.63529	0.0627355	0.040817	Rejected	Rejected
Q9BWM7	Sideroflexin-3 [OS=Homo sapiens]	1.27139	0.843	1.44842	1.1473	0.69	1.53607	0.0281228	0.040852	Rejected	Rejected
Q6Y1H2	Very-long-chain (3R)-3-hydroxyacyl-CoA dehydratase 2 [OS=Homo sapiens]	1.0479	0.607	1.33775	1.09365	0.689	1.39257	0.0463015	0.0408869	Rejected	Rejected
Q8NCG7	Sn1-specific diacylglycerol lipase beta [OS=Homo sapiens]	0.831926	0.177	1.39304	1.11149	0.689	1.33766	0.0708653	0.0409218	Rejected	Rejected
P08648	Integrin alpha-5 [OS=Homo sapiens]	0.903832	0.349	1.43326	1.14452	0.688	1.49749	0.0623866	0.0409567	Rejected	Rejected
Q96NY7-1	Chloride intracellular channel protein 6 [OS=Homo sapiens]	0.835227	0.073	1.24476	1.11372	0.688	1.35077	0.0769016	0.0409916	Rejected	Rejected
Q86VP6-1	cullin-associated nedd8-dissociated protein 1 [OS=Homo sapiens]	1.25463	0.858	1.40555	1.47459	0.685	2.73813	0.0266225	0.0410265	Rejected	Rejected
Q9H814	Phosphorylated adapter RNA export protein [OS=Homo sapiens]	1.17806	0.699	1.75019	1.10981	0.685	1.38972	0.0397767	0.0410615	Rejected	Rejected
Q9BZK7	F-box-like/WD repeat-containing protein TBL1XR1 [OS=Homo sapiens]	1.02695	0.524	1.48993	1.17398	0.684	1.56574	0.0523726	0.0410964	Rejected	Rejected
P36542-1	ATP synthase subunit gamma, mitochondrial [OS=Homo sapiens]	0.403707	0.36	3.39275	1.17892	0.684	1.61947	0.0616539	0.0411313	Rejected	Rejected
Q9HCU5	Prolactin regulatory element-binding protein [OS=Homo sapiens]	1.16704	0.79	1.36623	1.07793	0.683	1.44487	0.0324145	0.0411662	Rejected	Rejected
Q9BW60	Elongation of very long chain fatty acids protein 1 [OS=Homo sapiens]	0.668488	0.051	1.51607	1.07946	0.682	1.32509	0.0781577	0.0412011	Rejected	Rejected
Q86VM9	Zinc finger CCCH domain-containing protein 18 [OS=Homo sapiens]	1.67133	0.65	2.65727	1.47851	0.681	2.06041	0.042917	0.041236	Rejected	Rejected
Q15024	Exosome complex component RRP42 [OS=Homo sapiens]	1.85019	0.915	1.91008	1.12713	0.68	1.48065	0.02097	0.0412709	Rejected	Rejected
P08621-1	U1 small nuclear ribonucleoprotein 70 kDa [OS=Homo sapiens]	1.04859	0.536	1.66364	1.19238	0.68	2.77403	0.0515701	0.0413059	Rejected	Rejected
Q9UHY1	Nuclear receptor-binding protein [OS=Homo sapiens]	1.11616	0.665	1.50495	1.13351	0.677	1.5087	0.0418353	0.0413408	Rejected	Rejected
P33316-3	Deoxyuridine 5'-triphosphate nucleotidohydrolase, mitochondrial [OS=Homo sapiens]	3.35803	0.923	3.8121	2.12975	0.676	4.58455	0.0198186	0.0413757	Rejected	Rejected
O95793	double-stranded RNA-binding protein Staufen homolog 1 [OS=Homo sapiens]	3.58354	0.908	4.19441	1.23169	0.676	2.82499	0.0215632	0.0414106	Rejected	Rejected
Q13561-2	Isoform 2 of Dynactin subunit 2 [OS=Homo sapiens]	2.02616	0.737	6.66062	1.47027	0.676	4.00229	0.0368109	0.0414455	Rejected	Rejected
P12268	inosine-5'-monophosphate dehydrogenase 2 [OS=Homo sapiens]	0.69838	0.129	1.73356	1.14787	0.676	1.66444	0.0738311	0.0414804	Rejected	Rejected
O43615	Mitochondrial import inner membrane translocase subunit TIM44 [OS=Homo sapiens]	2.08225	0.946	2.10399	1.30948	0.675	1.62017	0.0172017	0.0415154	Rejected	Rejected
Q14974	Importin subunit beta-1 [OS=Homo sapiens]	1.27267	0.811	1.51003	1.25585	0.675	1.68646	0.0308444	0.0415503	Rejected	Rejected
Q13595-1	Transformer-2 protein homolog alpha [OS=Homo sapiens]	1.50966	0.694	2.03355	1.12703	0.675	1.5201	0.0400558	0.0415852	Rejected	Rejected
O15347	High mobility group protein B3 [OS=Homo sapiens]	0.626847	0.181	2.01157	2.04131	0.675	3.79813	0.0705513	0.0416201	Rejected	Rejected
P61457	Pterin-4-alpha-carbinolamine dehydratase [OS=Homo sapiens]	0.819845	0.222	1.53951	1.1393	0.673	1.5623	0.0690161	0.041655	Rejected	Rejected
P62249	40S ribosomal protein S16 [OS=Homo sapiens]	0.377053	0.036	2.54958	1.34669	0.673	1.99695	0.0790649	0.0416899	Rejected	Rejected
Q8IXB1-1	DnaJ homolog subfamily C member 10 [OS=Homo sapiens]	1.06024	0.604	1.46987	1.08691	0.672	1.36495	0.0465806	0.0417249	Rejected	Rejected
P31040	Succinate dehydrogenase [ubiquinone] flavoprotein subunit, mitochondrial [OS=Homo sapiens]	1.24886	0.568	2.58886	1.23692	0.672	2.14484	0.0494417	0.0417598	Rejected	Rejected
Q7LG56-6	Isoform 6 of Ribonucleoside-diphosphate reductase subunit M2 B [OS=Homo sapiens]	1.24452	0.567	3.65292	1.51028	0.671	2.29668	0.0496162	0.0417947	Rejected	Rejected
Q10567-3	Isoform C of AP-1 complex subunit beta-1 [OS=Homo sapiens]	0.834824	0.116	1.28677	1.0711	0.671	1.30168	0.074529	0.0418296	Rejected	Rejected
Q9NVP1	ATP-dependent RNA helicase DDX18 [OS=Homo sapiens]	2.42792	0.978	1.90632	1.12581	0.67	1.586	0.0121424	0.0418645	Rejected	Rejected
P55196-5	Isoform 5 of Afadin [OS=Homo sapiens]	1.37471	0.934	1.39228	1.12641	0.67	1.47525	0.0186322	0.0418994	Rejected	Rejected
Q9UBE0-1	SUMO-activating enzyme subunit 1 [OS=Homo sapiens]	4.46934	0.858	5.97598	2.12866	0.67	6.80934	0.0267271	0.0419344	Rejected	Rejected
Q9NUU7	ATP-dependent RNA helicase DDX19A [OS=Homo sapiens]	1.24532	0.761	1.54211	1.10712	0.67	1.38536	0.0353454	0.0419693	Rejected	Rejected
Q13257-1	Mitotic spindle assembly checkpoint protein MAD2A [OS=Homo sapiens]	1.57522	0.499	2.50705	1.78385	0.67	5.74003	0.0536985	0.0420042	Rejected	Rejected
Q96RP9	Elongation factor G, mitochondrial [OS=Homo sapiens]	0.918575	0.446	2.48796	1.36004	0.67	3.1886	0.0568737	0.0420391	Rejected	Rejected
O43488	aflatoxin B1 aldehyde reductase member 2 [OS=Homo sapiens]	0.786708	0.113	1.32842	1.08441	0.669	1.38838	0.0746685	0.042074	Rejected	Rejected
Q13442	28 kDa heat- and acid-stable phosphoprotein [OS=Homo sapiens]	0.283069	0.129	4.45475	1.89076	0.668	3.16799	0.073866	0.0421089	Rejected	Rejected
P12236	ADP/ATP translocase 3 [OS=Homo sapiens]	2.21794	0.865	2.43448	1.11055	0.667	1.53254	0.02582	0.0421439	Rejected	Rejected
P30042-1	ES1 protein homolog, mitochondrial [OS=Homo sapiens]	1.6087	0.716	2.05004	1.16657	0.667	1.7783	0.0384857	0.0421788	Rejected	Rejected
P61758	Prefoldin subunit 3 [OS=Homo sapiens]	0.287658	0.002	2.41247	1.78391	0.666	2.47543	0.0812631	0.0422137	Rejected	Rejected
Q9HCE1	Putative helicase MOV-10 [OS=Homo sapiens]	0.958735	0.399	1.40698	1.03964	0.665	1.22735	0.0593859	0.0422486	Rejected	Rejected
Q09028	Histone-binding protein RBBP4 [OS=Homo sapiens]	1.34853	0.957	1.33653	1.12766	0.664	1.53727	0.0156664	0.0422835	Rejected	Rejected
Q8WVM8	Sec1 family domain-containing protein 1 [OS=Homo sapiens]	89.4703	0.793	112.285	2.85552	0.664	41.9882	0.0321005	0.0423184	Rejected	Rejected
Q92878-2	Isoform 2 of DNA repair protein RAD50 [OS=Homo sapiens]	1.08536	0.63	4.18892	1.32261	0.664	2.50832	0.0443475	0.0423534	Rejected	Rejected
P62316	Small nuclear ribonucleoprotein Sm D2 [OS=Homo sapiens]	2.42925	0.894	2.67407	1.28654	0.663	3.11372	0.0231333	0.0423883	Rejected	Rejected
P35241-5	Isoform 5 of Radixin [OS=Homo sapiens]	3.31975	0.83	46.8522	1.46284	0.662	3.93298	0.0292742	0.0424232	Rejected	Rejected
P11172	uridine 5'-monophosphate synthase [OS=Homo sapiens]	1.1654	0.76	1.44301	1.10092	0.662	1.46177	0.0354152	0.0424581	Rejected	Rejected
P04181-1	Ornithine aminotransferase, mitochondrial [OS=Homo sapiens]	7.71504	0.943	7.9349	1.13506	0.661	1.6608	0.0174808	0.042493	Rejected	Rejected
Q02218	2-oxoglutarate dehydrogenase, mitochondrial [OS=Homo sapiens]	0.893619	0.234	1.30238	1.12409	0.661	1.58431	0.0684229	0.0425279	Rejected	Rejected
Q9BQ39	ATP-dependent RNA helicase DDX50 [OS=Homo sapiens]	0.75083	0.108	1.42667	5.48793	0.661	9.87945	0.0748779	0.0425628	Rejected	Rejected
P51665	26S proteasome non-ATPase regulatory subunit 7 [OS=Homo sapiens]	3.58433	0.967	3.46327	1.2713	0.66	1.55986	0.0142359	0.0425978	Rejected	Rejected
Q9H223	EH domain-containing protein 4 [OS=Homo sapiens]	0.902601	0.454	1.8914	1.15548	0.66	1.69106	0.056455	0.0426327	Rejected	Rejected
Q9UBQ0-2	Isoform 2 of Vacuolar protein sorting-associated protein 29 [OS=Homo sapiens]	1.32806	0.87	1.49351	1.03797	0.659	1.16234	0.0254013	0.0426676	Rejected	Rejected
P41250	Glycine--tRNA ligase [OS=Homo sapiens]	4.50153	0.849	10.0948	1.82519	0.658	31.3236	0.0276343	0.0427025	Rejected	Rejected
Q6ZRP7	Sulfhydryl oxidase 2 [OS=Homo sapiens]	0.949601	0.355	1.23844	1.10634	0.658	1.46407	0.0620726	0.0427374	Rejected	Rejected
P27635	60S ribosomal protein L10 [OS=Homo sapiens]	0.547222	0.266	4.84483	1.80031	0.658	24.2615	0.0667481	0.0427723	Rejected	Rejected
Q92841	Probable ATP-dependent RNA helicase DDX17 [OS=Homo sapiens]	3.07512	0.955	3.05106	1.22216	0.656	2.47551	0.0159107	0.0428073	Rejected	Rejected
P61204	ADP-ribosylation factor 3 [OS=Homo sapiens]	1.18357	0.744	1.4475	2.10682	0.656	4.19499	0.036462	0.0428422	Rejected	Rejected
P40763	Signal transducer and activator of transcription 3 [OS=Homo sapiens]	1.69153	0.606	4.55648	2.0191	0.656	3.44679	0.0463364	0.0428771	Rejected	Rejected
P14859-6	Isoform 6 of POU domain, class 2, transcription factor 1 [OS=Homo sapiens]	0.951564	0.472	2.46896	1.08548	0.656	1.41148	0.0552338	0.042912	Rejected	Rejected
P60510	Serine/threonine-protein phosphatase 4 catalytic subunit [OS=Homo sapiens]	1.21639	0.919	1.24235	1.07632	0.655	1.36604	0.0205164	0.0429469	Rejected	Rejected
O00442-2	Isoform 2 of RNA 3'-terminal phosphate cyclase [OS=Homo sapiens]	1.04083	0.628	1.21614	1.07195	0.655	1.46767	0.0446267	0.0429818	Rejected	Rejected
Q8N1G4	Leucine-rich repeat-containing protein 47 [OS=Homo sapiens]	1.38858	0.963	1.35355	1.08824	0.654	1.3925	0.0149337	0.0430168	Rejected	Rejected
Q04206	Transcription factor p65 [OS=Homo sapiens]	0.553808	0.067	1.80814	1.85462	0.654	2.55229	0.077111	0.0430517	Rejected	Rejected
Q8N684-3	Isoform 3 of Cleavage and polyadenylation specificity factor subunit 7 [OS=Homo sapiens]	1.43628	0.647	2.66088	1.30094	0.653	2.5096	0.0430914	0.0430866	Rejected	Rejected
Q9H2U1	ATP-dependent RNA helicase DHX36 [OS=Homo sapiens]	0.989126	0.497	1.16458	1.22919	0.653	3.14063	0.0539428	0.0431215	Rejected	Rejected
Q96HJ9-2	Isoform 2 of UPF0562 protein C7orf55 [OS=Homo sapiens]	1.03016	0.58	1.2812	2.0967	0.652	5.26393	0.0483601	0.0431564	Rejected	Rejected
Q6GMV2	SET and MYND domain-containing protein 5 [OS=Homo sapiens]	0.882184	0.325	1.60895	1.07967	0.652	1.42909	0.063538	0.0431913	Rejected	Rejected
Q9NZL4-3	Isoform 3 of Hsp70-binding protein 1 [OS=Homo sapiens]	0.607567	0.181	1.82329	1.13887	0.652	1.72531	0.0705164	0.0432263	Rejected	Rejected
P15924-1	Desmoplakin [OS=Homo sapiens]	0.858075	0.331	1.66377	1.17968	0.651	1.69724	0.0633985	0.0432612	Rejected	Rejected
P30405	Peptidyl-prolyl cis-trans isomerase F, mitochondrial [OS=Homo sapiens]	0.28515	0.053	3.608	1.05584	0.65	1.27664	0.0779833	0.0432961	Rejected	Rejected
Q8N3U4-2	Isoform 2 of Cohesin subunit SA-2 [OS=Homo sapiens]	0.221409	0.02	4.2524	1.26786	0.65	2.24537	0.0801465	0.043331	Rejected	Rejected
Q53GS9	U4/U6.U5 tri-snRNP-associated protein 2 [OS=Homo sapiens]	0.765577	0.43	1.88324	1.10064	0.649	1.49156	0.0575017	0.0433659	Rejected	Rejected
O43148-2	Isoform 2 of mRNA cap guanine-N7 methyltransferase [OS=Homo sapiens]	1.93519	0.773	4.24662	1.52605	0.648	3.89861	0.0344382	0.0434008	Rejected	Rejected
Q06587	E3 ubiquitin-protein ligase RING1 [OS=Homo sapiens]	0.950244	0.406	1.30503	1.07	0.648	1.41268	0.0587579	0.0434358	Rejected	Rejected
Q56VL3	OCIA domain-containing protein 2 [OS=Homo sapiens]	1.12471	0.724	1.39327	1.1296	0.647	1.52851	0.037753	0.0434707	Rejected	Rejected
Q9BZZ5-2	Isoform 2 of Apoptosis inhibitor 5 [OS=Homo sapiens]	0.906553	0.366	1.43576	1.3004	0.646	1.71001	0.061305	0.0435056	Rejected	Rejected
P23284	peptidyl-prolyl cis-trans isomerase B [OS=Homo sapiens]	0.542566	0.148	2.52497	1.20418	0.645	2.37883	0.0724703	0.0435405	Rejected	Rejected
P05455	Lupus La protein [OS=Homo sapiens]	0.649147	0.135	2.00492	1.21136	0.645	2.40012	0.0734124	0.0435754	Rejected	Rejected
Q9UHI6	Probable ATP-dependent RNA helicase DDX20 [OS=Homo sapiens]	0.726981	0.09	1.50549	1.09765	0.645	1.4473	0.0757851	0.0436103	Rejected	Rejected
P49711-1	Transcriptional repressor CTCF [OS=Homo sapiens]	0.824842	0.17	1.39742	1.08872	0.644	1.53556	0.0712491	0.0436453	Rejected	Rejected
Q15287-1	RNA-binding protein with serine-rich domain 1 [OS=Homo sapiens]	0.328879	0.026	2.7241	1.11035	0.644	2.07479	0.0797976	0.0436802	Rejected	Rejected
P08240-1	signal recognition particle receptor subunit alpha [OS=Homo sapiens]	1.0826	0.635	1.41809	1.11489	0.643	2.44252	0.0439288	0.0437151	Rejected	Rejected
P22570-3	Isoform 3 of NADPH:adrenodoxin oxidoreductase, mitochondrial [OS=Homo sapiens]	1.07455	0.582	1.94006	1.10858	0.643	1.56374	0.0481856	0.04375	Rejected	Rejected
P49720	proteasome subunit beta type-3 [OS=Homo sapiens]	1.43204	0.796	2.0174	1.12336	0.642	1.9138	0.0318562	0.0437849	Rejected	Rejected
Q15007	Pre-mRNA-splicing regulator WTAP [OS=Homo sapiens]	1.21179	0.911	1.26333	1.05612	0.641	1.36102	0.0213538	0.0438198	Rejected	Rejected
P50750-2	Isoform 2 of Cyclin-dependent kinase 9 [OS=Homo sapiens]	1.09727	0.748	1.23426	1.1308	0.641	1.58783	0.0361828	0.0438547	Rejected	Rejected
O00299	chloride intracellular channel protein 1 [OS=Homo sapiens]	0.511779	0.21	3.20495	1.34228	0.641	2.88006	0.0695743	0.0438897	Rejected	Rejected
P06493	Cyclin-dependent kinase 1 [OS=Homo sapiens]	0.723464	0.272	2.71165	1.16911	0.64	1.98931	0.0661898	0.0439246	Rejected	Rejected
O75083	WD repeat-containing protein 1 [OS=Homo sapiens]	0.533051	0.137	2.25592	1.13426	0.64	2.52532	0.0732729	0.0439595	Rejected	Rejected
Q92879-4	Isoform 4 of CUGBP Elav-like family member 1 [OS=Homo sapiens]	0.351616	0.003	2.13894	1.69345	0.64	2.99113	0.0810886	0.0439944	Rejected	Rejected
Q70J99-3	Isoform 3 of Protein unc-13 homolog D [OS=Homo sapiens]	1.51517	0.974	1.48679	1.10991	0.639	1.60685	0.0130495	0.0440293	Rejected	Rejected
P68431	Histone H3.1 [OS=Homo sapiens]	8.32269	0.84	9.87237	1.64889	0.639	8.34643	0.0283322	0.0440642	Rejected	Rejected
P07951-1	Tropomyosin beta chain [OS=Homo sapiens]	1.12207	0.759	1.32241	1.08076	0.639	1.55456	0.0354501	0.0440992	Rejected	Rejected
Q6P9B6	TLD domain-containing protein 1 [OS=Homo sapiens]	1.2984	0.949	1.30258	1.06173	0.638	1.36955	0.0168179	0.0441341	Rejected	Rejected
Q6NUK1	Calcium-binding mitochondrial carrier protein SCaMC-1 [OS=Homo sapiens]	2.19053	0.697	3.49715	2.03479	0.638	2.46116	0.0399163	0.044169	Rejected	Rejected
Q9UN86	Ras GTPase-activating protein-binding protein 2 [OS=Homo sapiens]	0.990678	0.462	6.40118	1.2521	0.638	2.73035	0.0559665	0.0442039	Rejected	Rejected
Q9NTJ5	Phosphatidylinositide phosphatase SAC1 [OS=Homo sapiens]	0.964602	0.449	1.44987	1.08178	0.638	1.32866	0.0566643	0.0442388	Rejected	Rejected
Q7L2H7	Eukaryotic translation initiation factor 3 subunit M [OS=Homo sapiens]	0.912832	0.448	4.44388	1.21898	0.638	3.7929	0.0566992	0.0442737	Rejected	Rejected
P61803	Dolichyl-diphosphooligosaccharide--protein glycosyltransferase subunit DAD1 [OS=Homo sapiens]	1.62618	0.784	2.60307	1.1098	0.635	1.56505	0.0331124	0.0443087	Rejected	Rejected
P19623	spermidine synthase [OS=Homo sapiens]	1.21689	0.543	2.40919	1.08936	0.635	1.41059	0.0513957	0.0443436	Rejected	Rejected
Q99747	Gamma-soluble NSF attachment protein [OS=Homo sapiens]	1.05884	0.622	1.32567	1.08185	0.633	1.4272	0.0452198	0.0443785	Rejected	Rejected
Q8TC12	Retinol dehydrogenase 11 [OS=Homo sapiens]	0.889593	0.299	1.37703	1.08485	0.633	1.43676	0.0648988	0.0444134	Rejected	Rejected
Q9BW19	Kinesin-like protein KIFC1 [OS=Homo sapiens]	0.834007	0.185	1.35301	1.04971	0.633	1.37684	0.0704466	0.0444483	Rejected	Rejected
Q9Y3B8-1	Oligoribonuclease, mitochondrial [OS=Homo sapiens]	4.22208	0.989	2.69856	1.14807	0.632	2.25313	0.00917655	0.0444832	Rejected	Rejected
Q8IWA0	WD repeat-containing protein 75 [OS=Homo sapiens]	0.957784	0.456	1.37678	1.03309	0.632	1.14404	0.0563154	0.0445182	Rejected	Rejected
P30086	phosphatidylethanolamine-binding protein 1 [OS=Homo sapiens]	0.658215	0.36	3.4412	1.2617	0.632	2.94734	0.0615841	0.0445531	Rejected	Rejected
P30876	DNA-directed RNA polymerase II subunit RPB2 [OS=Homo sapiens]	3.35439	1	1.78199	1.08284	0.631	1.52448	0.00286113	0.044588	Enriched	Rejected
Q9Y3B7-1	39S ribosomal protein L11, mitochondrial [OS=Homo sapiens]	1.46982	0.966	1.43877	1.05024	0.631	1.25692	0.0146197	0.0446229	Rejected	Rejected
P78417	Glutathione S-transferase omega-1 [OS=Homo sapiens]	0.559564	0.151	2.60006	1.08342	0.631	1.58035	0.0723308	0.0446578	Rejected	Rejected
Q15833-3	Isoform 3 of Syntaxin-binding protein 2 [OS=Homo sapiens]	1.11014	0.816	1.19272	1.0635	0.63	1.3892	0.0304955	0.0446927	Rejected	Rejected
P55263-1	Adenosine kinase [OS=Homo sapiens]	1.34293	0.72	2.56217	1.07396	0.63	1.36181	0.0379623	0.0447277	Rejected	Rejected
Q15434	RNA-binding motif, single-stranded-interacting protein 2 [OS=Homo sapiens]	1.58281	0.95	1.58284	1.09105	0.629	1.47349	0.0167481	0.0447626	Rejected	Rejected
P24941-1	cyclin-dependent kinase 2 [OS=Homo sapiens]	2.35267	0.86	6.24328	1.0891	0.628	1.34314	0.0265178	0.0447975	Rejected	Rejected
P52209	6-phosphogluconate dehydrogenase, decarboxylating [OS=Homo sapiens]	1.74629	0.986	1.51767	1.072	0.627	1.43519	0.0100837	0.0448324	Rejected	Rejected
O75683	Surfeit locus protein 6 [OS=Homo sapiens]	1.0932	0.683	1.36307	1.07876	0.627	1.22601	0.0407537	0.0448673	Rejected	Rejected
Q969G6	Riboflavin kinase [OS=Homo sapiens]	1.57036	0.702	6.75262	2.30704	0.626	2.92833	0.0395324	0.0449022	Rejected	Rejected
Q10713	Mitochondrial-processing peptidase subunit alpha [OS=Homo sapiens]	1.49679	0.997	1.30127	1.06073	0.625	1.28293	0.00621075	0.0449372	Enriched	Rejected
P11047	Laminin subunit gamma-1 [OS=Homo sapiens]	1.1218	0.64	2.36858	1.20474	0.625	2.77828	0.0436497	0.0449721	Rejected	Rejected
Q6UWP8-1	Suprabasin [OS=Homo sapiens]	0.907554	0.395	1.7698	1.36265	0.624	3.49487	0.0597348	0.045007	Rejected	Rejected
O14745	Na(+)/H(+) exchange regulatory cofactor NHE-RF1 [OS=Homo sapiens]	0.891395	0.37	1.60579	1.04019	0.623	1.2822	0.0612003	0.0450419	Rejected	Rejected
Q5RI15-2	Isoform 2 of Cytochrome c oxidase protein 20 homolog [OS=Homo sapiens]	0.7634	0.132	1.47215	1.0895	0.623	1.54314	0.0737264	0.0450768	Rejected	Rejected
O15397-1	Importin-8 [OS=Homo sapiens]	0.543603	0.078	1.86059	1.08216	0.623	1.70998	0.076448	0.0451117	Rejected	Rejected
Q15428	splicing factor 3a subunit 2 [OS=Homo sapiens]	0.84849	0.321	2.42948	1.05104	0.622	1.3309	0.0638521	0.0451466	Rejected	Rejected
O75616-1	GTPase Era, mitochondrial [OS=Homo sapiens]	1.24509	0.752	1.58868	1.22928	0.621	1.74057	0.0359037	0.0451816	Rejected	Rejected
Q9H8Y8-3	Isoform 3 of Golgi reassembly-stacking protein 2 [OS=Homo sapiens]	2.57839	0.55	4.38293	5.16679	0.621	6.80952	0.0508374	0.0452165	Rejected	Rejected
P29992	guanine nucleotide-binding protein subunit alpha-11 [OS=Homo sapiens]	0.259231	0.377	5.36959	1.63697	0.621	2.0132	0.0607467	0.0452514	Rejected	Rejected
Q9UNF0	Protein kinase C and casein kinase substrate in neurons protein 2 [OS=Homo sapiens]	0.706706	0.048	1.43522	1.04802	0.621	1.24345	0.078402	0.0452863	Rejected	Rejected
O76021	Ribosomal L1 domain-containing protein 1 [OS=Homo sapiens]	1.01618	0.486	79.8051	1.53355	0.619	4.54463	0.0546057	0.0453212	Rejected	Rejected
Q9NVA2-2	Isoform 2 of Septin-11 [OS=Homo sapiens]	1.35138	0.956	1.32962	1.08174	0.618	1.49079	0.0158409	0.0453561	Rejected	Rejected
O95239-1	Chromosome-associated kinesin KIF4A [OS=Homo sapiens]	1.3941	0.748	1.69521	1.05081	0.618	1.27923	0.0361479	0.0453911	Rejected	Rejected
Q9ULV4-3	Isoform 3 of Coronin-1C [OS=Homo sapiens]	0.879789	0.411	2.27818	1.18675	0.618	2.23475	0.0584089	0.045426	Rejected	Rejected
Q9H2P0	Activity-dependent neuroprotector homeobox protein [OS=Homo sapiens]	1.49529	0.941	1.53361	1.08839	0.616	1.57189	0.0178297	0.0454609	Rejected	Rejected
Q93084-5	Isoform SERCA3E of Sarcoplasmic/endoplasmic reticulum calcium ATPase 3 [OS=Homo sapiens]	39.9962	0.94	40.181	1.09418	0.616	1.65376	0.0179693	0.0454958	Rejected	Rejected
O00487	26S proteasome non-ATPase regulatory subunit 14 [OS=Homo sapiens]	1.54205	0.7	2.26156	1.31903	0.616	2.82185	0.0396371	0.0455307	Rejected	Rejected
Q05048	Cleavage stimulation factor subunit 1 [OS=Homo sapiens]	0.635044	0.252	1.87998	1.24118	0.615	4.90955	0.0676553	0.0455656	Rejected	Rejected
P82930	28S ribosomal protein S34, mitochondrial [OS=Homo sapiens]	0.76117	0.07	1.35628	1.09382	0.615	1.49746	0.0769714	0.0456006	Rejected	Rejected
P09874	Poly [ADP-ribose] polymerase 1 [OS=Homo sapiens]	3.09618	0.985	2.42433	1.13803	0.613	2.02905	0.0103978	0.0456355	Rejected	Rejected
P28331-2	Isoform 2 of NADH-ubiquinone oxidoreductase 75 kDa subunit, mitochondrial [OS=Homo sapiens]	1.80028	0.755	3.11059	1.15132	0.613	2.27619	0.0356943	0.0456704	Rejected	Rejected
P22735	Protein-glutamine gamma-glutamyltransferase K [OS=Homo sapiens]	1.11935	0.679	1.59195	1.15895	0.613	2.19195	0.0410328	0.0457053	Rejected	Rejected
Q13347	Eukaryotic translation initiation factor 3 subunit I [OS=Homo sapiens]	0.832228	0.351	2.19429	2.26703	0.612	5.33701	0.062247	0.0457402	Rejected	Rejected
P19367-3	Isoform 3 of Hexokinase-1 [OS=Homo sapiens]	0.533094	0.135	2.99796	1.1416	0.612	1.8917	0.0734473	0.0457751	Rejected	Rejected
Q15021	condensin complex subunit 1 [OS=Homo sapiens]	3.3175	1	1.63484	1.74538	0.611	2.66138	0.00157013	0.0458101	Enriched	Rejected
Q9NS86	lanC-like protein 2 [OS=Homo sapiens]	1.07732	0.618	1.27827	1.09613	0.611	1.63362	0.0456385	0.045845	Rejected	Rejected
P27824-2	Isoform 2 of Calnexin [OS=Homo sapiens]	0.717314	0.259	2.3474	1.09573	0.611	1.78558	0.0671319	0.0458799	Rejected	Rejected
O00233-1	26S proteasome non-ATPase regulatory subunit 9 [OS=Homo sapiens]	1.38976	0.929	1.43902	1.07858	0.61	1.64098	0.0192952	0.0459148	Rejected	Rejected
Q9NRL2	Bromodomain adjacent to zinc finger domain protein 1A [OS=Homo sapiens]	0.738873	0.14	1.61184	1.0925	0.61	1.43031	0.0729588	0.0459497	Rejected	Rejected
P00491	purine nucleoside phosphorylase [OS=Homo sapiens]	1.57371	0.591	2.83543	2.48057	0.609	19.2492	0.0476971	0.0459846	Rejected	Rejected
Q96GQ7	Probable ATP-dependent RNA helicase DDX27 [OS=Homo sapiens]	1.98597	0.996	1.68493	1.11601	0.608	1.75556	0.0068388	0.0460196	Enriched	Rejected
Q96EE3-1	Isoform B of Nucleoporin SEH1 [OS=Homo sapiens]	2.38915	0.637	4.43365	4.19026	0.608	8.602	0.0438241	0.0460545	Rejected	Rejected
Q8IWZ3-6	Isoform 6 of Ankyrin repeat and KH domain-containing protein 1 [OS=Homo sapiens]	0.991344	0.464	1.2942	1.07221	0.608	1.44499	0.0558618	0.0460894	Rejected	Rejected
Q86XP3-1	ATP-dependent RNA helicase DDX42 [OS=Homo sapiens]	0.0810984	0.102	17.9432	1.42053	0.608	7.15518	0.0750872	0.0461243	Rejected	Rejected
P36543	V-type proton ATPase subunit E 1 [OS=Homo sapiens]	1.20004	0.788	1.38124	1.05351	0.607	1.2522	0.0326936	0.0461592	Rejected	Rejected
Q9NZL9	Methionine adenosyltransferase 2 subunit beta [OS=Homo sapiens]	1.00907	0.537	1.44337	1.11096	0.607	1.69529	0.0515003	0.0461941	Rejected	Rejected
Q8N7H5	RNA polymerase II-associated factor 1 homolog [OS=Homo sapiens]	1.00153	0.53	1.37358	1.03272	0.607	1.27753	0.0520935	0.0462291	Rejected	Rejected
Q96CS3	FAS-associated factor 2 [OS=Homo sapiens]	3.58366	0.935	3.76463	1.08743	0.606	1.6262	0.0185625	0.046264	Rejected	Rejected
Q9H2C0	Gigaxonin [OS=Homo sapiens]	1.1105	0.685	1.32389	1.10651	0.605	1.4164	0.0405443	0.0462989	Rejected	Rejected
Q96EK5	KIF1-binding protein [OS=Homo sapiens]	1.0349	0.558	1.45795	1.06212	0.605	1.31265	0.0502442	0.0463338	Rejected	Rejected
Q9NZJ9-2	Isoform 2 of Diphosphoinositol polyphosphate phosphohydrolase 2 [OS=Homo sapiens]	0.933762	0.35	1.35391	1.46131	0.605	2.12564	0.0622819	0.0463687	Rejected	Rejected
P62263	40S ribosomal protein S14 [OS=Homo sapiens]	2.09278	0.984	1.74521	1.101	0.604	1.67285	0.0107816	0.0464036	Rejected	Rejected
Q15643	Thyroid receptor-interacting protein 11 [OS=Homo sapiens]	0.882396	0.267	1.42106	1.84769	0.604	4.03038	0.0666783	0.0464385	Rejected	Rejected
Q8NI36	WD repeat-containing protein 36 [OS=Homo sapiens]	1.34051	0.907	1.45939	1.09784	0.603	1.51513	0.0216678	0.0464735	Rejected	Rejected
Q9Y295	developmentally-regulated GTP-binding protein 1 [OS=Homo sapiens]	6.76949	0.994	3.59759	1.09818	0.602	1.71909	0.0076762	0.0465084	Enriched	Rejected
Q12765-2	Isoform 2 of Secernin-1 [OS=Homo sapiens]	3.49026	0.942	3.57646	1.38389	0.602	2.40901	0.0176553	0.0465433	Rejected	Rejected
P68032	Actin, alpha cardiac muscle 1 [OS=Homo sapiens]	45.2889	0.863	83.3077	1.14754	0.602	1.9444	0.0259246	0.0465782	Rejected	Rejected
Q8TF68-1	Zinc finger protein 384 [OS=Homo sapiens]	1.1746	0.863	1.27214	1.05705	0.602	1.49176	0.0260293	0.0466131	Rejected	Rejected
Q92643	GPI-anchor transamidase [OS=Homo sapiens]	1.60508	0.95	1.60595	1.06553	0.601	1.46312	0.0167132	0.046648	Rejected	Rejected
P21399	Cytoplasmic aconitate hydratase [OS=Homo sapiens]	1.13946	0.595	2.22049	1.81915	0.6	5.47222	0.047418	0.046683	Rejected	Rejected
Q9Y5X2	Sorting nexin-8 [OS=Homo sapiens]	0.705075	0.076	1.47841	1.135	0.6	1.62871	0.076762	0.0467179	Rejected	Rejected
Q6P1X6	UPF0598 protein C8orf82 [OS=Homo sapiens]	1.56914	0.873	1.76967	1.86803	0.599	2.66322	0.025157	0.0467528	Rejected	Rejected
Q13409-1	cytoplasmic dynein 1 intermediate chain 2 [OS=Homo sapiens]	1.24666	0.824	1.32241	1.0581	0.599	1.41577	0.0299023	0.0467877	Rejected	Rejected
P84103	Serine/arginine-rich splicing factor 3 [OS=Homo sapiens]	1.76315	0.789	3.20765	1.13365	0.599	2.58013	0.0325541	0.0468226	Rejected	Rejected
Q15126	phosphomevalonate kinase [OS=Homo sapiens]	1.29813	0.871	1.45882	1.0261	0.598	1.21711	0.0253315	0.0468575	Rejected	Rejected
Q8WUK0	Phosphatidylglycerophosphatase and protein-tyrosine phosphatase 1 [OS=Homo sapiens]	1.08127	0.65	1.4413	1.06671	0.598	1.43434	0.0429518	0.0468925	Rejected	Rejected
Q9ULH1-1	Arf-GAP with SH3 domain, ANK repeat and PH domain-containing protein 1 [OS=Homo sapiens]	1.06523	0.672	1.17239	1.06549	0.597	1.41653	0.0415911	0.0469274	Rejected	Rejected
P78318	Immunoglobulin-binding protein 1 [OS=Homo sapiens]	1.31615	0.606	5.8449	1.10819	0.597	6.51682	0.0463712	0.0469623	Rejected	Rejected
Q9NRW3	DNA dC->dU-editing enzyme APOBEC-3C [OS=Homo sapiens]	3.76042	0.921	4.46644	1.46327	0.596	3.26768	0.0201326	0.0469972	Rejected	Rejected
Q9HC35	Echinoderm microtubule-associated protein-like 4 [OS=Homo sapiens]	1.09876	0.617	1.36826	1.05816	0.596	1.46974	0.0457083	0.0470321	Rejected	Rejected
Q15651-1	High mobility group nucleosome-binding domain-containing protein 3 [OS=Homo sapiens]	0.874185	0.238	1.38046	1.05788	0.596	1.44913	0.0681438	0.047067	Rejected	Rejected
P00568	Adenylate kinase isoenzyme 1 [OS=Homo sapiens]	0.24188	0.106	4.79756	1.88305	0.596	3.06524	0.0749128	0.047102	Rejected	Rejected
Q9H2P9-5	Isoform 5 of Diphthine methyl ester synthase [OS=Homo sapiens]	1.21055	0.675	1.62834	1.37549	0.595	1.65462	0.0413817	0.0471369	Rejected	Rejected
Q99436	Proteasome subunit beta type-7 [OS=Homo sapiens]	4.18136	0.903	5.35333	1.52195	0.594	9.16601	0.0221214	0.0471718	Rejected	Rejected
Q9NX74	tRNA-dihydrouridine(20) synthase [NAD(P)+]-like [OS=Homo sapiens]	1.17707	0.709	1.56758	1.03798	0.594	1.18836	0.0389393	0.0472067	Rejected	Rejected
Q53T59	HCLS1-binding protein 3 [OS=Homo sapiens]	0.349668	0.085	3.51945	1.21767	0.594	3.65159	0.0762387	0.0472416	Rejected	Rejected
Q9Y2U8	inner nuclear membrane protein Man1 [OS=Homo sapiens]	1.32681	0.91	1.39828	1.03263	0.592	1.27152	0.0214585	0.0472765	Rejected	Rejected
Q96QA5	gasdermin-A [OS=Homo sapiens]	0.741825	0.086	1.44812	1.0516	0.59	1.35386	0.0761689	0.0473115	Rejected	Rejected
Q8N1F7-1	Nuclear pore complex protein Nup93 [OS=Homo sapiens]	1.97819	0.87	2.4251	1.41697	0.588	2.15183	0.0253664	0.0473464	Rejected	Rejected
O15355	Protein phosphatase 1G [OS=Homo sapiens]	1.56188	0.777	2.41718	1.0313	0.587	1.46078	0.0340544	0.0473813	Rejected	Rejected
P46781	40S ribosomal protein S9 [OS=Homo sapiens]	0.97091	0.463	1.43344	1.3591	0.587	1.94094	0.0558967	0.0474162	Rejected	Rejected
P52630-3	signal transducer and activator of transcription 2 [OS=Homo sapiens]	1.18925	0.772	1.45785	1.0283	0.586	1.33041	0.0345778	0.0474511	Rejected	Rejected
P17535	Transcription factor jun-D [OS=Homo sapiens]	1.08597	0.626	1.54212	1.04323	0.586	1.37498	0.0449756	0.047486	Rejected	Rejected
P62910	60S ribosomal protein L32 [OS=Homo sapiens]	1.49437	0.895	1.67765	1.08394	0.585	1.57979	0.0228193	0.0475209	Rejected	Rejected
O60832-1	H/ACA ribonucleoprotein complex subunit 4 [OS=Homo sapiens]	1.26188	0.791	1.64965	1.04569	0.585	1.39437	0.0323447	0.0475559	Rejected	Rejected
O76024	Wolframin [OS=Homo sapiens]	5.82688	0.631	11.0683	6.08288	0.584	8.73874	0.044208	0.0475908	Rejected	Rejected
Q13131-2	Isoform 2 of 5'-AMP-activated protein kinase catalytic subunit alpha-1 [OS=Homo sapiens]	1.22396	0.87	1.31439	1.03202	0.583	1.28078	0.0254361	0.0476257	Rejected	Rejected
O75439	mitochondrial-processing peptidase subunit beta [OS=Homo sapiens]	1.29824	0.679	2.5611	6.41168	0.583	15.8979	0.0409979	0.0476606	Rejected	Rejected
Q96DV4	39S ribosomal protein L38, mitochondrial [OS=Homo sapiens]	1.24851	0.794	1.45944	1.04778	0.582	1.66954	0.0320307	0.0476955	Rejected	Rejected
Q15404-1	Ras suppressor protein 1 [OS=Homo sapiens]	1.02753	0.576	1.30586	1.06054	0.582	1.64085	0.0488835	0.0477304	Rejected	Rejected
Q9Y4B6	protein vprbp [OS=Homo sapiens]	1.01492	0.556	1.37235	1.0396	0.582	1.4646	0.0503838	0.0477654	Rejected	Rejected
Q6NVY1	3-hydroxyisobutyryl-CoA hydrolase, mitochondrial [OS=Homo sapiens]	0.709887	0.127	1.6434	1.02857	0.582	1.22497	0.0740754	0.0478003	Rejected	Rejected
P08579	U2 small nuclear ribonucleoprotein B'' [OS=Homo sapiens]	0.770278	0.062	1.28871	1.05086	0.582	1.37211	0.0774599	0.0478352	Rejected	Rejected
O60762	Dolichol-phosphate mannosyltransferase subunit 1 [OS=Homo sapiens]	1.14192	0.69	1.52865	1.06093	0.581	1.65017	0.040335	0.0478701	Rejected	Rejected
Q9HCS7	Pre-mRNA-splicing factor SYF1 [OS=Homo sapiens]	0.95671	0.413	1.46274	1.05342	0.581	1.36761	0.058374	0.047905	Rejected	Rejected
P43304	Glycerol-3-phosphate dehydrogenase, mitochondrial [OS=Homo sapiens]	0.690271	0.305	2.01019	1.3975	0.581	2.60075	0.0646197	0.0479399	Rejected	Rejected
O60784-2	Isoform 2 of Target of Myb protein 1 [OS=Homo sapiens]	0.803019	0.171	1.3932	1.04316	0.58	1.54428	0.0711793	0.0479749	Rejected	Rejected
Q8NCW5	NAD(P)H-hydrate epimerase [OS=Homo sapiens]	1.08238	0.582	2.64773	1.03104	0.579	3.95033	0.0482554	0.0480098	Rejected	Rejected
Q27J81	Inverted formin-2 [OS=Homo sapiens]	1.3157	0.96	1.28272	1.08777	0.578	1.68391	0.0153524	0.0480447	Rejected	Rejected
Q8NBX0	saccharopine dehydrogenase-like oxidoreductase [OS=Homo sapiens]	0.944295	0.358	1.23603	1.03803	0.577	1.30823	0.0618981	0.0480796	Rejected	Rejected
Q01970-1	1-phosphatidylinositol 4,5-bisphosphate phosphodiesterase beta-3 [OS=Homo sapiens]	1.04163	0.644	1.22773	1.1105	0.576	1.86079	0.0433008	0.0481145	Rejected	Rejected
Q15121-2	Isoform 2 of Astrocytic phosphoprotein PEA-15 [OS=Homo sapiens]	0.955872	0.364	1.26993	1.03835	0.576	1.30834	0.0614445	0.0481494	Rejected	Rejected
P48444	Coatomer subunit delta [OS=Homo sapiens]	1.67656	0.915	1.83661	1.0854	0.574	2.13722	0.0209002	0.0481844	Rejected	Rejected
P63167	Dynein light chain 1, cytoplasmic [OS=Homo sapiens]	1.14395	0.727	1.32079	1.21327	0.574	1.65006	0.0374738	0.0482193	Rejected	Rejected
Q8N766-1	ER membrane protein complex subunit 1 [OS=Homo sapiens]	0.920146	0.399	1.77432	1.03251	0.574	1.52962	0.059351	0.0482542	Rejected	Rejected
P00813	adenosine deaminase [OS=Homo sapiens]	1.2245	0.87	1.32588	1.0652	0.573	1.4956	0.025471	0.0482891	Rejected	Rejected
Q96G03	Phosphoglucomutase-2 [OS=Homo sapiens]	1.63188	0.788	2.07867	2.11388	0.573	3.04954	0.0326588	0.048324	Rejected	Rejected
Q96DI7-2	Isoform 2 of U5 small nuclear ribonucleoprotein 40 kDa protein [OS=Homo sapiens]	1.1149	0.708	1.42147	1.03756	0.573	1.40783	0.0390091	0.0483589	Rejected	Rejected
Q00653-1	Nuclear factor NF-kappa-B p100 subunit [OS=Homo sapiens]	0.634008	0.038	1.48014	1.06349	0.573	1.56006	0.0789951	0.0483939	Rejected	Rejected
Q04760-1	lactoylglutathione lyase [OS=Homo sapiens]	0.288051	0.114	3.98128	1.0401	0.572	1.43107	0.0745987	0.0484288	Rejected	Rejected
Q9BUQ8	Probable ATP-dependent RNA helicase DDX23 [OS=Homo sapiens]	1.40779	0.92	1.4506	1.04804	0.571	1.56125	0.0203419	0.0484637	Rejected	Rejected
Q86X51	Uncharacterized protein CXorf67 [OS=Homo sapiens]	0.898568	0.447	2.58524	1.04264	0.571	1.41419	0.056769	0.0484986	Rejected	Rejected
Q8WUM0	Nuclear pore complex protein Nup133 [OS=Homo sapiens]	2.95137	0.956	2.89318	1.21191	0.569	5.54384	0.0158758	0.0485335	Rejected	Rejected
P42226	Signal transducer and activator of transcription 6 [OS=Homo sapiens]	1.28317	0.803	1.61863	1.04189	0.569	1.49924	0.0314027	0.0485684	Rejected	Rejected
P20340-1	Ras-related protein Rab-6A [OS=Homo sapiens]	0.76943	0.059	1.29322	1.04898	0.569	1.52658	0.0776343	0.0486034	Rejected	Rejected
Q5BKZ1	DBIRD complex subunit ZNF326 [OS=Homo sapiens]	0.746246	0.138	1.56566	1.03099	0.568	1.30002	0.073238	0.0486383	Rejected	Rejected
O15213	WD repeat-containing protein 46 [OS=Homo sapiens]	1.68177	0.932	1.76807	1.10261	0.567	1.70053	0.0189114	0.0486732	Rejected	Rejected
Q9Y2Z4	Tyrosine--tRNA ligase, mitochondrial [OS=Homo sapiens]	1.42177	0.73	2.30057	1.78564	0.567	2.90509	0.0372645	0.0487081	Rejected	Rejected
P63096-1	Guanine nucleotide-binding protein G(i) subunit alpha-1 [OS=Homo sapiens]	0.939489	0.377	1.38808	1.04029	0.567	1.48374	0.0607118	0.048743	Rejected	Rejected
Q14257-2	Isoform 2 of Reticulocalbin-2 [OS=Homo sapiens]	0.751284	0.058	1.3203	1.01413	0.567	3.05264	0.0777041	0.0487779	Rejected	Rejected
O75694	nuclear pore complex protein nup155 [OS=Homo sapiens]	1.44459	0.728	3.01501	1.09955	0.566	2.6233	0.037404	0.0488128	Rejected	Rejected
Q01130	serine/arginine-rich splicing factor 2 [OS=Homo sapiens]	0.20252	0.161	5.63593	1.06615	0.566	1.66362	0.0717376	0.0488478	Rejected	Rejected
Q8N668	COMM domain-containing protein 1 [OS=Homo sapiens]	0.833701	0.36	2.24774	2.13325	0.565	3.06129	0.0616888	0.0488827	Rejected	Rejected
Q13526	peptidyl-prolyl cis-trans isomerase NIMA-interacting 1 [OS=Homo sapiens]	1.39113	0.882	1.57588	1.03809	0.564	1.4047	0.0243196	0.0489176	Rejected	Rejected
P60981-1	Destrin [OS=Homo sapiens]	1.00257	0.517	1.30783	1.02409	0.564	1.39926	0.0526518	0.0489525	Rejected	Rejected
Q92769	Histone deacetylase 2 [OS=Homo sapiens]	2.01333	0.831	3.12364	1.09385	0.563	2.61776	0.0290649	0.0489874	Rejected	Rejected
P18206	Vinculin [OS=Homo sapiens]	1.23023	0.702	2.01724	1.06286	0.563	1.88089	0.0394976	0.0490223	Rejected	Rejected
P34897-1	Serine hydroxymethyltransferase, mitochondrial [OS=Homo sapiens]	0.452767	0.035	2.03674	1.15596	0.563	4.01197	0.0791696	0.0490573	Rejected	Rejected
P19525	interferon-induced, double-stranded RNA-activated protein kinase [OS=Homo sapiens]	7.3915	0.973	6.86358	2.44703	0.562	7.07684	0.0134334	0.0490922	Rejected	Rejected
Q8NB90-1	Spermatogenesis-associated protein 5 [OS=Homo sapiens]	1.04681	0.557	1.3645	1.02067	0.562	1.26068	0.050314	0.0491271	Rejected	Rejected
Q9UQE7	Structural maintenance of chromosomes protein 3 [OS=Homo sapiens]	0.543292	0.163	2.36928	2.58606	0.562	9.83886	0.0716329	0.049162	Rejected	Rejected
Q9P287-2	Isoform 2 of BRCA2 and CDKN1A-interacting protein [OS=Homo sapiens]	1.05789	0.629	1.34874	1.02944	0.561	1.41122	0.0444522	0.0491969	Rejected	Rejected
Q9HCC0-1	Methylcrotonoyl-CoA carboxylase beta chain, mitochondrial [OS=Homo sapiens]	1.4504	0.992	1.31794	1.02452	0.559	1.49614	0.00830426	0.0492318	Enriched	Rejected
Q6PL18-1	ATPase family AAA domain-containing protein 2 [OS=Homo sapiens]	1.18964	0.763	1.52706	1.05698	0.559	1.38802	0.035171	0.0492668	Rejected	Rejected
Q00325-2	Isoform B of Phosphate carrier protein, mitochondrial [OS=Homo sapiens]	1.50614	0.707	3.96335	1.19072	0.559	4.60786	0.0391486	0.0493017	Rejected	Rejected
O94874-1	E3 UFM1-protein ligase 1 [OS=Homo sapiens]	2.11027	0.615	3.11641	1.3194	0.559	1.72021	0.0458479	0.0493366	Rejected	Rejected
Q02543	60S ribosomal protein L18a [OS=Homo sapiens]	0.800352	0.02	1.2026	1.03898	0.559	1.40572	0.0801117	0.0493715	Rejected	Rejected
Q14166	Tubulin--tyrosine ligase-like protein 12 [OS=Homo sapiens]	5.98021	0.927	6.45619	1.48557	0.558	4.18469	0.0193999	0.0494064	Rejected	Rejected
Q99536	Synaptic vesicle membrane protein VAT-1 homolog [OS=Homo sapiens]	1.05047	0.567	2.08121	1.05628	0.558	1.58325	0.0495813	0.0494413	Rejected	Rejected
Q16531	DNA damage-binding protein 1 [OS=Homo sapiens]	1.2101	0.627	3.61258	1.07142	0.557	4.07315	0.0446615	0.0494763	Rejected	Rejected
O75208-1	Ubiquinone biosynthesis protein COQ9, mitochondrial [OS=Homo sapiens]	0.981071	0.466	1.32619	1.02337	0.557	1.3936	0.0556874	0.0495112	Rejected	Rejected
Q9NTK5-1	obg-like ATPase 1 [OS=Homo sapiens]	3.17373	0.948	3.19082	1.1037	0.556	2.57047	0.0169574	0.0495461	Rejected	Rejected
Q9NV70-1	exocyst complex component 1 [OS=Homo sapiens]	1.20454	0.769	1.48481	1.03411	0.556	1.65986	0.0348918	0.049581	Rejected	Rejected
Q9Y371-2	Isoform 2 of Endophilin-B1 [OS=Homo sapiens]	0.854669	0.255	1.39111	1.06044	0.556	1.68937	0.0673761	0.0496159	Rejected	Rejected
P62318	small nuclear ribonucleoprotein sm d3 [OS=Homo sapiens]	0.668414	0.261	1.93637	1.02365	0.555	1.31109	0.0669923	0.0496508	Rejected	Rejected
Q96CW5	Gamma-tubulin complex component 3 [OS=Homo sapiens]	0.749584	0.188	1.68683	1.37123	0.555	1.81113	0.0702024	0.0496858	Rejected	Rejected
Q9NY33	dipeptidyl peptidase 3 [OS=Homo sapiens]	1.41289	0.861	1.6837	1.32464	0.553	1.81361	0.0263433	0.0497207	Rejected	Rejected
P13798	Acylamino-acid-releasing enzyme [OS=Homo sapiens]	0.446497	0.224	2.9438	1.09189	0.553	1.86339	0.0689812	0.0497556	Rejected	Rejected
P30566	adenylosuccinate lyase [OS=Homo sapiens]	1.21746	0.78	1.51509	1.02216	0.551	1.44831	0.0335659	0.0497905	Rejected	Rejected
P40429	60S ribosomal protein L13a [OS=Homo sapiens]	0.66659	0.208	2.1674	1.04374	0.55	1.72831	0.0696092	0.0498254	Rejected	Rejected
Q8TCG1	Protein CIP2A [OS=Homo sapiens]	0.714792	0.068	1.42533	1.02665	0.549	1.29934	0.0770063	0.0498603	Rejected	Rejected
Q8IYI6	Exocyst complex component 8 [OS=Homo sapiens]	1.22735	0.869	1.3235	1.04192	0.548	1.6026	0.0256106	0.0498953	Rejected	Rejected
Q96TA1	Niban-like protein 1 [OS=Homo sapiens]	1.21506	0.678	2.43409	1.17111	0.548	2.06935	0.0411724	0.0499302	Rejected	Rejected
Q53FA7-1	Quinone oxidoreductase PIG3 [OS=Homo sapiens]	0.899935	0.255	1.28279	1.03604	0.548	1.39332	0.0674459	0.0499651	Rejected	Rejected
Q9NPQ8-3	Isoform 3 of Synembryn-A [OS=Homo sapiens]	0.620682	0.041	1.60298	1.72599	0.548	2.19023	0.0786462	0.05	Rejected	Rejected
Q9HDC9	Adipocyte plasma membrane-associated protein [OS=Homo sapiens]	2.52438	0.75	7.03077	2.18663	0.547	4.763	0.0360084	0.0500349	Rejected	Rejected
P78406	mRNA export factor [OS=Homo sapiens]	1.57196	0.859	1.91643	1.15243	0.546	2.17412	0.0265527	0.0500698	Rejected	Rejected
Q13617-2	Isoform 2 of Cullin-2 [OS=Homo sapiens]	1.05422	0.589	1.38182	1.01109	0.546	1.31065	0.0478018	0.0501047	Rejected	Rejected
Q9ULR0-1	Isoform 2 of Pre-mRNA-splicing factor ISY1 homolog [OS=Homo sapiens]	0.553381	0.014	1.50503	1.02033	0.546	1.44758	0.0804606	0.0501397	Rejected	Rejected
P62899	60S ribosomal protein L31 [OS=Homo sapiens]	1.44254	0.799	1.84493	1.09473	0.545	1.89781	0.0316469	0.0501746	Rejected	Rejected
Q9Y285	Phenylalanine--tRNA ligase alpha subunit [OS=Homo sapiens]	1.13031	0.726	1.44423	1.01484	0.545	1.35747	0.0375436	0.0502095	Rejected	Rejected
P30837	Aldehyde dehydrogenase X, mitochondrial [OS=Homo sapiens]	2.79437	0.851	4.74692	1.02436	0.543	1.31266	0.027425	0.0502444	Rejected	Rejected
Q13098-7	Isoform 2 of COP9 signalosome complex subunit 1 [OS=Homo sapiens]	1.10868	0.513	2.75521	1.07475	0.543	2.23729	0.0529309	0.0502793	Rejected	Rejected
Q9H583	HEAT repeat-containing protein 1 [OS=Homo sapiens]	0.827037	0.014	1.15332	1.03992	0.543	1.35658	0.0804257	0.0503142	Rejected	Rejected
P28676	Grancalcin [OS=Homo sapiens]	0.9933	0.487	1.33316	1.02056	0.542	1.26944	0.0545359	0.0503492	Rejected	Rejected
Q8WUM4-2	Isoform 2 of Programmed cell death 6-interacting protein [OS=Homo sapiens]	2.30763	0.862	3.06684	1.03524	0.541	2.48007	0.0260991	0.0503841	Rejected	Rejected
P56182	Ribosomal RNA processing protein 1 homolog A [OS=Homo sapiens]	0.797822	0.105	1.32732	1.00948	0.539	1.55715	0.0749826	0.050419	Rejected	Rejected
O43324-1	Eukaryotic translation elongation factor 1 epsilon-1 [OS=Homo sapiens]	0.730278	0.077	1.48743	1.01361	0.539	1.43691	0.0766225	0.0504539	Rejected	Rejected
P48729-1	Casein kinase I isoform alpha [OS=Homo sapiens]	0.813524	0.065	1.24436	1.02387	0.539	1.52346	0.0773203	0.0504888	Rejected	Rejected
O96005-1	Cleft lip and palate transmembrane protein 1 [OS=Homo sapiens]	1.14372	0.831	1.27713	1.01523	0.538	1.36989	0.0291347	0.0505237	Rejected	Rejected
Q9HCJ6	Synaptic vesicle membrane protein VAT-1 homolog-like [OS=Homo sapiens]	0.151672	0.146	11.6555	1.00327	0.538	12.954	0.0726797	0.0505587	Rejected	Rejected
P49411	elongation factor Tu, mitochondrial [OS=Homo sapiens]	1.09418	0.643	2.71241	1.13417	0.537	1.79728	0.0434054	0.0505936	Rejected	Rejected
Q9UBC2-2	Isoform 2 of Epidermal growth factor receptor substrate 15-like 1 [OS=Homo sapiens]	1.039	0.597	1.40171	1.00724	0.536	1.28764	0.0473133	0.0506285	Rejected	Rejected
P22676	Calretinin [OS=Homo sapiens]	0.702212	0.237	2.40291	1.52419	0.536	6.13308	0.0682484	0.0506634	Rejected	Rejected
Q14318-2	Isoform 2 of Peptidyl-prolyl cis-trans isomerase FKBP8 [OS=Homo sapiens]	1.5633	0.624	3.2215	1.81302	0.535	2.99634	0.0450454	0.0506983	Rejected	Rejected
P11717	Cation-independent mannose-6-phosphate receptor [OS=Homo sapiens]	1.1091	0.739	1.26998	1.11483	0.534	2.11059	0.036776	0.0507332	Rejected	Rejected
Q12841	Follistatin-related protein 1 [OS=Homo sapiens]	1.12036	0.665	1.59178	1.01891	0.534	1.41648	0.0419051	0.0507682	Rejected	Rejected
O00429	Dynamin-1-like protein [OS=Homo sapiens]	0.773567	0.118	1.39263	1.01869	0.534	1.30032	0.0744592	0.0508031	Rejected	Rejected
Q7L1Q6-3	Isoform 3 of Basic leucine zipper and W2 domain-containing protein 1 [OS=Homo sapiens]	2.53195	0.687	3.05536	1.00771	0.533	1.21514	0.0404745	0.050838	Rejected	Rejected
Q96T23	remodeling and spacing factor 1 [OS=Homo sapiens]	1.73654	0.577	3.61001	1.30318	0.532	3.75251	0.0488137	0.0508729	Rejected	Rejected
P54577	Tyrosine--tRNA ligase, cytoplasmic [OS=Homo sapiens]	2.62391	0.827	3.97285	1.07639	0.53	3.04264	0.0297278	0.0509078	Rejected	Rejected
Q969T4	Ubiquitin-conjugating enzyme E2 E3 [OS=Homo sapiens]	1.45303	0.9	1.59521	1.02275	0.529	1.62781	0.0225052	0.0509427	Rejected	Rejected
P42765	3-ketoacyl-CoA thiolase, mitochondrial [OS=Homo sapiens]	1.76437	0.684	2.93683	1.55351	0.529	2.83233	0.040649	0.0509777	Rejected	Rejected
Q16630-2	Isoform 2 of Cleavage and polyadenylation specificity factor subunit 6 [OS=Homo sapiens]	1.24839	0.579	2.81455	1.43171	0.529	2.78006	0.0484648	0.0510126	Rejected	Rejected
Q4G0J3-3	Isoform 3 of La-related protein 7 [OS=Homo sapiens]	1.43584	0.665	1.94346	1.44678	0.528	2.07937	0.0418702	0.0510475	Rejected	Rejected
Q9HAV7	GrpE protein homolog 1, mitochondrial [OS=Homo sapiens]	1.00587	0.526	1.30286	1.0113	0.528	1.60323	0.0523029	0.0510824	Rejected	Rejected
Q07666	KH domain-containing, RNA-binding, signal transduction-associated protein 1 [OS=Homo sapiens]	0.532855	0.092	2.38811	1.01582	0.528	1.84465	0.0755408	0.0511173	Rejected	Rejected
Q58EX7	Puratrophin-1 [OS=Homo sapiens]	0.682256	0.058	1.47452	1.01287	0.528	1.42226	0.077739	0.0511522	Rejected	Rejected
Q49A26-1	Putative oxidoreductase GLYR1 [OS=Homo sapiens]	1.03271	0.523	1.37039	1.00168	0.527	1.30239	0.0524075	0.0511872	Rejected	Rejected
Q15427	Splicing factor 3b subunit 4 [OS=Homo sapiens]	1.76541	0.832	2.44454	1.03436	0.526	2.19957	0.0289951	0.0512221	Rejected	Rejected
P11233	Ras-related protein Ral-A [OS=Homo sapiens]	0.884507	0.288	1.34073	1.00616	0.526	1.34987	0.0654222	0.051257	Rejected	Rejected
P47985	cytochrome b-c1 complex subunit Rieske, mitochondrial [OS=Homo sapiens]	0.366478	0.155	3.16886	1.00562	0.526	1.38825	0.0721214	0.0512919	Rejected	Rejected
Q8N3E9	1-phosphatidylinositol 4,5-bisphosphate phosphodiesterase delta-3 [OS=Homo sapiens]	27.8824	0.935	28.3905	9.7001	0.525	23.2659	0.0184578	0.0513268	Rejected	Rejected
P52926-1	high mobility group protein HMGI-C [OS=Homo sapiens]	1.02487	0.544	1.25491	0.997408	0.525	1.4205	0.0513259	0.0513617	Rejected	Rejected
Q13951-2	Isoform 2 of Core-binding factor subunit beta [OS=Homo sapiens]	0.80845	0.145	1.39195	1.04474	0.525	1.64378	0.0727844	0.0513966	Rejected	Rejected
P62140	Serine/threonine-protein phosphatase PP1-beta catalytic subunit [OS=Homo sapiens]	2.0777	0.852	5.13296	0.729914	0.524	3.07065	0.0272854	0.0514316	Rejected	Rejected
P29558-1	RNA-binding motif, single-stranded-interacting protein 1 [OS=Homo sapiens]	0.850058	0.268	1.45574	1.03651	0.524	1.22814	0.0665038	0.0514665	Rejected	Rejected
Q14684	Ribosomal RNA processing protein 1 homolog B [OS=Homo sapiens]	4.82261	0.957	4.76335	1.02364	0.523	1.80504	0.0157013	0.0515014	Rejected	Rejected
P09104	Gamma-enolase [OS=Homo sapiens]	1.59831	0.707	4.15192	1.43176	0.523	2.97687	0.0391137	0.0515363	Rejected	Rejected
O14929	histone acetyltransferase type B catalytic subunit [OS=Homo sapiens]	6.28259	0.961	5.05078	1.16307	0.52	3.81021	0.0152128	0.0515712	Rejected	Rejected
O14737	Programmed cell death protein 5 [OS=Homo sapiens]	1.00677	0.497	1.52082	0.999595	0.52	1.53292	0.0540126	0.0516061	Rejected	Rejected
P17655-1	Calpain-2 catalytic subunit [OS=Homo sapiens]	8.72896	1	7.76783	1.41124	0.519	3.67313	0.00136078	0.0516411	Enriched	Rejected
P08670	Vimentin [OS=Homo sapiens]	1.24441	0.718	1.57508	0.825771	0.519	2.79637	0.038067	0.051676	Rejected	Rejected
Q06210-1	glutamine--fructose-6-phosphate aminotransferase [isomerizing] 1 [OS=Homo sapiens]	0.88685	0.348	1.86127	1.03527	0.519	2.12609	0.0624215	0.0517109	Rejected	Rejected
P49815	Tuberin [OS=Homo sapiens]	0.599963	0.259	4.8949	20.5974	0.519	50.2663	0.0671668	0.0517458	Rejected	Rejected
Q92896-2	Isoform 2 of Golgi apparatus protein 1 [OS=Homo sapiens]	0.409401	0.031	2.29706	1.04438	0.519	1.84314	0.0793091	0.0517807	Rejected	Rejected
P35580-4	Isoform 4 of Myosin-10 [OS=Homo sapiens]	2.42493	0.861	2.84054	1.14684	0.518	4.36116	0.0262736	0.0518156	Rejected	Rejected
O75947-1	ATP synthase subunit d, mitochondrial [OS=Homo sapiens]	2.78322	0.828	6.19032	1.01779	0.518	2.76887	0.0296232	0.0518506	Rejected	Rejected
Q9P2E9-1	Ribosome-binding protein 1 [OS=Homo sapiens]	0.785564	0.387	3.30816	1.01182	0.518	3.41451	0.060014	0.0518855	Rejected	Rejected
P20073-1	Annexin A7 [OS=Homo sapiens]	0.710165	0.319	3.43101	1.15401	0.518	3.30234	0.0639218	0.0519204	Rejected	Rejected
O94992	Protein HEXIM1 [OS=Homo sapiens]	0.646028	0.174	1.90259	1.02826	0.518	2.0656	0.07097	0.0519553	Rejected	Rejected
Q15102	Platelet-activating factor acetylhydrolase IB subunit gamma [OS=Homo sapiens]	1.20705	0.914	1.23796	1.00416	0.517	1.31395	0.0211445	0.0519902	Rejected	Rejected
Q9NP72	Ras-related protein Rab-18 [OS=Homo sapiens]	1.43596	0.724	1.90809	1.00821	0.517	1.55974	0.0377879	0.0520251	Rejected	Rejected
Q16629	serine/arginine-rich splicing factor 7 [OS=Homo sapiens]	1.99284	0.56	2.72693	1.01779	0.517	1.47508	0.0501396	0.0520601	Rejected	Rejected
O95235	kinesin-like protein KIF20A [OS=Homo sapiens]	0.854745	0.282	1.60254	1.01116	0.517	1.24171	0.0657362	0.052095	Rejected	Rejected
P55084	Trifunctional enzyme subunit beta, mitochondrial [OS=Homo sapiens]	4.1833	0.817	7.58743	1.02457	0.516	3.36217	0.0303559	0.0521299	Rejected	Rejected
O00148	ATP-dependent RNA helicase DDX39A [OS=Homo sapiens]	1.06456	0.651	1.26523	1.00356	0.516	1.35336	0.0428472	0.0521648	Rejected	Rejected
Q9NYB0	Telomeric repeat-binding factor 2-interacting protein 1 [OS=Homo sapiens]	3.6464	0.973	3.52869	1.32232	0.515	3.76152	0.0133287	0.0521997	Rejected	Rejected
Q9UL46	proteasome activator complex subunit 2 [OS=Homo sapiens]	1.77781	0.874	2.20726	1.01816	0.515	2.06844	0.0249477	0.0522346	Rejected	Rejected
Q01844-5	Isoform 5 of RNA-binding protein EWS [OS=Homo sapiens]	1.09787	0.64	1.37725	2.07719	0.515	2.79316	0.0436148	0.0522696	Rejected	Rejected
P57737-3	Isoform 3 of Coronin-7 [OS=Homo sapiens]	1.30685	0.66	1.93123	1.01604	0.514	2.55875	0.042254	0.0523045	Rejected	Rejected
Q9ULX3	RNA-binding protein NOB1 [OS=Homo sapiens]	1.03889	0.626	1.21627	1.00654	0.514	1.30778	0.0448709	0.0523394	Rejected	Rejected
Q9NR56-1	Muscleblind-like protein 1 [OS=Homo sapiens]	0.921472	0.379	1.52322	0.999915	0.513	1.24091	0.0605722	0.0523743	Rejected	Rejected
P12277	Creatine kinase B-type [OS=Homo sapiens]	5.50372	0.573	49.2411	0.973785	0.512	9.7757	0.0491277	0.0524092	Rejected	Rejected
P04062	glucosylceramidase [OS=Homo sapiens]	0.865093	0.19	1.29951	1.00687	0.512	1.40059	0.0700628	0.0524441	Rejected	Rejected
P20810-5	Isoform 5 of Calpastatin [OS=Homo sapiens]	0.740371	0.087	1.42937	1.00691	0.512	1.47233	0.0760642	0.0524791	Rejected	Rejected
Q70UQ0-4	Isoform 4 of Inhibitor of nuclear factor kappa-B kinase-interacting protein [OS=Homo sapiens]	0.921493	0.45	3.74883	1.13562	0.509	2.50055	0.0566294	0.052514	Rejected	Rejected
Q99598	Translin-associated protein X [OS=Homo sapiens]	0.700867	0.232	2.84275	1.03	0.509	1.43541	0.0685625	0.0525489	Rejected	Rejected
Q00059	Transcription factor A, mitochondrial [OS=Homo sapiens]	0.928083	0.391	1.56219	1.00474	0.508	1.19119	0.0599093	0.0525838	Rejected	Rejected
Q5T6V5	UPF0553 protein C9orf64 [OS=Homo sapiens]	1.49899	0.596	8.66947	1.02894	0.507	5.05181	0.0473482	0.0526187	Rejected	Rejected
Q5JTV8-3	Isoform 3 of Torsin-1A-interacting protein 1 [OS=Homo sapiens]	0.980287	0.469	1.48163	1.02914	0.507	1.6946	0.0554431	0.0526536	Rejected	Rejected
Q96PU8	protein quaking [OS=Homo sapiens]	0.868485	0.307	1.53974	0.986355	0.507	1.51387	0.0644452	0.0526885	Rejected	Rejected
Q14258	E3 ubiquitin/ISG15 ligase TRIM25 [OS=Homo sapiens]	0.899685	0.305	1.26238	1.00731	0.507	1.51763	0.0645848	0.0527235	Rejected	Rejected
Q96IU4	Protein ABHD14B [OS=Homo sapiens]	2.58758	0.799	4.02444	1.00595	0.504	3.43385	0.031612	0.0527584	Rejected	Rejected
P24928	DNA-directed RNA polymerase II subunit RPB1 [OS=Homo sapiens]	1.07323	0.579	1.63357	0.999931	0.504	1.39442	0.0484997	0.0527933	Rejected	Rejected
P27708	CAD protein [OS=Homo sapiens]	0.847947	0.423	2.10062	0.958411	0.504	1.93881	0.0579204	0.0528282	Rejected	Rejected
P52815	39S ribosomal protein L12, mitochondrial [OS=Homo sapiens]	0.870367	0.352	1.74668	1.00846	0.504	1.62257	0.0622121	0.0528631	Rejected	Rejected
P47897	glutamine--tRNA ligase [OS=Homo sapiens]	77.6724	0.514	117.026	1.17555	0.503	3.5856	0.0528262	0.052898	Rejected	Rejected
P32320	cytidine deaminase [OS=Homo sapiens]	0.659318	0.486	5.43321	0.903195	0.503	2.59459	0.0546406	0.052933	Rejected	Rejected
Q9NVS9	Pyridoxine-5'-phosphate oxidase [OS=Homo sapiens]	0.967515	0.436	1.42791	0.991406	0.503	1.3435	0.0572924	0.0529679	Rejected	Rejected
P11021	78 kDa glucose-regulated protein [OS=Homo sapiens]	0.615634	0.084	1.73291	1.01079	0.503	1.48062	0.0762736	0.0530028	Rejected	Rejected
Q14192	Four and a half LIM domains protein 2 [OS=Homo sapiens]	4.31755	0.996	2.56613	1.01808	0.501	2.20491	0.00676902	0.0530377	Enriched	Rejected
Q08752	peptidyl-prolyl cis-trans isomerase D [OS=Homo sapiens]	1.1157	0.74	1.24716	0.995718	0.501	1.62938	0.0367411	0.0530726	Rejected	Rejected
Q9GZU8	Protein FAM192A [OS=Homo sapiens]	1.06733	0.644	1.34386	1.01039	0.501	1.45676	0.0433357	0.0531075	Rejected	Rejected
Q8NB66	Protein unc-13 homolog C [OS=Homo sapiens]	0.994492	0.477	1.26188	0.998457	0.501	1.60567	0.0550593	0.0531425	Rejected	Rejected
P53007	Tricarboxylate transport protein, mitochondrial [OS=Homo sapiens]	1.04337	0.588	1.48189	1.01044	0.5	1.47636	0.0480112	0.0531774	Rejected	Rejected
P35813-3	Isoform 3 of Protein phosphatase 1A [OS=Homo sapiens]	0.956892	0.421	1.3922	0.99885	0.5	1.3108	0.0580949	0.0532123	Rejected	Rejected
Q9P0J0-2	Isoform 2 of NADH dehydrogenase [ubiquinone] 1 alpha subcomplex subunit 13 [OS=Homo sapiens]	0.657812	0.273	2.70724	1.00661	0.5	2.28231	0.06612	0.0532472	Rejected	Rejected
Q96EK6	glucosamine 6-phosphate N-acetyltransferase [OS=Homo sapiens]	0.970268	0.41	1.33545	1.00618	0.499	1.41666	0.0585136	0.0532821	Rejected	Rejected
P78344-1	Eukaryotic translation initiation factor 4 gamma 2 [OS=Homo sapiens]	9.84863	0.985	7.76918	0.176004	0.498	22.9311	0.0105024	0.053317	Rejected	Rejected
P45973	chromobox protein homolog 5 [OS=Homo sapiens]	2.44767	0.723	3.87297	1.03282	0.498	2.59031	0.0378227	0.053352	Rejected	Rejected
Q9BXP5	serrate RNA effector molecule homolog [OS=Homo sapiens]	0.965579	0.439	1.52862	0.993311	0.497	1.29635	0.0570482	0.0533869	Rejected	Rejected
Q13642-4	Isoform 4 of Four and a half LIM domains protein 1 [OS=Homo sapiens]	0.656347	0.038	1.51518	1.00777	0.496	1.36584	0.0789253	0.0534218	Rejected	Rejected
Q9H1E3	Nuclear ubiquitous casein and cyclin-dependent kinase substrate 1 [OS=Homo sapiens]	1.574	0.993	1.42059	0.988474	0.495	1.51656	0.00799023	0.0534567	Enriched	Rejected
Q14444-1	Caprin-1 [OS=Homo sapiens]	1.55683	0.729	5.32048	0.958868	0.495	2.20757	0.0372994	0.0534916	Rejected	Rejected
Q9NRG0	Chromatin accessibility complex protein 1 [OS=Homo sapiens]	0.997978	0.488	1.2692	0.997575	0.495	1.39639	0.054501	0.0535265	Rejected	Rejected
Q9P000-1	COMM domain-containing protein 9 [OS=Homo sapiens]	1.76974	0.689	2.38746	0.995775	0.494	1.37379	0.0404396	0.0535615	Rejected	Rejected
P52943-2	Isoform 2 of Cysteine-rich protein 2 [OS=Homo sapiens]	0.916969	0.347	1.37031	1.00259	0.494	1.34202	0.0625611	0.0535964	Rejected	Rejected
P37108	Signal recognition particle 14 kDa protein [OS=Homo sapiens]	4.47409	0.957	4.39971	0.985983	0.493	2.06209	0.0157711	0.0536313	Rejected	Rejected
Q9UEE9-1	Craniofacial development protein 1 [OS=Homo sapiens]	0.791309	0.257	1.72153	0.996699	0.493	1.33291	0.0672366	0.0536662	Rejected	Rejected
O14773	Tripeptidyl-peptidase 1 [OS=Homo sapiens]	2.65732	0.893	2.86399	0.99927	0.492	1.5057	0.0233077	0.0537011	Rejected	Rejected
P06576	ATP synthase subunit beta, mitochondrial [OS=Homo sapiens]	1.32882	0.718	2.36122	0.995035	0.492	1.93757	0.0381019	0.053736	Rejected	Rejected
Q13601	KRR1 small subunit processome component homolog [OS=Homo sapiens]	0.827199	0.096	1.34573	0.989885	0.492	1.41481	0.0753664	0.0537709	Rejected	Rejected
Q5SY16	Polynucleotide 5'-hydroxyl-kinase NOL9 [OS=Homo sapiens]	1.64506	0.681	2.08433	0.997911	0.491	1.43898	0.0408932	0.0538059	Rejected	Rejected
P06400	Retinoblastoma-associated protein [OS=Homo sapiens]	1.03393	0.553	1.47821	0.984472	0.491	1.45812	0.0505932	0.0538408	Rejected	Rejected
P61254	60S ribosomal protein L26 [OS=Homo sapiens]	0.0835956	0.077	13.8743	0.38192	0.49	17.4892	0.0765178	0.0538757	Rejected	Rejected
P55327-3	Isoform 3 of Tumor protein D52 [OS=Homo sapiens]	1.81957	0.765	3.07527	0.905305	0.489	2.29769	0.0350663	0.0539106	Rejected	Rejected
O95292	Vesicle-associated membrane protein-associated protein B/C [OS=Homo sapiens]	1.19891	0.657	1.90305	0.76504	0.489	2.6793	0.0424634	0.0539455	Rejected	Rejected
Q9UBV2	Protein sel-1 homolog 1 [OS=Homo sapiens]	1.42199	0.802	1.93166	0.997227	0.488	1.34922	0.0314724	0.0539804	Rejected	Rejected
Q8IXI1	Mitochondrial Rho GTPase 2 [OS=Homo sapiens]	1.05937	0.63	1.36202	0.99552	0.488	1.61364	0.0443126	0.0540154	Rejected	Rejected
Q96MW1	Coiled-coil domain-containing protein 43 [OS=Homo sapiens]	0.903861	0.415	2.13198	1.12241	0.488	2.43248	0.0583043	0.0540503	Rejected	Rejected
Q14194-2	Isoform LCRMP-1 of Dihydropyrimidinase-related protein 1 [OS=Homo sapiens]	0.892448	0.347	1.48895	0.979478	0.488	1.47345	0.0625262	0.0540852	Rejected	Rejected
P30046	D-dopachrome decarboxylase [OS=Homo sapiens]	1.36724	0.911	1.41474	1.00033	0.487	1.76414	0.0213887	0.0541201	Rejected	Rejected
P13674-1	prolyl 4-hydroxylase subunit alpha-1 [OS=Homo sapiens]	0.306507	0.001	1.8795	0.956042	0.486	1.60873	0.0814724	0.054155	Rejected	Rejected
Q05193-1	Dynamin-1 [OS=Homo sapiens]	0.85338	0.424	2.25176	1.02499	0.485	1.3707	0.0578507	0.0541899	Rejected	Rejected
O75569-1	Interferon-inducible double-stranded RNA-dependent protein kinase activator A [OS=Homo sapiens]	1.15932	0.879	1.24268	0.997587	0.484	1.27121	0.0245639	0.0542249	Rejected	Rejected
O14497	AT-rich interactive domain-containing protein 1A [OS=Homo sapiens]	1.19653	0.772	1.54959	0.999534	0.484	1.25174	0.0345429	0.0542598	Rejected	Rejected
Q8WTT2	Nucleolar complex protein 3 homolog [OS=Homo sapiens]	3.14616	0.932	3.26444	1.00026	0.483	1.62078	0.0188765	0.0542947	Rejected	Rejected
P51148-2	Isoform 2 of Ras-related protein Rab-5C [OS=Homo sapiens]	1.0711	0.619	1.40753	0.999864	0.483	1.27759	0.0454641	0.0543296	Rejected	Rejected
Q9H6S3	epidermal growth factor receptor kinase substrate 8-like protein 2 [OS=Homo sapiens]	1.01041	0.516	1.34082	0.988447	0.482	1.34378	0.0527216	0.0543645	Rejected	Rejected
Q15642	Cdc42-interacting protein 4 [OS=Homo sapiens]	3.69239	0.769	5.37999	0.903072	0.481	4.04162	0.0348569	0.0543994	Rejected	Rejected
O43818	U3 small nucleolar RNA-interacting protein 2 [OS=Homo sapiens]	1.99958	0.895	2.43572	0.939242	0.48	3.25759	0.0229239	0.0544344	Rejected	Rejected
P28072	Proteasome subunit beta type-6 [OS=Homo sapiens]	1.1412	0.629	1.8268	0.969579	0.48	2.58492	0.0444871	0.0544693	Rejected	Rejected
Q7Z406-2	Isoform 2 of Myosin-14 [OS=Homo sapiens]	1.27998	0.558	2.70627	0.995639	0.48	2.11812	0.0501745	0.0545042	Rejected	Rejected
Q8NBQ5	Estradiol 17-beta-dehydrogenase 11 [OS=Homo sapiens]	0.95861	0.398	1.41516	0.953726	0.479	1.733	0.0594906	0.0545391	Rejected	Rejected
Q6A162	Keratin, type I cytoskeletal 40 [OS=Homo sapiens]	0.850331	0.128	1.27679	0.982615	0.479	1.37199	0.0739009	0.054574	Rejected	Rejected
Q2M2I8-1	AP2-associated protein kinase 1 [OS=Homo sapiens]	0.672469	0.341	2.87496	0.64767	0.478	262.729	0.06291	0.0546089	Rejected	Rejected
P53582	Methionine aminopeptidase 1 [OS=Homo sapiens]	0.680615	0.127	1.69841	0.957283	0.478	2.05052	0.0739707	0.0546439	Rejected	Rejected
P17900	Ganglioside GM2 activator [OS=Homo sapiens]	1.40493	0.862	1.67998	0.747734	0.477	3.06695	0.0262038	0.0546788	Rejected	Rejected
P42566-1	epidermal growth factor receptor substrate 15 [OS=Homo sapiens]	0.388755	0.381	3.37649	0.984612	0.477	1.38631	0.0603629	0.0547137	Rejected	Rejected
Q07020	60S ribosomal protein L18 [OS=Homo sapiens]	0.909879	0.159	1.17835	0.996685	0.477	1.40729	0.0718074	0.0547486	Rejected	Rejected
P01860	Ig gamma-3 chain C region [OS=Homo sapiens]	1.02361	0.528	1.59177	0.708327	0.476	2.60042	0.0521982	0.0547835	Rejected	Rejected
O43847-2	Isoform 2 of Nardilysin [OS=Homo sapiens]	1.4092	0.851	1.64284	0.975769	0.475	1.44426	0.0274599	0.0548184	Rejected	Rejected
P63208	s-phase kinase-associated protein 1 [OS=Homo sapiens]	1.01341	0.549	1.30137	0.971296	0.474	1.61976	0.0510468	0.0548534	Rejected	Rejected
Q9Y5L0-1	Isoform 1 of Transportin-3 [OS=Homo sapiens]	0.878662	0.303	1.41501	0.992477	0.474	1.35983	0.0647244	0.0548883	Rejected	Rejected
O75340	programmed cell death protein 6 [OS=Homo sapiens]	0.576889	0.147	1.96113	1.35933	0.474	2.40259	0.072575	0.0549232	Rejected	Rejected
O75477	erlin-1 [OS=Homo sapiens]	1.13293	0.671	1.54297	0.992878	0.473	1.64381	0.041626	0.0549581	Rejected	Rejected
P09622	Dihydrolipoyl dehydrogenase, mitochondrial [OS=Homo sapiens]	1.19005	0.564	4.12267	0.971956	0.473	2.55451	0.0498255	0.054993	Rejected	Rejected
Q6DKI1	60S ribosomal protein L7-like 1 [OS=Homo sapiens]	0.770527	0.135	1.42785	0.992635	0.473	1.30825	0.0734822	0.0550279	Rejected	Rejected
Q13835	Plakophilin-1 [OS=Homo sapiens]	0.345337	0.064	3.12603	0.846435	0.473	2.47144	0.0773901	0.0550628	Rejected	Rejected
Q9H496	Torsin-1A-interacting protein 2, isoform IFRG15 [OS=Homo sapiens]	1.18486	0.904	1.22682	0.951259	0.472	1.77014	0.0220516	0.0550978	Rejected	Rejected
Q96P70	Importin-9 [OS=Homo sapiens]	1.32741	0.725	1.86526	0.976474	0.472	1.55775	0.0376134	0.0551327	Rejected	Rejected
Q96B97-1	SH3 domain-containing kinase-binding protein 1 [OS=Homo sapiens]	0.796465	0.139	1.3832	0.968043	0.472	1.52126	0.0731333	0.0551676	Rejected	Rejected
Q10471	Polypeptide N-acetylgalactosaminyltransferase 2 [OS=Homo sapiens]	0.380765	0.074	2.84151	0.913655	0.472	6.21273	0.0768318	0.0552025	Rejected	Rejected
Q969G3	SWI/SNF-related matrix-associated actin-dependent regulator of chromatin subfamily E member 1 [OS=Homo sapiens]	1.09021	0.653	1.48901	0.979911	0.471	1.35105	0.0427425	0.0552374	Rejected	Rejected
P29353-6	Isoform 6 of SHC-transforming protein 1 [OS=Homo sapiens]	1.9318	0.831	2.45578	0.987834	0.469	1.74464	0.0292045	0.0552723	Rejected	Rejected
Q9NRN7	L-aminoadipate-semialdehyde dehydrogenase-phosphopantetheinyl transferase [OS=Homo sapiens]	1.81613	0.996	1.51072	0.973661	0.468	1.33985	0.00690858	0.0553073	Enriched	Rejected
Q5T1M5	FK506-binding protein 15 [OS=Homo sapiens]	1.25694	0.888	1.36064	0.973674	0.468	1.46106	0.0237962	0.0553422	Rejected	Rejected
Q14676	Mediator of DNA damage checkpoint protein 1 [OS=Homo sapiens]	1.45246	0.802	2.08844	0.969822	0.468	1.4919	0.0314375	0.0553771	Rejected	Rejected
Q8IZ83	Aldehyde dehydrogenase family 16 member A1 [OS=Homo sapiens]	1.17124	0.718	1.55677	0.972513	0.468	1.67627	0.0381717	0.055412	Rejected	Rejected
P53990-5	Isoform 5 of IST1 homolog [OS=Homo sapiens]	146.413	0.987	4.55014	0.086665	0.466	22.3824	0.00994417	0.0554469	Rejected	Rejected
Q96FJ2	Dynein light chain 2, cytoplasmic [OS=Homo sapiens]	13.8657	0.952	13.7613	0.143934	0.466	9.09634	0.0162945	0.0554818	Rejected	Rejected
Q96PZ0	pseudouridylate synthase 7 homolog [OS=Homo sapiens]	1.46059	0.685	4.84921	0.941435	0.466	4.60709	0.0406141	0.0555168	Rejected	Rejected
P07947	tyrosine-protein kinase Yes [OS=Homo sapiens]	1.08285	0.745	1.21632	0.942729	0.465	1.42609	0.0364271	0.0555517	Rejected	Rejected
O43175	D-3-phosphoglycerate dehydrogenase [OS=Homo sapiens]	1.23688	0.577	9.71167	0.966173	0.465	3.58771	0.0487788	0.0555866	Rejected	Rejected
P09110-1	3-ketoacyl-CoA thiolase, peroxisomal [OS=Homo sapiens]	0.797002	0.104	1.30936	0.981353	0.465	1.32394	0.0750174	0.0556215	Rejected	Rejected
P01130	Low-density lipoprotein receptor [OS=Homo sapiens]	1.31007	0.968	1.2665	1.00128	0.464	1.24536	0.0141661	0.0556564	Rejected	Rejected
P28370-1	Probable global transcription activator SNF2L1 [OS=Homo sapiens]	1.39897	0.807	1.65524	0.991393	0.464	1.25609	0.0310537	0.0556913	Rejected	Rejected
O75494-1	Serine/arginine-rich splicing factor 10 [OS=Homo sapiens]	0.85093	0.317	1.81121	0.962279	0.464	1.68104	0.0640265	0.0557263	Rejected	Rejected
Q6P1A2	Lysophospholipid acyltransferase 5 [OS=Homo sapiens]	1.34495	0.859	1.624	0.97815	0.463	1.50366	0.0265876	0.0557612	Rejected	Rejected
Q96C90	Protein phosphatase 1 regulatory subunit 14B [OS=Homo sapiens]	1.31583	0.67	1.89055	0.99359	0.463	1.37271	0.0416609	0.0557961	Rejected	Rejected
Q66K74	Microtubule-associated protein 1S [OS=Homo sapiens]	1.23833	0.686	1.65783	0.990346	0.462	1.18976	0.0405094	0.055831	Rejected	Rejected
Q8IWX8	Calcium homeostasis endoplasmic reticulum protein [OS=Homo sapiens]	0.793262	0.075	1.30189	0.993985	0.462	1.11655	0.0767969	0.0558659	Rejected	Rejected
P48739-3	Isoform 3 of Phosphatidylinositol transfer protein beta isoform [OS=Homo sapiens]	0.950618	0.514	2.81428	0.504621	0.461	5.92098	0.0528611	0.0559008	Rejected	Rejected
Q8NHH9	Atlastin-2 [OS=Homo sapiens]	0.867165	0.217	1.29888	0.966475	0.461	1.60889	0.0692603	0.0559358	Rejected	Rejected
Q9Y448	Small kinetochore-associated protein [OS=Homo sapiens]	1.10326	0.663	1.42333	0.975655	0.46	1.45961	0.0420098	0.0559707	Rejected	Rejected
P26639-1	Threonine--tRNA ligase, cytoplasmic [OS=Homo sapiens]	0.404679	0.026	2.21338	0.906987	0.46	4.05249	0.079693	0.0560056	Rejected	Rejected
Q92538	Golgi-specific brefeldin A-resistance guanine nucleotide exchange factor 1 [OS=Homo sapiens]	1.23933	0.874	1.34817	0.97523	0.458	1.37339	0.0250174	0.0560405	Rejected	Rejected
Q9H4A4	aminopeptidase B [OS=Homo sapiens]	0.96803	0.48	2.68052	0.584694	0.458	6.68648	0.05485	0.0560754	Rejected	Rejected
P08708	40S ribosomal protein S17 [OS=Homo sapiens]	2.95741	0.916	4.17805	0.938815	0.457	2.74662	0.0207606	0.0561103	Rejected	Rejected
Q9H9B4	Sideroflexin-1 [OS=Homo sapiens]	1.20511	0.698	1.87809	0.884621	0.457	2.53994	0.0398465	0.0561453	Rejected	Rejected
Q9P2B4	CTTNBP2 N-terminal-like protein [OS=Homo sapiens]	0.896326	0.315	1.39573	0.975974	0.456	1.34702	0.0641661	0.0561802	Rejected	Rejected
Q9ULA0	Aspartyl aminopeptidase [OS=Homo sapiens]	1.83007	0.83	2.28887	0.966657	0.454	1.55399	0.029344	0.0562151	Rejected	Rejected
Q7L2E3-2	Isoform 2 of Putative ATP-dependent RNA helicase DHX30 [OS=Homo sapiens]	0.946681	0.452	1.78023	0.964722	0.453	1.42245	0.0565597	0.05625	Rejected	Rejected
Q9NWH9-1	SAFB-like transcription modulator [OS=Homo sapiens]	3.89829	0.931	4.17358	0.569994	0.452	2.66309	0.0190161	0.0562849	Rejected	Rejected
O95336	6-phosphogluconolactonase [OS=Homo sapiens]	0.913728	0.385	1.49455	0.868641	0.451	2.10101	0.0601186	0.0563198	Rejected	Rejected
Q9BTC0	Death-inducer obliterator 1 [OS=Homo sapiens]	1.38216	0.976	1.32952	0.967233	0.45	1.5752	0.0127355	0.0563547	Rejected	Rejected
P52306-5	Isoform 5 of Rap1 GTPase-GDP dissociation stimulator 1 [OS=Homo sapiens]	5.70181	0.905	5.95542	0.975063	0.45	1.22135	0.0218772	0.0563897	Rejected	Rejected
O14617-5	Isoform 5 of AP-3 complex subunit delta-1 [OS=Homo sapiens]	1.20123	0.778	1.48107	0.97877	0.45	1.42414	0.0340195	0.0564246	Rejected	Rejected
P55735-3	Isoform 3 of Protein SEC13 homolog [OS=Homo sapiens]	0.980006	0.463	1.43699	0.657254	0.45	2.92146	0.0559316	0.0564595	Rejected	Rejected
O95347-1	structural maintenance of chromosomes protein 2 [OS=Homo sapiens]	1.33468	0.694	2.60585	0.948248	0.449	2.16971	0.039986	0.0564944	Rejected	Rejected
Q00765	Receptor expression-enhancing protein 5 [OS=Homo sapiens]	1.07077	0.621	1.44302	0.970385	0.449	1.46699	0.0452547	0.0565293	Rejected	Rejected
Q96D46	60S ribosomal export protein NMD3 [OS=Homo sapiens]	0.791996	0.216	1.54811	0.952421	0.448	1.47827	0.0693301	0.0565642	Rejected	Rejected
Q5VT79	annexin A8-like protein 1 [OS=Homo sapiens]	1.31026	0.912	1.40136	0.982028	0.447	1.29798	0.021284	0.0565992	Rejected	Rejected
Q6UN15-1	Pre-mRNA 3'-end-processing factor FIP1 [OS=Homo sapiens]	0.94996	0.331	1.22295	0.946157	0.447	1.52444	0.0634682	0.0566341	Rejected	Rejected
O60488-1	Long-chain-fatty-acid--CoA ligase 4 [OS=Homo sapiens]	0.43991	0.304	5.27798	0.464518	0.447	4.1757	0.0646546	0.056669	Rejected	Rejected
Q9UKX7	Nuclear pore complex protein Nup50 [OS=Homo sapiens]	1.2414	0.891	1.33723	0.978355	0.446	1.51275	0.023552	0.0567039	Rejected	Rejected
Q9UNX4	WD repeat-containing protein 3 [OS=Homo sapiens]	2.19108	1	1.51498	0.94568	0.445	1.49353	0.00397767	0.0567388	Enriched	Rejected
Q9Y6D9	mitotic spindle assembly checkpoint protein MAD1 [OS=Homo sapiens]	0.870293	0.26	1.46079	0.969761	0.445	1.35713	0.067097	0.0567737	Rejected	Rejected
Q8TAQ2	SWI/SNF complex subunit SMARCC2 [OS=Homo sapiens]	0.598537	0.076	1.7718	0.966939	0.444	1.54565	0.0766923	0.0568087	Rejected	Rejected
O14818-1	Proteasome subunit alpha type-7 [OS=Homo sapiens]	1.53611	0.753	3.26117	0.878586	0.443	2.96079	0.0358339	0.0568436	Rejected	Rejected
P84243	histone H3.3 [OS=Homo sapiens]	1.05553	0.597	2.83189	0.923678	0.441	1.80167	0.0472784	0.0568785	Rejected	Rejected
Q6PI48	Aspartate--tRNA ligase, mitochondrial [OS=Homo sapiens]	0.748466	0.087	1.39597	0.417528	0.439	3.1318	0.0760991	0.0569134	Rejected	Rejected
Q14141-1	Septin-6 [OS=Homo sapiens]	0.650384	0.03	1.48808	0.972269	0.439	1.27881	0.0794487	0.0569483	Rejected	Rejected
P12955	xaa-Pro dipeptidase [OS=Homo sapiens]	0.457716	0.227	3.76005	0.70985	0.438	2.13143	0.0688765	0.0569832	Rejected	Rejected
Q01581	hydroxymethylglutaryl-CoA synthase, cytoplasmic [OS=Homo sapiens]	2.92459	0.893	4.29317	0.940722	0.436	2.23147	0.0232729	0.0570182	Rejected	Rejected
Q9NRX1	RNA-binding protein pno1 [OS=Homo sapiens]	1.23109	0.85	1.37079	0.964554	0.436	1.29987	0.0275645	0.0570531	Rejected	Rejected
Q13630	GDP-L-fucose synthase [OS=Homo sapiens]	0.606203	0.125	1.80061	0.967634	0.436	1.37291	0.0742149	0.057088	Rejected	Rejected
P07858	Cathepsin B [OS=Homo sapiens]	0.375569	0.016	2.19421	0.236151	0.436	5.79118	0.0803908	0.0571229	Rejected	Rejected
P20645	Cation-dependent mannose-6-phosphate receptor [OS=Homo sapiens]	1.28718	0.816	1.51312	0.880979	0.433	1.45319	0.0304257	0.0571578	Rejected	Rejected
P36957	Dihydrolipoyllysine-residue succinyltransferase component of 2-oxoglutarate dehydrogenase complex, mitochondrial [OS=Homo sapiens]	1.08368	0.556	2.25538	0.216445	0.433	7.46702	0.0503489	0.0571927	Rejected	Rejected
Q9UBQ5	Eukaryotic translation initiation factor 3 subunit K [OS=Homo sapiens]	0.523232	0.029	1.88949	0.978914	0.433	1.47923	0.0795534	0.0572277	Rejected	Rejected
Q9NQW6	actin-binding protein anillin [OS=Homo sapiens]	1.16201	0.725	1.51017	0.931829	0.43	1.52963	0.0376832	0.0572626	Rejected	Rejected
Q12996-1	Cleavage stimulation factor subunit 3 [OS=Homo sapiens]	1.29527	0.708	1.49771	0.917773	0.429	1.66777	0.039044	0.0572975	Rejected	Rejected
Q9UMS4	Pre-mRNA-processing factor 19 [OS=Homo sapiens]	3.88685	0.965	3.81148	0.976434	0.428	1.24936	0.0146895	0.0573324	Rejected	Rejected
Q9UPN9-1	E3 ubiquitin-protein ligase TRIM33 [OS=Homo sapiens]	1.12917	0.785	1.25758	0.955379	0.427	1.38263	0.0330426	0.0573673	Rejected	Rejected
Q8ND04-2	Isoform 2 of Protein SMG8 [OS=Homo sapiens]	0.326717	0.374	3.44913	0.955698	0.427	1.3626	0.0609211	0.0574022	Rejected	Rejected
Q9HB07	UPF0160 protein MYG1, mitochondrial [OS=Homo sapiens]	1.1565	0.788	1.35641	0.98316	0.426	1.2168	0.0327285	0.0574372	Rejected	Rejected
O43660-1	Pleiotropic regulator 1 [OS=Homo sapiens]	0.827066	0.257	1.56807	0.976861	0.426	1.28064	0.0672017	0.0574721	Rejected	Rejected
Q9H0U3	Magnesium transporter protein 1 [OS=Homo sapiens]	0.953358	0.464	1.53735	0.935497	0.425	1.63544	0.0558269	0.057507	Rejected	Rejected
Q86U44	N6-adenosine-methyltransferase 70 kDa subunit [OS=Homo sapiens]	0.911516	0.18	1.15981	0.949876	0.425	1.31119	0.070656	0.0575419	Rejected	Rejected
Q9Y5Y2	Cytosolic Fe-S cluster assembly factor NUBP2 [OS=Homo sapiens]	0.936739	0.403	1.52958	0.966835	0.423	1.31939	0.0589323	0.0575768	Rejected	Rejected
P50895	Basal cell adhesion molecule [OS=Homo sapiens]	2.09593	0.892	2.42207	0.900543	0.421	2.26235	0.0234822	0.0576117	Rejected	Rejected
Q13418	Integrin-linked protein kinase [OS=Homo sapiens]	1.101	0.709	1.41251	0.963437	0.421	1.38098	0.0388695	0.0576466	Rejected	Rejected
Q9H0C8	Integrin-linked kinase-associated serine/threonine phosphatase 2C [OS=Homo sapiens]	0.990849	0.512	1.39888	0.789252	0.421	1.87237	0.0529658	0.0576816	Rejected	Rejected
O43617-1	Trafficking protein particle complex subunit 3 [OS=Homo sapiens]	1.73605	0.999	1.41083	0.959119	0.42	1.40859	0.00505932	0.0577165	Enriched	Rejected
Q9NR45	sialic acid synthase [OS=Homo sapiens]	1.08845	0.637	1.43773	0.969351	0.42	1.32194	0.0437893	0.0577514	Rejected	Rejected
Q15020	Squamous cell carcinoma antigen recognized by T-cells 3 [OS=Homo sapiens]	0.897936	0.311	1.4136	0.960342	0.42	1.44859	0.0643057	0.0577863	Rejected	Rejected
Q9NVD7	alpha-parvin [OS=Homo sapiens]	1.01795	0.517	1.49802	0.974225	0.419	1.31399	0.0526867	0.0578212	Rejected	Rejected
P61160-1	Actin-related protein 2 [OS=Homo sapiens]	0.999917	0.498	1.66642	0.969115	0.419	1.35761	0.0538032	0.0578561	Rejected	Rejected
Q9BSJ2-4	Isoform 3 of Gamma-tubulin complex component 2 [OS=Homo sapiens]	0.805926	0.164	1.45096	0.95985	0.419	1.48037	0.0715632	0.0578911	Rejected	Rejected
P56377	AP-1 complex subunit sigma-2 [OS=Homo sapiens]	1.26659	0.807	1.55302	0.935379	0.418	1.45464	0.0311235	0.057926	Rejected	Rejected
P40938	replication factor C subunit 3 [OS=Homo sapiens]	1.01654	0.565	1.2857	0.959913	0.417	1.23863	0.049686	0.0579609	Rejected	Rejected
P31943	Heterogeneous nuclear ribonucleoprotein H [OS=Homo sapiens]	1.55622	0.74	3.15849	0.869365	0.415	3.35988	0.0367062	0.0579958	Rejected	Rejected
P07814	Bifunctional glutamate/proline--tRNA ligase [OS=Homo sapiens]	1.26493	0.823	1.50551	0.896567	0.414	2.18921	0.0299721	0.0580307	Rejected	Rejected
Q07157	Tight junction protein ZO-1 [OS=Homo sapiens]	1.48738	0.716	1.73284	0.941428	0.414	1.51873	0.0384508	0.0580656	Rejected	Rejected
Q9BYD6	39S ribosomal protein L1, mitochondrial [OS=Homo sapiens]	3.68751	0.786	4.0277	0.759158	0.413	1.82426	0.0328681	0.0581006	Rejected	Rejected
Q96QR8	Transcriptional activator protein Pur-beta [OS=Homo sapiens]	1.17498	0.775	1.37856	0.948464	0.413	1.42214	0.0342289	0.0581355	Rejected	Rejected
O43396	Thioredoxin-like protein 1 [OS=Homo sapiens]	1.15757	0.753	1.41866	0.957312	0.413	1.37418	0.0358688	0.0581704	Rejected	Rejected
Q9Y617-1	phosphoserine aminotransferase [OS=Homo sapiens]	0.962354	0.401	1.40698	0.923185	0.413	1.77524	0.0591417	0.0582053	Rejected	Rejected
Q14165	Malectin [OS=Homo sapiens]	0.36444	0.059	2.78277	0.947365	0.413	1.69533	0.0775994	0.0582402	Rejected	Rejected
Q53H96	Pyrroline-5-carboxylate reductase 3 [OS=Homo sapiens]	1.05646	0.587	1.38213	0.96228	0.411	1.25573	0.0480461	0.0582751	Rejected	Rejected
Q14011	Cold-inducible RNA-binding protein [OS=Homo sapiens]	1.14616	0.705	1.59109	0.891354	0.41	1.34425	0.0392882	0.0583101	Rejected	Rejected
O60716-1	Catenin delta-1 [OS=Homo sapiens]	0.83612	0.185	1.34077	0.934051	0.41	1.54152	0.0704117	0.058345	Rejected	Rejected
Q06124	tyrosine-protein phosphatase non-receptor type 11 [OS=Homo sapiens]	0.964526	0.439	1.29962	0.588936	0.409	2.63072	0.0571179	0.0583799	Rejected	Rejected
P18085	ADP-ribosylation factor 4 [OS=Homo sapiens]	1.28207	0.828	1.52654	0.964339	0.408	1.33088	0.0295883	0.0584148	Rejected	Rejected
O00479	High mobility group nucleosome-binding domain-containing protein 4 [OS=Homo sapiens]	1.00932	0.551	1.25638	0.953631	0.408	1.32837	0.0507676	0.0584497	Rejected	Rejected
Q7L9L4-2	Isoform 2 of MOB kinase activator 1B [OS=Homo sapiens]	0.986997	0.496	1.70887	0.967102	0.408	1.27813	0.0541172	0.0584846	Rejected	Rejected
P22033	Methylmalonyl-CoA mutase, mitochondrial [OS=Homo sapiens]	1.1435	0.703	1.50614	0.96379	0.407	1.3613	0.0394627	0.0585196	Rejected	Rejected
P18858	DNA ligase 1 [OS=Homo sapiens]	0.782468	0.053	1.2723	0.950507	0.407	1.52617	0.0780181	0.0585545	Rejected	Rejected
O75436-1	Vacuolar protein sorting-associated protein 26A [OS=Homo sapiens]	0.607072	0.187	2.5828	0.899297	0.406	2.38791	0.070307	0.0585894	Rejected	Rejected
Q9NZT1	Calmodulin-like protein 5 [OS=Homo sapiens]	1.35165	0.57	2.22404	0.874157	0.405	2.39131	0.0493371	0.0586243	Rejected	Rejected
P61604	10 kDa heat shock protein, mitochondrial [OS=Homo sapiens]	0.19976	0.158	5.4812	0.769525	0.405	2.8926	0.0718772	0.0586592	Rejected	Rejected
Q9H3S7	Tyrosine-protein phosphatase non-receptor type 23 [OS=Homo sapiens]	0.951398	0.404	1.42909	0.936499	0.403	1.33153	0.0588974	0.0586941	Rejected	Rejected
Q96BN8	Ubiquitin thioesterase otulin [OS=Homo sapiens]	1.71403	0.846	2.59962	0.703218	0.402	5.28764	0.0278437	0.0587291	Rejected	Rejected
Q969V3	Nicalin [OS=Homo sapiens]	0.84012	0.193	1.39365	0.925921	0.402	1.56745	0.069993	0.058764	Rejected	Rejected
P54687-5	Isoform 5 of Branched-chain-amino-acid aminotransferase, cytosolic [OS=Homo sapiens]	1.80004	0.744	3.23624	0.695161	0.399	2.02473	0.0364969	0.0587989	Rejected	Rejected
P10155-1	60 kDa SS-A/Ro ribonucleoprotein [OS=Homo sapiens]	0.962364	0.426	1.44434	0.927495	0.398	1.5683	0.0577111	0.0588338	Rejected	Rejected
Q9HD33-1	39S ribosomal protein L47, mitochondrial [OS=Homo sapiens]	1.10412	0.638	1.56199	0.93117	0.397	1.54607	0.0437544	0.0588687	Rejected	Rejected
Q92552-2	Isoform 2 of 28S ribosomal protein S27, mitochondrial [OS=Homo sapiens]	0.971706	0.409	1.33119	0.92839	0.396	1.46959	0.0585834	0.0589036	Rejected	Rejected
Q9BYT8	Neurolysin, mitochondrial [OS=Homo sapiens]	1.23245	0.831	1.40423	0.931237	0.395	1.97621	0.0290998	0.0589385	Rejected	Rejected
O43143	Pre-mRNA-splicing factor ATP-dependent RNA helicase DHX15 [OS=Homo sapiens]	2.9302	0.881	3.058	0.892414	0.394	1.84582	0.0243894	0.0589735	Rejected	Rejected
Q13126-1	S-methyl-5'-thioadenosine phosphorylase [OS=Homo sapiens]	1.5797	0.897	1.65743	0.938779	0.393	1.40401	0.0226448	0.0590084	Rejected	Rejected
P11310-2	Isoform 2 of Medium-chain specific acyl-CoA dehydrogenase, mitochondrial [OS=Homo sapiens]	1.1123	0.731	1.3658	0.916792	0.393	1.54439	0.0371598	0.0590433	Rejected	Rejected
P53041	Serine/threonine-protein phosphatase 5 [OS=Homo sapiens]	0.466617	0.169	3.48645	0.806798	0.393	4.31704	0.0713189	0.0590782	Rejected	Rejected
P50579	methionine aminopeptidase 2 [OS=Homo sapiens]	0.802386	0.185	1.4816	0.967136	0.392	1.307	0.0704815	0.0591131	Rejected	Rejected
O75348	V-type proton ATPase subunit G 1 [OS=Homo sapiens]	3.70326	0.988	3.03022	0.861726	0.39	2.81651	0.00963015	0.059148	Rejected	Rejected
Q8WUF5	RelA-associated inhibitor [OS=Homo sapiens]	4.05918	0.985	3.04479	0.743417	0.388	2.97999	0.0106071	0.059183	Rejected	Rejected
P54105	Methylosome subunit pICln [OS=Homo sapiens]	0.922992	0.405	1.54697	0.955885	0.388	1.28176	0.0587927	0.0592179	Rejected	Rejected
O00764-1	Pyridoxal kinase [OS=Homo sapiens]	1.04572	0.603	1.29095	0.833878	0.387	2.27874	0.0466504	0.0592528	Rejected	Rejected
Q8TDN6	Ribosome biogenesis protein BRX1 homolog [OS=Homo sapiens]	0.879253	0.409	23.9028	0.225789	0.386	5.85638	0.0585485	0.0592877	Rejected	Rejected
O43156	TELO2-interacting protein 1 homolog [OS=Homo sapiens]	0.77653	0.092	1.34391	0.928883	0.386	1.46562	0.0755757	0.0593226	Rejected	Rejected
Q9NUL3	Double-stranded RNA-binding protein Staufen homolog 2 [OS=Homo sapiens]	1.14153	0.777	1.35878	0.892888	0.385	1.89874	0.0341242	0.0593575	Rejected	Rejected
P20042	Eukaryotic translation initiation factor 2 subunit 2 [OS=Homo sapiens]	1.26097	0.582	2.5494	0.770129	0.385	2.37484	0.0482205	0.0593925	Rejected	Rejected
O95433	activator of 90 kDa heat shock protein ATPase homolog 1 [OS=Homo sapiens]	0.483584	0.058	2.16876	0.88253	0.385	1.89822	0.0776692	0.0594274	Rejected	Rejected
P07099	epoxide hydrolase 1 [OS=Homo sapiens]	0.99712	0.504	2.62555	0.778531	0.384	2.59863	0.0534892	0.0594623	Rejected	Rejected
Q9NYK5-2	Isoform 2 of 39S ribosomal protein L39, mitochondrial [OS=Homo sapiens]	0.990082	0.474	1.19967	0.923406	0.384	1.47155	0.0551989	0.0594972	Rejected	Rejected
P14927-2	Isoform 2 of Cytochrome b-c1 complex subunit 7 [OS=Homo sapiens]	0.918843	0.3	1.24177	0.793544	0.382	1.88655	0.0647941	0.0595321	Rejected	Rejected
Q8NBJ7-1	Sulfatase-modifying factor 2 [OS=Homo sapiens]	1.80688	0.84	2.24289	0.878654	0.38	1.64283	0.0284368	0.059567	Rejected	Rejected
P62070-4	Isoform 4 of Ras-related protein R-Ras2 [OS=Homo sapiens]	1.13615	0.843	1.26299	0.0632537	0.379	19.1373	0.0281926	0.059602	Rejected	Rejected
P22531	Small proline-rich protein 2E [OS=Homo sapiens]	0.944251	0.402	1.45817	0.919703	0.377	1.56568	0.0590021	0.0596369	Rejected	Rejected
P10644	cAMP-dependent protein kinase type I-alpha regulatory subunit [OS=Homo sapiens]	0.750655	0.163	1.50235	0.920937	0.377	1.46845	0.0716678	0.0596718	Rejected	Rejected
Q14789-2	Isoform 2 of Golgin subfamily B member 1 [OS=Homo sapiens]	0.939107	0.39	1.48224	0.944417	0.376	1.28926	0.0599442	0.0597067	Rejected	Rejected
Q14151	scaffold attachment factor B2 [OS=Homo sapiens]	1.14565	0.717	1.40748	0.951103	0.374	1.30725	0.0383112	0.0597416	Rejected	Rejected
O43707	Alpha-actinin-4 [OS=Homo sapiens]	2.51831	0.999	1.81127	0.895172	0.373	1.80544	0.00439637	0.0597765	Enriched	Rejected
Q9BTV4	Transmembrane protein 43 [OS=Homo sapiens]	1.21476	0.485	1.74836	0.95042	0.373	1.32683	0.0547104	0.0598115	Rejected	Rejected
P19387	DNA-directed RNA polymerase II subunit RPB3 [OS=Homo sapiens]	5.1269	0.735	8.03578	0.928849	0.372	1.37888	0.0368458	0.0598464	Rejected	Rejected
P17252	Protein kinase C alpha type [OS=Homo sapiens]	0.845424	0.245	1.52634	0.888556	0.372	1.5667	0.0678995	0.0598813	Rejected	Rejected
Q8N3V7-1	synaptopodin [OS=Homo sapiens]	0.522249	0.23	2.25979	0.947205	0.372	1.33017	0.0686671	0.0599162	Rejected	Rejected
Q6DD88	Atlastin-3 [OS=Homo sapiens]	1.38423	0.719	2.6249	0.895052	0.371	1.65597	0.0379972	0.0599511	Rejected	Rejected
Q9NRY5	Protein FAM114A2 [OS=Homo sapiens]	1.01938	0.561	1.34036	0.916008	0.371	1.6017	0.0500349	0.059986	Rejected	Rejected
Q00688	peptidyl-prolyl cis-trans isomerase FKBP3 [OS=Homo sapiens]	0.988472	0.488	2.83217	0.926173	0.371	1.68495	0.0544662	0.0600209	Rejected	Rejected
Q9NRR5-1	Ubiquilin-4 [OS=Homo sapiens]	0.725529	0.151	1.63663	0.974903	0.371	1.23758	0.0723657	0.0600559	Rejected	Rejected
O00203-1	AP-3 complex subunit beta-1 [OS=Homo sapiens]	1.6643	0.915	1.84934	0.94815	0.37	1.27212	0.0210398	0.0600908	Rejected	Rejected
Q9BUH6	Protein PAXX [OS=Homo sapiens]	1.56004	0.853	1.98631	0.876699	0.37	1.75728	0.0272505	0.0601257	Rejected	Rejected
Q04446	1,4-alpha-glucan-branching enzyme [OS=Homo sapiens]	1.72679	0.974	1.6738	0.911771	0.369	1.65047	0.0130844	0.0601606	Rejected	Rejected
O94826	Mitochondrial import receptor subunit TOM70 [OS=Homo sapiens]	2.3691	0.77	5.02479	0.853696	0.369	2.67256	0.0346476	0.0601955	Rejected	Rejected
P00492	Hypoxanthine-guanine phosphoribosyltransferase [OS=Homo sapiens]	0.865101	0.177	1.30476	0.9265	0.369	1.37692	0.0707955	0.0602304	Rejected	Rejected
P61158	actin-related protein 3 [OS=Homo sapiens]	5.88379	0.962	5.58596	0.350589	0.368	7.28305	0.0150384	0.0602654	Rejected	Rejected
P26640	Valine--tRNA ligase [OS=Homo sapiens]	1.20069	0.6	2.12672	0.857418	0.368	2.29898	0.0469993	0.0603003	Rejected	Rejected
Q14697-1	Neutral alpha-glucosidase AB [OS=Homo sapiens]	1.49615	1	1.29986	0.899727	0.367	1.62572	0.000837404	0.0603352	Enriched	Rejected
Q9C0B1-1	alpha-ketoglutarate-dependent dioxygenase FTO [OS=Homo sapiens]	0.793403	0.267	1.79792	0.854136	0.367	1.43439	0.0665387	0.0603701	Rejected	Rejected
P02545	Prelamin-A/C [OS=Homo sapiens]	0.8305	0.238	1.41986	0.932812	0.366	1.50703	0.068074	0.060405	Rejected	Rejected
Q02539	Histone H1.1 [OS=Homo sapiens]	0.616251	0.023	1.55253	0.936523	0.366	1.40407	0.0799721	0.0604399	Rejected	Rejected
P38646	Stress-70 protein, mitochondrial [OS=Homo sapiens]	0.921673	0.428	2.15408	0.864438	0.365	2.10833	0.0575715	0.0604749	Rejected	Rejected
P41208	centrin-2 [OS=Homo sapiens]	0.537171	0.138	2.03035	0.880266	0.365	1.63491	0.0732031	0.0605098	Rejected	Rejected
P30041	Peroxiredoxin-6 [OS=Homo sapiens]	0.569011	0.016	1.63525	0.782991	0.365	2.78864	0.0803559	0.0605447	Rejected	Rejected
P21980	Protein-glutamine gamma-glutamyltransferase 2 [OS=Homo sapiens]	1.61495	0.984	1.46113	0.884335	0.364	1.77816	0.0108165	0.0605796	Rejected	Rejected
O95782	AP-2 complex subunit alpha-1 [OS=Homo sapiens]	1.76471	0.732	2.47849	0.121504	0.364	13.0957	0.0370551	0.0606145	Rejected	Rejected
O43681	ATPase ASNA1 [OS=Homo sapiens]	0.897993	0.316	1.45612	0.773243	0.364	3.99575	0.0640963	0.0606494	Rejected	Rejected
Q8NBJ5	Procollagen galactosyltransferase 1 [OS=Homo sapiens]	0.814068	0.165	1.39373	0.901853	0.364	1.75475	0.0714934	0.0606844	Rejected	Rejected
Q13057-2	Isoform 2 of Bifunctional coenzyme A synthase [OS=Homo sapiens]	0.764855	0.128	1.39858	0.914201	0.364	1.48	0.0739358	0.0607193	Rejected	Rejected
Q9H7E9-2	Isoform 2 of UPF0488 protein C8orf33 [OS=Homo sapiens]	0.943813	0.363	1.30468	0.932552	0.363	1.37783	0.0615492	0.0607542	Rejected	Rejected
Q9H4A3-7	Isoform 6 of Serine/threonine-protein kinase WNK1 [OS=Homo sapiens]	8.88963	0.877	9.97501	0.910913	0.362	1.48915	0.0248779	0.0607891	Rejected	Rejected
P09132-1	Signal recognition particle 19 kDa protein [OS=Homo sapiens]	0.976999	0.422	1.24776	0.882954	0.362	1.50062	0.0579902	0.060824	Rejected	Rejected
Q8N4V1-2	Isoform 2 of Membrane magnesium transporter 1 [OS=Homo sapiens]	1.28523	0.893	1.39043	0.866336	0.361	1.88764	0.0233775	0.0608589	Rejected	Rejected
P54619-3	Isoform 3 of 5'-AMP-activated protein kinase subunit gamma-1 [OS=Homo sapiens]	1.07755	0.675	1.32147	0.90886	0.361	1.49302	0.0414166	0.0608939	Rejected	Rejected
O15042	U2 snRNP-associated SURP motif-containing protein [OS=Homo sapiens]	1.0035	0.528	1.39306	0.91712	0.358	1.4779	0.0522331	0.0609288	Rejected	Rejected
Q96S44	TP53-regulating kinase [OS=Homo sapiens]	0.968234	0.421	1.29208	0.907515	0.358	1.39899	0.0581298	0.0609637	Rejected	Rejected
Q9Y2W1	Thyroid hormone receptor-associated protein 3 [OS=Homo sapiens]	0.826154	0.34	1.98746	0.843529	0.358	2.04318	0.0629449	0.0609986	Rejected	Rejected
Q16698	2,4-dienoyl-CoA reductase, mitochondrial [OS=Homo sapiens]	0.774807	0.299	2.05967	0.834295	0.358	2.09224	0.0648639	0.0610335	Rejected	Rejected
Q99541	perilipin-2 [OS=Homo sapiens]	0.74159	0.181	1.78747	0.942107	0.358	1.2769	0.0705862	0.0610684	Rejected	Rejected
P62314	Small nuclear ribonucleoprotein Sm D1 [OS=Homo sapiens]	0.934437	0.343	1.2455	0.915735	0.357	1.57055	0.0627704	0.0611034	Rejected	Rejected
Q9HAV4	exportin-5 [OS=Homo sapiens]	0.893113	0.173	1.22456	0.8536	0.357	1.50644	0.0710747	0.0611383	Rejected	Rejected
Q9NS69	Mitochondrial import receptor subunit TOM22 homolog [OS=Homo sapiens]	0.973487	0.494	1.45871	0.901413	0.356	1.50127	0.0542568	0.0611732	Rejected	Rejected
Q9GZT3-1	SRA stem-loop-interacting RNA-binding protein, mitochondrial [OS=Homo sapiens]	1.1964	0.751	1.55187	0.96876	0.354	1.19206	0.0359735	0.0612081	Rejected	Rejected
P05204	Non-histone chromosomal protein HMG-17 [OS=Homo sapiens]	1.22187	0.776	1.49319	0.856578	0.353	1.57047	0.0341591	0.061243	Rejected	Rejected
Q8TCD5	5'(3')-deoxyribonucleotidase, cytosolic type [OS=Homo sapiens]	3.42058	0.69	3.97171	0.929424	0.352	1.35224	0.0403001	0.0612779	Rejected	Rejected
Q96GC9	Vacuole membrane protein 1 [OS=Homo sapiens]	0.920024	0.359	1.24589	0.858125	0.35	1.70676	0.0617934	0.0613128	Rejected	Rejected
Q5RKV6	Exosome complex component MTR3 [OS=Homo sapiens]	0.856209	0.274	1.45337	0.892872	0.349	1.74746	0.0660851	0.0613478	Rejected	Rejected
O60610-1	Protein diaphanous homolog 1 [OS=Homo sapiens]	0.482982	0.065	2.21116	0.845166	0.349	2.75094	0.0771807	0.0613827	Rejected	Rejected
Q96JJ7-1	Protein disulfide-isomerase TMX3 [OS=Homo sapiens]	1.04513	0.585	1.31725	0.932702	0.348	1.34351	0.0481158	0.0614176	Rejected	Rejected
Q9Y3U8	60S ribosomal protein L36 [OS=Homo sapiens]	0.76231	0.312	2.07169	0.904589	0.346	1.44412	0.0642708	0.0614525	Rejected	Rejected
O94905-1	Erlin-2 [OS=Homo sapiens]	1.04572	0.591	1.45097	0.922097	0.345	1.36892	0.047732	0.0614874	Rejected	Rejected
P36639	7,8-dihydro-8-oxoguanine triphosphatase [OS=Homo sapiens]	0.978252	0.451	1.27419	0.949448	0.344	1.20277	0.0565946	0.0615223	Rejected	Rejected
Q9P0V9-2	Isoform 2 of Septin-10 [OS=Homo sapiens]	1.24021	0.988	1.17809	0.959937	0.343	1.18439	0.00973482	0.0615573	Rejected	Rejected
Q13228-4	Isoform 4 of Selenium-binding protein 1 [OS=Homo sapiens]	1.16877	0.878	1.23519	0.896027	0.343	1.54011	0.0247034	0.0615922	Rejected	Rejected
Q9H0W8	protein SMG9 [OS=Homo sapiens]	1.17466	0.602	1.67507	0.93608	0.341	1.46615	0.0468946	0.0616271	Rejected	Rejected
P11177	Pyruvate dehydrogenase E1 component subunit beta, mitochondrial [OS=Homo sapiens]	0.984874	0.5	1.84626	0.838458	0.341	2.63619	0.0535939	0.061662	Rejected	Rejected
P61011-1	signal recognition particle 54 kDa protein [OS=Homo sapiens]	1.26775	0.872	1.41625	0.667263	0.34	2.1292	0.0251919	0.0616969	Rejected	Rejected
Q96KP4	cytosolic non-specific dipeptidase [OS=Homo sapiens]	1.18052	0.594	4.80493	0.589873	0.339	10.3803	0.0475227	0.0617318	Rejected	Rejected
Q5T653	39S ribosomal protein L2, mitochondrial [OS=Homo sapiens]	1.37279	0.962	1.34692	0.894124	0.338	1.53319	0.0151779	0.0617668	Rejected	Rejected
Q9P035	Very-long-chain (3R)-3-hydroxyacyl-CoA dehydratase 3 [OS=Homo sapiens]	1.55024	0.762	1.7389	0.953265	0.338	1.21346	0.0353105	0.0618017	Rejected	Rejected
Q9UBX3-2	Isoform 2 of Mitochondrial dicarboxylate carrier [OS=Homo sapiens]	1.10447	0.646	1.45372	0.895071	0.338	1.56208	0.0431263	0.0618366	Rejected	Rejected
Q9Y3T9	Nucleolar complex protein 2 homolog [OS=Homo sapiens]	0.971811	0.426	1.34919	0.906688	0.338	1.36954	0.0576762	0.0618715	Rejected	Rejected
Q9Y508-1	E3 ubiquitin-protein ligase RNF114 [OS=Homo sapiens]	1.0613	0.698	1.19621	0.921897	0.337	1.3399	0.0398814	0.0619064	Rejected	Rejected
Q14790-9	Isoform 9 of Caspase-8 [OS=Homo sapiens]	0.387813	0.093	2.73805	0.808151	0.337	2.35427	0.075471	0.0619413	Rejected	Rejected
Q9NZT2-1	opioid growth factor receptor [OS=Homo sapiens]	1.29386	0.942	1.30267	0.925811	0.336	1.3719	0.0176902	0.0619763	Rejected	Rejected
Q2TAY7	WD40 repeat-containing protein SMU1 [OS=Homo sapiens]	0.734899	0.134	1.52523	0.90583	0.336	1.38211	0.073552	0.0620112	Rejected	Rejected
P26885	Peptidyl-prolyl cis-trans isomerase FKBP2 [OS=Homo sapiens]	1.11441	0.66	1.52874	0.917238	0.335	1.42156	0.0422889	0.0620461	Rejected	Rejected
P06756	Integrin alpha-V [OS=Homo sapiens]	0.534969	0.139	2.06979	0.886483	0.335	1.52777	0.0730984	0.062081	Rejected	Rejected
Q13618	Cullin-3 [OS=Homo sapiens]	0.755659	0.136	1.52648	0.947224	0.335	1.1971	0.0733775	0.0621159	Rejected	Rejected
Q05639	Elongation factor 1-alpha 2 [OS=Homo sapiens]	0.657438	0.199	2.81913	0.395168	0.334	5.32462	0.0697488	0.0621508	Rejected	Rejected
Q96RS6	NudC domain-containing protein 1 [OS=Homo sapiens]	3.87839	0.787	4.10749	0.901746	0.333	1.41642	0.0327634	0.0621858	Rejected	Rejected
Q92542-1	Nicastrin [OS=Homo sapiens]	0.694428	0.039	1.41695	0.930781	0.331	1.2943	0.0788904	0.0622207	Rejected	Rejected
Q9Y6G9	Cytoplasmic dynein 1 light intermediate chain 1 [OS=Homo sapiens]	0.801826	0.105	1.27686	0.918345	0.33	1.45004	0.0749477	0.0622556	Rejected	Rejected
Q07812-2	Isoform Beta of Apoptosis regulator BAX [OS=Homo sapiens]	2.58982	0.942	2.62193	0.749902	0.329	2.33422	0.0177251	0.0622905	Rejected	Rejected
P17174	Aspartate aminotransferase, cytoplasmic [OS=Homo sapiens]	1.14787	0.693	1.59355	0.770145	0.328	2.30532	0.0400907	0.0623254	Rejected	Rejected
P35080-2	Isoform IIb of Profilin-2 [OS=Homo sapiens]	0.468254	0.082	2.21615	0.677559	0.328	1.94123	0.0763433	0.0623603	Rejected	Rejected
Q00796	Sorbitol dehydrogenase [OS=Homo sapiens]	1.27836	0.973	1.23947	0.839136	0.326	1.81219	0.0133985	0.0623953	Rejected	Rejected
Q9UHX1-2	Isoform 2 of Poly(U)-binding-splicing factor PUF60 [OS=Homo sapiens]	2.00315	0.668	4.10726	0.568237	0.326	5.5111	0.0417655	0.0624302	Rejected	Rejected
P16152	Carbonyl reductase [NADPH] 1 [OS=Homo sapiens]	1.17206	0.594	4.1627	0.665094	0.326	4.05521	0.0475576	0.0624651	Rejected	Rejected
P45954	Short/branched chain specific acyl-CoA dehydrogenase, mitochondrial [OS=Homo sapiens]	0.871728	0.133	1.25233	0.899875	0.325	1.39211	0.0736218	0.0625	Rejected	Rejected
O60313-2	Isoform 2 of Dynamin-like 120 kDa protein, mitochondrial [OS=Homo sapiens]	1.15304	0.78	1.30698	0.927012	0.323	1.31947	0.0336357	0.0625349	Rejected	Rejected
Q96AG4	Leucine-rich repeat-containing protein 59 [OS=Homo sapiens]	0.558067	0.349	2.39993	0.916891	0.323	1.35093	0.0623517	0.0625698	Rejected	Rejected
P11766	alcohol dehydrogenase class-3 [OS=Homo sapiens]	1.32114	0.883	1.44404	0.905383	0.322	1.41405	0.0242847	0.0626047	Rejected	Rejected
A5YKK6	CCR4-NOT transcription complex subunit 1 [OS=Homo sapiens]	0.875372	0.38	1.62578	0.921025	0.322	1.31747	0.0604676	0.0626397	Rejected	Rejected
Q6YN16	Hydroxysteroid dehydrogenase-like protein 2 [OS=Homo sapiens]	1.08469	0.604	1.65844	0.882077	0.321	1.65983	0.0466155	0.0626746	Rejected	Rejected
P11279	Lysosome-associated membrane glycoprotein 1 [OS=Homo sapiens]	0.785042	0.267	1.70078	0.737174	0.32	2.09383	0.0665736	0.0627095	Rejected	Rejected
Q9NVJ2	ADP-ribosylation factor-like protein 8B [OS=Homo sapiens]	1.21781	0.787	1.43719	0.916339	0.319	1.30497	0.0327983	0.0627444	Rejected	Rejected
Q9BYN0	sulfiredoxin-1 [OS=Homo sapiens]	0.87585	0.254	1.337	0.915838	0.317	1.32009	0.0675157	0.0627793	Rejected	Rejected
P19784	casein kinase II subunit alpha' [OS=Homo sapiens]	0.698381	0.101	1.63932	0.888796	0.317	1.4081	0.0751221	0.0628142	Rejected	Rejected
O00571	ATP-dependent RNA helicase DDX3X [OS=Homo sapiens]	6.61348	0.94	6.95756	0.77701	0.316	2.55229	0.0179344	0.0628492	Rejected	Rejected
Q15717-2	Isoform 2 of ELAV-like protein 1 [OS=Homo sapiens]	1.60606	0.674	3.73172	0.385091	0.316	5.07418	0.0414864	0.0628841	Rejected	Rejected
Q9Y3E0	vesicle transport protein GOT1B [OS=Homo sapiens]	0.895494	0.322	1.40364	0.893326	0.316	1.45134	0.0637125	0.062919	Rejected	Rejected
Q8WUY1	Protein THEM6 [OS=Homo sapiens]	1.03959	0.556	1.34511	0.883751	0.315	1.5757	0.0504187	0.0629539	Rejected	Rejected
Q86X76-3	Isoform 4 of Nitrilase homolog 1 [OS=Homo sapiens]	0.900042	0.266	1.25704	0.890286	0.315	1.45657	0.066783	0.0629888	Rejected	Rejected
Q99829	Copine-1 [OS=Homo sapiens]	0.936194	0.408	1.53245	0.908911	0.314	1.32192	0.0586183	0.0630237	Rejected	Rejected
Q9BRP8	Partner of Y14 and mago [OS=Homo sapiens]	1.04113	0.568	1.32238	0.926585	0.312	1.33632	0.0495464	0.0630587	Rejected	Rejected
P46939-2	Isoform 2 of Utrophin [OS=Homo sapiens]	0.528915	0.127	1.98731	0.793022	0.312	2.03743	0.0740056	0.0630936	Rejected	Rejected
O75746	Calcium-binding mitochondrial carrier protein Aralar1 [OS=Homo sapiens]	1.45508	0.97	1.39821	0.891043	0.31	1.29733	0.0137474	0.0631285	Rejected	Rejected
Q9NYU2-1	UDP-glucose:glycoprotein glucosyltransferase 1 [OS=Homo sapiens]	0.0414302	0.139	28.0426	0.498751	0.31	4.26457	0.0729937	0.0631634	Rejected	Rejected
Q9H7B2	Ribosome production factor 2 homolog [OS=Homo sapiens]	1.19758	0.818	1.37958	0.926978	0.309	1.25431	0.0302861	0.0631983	Rejected	Rejected
Q15418-2	Isoform 2 of Ribosomal protein S6 kinase alpha-1 [OS=Homo sapiens]	0.958409	0.396	1.33337	0.929643	0.308	1.2279	0.059665	0.0632332	Rejected	Rejected
Q07954	prolow-density lipoprotein receptor-related protein 1 [OS=Homo sapiens]	0.807467	0.218	1.35656	0.904197	0.308	1.43975	0.0691556	0.0632682	Rejected	Rejected
O00273-1	DNA fragmentation factor subunit alpha [OS=Homo sapiens]	0.781664	0.166	1.50702	0.925459	0.308	1.23668	0.0714585	0.0633031	Rejected	Rejected
O75937	DnaJ homolog subfamily C member 8 [OS=Homo sapiens]	0.379032	0.013	2.18761	0.843077	0.307	1.74396	0.0804955	0.063338	Rejected	Rejected
Q9UBQ7	Glyoxylate reductase/hydroxypyruvate reductase [OS=Homo sapiens]	3.45916	0.926	3.65462	0.897832	0.306	1.52764	0.0194348	0.0633729	Rejected	Rejected
P23381	Tryptophan--tRNA ligase, cytoplasmic [OS=Homo sapiens]	3.11001	0.907	3.28868	0.733562	0.304	1.99789	0.0216329	0.0634078	Rejected	Rejected
Q9H2G2-1	STE20-like serine/threonine-protein kinase [OS=Homo sapiens]	1.43521	0.985	1.36048	0.897221	0.302	1.3521	0.0105722	0.0634427	Rejected	Rejected
O60437	periplakin [OS=Homo sapiens]	0.898162	0.306	1.43263	0.86915	0.3	1.47265	0.0645499	0.0634777	Rejected	Rejected
Q9Y657	Spindlin-1 [OS=Homo sapiens]	0.740881	0.086	1.42004	0.904831	0.3	1.2993	0.0762038	0.0635126	Rejected	Rejected
P52948-1	nuclear pore complex protein Nup98-Nup96 [OS=Homo sapiens]	2.071	0.935	2.24691	0.792958	0.299	2.18624	0.0185276	0.0635475	Rejected	Rejected
Q08AM6	Protein VAC14 homolog [OS=Homo sapiens]	0.991646	0.475	1.26293	0.914565	0.299	1.28564	0.055164	0.0635824	Rejected	Rejected
Q9BZE1	39S ribosomal protein L37, mitochondrial [OS=Homo sapiens]	0.929919	0.38	1.53869	0.90224	0.298	1.3714	0.0605373	0.0636173	Rejected	Rejected
P09417	dihydropteridine reductase [OS=Homo sapiens]	0.801358	0.215	1.58199	0.863263	0.298	1.60193	0.069365	0.0636522	Rejected	Rejected
Q9BWU0	kanadaptin [OS=Homo sapiens]	1.0286	0.558	1.41129	0.920098	0.297	1.36638	0.0502791	0.0636872	Rejected	Rejected
Q5ZPR3	CD276 antigen [OS=Homo sapiens]	0.997534	0.495	1.29425	0.901944	0.296	1.37057	0.0542219	0.0637221	Rejected	Rejected
Q9H0S4	Probable ATP-dependent RNA helicase DDX47 [OS=Homo sapiens]	0.93684	0.454	1.98863	0.833661	0.296	1.72273	0.0564201	0.063757	Rejected	Rejected
P48047	ATP synthase subunit O, mitochondrial [OS=Homo sapiens]	0.94326	0.404	1.52694	0.850201	0.296	1.65904	0.0588276	0.0637919	Rejected	Rejected
P52597	Heterogeneous nuclear ribonucleoprotein F [OS=Homo sapiens]	0.33219	0.099	3.54651	0.588199	0.296	4.94952	0.075157	0.0638268	Rejected	Rejected
O75718	Cartilage-associated protein [OS=Homo sapiens]	0.413516	0.065	2.48152	0.634191	0.296	2.38698	0.0772505	0.0638617	Rejected	Rejected
O43592	Exportin-T [OS=Homo sapiens]	1.2245	0.844	1.30571	0.911958	0.295	1.33353	0.0279833	0.0638966	Rejected	Rejected
Q8N3D4	EH domain-binding protein 1-like protein 1 [OS=Homo sapiens]	0.987776	0.462	1.42923	0.916697	0.295	1.31879	0.0560014	0.0639316	Rejected	Rejected
P36507	Dual specificity mitogen-activated protein kinase kinase 2 [OS=Homo sapiens]	1.40272	0.934	1.45794	0.864123	0.294	1.47081	0.0185973	0.0639665	Rejected	Rejected
Q8WX93-1	palladin [OS=Homo sapiens]	0.274498	0.026	2.67834	0.798473	0.294	1.99459	0.0797278	0.0640014	Rejected	Rejected
P35222	Catenin beta-1 [OS=Homo sapiens]	0.10607	0.025	7.75996	0.619084	0.293	5.86435	0.0798674	0.0640363	Rejected	Rejected
P62136-1	serine/threonine-protein phosphatase PP1-alpha catalytic subunit [OS=Homo sapiens]	4.124	0.985	3.70221	0.845422	0.292	1.77766	0.0104676	0.0640712	Rejected	Rejected
Q96A65	Exocyst complex component 4 [OS=Homo sapiens]	1.42119	0.943	1.42978	0.581742	0.292	2.17673	0.0175855	0.0641061	Rejected	Rejected
P42695	condensin-2 complex subunit D3 [OS=Homo sapiens]	0.930575	0.4	1.38959	0.852483	0.292	1.56771	0.0592812	0.0641411	Rejected	Rejected
P25205-2	Isoform 2 of DNA replication licensing factor MCM3 [OS=Homo sapiens]	0.726359	0.296	2.69843	0.751602	0.292	2.33152	0.0650035	0.064176	Rejected	Rejected
P67775	Serine/threonine-protein phosphatase 2A catalytic subunit alpha isoform [OS=Homo sapiens]	1.25573	0.633	3.10872	0.418959	0.291	8.45486	0.0441382	0.0642109	Rejected	Rejected
P06730-2	Isoform 2 of Eukaryotic translation initiation factor 4E [OS=Homo sapiens]	2.99407	0.948	2.99822	0.870925	0.289	1.43115	0.0169923	0.0642458	Rejected	Rejected
P26196	Probable ATP-dependent RNA helicase DDX6 [OS=Homo sapiens]	1.13666	0.782	1.29952	0.94577	0.289	1.15379	0.0332868	0.0642807	Rejected	Rejected
Q9Y520-7	Isoform 7 of Protein PRRC2C [OS=Homo sapiens]	0.885779	0.364	1.47027	0.892579	0.288	1.38829	0.0614096	0.0643156	Rejected	Rejected
P24666-1	Low molecular weight phosphotyrosine protein phosphatase [OS=Homo sapiens]	0.603993	0.358	2.25256	0.731237	0.288	2.15962	0.0618632	0.0643506	Rejected	Rejected
Q71DI3	histone H3.2 [OS=Homo sapiens]	0.872948	0.325	1.60608	0.193901	0.288	6.20778	0.0635031	0.0643855	Rejected	Rejected
Q16718	NADH dehydrogenase [ubiquinone] 1 alpha subcomplex subunit 5 [OS=Homo sapiens]	1.06734	0.672	1.31066	0.925827	0.287	1.24747	0.0415562	0.0644204	Rejected	Rejected
P15586	N-acetylglucosamine-6-sulfatase [OS=Homo sapiens]	0.462499	0.167	2.60126	0.791818	0.287	2.38784	0.0713887	0.0644553	Rejected	Rejected
P16435	NADPH--cytochrome P450 reductase [OS=Homo sapiens]	0.241963	0.11	5.87441	0.697867	0.287	2.34089	0.0747034	0.0644902	Rejected	Rejected
Q8NFZ8	Cell adhesion molecule 4 [OS=Homo sapiens]	1.40688	0.905	1.5049	0.870529	0.286	1.50283	0.021947	0.0645251	Rejected	Rejected
P33992	DNA replication licensing factor mcm5 [OS=Homo sapiens]	1.13153	0.601	2.38421	0.814523	0.285	1.73823	0.0469295	0.0645601	Rejected	Rejected
Q9UI42-1	Carboxypeptidase A4 [OS=Homo sapiens]	0.980117	0.486	1.51216	0.879264	0.285	1.44658	0.0546755	0.064595	Rejected	Rejected
Q9Y613	FH1/FH2 domain-containing protein 1 [OS=Homo sapiens]	0.296432	0.127	3.87501	0.860063	0.285	1.53905	0.0740405	0.0646299	Rejected	Rejected
Q9Y2Z0-1	Protein SGT1 homolog [OS=Homo sapiens]	1.42086	0.709	2.35527	0.682827	0.284	2.01739	0.0388346	0.0646648	Rejected	Rejected
P56134	ATP synthase subunit f, mitochondrial [OS=Homo sapiens]	0.933433	0.375	1.39038	0.891908	0.284	1.44083	0.0608514	0.0646997	Rejected	Rejected
P31937	3-hydroxyisobutyrate dehydrogenase, mitochondrial [OS=Homo sapiens]	0.964729	0.396	1.25861	0.883558	0.283	1.32975	0.0596301	0.0647346	Rejected	Rejected
P55884-2	Isoform 2 of Eukaryotic translation initiation factor 3 subunit B [OS=Homo sapiens]	1.03569	0.548	1.87113	0.745361	0.282	2.03127	0.0510816	0.0647696	Rejected	Rejected
Q8NCA5	protein FAM98A [OS=Homo sapiens]	0.33838	0.05	2.93182	0.868816	0.282	1.44605	0.0781926	0.0648045	Rejected	Rejected
Q99459	Cell division cycle 5-like protein [OS=Homo sapiens]	0.731813	0.233	1.96838	0.767014	0.281	2.2697	0.0684927	0.0648394	Rejected	Rejected
O95147	Dual specificity protein phosphatase 14 [OS=Homo sapiens]	0.382537	0.039	2.50088	0.40872	0.279	3.54479	0.0788555	0.0648743	Rejected	Rejected
Q6PJT7-1	Zinc finger CCCH domain-containing protein 14 [OS=Homo sapiens]	1.56959	0.869	1.66942	0.884674	0.278	1.31327	0.0255757	0.0649092	Rejected	Rejected
Q9NUJ1	Mycophenolic acid acyl-glucuronide esterase, mitochondrial [OS=Homo sapiens]	0.980103	0.448	1.53761	0.882875	0.278	1.4471	0.0567341	0.0649441	Rejected	Rejected
Q3LXA3	Triokinase/FMN cyclase [OS=Homo sapiens]	0.784494	0.138	1.41473	0.882618	0.276	1.37794	0.0731682	0.0649791	Rejected	Rejected
O96008	Mitochondrial import receptor subunit TOM40 homolog [OS=Homo sapiens]	0.665717	0.433	2.21376	0.756718	0.274	1.57008	0.0573622	0.065014	Rejected	Rejected
Q9NPI6	mRNA-decapping enzyme 1A [OS=Homo sapiens]	0.850455	0.252	1.48499	0.86609	0.272	1.50951	0.0676902	0.0650489	Rejected	Rejected
P18621-3	Isoform 3 of 60S ribosomal protein L17 [OS=Homo sapiens]	0.34586	0.023	2.4982	0.805265	0.272	1.98784	0.080007	0.0650838	Rejected	Rejected
P62241	40S ribosomal protein S8 [OS=Homo sapiens]	2.42143	0.955	2.37557	0.721063	0.271	2.46357	0.0159456	0.0651187	Rejected	Rejected
P18615-3	Isoform 2 of Negative elongation factor E [OS=Homo sapiens]	0.521873	0.003	1.56407	0.870784	0.271	1.37401	0.0811235	0.0651536	Rejected	Rejected
Q9Y5Q9	General transcription factor 3C polypeptide 3 [OS=Homo sapiens]	1.09222	0.636	1.407	0.875721	0.27	1.35435	0.043859	0.0651885	Rejected	Rejected
Q14558-2	Isoform 2 of Phosphoribosyl pyrophosphate synthase-associated protein 1 [OS=Homo sapiens]	0.956998	0.491	1.25532	0.910228	0.27	1.26035	0.0544313	0.0652235	Rejected	Rejected
P49643-1	DNA primase large subunit [OS=Homo sapiens]	1.24708	0.897	1.32529	0.854846	0.269	1.51019	0.0227146	0.0652584	Rejected	Rejected
Q13363-1	C-terminal-binding protein 1 [OS=Homo sapiens]	1.22138	0.79	1.3909	0.734407	0.269	2.54711	0.0323796	0.0652933	Rejected	Rejected
Q9Y281-1	Cofilin-2 [OS=Homo sapiens]	0.735101	0.31	2.89885	0.824721	0.269	1.78899	0.0643754	0.0653282	Rejected	Rejected
O76071	Probable cytosolic iron-sulfur protein assembly protein Ciao1 [OS=Homo sapiens]	6.81866	0.887	7.74658	0.307063	0.268	3.62822	0.023866	0.0653631	Rejected	Rejected
O00629	Importin subunit alpha-3 [OS=Homo sapiens]	0.972055	0.426	1.33871	0.868462	0.268	1.45785	0.0576413	0.065398	Rejected	Rejected
P58107	epiplakin [OS=Homo sapiens]	0.921458	0.372	1.38675	0.874012	0.267	1.38006	0.0610607	0.065433	Rejected	Rejected
P60891	ribose-phosphate pyrophosphokinase 1 [OS=Homo sapiens]	0.872403	0.274	1.41577	0.941857	0.267	1.1928	0.0660154	0.0654679	Rejected	Rejected
Q9Y224	UPF0568 protein C14orf166 [OS=Homo sapiens]	2.0765	0.906	2.30407	0.648849	0.266	2.0234	0.0217725	0.0655028	Rejected	Rejected
Q01081	Splicing factor U2AF 35 kDa subunit [OS=Homo sapiens]	0.626271	0.158	1.98559	0.867571	0.266	1.47692	0.0719121	0.0655377	Rejected	Rejected
Q13547	histone deacetylase 1 [OS=Homo sapiens]	7.30409	0.92	8.41267	0.575333	0.264	3.8048	0.0202722	0.0655726	Rejected	Rejected
Q96CT7	Coiled-coil domain-containing protein 124 [OS=Homo sapiens]	1.02745	0.531	1.56419	0.892719	0.264	1.27153	0.0520237	0.0656075	Rejected	Rejected
O75489	NADH dehydrogenase [ubiquinone] iron-sulfur protein 3, mitochondrial [OS=Homo sapiens]	0.756674	0.089	1.39251	0.877632	0.264	1.43189	0.07582	0.0656425	Rejected	Rejected
O95825-1	Quinone oxidoreductase-like protein 1 [OS=Homo sapiens]	0.24426	0.011	2.71501	0.779052	0.264	2.15624	0.080635	0.0656774	Rejected	Rejected
Q9Y5B9	FACT complex subunit SPT16 [OS=Homo sapiens]	0.658023	0.477	3.48167	0.788808	0.263	1.85305	0.0549895	0.0657123	Rejected	Rejected
P48059-3	Isoform 3 of LIM and senescent cell antigen-like-containing domain protein 1 [OS=Homo sapiens]	1.2578	0.868	1.37974	0.82414	0.258	1.54513	0.0256455	0.0657472	Rejected	Rejected
Q7Z2T5-1	TRMT1-like protein [OS=Homo sapiens]	1.10939	0.728	1.30315	0.720666	0.258	1.64207	0.0374389	0.0657821	Rejected	Rejected
Q9BQE3	Tubulin alpha-1C chain [OS=Homo sapiens]	0.10946	0.002	5.15008	0.705766	0.258	2.12153	0.0811584	0.065817	Rejected	Rejected
Q9ULC4-3	Isoform 3 of Malignant T-cell-amplified sequence 1 [OS=Homo sapiens]	3.83127	0.963	3.76195	0.83021	0.257	1.57617	0.0148639	0.065852	Rejected	Rejected
Q96QK1	Vacuolar protein sorting-associated protein 35 [OS=Homo sapiens]	1.13701	0.78	1.29938	0.8292	0.257	1.5075	0.0335311	0.0658869	Rejected	Rejected
Q9BPX3	Condensin complex subunit 3 [OS=Homo sapiens]	0.596441	0.401	2.23078	0.773673	0.257	1.58787	0.0591068	0.0659218	Rejected	Rejected
O75306-1	NADH dehydrogenase [ubiquinone] iron-sulfur protein 2, mitochondrial [OS=Homo sapiens]	0.649572	0.024	1.43978	0.143472	0.256	7.93366	0.0799023	0.0659567	Rejected	Rejected
P22695	Cytochrome b-c1 complex subunit 2, mitochondrial [OS=Homo sapiens]	0.572248	0.004	1.44133	0.846081	0.256	1.49305	0.0809491	0.0659916	Rejected	Rejected
Q5SRD1	Putative mitochondrial import inner membrane translocase subunit Tim23B [OS=Homo sapiens]	1.07252	0.649	1.2645	0.858629	0.255	1.49063	0.0429867	0.0660265	Rejected	Rejected
O15460-1	Prolyl 4-hydroxylase subunit alpha-2 [OS=Homo sapiens]	0.330336	0.04	2.92246	0.701631	0.255	2.54288	0.0786811	0.0660615	Rejected	Rejected
P59998-3	Isoform 3 of Actin-related protein 2/3 complex subunit 4 [OS=Homo sapiens]	1.03203	0.578	1.30193	0.862739	0.254	1.50219	0.0486741	0.0660964	Rejected	Rejected
Q15056-1	Eukaryotic translation initiation factor 4H [OS=Homo sapiens]	0.946977	0.453	2.69422	0.796466	0.254	13.0988	0.0564899	0.0661313	Rejected	Rejected
P14324	Farnesyl pyrophosphate synthase [OS=Homo sapiens]	1.1319	0.734	1.32359	0.851847	0.253	1.42342	0.0369505	0.0661662	Rejected	Rejected
O75691	Small subunit processome component 20 homolog [OS=Homo sapiens]	1.05852	0.595	1.46564	0.868387	0.253	1.3567	0.0474878	0.0662011	Rejected	Rejected
O94776	Metastasis-associated protein MTA2 [OS=Homo sapiens]	0.546032	0.087	2.01716	0.801002	0.252	1.74427	0.0759595	0.066236	Rejected	Rejected
Q9NSD9	Phenylalanine--tRNA ligase beta subunit [OS=Homo sapiens]	0.463991	0.049	2.22141	0.774861	0.251	1.87167	0.0782275	0.0662709	Rejected	Rejected
P12270	Nucleoprotein TPR [OS=Homo sapiens]	1.32705	0.517	3.10626	0.736815	0.25	2.05318	0.052582	0.0663059	Rejected	Rejected
Q9UQN3-1	Charged multivesicular body protein 2b [OS=Homo sapiens]	2.00704	0.896	2.53276	0.608008	0.249	3.07846	0.0227844	0.0663408	Rejected	Rejected
Q13283	Ras GTPase-activating protein-binding protein 1 [OS=Homo sapiens]	2.11798	0.831	2.93922	0.688332	0.249	2.44234	0.02903	0.0663757	Rejected	Rejected
Q9NYF8-1	Bcl-2-associated transcription factor 1 [OS=Homo sapiens]	1.74007	0.878	1.95481	0.762068	0.248	1.88196	0.0246336	0.0664106	Rejected	Rejected
Q9Y5P6-2	Isoform 2 of Mannose-1-phosphate guanyltransferase beta [OS=Homo sapiens]	0.941748	0.372	1.31325	0.888731	0.248	1.33308	0.0610956	0.0664455	Rejected	Rejected
O60684	Importin subunit alpha-7 [OS=Homo sapiens]	0.862384	0.237	1.36882	0.882307	0.248	1.37553	0.0682135	0.0664804	Rejected	Rejected
Q9BVC6	Transmembrane protein 109 [OS=Homo sapiens]	1.05415	0.536	1.58523	0.822925	0.247	1.52192	0.0516399	0.0665154	Rejected	Rejected
P18077	60S ribosomal protein L35a [OS=Homo sapiens]	1.55013	0.878	1.83263	0.729219	0.246	2.26923	0.0247383	0.0665503	Rejected	Rejected
P46977	Dolichyl-diphosphooligosaccharide--protein glycosyltransferase subunit STT3A [OS=Homo sapiens]	0.860779	0.252	1.37625	0.850423	0.245	1.43515	0.0676204	0.0665852	Rejected	Rejected
Q6NUQ4	Transmembrane protein 214 [OS=Homo sapiens]	1.04789	0.6	2.18635	0.682631	0.244	2.40343	0.0470691	0.0666201	Rejected	Rejected
O95400	CD2 antigen cytoplasmic tail-binding protein 2 [OS=Homo sapiens]	2.0681	0.797	3.82649	0.571412	0.243	5.13456	0.0318214	0.066655	Rejected	Rejected
Q9GZT4	serine racemase [OS=Homo sapiens]	1.04465	0.535	1.29693	0.857667	0.243	1.42933	0.0517446	0.0666899	Rejected	Rejected
O43815	striatin [OS=Homo sapiens]	0.76115	0.092	1.37675	0.835413	0.243	1.52894	0.0756106	0.0667249	Rejected	Rejected
P49189	4-trimethylaminobutyraldehyde dehydrogenase [OS=Homo sapiens]	0.827466	0.392	3.86334	0.462809	0.242	3.7941	0.0598744	0.0667598	Rejected	Rejected
Q9UKD2	mRNA turnover protein 4 homolog [OS=Homo sapiens]	0.912028	0.315	1.39948	0.911462	0.242	1.27584	0.064201	0.0667947	Rejected	Rejected
Q6ZMI0-1	Protein phosphatase 1 regulatory subunit 21 [OS=Homo sapiens]	0.860105	0.266	1.40797	0.914152	0.241	1.23539	0.0668179	0.0668296	Rejected	Rejected
Q9UKF6	Cleavage and polyadenylation specificity factor subunit 3 [OS=Homo sapiens]	1.52096	0.949	1.52258	0.832372	0.24	1.51926	0.0168876	0.0668645	Rejected	Rejected
P16989-1	Y-box-binding protein 3 [OS=Homo sapiens]	0.810046	0.252	1.5866	0.854147	0.24	1.37179	0.0675855	0.0668994	Rejected	Rejected
P35637-1	RNA-binding protein FUS [OS=Homo sapiens]	0.91849	0.459	2.02186	0.863207	0.239	1.41234	0.0561061	0.0669344	Rejected	Rejected
P62906	60S ribosomal protein L10A [OS=Homo sapiens]	0.414721	0.158	3.00598	0.773984	0.239	1.93335	0.0718423	0.0669693	Rejected	Rejected
P31930	Cytochrome b-c1 complex subunit 1, mitochondrial [OS=Homo sapiens]	1.04746	0.546	1.74013	0.729965	0.238	2.00661	0.0512212	0.0670042	Rejected	Rejected
Q13190	Syntaxin-5 [OS=Homo sapiens]	0.464462	0.194	2.69404	0.847976	0.238	1.45369	0.0699581	0.0670391	Rejected	Rejected
Q9UKN8	General transcription factor 3C polypeptide 4 [OS=Homo sapiens]	0.598746	0.046	1.66027	0.876627	0.238	1.4295	0.0784717	0.067074	Rejected	Rejected
Q12797	Aspartyl/Asparaginyl beta-hydroxylase [OS=Homo sapiens]	1.17944	0.856	1.2784	0.882522	0.237	1.30009	0.0269714	0.0671089	Rejected	Rejected
Q14669-3	Isoform 3 of E3 ubiquitin-protein ligase TRIP12 [OS=Homo sapiens]	1.12693	0.781	1.22793	0.841124	0.237	1.43668	0.0334264	0.0671439	Rejected	Rejected
Q15637-5	Isoform 5 of Splicing factor 1 [OS=Homo sapiens]	2.22797	0.62	3.70432	0.387798	0.237	3.11367	0.0453594	0.0671788	Rejected	Rejected
P49458	Signal recognition particle 9 kDa protein [OS=Homo sapiens]	0.402089	0.01	2.23173	0.839493	0.237	1.35746	0.0807048	0.0672137	Rejected	Rejected
P40123	Adenylyl cyclase-associated protein 2 [OS=Homo sapiens]	1.32923	0.959	1.3218	0.811997	0.236	1.61151	0.0154571	0.0672486	Rejected	Rejected
O43399-7	Isoform 7 of Tumor protein D54 [OS=Homo sapiens]	0.74343	0.096	1.44196	0.533042	0.236	2.47953	0.0753315	0.0672835	Rejected	Rejected
Q7Z417	Nuclear fragile X mental retardation-interacting protein 2 [OS=Homo sapiens]	1.36271	0.907	1.48068	0.79824	0.235	1.74406	0.0217376	0.0673184	Rejected	Rejected
P49770	Translation initiation factor eIF-2B subunit beta [OS=Homo sapiens]	1.13858	0.779	1.33111	0.935192	0.235	1.16852	0.0337404	0.0673534	Rejected	Rejected
Q96AY3	Peptidyl-prolyl cis-trans isomerase FKBP10 [OS=Homo sapiens]	1.06053	0.59	1.55753	0.816312	0.235	1.52126	0.0477669	0.0673883	Rejected	Rejected
O15372	Eukaryotic translation initiation factor 3 subunit H [OS=Homo sapiens]	0.869871	0.214	1.27415	0.833793	0.233	1.44749	0.0694348	0.0674232	Rejected	Rejected
Q8NF37	Lysophosphatidylcholine acyltransferase 1 [OS=Homo sapiens]	0.55447	0.027	1.70096	0.889642	0.233	1.3284	0.0796581	0.0674581	Rejected	Rejected
Q16576-2	Isoform 2 of Histone-binding protein RBBP7 [OS=Homo sapiens]	0.60833	0.007	1.44523	0.823023	0.233	1.5666	0.0807746	0.067493	Rejected	Rejected
P09496-2	Isoform Non-brain of Clathrin light chain A [OS=Homo sapiens]	1.14524	0.615	1.71249	0.87089	0.232	1.41211	0.045813	0.0675279	Rejected	Rejected
Q9H6W3	Bifunctional lysine-specific demethylase and histidyl-hydroxylase NO66 [OS=Homo sapiens]	0.998451	0.481	1.55442	0.822347	0.232	1.58341	0.0548151	0.0675628	Rejected	Rejected
Q9H8H0	nucleolar protein 11 [OS=Homo sapiens]	1.14833	0.839	1.26088	0.907512	0.231	1.22385	0.0286113	0.0675978	Rejected	Rejected
Q8IXT5	RNA-binding protein 12B [OS=Homo sapiens]	1.11278	0.75	1.29516	0.836418	0.23	1.45166	0.0360782	0.0676327	Rejected	Rejected
P15374	Ubiquitin carboxyl-terminal hydrolase isozyme L3 [OS=Homo sapiens]	2.11487	0.915	2.19852	0.714444	0.229	2.36984	0.0209351	0.0676676	Rejected	Rejected
Q9H4I2	zinc fingers and homeoboxes protein 3 [OS=Homo sapiens]	0.753194	0.492	6.64153	0.489893	0.228	3.0462	0.0543964	0.0677025	Rejected	Rejected
P24752	Acetyl-CoA acetyltransferase, mitochondrial [OS=Homo sapiens]	2.89867	0.976	2.39138	0.745776	0.227	2.05304	0.0126308	0.0677374	Rejected	Rejected
Q15286	Ras-related protein Rab-35 [OS=Homo sapiens]	0.678811	0.14	1.72913	0.875374	0.227	1.35561	0.0729239	0.0677723	Rejected	Rejected
Q9UNS2	COP9 signalosome complex subunit 3 [OS=Homo sapiens]	0.431582	0.042	2.51383	0.527493	0.227	3.14915	0.0785764	0.0678073	Rejected	Rejected
P40939	Trifunctional enzyme subunit alpha, mitochondrial [OS=Homo sapiens]	0.891776	0.381	1.62565	0.751964	0.226	1.86718	0.0602233	0.0678422	Rejected	Rejected
Q13405	39S ribosomal protein L49, mitochondrial [OS=Homo sapiens]	1.98236	0.544	2.94441	0.837512	0.225	1.45639	0.051291	0.0678771	Rejected	Rejected
Q15437	protein transport protein Sec23B [OS=Homo sapiens]	0.950242	0.401	1.45963	0.834738	0.225	1.55612	0.0591766	0.067912	Rejected	Rejected
P67870	Casein kinase II subunit beta [OS=Homo sapiens]	0.921141	0.378	1.47837	0.901865	0.225	1.28163	0.0606769	0.0679469	Rejected	Rejected
Q9BWD1	Acetyl-CoA acetyltransferase, cytosolic [OS=Homo sapiens]	1.01264	0.498	1.31874	0.634891	0.224	2.10357	0.0537683	0.0679818	Rejected	Rejected
Q9H444	Charged multivesicular body protein 4b [OS=Homo sapiens]	0.489845	0.143	4.60839	0.0359247	0.224	31.0996	0.072889	0.0680168	Rejected	Rejected
Q01082-1	Spectrin beta chain, non-erythrocytic 1 [OS=Homo sapiens]	4.57317	0.767	8.30273	0.767605	0.223	1.82126	0.0349965	0.0680517	Rejected	Rejected
P50897	Palmitoyl-protein thioesterase 1 [OS=Homo sapiens]	0.605285	0.299	2.57246	0.807729	0.223	1.41892	0.064829	0.0680866	Rejected	Rejected
Q9UHD8-1	Septin-9 [OS=Homo sapiens]	1.6668	0.998	1.42125	0.835694	0.222	1.44371	0.00523378	0.0681215	Enriched	Rejected
Q92817	Envoplakin [OS=Homo sapiens]	3.89549	0.952	3.88827	0.896026	0.222	1.27985	0.0163294	0.0681564	Rejected	Rejected
Q9NVI7-2	Isoform 2 of ATPase family AAA domain-containing protein 3A [OS=Homo sapiens]	0.696747	0.04	1.47917	0.87981	0.222	1.3219	0.078716	0.0681913	Rejected	Rejected
Q9UI30	Multifunctional methyltransferase subunit TRM112-like protein [OS=Homo sapiens]	4.5621	0.999	2.5482	0.400719	0.221	3.34812	0.00495464	0.0682263	Enriched	Rejected
Q9HD42-1	Charged multivesicular body protein 1a [OS=Homo sapiens]	1.37584	0.645	1.80691	0.519371	0.221	2.28224	0.0432659	0.0682612	Rejected	Rejected
P32970	CD70 antigen [OS=Homo sapiens]	1.30047	0.618	1.66368	0.757595	0.22	1.50848	0.0456734	0.0682961	Rejected	Rejected
P49916-1	DNA ligase 3 [OS=Homo sapiens]	0.972603	0.471	1.46093	0.821356	0.22	1.49212	0.0553036	0.068331	Rejected	Rejected
O95861-2	Isoform 2 of 3'(2'),5'-bisphosphate nucleotidase 1 [OS=Homo sapiens]	0.943947	0.446	3.17691	0.864668	0.219	1.27316	0.0568039	0.0683659	Rejected	Rejected
Q13555-6	Isoform 6 of Calcium/calmodulin-dependent protein kinase type II subunit gamma [OS=Homo sapiens]	0.907612	0.298	1.31781	0.85454	0.219	1.34324	0.0649337	0.0684008	Rejected	Rejected
P32322-3	Isoform 3 of Pyrroline-5-carboxylate reductase 1, mitochondrial [OS=Homo sapiens]	0.881913	0.255	1.36578	0.851729	0.218	1.4133	0.0673412	0.0684358	Rejected	Rejected
Q8IUC1	keratin-associated protein 11-1 [OS=Homo sapiens]	122.421	0.989	111.946	0.0264501	0.217	52.5243	0.00928123	0.0684707	Rejected	Rejected
P37268	squalene synthase [OS=Homo sapiens]	2.35565	0.659	3.72268	0.814022	0.217	1.53804	0.0423238	0.0685056	Rejected	Rejected
P35520-2	Isoform 2 of Cystathionine beta-synthase [OS=Homo sapiens]	0.843127	0.292	1.54187	0.851178	0.217	1.4082	0.0652128	0.0685405	Rejected	Rejected
Q96IJ6-2	Isoform 2 of Mannose-1-phosphate guanyltransferase alpha [OS=Homo sapiens]	0.907944	0.196	1.19314	0.857864	0.217	1.36124	0.0698535	0.0685754	Rejected	Rejected
O94822-3	Isoform 3 of E3 ubiquitin-protein ligase listerin [OS=Homo sapiens]	1.056	0.623	1.28498	0.834315	0.216	1.338	0.04515	0.0686103	Rejected	Rejected
Q9UH65	Switch-associated protein 70 [OS=Homo sapiens]	2.5368	0.944	2.55977	0.309479	0.215	4.27592	0.0173761	0.0686453	Rejected	Rejected
Q9NP79	Vacuolar protein sorting-associated protein VTA1 homolog [OS=Homo sapiens]	3.0827	0.828	3.90755	0.888171	0.215	1.25079	0.0296581	0.0686802	Rejected	Rejected
Q13247	Serine/arginine-rich splicing factor 6 [OS=Homo sapiens]	1.12384	0.622	1.58782	0.589502	0.215	2.71945	0.0451849	0.0687151	Rejected	Rejected
Q99961	Endophilin-A2 [OS=Homo sapiens]	1.34044	0.947	1.35761	0.841947	0.214	1.41354	0.0170621	0.06875	Rejected	Rejected
Q9Y2D5-4	Isoform 2 of A-kinase anchor protein 2 [OS=Homo sapiens]	1.30957	0.85	1.50622	0.865683	0.214	1.3147	0.0274948	0.0687849	Rejected	Rejected
Q6AI08	HEAT repeat-containing protein 6 [OS=Homo sapiens]	1.12286	0.661	1.51546	0.879295	0.214	1.33405	0.0421493	0.0688198	Rejected	Rejected
Q9BQ52-1	Zinc phosphodiesterase ELAC protein 2 [OS=Homo sapiens]	0.98287	0.444	1.31561	0.85655	0.213	1.36735	0.0569086	0.0688547	Rejected	Rejected
Q13423	NAD(P) transhydrogenase, mitochondrial [OS=Homo sapiens]	1.15223	0.642	1.70351	0.531531	0.212	2.09429	0.0434752	0.0688897	Rejected	Rejected
Q8IZD4	mRNA-decapping enzyme 1B [OS=Homo sapiens]	0.937072	0.291	1.21446	0.859117	0.212	1.41326	0.0652477	0.0689246	Rejected	Rejected
Q96I24-1	Far upstream element-binding protein 3 [OS=Homo sapiens]	1.67167	0.595	2.22299	0.845904	0.211	1.32769	0.0474529	0.0689595	Rejected	Rejected
Q16537	Serine/threonine-protein phosphatase 2A 56 kDa regulatory subunit epsilon isoform [OS=Homo sapiens]	0.634896	0.062	1.57603	0.889795	0.21	1.20329	0.077425	0.0689944	Rejected	Rejected
Q96FX7	tRNA (adenine(58)-N(1))-methyltransferase catalytic subunit TRMT61A [OS=Homo sapiens]	0.914974	0.315	1.29861	0.794022	0.208	1.54519	0.0642359	0.0690293	Rejected	Rejected
Q15031	Probable Leucine--tRNA ligase, mitochondrial [OS=Homo sapiens]	1.22007	0.795	1.54934	0.831784	0.207	1.42828	0.0319958	0.0690642	Rejected	Rejected
O43251-8	Isoform 8 of RNA binding protein fox-1 homolog 2 [OS=Homo sapiens]	1.16355	0.726	1.61235	0.804558	0.207	1.49544	0.0375785	0.0690992	Rejected	Rejected
Q00534	Cyclin-dependent kinase 6 [OS=Homo sapiens]	1.03971	0.578	1.3106	0.849428	0.207	1.41113	0.0486392	0.0691341	Rejected	Rejected
Q9BRX5-3	Isoform 3 of DNA replication complex GINS protein PSF3 [OS=Homo sapiens]	1.2435	0.876	1.35139	0.85862	0.206	1.38858	0.0249128	0.069169	Rejected	Rejected
Q9UK45	U6 snRNA-associated Sm-like protein LSm7 [OS=Homo sapiens]	1.18816	0.815	1.34787	0.850417	0.206	1.35669	0.0305304	0.0692039	Rejected	Rejected
Q86XZ4	Spermatogenesis-associated serine-rich protein 2 [OS=Homo sapiens]	0.841023	0.189	1.34687	0.826804	0.206	1.38639	0.0700977	0.0692388	Rejected	Rejected
P50552	Vasodilator-stimulated phosphoprotein [OS=Homo sapiens]	1.30519	0.922	1.35285	0.751482	0.204	1.71502	0.0199232	0.0692737	Rejected	Rejected
P51452	dual specificity protein phosphatase 3 [OS=Homo sapiens]	0.452081	0.175	2.47157	0.857982	0.204	1.39245	0.0709351	0.0693087	Rejected	Rejected
O00567	Nucleolar protein 56 [OS=Homo sapiens]	2.26528	0.774	10.301	0.56016	0.203	3.5815	0.0342638	0.0693436	Rejected	Rejected
P62495	Eukaryotic peptide chain release factor subunit 1 [OS=Homo sapiens]	0.736651	0.077	1.39055	0.831269	0.203	1.36905	0.0765527	0.0693785	Rejected	Rejected
O60826	Coiled-coil domain-containing protein 22 [OS=Homo sapiens]	0.932052	0.406	1.47366	0.878995	0.202	1.29682	0.058723	0.0694134	Rejected	Rejected
Q9NUJ3	T-complex protein 11-like protein 1 [OS=Homo sapiens]	1.01761	0.531	1.30638	0.851915	0.201	1.35289	0.0520586	0.0694483	Rejected	Rejected
O75323-1	Protein NipSnap homolog 2 [OS=Homo sapiens]	0.95528	0.442	1.45002	0.852008	0.201	1.34863	0.0570133	0.0694832	Rejected	Rejected
O60749	Sorting nexin-2 [OS=Homo sapiens]	0.137837	0.18	10.0154	0.205419	0.201	7.10715	0.0706211	0.0695182	Rejected	Rejected
P39019	40S ribosomal protein S19 [OS=Homo sapiens]	1.62971	0.923	1.70599	0.64248	0.2	2.20785	0.0197837	0.0695531	Rejected	Rejected
P50213-1	Isocitrate dehydrogenase [NAD] subunit alpha, mitochondrial [OS=Homo sapiens]	1.27754	0.588	1.88898	0.79441	0.2	1.61641	0.0479763	0.069588	Rejected	Rejected
Q15067	Peroxisomal acyl-coenzyme A oxidase 1 [OS=Homo sapiens]	1.05433	0.565	1.43797	0.796306	0.2	1.50742	0.0497558	0.0696229	Rejected	Rejected
P09471-1	Guanine nucleotide-binding protein G(O) subunit alpha [OS=Homo sapiens]	0.78873	0.137	1.37376	0.829819	0.2	1.39053	0.0733426	0.0696578	Rejected	Rejected
P12004	proliferating cell nuclear antigen [OS=Homo sapiens]	1.7267	0.797	2.7024	0.756113	0.199	1.74079	0.0317516	0.0696927	Rejected	Rejected
O15212	Prefoldin subunit 6 [OS=Homo sapiens]	1.08341	0.592	1.69483	0.79813	0.199	1.61942	0.0476274	0.0697277	Rejected	Rejected
Q6A163	Keratin, type I cytoskeletal 39 [OS=Homo sapiens]	1.1345	0.645	1.58539	0.626692	0.197	1.96783	0.0431612	0.0697626	Rejected	Rejected
Q96C86	M7GpppX diphosphatase [OS=Homo sapiens]	0.985901	0.497	1.54328	0.819962	0.197	1.46992	0.0540475	0.0697975	Rejected	Rejected
[truncated: 340 more rows]
