# Supplementary material for: Proteome-wide identification of HSP70/HSC70 chaperone clients in human cells
Source: PLoS Biol. 2020 Jul 20;18(7):e3000606. doi: 10.1371/journal.pbio.3000606 (PMC7392334; doi:10.1371/journal.pbio.3000606)
Supplement: S3 Data — HSP, heat shock protein. (XLSX) [file pbio.3000606.s010.xlsx]

## Sheet: Summary
UNIPROT accession numbers and descriptions are shown for HSP70 BIOID2 from 12 streptavidin isolations.
For each experiment, an enrichment score is shown, based on label-free quantification of bound targets by mass spectrometry and normalization with total peptide counts. Percentile score is calculated based on a boot-strapping method (see Experimental procedures) and is compared with 95 percentile value to determine significance and is then filtered using the Benjamini-Hochberg procedure for reduc…

## Sheet: HSP70 BioID
Uniprot Accession	Description	Enrichment Score	95% Cutoff	Q 0.05	Q 0.10	Q 0.25	FDR 0.05 Enrichment	FDR 0.1 Cutoff	FDR 0.25 Cutoff
Q99614	tetratricopeptide repeat protein 1 [OS=Homo sapiens]	6.92003	1.76191	5.40541e-05	0.000108108	0.00027027	Enriched	Enriched	Enriched
Q7Z589-7	Isoform 7 of BRCA2-interacting transcriptional repressor EMSY [OS=Homo sapiens]	7.32	1.9753	0.000108108	0.000216216	0.000540541	Enriched	Enriched	Enriched
Q15942	Zyxin [OS=Homo sapiens]	4.33961	1.84798	0.000162162	0.000324324	0.000810811	Enriched	Enriched	Enriched
O15027-5	Isoform 5 of Protein transport protein Sec16A [OS=Homo sapiens]	3.19549	2.00704	0.000216216	0.000432432	0.00108108	Enriched	Enriched	Enriched
Q9BTE6-3	Isoform 3 of Alanyl-tRNA editing protein Aarsd1 [OS=Homo sapiens]	7.25508	2.16336	0.00027027	0.000540541	0.00135135	Enriched	Enriched	Enriched
O43707	Alpha-actinin-4 [OS=Homo sapiens]	6.51539	2.55769	0.000324324	0.000648649	0.00162162	Enriched	Enriched	Enriched
Q9UQN3-1	Charged multivesicular body protein 2b [OS=Homo sapiens]	3.36707	1.77403	0.000378378	0.000756757	0.00189189	Enriched	Enriched	Enriched
Q07617	Sperm-associated antigen 1 [OS=Homo sapiens]	12.9884	2.2425	0.000432432	0.000864865	0.00216216	Enriched	Enriched	Enriched
P22314	Ubiquitin-like modifier-activating enzyme 1 [OS=Homo sapiens]	3.41337	1.72031	0.000486486	0.000972973	0.00243243	Enriched	Enriched	Enriched
Q93052	Lipoma-preferred partner [OS=Homo sapiens]	3.89498	1.89872	0.000540541	0.00108108	0.0027027	Enriched	Enriched	Enriched
Q9UKK9	ADP-sugar pyrophosphatase [OS=Homo sapiens]	4.06153	1.80814	0.000594595	0.00118919	0.00297297	Enriched	Enriched	Enriched
P78371-1	T-complex protein 1 subunit beta [OS=Homo sapiens]	12.7515	2.69938	0.000648649	0.0012973	0.00324324	Enriched	Enriched	Enriched
P31689-1	DnaJ homolog subfamily A member 1 [OS=Homo sapiens]	16.4033	3.1581	0.000702703	0.00140541	0.00351351	Enriched	Enriched	Enriched
O60869-1	Endothelial differentiation-related factor 1 [OS=Homo sapiens]	5.47299	1.91713	0.000756757	0.00151351	0.00378378	Enriched	Enriched	Enriched
P0DMV8	heat shock 70 kDa protein 1A [OS=Homo sapiens]	1201.74	2.27417	0.000810811	0.00162162	0.00405405	Enriched	Enriched	Enriched
P13861	cAMP-dependent protein kinase type II-alpha regulatory subunit [OS=Homo sapiens]	8.14131	1.92685	0.000864865	0.00172973	0.00432432	Enriched	Enriched	Enriched
P35268	60S ribosomal protein L22 [OS=Homo sapiens]	5.82511	2.58821	0.000918919	0.00183784	0.00459459	Enriched	Enriched	Enriched
P04083	annexin A1 [OS=Homo sapiens]	5.58227	2.69732	0.000972973	0.00194595	0.00486486	Enriched	Enriched	Enriched
P35580-4	Isoform 4 of Myosin-10 [OS=Homo sapiens]	16.2163	5.34279	0.00102703	0.00205405	0.00513514	Enriched	Enriched	Enriched
Q08752	peptidyl-prolyl cis-trans isomerase D [OS=Homo sapiens]	6.15779	2.29134	0.00108108	0.00216216	0.00540541	Enriched	Enriched	Enriched
P50479-1	PDZ and LIM domain protein 4 [OS=Homo sapiens]	3.30018	1.79124	0.00113514	0.00227027	0.00567568	Enriched	Enriched	Enriched
P56181-2	Isoform 2 of NADH dehydrogenase [ubiquinone] flavoprotein 3, mitochondrial [OS=Homo sapiens]	1.58981	1.30856	0.00118919	0.00237838	0.00594595	Enriched	Enriched	Enriched
Q00610-1	Clathrin heavy chain 1 [OS=Homo sapiens]	2.21861	1.5859	0.00124324	0.00248649	0.00621622	Enriched	Enriched	Enriched
P06899	Histone H2B type 1-J [OS=Homo sapiens]	8.3281	2.4052	0.0012973	0.00259459	0.00648649	Enriched	Enriched	Enriched
P13639	Elongation factor 2 [OS=Homo sapiens]	4.73895	2.18297	0.00135135	0.0027027	0.00675676	Enriched	Enriched	Enriched
O75369-1	Filamin-B [OS=Homo sapiens]	3.58408	1.92551	0.00140541	0.00281081	0.00702703	Enriched	Enriched	Enriched
O14979-1	Heterogeneous nuclear ribonucleoprotein D-like [OS=Homo sapiens]	7.69076	4.29367	0.00145946	0.00291892	0.0072973	Enriched	Enriched	Enriched
P46782	40S ribosomal protein S5 [OS=Homo sapiens]	3.36871	2.2182	0.00151351	0.00302703	0.00756757	Enriched	Enriched	Enriched
Q13085-4	Isoform 4 of Acetyl-CoA carboxylase 1 [OS=Homo sapiens]	21.8514	2.60403	0.00156757	0.00313514	0.00783784	Enriched	Enriched	Enriched
P04406-1	glyceraldehyde-3-phosphate dehydrogenase [OS=Homo sapiens]	5.17921	1.78206	0.00162162	0.00324324	0.00810811	Enriched	Enriched	Enriched
P42167	Lamina-associated polypeptide 2, isoforms beta/gamma [OS=Homo sapiens]	4.62202	1.81567	0.00167568	0.00335135	0.00837838	Enriched	Enriched	Enriched
P14923	Junction plakoglobin [OS=Homo sapiens]	3.4628	2.60069	0.00172973	0.00345946	0.00864865	Enriched	Enriched	Enriched
Q5QNW6-2	Isoform 2 of Histone H2B type 2-F [OS=Homo sapiens]	6.06641	1.94892	0.00178378	0.00356757	0.00891892	Enriched	Enriched	Enriched
Q9UHD1	cysteine and histidine-rich domain-containing protein 1 [OS=Homo sapiens]	20.3548	2.79196	0.00183784	0.00367568	0.00918919	Enriched	Enriched	Enriched
Q9Y265	RuvB-like 1 [OS=Homo sapiens]	6.86255	2.13078	0.00189189	0.00378378	0.00945946	Enriched	Enriched	Enriched
Q9Y2Q9	28S ribosomal protein S28, mitochondrial [OS=Homo sapiens]	5.83801	2.62774	0.00194595	0.00389189	0.00972973	Enriched	Enriched	Enriched
P08962	CD63 antigen [OS=Homo sapiens]	3.47272	1.85213	0.002	0.004	0.01	Enriched	Enriched	Enriched
P29692-2	Isoform 2 of Elongation factor 1-delta [OS=Homo sapiens]	3.55406	1.97178	0.00205405	0.00410811	0.0102703	Enriched	Enriched	Enriched
Q92572	AP-3 complex subunit sigma-1 [OS=Homo sapiens]	19.3227	2.7516	0.00210811	0.00421622	0.0105405	Enriched	Enriched	Enriched
P31948-2	Isoform 2 of Stress-induced-phosphoprotein 1 [OS=Homo sapiens]	25.4931	2.19454	0.00216216	0.00432432	0.0108108	Enriched	Enriched	Enriched
O00193	Small acidic protein [OS=Homo sapiens]	2.98037	1.59921	0.00221622	0.00443243	0.0110811	Enriched	Enriched	Enriched
Q15365	Poly(RC)-binding protein 1 [OS=Homo sapiens]	8.27735	2.47497	0.00227027	0.00454054	0.0113514	Enriched	Enriched	Enriched
P40939	Trifunctional enzyme subunit alpha, mitochondrial [OS=Homo sapiens]	14.003	4.43047	0.00232432	0.00464865	0.0116216	Enriched	Enriched	Enriched
P04075-2	Isoform 2 of Fructose-bisphosphate aldolase A [OS=Homo sapiens]	3.75449	1.74607	0.00237838	0.00475676	0.0118919	Enriched	Enriched	Enriched
Q15637-5	Isoform 5 of Splicing factor 1 [OS=Homo sapiens]	7.12738	1.96355	0.00243243	0.00486486	0.0121622	Enriched	Enriched	Enriched
Q9Y2Z0-1	Protein SGT1 homolog [OS=Homo sapiens]	13.7105	2.20987	0.00248649	0.00497297	0.0124324	Enriched	Enriched	Enriched
P85037-1	Forkhead box protein K1 [OS=Homo sapiens]	5.84181	1.92501	0.00254054	0.00508108	0.0127027	Enriched	Enriched	Enriched
P00338-3	Isoform 3 of L-lactate dehydrogenase A chain [OS=Homo sapiens]	6.45052	2.68636	0.00259459	0.00518919	0.012973	Enriched	Enriched	Enriched
O94776	Metastasis-associated protein MTA2 [OS=Homo sapiens]	7.54046	3.6898	0.00264865	0.0052973	0.0132432	Enriched	Enriched	Enriched
Q9NQC3	Reticulon-4 [OS=Homo sapiens]	3.18325	1.71976	0.0027027	0.00540541	0.0135135	Enriched	Enriched	Enriched
Q15286	Ras-related protein Rab-35 [OS=Homo sapiens]	23.1123	8.17569	0.00275676	0.00551351	0.0137838	Enriched	Enriched	Enriched
P32119	Peroxiredoxin-2 [OS=Homo sapiens]	2.35077	1.60316	0.00281081	0.00562162	0.0140541	Enriched	Enriched	Enriched
Q7Z6Z7	E3 ubiquitin-protein ligase HUWE1 [OS=Homo sapiens]	13.3192	6.50563	0.00286486	0.00572973	0.0143243	Enriched	Enriched	Enriched
P05165-1	Propionyl-CoA carboxylase alpha chain, mitochondrial [OS=Homo sapiens]	63.7377	2.39318	0.00291892	0.00583784	0.0145946	Enriched	Enriched	Enriched
Q01469	Fatty acid-binding protein, epidermal [OS=Homo sapiens]	5.67639	2.95385	0.00297297	0.00594595	0.0148649	Enriched	Enriched	Enriched
P11413-2	Isoform Long of Glucose-6-phosphate 1-dehydrogenase [OS=Homo sapiens]	6.45452	2.10713	0.00302703	0.00605405	0.0151351	Enriched	Enriched	Enriched
P11940-1	Polyadenylate-binding protein 1 [OS=Homo sapiens]	18.5052	2.24628	0.00308108	0.00616216	0.0154054	Enriched	Enriched	Enriched
O43660-1	Pleiotropic regulator 1 [OS=Homo sapiens]	8.83223	2.0346	0.00313514	0.00627027	0.0156757	Enriched	Enriched	Enriched
Q9UHD8-1	Septin-9 [OS=Homo sapiens]	3.36015	1.87861	0.00318919	0.00637838	0.0159459	Enriched	Enriched	Enriched
P48643	T-complex protein 1 subunit epsilon [OS=Homo sapiens]	6.45674	2.15938	0.00324324	0.00648649	0.0162162	Enriched	Enriched	Enriched
Q99439	Calponin-2 [OS=Homo sapiens]	7.29082	1.96758	0.0032973	0.00659459	0.0164865	Enriched	Enriched	Enriched
Q9UNE7-1	E3 ubiquitin-protein ligase CHIP [OS=Homo sapiens]	47.7042	2.27621	0.00335135	0.0067027	0.0167568	Enriched	Enriched	Enriched
O95372	acyl-protein thioesterase 2 [OS=Homo sapiens]	6.78963	3.01056	0.00340541	0.00681081	0.017027	Enriched	Enriched	Enriched
P60174	Triosephosphate isomerase [OS=Homo sapiens]	4.80305	1.80386	0.00345946	0.00691892	0.0172973	Enriched	Enriched	Enriched
P46776	60S ribosomal protein L27a [OS=Homo sapiens]	2.28811	1.55302	0.00351351	0.00702703	0.0175676	Enriched	Enriched	Enriched
Q05209-1	Tyrosine-protein phosphatase non-receptor type 12 [OS=Homo sapiens]	2.11264	1.51585	0.00356757	0.00713514	0.0178378	Enriched	Enriched	Enriched
Q13148-1	TAR DNA-binding protein 43 [OS=Homo sapiens]	6.3844	1.65338	0.00362162	0.00724324	0.0181081	Enriched	Enriched	Enriched
P37802-2	Isoform 2 of Transgelin-2 [OS=Homo sapiens]	6.56797	1.80854	0.00367568	0.00735135	0.0183784	Enriched	Enriched	Enriched
P46063	ATP-dependent DNA helicase Q1 [OS=Homo sapiens]	9.9959	2.87516	0.00372973	0.00745946	0.0186486	Enriched	Enriched	Enriched
O14639-1	Actin-binding LIM protein 1 [OS=Homo sapiens]	3.96441	2.08676	0.00378378	0.00756757	0.0189189	Enriched	Enriched	Enriched
Q14315	Filamin-C [OS=Homo sapiens]	3.07287	1.78857	0.00383784	0.00767568	0.0191892	Enriched	Enriched	Enriched
Q15029	116 kDa U5 small nuclear ribonucleoprotein component [OS=Homo sapiens]	11.6264	3.2561	0.00389189	0.00778378	0.0194595	Enriched	Enriched	Enriched
P06733-1	alpha-enolase [OS=Homo sapiens]	4.36909	2.11416	0.00394595	0.00789189	0.0197297	Enriched	Enriched	Enriched
P61956	small ubiquitin-related modifier 2 [OS=Homo sapiens]	2.55417	1.84663	0.004	0.008	0.02	Enriched	Enriched	Enriched
Q99733-2	Isoform 2 of Nucleosome assembly protein 1-like 4 [OS=Homo sapiens]	5.91465	2.70841	0.00405405	0.00810811	0.0202703	Enriched	Enriched	Enriched
Q15417	Calponin-3 [OS=Homo sapiens]	4.04362	2.10619	0.00410811	0.00821622	0.0205405	Enriched	Enriched	Enriched
Q02790	Peptidyl-prolyl cis-trans isomerase FKBP4 [OS=Homo sapiens]	3.01875	1.60544	0.00416216	0.00832432	0.0208108	Enriched	Enriched	Enriched
Q8WXX5	dnaJ homolog subfamily C member 9 [OS=Homo sapiens]	4.07199	1.88081	0.00421622	0.00843243	0.0210811	Enriched	Enriched	Enriched
P42166	Lamina-associated polypeptide 2, isoform alpha [OS=Homo sapiens]	5.27153	2.06234	0.00427027	0.00854054	0.0213514	Enriched	Enriched	Enriched
Q07157	Tight junction protein ZO-1 [OS=Homo sapiens]	4.11082	2.15293	0.00432432	0.00864865	0.0216216	Enriched	Enriched	Enriched
O43143	Pre-mRNA-splicing factor ATP-dependent RNA helicase DHX15 [OS=Homo sapiens]	10.4338	2.64105	0.00437838	0.00875676	0.0218919	Enriched	Enriched	Enriched
Q9NRV9	Heme-binding protein 1 [OS=Homo sapiens]	5.40671	2.03932	0.00443243	0.00886486	0.0221622	Enriched	Enriched	Enriched
Q96C19	EF-hand domain-containing protein D2 [OS=Homo sapiens]	8.70641	2.06381	0.00448649	0.00897297	0.0224324	Enriched	Enriched	Enriched
P62826	GTP-binding nuclear protein RAN [OS=Homo sapiens]	3.70366	1.92399	0.00454054	0.00908108	0.0227027	Enriched	Enriched	Enriched
Q9Y3B4	Splicing factor 3B subunit 6 [OS=Homo sapiens]	5.48364	2.08904	0.00459459	0.00918919	0.022973	Enriched	Enriched	Enriched
Q9HCN4-5	Isoform 5 of GPN-loop GTPase 1 [OS=Homo sapiens]	3.9964	1.61151	0.00464865	0.0092973	0.0232432	Enriched	Enriched	Enriched
Q13464	Rho-associated protein kinase 1 [OS=Homo sapiens]	2.36194	1.71336	0.0047027	0.00940541	0.0235135	Enriched	Enriched	Enriched
Q92598	Heat shock protein 105 kDa [OS=Homo sapiens]	8.53432	1.82427	0.00475676	0.00951351	0.0237838	Enriched	Enriched	Enriched
Q13442	28 kDa heat- and acid-stable phosphoprotein [OS=Homo sapiens]	5.91873	2.39324	0.00481081	0.00962162	0.0240541	Enriched	Enriched	Enriched
P46821	microtubule-associated protein 1B [OS=Homo sapiens]	791.604	6.28314	0.00486486	0.00972973	0.0243243	Enriched	Enriched	Enriched
Q9H0C8	Integrin-linked kinase-associated serine/threonine phosphatase 2C [OS=Homo sapiens]	7.54701	1.91769	0.00491892	0.00983784	0.0245946	Enriched	Enriched	Enriched
Q13200	26S proteasome non-ATPase regulatory subunit 2 [OS=Homo sapiens]	6.58179	4.06926	0.00497297	0.00994595	0.0248649	Enriched	Enriched	Enriched
Q99747	Gamma-soluble NSF attachment protein [OS=Homo sapiens]	5.42669	2.18228	0.00502703	0.0100541	0.0251351	Enriched	Enriched	Enriched
Q9UNF1	Melanoma-associated antigen D2 [OS=Homo sapiens]	8.00222	2.39866	0.00508108	0.0101622	0.0254054	Enriched	Enriched	Enriched
P15170-3	Isoform 3 of Eukaryotic peptide chain release factor GTP-binding subunit ERF3A [OS=Homo sapiens]	18.451	4.65127	0.00513514	0.0102703	0.0256757	Enriched	Enriched	Enriched
P11498	pyruvate carboxylase, mitochondrial [OS=Homo sapiens]	5.08609	1.98742	0.00518919	0.0103784	0.0259459	Enriched	Enriched	Enriched
Q99615-1	DnaJ homolog subfamily C member 7 [OS=Homo sapiens]	2.80708	1.88559	0.00524324	0.0104865	0.0262162	Enriched	Enriched	Enriched
P01876	Ig alpha-1 chain C region [OS=Homo sapiens]	12.9266	4.00137	0.0052973	0.0105946	0.0264865	Enriched	Enriched	Enriched
Q13283	Ras GTPase-activating protein-binding protein 1 [OS=Homo sapiens]	4.02622	2.00448	0.00535135	0.0107027	0.0267568	Enriched	Enriched	Enriched
Q7Z434	Mitochondrial antiviral-signaling protein [OS=Homo sapiens]	10.125	2.06137	0.00540541	0.0108108	0.027027	Enriched	Enriched	Enriched
Q15019-2	Isoform 2 of Septin-2 [OS=Homo sapiens]	8.96793	3.03709	0.00545946	0.0109189	0.0272973	Enriched	Enriched	Enriched
Q15785	Mitochondrial import receptor subunit TOM34 [OS=Homo sapiens]	287.427	2.33585	0.00551351	0.011027	0.0275676	Enriched	Enriched	Enriched
Q16881-1	Thioredoxin reductase 1, cytoplasmic [OS=Homo sapiens]	2.38993	1.51365	0.00556757	0.0111351	0.0278378	Enriched	Enriched	Enriched
P53990-5	Isoform 5 of IST1 homolog [OS=Homo sapiens]	8.84608	2.90972	0.00562162	0.0112432	0.0281081	Enriched	Enriched	Enriched
P78318	Immunoglobulin-binding protein 1 [OS=Homo sapiens]	5.20079	2.79896	0.00567568	0.0113514	0.0283784	Enriched	Enriched	Enriched
Q9H444	Charged multivesicular body protein 4b [OS=Homo sapiens]	6.5562	2.09401	0.00572973	0.0114595	0.0286486	Enriched	Enriched	Enriched
P07900-2	Isoform 2 of Heat shock protein HSP 90-alpha [OS=Homo sapiens]	11.1569	2.38832	0.00578378	0.0115676	0.0289189	Enriched	Enriched	Enriched
O00159-1	Unconventional myosin-Ic [OS=Homo sapiens]	48.3527	3.26832	0.00583784	0.0116757	0.0291892	Enriched	Enriched	Enriched
Q14192	Four and a half LIM domains protein 2 [OS=Homo sapiens]	2.94373	1.62047	0.00589189	0.0117838	0.0294595	Enriched	Enriched	Enriched
P30050-1	60S ribosomal protein L12 [OS=Homo sapiens]	14.2963	3.33105	0.00594595	0.0118919	0.0297297	Enriched	Enriched	Enriched
P52943-2	Isoform 2 of Cysteine-rich protein 2 [OS=Homo sapiens]	7.8576	2.14928	0.006	0.012	0.03	Enriched	Enriched	Enriched
P27816-1	Microtubule-associated protein 4 [OS=Homo sapiens]	2.0467	1.51813	0.00605405	0.0121081	0.0302703	Enriched	Enriched	Enriched
P31944	Caspase-14 [OS=Homo sapiens]	2.99119	1.81551	0.00610811	0.0122162	0.0305405	Enriched	Enriched	Enriched
Q15434	RNA-binding motif, single-stranded-interacting protein 2 [OS=Homo sapiens]	2.89689	1.80883	0.00616216	0.0123243	0.0308108	Enriched	Enriched	Enriched
Q13185	chromobox protein homolog 3 [OS=Homo sapiens]	4.11543	1.79865	0.00621622	0.0124324	0.0310811	Enriched	Enriched	Enriched
P08133-1	annexin A6 [OS=Homo sapiens]	9.29457	2.18745	0.00627027	0.0125405	0.0313514	Enriched	Enriched	Enriched
Q9H910-3	Isoform 3 of Hematological and neurological expressed 1-like protein [OS=Homo sapiens]	3.15584	1.6747	0.00632432	0.0126486	0.0316216	Enriched	Enriched	Enriched
Q8WW12	PEST proteolytic signal-containing nuclear protein [OS=Homo sapiens]	2.70911	1.54978	0.00637838	0.0127568	0.0318919	Enriched	Enriched	Enriched
Q15366-3	Isoform 3 of Poly(rC)-binding protein 2 [OS=Homo sapiens]	12.0066	2.27445	0.00643243	0.0128649	0.0321622	Enriched	Enriched	Enriched
O14641	Segment polarity protein dishevelled homolog DVL-2 [OS=Homo sapiens]	25.1636	2.56701	0.00648649	0.012973	0.0324324	Enriched	Enriched	Enriched
Q8IYB5-2	Isoform 2 of Stromal membrane-associated protein 1 [OS=Homo sapiens]	8.03076	1.96473	0.00654054	0.0130811	0.0327027	Enriched	Enriched	Enriched
P08670	Vimentin [OS=Homo sapiens]	4.21935	2.53031	0.00659459	0.0131892	0.032973	Enriched	Enriched	Enriched
Q9H3N1	Thioredoxin-related transmembrane protein 1 [OS=Homo sapiens]	12.8794	2.22783	0.00664865	0.0132973	0.0332432	Enriched	Enriched	Enriched
O95793	double-stranded RNA-binding protein Staufen homolog 1 [OS=Homo sapiens]	7.92469	3.05718	0.0067027	0.0134054	0.0335135	Enriched	Enriched	Enriched
Q9NUL3	Double-stranded RNA-binding protein Staufen homolog 2 [OS=Homo sapiens]	3.7447	1.74751	0.00675676	0.0135135	0.0337838	Enriched	Enriched	Enriched
Q9NWV4	UPF0587 protein C1orf123 [OS=Homo sapiens]	8.7937	2.0961	0.00681081	0.0136216	0.0340541	Enriched	Enriched	Enriched
Q9Y230	RuvB-like 2 [OS=Homo sapiens]	7.08954	2.24739	0.00686486	0.0137297	0.0343243	Enriched	Enriched	Enriched
P61204	ADP-ribosylation factor 3 [OS=Homo sapiens]	4.72664	3.42323	0.00691892	0.0138378	0.0345946	Enriched	Enriched	Enriched
P18669	Phosphoglycerate mutase 1 [OS=Homo sapiens]	3.99682	1.66849	0.00697297	0.0139459	0.0348649	Enriched	Enriched	Enriched
Q9UHB6-4	Isoform 4 of LIM domain and actin-binding protein 1 [OS=Homo sapiens]	2.98405	1.86352	0.00702703	0.0140541	0.0351351	Enriched	Enriched	Enriched
O00571	ATP-dependent RNA helicase DDX3X [OS=Homo sapiens]	4.29463	1.93893	0.00708108	0.0141622	0.0354054	Enriched	Enriched	Enriched
P25685	dnaJ homolog subfamily B member 1 [OS=Homo sapiens]	34.4181	2.47157	0.00713514	0.0142703	0.0356757	Enriched	Enriched	Enriched
P50502	Hsc70-interacting protein [OS=Homo sapiens]	74.4214	2.05033	0.00718919	0.0143784	0.0359459	Enriched	Enriched	Enriched
Q14847-2	Isoform 2 of LIM and SH3 domain protein 1 [OS=Homo sapiens]	1.50802	1.26405	0.00724324	0.0144865	0.0362162	Enriched	Enriched	Enriched
P05783	Keratin, type I cytoskeletal 18 [OS=Homo sapiens]	4.73119	1.821	0.0072973	0.0145946	0.0364865	Enriched	Enriched	Enriched
Q13642-4	Isoform 4 of Four and a half LIM domains protein 1 [OS=Homo sapiens]	3.42424	1.59933	0.00735135	0.0147027	0.0367568	Enriched	Enriched	Enriched
P22234	multifunctional protein ADE2 [OS=Homo sapiens]	5.24195	2.46278	0.00740541	0.0148108	0.037027	Enriched	Enriched	Enriched
Q99426	tubulin-folding cofactor B [OS=Homo sapiens]	2.73921	1.58975	0.00745946	0.0149189	0.0372973	Enriched	Enriched	Enriched
O60664-1	Perilipin-3 [OS=Homo sapiens]	8.23535	2.11051	0.00751351	0.015027	0.0375676	Enriched	Enriched	Enriched
P23528	Cofilin-1 [OS=Homo sapiens]	4.84627	2.81587	0.00756757	0.0151351	0.0378378	Enriched	Enriched	Enriched
P51610-4	Isoform 4 of Host cell factor 1 [OS=Homo sapiens]	3.77046	1.89791	0.00762162	0.0152432	0.0381081	Enriched	Enriched	Enriched
P05023	Sodium/potassium-transporting ATPase subunit alpha-1 [OS=Homo sapiens]	4.61548	1.73773	0.00767568	0.0153514	0.0383784	Enriched	Enriched	Enriched
Q8WVM8	Sec1 family domain-containing protein 1 [OS=Homo sapiens]	236.913	13.4274	0.00772973	0.0154595	0.0386486	Enriched	Enriched	Enriched
P08238	Heat shock protein HSP 90-beta [OS=Homo sapiens]	29.926	2.35068	0.00778378	0.0155676	0.0389189	Enriched	Enriched	Enriched
P40926	Malate dehydrogenase, mitochondrial [OS=Homo sapiens]	8.78371	2.41045	0.00783784	0.0156757	0.0391892	Enriched	Enriched	Enriched
Q01105-2	Isoform 2 of Protein SET [OS=Homo sapiens]	2.93619	1.69082	0.00789189	0.0157838	0.0394595	Enriched	Enriched	Enriched
Q9UKX7	Nuclear pore complex protein Nup50 [OS=Homo sapiens]	2.77125	1.61489	0.00794595	0.0158919	0.0397297	Enriched	Enriched	Enriched
Q96RT1-8	Isoform 8 of Protein LAP2 [OS=Homo sapiens]	3.29899	1.7266	0.008	0.016	0.04	Enriched	Enriched	Enriched
Q8TBE9	N-acylneuraminate-9-phosphatase [OS=Homo sapiens]	7.82605	2.10704	0.00805405	0.0161081	0.0402703	Enriched	Enriched	Enriched
E9PAV3	Nascent polypeptide-associated complex subunit alpha, muscle-specific form [OS=Homo sapiens]	15.4367	2.46169	0.00810811	0.0162162	0.0405405	Enriched	Enriched	Enriched
Q96LB3-1	Intraflagellar transport protein 74 homolog [OS=Homo sapiens]	10.2811	2.83975	0.00816216	0.0163243	0.0408108	Enriched	Enriched	Enriched
P07355-2	Isoform 2 of Annexin A2 [OS=Homo sapiens]	4.22309	1.82754	0.00821622	0.0164324	0.0410811	Enriched	Enriched	Enriched
P30086	phosphatidylethanolamine-binding protein 1 [OS=Homo sapiens]	9.12638	2.08457	0.00827027	0.0165405	0.0413514	Enriched	Enriched	Enriched
P30520	adenylosuccinate synthetase isozyme 2 [OS=Homo sapiens]	1.39928	1.20062	0.00832432	0.0166486	0.0416216	Enriched	Enriched	Enriched
P34932	Heat shock 70 kDa protein 4 [OS=Homo sapiens]	9.58549	5.56739	0.00837838	0.0167568	0.0418919	Enriched	Enriched	Enriched
P32969	60S ribosomal protein L9 [OS=Homo sapiens]	26.3395	3.81294	0.00843243	0.0168649	0.0421622	Enriched	Enriched	Enriched
P11142-1	Heat shock cognate 71 kDa protein [OS=Homo sapiens]	5.09644	1.88332	0.00848649	0.016973	0.0424324	Enriched	Enriched	Enriched
P49321-3	Isoform 3 of Nuclear autoantigenic sperm protein [OS=Homo sapiens]	3.68483	2.02731	0.00854054	0.0170811	0.0427027	Enriched	Enriched	Enriched
Q9Y266	nuclear migration protein nudC [OS=Homo sapiens]	20.7755	5.06677	0.00859459	0.0171892	0.042973	Enriched	Enriched	Enriched
P50402	Emerin [OS=Homo sapiens]	7.705	1.85768	0.00864865	0.0172973	0.0432432	Enriched	Enriched	Enriched
P21333	Filamin-A [OS=Homo sapiens]	3.12286	1.85289	0.0087027	0.0174054	0.0435135	Enriched	Enriched	Enriched
Q8IVT2	Mitotic interactor and substrate of PLK1 [OS=Homo sapiens]	2.9721	1.85788	0.00875676	0.0175135	0.0437838	Enriched	Enriched	Enriched
Q15369-1	Transcription elongation factor B polypeptide 1 [OS=Homo sapiens]	492.314	4.46015	0.00881081	0.0176216	0.0440541	Enriched	Enriched	Enriched
P63241-2	Isoform 2 of Eukaryotic translation initiation factor 5A-1 [OS=Homo sapiens]	4.54691	1.96434	0.00886486	0.0177297	0.0443243	Enriched	Enriched	Enriched
Q9Y3B8-1	Oligoribonuclease, mitochondrial [OS=Homo sapiens]	6.53171	2.81429	0.00891892	0.0178378	0.0445946	Enriched	Enriched	Enriched
Q01995	transgelin [OS=Homo sapiens]	10.1817	6.83143	0.00897297	0.0179459	0.0448649	Enriched	Enriched	Enriched
P02452	Collagen alpha-1(I) chain [OS=Homo sapiens]	4.2269	2.29912	0.00902703	0.0180541	0.0451351	Enriched	Enriched	Enriched
P30041	Peroxiredoxin-6 [OS=Homo sapiens]	13.3958	2.08688	0.00908108	0.0181622	0.0454054	Enriched	Enriched	Enriched
O75533-1	splicing factor 3B subunit 1 [OS=Homo sapiens]	3.14895	2.23378	0.00913514	0.0182703	0.0456757	Enriched	Enriched	Enriched
Q9NX40	OCIA domain-containing protein 1 [OS=Homo sapiens]	15.2928	4.3982	0.00918919	0.0183784	0.0459459	Enriched	Enriched	Enriched
Q9Y696	Chloride intracellular channel protein 4 [OS=Homo sapiens]	4.24492	1.89686	0.00924324	0.0184865	0.0462162	Enriched	Enriched	Enriched
P27635	60S ribosomal protein L10 [OS=Homo sapiens]	2.23809	1.5826	0.0092973	0.0185946	0.0464865	Enriched	Enriched	Enriched
BIOID	OS=Engineered GN=BIOID PE=1 SV=1	2.58887	1.53771	0.00935135	0.0187027	0.0467568	Enriched	Enriched	Enriched
P00761	Trypsin OS=Sus scrofa PE=1 SV=1	1	1	0.00940541	0.0188108	0.047027	Enriched	Enriched	Enriched
O96019-1	Actin-like protein 6A [OS=Homo sapiens]	2.17058	1.61361	0.00945946	0.0189189	0.0472973	Enriched	Enriched	Enriched
P46777	60S ribosomal protein L5 [OS=Homo sapiens]	2.64407	1.80115	0.00951351	0.019027	0.0475676	Enriched	Enriched	Enriched
P23588	eukaryotic translation initiation factor 4B [OS=Homo sapiens]	2.22279	1.59306	0.00956757	0.0191351	0.0478378	Enriched	Enriched	Enriched
P35232	Prohibitin [OS=Homo sapiens]	6.31377	3.97582	0.00962162	0.0192432	0.0481081	Enriched	Enriched	Enriched
P04899-4	Isoform sGi2 of Guanine nucleotide-binding protein G(i) subunit alpha-2 [OS=Homo sapiens]	18.0259	8.31268	0.00967568	0.0193514	0.0483784	Enriched	Enriched	Enriched
Q9GZN8-2	Isoform 2 of UPF0687 protein C20orf27 [OS=Homo sapiens]	4.92764	3.07706	0.00972973	0.0194595	0.0486486	Enriched	Enriched	Enriched
P12956	X-ray repair cross-complementing protein 6 [OS=Homo sapiens]	3.95604	2.24437	0.00978378	0.0195676	0.0489189	Enriched	Enriched	Enriched
Q13162	Peroxiredoxin-4 [OS=Homo sapiens]	4.82655	3.59536	0.00983784	0.0196757	0.0491892	Enriched	Enriched	Enriched
O75152	Zinc finger CCCH domain-containing protein 11A [OS=Homo sapiens]	2.93155	1.87311	0.00989189	0.0197838	0.0494595	Enriched	Enriched	Enriched
Q7KZF4	staphylococcal nuclease domain-containing protein 1 [OS=Homo sapiens]	19.9376	4.3308	0.00994595	0.0198919	0.0497297	Enriched	Enriched	Enriched
Q06323-1	Proteasome activator complex subunit 1 [OS=Homo sapiens]	6.02816	2.80614	0.01	0.02	0.05	Enriched	Enriched	Enriched
Q15233	Non-POU domain-containing octamer-binding protein [OS=Homo sapiens]	2.76484	1.59676	0.0100541	0.0201081	0.0502703	Enriched	Enriched	Enriched
Q96IZ0	PRKC apoptosis WT1 regulator protein [OS=Homo sapiens]	4.59638	3.13032	0.0101081	0.0202162	0.0505405	Enriched	Enriched	Enriched
Q13435	Splicing factor 3b subunit 2 [OS=Homo sapiens]	5.86669	2.58686	0.0101622	0.0203243	0.0508108	Enriched	Enriched	Enriched
Q9H3S7	Tyrosine-protein phosphatase non-receptor type 23 [OS=Homo sapiens]	4.388	2.29403	0.0102162	0.0204324	0.0510811	Enriched	Enriched	Enriched
Q15056-1	Eukaryotic translation initiation factor 4H [OS=Homo sapiens]	2.74094	2.05793	0.0102703	0.0205405	0.0513514	Enriched	Enriched	Enriched
P38646	Stress-70 protein, mitochondrial [OS=Homo sapiens]	15.0879	5.88851	0.0103243	0.0206486	0.0516216	Enriched	Enriched	Enriched
P84157-2	Isoform 2 of Matrix-remodeling-associated protein 7 [OS=Homo sapiens]	2.60902	1.79527	0.0103784	0.0207568	0.0518919	Enriched	Enriched	Enriched
Q99613	Eukaryotic translation initiation factor 3 subunit C [OS=Homo sapiens]	3.39068	1.93741	0.0104324	0.0208649	0.0521622	Enriched	Enriched	Enriched
P55145	Mesencephalic astrocyte-derived neurotrophic factor [OS=Homo sapiens]	19.0849	5.47192	0.0104865	0.020973	0.0524324	Enriched	Enriched	Enriched
P33176	Kinesin-1 heavy chain [OS=Homo sapiens]	3.31998	2.24177	0.0105405	0.0210811	0.0527027	Enriched	Enriched	Enriched
O75874	Isocitrate dehydrogenase [NADP] cytoplasmic [OS=Homo sapiens]	4.05356	2.32024	0.0105946	0.0211892	0.052973	Enriched	Enriched	Enriched
Q13126-1	S-methyl-5'-thioadenosine phosphorylase [OS=Homo sapiens]	3.4457	2.26046	0.0106486	0.0212973	0.0532432	Enriched	Enriched	Enriched
Q7Z2W4	zinc finger CCCH-type antiviral protein 1 [OS=Homo sapiens]	2.65724	1.68725	0.0107027	0.0214054	0.0535135	Enriched	Enriched	Enriched
P55327-3	Isoform 3 of Tumor protein D52 [OS=Homo sapiens]	8.37852	3.30296	0.0107568	0.0215135	0.0537838	Enriched	Enriched	Enriched
Q96S66	chloride channel CLIC-like protein 1 [OS=Homo sapiens]	6.41	2.58652	0.0108108	0.0216216	0.0540541	Enriched	Enriched	Enriched
Q9UKV3-1	Apoptotic chromatin condensation inducer in the nucleus [OS=Homo sapiens]	4.38234	2.05336	0.0108649	0.0217297	0.0543243	Enriched	Enriched	Enriched
P60228	Eukaryotic translation initiation factor 3 subunit E [OS=Homo sapiens]	3.76577	2.01637	0.0109189	0.0218378	0.0545946	Enriched	Enriched	Enriched
P31153	S-adenosylmethionine synthase isoform type-2 [OS=Homo sapiens]	29.6145	4.02822	0.010973	0.0219459	0.0548649	Enriched	Enriched	Enriched
Q92997	segment polarity protein dishevelled homolog DVL-3 [OS=Homo sapiens]	11.3346	3.17692	0.011027	0.0220541	0.0551351	Enriched	Enriched	Enriched
P42704	Leucine-rich PPR motif-containing protein, mitochondrial [OS=Homo sapiens]	3.06876	2.08034	0.0110811	0.0221622	0.0554054	Enriched	Enriched	Enriched
Q9ULD2-1	Microtubule-associated tumor suppressor 1 [OS=Homo sapiens]	2.60405	1.73457	0.0111351	0.0222703	0.0556757	Enriched	Enriched	Enriched
Q8TEQ6	gem-associated protein 5 [OS=Homo sapiens]	4.25609	2.25518	0.0111892	0.0223784	0.0559459	Enriched	Enriched	Enriched
Q9P2B4	CTTNBP2 N-terminal-like protein [OS=Homo sapiens]	4.30742	2.54292	0.0112432	0.0224865	0.0562162	Enriched	Enriched	Enriched
P62829	60S ribosomal protein L23 [OS=Homo sapiens]	2.17345	1.55193	0.0112973	0.0225946	0.0564865	Enriched	Enriched	Enriched
Q6IBS0	Twinfilin-2 [OS=Homo sapiens]	9.95608	4.07082	0.0113514	0.0227027	0.0567568	Enriched	Enriched	Enriched
P11177	Pyruvate dehydrogenase E1 component subunit beta, mitochondrial [OS=Homo sapiens]	17.9914	5.45332	0.0114054	0.0228108	0.057027	Enriched	Enriched	Enriched
Q9ULV4-3	Isoform 3 of Coronin-1C [OS=Homo sapiens]	2.61916	1.82224	0.0114595	0.0229189	0.0572973	Enriched	Enriched	Enriched
Q92945	Far upstream element-binding protein 2 [OS=Homo sapiens]	4.26245	2.36628	0.0115135	0.023027	0.0575676	Enriched	Enriched	Enriched
P19838-2	Isoform 2 of Nuclear factor NF-kappa-B p105 subunit [OS=Homo sapiens]	2.5443	2.01341	0.0115676	0.0231351	0.0578378	Enriched	Enriched	Enriched
Q96I25	Splicing factor 45 [OS=Homo sapiens]	2.10758	1.47732	0.0116216	0.0232432	0.0581081	Enriched	Enriched	Enriched
Q8NFJ5	Retinoic acid-induced protein 3 [OS=Homo sapiens]	2.30873	1.97258	0.0116757	0.0233514	0.0583784	Enriched	Enriched	Enriched
P52907	F-actin-capping protein subunit alpha-1 [OS=Homo sapiens]	3.05947	1.90207	0.0117297	0.0234595	0.0586486	Enriched	Enriched	Enriched
P05455	Lupus La protein [OS=Homo sapiens]	3.01316	2.13242	0.0117838	0.0235676	0.0589189	Enriched	Enriched	Enriched
Q8N1F7-1	Nuclear pore complex protein Nup93 [OS=Homo sapiens]	1.34717	1.19482	0.0118378	0.0236757	0.0591892	Enriched	Enriched	Enriched
P06744-2	Isoform 2 of Glucose-6-phosphate isomerase [OS=Homo sapiens]	2.83477	2.1024	0.0118919	0.0237838	0.0594595	Enriched	Enriched	Enriched
Q9NRY5	Protein FAM114A2 [OS=Homo sapiens]	3.40219	2.10001	0.0119459	0.0238919	0.0597297	Enriched	Enriched	Enriched
Q5T750	Skin-specific protein 32 [OS=Homo sapiens]	3.57166	2.76324	0.012	0.024	0.06	Enriched	Enriched	Enriched
Q9P287-2	Isoform 2 of BRCA2 and CDKN1A-interacting protein [OS=Homo sapiens]	2.29946	1.73991	0.0120541	0.0241081	0.0602703	Enriched	Enriched	Enriched
Q8TF68-2	Isoform 2 of Zinc finger protein 384 [OS=Homo sapiens]	2.74368	1.68827	0.0121081	0.0242162	0.0605405	Enriched	Enriched	Enriched
Q9NVP1	ATP-dependent RNA helicase DDX18 [OS=Homo sapiens]	9.3184	3.58043	0.0121622	0.0243243	0.0608108	Enriched	Enriched	Enriched
Q14764	major vault protein [OS=Homo sapiens]	4.52399	3.02396	0.0122162	0.0244324	0.0610811	Enriched	Enriched	Enriched
P68104	Elongation factor 1-alpha 1 [OS=Homo sapiens]	2.20771	1.68711	0.0122703	0.0245405	0.0613514	Enriched	Enriched	Enriched
Q5T749	Keratinocyte proline-rich protein [OS=Homo sapiens]	2.87459	2.34377	0.0123243	0.0246486	0.0616216	Enriched	Enriched	Enriched
Q9Y3I0	tRNA-splicing ligase RtcB homolog [OS=Homo sapiens]	12.3671	3.64671	0.0123784	0.0247568	0.0618919	Enriched	Enriched	Enriched
O00221	NF-kappa-B inhibitor epsilon [OS=Homo sapiens]	2.40441	1.84007	0.0124324	0.0248649	0.0621622	Enriched	Enriched	Enriched
Q96HE7	ERO1-like protein alpha [OS=Homo sapiens]	4.35153	2.29481	0.0124865	0.024973	0.0624324	Enriched	Enriched	Enriched
Q8IVF2-1	Protein AHNAK2 [OS=Homo sapiens]	2.06247	1.60321	0.0125405	0.0250811	0.0627027	Enriched	Enriched	Enriched
Q14108-1	Lysosome membrane protein 2 [OS=Homo sapiens]	3.60358	2.67737	0.0125946	0.0251892	0.062973	Enriched	Enriched	Enriched
P23526-1	Adenosylhomocysteinase [OS=Homo sapiens]	2.9076	2.10832	0.0126486	0.0252973	0.0632432	Enriched	Enriched	Enriched
Q14684	Ribosomal RNA processing protein 1 homolog B [OS=Homo sapiens]	14.4793	6.49145	0.0127027	0.0254054	0.0635135	Enriched	Enriched	Enriched
Q13409-1	cytoplasmic dynein 1 intermediate chain 2 [OS=Homo sapiens]	2.3078	1.81687	0.0127568	0.0255135	0.0637838	Enriched	Enriched	Enriched
P37837	Transaldolase [OS=Homo sapiens]	42.8915	4.49856	0.0128108	0.0256216	0.0640541	Enriched	Enriched	Enriched
Q15654-1	thyroid receptor-interacting protein 6 [OS=Homo sapiens]	23.5044	7.2214	0.0128649	0.0257297	0.0643243	Enriched	Enriched	Enriched
P34931	Heat shock 70 kDa protein 1-like [OS=Homo sapiens]	22.4161	4.32382	0.0129189	0.0258378	0.0645946	Enriched	Enriched	Enriched
Q6P2Q9	Pre-mRNA-processing-splicing factor 8 [OS=Homo sapiens]	58.3943	38.753	0.012973	0.0259459	0.0648649	Enriched	Enriched	Enriched
Q12888-2	Isoform 2 of Tumor suppressor p53-binding protein 1 [OS=Homo sapiens]	2.50816	1.66483	0.013027	0.0260541	0.0651351	Enriched	Enriched	Enriched
Q6MZP7	Protein lin-54 homolog [OS=Homo sapiens]	5.16229	2.87965	0.0130811	0.0261622	0.0654054	Enriched	Enriched	Enriched
Q9UBQ0-2	Isoform 2 of Vacuolar protein sorting-associated protein 29 [OS=Homo sapiens]	6.21376	5.71719	0.0131351	0.0262703	0.0656757	Enriched	Enriched	Enriched
Q9UK76	Hematological and neurological expressed 1 protein [OS=Homo sapiens]	2.21924	1.73702	0.0131892	0.0263784	0.0659459	Enriched	Enriched	Enriched
Q9Y4P3	Transducin beta-like protein 2 [OS=Homo sapiens]	3.50242	2.01377	0.0132432	0.0264865	0.0662162	Enriched	Enriched	Enriched
P11279	Lysosome-associated membrane glycoprotein 1 [OS=Homo sapiens]	3.04612	1.96689	0.0132973	0.0265946	0.0664865	Enriched	Enriched	Enriched
Q8IYB3	Serine/arginine repetitive matrix protein 1 [OS=Homo sapiens]	6.40861	4.96603	0.0133514	0.0267027	0.0667568	Enriched	Enriched	Enriched
Q9H1E3	Nuclear ubiquitous casein and cyclin-dependent kinase substrate 1 [OS=Homo sapiens]	3.99346	2.24039	0.0134054	0.0268108	0.067027	Enriched	Enriched	Enriched
Q8IX90	Spindle and kinetochore-associated protein 3 [OS=Homo sapiens]	2.51458	1.85718	0.0134595	0.0269189	0.0672973	Enriched	Enriched	Enriched
P60842	Eukaryotic initiation factor 4A-I [OS=Homo sapiens]	3.61243	2.45111	0.0135135	0.027027	0.0675676	Enriched	Enriched	Enriched
P46060	Ran GTPase-activating protein 1 [OS=Homo sapiens]	4.83905	2.82087	0.0135676	0.0271351	0.0678378	Enriched	Enriched	Enriched
P25311	Zinc-alpha-2-glycoprotein [OS=Homo sapiens]	1.92195	1.57987	0.0136216	0.0272432	0.0681081	Enriched	Enriched	Enriched
Q9NTJ3-1	Structural maintenance of chromosomes protein 4 [OS=Homo sapiens]	3.0586	1.87738	0.0136757	0.0273514	0.0683784	Enriched	Enriched	Enriched
P40925-3	Isoform 3 of Malate dehydrogenase, cytoplasmic [OS=Homo sapiens]	4.76079	3.12712	0.0137297	0.0274595	0.0686486	Enriched	Enriched	Enriched
P43034	Platelet-activating factor acetylhydrolase IB subunit alpha [OS=Homo sapiens]	37.0988	5.77807	0.0137838	0.0275676	0.0689189	Enriched	Enriched	Enriched
O00232-1	26s proteasome non-atpase regulatory subunit 12 [OS=Homo sapiens]	4.51942	3.66697	0.0138378	0.0276757	0.0691892	Enriched	Enriched	Enriched
P22626	heterogeneous nuclear ribonucleoproteins A2/B1 [OS=Homo sapiens]	2.66489	1.67134	0.0138919	0.0277838	0.0694595	Enriched	Enriched	Enriched
O60216	Double-strand-break repair protein rad21 homolog [OS=Homo sapiens]	4.19568	2.87484	0.0139459	0.0278919	0.0697297	Enriched	Enriched	Enriched
P17812	CTP synthase 1 [OS=Homo sapiens]	2.09247	1.53141	0.014	0.028	0.07	Enriched	Enriched	Enriched
P20290-1	transcription factor BTF3 [OS=Homo sapiens]	2.32249	1.86665	0.0140541	0.0281081	0.0702703	Enriched	Enriched	Enriched
P09455-3	Isoform 3 of Retinol-binding protein 1 [OS=Homo sapiens]	1.99796	1.56343	0.0141081	0.0282162	0.0705405	Enriched	Enriched	Enriched
O43583	density-regulated protein [OS=Homo sapiens]	3.4993	2.32448	0.0141622	0.0283243	0.0708108	Enriched	Enriched	Enriched
P46109	Crk-like protein [OS=Homo sapiens]	4.72579	2.67025	0.0142162	0.0284324	0.0710811	Enriched	Enriched	Enriched
P45974-1	Ubiquitin carboxyl-terminal hydrolase 5 [OS=Homo sapiens]	17.863	9.5317	0.0142703	0.0285405	0.0713514	Enriched	Enriched	Enriched
P55072	Transitional endoplasmic reticulum ATPase [OS=Homo sapiens]	3.4976	2.67751	0.0143243	0.0286486	0.0716216	Enriched	Enriched	Enriched
P04183	Thymidine kinase, cytosolic [OS=Homo sapiens]	2.47392	1.89533	0.0143784	0.0287568	0.0718919	Enriched	Enriched	Enriched
P18583-9	Isoform I of Protein SON [OS=Homo sapiens]	3.85524	2.44605	0.0144324	0.0288649	0.0721622	Enriched	Enriched	Enriched
P55265-4	Isoform 4 of Double-stranded RNA-specific adenosine deaminase [OS=Homo sapiens]	12.0442	3.92703	0.0144865	0.028973	0.0724324	Enriched	Enriched	Enriched
P28482	mitogen-activated protein kinase 1 [OS=Homo sapiens]	13.7413	3.45813	0.0145405	0.0290811	0.0727027	Enriched	Enriched	Enriched
P35249	replication factor C subunit 4 [OS=Homo sapiens]	3.47063	2.50035	0.0145946	0.0291892	0.072973	Enriched	Enriched	Enriched
Q9Y490	Talin-1 [OS=Homo sapiens]	2.12	1.528	0.0146486	0.0292973	0.0732432	Enriched	Enriched	Enriched
Q96CW1	AP-2 complex subunit mu [OS=Homo sapiens]	4.80107	3.61753	0.0147027	0.0294054	0.0735135	Enriched	Enriched	Enriched
Q92917	G patch domain and KOW motifs-containing protein [OS=Homo sapiens]	2.3782	1.78971	0.0147568	0.0295135	0.0737838	Enriched	Enriched	Enriched
Q07960	rho GTPase-activating protein 1 [OS=Homo sapiens]	3.03646	2.24427	0.0148108	0.0296216	0.0740541	Enriched	Enriched	Enriched
Q9GZZ9-1	Ubiquitin-like modifier-activating enzyme 5 [OS=Homo sapiens]	1.5889	1.36642	0.0148649	0.0297297	0.0743243	Enriched	Enriched	Enriched
Q9P258	Protein RCC2 [OS=Homo sapiens]	2.61976	1.81865	0.0149189	0.0298378	0.0745946	Enriched	Enriched	Enriched
Q5DJT8	Cancer/testis antigen family 45 member A2 [OS=Homo sapiens]	1.33033	1.20401	0.014973	0.0299459	0.0748649	Enriched	Enriched	Enriched
O75400	pre-mRNA-processing factor 40 homolog A [OS=Homo sapiens]	40.0547	9.53615	0.015027	0.0300541	0.0751351	Enriched	Enriched	Enriched
P50552	Vasodilator-stimulated phosphoprotein [OS=Homo sapiens]	4.68074	2.76251	0.0150811	0.0301622	0.0754054	Enriched	Enriched	Enriched
P61758	Prefoldin subunit 3 [OS=Homo sapiens]	4.1217	2.76747	0.0151351	0.0302703	0.0756757	Enriched	Enriched	Enriched
Q8WX93-1	palladin [OS=Homo sapiens]	2.76527	1.98124	0.0151892	0.0303784	0.0759459	Enriched	Enriched	Enriched
Q96PK6-1	RNA-binding protein 14 [OS=Homo sapiens]	4.08086	3.30887	0.0152432	0.0304865	0.0762162	Enriched	Enriched	Enriched
P33993-1	DNA replication licensing factor MCM7 [OS=Homo sapiens]	3.71364	2.54229	0.0152973	0.0305946	0.0764865	Enriched	Enriched	Enriched
P47813	Eukaryotic translation initiation factor 1A, X-chromosomal [OS=Homo sapiens]	12.1243	4.17244	0.0153514	0.0307027	0.0767568	Enriched	Enriched	Enriched
O43399-7	Isoform 7 of Tumor protein D54 [OS=Homo sapiens]	1.81739	1.4432	0.0154054	0.0308108	0.077027	Enriched	Enriched	Enriched
P20700	Lamin-B1 [OS=Homo sapiens]	8.36476	6.02639	0.0154595	0.0309189	0.0772973	Enriched	Enriched	Enriched
P61163	Alpha-centractin [OS=Homo sapiens]	5.12772	4.39325	0.0155135	0.031027	0.0775676	Enriched	Enriched	Enriched
P35579-1	Myosin-9 [OS=Homo sapiens]	3.66093	3.01614	0.0155676	0.0311351	0.0778378	Enriched	Enriched	Enriched
Q07812-2	Isoform Beta of Apoptosis regulator BAX [OS=Homo sapiens]	1.98118	1.57346	0.0156216	0.0312432	0.0781081	Enriched	Enriched	Enriched
P31949	protein S100-A11 [OS=Homo sapiens]	1.59004	1.38048	0.0156757	0.0313514	0.0783784	Enriched	Enriched	Enriched
Q9UK41-2	Isoform 2 of Vacuolar protein sorting-associated protein 28 homolog [OS=Homo sapiens]	1.27175	1.18399	0.0157297	0.0314595	0.0786486	Enriched	Enriched	Enriched
P07437	tubulin beta chain [OS=Homo sapiens]	2.9423	2.02972	0.0157838	0.0315676	0.0789189	Enriched	Enriched	Enriched
Q8N1G4	Leucine-rich repeat-containing protein 47 [OS=Homo sapiens]	1.38486	1.2597	0.0158378	0.0316757	0.0791892	Enriched	Enriched	Enriched
Q8NCN5	Pyruvate dehydrogenase phosphatase regulatory subunit, mitochondrial [OS=Homo sapiens]	114.974	5.17759	0.0158919	0.0317838	0.0794595	Enriched	Enriched	Enriched
P26640	Valine--tRNA ligase [OS=Homo sapiens]	7.6159	3.89782	0.0159459	0.0318919	0.0797297	Enriched	Enriched	Enriched
Q12792-2	Twinfilin-1 [OS=Homo sapiens]	3.74878	2.84576	0.016	0.032	0.08	Enriched	Enriched	Enriched
Q8N684-3	Isoform 3 of Cleavage and polyadenylation specificity factor subunit 7 [OS=Homo sapiens]	2.86404	2.04554	0.0160541	0.0321081	0.0802703	Enriched	Enriched	Enriched
Q13564-4	Isoform 4 of NEDD8-activating enzyme E1 regulatory subunit [OS=Homo sapiens]	5.60569	2.89254	0.0161081	0.0322162	0.0805405	Enriched	Enriched	Enriched
Q9Y6M1	Insulin-like growth factor 2 mRNA-binding protein 2 [OS=Homo sapiens]	2.27147	1.79013	0.0161622	0.0323243	0.0808108	Enriched	Enriched	Enriched
Q2M2I8-1	AP2-associated protein kinase 1 [OS=Homo sapiens]	2.10679	1.58447	0.0162162	0.0324324	0.0810811	Enriched	Enriched	Enriched
P26641-2	Isoform 2 of Elongation factor 1-gamma [OS=Homo sapiens]	2.35509	1.75794	0.0162703	0.0325405	0.0813514	Enriched	Enriched	Enriched
Q13835	Plakophilin-1 [OS=Homo sapiens]	4.36341	2.95482	0.0163243	0.0326486	0.0816216	Enriched	Enriched	Enriched
O95816	BAG family molecular chaperone regulator 2 [OS=Homo sapiens]	2.1647	1.69232	0.0163784	0.0327568	0.0818919	Enriched	Enriched	Enriched
P06748	Nucleophosmin [OS=Homo sapiens]	2.10906	1.7797	0.0164324	0.0328649	0.0821622	Enriched	Enriched	Enriched
Q16527	Cysteine and glycine-rich protein 2 [OS=Homo sapiens]	2.62464	1.98925	0.0164865	0.032973	0.0824324	Enriched	Enriched	Enriched
O75223-1	gamma-glutamylcyclotransferase [OS=Homo sapiens]	3.80433	2.58729	0.0165405	0.0330811	0.0827027	Enriched	Enriched	Enriched
P49959-3	Isoform 3 of Double-strand break repair protein MRE11A [OS=Homo sapiens]	1.96292	1.58489	0.0165946	0.0331892	0.082973	Enriched	Enriched	Enriched
Q00325-1	Phosphate carrier protein, mitochondrial [OS=Homo sapiens]	97.5756	73.2229	0.0166486	0.0332973	0.0832432	Enriched	Enriched	Enriched
O60884	DnaJ homolog subfamily A member 2 [OS=Homo sapiens]	2.33488	1.77977	0.0167027	0.0334054	0.0835135	Enriched	Enriched	Enriched
Q9BZK7	F-box-like/WD repeat-containing protein TBL1XR1 [OS=Homo sapiens]	11.4034	8.68304	0.0167568	0.0335135	0.0837838	Enriched	Enriched	Enriched
O75436-1	Vacuolar protein sorting-associated protein 26A [OS=Homo sapiens]	8.71241	5.11845	0.0168108	0.0336216	0.0840541	Enriched	Enriched	Enriched
Q15003	Condensin complex subunit 2 [OS=Homo sapiens]	2.81526	2.14355	0.0168649	0.0337297	0.0843243	Enriched	Enriched	Enriched
Q15642	Cdc42-interacting protein 4 [OS=Homo sapiens]	18.4171	6.64291	0.0169189	0.0338378	0.0845946	Enriched	Enriched	Enriched
Q9UQB8	Brain-specific angiogenesis inhibitor 1-associated protein 2 [OS=Homo sapiens]	4.25228	2.38149	0.016973	0.0339459	0.0848649	Enriched	Enriched	Enriched
P62854	40S ribosomal protein S26 [OS=Homo sapiens]	2.58958	1.94943	0.017027	0.0340541	0.0851351	Enriched	Enriched	Enriched
P11021	78 kDa glucose-regulated protein [OS=Homo sapiens]	3.27588	2.45975	0.0170811	0.0341622	0.0854054	Enriched	Enriched	Enriched
Q96K21	Abscission/NoCut checkpoint regulator [OS=Homo sapiens]	2.1375	1.75407	0.0171351	0.0342703	0.0856757	Enriched	Enriched	Enriched
P22087	rRNA 2'-O-methyltransferase fibrillarin [OS=Homo sapiens]	3.17745	2.34131	0.0171892	0.0343784	0.0859459	Enriched	Enriched	Enriched
P39748	Flap endonuclease 1 [OS=Homo sapiens]	30.7285	25.8193	0.0172432	0.0344865	0.0862162	Enriched	Enriched	Enriched
O00116	Alkyldihydroxyacetonephosphate synthase, peroxisomal [OS=Homo sapiens]	2.6709	2.34265	0.0172973	0.0345946	0.0864865	Enriched	Enriched	Enriched
O60763-2	Isoform 2 of General vesicular transport factor p115 [OS=Homo sapiens]	5.72687	3.29262	0.0173514	0.0347027	0.0867568	Enriched	Enriched	Enriched
Q96B26	Exosome complex component RRP43 [OS=Homo sapiens]	10.165	3.64846	0.0174054	0.0348108	0.087027	Enriched	Enriched	Enriched
P09525	annexin A4 [OS=Homo sapiens]	3.01646	2.15086	0.0174595	0.0349189	0.0872973	Enriched	Enriched	Enriched
P52948-1	nuclear pore complex protein Nup98-Nup96 [OS=Homo sapiens]	4.02274	2.94223	0.0175135	0.035027	0.0875676	Enriched	Enriched	Enriched
P62266	40S ribosomal protein S23 [OS=Homo sapiens]	2.38244	2.04234	0.0175676	0.0351351	0.0878378	Enriched	Enriched	Enriched
Q15018	BRISC complex subunit Abro1 [OS=Homo sapiens]	1.2943	1.21546	0.0176216	0.0352432	0.0881081	Enriched	Enriched	Enriched
P40261	Nicotinamide N-methyltransferase [OS=Homo sapiens]	15.6391	12.0741	0.0176757	0.0353514	0.0883784	Enriched	Enriched	Enriched
O75934	Pre-mRNA-splicing factor spf27 [OS=Homo sapiens]	3.9271	3.52863	0.0177297	0.0354595	0.0886486	Enriched	Enriched	Enriched
P20645	Cation-dependent mannose-6-phosphate receptor [OS=Homo sapiens]	7.63204	5.88836	0.0177838	0.0355676	0.0889189	Enriched	Enriched	Enriched
O95721	Synaptosomal-associated protein 29 [OS=Homo sapiens]	2.88653	2.29646	0.0178378	0.0356757	0.0891892	Enriched	Enriched	Enriched
P46087-4	Isoform 4 of Probable 28S rRNA (cytosine(4447)-C(5))-methyltransferase [OS=Homo sapiens]	4.8101	3.68295	0.0178919	0.0357838	0.0894595	Enriched	Enriched	Enriched
P39019	40S ribosomal protein S19 [OS=Homo sapiens]	2.20726	1.68542	0.0179459	0.0358919	0.0897297	Enriched	Enriched	Enriched
Q13423	NAD(P) transhydrogenase, mitochondrial [OS=Homo sapiens]	3.13642	2.95316	0.018	0.036	0.09	Enriched	Enriched	Enriched
Q15046-2	Isoform Mitochondrial of Lysine--tRNA ligase [OS=Homo sapiens]	6.80385	4.79581	0.0180541	0.0361081	0.0902703	Enriched	Enriched	Enriched
P47756-2	Isoform 2 of F-actin-capping protein subunit beta [OS=Homo sapiens]	14.5163	10.0526	0.0181081	0.0362162	0.0905405	Enriched	Enriched	Enriched
O15127	Secretory carrier-associated membrane protein 2 [OS=Homo sapiens]	1.36455	1.26186	0.0181622	0.0363243	0.0908108	Enriched	Enriched	Enriched
Q92922	SWI/SNF complex subunit SMARCC1 [OS=Homo sapiens]	2.25363	1.95289	0.0182162	0.0364324	0.0910811	Enriched	Enriched	Enriched
Q92609-2	Isoform 2 of TBC1 domain family member 5 [OS=Homo sapiens]	1.82715	1.51065	0.0182703	0.0365405	0.0913514	Enriched	Enriched	Enriched
Q16222-1	UDP-N-acetylhexosamine pyrophosphorylase [OS=Homo sapiens]	2.84971	2.12654	0.0183243	0.0366486	0.0916216	Enriched	Enriched	Enriched
Q96AT1	Uncharacterized protein KIAA1143 [OS=Homo sapiens]	2.06637	1.70905	0.0183784	0.0367568	0.0918919	Enriched	Enriched	Enriched
Q13748-1	tubulin alpha-3C/D chain [OS=Homo sapiens]	2.3612	1.99465	0.0184324	0.0368649	0.0921622	Enriched	Enriched	Enriched
Q7L5N1	COP9 signalosome complex subunit 6 [OS=Homo sapiens]	1.31917	1.22072	0.0184865	0.036973	0.0924324	Enriched	Enriched	Enriched
Q7Z478	ATP-dependent RNA helicase Dhx29 [OS=Homo sapiens]	2.17765	1.78781	0.0185405	0.0370811	0.0927027	Enriched	Enriched	Enriched
Q02413	Desmoglein-1 [OS=Homo sapiens]	2.65634	2.36564	0.0185946	0.0371892	0.092973	Enriched	Enriched	Enriched
P51858	hepatoma-derived growth factor [OS=Homo sapiens]	8.78902	7.64313	0.0186486	0.0372973	0.0932432	Enriched	Enriched	Enriched
P22061-2	Isoform 2 of Protein-L-isoaspartate(D-aspartate) O-methyltransferase [OS=Homo sapiens]	2.32844	1.80747	0.0187027	0.0374054	0.0935135	Enriched	Enriched	Enriched
Q9Y6A5	Transforming acidic coiled-coil-containing protein 3 [OS=Homo sapiens]	4.67664	4.38703	0.0187568	0.0375135	0.0937838	Enriched	Enriched	Enriched
P0C0S8	histone H2A type 1 [OS=Homo sapiens]	2.33469	1.80445	0.0188108	0.0376216	0.0940541	Enriched	Enriched	Enriched
Q15459	splicing factor 3A subunit 1 [OS=Homo sapiens]	3.26365	2.51454	0.0188649	0.0377297	0.0943243	Enriched	Enriched	Enriched
P55036-1	26S proteasome non-ATPase regulatory subunit 4 [OS=Homo sapiens]	4.40811	3.44809	0.0189189	0.0378378	0.0945946	Enriched	Enriched	Enriched
Q16555-1	Dihydropyrimidinase-related protein 2 [OS=Homo sapiens]	6.09045	3.51754	0.018973	0.0379459	0.0948649	Enriched	Enriched	Enriched
P09382	Galectin-1 [OS=Homo sapiens]	1.93167	1.8231	0.019027	0.0380541	0.0951351	Enriched	Enriched	Enriched
P50991	T-complex protein 1 subunit delta [OS=Homo sapiens]	2.25855	1.82575	0.0190811	0.0381622	0.0954054	Enriched	Enriched	Enriched
P15924-1	Desmoplakin [OS=Homo sapiens]	3.59614	3.2636	0.0191351	0.0382703	0.0956757	Enriched	Enriched	Enriched
Q8N6T3-2	Isoform 2 of ADP-ribosylation factor GTPase-activating protein 1 [OS=Homo sapiens]	2.04304	1.63948	0.0191892	0.0383784	0.0959459	Enriched	Enriched	Enriched
Q92900	Regulator of nonsense transcripts 1 [OS=Homo sapiens]	3.71497	2.85119	0.0192432	0.0384865	0.0962162	Enriched	Enriched	Enriched
P05109	Protein S100-A8 [OS=Homo sapiens]	5.04979	4.25321	0.0192973	0.0385946	0.0964865	Enriched	Enriched	Enriched
Q9UBG0	C-type mannose receptor 2 [OS=Homo sapiens]	1.74776	1.57669	0.0193514	0.0387027	0.0967568	Enriched	Enriched	Enriched
P62195-1	26S protease regulatory subunit 8 [OS=Homo sapiens]	3.50201	2.69982	0.0194054	0.0388108	0.097027	Enriched	Enriched	Enriched
O43681	ATPase ASNA1 [OS=Homo sapiens]	1.36187	1.2498	0.0194595	0.0389189	0.0972973	Enriched	Enriched	Enriched
O75494-1	Serine/arginine-rich splicing factor 10 [OS=Homo sapiens]	1.32034	1.22158	0.0195135	0.039027	0.0975676	Enriched	Enriched	Enriched
P08754	Guanine nucleotide-binding protein G(k) subunit alpha [OS=Homo sapiens]	1.28424	1.21825	0.0195676	0.0391351	0.0978378	Enriched	Enriched	Enriched
Q14978-2	Isoform Beta of Nucleolar and coiled-body phosphoprotein 1 [OS=Homo sapiens]	1.90227	1.65446	0.0196216	0.0392432	0.0981081	Enriched	Enriched	Enriched
O75179-1	Ankyrin repeat domain-containing protein 17 [OS=Homo sapiens]	1.26042	1.18121	0.0196757	0.0393514	0.0983784	Enriched	Enriched	Enriched
P07305	Histone H1.0 [OS=Homo sapiens]	2.10153	1.76971	0.0197297	0.0394595	0.0986486	Enriched	Enriched	Enriched
P15311	Ezrin [OS=Homo sapiens]	6.22178	4.11724	0.0197838	0.0395676	0.0989189	Enriched	Enriched	Enriched
Q9H6Z4	Ran-binding protein 3 [OS=Homo sapiens]	1.64497	1.46531	0.0198378	0.0396757	0.0991892	Enriched	Enriched	Enriched
Q9GZU8	Protein FAM192A [OS=Homo sapiens]	109.303	103.799	0.0198919	0.0397838	0.0994595	Enriched	Enriched	Enriched
O75694	nuclear pore complex protein nup155 [OS=Homo sapiens]	2.08082	1.66349	0.0199459	0.0398919	0.0997297	Enriched	Enriched	Enriched
P49720	proteasome subunit beta type-3 [OS=Homo sapiens]	4.5065	2.66443	0.02	0.04	0.1	Enriched	Enriched	Enriched
Q9UH17-1	DNA dC->dU-editing enzyme APOBEC-3B [OS=Homo sapiens]	1.47205	1.40149	0.0200541	0.0401081	0.10027	Enriched	Enriched	Enriched
Q02543	60S ribosomal protein L18a [OS=Homo sapiens]	1.40969	1.30492	0.0201081	0.0402162	0.100541	Enriched	Enriched	Enriched
Q14566	DNA replication licensing factor MCM6 [OS=Homo sapiens]	8.39892	6.90908	0.0201622	0.0403243	0.100811	Enriched	Enriched	Enriched
P18077	60S ribosomal protein L35a [OS=Homo sapiens]	1.2757	1.21298	0.0202162	0.0404324	0.101081	Enriched	Enriched	Enriched
Q99714-1	3-hydroxyacyl-CoA dehydrogenase type-2 [OS=Homo sapiens]	5.58953	4.34874	0.0202703	0.0405405	0.101351	Enriched	Enriched	Enriched
Q9BXB5	Oxysterol-binding protein-related protein 10 [OS=Homo sapiens]	1.90596	1.61274	0.0203243	0.0406486	0.101622	Enriched	Enriched	Enriched
Q9BQE5	apolipoprotein L2 [OS=Homo sapiens]	2.7164	2.25826	0.0203784	0.0407568	0.101892	Enriched	Enriched	Enriched
O60784-2	Isoform 2 of Target of Myb protein 1 [OS=Homo sapiens]	1.31713	1.21739	0.0204324	0.0408649	0.102162	Enriched	Enriched	Enriched
O75083	WD repeat-containing protein 1 [OS=Homo sapiens]	5.03614	3.8381	0.0204865	0.040973	0.102432	Enriched	Enriched	Enriched
Q14247-1	Src substrate cortactin [OS=Homo sapiens]	1.52826	1.40276	0.0205405	0.0410811	0.102703	Enriched	Enriched	Enriched
P27695	DNA-(apurinic or apyrimidinic site) lyase [OS=Homo sapiens]	1.38546	1.30081	0.0205946	0.0411892	0.102973	Enriched	Enriched	Enriched
Q9UKY7	Protein CDV3 homolog [OS=Homo sapiens]	2.13315	1.74965	0.0206486	0.0412973	0.103243	Enriched	Enriched	Enriched
P49327	Fatty acid synthase [OS=Homo sapiens]	6.29034	5.28565	0.0207027	0.0414054	0.103514	Enriched	Enriched	Enriched
P62318	small nuclear ribonucleoprotein sm d3 [OS=Homo sapiens]	2.28371	1.88986	0.0207568	0.0415135	0.103784	Enriched	Enriched	Enriched
P21399	Cytoplasmic aconitate hydratase [OS=Homo sapiens]	3.61731	3.02487	0.0208108	0.0416216	0.104054	Enriched	Enriched	Enriched
O75347	Tubulin-specific chaperone A [OS=Homo sapiens]	1.35259	1.2541	0.0208649	0.0417297	0.104324	Enriched	Enriched	Enriched
P46977	Dolichyl-diphosphooligosaccharide--protein glycosyltransferase subunit STT3A [OS=Homo sapiens]	3.89925	3.16213	0.0209189	0.0418378	0.104595	Enriched	Enriched	Enriched
Q9Y5B8	Nucleoside diphosphate kinase 7 [OS=Homo sapiens]	2.44645	1.96955	0.020973	0.0419459	0.104865	Enriched	Enriched	Enriched
O14929	histone acetyltransferase type B catalytic subunit [OS=Homo sapiens]	4.38014	3.96254	0.021027	0.0420541	0.105135	Enriched	Enriched	Enriched
P08195	4F2 cell-surface antigen heavy chain [OS=Homo sapiens]	3.43389	2.76815	0.0210811	0.0421622	0.105405	Enriched	Enriched	Enriched
Q9NVA2-2	Isoform 2 of Septin-11 [OS=Homo sapiens]	1.71529	1.54722	0.0211351	0.0422703	0.105676	Enriched	Enriched	Enriched
P25789	Proteasome subunit alpha type-4 [OS=Homo sapiens]	5.75934	3.52625	0.0211892	0.0423784	0.105946	Enriched	Enriched	Enriched
P53041	Serine/threonine-protein phosphatase 5 [OS=Homo sapiens]	2.69764	2.1307	0.0212432	0.0424865	0.106216	Enriched	Enriched	Enriched
Q04837	Single-stranded DNA-binding protein, mitochondrial [OS=Homo sapiens]	4.13884	2.91537	0.0212973	0.0425946	0.106486	Enriched	Enriched	Enriched
P35658-5	Isoform 5 of Nuclear pore complex protein Nup214 [OS=Homo sapiens]	1.98625	1.70817	0.0213514	0.0427027	0.106757	Enriched	Enriched	Enriched
P40227-1	T-complex protein 1 subunit zeta [OS=Homo sapiens]	2.77229	2.36329	0.0214054	0.0428108	0.107027	Enriched	Enriched	Enriched
O95817	BAG family molecular chaperone regulator 3 [OS=Homo sapiens]	3.59763	3.08713	0.0214595	0.0429189	0.107297	Enriched	Enriched	Enriched
P32320	cytidine deaminase [OS=Homo sapiens]	1.28863	1.21275	0.0215135	0.043027	0.107568	Enriched	Enriched	Enriched
P63173	60s ribosomal protein l38 [OS=Homo sapiens]	3.74513	2.85799	0.0215676	0.0431351	0.107838	Enriched	Enriched	Enriched
Q5T6F2	Ubiquitin-associated protein 2 [OS=Homo sapiens]	1.75718	1.58849	0.0216216	0.0432432	0.108108	Enriched	Enriched	Enriched
P62316	Small nuclear ribonucleoprotein Sm D2 [OS=Homo sapiens]	1.61303	1.45016	0.0216757	0.0433514	0.108378	Enriched	Enriched	Enriched
Q96GY0	Zinc finger C2HC domain-containing protein 1A [OS=Homo sapiens]	3.29085	2.64438	0.0217297	0.0434595	0.108649	Enriched	Enriched	Enriched
P34897-1	Serine hydroxymethyltransferase, mitochondrial [OS=Homo sapiens]	2.31728	2.13526	0.0217838	0.0435676	0.108919	Enriched	Enriched	Enriched
P63244	Receptor of activated protein C kinase 1 [OS=Homo sapiens]	2.25839	1.9291	0.0218378	0.0436757	0.109189	Enriched	Enriched	Enriched
Q9Y3E5	Peptidyl-tRNA hydrolase 2, mitochondrial [OS=Homo sapiens]	7.10947	6.66016	0.0218919	0.0437838	0.109459	Enriched	Enriched	Enriched
P43686	26S protease regulatory subunit 6B [OS=Homo sapiens]	1.91198	1.79309	0.0219459	0.0438919	0.10973	Enriched	Enriched	Enriched
Q8NE71-1	ATP-binding cassette sub-family F member 1 [OS=Homo sapiens]	16.2508	13.4765	0.022	0.044	0.11	Enriched	Enriched	Enriched
P04150-3	Isoform Alpha-2 of Glucocorticoid receptor [OS=Homo sapiens]	2.29914	1.91688	0.0220541	0.0441081	0.11027	Enriched	Enriched	Enriched
Q96DB5	regulator of microtubule dynamics protein 1 [OS=Homo sapiens]	2.05692	1.81245	0.0221081	0.0442162	0.110541	Enriched	Enriched	Enriched
P49588-2	Isoform 2 of Alanine--tRNA ligase, cytoplasmic [OS=Homo sapiens]	1.71484	1.55898	0.0221622	0.0443243	0.110811	Enriched	Enriched	Enriched
Q02539	Histone H1.1 [OS=Homo sapiens]	56.6459	7.15412	0.0222162	0.0444324	0.111081	Enriched	Enriched	Enriched
P35606	Coatomer subunit beta' [OS=Homo sapiens]	5.26267	2.9645	0.0222703	0.0445405	0.111351	Enriched	Enriched	Enriched
P13798	Acylamino-acid-releasing enzyme [OS=Homo sapiens]	2.16652	1.98408	0.0223243	0.0446486	0.111622	Enriched	Enriched	Enriched
P30153	serine/threonine-protein phosphatase 2A 65 kDa regulatory subunit A alpha isoform [OS=Homo sapiens]	5.17602	4.67199	0.0223784	0.0447568	0.111892	Enriched	Enriched	Enriched
P40429	60S ribosomal protein L13a [OS=Homo sapiens]	1.5316	1.38769	0.0224324	0.0448649	0.112162	Enriched	Enriched	Enriched
Q9HDC9	Adipocyte plasma membrane-associated protein [OS=Homo sapiens]	2.96249	2.22699	0.0224865	0.044973	0.112432	Enriched	Enriched	Enriched
P40937-1	Replication factor C subunit 5 [OS=Homo sapiens]	1.28058	1.22761	0.0225405	0.0450811	0.112703	Enriched	Enriched	Enriched
Q9NZJ9-2	Isoform 2 of Diphosphoinositol polyphosphate phosphohydrolase 2 [OS=Homo sapiens]	14.4735	7.18135	0.0225946	0.0451892	0.112973	Enriched	Enriched	Enriched
Q8N1N4	Keratin, type II cytoskeletal 78 [OS=Homo sapiens]	1.78401	1.64123	0.0226486	0.0452973	0.113243	Enriched	Enriched	Enriched
P51114-1	Fragile X mental retardation syndrome-related protein 1 [OS=Homo sapiens]	3.19011	2.16775	0.0227027	0.0454054	0.113514	Enriched	Enriched	Enriched
P43897	Elongation factor Ts, mitochondrial [OS=Homo sapiens]	3.20061	3.0715	0.0227568	0.0455135	0.113784	Enriched	Enriched	Enriched
P55786	puromycin-sensitive aminopeptidase [OS=Homo sapiens]	2.81123	2.26534	0.0228108	0.0456216	0.114054	Enriched	Enriched	Enriched
Q96P63-2	Isoform 2 of Serpin B12 [OS=Homo sapiens]	2.7333	2.34773	0.0228649	0.0457297	0.114324	Enriched	Enriched	Enriched
O43175	D-3-phosphoglycerate dehydrogenase [OS=Homo sapiens]	5.99885	4.99236	0.0229189	0.0458378	0.114595	Enriched	Enriched	Enriched
P22735	Protein-glutamine gamma-glutamyltransferase K [OS=Homo sapiens]	2.97412	2.572	0.022973	0.0459459	0.114865	Enriched	Enriched	Enriched
P38159-1	RNA-binding motif protein, X chromosome [OS=Homo sapiens]	18.3183	17.5664	0.023027	0.0460541	0.115135	Enriched	Enriched	Enriched
P23919	thymidylate kinase [OS=Homo sapiens]	3.00157	2.84573	0.0230811	0.0461622	0.115405	Enriched	Enriched	Enriched
Q13573	SNW domain-containing protein 1 [OS=Homo sapiens]	3.40034	2.56191	0.0231351	0.0462703	0.115676	Enriched	Enriched	Enriched
P52815	39S ribosomal protein L12, mitochondrial [OS=Homo sapiens]	5.42678	5.0259	0.0231892	0.0463784	0.115946	Enriched	Enriched	Enriched
P61604	10 kDa heat shock protein, mitochondrial [OS=Homo sapiens]	2.69902	2.51799	0.0232432	0.0464865	0.116216	Enriched	Enriched	Enriched
Q14320	Protein FAM50A [OS=Homo sapiens]	1.41792	1.32799	0.0232973	0.0465946	0.116486	Enriched	Enriched	Enriched
P16615	Sarcoplasmic/endoplasmic reticulum calcium ATPase 2 [OS=Homo sapiens]	12.0005	6.16211	0.0233514	0.0467027	0.116757	Enriched	Enriched	Enriched
Q8NG31-1	Protein CASC5 [OS=Homo sapiens]	2.05036	1.7525	0.0234054	0.0468108	0.117027	Enriched	Enriched	Enriched
P11388-4	Isoform 4 of DNA topoisomerase 2-alpha [OS=Homo sapiens]	2.67475	2.27821	0.0234595	0.0469189	0.117297	Enriched	Enriched	Enriched
Q5JTV8-3	Isoform 3 of Torsin-1A-interacting protein 1 [OS=Homo sapiens]	2.11118	1.96935	0.0235135	0.047027	0.117568	Enriched	Enriched	Enriched
Q14692	ribosome biogenesis protein BMS1 homolog [OS=Homo sapiens]	6.80339	3.70313	0.0235676	0.0471351	0.117838	Enriched	Enriched	Enriched
O94979-8	Isoform 8 of Protein transport protein Sec31A [OS=Homo sapiens]	12.6381	7.48998	0.0236216	0.0472432	0.118108	Enriched	Enriched	Enriched
P60468	protein transport protein Sec61 subunit beta [OS=Homo sapiens]	1.89399	1.74343	0.0236757	0.0473514	0.118378	Enriched	Enriched	Enriched
O00273-1	DNA fragmentation factor subunit alpha [OS=Homo sapiens]	2.91379	2.43277	0.0237297	0.0474595	0.118649	Rejected	Enriched	Enriched
Q96EY7-1	pentatricopeptide repeat domain-containing protein 3, mitochondrial [OS=Homo sapiens]	1.93258	1.70846	0.0237838	0.0475676	0.118919	Rejected	Enriched	Enriched
Q9BV38	WD repeat-containing protein 18 [OS=Homo sapiens]	1.96499	1.74776	0.0238378	0.0476757	0.119189	Rejected	Enriched	Enriched
Q9GZL7	ribosome biogenesis protein WDR12 [OS=Homo sapiens]	1.3257	1.26578	0.0238919	0.0477838	0.119459	Rejected	Enriched	Enriched
Q06124	tyrosine-protein phosphatase non-receptor type 11 [OS=Homo sapiens]	2.29323	1.99512	0.0239459	0.0478919	0.11973	Rejected	Enriched	Enriched
Q5SSJ5-1	Heterochromatin protein 1-binding protein 3 [OS=Homo sapiens]	2.38346	2.0669	0.024	0.048	0.12	Rejected	Enriched	Enriched
Q92692-1	Nectin-2 [OS=Homo sapiens]	2.23076	1.8525	0.0240541	0.0481081	0.12027	Enriched	Enriched	Enriched
P07858	Cathepsin B [OS=Homo sapiens]	1.85494	1.66681	0.0241081	0.0482162	0.120541	Enriched	Enriched	Enriched
O75947-1	ATP synthase subunit d, mitochondrial [OS=Homo sapiens]	2.93525	2.77371	0.0241622	0.0483243	0.120811	Enriched	Enriched	Enriched
Q9Y3D8	Adenylate kinase isoenzyme 6 [OS=Homo sapiens]	1.32476	1.27167	0.0242162	0.0484324	0.121081	Enriched	Enriched	Enriched
P62701	40S ribosomal protein S4, X isoform [OS=Homo sapiens]	3.91556	3.35272	0.0242703	0.0485405	0.121351	Rejected	Enriched	Enriched
Q99700-1	Ataxin-2 [OS=Homo sapiens]	5.04102	3.19043	0.0243243	0.0486486	0.121622	Rejected	Enriched	Enriched
P48637	glutathione synthetase [OS=Homo sapiens]	1.29338	1.24887	0.0243784	0.0487568	0.121892	Rejected	Enriched	Enriched
P35637-1	RNA-binding protein FUS [OS=Homo sapiens]	2.95895	2.28373	0.0244324	0.0488649	0.122162	Rejected	Enriched	Enriched
P11166	Solute carrier family 2, facilitated glucose transporter member 1 [OS=Homo sapiens]	1.29992	1.25614	0.0244865	0.048973	0.122432	Rejected	Enriched	Enriched
P38919	Eukaryotic initiation factor 4A-III [OS=Homo sapiens]	2.17696	1.90177	0.0245405	0.0490811	0.122703	Rejected	Enriched	Enriched
P27708	CAD protein [OS=Homo sapiens]	2.61833	2.21733	0.0245946	0.0491892	0.122973	Rejected	Enriched	Enriched
Q9NXH9-1	tRNA (guanine(26)-N(2))-dimethyltransferase [OS=Homo sapiens]	3.95348	3.61711	0.0246486	0.0492973	0.123243	Rejected	Enriched	Enriched
P63000-2	Isoform B of Ras-related C3 botulinum toxin substrate 1 [OS=Homo sapiens]	2.71399	2.4327	0.0247027	0.0494054	0.123514	Rejected	Enriched	Enriched
Q04206	Transcription factor p65 [OS=Homo sapiens]	6.17549	5.84512	0.0247568	0.0495135	0.123784	Rejected	Enriched	Enriched
Q14677-1	Clathrin interactor 1 [OS=Homo sapiens]	1.85848	1.6964	0.0248108	0.0496216	0.124054	Rejected	Enriched	Enriched
P14550	alcohol dehydrogenase [NADP(+)] [OS=Homo sapiens]	3.31409	2.9668	0.0248649	0.0497297	0.124324	Rejected	Enriched	Enriched
P17931	Galectin-3 [OS=Homo sapiens]	1.91108	1.76845	0.0249189	0.0498378	0.124595	Rejected	Enriched	Enriched
A8K2U0	Alpha-2-macroglobulin-like protein 1 [OS=Homo sapiens]	2.39577	2.29522	0.024973	0.0499459	0.124865	Rejected	Enriched	Enriched
Q8WVV4-1	Isoform 1 of Protein POF1B [OS=Homo sapiens]	7.03102	6.5234	0.025027	0.0500541	0.125135	Rejected	Enriched	Enriched
P46940	Ras GTPase-activating-like protein IQGAP1 [OS=Homo sapiens]	5.43929	5.10131	0.0250811	0.0501622	0.125405	Rejected	Enriched	Enriched
P49023-3	Isoform Gamma of Paxillin [OS=Homo sapiens]	2.71438	2.30536	0.0251351	0.0502703	0.125676	Rejected	Enriched	Enriched
Q96QK1	Vacuolar protein sorting-associated protein 35 [OS=Homo sapiens]	2.58219	2.31357	0.0251892	0.0503784	0.125946	Rejected	Enriched	Enriched
P30042-1	ES1 protein homolog, mitochondrial [OS=Homo sapiens]	6.19237	5.92833	0.0252432	0.0504865	0.126216	Rejected	Enriched	Enriched
P61353	60S ribosomal protein L27 [OS=Homo sapiens]	2.21758	2.1006	0.0252973	0.0505946	0.126486	Rejected	Enriched	Enriched
Q13740-1	CD166 antigen [OS=Homo sapiens]	11.7509	10.6393	0.0253514	0.0507027	0.126757	Rejected	Enriched	Enriched
P00403	Cytochrome c oxidase subunit 2 [OS=Homo sapiens]	1.33861	1.28038	0.0254054	0.0508108	0.127027	Rejected	Enriched	Enriched
P53004	Biliverdin reductase A [OS=Homo sapiens]	19.1138	18.366	0.0254595	0.0509189	0.127297	Rejected	Enriched	Enriched
Q96IU4	Protein ABHD14B [OS=Homo sapiens]	2.62836	2.53808	0.0255135	0.051027	0.127568	Rejected	Enriched	Enriched
Q00796	Sorbitol dehydrogenase [OS=Homo sapiens]	1.51117	1.40306	0.0255676	0.0511351	0.127838	Rejected	Enriched	Enriched
O95239-1	Chromosome-associated kinesin KIF4A [OS=Homo sapiens]	3.08771	2.89669	0.0256216	0.0512432	0.128108	Rejected	Enriched	Enriched
Q13838-2	Isoform 2 of Spliceosome RNA helicase DDX39B [OS=Homo sapiens]	9.40559	9.14755	0.0256757	0.0513514	0.128378	Rejected	Enriched	Enriched
Q9NQR4	Omega-amidase NIT2 [OS=Homo sapiens]	2.86341	2.55668	0.0257297	0.0514595	0.128649	Rejected	Enriched	Enriched
O75937	DnaJ homolog subfamily C member 8 [OS=Homo sapiens]	2.42921	2.12511	0.0257838	0.0515676	0.128919	Rejected	Enriched	Enriched
O75608	Acyl-protein thioesterase 1 [OS=Homo sapiens]	1.945	1.79335	0.0258378	0.0516757	0.129189	Rejected	Enriched	Enriched
P63151-2	Isoform 2 of Serine/threonine-protein phosphatase 2A 55 kDa regulatory subunit B alpha isoform [OS=Homo sapiens]	2.05673	1.87745	0.0258919	0.0517838	0.129459	Rejected	Enriched	Enriched
P68400	Casein kinase II subunit alpha [OS=Homo sapiens]	3.34516	2.9451	0.0259459	0.0518919	0.12973	Rejected	Enriched	Enriched
Q6FI81-1	Anamorsin [OS=Homo sapiens]	1.72393	1.6294	0.026	0.052	0.13	Rejected	Enriched	Enriched
Q16643-3	Isoform 3 of Drebrin [OS=Homo sapiens]	1.80025	1.69505	0.0260541	0.0521081	0.13027	Rejected	Enriched	Enriched
P61106	Ras-related protein Rab-14 [OS=Homo sapiens]	3.7781	3.63607	0.0261081	0.0522162	0.130541	Rejected	Enriched	Enriched
Q9BW60	Elongation of very long chain fatty acids protein 1 [OS=Homo sapiens]	1.26474	1.23778	0.0261622	0.0523243	0.130811	Rejected	Enriched	Enriched
Q9HCY8	protein S100-A14 [OS=Homo sapiens]	2.38456	2.22117	0.0262162	0.0524324	0.131081	Rejected	Enriched	Enriched
Q9H6T3	RNA polymerase II-associated protein 3 [OS=Homo sapiens]	2.58992	2.44595	0.0262703	0.0525405	0.131351	Rejected	Enriched	Enriched
Q13151	Heterogeneous nuclear ribonucleoprotein A0 [OS=Homo sapiens]	2.92986	2.67329	0.0263243	0.0526486	0.131622	Rejected	Enriched	Enriched
Q13263	Transcription intermediary factor 1-beta [OS=Homo sapiens]	3.02354	2.81163	0.0263784	0.0527568	0.131892	Rejected	Enriched	Enriched
P62847-4	Isoform 4 of 40S ribosomal protein S24 [OS=Homo sapiens]	1.96611	1.88689	0.0264324	0.0528649	0.132162	Rejected	Enriched	Enriched
P13674-1	prolyl 4-hydroxylase subunit alpha-1 [OS=Homo sapiens]	2.18504	2.06377	0.0264865	0.052973	0.132432	Rejected	Enriched	Enriched
Q15043	Zinc transporter ZIP14 [OS=Homo sapiens]	13.4293	12.2156	0.0265405	0.0530811	0.132703	Rejected	Enriched	Enriched
Q00839	Heterogeneous nuclear ribonucleoprotein U [OS=Homo sapiens]	2.35958	2.14037	0.0265946	0.0531892	0.132973	Rejected	Enriched	Enriched
Q27J81	Inverted formin-2 [OS=Homo sapiens]	1.65123	1.58584	0.0266486	0.0532973	0.133243	Rejected	Enriched	Enriched
Q12797	Aspartyl/Asparaginyl beta-hydroxylase [OS=Homo sapiens]	1.4273	1.37069	0.0267027	0.0534054	0.133514	Rejected	Enriched	Enriched
Q9BTT0	Acidic leucine-rich nuclear phosphoprotein 32 family member E [OS=Homo sapiens]	3.73663	2.98719	0.0267568	0.0535135	0.133784	Rejected	Enriched	Enriched
O75439	mitochondrial-processing peptidase subunit beta [OS=Homo sapiens]	1.92075	1.85615	0.0268108	0.0536216	0.134054	Rejected	Enriched	Enriched
Q6Y7W6-3	Isoform 2 of PERQ amino acid-rich with GYF domain-containing protein 2 [OS=Homo sapiens]	2.212	1.93729	0.0268649	0.0537297	0.134324	Rejected	Enriched	Enriched
Q14152	Eukaryotic translation initiation factor 3 subunit A [OS=Homo sapiens]	2.58826	2.32288	0.0269189	0.0538378	0.134595	Rejected	Enriched	Enriched
Q7L0Y3	Mitochondrial ribonuclease P protein 1 [OS=Homo sapiens]	2.35586	2.2687	0.026973	0.0539459	0.134865	Rejected	Enriched	Enriched
P54819	Adenylate kinase 2, mitochondrial [OS=Homo sapiens]	3.99491	2.83218	0.027027	0.0540541	0.135135	Rejected	Enriched	Enriched
P57105	Synaptojanin-2-binding protein [OS=Homo sapiens]	1.26658	1.23252	0.0270811	0.0541622	0.135405	Rejected	Enriched	Enriched
Q15075	Early endosome antigen 1 [OS=Homo sapiens]	4.58114	3.80302	0.0271351	0.0542703	0.135676	Rejected	Enriched	Enriched
P62906	60S ribosomal protein L10A [OS=Homo sapiens]	16.9751	6.38333	0.0271892	0.0543784	0.135946	Rejected	Enriched	Enriched
P48556	26S proteasome non-ATPase regulatory subunit 8 [OS=Homo sapiens]	1.21934	1.19209	0.0272432	0.0544865	0.136216	Rejected	Enriched	Enriched
Q16531	DNA damage-binding protein 1 [OS=Homo sapiens]	1.90915	1.74437	0.0272973	0.0545946	0.136486	Rejected	Enriched	Enriched
P56182	Ribosomal RNA processing protein 1 homolog A [OS=Homo sapiens]	2.27988	2.20876	0.0273514	0.0547027	0.136757	Rejected	Enriched	Enriched
P59998-3	Isoform 3 of Actin-related protein 2/3 complex subunit 4 [OS=Homo sapiens]	1.29226	1.25234	0.0274054	0.0548108	0.137027	Rejected	Enriched	Enriched
P08708	40S ribosomal protein S17 [OS=Homo sapiens]	10.9401	10.1826	0.0274595	0.0549189	0.137297	Rejected	Enriched	Enriched
Q13619-1	cullin-4A [OS=Homo sapiens]	1.7988	1.685	0.0275135	0.055027	0.137568	Rejected	Enriched	Enriched
Q9UIA9	exportin-7 [OS=Homo sapiens]	1.23189	1.20577	0.0275676	0.0551351	0.137838	Rejected	Enriched	Enriched
Q9GZZ1-1	N-alpha-acetyltransferase 50 [OS=Homo sapiens]	1.38579	1.34077	0.0276216	0.0552432	0.138108	Rejected	Enriched	Enriched
P30040-1	Endoplasmic reticulum resident protein 29 [OS=Homo sapiens]	11.01	10.7737	0.0276757	0.0553514	0.138378	Rejected	Enriched	Enriched
P42224-1	Signal transducer and activator of transcription 1-alpha/beta [OS=Homo sapiens]	7.37766	6.71569	0.0277297	0.0554595	0.138649	Rejected	Enriched	Enriched
P49189	4-trimethylaminobutyraldehyde dehydrogenase [OS=Homo sapiens]	2.21571	2.05876	0.0277838	0.0555676	0.138919	Rejected	Enriched	Enriched
Q96KR1	Zinc finger RNA-binding protein [OS=Homo sapiens]	4.03916	3.49121	0.0278378	0.0556757	0.139189	Rejected	Enriched	Enriched
P25398	40S ribosomal protein S12 [OS=Homo sapiens]	2.08233	2.04782	0.0278919	0.0557838	0.139459	Rejected	Enriched	Enriched
P23381	Tryptophan--tRNA ligase, cytoplasmic [OS=Homo sapiens]	2.46369	2.40759	0.0279459	0.0558919	0.13973	Rejected	Enriched	Enriched
Q8IY81	pre-rRNA processing protein FTSJ3 [OS=Homo sapiens]	2.10977	2.00774	0.028	0.056	0.14	Rejected	Enriched	Enriched
P45880-1	Isoform 1 of Voltage-dependent anion-selective channel protein 2 [OS=Homo sapiens]	1.93891	1.84807	0.0280541	0.0561081	0.14027	Rejected	Enriched	Enriched
Q13492-1	Phosphatidylinositol-binding clathrin assembly protein [OS=Homo sapiens]	1.27106	1.24686	0.0281081	0.0562162	0.140541	Rejected	Enriched	Enriched
Q9BXP5	serrate RNA effector molecule homolog [OS=Homo sapiens]	2.09654	1.97127	0.0281622	0.0563243	0.140811	Rejected	Enriched	Enriched
P52565-1	rho GDP-dissociation inhibitor 1 [OS=Homo sapiens]	2.08258	2.04779	0.0282162	0.0564324	0.141081	Rejected	Enriched	Enriched
O94992	Protein HEXIM1 [OS=Homo sapiens]	11.559	11.1077	0.0282703	0.0565405	0.141351	Rejected	Enriched	Enriched
P11908-2	Isoform 2 of Ribose-phosphate pyrophosphokinase 2 [OS=Homo sapiens]	2.3465	2.20185	0.0283243	0.0566486	0.141622	Rejected	Enriched	Enriched
Q14671-3	Isoform 3 of Pumilio homolog 1 [OS=Homo sapiens]	4.01595	3.95651	0.0283784	0.0567568	0.141892	Rejected	Enriched	Enriched
P48147	prolyl endopeptidase [OS=Homo sapiens]	8.78621	7.4151	0.0284324	0.0568649	0.142162	Rejected	Enriched	Enriched
O95865	N(G),N(G)-dimethylarginine dimethylaminohydrolase 2 [OS=Homo sapiens]	2.37533	1.91295	0.0284865	0.056973	0.142432	Rejected	Enriched	Enriched
P53992	Protein transport protein sec24c [OS=Homo sapiens]	1.75445	1.71465	0.0285405	0.0570811	0.142703	Rejected	Enriched	Enriched
P52434	DNA-directed RNA polymerases I, II, and III subunit RPABC3 [OS=Homo sapiens]	2.49974	2.4557	0.0285946	0.0571892	0.142973	Rejected	Enriched	Enriched
Q9H3P7	Golgi resident protein GCP60 [OS=Homo sapiens]	2.74812	2.66584	0.0286486	0.0572973	0.143243	Rejected	Enriched	Enriched
Q9BRX2	Protein pelota homolog [OS=Homo sapiens]	1.3122	1.29484	0.0287027	0.0574054	0.143514	Rejected	Enriched	Enriched
Q15050	Ribosome biogenesis regulatory protein homolog [OS=Homo sapiens]	1.72662	1.6779	0.0287568	0.0575135	0.143784	Rejected	Enriched	Enriched
P26358-2	Isoform 2 of DNA (cytosine-5)-methyltransferase 1 [OS=Homo sapiens]	2.57473	2.34349	0.0288108	0.0576216	0.144054	Rejected	Enriched	Enriched
P09493-3	Isoform 3 of Tropomyosin alpha-1 chain [OS=Homo sapiens]	3.32146	3.19485	0.0288649	0.0577297	0.144324	Rejected	Enriched	Enriched
Q9Y5B9	FACT complex subunit SPT16 [OS=Homo sapiens]	3.83552	3.74198	0.0289189	0.0578378	0.144595	Rejected	Enriched	Enriched
Q29RF7-1	Sister chromatid cohesion protein PDS5 homolog A [OS=Homo sapiens]	2.19593	2.08927	0.028973	0.0579459	0.144865	Rejected	Enriched	Enriched
Q9Y5X2	Sorting nexin-8 [OS=Homo sapiens]	1.23966	1.2211	0.029027	0.0580541	0.145135	Rejected	Enriched	Enriched
Q15005	Signal peptidase complex subunit 2 [OS=Homo sapiens]	1.18075	1.17104	0.0290811	0.0581622	0.145405	Rejected	Enriched	Enriched
P19338	Nucleolin [OS=Homo sapiens]	2.47913	2.38303	0.0291351	0.0582703	0.145676	Rejected	Enriched	Enriched
Q9Y520-7	Isoform 7 of Protein PRRC2C [OS=Homo sapiens]	2.1442	2.06898	0.0291892	0.0583784	0.145946	Rejected	Enriched	Enriched
Q9UDY2-7	Isoform 7 of Tight junction protein ZO-2 [OS=Homo sapiens]	1.49848	1.48178	0.0292432	0.0584865	0.146216	Rejected	Enriched	Enriched
Q8TAQ2	SWI/SNF complex subunit SMARCC2 [OS=Homo sapiens]	2.64143	2.60421	0.0292973	0.0585946	0.146486	Rejected	Enriched	Enriched
O14745	Na(+)/H(+) exchange regulatory cofactor NHE-RF1 [OS=Homo sapiens]	2.61775	2.56967	0.0293514	0.0587027	0.146757	Rejected	Enriched	Enriched
O00410-3	Isoform 3 of Importin-5 [OS=Homo sapiens]	3.7812	3.75315	0.0294054	0.0588108	0.147027	Rejected	Enriched	Enriched
P83731	60S ribosomal protein L24 [OS=Homo sapiens]	6.29437	6.22963	0.0294595	0.0589189	0.147297	Rejected	Enriched	Enriched
P52701	DNA mismatch repair protein MSH6 [OS=Homo sapiens]	2.91524	2.86707	0.0295135	0.059027	0.147568	Rejected	Enriched	Enriched
Q9BS26	Endoplasmic reticulum resident protein 44 [OS=Homo sapiens]	7.40776	7.32925	0.0295676	0.0591351	0.147838	Rejected	Enriched	Enriched
P54725-1	UV excision repair protein RAD23 homolog A [OS=Homo sapiens]	1.29919	1.28379	0.0296216	0.0592432	0.148108	Rejected	Enriched	Enriched
P23284	peptidyl-prolyl cis-trans isomerase B [OS=Homo sapiens]	2.35518	2.28614	0.0296757	0.0593514	0.148378	Rejected	Enriched	Enriched
Q16698	2,4-dienoyl-CoA reductase, mitochondrial [OS=Homo sapiens]	1.71197	1.70544	0.0297297	0.0594595	0.148649	Rejected	Enriched	Enriched
P67870	Casein kinase II subunit beta [OS=Homo sapiens]	1.21744	1.20899	0.0297838	0.0595676	0.148919	Rejected	Enriched	Enriched
P57740	Nuclear pore complex protein Nup107 [OS=Homo sapiens]	3.56495	3.53222	0.0298378	0.0596757	0.149189	Rejected	Enriched	Enriched
P12429	annexin A3 [OS=Homo sapiens]	7.53853	7.50922	0.0298919	0.0597838	0.149459	Rejected	Enriched	Enriched
P14678-3	Isoform SM-B1 of Small nuclear ribonucleoprotein-associated proteins B and B' [OS=Homo sapiens]	1.32917	1.32226	0.0299459	0.0598919	0.14973	Rejected	Enriched	Enriched
Q12931	heat shock protein 75 kDa, mitochondrial [OS=Homo sapiens]	2.76696	2.69729	0.03	0.06	0.15	Rejected	Enriched	Enriched
P21926	CD9 antigen [OS=Homo sapiens]	1.32053	1.30801	0.0300541	0.0601081	0.15027	Rejected	Enriched	Enriched
Q9P0L0	vesicle-associated membrane protein-associated protein A [OS=Homo sapiens]	1.46486	1.45319	0.0301081	0.0602162	0.150541	Rejected	Enriched	Enriched
O15479	Melanoma-associated antigen B2 [OS=Homo sapiens]	1.78083	1.76772	0.0301622	0.0603243	0.150811	Rejected	Enriched	Enriched
P28074-1	proteasome subunit beta type-5 [OS=Homo sapiens]	3.64211	3.5841	0.0302162	0.0604324	0.151081	Rejected	Enriched	Enriched
Q15631-1	Translin [OS=Homo sapiens]	1.65535	1.63788	0.0302703	0.0605405	0.151351	Rejected	Enriched	Enriched
P63220	40S ribosomal protein S21 [OS=Homo sapiens]	2.3004	2.28754	0.0303243	0.0606486	0.151622	Rejected	Enriched	Enriched
P60660	Myosin light polypeptide 6 [OS=Homo sapiens]	11.0974	10.9655	0.0303784	0.0607568	0.151892	Rejected	Enriched	Enriched
P62424	60S ribosomal protein L7a [OS=Homo sapiens]	1.37258	1.3609	0.0304324	0.0608649	0.152162	Rejected	Enriched	Enriched
Q9BYD3	39S ribosomal protein L4, mitochondrial [OS=Homo sapiens]	1.33588	1.3306	0.0304865	0.060973	0.152432	Rejected	Enriched	Enriched
O94903	Proline synthase co-transcribed bacterial homolog protein [OS=Homo sapiens]	2.67317	2.6089	0.0305405	0.0610811	0.152703	Rejected	Enriched	Enriched
P30046	D-dopachrome decarboxylase [OS=Homo sapiens]	1.75147	1.73749	0.0305946	0.0611892	0.152973	Rejected	Enriched	Enriched
P36871-1	Phosphoglucomutase-1 [OS=Homo sapiens]	2.60952	2.55611	0.0306486	0.0612973	0.153243	Rejected	Enriched	Enriched
Q99798	Aconitate hydratase, mitochondrial [OS=Homo sapiens]	2.36457	2.35525	0.0307027	0.0614054	0.153514	Rejected	Enriched	Enriched
Q14204	Cytoplasmic dynein 1 heavy chain 1 [OS=Homo sapiens]	4.54452	4.52487	0.0307568	0.0615135	0.153784	Rejected	Enriched	Enriched
Q9NUQ9	protein FAM49B [OS=Homo sapiens]	3.34878	3.34461	0.0308108	0.0616216	0.154054	Rejected	Enriched	Enriched
Q8WXH0-2	Isoform 2 of Nesprin-2 [OS=Homo sapiens]	1.27485	1.27247	0.0308649	0.0617297	0.154324	Rejected	Enriched	Enriched
Q9UNZ2-5	Isoform 3 of NSFL1 cofactor p47 [OS=Homo sapiens]	2.64999	2.62927	0.0309189	0.0618378	0.154595	Rejected	Enriched	Enriched
Q1KMD3	heterogeneous nuclear ribonucleoprotein U-like protein 2 [OS=Homo sapiens]	49.4773	49.0071	0.030973	0.0619459	0.154865	Rejected	Enriched	Enriched
Q8NHV4-3	Isoform 3 of Protein NEDD1 [OS=Homo sapiens]	1.57714	1.57378	0.031027	0.0620541	0.155135	Rejected	Enriched	Enriched
Q96EE3-1	Isoform B of Nucleoporin SEH1 [OS=Homo sapiens]	3.42612	3.4105	0.0310811	0.0621622	0.155405	Rejected	Enriched	Enriched
P61158	actin-related protein 3 [OS=Homo sapiens]	2.22146	2.21078	0.0311351	0.0622703	0.155676	Rejected	Enriched	Enriched
Q8WYP5-2	Isoform 2 of Protein ELYS [OS=Homo sapiens]	1.64023	1.63908	0.0311892	0.0623784	0.155946	Rejected	Enriched	Enriched
P62277	40S ribosomal protein S13 [OS=Homo sapiens]	2.1143	2.11378	0.0312432	0.0624865	0.156216	Rejected	Enriched	Enriched
P16949-2	Isoform 2 of Stathmin [OS=Homo sapiens]	3.25154	3.24678	0.0312973	0.0625946	0.156486	Rejected	Enriched	Enriched
P43243	Matrin-3 [OS=Homo sapiens]	3.34657	3.37294	0.0313514	0.0627027	0.156757	Rejected	Enriched	Enriched
P50897	Palmitoyl-protein thioesterase 1 [OS=Homo sapiens]	2.44247	2.44326	0.0314054	0.0628108	0.157027	Rejected	Enriched	Enriched
P22392-2	Isoform 3 of Nucleoside diphosphate kinase B [OS=Homo sapiens]	1.23711	1.23769	0.0314595	0.0629189	0.157297	Rejected	Enriched	Enriched
P20618	proteasome subunit beta type-1 [OS=Homo sapiens]	2.07841	2.10476	0.0315135	0.063027	0.157568	Rejected	Enriched	Enriched
Q06210-1	glutamine--fructose-6-phosphate aminotransferase [isomerizing] 1 [OS=Homo sapiens]	1.81266	1.81784	0.0315676	0.0631351	0.157838	Rejected	Enriched	Enriched
P41252	isoleucine--tRNA ligase, cytoplasmic [OS=Homo sapiens]	1.86969	1.87774	0.0316216	0.0632432	0.158108	Rejected	Enriched	Enriched
Q99829	Copine-1 [OS=Homo sapiens]	4.20606	4.21849	0.0316757	0.0633514	0.158378	Rejected	Enriched	Enriched
Q6PJT7-1	Zinc finger CCCH domain-containing protein 14 [OS=Homo sapiens]	1.36927	1.37443	0.0317297	0.0634595	0.158649	Rejected	Enriched	Enriched
P20073-1	Annexin A7 [OS=Homo sapiens]	1.81757	1.83273	0.0317838	0.0635676	0.158919	Rejected	Enriched	Enriched
Q9UHV9	Prefoldin subunit 2 [OS=Homo sapiens]	1.62303	1.62598	0.0318378	0.0636757	0.159189	Rejected	Enriched	Enriched
A5YKK6	CCR4-NOT transcription complex subunit 1 [OS=Homo sapiens]	1.75572	1.77232	0.0318919	0.0637838	0.159459	Rejected	Enriched	Enriched
Q8NBT2	kinetochore protein SPC24 [OS=Homo sapiens]	8.3613	8.38156	0.0319459	0.0638919	0.15973	Rejected	Enriched	Enriched
Q9H845	Acyl-CoA dehydrogenase family member 9, mitochondrial [OS=Homo sapiens]	2.18432	2.19276	0.032	0.064	0.16	Rejected	Enriched	Enriched
P78527	DNA-dependent protein kinase catalytic subunit [OS=Homo sapiens]	2.26014	2.29561	0.0320541	0.0641081	0.16027	Rejected	Enriched	Enriched
P17174	Aspartate aminotransferase, cytoplasmic [OS=Homo sapiens]	2.44201	2.4825	0.0321081	0.0642162	0.160541	Rejected	Enriched	Enriched
P10768	S-formylglutathione hydrolase [OS=Homo sapiens]	2.91798	2.94272	0.0321622	0.0643243	0.160811	Rejected	Enriched	Enriched
O00213	Amyloid beta A4 precursor protein-binding family B member 1 [OS=Homo sapiens]	2.06823	2.12681	0.0322162	0.0644324	0.161081	Rejected	Enriched	Enriched
Q8N163-1	Cell cycle and apoptosis regulator protein 2 [OS=Homo sapiens]	4.14322	4.2904	0.0322703	0.0645405	0.161351	Rejected	Enriched	Enriched
Q3LXA3	Triokinase/FMN cyclase [OS=Homo sapiens]	1.16872	1.1724	0.0323243	0.0646486	0.161622	Rejected	Enriched	Enriched
Q9NQW6	actin-binding protein anillin [OS=Homo sapiens]	2.79652	2.87192	0.0323784	0.0647568	0.161892	Rejected	Enriched	Enriched
Q96HS1-1	Serine/threonine-protein phosphatase Pgam5, mitochondrial [OS=Homo sapiens]	2.50709	2.51577	0.0324324	0.0648649	0.162162	Rejected	Enriched	Enriched
Q9H7Z7	Prostaglandin E synthase 2 [OS=Homo sapiens]	1.36647	1.3736	0.0324865	0.064973	0.162432	Rejected	Enriched	Enriched
O43765	Small glutamine-rich tetratricopeptide repeat-containing protein alpha [OS=Homo sapiens]	2.15313	2.17384	0.0325405	0.0650811	0.162703	Rejected	Enriched	Enriched
Q9NSD9	Phenylalanine--tRNA ligase beta subunit [OS=Homo sapiens]	2.48272	2.54489	0.0325946	0.0651892	0.162973	Rejected	Enriched	Enriched
Q9NTK5-1	obg-like ATPase 1 [OS=Homo sapiens]	1.65088	1.67615	0.0326486	0.0652973	0.163243	Rejected	Enriched	Enriched
P00387-3	Isoform 3 of NADH-cytochrome b5 reductase 3 [OS=Homo sapiens]	2.86231	2.98826	0.0327027	0.0654054	0.163514	Rejected	Enriched	Enriched
Q6DD88	Atlastin-3 [OS=Homo sapiens]	1.45164	1.46485	0.0327568	0.0655135	0.163784	Rejected	Enriched	Enriched
Q5QJE6	Deoxynucleotidyltransferase terminal-interacting protein 2 [OS=Homo sapiens]	2.02379	2.08612	0.0328108	0.0656216	0.164054	Rejected	Enriched	Enriched
P10515	Dihydrolipoyllysine-residue acetyltransferase component of pyruvate dehydrogenase complex, mitochondrial [OS=Homo sapiens]	2.85896	2.9438	0.0328649	0.0657297	0.164324	Rejected	Enriched	Enriched
P14868	Aspartate--tRNA ligase, cytoplasmic [OS=Homo sapiens]	2.51052	2.56043	0.0329189	0.0658378	0.164595	Rejected	Enriched	Enriched
Q9NZM1	Myoferlin [OS=Homo sapiens]	1.21187	1.22229	0.032973	0.0659459	0.164865	Rejected	Enriched	Enriched
O00231-2	Isoform 2 of 26S proteasome non-ATPase regulatory subunit 11 [OS=Homo sapiens]	1.76286	1.8227	0.033027	0.0660541	0.165135	Rejected	Enriched	Enriched
Q9NS86	lanC-like protein 2 [OS=Homo sapiens]	1.2253	1.23498	0.0330811	0.0661622	0.165405	Rejected	Enriched	Enriched
O43488	aflatoxin B1 aldehyde reductase member 2 [OS=Homo sapiens]	1.20966	1.2221	0.0331351	0.0662703	0.165676	Rejected	Enriched	Enriched
Q15392	Delta(24)-sterol reductase [OS=Homo sapiens]	1.22738	1.24145	0.0331892	0.0663784	0.165946	Rejected	Enriched	Enriched
Q96M27-2	Isoform 2 of Protein PRRC1 [OS=Homo sapiens]	1.59229	1.61507	0.0332432	0.0664865	0.166216	Rejected	Enriched	Enriched
P12268	inosine-5'-monophosphate dehydrogenase 2 [OS=Homo sapiens]	4.35655	4.43861	0.0332973	0.0665946	0.166486	Rejected	Enriched	Enriched
Q99459	Cell division cycle 5-like protein [OS=Homo sapiens]	1.99152	2.05675	0.0333514	0.0667027	0.166757	Rejected	Enriched	Enriched
Q8WXF1	Paraspeckle component 1 [OS=Homo sapiens]	1.6196	1.64389	0.0334054	0.0668108	0.167027	Rejected	Enriched	Enriched
Q86V81	THO complex subunit 4 [OS=Homo sapiens]	1.61279	1.63934	0.0334595	0.0669189	0.167297	Rejected	Enriched	Enriched
P49770	Translation initiation factor eIF-2B subunit beta [OS=Homo sapiens]	3.4023	3.49631	0.0335135	0.067027	0.167568	Rejected	Enriched	Enriched
Q8WVJ2	NudC domain-containing protein 2 [OS=Homo sapiens]	1.59107	1.62514	0.0335676	0.0671351	0.167838	Rejected	Enriched	Enriched
P09874	Poly [ADP-ribose] polymerase 1 [OS=Homo sapiens]	2.16721	2.27679	0.0336216	0.0672432	0.168108	Rejected	Enriched	Enriched
P62241	40S ribosomal protein S8 [OS=Homo sapiens]	7.61388	8.00759	0.0336757	0.0673514	0.168378	Rejected	Enriched	Enriched
O75844	caax prenyl protease 1 homolog [OS=Homo sapiens]	1.20761	1.21771	0.0337297	0.0674595	0.168649	Rejected	Enriched	Enriched
O75390	citrate synthase, mitochondrial [OS=Homo sapiens]	10.5354	11.2039	0.0337838	0.0675676	0.168919	Rejected	Enriched	Enriched
P62140	Serine/threonine-protein phosphatase PP1-beta catalytic subunit [OS=Homo sapiens]	1.9757	2.00032	0.0338378	0.0676757	0.169189	Rejected	Enriched	Enriched
Q9UBB4-1	Ataxin-10 [OS=Homo sapiens]	1.16161	1.16697	0.0338919	0.0677838	0.169459	Rejected	Enriched	Enriched
P04080	Cystatin-B [OS=Homo sapiens]	1.23147	1.24947	0.0339459	0.0678919	0.16973	Rejected	Enriched	Enriched
Q05639	Elongation factor 1-alpha 2 [OS=Homo sapiens]	4.64393	4.69484	0.034	0.068	0.17	Rejected	Enriched	Enriched
Q9NQX3-2	Isoform 2 of Gephyrin [OS=Homo sapiens]	2.13399	2.23294	0.0340541	0.0681081	0.17027	Rejected	Enriched	Enriched
P27824-2	Isoform 2 of Calnexin [OS=Homo sapiens]	4.01115	4.17398	0.0341081	0.0682162	0.170541	Rejected	Enriched	Enriched
P29144	Tripeptidyl-peptidase 2 [OS=Homo sapiens]	1.1804	1.20044	0.0341622	0.0683243	0.170811	Rejected	Enriched	Enriched
Q15021	condensin complex subunit 1 [OS=Homo sapiens]	2.12815	2.20132	0.0342162	0.0684324	0.171081	Rejected	Enriched	Enriched
Q15181	Inorganic pyrophosphatase [OS=Homo sapiens]	2.21623	2.33617	0.0342703	0.0685405	0.171351	Rejected	Enriched	Enriched
P29401-2	Isoform 2 of Transketolase [OS=Homo sapiens]	1.95877	2.03279	0.0343243	0.0686486	0.171622	Rejected	Enriched	Enriched
P48449-1	lanosterol synthase [OS=Homo sapiens]	3.15531	3.29402	0.0343784	0.0687568	0.171892	Rejected	Enriched	Enriched
Q9NR12-1	PDZ and LIM domain protein 7 [OS=Homo sapiens]	1.64295	1.66889	0.0344324	0.0688649	0.172162	Rejected	Enriched	Enriched
P11476-1	Ras-related protein Rab-1A [OS=Homo sapiens]	2.84116	3.04011	0.0344865	0.068973	0.172432	Rejected	Enriched	Enriched
Q01813	ATP-dependent 6-phosphofructokinase, platelet type [OS=Homo sapiens]	2.34246	2.50474	0.0345405	0.0690811	0.172703	Rejected	Enriched	Enriched
P43490	nicotinamide phosphoribosyltransferase [OS=Homo sapiens]	1.2455	1.27014	0.0345946	0.0691892	0.172973	Rejected	Enriched	Enriched
P14324	Farnesyl pyrophosphate synthase [OS=Homo sapiens]	1.22299	1.25575	0.0346486	0.0692973	0.173243	Rejected	Enriched	Enriched
P04632	Calpain small subunit 1 [OS=Homo sapiens]	2.12322	2.22308	0.0347027	0.0694054	0.173514	Rejected	Enriched	Enriched
P41091	eukaryotic translation initiation factor 2 subunit 3 [OS=Homo sapiens]	1.63945	1.75182	0.0347568	0.0695135	0.173784	Rejected	Enriched	Enriched
Q15517	corneodesmosin [OS=Homo sapiens]	3.29044	3.41706	0.0348108	0.0696216	0.174054	Rejected	Enriched	Enriched
Q9BPX3	Condensin complex subunit 3 [OS=Homo sapiens]	1.17221	1.19281	0.0348649	0.0697297	0.174324	Rejected	Enriched	Enriched
Q06203	amidophosphoribosyltransferase [OS=Homo sapiens]	3.45169	3.75313	0.0349189	0.0698378	0.174595	Rejected	Enriched	Enriched
P15374	Ubiquitin carboxyl-terminal hydrolase isozyme L3 [OS=Homo sapiens]	2.36546	2.39611	0.034973	0.0699459	0.174865	Rejected	Enriched	Enriched
P07814	Bifunctional glutamate/proline--tRNA ligase [OS=Homo sapiens]	3.1734	3.409	0.035027	0.0700541	0.175135	Rejected	Enriched	Enriched
Q96N66-1	Lysophospholipid acyltransferase 7 [OS=Homo sapiens]	1.49638	1.56171	0.0350811	0.0701622	0.175405	Rejected	Enriched	Enriched
P35998	26S protease regulatory subunit 7 [OS=Homo sapiens]	1.61703	1.6993	0.0351351	0.0702703	0.175676	Rejected	Enriched	Enriched
Q13526	peptidyl-prolyl cis-trans isomerase NIMA-interacting 1 [OS=Homo sapiens]	6.82195	7.07724	0.0351892	0.0703784	0.175946	Rejected	Enriched	Enriched
Q9UQ80	proliferation-associated protein 2G4 [OS=Homo sapiens]	3.30631	3.55379	0.0352432	0.0704865	0.176216	Rejected	Rejected	Enriched
Q96T88-2	Isoform 2 of E3 ubiquitin-protein ligase UHRF1 [OS=Homo sapiens]	2.36497	2.50065	0.0352973	0.0705946	0.176486	Rejected	Rejected	Enriched
P60033	CD81 antigen [OS=Homo sapiens]	2.1935	2.2527	0.0353514	0.0707027	0.176757	Rejected	Rejected	Enriched
Q15185	Prostaglandin E synthase 3 [OS=Homo sapiens]	1.42077	1.46546	0.0354054	0.0708108	0.177027	Rejected	Rejected	Enriched
Q07021	Complement component 1 Q subcomponent-binding protein, mitochondrial [OS=Homo sapiens]	1.21127	1.2467	0.0354595	0.0709189	0.177297	Rejected	Rejected	Enriched
Q96QA5	gasdermin-A [OS=Homo sapiens]	1.80171	1.92169	0.0355135	0.071027	0.177568	Rejected	Rejected	Enriched
P18206	Vinculin [OS=Homo sapiens]	1.59121	1.65716	0.0355676	0.0711351	0.177838	Rejected	Rejected	Enriched
P04844-1	Dolichyl-diphosphooligosaccharide--protein glycosyltransferase subunit 2 [OS=Homo sapiens]	2.69061	2.76437	0.0356216	0.0712432	0.178108	Rejected	Rejected	Enriched
P22532	small proline-rich protein 2D [OS=Homo sapiens]	3.84001	4.06641	0.0356757	0.0713514	0.178378	Rejected	Rejected	Enriched
Q9UKZ1	CCR4-NOT transcription complex subunit 11 [OS=Homo sapiens]	1.41285	1.47975	0.0357297	0.0714595	0.178649	Rejected	Rejected	Enriched
Q96QR8	Transcriptional activator protein Pur-beta [OS=Homo sapiens]	2.02421	2.0921	0.0357838	0.0715676	0.178919	Rejected	Rejected	Enriched
Q14696	LDLR chaperone MESD [OS=Homo sapiens]	1.2065	1.24408	0.0358378	0.0716757	0.179189	Rejected	Rejected	Enriched
Q9BSJ8-2	Isoform 2 of Extended synaptotagmin-1 [OS=Homo sapiens]	4.54468	4.75961	0.0358919	0.0717838	0.179459	Rejected	Rejected	Enriched
Q96AY3	Peptidyl-prolyl cis-trans isomerase FKBP10 [OS=Homo sapiens]	1.57963	1.64863	0.0359459	0.0718919	0.17973	Rejected	Rejected	Enriched
Q92783	signal transducing adapter molecule 1 [OS=Homo sapiens]	1.21727	1.24431	0.036	0.072	0.18	Rejected	Rejected	Enriched
Q15004-1	PCNA-associated factor [OS=Homo sapiens]	25.8116	27.6812	0.0360541	0.0721081	0.18027	Rejected	Rejected	Enriched
Q07666	KH domain-containing, RNA-binding, signal transduction-associated protein 1 [OS=Homo sapiens]	1.604	1.66941	0.0361081	0.0722162	0.180541	Rejected	Rejected	Enriched
O43290	U4/U6.U5 tri-snRNP-associated protein 1 [OS=Homo sapiens]	2.989	3.10728	0.0361622	0.0723243	0.180811	Rejected	Rejected	Enriched
O76071	Probable cytosolic iron-sulfur protein assembly protein Ciao1 [OS=Homo sapiens]	1.22338	1.25387	0.0362162	0.0724324	0.181081	Rejected	Rejected	Enriched
Q00341-1	Vigilin [OS=Homo sapiens]	1.43997	1.49302	0.0362703	0.0725405	0.181351	Rejected	Rejected	Enriched
Q9Y281-1	Cofilin-2 [OS=Homo sapiens]	3.77084	4.1342	0.0363243	0.0726486	0.181622	Rejected	Rejected	Enriched
Q15257-1	Serine/threonine-protein phosphatase 2A activator [OS=Homo sapiens]	2.24646	2.5509	0.0363784	0.0727568	0.181892	Rejected	Rejected	Enriched
Q9BT78	COP9 signalosome complex subunit 4 [OS=Homo sapiens]	1.7212	1.82148	0.0364324	0.0728649	0.182162	Rejected	Rejected	Enriched
Q5TFE4	5'-nucleotidase domain-containing protein 1 [OS=Homo sapiens]	1.46074	1.54427	0.0364865	0.072973	0.182432	Rejected	Rejected	Enriched
Q9P013	spliceosome-associated protein CWC15 homolog [OS=Homo sapiens]	1.18327	1.21352	0.0365405	0.0730811	0.182703	Rejected	Rejected	Enriched
Q3KQU3	MAP7 domain-containing protein 1 [OS=Homo sapiens]	1.39294	1.43085	0.0365946	0.0731892	0.182973	Rejected	Rejected	Enriched
Q16401	26S proteasome non-ATPase regulatory subunit 5 [OS=Homo sapiens]	1.22034	1.25103	0.0366486	0.0732973	0.183243	Rejected	Rejected	Enriched
P36542-1	ATP synthase subunit gamma, mitochondrial [OS=Homo sapiens]	4.1462	4.55219	0.0367027	0.0734054	0.183514	Rejected	Rejected	Enriched
P31040	Succinate dehydrogenase [ubiquinone] flavoprotein subunit, mitochondrial [OS=Homo sapiens]	3.47652	3.8618	0.0367568	0.0735135	0.183784	Rejected	Rejected	Enriched
Q96KB5-2	Isoform 2 of Lymphokine-activated killer T-cell-originated protein kinase [OS=Homo sapiens]	1.22148	1.27	0.0368108	0.0736216	0.184054	Rejected	Rejected	Enriched
P47985	cytochrome b-c1 complex subunit Rieske, mitochondrial [OS=Homo sapiens]	1.14274	1.16595	0.0368649	0.0737297	0.184324	Rejected	Rejected	Enriched
Q9Y3D0	Mitotic spindle-associated MMXD complex subunit MIP18 [OS=Homo sapiens]	1.48237	1.51828	0.0369189	0.0738378	0.184595	Rejected	Rejected	Enriched
Q08554-1	Desmocollin-1 [OS=Homo sapiens]	2.36313	2.56356	0.036973	0.0739459	0.184865	Rejected	Rejected	Enriched
O14578-4	Isoform 4 of Citron Rho-interacting kinase [OS=Homo sapiens]	2.17182	2.25585	0.037027	0.0740541	0.185135	Rejected	Rejected	Enriched
O14777	Kinetochore protein NDC80 homolog [OS=Homo sapiens]	14.8892	15.4297	0.0370811	0.0741622	0.185405	Rejected	Rejected	Enriched
Q9UNH7-1	Sorting nexin-6 [OS=Homo sapiens]	99.3377	104.126	0.0371351	0.0742703	0.185676	Rejected	Rejected	Enriched
O60563	Cyclin-T1 [OS=Homo sapiens]	1.39572	1.44258	0.0371892	0.0743784	0.185946	Rejected	Rejected	Enriched
P15121	aldose reductase [OS=Homo sapiens]	2.35044	2.49378	0.0372432	0.0744865	0.186216	Rejected	Rejected	Enriched
O00264	Membrane-associated progesterone receptor component 1 [OS=Homo sapiens]	1.40303	1.50179	0.0372973	0.0745946	0.186486	Rejected	Rejected	Enriched
Q9UHG3	prenylcysteine oxidase 1 [OS=Homo sapiens]	1.21717	1.25509	0.0373514	0.0747027	0.186757	Rejected	Rejected	Enriched
P35241-5	Isoform 5 of Radixin [OS=Homo sapiens]	1.72313	1.80665	0.0374054	0.0748108	0.187027	Rejected	Rejected	Enriched
Q6YN16	Hydroxysteroid dehydrogenase-like protein 2 [OS=Homo sapiens]	1.34078	1.4147	0.0374595	0.0749189	0.187297	Rejected	Rejected	Enriched
P30043	flavin reductase (NADPH) [OS=Homo sapiens]	1.56953	1.6641	0.0375135	0.075027	0.187568	Rejected	Rejected	Enriched
P23490	loricrin [OS=Homo sapiens]	5.91945	6.49038	0.0375676	0.0751351	0.187838	Rejected	Rejected	Enriched
Q9BUJ2-1	Heterogeneous nuclear ribonucleoprotein U-like protein 1 [OS=Homo sapiens]	4.39604	4.69806	0.0376216	0.0752432	0.188108	Rejected	Rejected	Enriched
Q9Y6H1	Coiled-coil-helix-coiled-coil-helix domain-containing protein 2 [OS=Homo sapiens]	1.15889	1.19388	0.0376757	0.0753514	0.188378	Rejected	Rejected	Enriched
Q9BTW9-4	Isoform 4 of Tubulin-specific chaperone D [OS=Homo sapiens]	1.59552	1.78384	0.0377297	0.0754595	0.188649	Rejected	Rejected	Enriched
O15355	Protein phosphatase 1G [OS=Homo sapiens]	2.40358	2.48721	0.0377838	0.0755676	0.188919	Rejected	Rejected	Enriched
P62888	60S ribosomal protein L30 [OS=Homo sapiens]	10.0528	10.8745	0.0378378	0.0756757	0.189189	Rejected	Rejected	Enriched
Q7LBR1	Charged multivesicular body protein 1b [OS=Homo sapiens]	32.8849	34.0577	0.0378919	0.0757838	0.189459	Rejected	Rejected	Enriched
Q00059	Transcription factor A, mitochondrial [OS=Homo sapiens]	3.59283	3.8338	0.0379459	0.0758919	0.18973	Rejected	Rejected	Enriched
P13489	Ribonuclease inhibitor [OS=Homo sapiens]	3.16126	3.4437	0.038	0.076	0.19	Rejected	Rejected	Enriched
O43747-2	Isoform 2 of AP-1 complex subunit gamma-1 [OS=Homo sapiens]	2.05766	2.23443	0.0380541	0.0761081	0.19027	Rejected	Rejected	Enriched
P39656	Dolichyl-diphosphooligosaccharide--protein glycosyltransferase 48 kDa subunit [OS=Homo sapiens]	2.18392	2.32546	0.0381081	0.0762162	0.190541	Rejected	Rejected	Enriched
Q96R06	Sperm-associated antigen 5 [OS=Homo sapiens]	1.23367	1.28291	0.0381622	0.0763243	0.190811	Rejected	Rejected	Enriched
P50895	Basal cell adhesion molecule [OS=Homo sapiens]	2.04067	2.10112	0.0382162	0.0764324	0.191081	Rejected	Rejected	Enriched
Q6KB66-3	Isoform 3 of Keratin, type II cytoskeletal 80 [OS=Homo sapiens]	1.86082	2.16338	0.0382703	0.0765405	0.191351	Rejected	Rejected	Enriched
Q9P270	SLAIN motif-containing protein 2 [OS=Homo sapiens]	1.24183	1.31183	0.0383243	0.0766486	0.191622	Rejected	Rejected	Enriched
Q9NY12-1	H/ACA ribonucleoprotein complex subunit 1 [OS=Homo sapiens]	1.16188	1.21067	0.0383784	0.0767568	0.191892	Rejected	Rejected	Enriched
Q99961	Endophilin-A2 [OS=Homo sapiens]	1.19922	1.25238	0.0384324	0.0768649	0.192162	Rejected	Rejected	Enriched
P60891	ribose-phosphate pyrophosphokinase 1 [OS=Homo sapiens]	1.24617	1.32261	0.0384865	0.076973	0.192432	Rejected	Rejected	Enriched
P09622	Dihydrolipoyl dehydrogenase, mitochondrial [OS=Homo sapiens]	2.0557	2.21328	0.0385405	0.0770811	0.192703	Rejected	Rejected	Enriched
P60900	Proteasome subunit alpha type-6 [OS=Homo sapiens]	2.73332	3.42302	0.0385946	0.0771892	0.192973	Rejected	Rejected	Enriched
Q6ZSR9	Uncharacterized protein FLJ45252 [OS=Homo sapiens]	1.82915	2.1749	0.0386486	0.0772973	0.193243	Rejected	Rejected	Enriched
O00487	26S proteasome non-ATPase regulatory subunit 14 [OS=Homo sapiens]	1.90997	2.1393	0.0387027	0.0774054	0.193514	Rejected	Rejected	Enriched
O94905-1	Erlin-2 [OS=Homo sapiens]	3.76817	4.12469	0.0387568	0.0775135	0.193784	Rejected	Rejected	Enriched
P07384	Calpain-1 catalytic subunit [OS=Homo sapiens]	4.82225	5.69957	0.0388108	0.0776216	0.194054	Rejected	Rejected	Enriched
Q12996-1	Cleavage stimulation factor subunit 3 [OS=Homo sapiens]	1.20578	1.25931	0.0388649	0.0777297	0.194324	Rejected	Rejected	Enriched
P29317	Ephrin type-A receptor 2 [OS=Homo sapiens]	1.60422	1.77529	0.0389189	0.0778378	0.194595	Rejected	Rejected	Enriched
P11766	alcohol dehydrogenase class-3 [OS=Homo sapiens]	1.75747	2.03001	0.038973	0.0779459	0.194865	Rejected	Rejected	Enriched
P36639	7,8-dihydro-8-oxoguanine triphosphatase [OS=Homo sapiens]	1.17999	1.22712	0.039027	0.0780541	0.195135	Rejected	Rejected	Enriched
Q13867	bleomycin hydrolase [OS=Homo sapiens]	2.04517	2.29247	0.0390811	0.0781622	0.195405	Rejected	Rejected	Enriched
P54577	Tyrosine--tRNA ligase, cytoplasmic [OS=Homo sapiens]	1.78383	2.13655	0.0391351	0.0782703	0.195676	Rejected	Rejected	Enriched
P61254	60S ribosomal protein L26 [OS=Homo sapiens]	1.50411	1.63056	0.0391892	0.0783784	0.195946	Rejected	Rejected	Enriched
P25787	Proteasome subunit alpha type-2 [OS=Homo sapiens]	5.04461	5.87752	0.0392432	0.0784865	0.196216	Rejected	Rejected	Enriched
Q5JTH9-1	RRP12-like protein [OS=Homo sapiens]	3.07962	3.47741	0.0392973	0.0785946	0.196486	Rejected	Rejected	Enriched
Q7L1Q6-3	Isoform 3 of Basic leucine zipper and W2 domain-containing protein 1 [OS=Homo sapiens]	1.79401	2.06488	0.0393514	0.0787027	0.196757	Rejected	Rejected	Enriched
Q01081	Splicing factor U2AF 35 kDa subunit [OS=Homo sapiens]	2.7442	3.05657	0.0394054	0.0788108	0.197027	Rejected	Rejected	Enriched
O75607	Nucleoplasmin-3 [OS=Homo sapiens]	1.5858	1.78559	0.0394595	0.0789189	0.197297	Rejected	Rejected	Enriched
P35754	Glutaredoxin-1 [OS=Homo sapiens]	1.1763	1.22734	0.0395135	0.079027	0.197568	Rejected	Rejected	Enriched
P14635	G2/mitotic-specific cyclin-B1 [OS=Homo sapiens]	1.47432	1.56482	0.0395676	0.0791351	0.197838	Rejected	Rejected	Enriched
Q15006	ER membrane protein complex subunit 2 [OS=Homo sapiens]	12.7913	14.2451	0.0396216	0.0792432	0.198108	Rejected	Rejected	Enriched
Q14966-1	Zinc finger protein 638 [OS=Homo sapiens]	1.19573	1.25042	0.0396757	0.0793514	0.198378	Rejected	Rejected	Enriched
O75821	Eukaryotic translation initiation factor 3 subunit G [OS=Homo sapiens]	1.31706	1.44782	0.0397297	0.0794595	0.198649	Rejected	Rejected	Enriched
Q562R1	Beta-actin-like protein 2 [OS=Homo sapiens]	1.20738	1.27793	0.0397838	0.0795676	0.198919	Rejected	Rejected	Enriched
Q7Z5K2-3	Isoform 3 of Wings apart-like protein homolog [OS=Homo sapiens]	1.17205	1.23514	0.0398378	0.0796757	0.199189	Rejected	Rejected	Enriched
Q16822-1	Phosphoenolpyruvate carboxykinase [GTP], mitochondrial [OS=Homo sapiens]	2.77478	3.26529	0.0398919	0.0797838	0.199459	Rejected	Rejected	Enriched
Q9UI26-2	Isoform 2 of Importin-11 [OS=Homo sapiens]	2.20521	2.69188	0.0399459	0.0798919	0.19973	Rejected	Rejected	Enriched
O14964	Hepatocyte growth factor-regulated tyrosine kinase substrate [OS=Homo sapiens]	3.57424	3.84827	0.04	0.08	0.2	Rejected	Rejected	Enriched
Q9NZL4-3	Isoform 3 of Hsp70-binding protein 1 [OS=Homo sapiens]	1.1972	1.26533	0.0400541	0.0801081	0.20027	Rejected	Rejected	Enriched
Q08209-1	Serine/threonine-protein phosphatase 2B catalytic subunit alpha isoform [OS=Homo sapiens]	5.00836	5.2896	0.0401081	0.0802162	0.200541	Rejected	Rejected	Enriched
Q96A72	protein mago nashi homolog 2 [OS=Homo sapiens]	3.84145	4.37469	0.0401622	0.0803243	0.200811	Rejected	Rejected	Enriched
P09429	High mobility group protein B1 [OS=Homo sapiens]	2.24304	2.67227	0.0402162	0.0804324	0.201081	Rejected	Rejected	Enriched
P49773	Histidine triad nucleotide-binding protein 1 [OS=Homo sapiens]	1.59062	1.78187	0.0402703	0.0805405	0.201351	Rejected	Rejected	Enriched
O14818-1	Proteasome subunit alpha type-7 [OS=Homo sapiens]	2.36224	2.44446	0.0403243	0.0806486	0.201622	Rejected	Rejected	Enriched
O15511-1	Actin-related protein 2/3 complex subunit 5 [OS=Homo sapiens]	5.86387	6.91546	0.0403784	0.0807568	0.201892	Rejected	Rejected	Enriched
Q32P28-3	Isoform 3 of Prolyl 3-hydroxylase 1 [OS=Homo sapiens]	1.15705	1.20654	0.0404324	0.0808649	0.202162	Rejected	Rejected	Enriched
P13804-1	Electron transfer flavoprotein subunit alpha, mitochondrial [OS=Homo sapiens]	2.15265	2.28226	0.0404865	0.080973	0.202432	Rejected	Rejected	Enriched
Q07866-9	Isoform I of Kinesin light chain 1 [OS=Homo sapiens]	1.4913	1.68681	0.0405405	0.0810811	0.202703	Rejected	Rejected	Enriched
Q86XZ4	Spermatogenesis-associated serine-rich protein 2 [OS=Homo sapiens]	1.18664	1.25431	0.0405946	0.0811892	0.202973	Rejected	Rejected	Enriched
Q9Y5M8	signal recognition particle receptor subunit beta [OS=Homo sapiens]	2.04373	2.16234	0.0406486	0.0812973	0.203243	Rejected	Rejected	Enriched
Q9UBU9-1	nuclear RNA export factor 1 [OS=Homo sapiens]	1.1309	1.16949	0.0407027	0.0814054	0.203514	Rejected	Rejected	Enriched
P25788-1	Proteasome subunit alpha type-3 [OS=Homo sapiens]	1.43371	1.61309	0.0407568	0.0815135	0.203784	Rejected	Rejected	Enriched
Q10567-3	Isoform C of AP-1 complex subunit beta-1 [OS=Homo sapiens]	1.2441	1.326	0.0408108	0.0816216	0.204054	Rejected	Rejected	Enriched
Q13813	Spectrin alpha chain, non-erythrocytic 1 [OS=Homo sapiens]	2.61865	2.955	0.0408649	0.0817297	0.204324	Rejected	Rejected	Enriched
Q9H2G2-1	STE20-like serine/threonine-protein kinase [OS=Homo sapiens]	1.26956	1.34734	0.0409189	0.0818378	0.204595	Rejected	Rejected	Enriched
Q96AT9	ribulose-phosphate 3-epimerase [OS=Homo sapiens]	1.16874	1.24566	0.040973	0.0819459	0.204865	Rejected	Rejected	Enriched
Q12874	splicing factor 3a subunit 3 [OS=Homo sapiens]	2.51983	3.21961	0.041027	0.0820541	0.205135	Rejected	Rejected	Enriched
P06132	Uroporphyrinogen decarboxylase [OS=Homo sapiens]	1.17495	1.22993	0.0410811	0.0821622	0.205405	Rejected	Rejected	Enriched
P49591	Serine--tRNA ligase, cytoplasmic [OS=Homo sapiens]	1.57897	1.68147	0.0411351	0.0822703	0.205676	Rejected	Rejected	Enriched
Q14444-1	Caprin-1 [OS=Homo sapiens]	1.78074	2.1391	0.0411892	0.0823784	0.205946	Rejected	Rejected	Enriched
Q9Y6C9	Mitochondrial carrier homolog 2 [OS=Homo sapiens]	1.79598	2.33295	0.0412432	0.0824865	0.206216	Rejected	Rejected	Enriched
Q99873	protein arginine N-methyltransferase 1 [OS=Homo sapiens]	4.88211	6.17931	0.0412973	0.0825946	0.206486	Rejected	Rejected	Enriched
P08865	40S ribosomal protein SA [OS=Homo sapiens]	2.43278	2.53875	0.0413514	0.0827027	0.206757	Rejected	Rejected	Enriched
Q16763	ubiquitin-conjugating enzyme E2 S [OS=Homo sapiens]	1.27352	1.35319	0.0414054	0.0828108	0.207027	Rejected	Rejected	Enriched
Q9Y2J2-2	Isoform 2 of Band 4.1-like protein 3 [OS=Homo sapiens]	1.41176	1.60233	0.0414595	0.0829189	0.207297	Rejected	Rejected	Enriched
P40222	alpha-taxilin [OS=Homo sapiens]	1.49918	1.72884	0.0415135	0.083027	0.207568	Rejected	Rejected	Enriched
Q9UHY7	Enolase-phosphatase E1 [OS=Homo sapiens]	1.5694	1.69904	0.0415676	0.0831351	0.207838	Rejected	Rejected	Enriched
Q9BX68	Histidine triad nucleotide-binding protein 2, mitochondrial [OS=Homo sapiens]	1.16628	1.23453	0.0416216	0.0832432	0.208108	Rejected	Rejected	Enriched
Q9UHI6	Probable ATP-dependent RNA helicase DDX20 [OS=Homo sapiens]	1.29256	1.41434	0.0416757	0.0833514	0.208378	Rejected	Rejected	Enriched
P11216	Glycogen phosphorylase, brain form [OS=Homo sapiens]	1.17181	1.24205	0.0417297	0.0834595	0.208649	Rejected	Rejected	Enriched
O75146	Huntingtin-interacting protein 1-related protein [OS=Homo sapiens]	1.1839	1.25547	0.0417838	0.0835676	0.208919	Rejected	Rejected	Enriched
P49368-1	T-complex protein 1 subunit gamma [OS=Homo sapiens]	1.836	2.1808	0.0418378	0.0836757	0.209189	Rejected	Rejected	Enriched
O14776-1	Transcription elongation regulator 1 [OS=Homo sapiens]	1.39851	1.57083	0.0418919	0.0837838	0.209459	Rejected	Rejected	Enriched
A8MWX3	Putative WAS protein family homolog 4 [OS=Homo sapiens]	1.13264	1.18282	0.0419459	0.0838919	0.20973	Rejected	Rejected	Enriched
Q16181	Septin-7 [OS=Homo sapiens]	14.0559	16.4568	0.042	0.084	0.21	Rejected	Rejected	Enriched
Q96A33-1	Coiled-coil domain-containing protein 47 [OS=Homo sapiens]	1.15203	1.21153	0.0420541	0.0841081	0.21027	Rejected	Rejected	Enriched
P51571	translocon-associated protein subunit delta [OS=Homo sapiens]	1.7137	1.82516	0.0421081	0.0842162	0.210541	Rejected	Rejected	Enriched
P17844	probable ATP-dependent RNA helicase DDX5 [OS=Homo sapiens]	3.23432	3.86525	0.0421622	0.0843243	0.210811	Rejected	Rejected	Enriched
O00170	AH receptor-interacting protein [OS=Homo sapiens]	1.12875	1.17909	0.0422162	0.0844324	0.211081	Rejected	Rejected	Enriched
O60264	SWI/SNF-related matrix-associated actin-dependent regulator of chromatin subfamily A member 5 [OS=Homo sapiens]	1.29799	1.38737	0.0422703	0.0845405	0.211351	Rejected	Rejected	Enriched
Q08945	FACT complex subunit SSRP1 [OS=Homo sapiens]	2.12691	2.53347	0.0423243	0.0846486	0.211622	Rejected	Rejected	Enriched
P60981-1	Destrin [OS=Homo sapiens]	2.21161	2.77569	0.0423784	0.0847568	0.211892	Rejected	Rejected	Enriched
Q96JM3	Chromosome alignment-maintaining phosphoprotein 1 [OS=Homo sapiens]	1.6453	1.9054	0.0424324	0.0848649	0.212162	Rejected	Rejected	Enriched
P68402-1	platelet-activating factor acetylhydrolase IB subunit beta [OS=Homo sapiens]	1.14675	1.21142	0.0424865	0.084973	0.212432	Rejected	Rejected	Enriched
Q13501-1	sequestosome-1 [OS=Homo sapiens]	1.15871	1.22329	0.0425405	0.0850811	0.212703	Rejected	Rejected	Enriched
O15042	U2 snRNP-associated SURP motif-containing protein [OS=Homo sapiens]	1.20661	1.29158	0.0425946	0.0851892	0.212973	Rejected	Rejected	Enriched
P49005	DNA polymerase delta subunit 2 [OS=Homo sapiens]	1.13527	1.20399	0.0426486	0.0852973	0.213243	Rejected	Rejected	Enriched
P29323	Ephrin type-B receptor 2 [OS=Homo sapiens]	1.8736	2.25873	0.0427027	0.0854054	0.213514	Rejected	Rejected	Enriched
O95433	activator of 90 kDa heat shock protein ATPase homolog 1 [OS=Homo sapiens]	1.29348	1.47205	0.0427568	0.0855135	0.213784	Rejected	Rejected	Enriched
O00764-1	Pyridoxal kinase [OS=Homo sapiens]	5.40654	5.69577	0.0428108	0.0856216	0.214054	Rejected	Rejected	Enriched
P26583	High mobility group protein B2 [OS=Homo sapiens]	2.24461	2.64037	0.0428649	0.0857297	0.214324	Rejected	Rejected	Enriched
Q8TAT6-2	Isoform 2 of Nuclear protein localization protein 4 homolog [OS=Homo sapiens]	10.804	11.3435	0.0429189	0.0858378	0.214595	Rejected	Rejected	Enriched
P55795	heterogeneous nuclear ribonucleoprotein H2 [OS=Homo sapiens]	2.69712	2.86938	0.042973	0.0859459	0.214865	Rejected	Rejected	Enriched
Q01658	Protein Dr1 [OS=Homo sapiens]	1.15236	1.21865	0.043027	0.0860541	0.215135	Rejected	Rejected	Enriched
Q9Y679-1	Ancient ubiquitous protein 1 [OS=Homo sapiens]	1.13861	1.22698	0.0430811	0.0861622	0.215405	Rejected	Rejected	Enriched
P31350-2	Isoform 2 of Ribonucleoside-diphosphate reductase subunit M2 [OS=Homo sapiens]	1.36884	1.49685	0.0431351	0.0862703	0.215676	Rejected	Rejected	Enriched
P56537-1	eukaryotic translation initiation factor 6 [OS=Homo sapiens]	1.80838	2.08064	0.0431892	0.0863784	0.215946	Rejected	Rejected	Enriched
Q99653	Calcineurin B homologous protein 1 [OS=Homo sapiens]	1.28445	1.39416	0.0432432	0.0864865	0.216216	Rejected	Rejected	Enriched
P51153	Ras-related protein Rab-13 [OS=Homo sapiens]	1.14871	1.23252	0.0432973	0.0865946	0.216486	Rejected	Rejected	Enriched
Q9UEE9-1	Craniofacial development protein 1 [OS=Homo sapiens]	1.32281	1.47105	0.0433514	0.0867027	0.216757	Rejected	Rejected	Enriched
P18031	Tyrosine-protein phosphatase non-receptor type 1 [OS=Homo sapiens]	1.32307	1.45353	0.0434054	0.0868108	0.217027	Rejected	Rejected	Enriched
O75475-1	PC4 and SFRS1-interacting protein [OS=Homo sapiens]	1.44434	1.61597	0.0434595	0.0869189	0.217297	Rejected	Rejected	Enriched
P36543	V-type proton ATPase subunit E 1 [OS=Homo sapiens]	1.28979	1.40877	0.0435135	0.087027	0.217568	Rejected	Rejected	Enriched
Q9Y613	FH1/FH2 domain-containing protein 1 [OS=Homo sapiens]	12.4039	13.769	0.0435676	0.0871351	0.217838	Rejected	Rejected	Enriched
Q9BUF5	Tubulin beta-6 chain [OS=Homo sapiens]	1.61439	2.01052	0.0436216	0.0872432	0.218108	Rejected	Rejected	Enriched
P14618	Pyruvate kinase PKM [OS=Homo sapiens]	2.18722	2.32081	0.0436757	0.0873514	0.218378	Rejected	Rejected	Enriched
Q14980-1	nuclear mitotic apparatus protein 1 [OS=Homo sapiens]	1.67241	1.9969	0.0437297	0.0874595	0.218649	Rejected	Rejected	Enriched
P63010-2	Isoform 2 of AP-2 complex subunit beta [OS=Homo sapiens]	1.45	1.5624	0.0437838	0.0875676	0.218919	Rejected	Rejected	Enriched
O43252	bifunctional 3'-phosphoadenosine 5'-phosphosulfate synthase 1 [OS=Homo sapiens]	1.1922	1.28569	0.0438378	0.0876757	0.219189	Rejected	Rejected	Enriched
P28838	cytosol aminopeptidase [OS=Homo sapiens]	2.29904	2.6776	0.0438919	0.0877838	0.219459	Rejected	Rejected	Enriched
P43304	Glycerol-3-phosphate dehydrogenase, mitochondrial [OS=Homo sapiens]	1.1588	1.23797	0.0439459	0.0878919	0.21973	Rejected	Rejected	Enriched
P62873	Guanine nucleotide-binding protein G(I)/G(S)/G(T) subunit beta-1 [OS=Homo sapiens]	1.20938	1.31489	0.044	0.088	0.22	Rejected	Rejected	Enriched
Q99598	Translin-associated protein X [OS=Homo sapiens]	1.12061	1.18422	0.0440541	0.0881081	0.22027	Rejected	Rejected	Enriched
Q9H0U4	ras-related protein Rab-1B [OS=Homo sapiens]	2.47781	3.2024	0.0441081	0.0882162	0.220541	Rejected	Rejected	Enriched
Q8NCG7	Sn1-specific diacylglycerol lipase beta [OS=Homo sapiens]	1.16087	1.28097	0.0441622	0.0883243	0.220811	Rejected	Rejected	Enriched
P50454	Serpin H1 [OS=Homo sapiens]	1.56876	1.70952	0.0442162	0.0884324	0.221081	Rejected	Rejected	Enriched
P18621-3	Isoform 3 of 60S ribosomal protein L17 [OS=Homo sapiens]	1.51299	1.74431	0.0442703	0.0885405	0.221351	Rejected	Rejected	Enriched
Q03252	Lamin-B2 [OS=Homo sapiens]	3.41837	4.4205	0.0443243	0.0886486	0.221622	Rejected	Rejected	Enriched
P62879	Guanine nucleotide-binding protein G(I)/G(S)/G(T) subunit beta-2 [OS=Homo sapiens]	1.17817	1.2806	0.0443784	0.0887568	0.221892	Rejected	Rejected	Enriched
Q96CB8	integrator complex subunit 12 [OS=Homo sapiens]	1.35709	1.60578	0.0444324	0.0888649	0.222162	Rejected	Rejected	Enriched
P26038	Moesin [OS=Homo sapiens]	1.58329	1.98929	0.0444865	0.088973	0.222432	Rejected	Rejected	Enriched
P49721	proteasome subunit beta type-2 [OS=Homo sapiens]	1.56552	1.94169	0.0445405	0.0890811	0.222703	Rejected	Rejected	Enriched
Q9Y3T9	Nucleolar complex protein 2 homolog [OS=Homo sapiens]	1.16988	1.28332	0.0445946	0.0891892	0.222973	Rejected	Rejected	Enriched
P38117-2	Isoform 2 of Electron transfer flavoprotein subunit beta [OS=Homo sapiens]	2.14159	2.46644	0.0446486	0.0892973	0.223243	Rejected	Rejected	Enriched
P30876	DNA-directed RNA polymerase II subunit RPB2 [OS=Homo sapiens]	1.76482	2.22245	0.0447027	0.0894054	0.223514	Rejected	Rejected	Enriched
Q92973-1	transportin-1 [OS=Homo sapiens]	2.20635	2.53578	0.0447568	0.0895135	0.223784	Rejected	Rejected	Enriched
O15498	Synaptobrevin homolog YKT6 [OS=Homo sapiens]	1.17023	1.26834	0.0448108	0.0896216	0.224054	Rejected	Rejected	Enriched
P11586	C-1-tetrahydrofolate synthase, cytoplasmic [OS=Homo sapiens]	1.65556	2.19121	0.0448649	0.0897297	0.224324	Rejected	Rejected	Enriched
P39023	60S ribosomal protein L3 [OS=Homo sapiens]	1.44056	1.62611	0.0449189	0.0898378	0.224595	Rejected	Rejected	Enriched
Q93009	Ubiquitin carboxyl-terminal hydrolase 7 [OS=Homo sapiens]	1.49738	1.81395	0.044973	0.0899459	0.224865	Rejected	Rejected	Enriched
P24752	Acetyl-CoA acetyltransferase, mitochondrial [OS=Homo sapiens]	1.64708	1.76108	0.045027	0.0900541	0.225135	Rejected	Rejected	Enriched
Q96C57	Uncharacterized protein C12orf43 [OS=Homo sapiens]	1.17616	1.263	0.0450811	0.0901622	0.225405	Rejected	Rejected	Enriched
P27348	14-3-3 protein theta [OS=Homo sapiens]	1.96293	2.56934	0.0451351	0.0902703	0.225676	Rejected	Rejected	Enriched
Q9UI12-1	V-type proton ATPase subunit H [OS=Homo sapiens]	1.75	1.93263	0.0451892	0.0903784	0.225946	Rejected	Rejected	Enriched
Q9NZZ3	Charged multivesicular body protein 5 [OS=Homo sapiens]	1.73026	2.4116	0.0452432	0.0904865	0.226216	Rejected	Rejected	Enriched
Q9Y5A9-1	YTH domain-containing family protein 2 [OS=Homo sapiens]	1.28934	1.41944	0.0452973	0.0905946	0.226486	Rejected	Rejected	Enriched
P32322-3	Isoform 3 of Pyrroline-5-carboxylate reductase 1, mitochondrial [OS=Homo sapiens]	1.77824	2.25741	0.0453514	0.0907027	0.226757	Rejected	Rejected	Enriched
Q8IWE2	Protein Noxp20 [OS=Homo sapiens]	1.29134	1.44941	0.0454054	0.0908108	0.227027	Rejected	Rejected	Enriched
P81605-2	Isoform 2 of Dermcidin [OS=Homo sapiens]	1.46474	1.78807	0.0454595	0.0909189	0.227297	Rejected	Rejected	Enriched
Q92879-4	Isoform 4 of CUGBP Elav-like family member 1 [OS=Homo sapiens]	2.25866	2.77594	0.0455135	0.091027	0.227568	Rejected	Rejected	Enriched
A6NDG6	glycerol-3-phosphate phosphatase [OS=Homo sapiens]	1.14065	1.23236	0.0455676	0.0911351	0.227838	Rejected	Rejected	Enriched
Q13405	39S ribosomal protein L49, mitochondrial [OS=Homo sapiens]	1.3052	1.40888	0.0456216	0.0912432	0.228108	Rejected	Rejected	Enriched
Q96KP4	cytosolic non-specific dipeptidase [OS=Homo sapiens]	1.57441	1.80308	0.0456757	0.0913514	0.228378	Rejected	Rejected	Enriched
P33240	cleavage stimulation factor subunit 2 [OS=Homo sapiens]	1.42458	1.70093	0.0457297	0.0914595	0.228649	Rejected	Rejected	Enriched
Q9BRX5	DNA replication complex GINS protein PSF3 [OS=Homo sapiens]	1.12753	1.21824	0.0457838	0.0915676	0.228919	Rejected	Rejected	Enriched
Q5T9A4	ATPase family AAA domain-containing protein 3B [OS=Homo sapiens]	1.31352	1.51065	0.0458378	0.0916757	0.229189	Rejected	Rejected	Enriched
P29218-3	Isoform 3 of Inositol monophosphatase 1 [OS=Homo sapiens]	2.72531	4.01645	0.0458919	0.0917838	0.229459	Rejected	Rejected	Enriched
Q13617-2	Isoform 2 of Cullin-2 [OS=Homo sapiens]	1.15754	1.28786	0.0459459	0.0918919	0.22973	Rejected	Rejected	Enriched
P24534	Elongation factor 1-beta [OS=Homo sapiens]	1.44986	1.8226	0.046	0.092	0.23	Rejected	Rejected	Enriched
Q15717-2	Isoform 2 of ELAV-like protein 1 [OS=Homo sapiens]	1.54829	2.12991	0.0460541	0.0921081	0.23027	Rejected	Rejected	Enriched
O00422	Histone deacetylase complex subunit SAP18 [OS=Homo sapiens]	1.46135	1.65789	0.0461081	0.0922162	0.230541	Rejected	Rejected	Enriched
P54920	alpha-soluble nsf attachment protein [OS=Homo sapiens]	1.10282	1.15083	0.0461622	0.0923243	0.230811	Rejected	Rejected	Enriched
Q16891	MICOS complex subunit Mic60 [OS=Homo sapiens]	1.88259	2.24697	0.0462162	0.0924324	0.231081	Rejected	Rejected	Enriched
O75717	WD repeat and HMG-box DNA-binding protein 1 [OS=Homo sapiens]	1.17803	1.28752	0.0462703	0.0925405	0.231351	Rejected	Rejected	Enriched
Q09666-1	Neuroblast differentiation-associated protein AHNAK [OS=Homo sapiens]	1.2434	1.40426	0.0463243	0.0926486	0.231622	Rejected	Rejected	Enriched
P26006-1	Isoform 2 of Integrin alpha-3 [OS=Homo sapiens]	2.28229	3.12342	0.0463784	0.0927568	0.231892	Rejected	Rejected	Enriched
P36405	ADP-ribosylation factor-like protein 3 [OS=Homo sapiens]	1.39834	1.53278	0.0464324	0.0928649	0.232162	Rejected	Rejected	Enriched
P36776	Lon protease homolog, mitochondrial [OS=Homo sapiens]	2.15941	2.40303	0.0464865	0.092973	0.232432	Rejected	Rejected	Enriched
P06730-2	Isoform 2 of Eukaryotic translation initiation factor 4E [OS=Homo sapiens]	1.79211	2.12889	0.0465405	0.0930811	0.232703	Rejected	Rejected	Enriched
Q99471-1	prefoldin subunit 5 [OS=Homo sapiens]	1.49994	1.65251	0.0465946	0.0931892	0.232973	Rejected	Rejected	Enriched
P61088	ubiquitin-conjugating enzyme E2 N [OS=Homo sapiens]	1.31273	1.40403	0.0466486	0.0932973	0.233243	Rejected	Rejected	Enriched
P30419	glycylpeptide N-tetradecanoyltransferase 1 [OS=Homo sapiens]	2.09278	2.32771	0.0467027	0.0934054	0.233514	Rejected	Rejected	Enriched
O43169	Cytochrome b5 type B [OS=Homo sapiens]	1.99524	2.15261	0.0467568	0.0935135	0.233784	Rejected	Rejected	Enriched
P04843	Dolichyl-diphosphooligosaccharide--protein glycosyltransferase subunit 1 [OS=Homo sapiens]	1.82735	2.36959	0.0468108	0.0936216	0.234054	Rejected	Rejected	Enriched
P62258-1	14-3-3 protein epsilon [OS=Homo sapiens]	1.46774	1.88686	0.0468649	0.0937297	0.234324	Rejected	Rejected	Enriched
P49736	DNA replication licensing factor mcm2 [OS=Homo sapiens]	2.97167	3.88212	0.0469189	0.0938378	0.234595	Rejected	Rejected	Enriched
Q8WUM0	Nuclear pore complex protein Nup133 [OS=Homo sapiens]	1.64454	1.84477	0.046973	0.0939459	0.234865	Rejected	Rejected	Enriched
P31946	14-3-3 protein beta/alpha [OS=Homo sapiens]	1.80483	2.66756	0.047027	0.0940541	0.235135	Rejected	Rejected	Enriched
Q6ZUT6-1	Uncharacterized protein C15orf52 [OS=Homo sapiens]	1.65166	1.91941	0.0470811	0.0941622	0.235405	Rejected	Rejected	Enriched
Q13177	Serine/threonine-protein kinase PAK 2 [OS=Homo sapiens]	1.22417	1.36908	0.0471351	0.0942703	0.235676	Rejected	Rejected	Enriched
Q9HCE1	Putative helicase MOV-10 [OS=Homo sapiens]	12.6806	15.4582	0.0471892	0.0943784	0.235946	Rejected	Rejected	Enriched
P48681	Nestin [OS=Homo sapiens]	1.32701	1.59332	0.0472432	0.0944865	0.236216	Rejected	Rejected	Enriched
Q9NP81-1	Serine--tRNA ligase, mitochondrial [OS=Homo sapiens]	1.14461	1.25916	0.0472973	0.0945946	0.236486	Rejected	Rejected	Enriched
P53999	Activated RNA polymerase II transcriptional coactivator p15 [OS=Homo sapiens]	1.45658	1.81393	0.0473514	0.0947027	0.236757	Rejected	Rejected	Enriched
O14744	Protein arginine N-methyltransferase 5 [OS=Homo sapiens]	1.11647	1.19305	0.0474054	0.0948108	0.237027	Rejected	Rejected	Enriched
Q9Y262	eukaryotic translation initiation factor 3 subunit L [OS=Homo sapiens]	1.79065	2.24796	0.0474595	0.0949189	0.237297	Rejected	Rejected	Enriched
O75534-4	Isoform 4 of Cold shock domain-containing protein E1 [OS=Homo sapiens]	1.49191	2.01086	0.0475135	0.095027	0.237568	Rejected	Rejected	Enriched
Q9BX40	protein LSM14 homolog B [OS=Homo sapiens]	1.15956	1.24639	0.0475676	0.0951351	0.237838	Rejected	Rejected	Enriched
O43615	Mitochondrial import inner membrane translocase subunit TIM44 [OS=Homo sapiens]	8.85595	11.3523	0.0476216	0.0952432	0.238108	Rejected	Rejected	Enriched
P36578	60S ribosomal protein L4 [OS=Homo sapiens]	1.52604	1.92205	0.0476757	0.0953514	0.238378	Rejected	Rejected	Enriched
P14314	Glucosidase 2 subunit beta [OS=Homo sapiens]	7.05809	11.5804	0.0477297	0.0954595	0.238649	Rejected	Rejected	Enriched
P15586	N-acetylglucosamine-6-sulfatase [OS=Homo sapiens]	1.15539	1.2733	0.0477838	0.0955676	0.238919	Rejected	Rejected	Enriched
P47897	glutamine--tRNA ligase [OS=Homo sapiens]	2.14788	2.66851	0.0478378	0.0956757	0.239189	Rejected	Rejected	Enriched
Q9Y4L1	Hypoxia up-regulated protein 1 [OS=Homo sapiens]	2.12964	2.4495	0.0478919	0.0957838	0.239459	Rejected	Rejected	Enriched
Q7KZ85	transcription elongation factor spt6 [OS=Homo sapiens]	1.15008	1.27557	0.0479459	0.0958919	0.23973	Rejected	Rejected	Enriched
P62910	60S ribosomal protein L32 [OS=Homo sapiens]	1.26144	1.47553	0.048	0.096	0.24	Rejected	Rejected	Enriched
Q7L2E3-2	Isoform 2 of Putative ATP-dependent RNA helicase DHX30 [OS=Homo sapiens]	1.74098	1.92617	0.0480541	0.0961081	0.24027	Rejected	Rejected	Enriched
P30101	Protein disulfide-isomerase A3 [OS=Homo sapiens]	1.53286	2.02359	0.0481081	0.0962162	0.240541	Rejected	Rejected	Enriched
Q7L9L4-2	Isoform 2 of MOB kinase activator 1B [OS=Homo sapiens]	1.2528	1.38159	0.0481622	0.0963243	0.240811	Rejected	Rejected	Enriched
P31930	Cytochrome b-c1 complex subunit 1, mitochondrial [OS=Homo sapiens]	1.50637	1.89905	0.0482162	0.0964324	0.241081	Rejected	Rejected	Enriched
P22676	Calretinin [OS=Homo sapiens]	1.7771	1.95907	0.0482703	0.0965405	0.241351	Rejected	Rejected	Enriched
Q12849	G-rich sequence factor 1 [OS=Homo sapiens]	1.34477	1.72625	0.0483243	0.0966486	0.241622	Rejected	Rejected	Enriched
Q01650	large neutral amino acids transporter small subunit 1 [OS=Homo sapiens]	1.1472	1.25538	0.0483784	0.0967568	0.241892	Rejected	Rejected	Enriched
P24928	DNA-directed RNA polymerase II subunit RPB1 [OS=Homo sapiens]	1.20059	1.33723	0.0484324	0.0968649	0.242162	Rejected	Rejected	Enriched
Q9UNM6	26S proteasome non-ATPase regulatory subunit 13 [OS=Homo sapiens]	1.51743	1.83583	0.0484865	0.096973	0.242432	Rejected	Rejected	Enriched
Q969T9	WW domain-binding protein 2 [OS=Homo sapiens]	1.11851	1.21911	0.0485405	0.0970811	0.242703	Rejected	Rejected	Enriched
Q9Y371-2	Isoform 2 of Endophilin-B1 [OS=Homo sapiens]	1.13838	1.24177	0.0485946	0.0971892	0.242973	Rejected	Rejected	Enriched
Q15008-4	Isoform 4 of 26S proteasome non-ATPase regulatory subunit 6 [OS=Homo sapiens]	1.12426	1.21794	0.0486486	0.0972973	0.243243	Rejected	Rejected	Enriched
P25786-2	Isoform Long of Proteasome subunit alpha type-1 [OS=Homo sapiens]	1.33762	1.63476	0.0487027	0.0974054	0.243514	Rejected	Rejected	Enriched
P33991	DNA replication licensing factor MCM4 [OS=Homo sapiens]	5.4067	7.15187	0.0487568	0.0975135	0.243784	Rejected	Rejected	Enriched
Q9NTZ6	RNA-binding protein 12 [OS=Homo sapiens]	2.37371	2.72091	0.0488108	0.0976216	0.244054	Rejected	Rejected	Enriched
P52306-5	Isoform 5 of Rap1 GTPase-GDP dissociation stimulator 1 [OS=Homo sapiens]	1.34479	1.75903	0.0488649	0.0977297	0.244324	Rejected	Rejected	Enriched
P57764	Gasdermin-D [OS=Homo sapiens]	1.99253	2.36117	0.0489189	0.0978378	0.244595	Rejected	Rejected	Enriched
O00505	Importin subunit alpha-4 [OS=Homo sapiens]	1.30128	1.53675	0.048973	0.0979459	0.244865	Rejected	Rejected	Enriched
P60903	Protein S100-A10 [OS=Homo sapiens]	6.79919	7.68164	0.049027	0.0980541	0.245135	Rejected	Rejected	Enriched
O00154	cytosolic acyl coenzyme A thioester hydrolase [OS=Homo sapiens]	1.1347	1.24159	0.0490811	0.0981622	0.245405	Rejected	Rejected	Enriched
Q9UHX1-2	Isoform 2 of Poly(U)-binding-splicing factor PUF60 [OS=Homo sapiens]	1.53447	2.19484	0.0491351	0.0982703	0.245676	Rejected	Rejected	Enriched
P06756	Integrin alpha-V [OS=Homo sapiens]	1.11818	1.22332	0.0491892	0.0983784	0.245946	Rejected	Rejected	Enriched
O75165	DnaJ homolog subfamily C member 13 [OS=Homo sapiens]	1.12823	1.23693	0.0492432	0.0984865	0.246216	Rejected	Rejected	Enriched
Q15370-2	Isoform 2 of Transcription elongation factor B polypeptide 2 [OS=Homo sapiens]	1.72649	1.86782	0.0492973	0.0985946	0.246486	Rejected	Rejected	Enriched
P60983	glia maturation factor beta [OS=Homo sapiens]	1.25849	1.48037	0.0493514	0.0987027	0.246757	Rejected	Rejected	Enriched
Q9NR45	sialic acid synthase [OS=Homo sapiens]	1.15657	1.29974	0.0494054	0.0988108	0.247027	Rejected	Rejected	Enriched
Q6P5R6	60S ribosomal protein L22-like 1 [OS=Homo sapiens]	1.16328	1.32451	0.0494595	0.0989189	0.247297	Rejected	Rejected	Enriched
P49748-3	Isoform 3 of Very long-chain specific acyl-CoA dehydrogenase, mitochondrial [OS=Homo sapiens]	1.14751	1.27471	0.0495135	0.099027	0.247568	Rejected	Rejected	Enriched
Q03135	Caveolin-1 [OS=Homo sapiens]	1.38745	1.59827	0.0495676	0.0991351	0.247838	Rejected	Rejected	Enriched
Q96I99-1	Succinyl-CoA ligase [GDP-forming] subunit beta, mitochondrial [OS=Homo sapiens]	2.31382	3.12585	0.0496216	0.0992432	0.248108	Rejected	Rejected	Enriched
Q04323-2	Isoform 2 of UBX domain-containing protein 1 [OS=Homo sapiens]	1.60121	1.83172	0.0496757	0.0993514	0.248378	Rejected	Rejected	Enriched
Q96CV9-1	Optineurin [OS=Homo sapiens]	1.12338	1.22891	0.0497297	0.0994595	0.248649	Rejected	Rejected	Enriched
P17987	T-complex protein 1 subunit alpha [OS=Homo sapiens]	2.08992	2.72321	0.0497838	0.0995676	0.248919	Rejected	Rejected	Enriched
O75683	Surfeit locus protein 6 [OS=Homo sapiens]	1.12821	1.2664	0.0498378	0.0996757	0.249189	Rejected	Rejected	Enriched
P61221	ATP-binding cassette sub-family E member 1 [OS=Homo sapiens]	1.92369	2.11951	0.0498919	0.0997838	0.249459	Rejected	Rejected	Enriched
Q9UBL3-1	Set1/Ash2 histone methyltransferase complex subunit ASH2 [OS=Homo sapiens]	1.40521	1.57225	0.0499459	0.0998919	0.24973	Rejected	Rejected	Enriched
Q8NF91	Nesprin-1 [OS=Homo sapiens]	4.85201	5.23867	0.05	0.1	0.25	Rejected	Rejected	Enriched
Q9Y224	UPF0568 protein C14orf166 [OS=Homo sapiens]	1.1252	1.2315	0.0500541	0.100108	0.25027	Rejected	Rejected	Enriched
P33992	DNA replication licensing factor mcm5 [OS=Homo sapiens]	1.76215	2.23714	0.0501081	0.100216	0.250541	Rejected	Rejected	Enriched
Q15149-4	Isoform 4 of Plectin [OS=Homo sapiens]	2.40586	2.84446	0.0501622	0.100324	0.250811	Rejected	Rejected	Enriched
Q13557-11	Isoform Delta 11 of Calcium/calmodulin-dependent protein kinase type II subunit delta [OS=Homo sapiens]	1.47602	1.72142	0.0502162	0.100432	0.251081	Rejected	Rejected	Enriched
P54727	UV excision repair protein RAD23 homolog B [OS=Homo sapiens]	1.38285	1.85906	0.0502703	0.100541	0.251351	Rejected	Rejected	Enriched
Q15393-1	Splicing factor 3B subunit 3 [OS=Homo sapiens]	1.60104	1.91945	0.0503243	0.100649	0.251622	Rejected	Rejected	Enriched
P35222	Catenin beta-1 [OS=Homo sapiens]	1.21795	1.36197	0.0503784	0.100757	0.251892	Rejected	Rejected	Enriched
Q16629	serine/arginine-rich splicing factor 7 [OS=Homo sapiens]	1.69097	1.84004	0.0504324	0.100865	0.252162	Rejected	Rejected	Enriched
Q13509	tubulin beta-3 chain [OS=Homo sapiens]	1.10114	1.20405	0.0504865	0.100973	0.252432	Rejected	Rejected	Enriched
P35269	General transcription factor iif subunit 1 [OS=Homo sapiens]	1.12999	1.27178	0.0505405	0.101081	0.252703	Rejected	Rejected	Enriched
Q969V3	Nicalin [OS=Homo sapiens]	1.1832	1.36123	0.0505946	0.101189	0.252973	Rejected	Rejected	Enriched
P55769	NHP2-like protein 1 [OS=Homo sapiens]	2.82007	3.11898	0.0506486	0.101297	0.253243	Rejected	Rejected	Enriched
Q6WKZ4-4	Rab11 family-interacting protein 1 [OS=Homo sapiens]	1.15253	1.27374	0.0507027	0.101405	0.253514	Rejected	Rejected	Enriched
O95197-3	Isoform 3 of Reticulon-3 [OS=Homo sapiens]	1.11387	1.22747	0.0507568	0.101514	0.253784	Rejected	Rejected	Enriched
P12532-2	Isoform 2 of Creatine kinase U-type, mitochondrial [OS=Homo sapiens]	1.17042	1.34695	0.0508108	0.101622	0.254054	Rejected	Rejected	Enriched
Q9BQE3	Tubulin alpha-1C chain [OS=Homo sapiens]	1.40001	1.68318	0.0508649	0.10173	0.254324	Rejected	Rejected	Enriched
O75489	NADH dehydrogenase [ubiquinone] iron-sulfur protein 3, mitochondrial [OS=Homo sapiens]	1.26815	1.60742	0.0509189	0.101838	0.254595	Rejected	Rejected	Enriched
Q16718	NADH dehydrogenase [ubiquinone] 1 alpha subcomplex subunit 5 [OS=Homo sapiens]	1.95617	2.45306	0.050973	0.101946	0.254865	Rejected	Rejected	Enriched
O75367-1	Core histone macro-H2A.1 [OS=Homo sapiens]	3.29254	6.2099	0.051027	0.102054	0.255135	Rejected	Rejected	Enriched
Q969H8	Myeloid-derived growth factor [OS=Homo sapiens]	1.17006	1.3312	0.0510811	0.102162	0.255405	Rejected	Rejected	Enriched
Q00577	Transcriptional activator protein Pur-alpha [OS=Homo sapiens]	1.11593	1.24611	0.0511351	0.10227	0.255676	Rejected	Rejected	Enriched
Q13268	dehydrogenase/reductase SDR family member 2, mitochondrial [OS=Homo sapiens]	2.07791	2.31328	0.0511892	0.102378	0.255946	Rejected	Rejected	Enriched
P62753	40S RIBOSOMAL PROTEIN S6 [OS=Homo sapiens]	1.16172	1.31019	0.0512432	0.102486	0.256216	Rejected	Rejected	Enriched
Q16851	UTP--glucose-1-phosphate uridylyltransferase [OS=Homo sapiens]	1.33931	1.67309	0.0512973	0.102595	0.256486	Rejected	Rejected	Enriched
P62070-4	Isoform 4 of Ras-related protein R-Ras2 [OS=Homo sapiens]	1.14012	1.25078	0.0513514	0.102703	0.256757	Rejected	Rejected	Enriched
O60506	Heterogeneous nuclear ribonucleoprotein Q [OS=Homo sapiens]	1.60142	2.02369	0.0514054	0.102811	0.257027	Rejected	Rejected	Enriched
Q99848	Probable rRNA-processing protein EBP2 [OS=Homo sapiens]	1.11385	1.2477	0.0514595	0.102919	0.257297	Rejected	Rejected	Enriched
Q9Y2Z4	Tyrosine--tRNA ligase, mitochondrial [OS=Homo sapiens]	1.08013	1.15736	0.0515135	0.103027	0.257568	Rejected	Rejected	Enriched
P49643-1	DNA primase large subunit [OS=Homo sapiens]	1.10775	1.24204	0.0515676	0.103135	0.257838	Rejected	Rejected	Enriched
O76094	Signal recognition particle subunit SRP72 [OS=Homo sapiens]	2.16323	2.60204	0.0516216	0.103243	0.258108	Rejected	Rejected	Enriched
P09493-5	Isoform 5 of Tropomyosin alpha-1 chain [OS=Homo sapiens]	1.42162	1.85033	0.0516757	0.103351	0.258378	Rejected	Rejected	Enriched
Q9BY44-1	Eukaryotic translation initiation factor 2A [OS=Homo sapiens]	1.79619	2.51032	0.0517297	0.103459	0.258649	Rejected	Rejected	Enriched
O14737	Programmed cell death protein 5 [OS=Homo sapiens]	1.56076	2.65171	0.0517838	0.103568	0.258919	Rejected	Rejected	Enriched
P67775	Serine/threonine-protein phosphatase 2A catalytic subunit alpha isoform [OS=Homo sapiens]	2.12676	2.95291	0.0518378	0.103676	0.259189	Rejected	Rejected	Enriched
P48739-3	Isoform 3 of Phosphatidylinositol transfer protein beta isoform [OS=Homo sapiens]	2.2711	4.43346	0.0518919	0.103784	0.259459	Rejected	Rejected	Enriched
Q99543-1	dnaJ homolog subfamily C member 2 [OS=Homo sapiens]	1.13818	1.29262	0.0519459	0.103892	0.25973	Rejected	Rejected	Enriched
P42285	Superkiller viralicidic activity 2-like 2 [OS=Homo sapiens]	1.83972	2.04567	0.052	0.104	0.26	Rejected	Rejected	Enriched
P16152	Carbonyl reductase [NADPH] 1 [OS=Homo sapiens]	1.75213	3.23503	0.0520541	0.104108	0.26027	Rejected	Rejected	Enriched
P42696	RNA-binding protein 34 [OS=Homo sapiens]	1.38815	1.84353	0.0521081	0.104216	0.260541	Rejected	Rejected	Enriched
O14974	Protein phosphatase 1 regulatory subunit 12A [OS=Homo sapiens]	2.23909	2.84899	0.0521622	0.104324	0.260811	Rejected	Rejected	Enriched
Q9UJS0-2	Isoform 2 of Calcium-binding mitochondrial carrier protein Aralar2 [OS=Homo sapiens]	1.45718	1.65657	0.0522162	0.104432	0.261081	Rejected	Rejected	Enriched
P13995	Bifunctional methylenetetrahydrofolate dehydrogenase/cyclohydrolase, mitochondrial [OS=Homo sapiens]	1.60672	1.94051	0.0522703	0.104541	0.261351	Rejected	Rejected	Enriched
Q9NVD7	alpha-parvin [OS=Homo sapiens]	9.57752	10.597	0.0523243	0.104649	0.261622	Rejected	Rejected	Enriched
Q96DI7-2	Isoform 2 of U5 small nuclear ribonucleoprotein 40 kDa protein [OS=Homo sapiens]	1.10314	1.23763	0.0523784	0.104757	0.261892	Rejected	Rejected	Enriched
A0AVT1-1	Ubiquitin-like modifier-activating enzyme 6 [OS=Homo sapiens]	3.62058	5.87335	0.0524324	0.104865	0.262162	Rejected	Rejected	Enriched
Q99832	T-complex protein 1 subunit eta [OS=Homo sapiens]	2.33087	3.52056	0.0524865	0.104973	0.262432	Rejected	Rejected	Enriched
Q9UNS2	COP9 signalosome complex subunit 3 [OS=Homo sapiens]	1.32335	1.84691	0.0525405	0.105081	0.262703	Rejected	Rejected	Enriched
Q9H4M9	EH domain-containing protein 1 [OS=Homo sapiens]	2.18663	3.52446	0.0525946	0.105189	0.262973	Rejected	Rejected	Enriched
O75368	SH3 domain-binding glutamic acid-rich-like protein [OS=Homo sapiens]	1.25458	1.49642	0.0526486	0.105297	0.263243	Rejected	Rejected	Enriched
Q9BRJ6	Uncharacterized protein C7orf50 [OS=Homo sapiens]	6.77947	7.54089	0.0527027	0.105405	0.263514	Rejected	Rejected	Enriched
Q9UNF0	Protein kinase C and casein kinase substrate in neurons protein 2 [OS=Homo sapiens]	1.96096	2.80717	0.0527568	0.105514	0.263784	Rejected	Rejected	Enriched
Q9HAV4	exportin-5 [OS=Homo sapiens]	1.11156	1.27718	0.0528108	0.105622	0.264054	Rejected	Rejected	Enriched
Q9H9P8-1	L-2-hydroxyglutarate dehydrogenase, mitochondrial [OS=Homo sapiens]	1.13347	1.28327	0.0528649	0.10573	0.264324	Rejected	Rejected	Enriched
P21291	Cysteine and glycine-rich protein 1 [OS=Homo sapiens]	1.14174	1.31575	0.0529189	0.105838	0.264595	Rejected	Rejected	Enriched
O95232-1	Luc7-like protein 3 [OS=Homo sapiens]	2.61419	3.60738	0.052973	0.105946	0.264865	Rejected	Rejected	Enriched
Q02952-1	A-kinase anchor protein 12 [OS=Homo sapiens]	1.13541	1.26416	0.053027	0.106054	0.265135	Rejected	Rejected	Enriched
P30085-1	UMP-CMP kinase [OS=Homo sapiens]	3.37753	4.07092	0.0530811	0.106162	0.265405	Rejected	Rejected	Enriched
Q15293	Reticulocalbin-1 [OS=Homo sapiens]	1.80868	3.62012	0.0531351	0.10627	0.265676	Rejected	Rejected	Enriched
P53582	Methionine aminopeptidase 1 [OS=Homo sapiens]	5.9954	15.7203	0.0531892	0.106378	0.265946	Rejected	Rejected	Enriched
Q9BQG0-2	Isoform 2 of Myb-binding protein 1A [OS=Homo sapiens]	1.13857	1.30645	0.0532432	0.106486	0.266216	Rejected	Rejected	Enriched
P21281	V-type proton ATPase subunit B, brain isoform [OS=Homo sapiens]	1.89099	2.2809	0.0532973	0.106595	0.266486	Rejected	Rejected	Enriched
P13010	X-ray repair cross-complementing protein 5 [OS=Homo sapiens]	2.06964	4.52143	0.0533514	0.106703	0.266757	Rejected	Rejected	Enriched
Q9BW27	nuclear pore complex protein Nup85 [OS=Homo sapiens]	1.1129	1.24958	0.0534054	0.106811	0.267027	Rejected	Rejected	Enriched
Q07955-1	Serine/arginine-rich splicing factor 1 [OS=Homo sapiens]	1.23685	1.59067	0.0534595	0.106919	0.267297	Rejected	Rejected	Enriched
Q9UL46	proteasome activator complex subunit 2 [OS=Homo sapiens]	1.35158	1.80669	0.0535135	0.107027	0.267568	Rejected	Rejected	Enriched
Q01082-1	Spectrin beta chain, non-erythrocytic 1 [OS=Homo sapiens]	1.33733	1.75265	0.0535676	0.107135	0.267838	Rejected	Rejected	Enriched
Q01844-5	Isoform 5 of RNA-binding protein EWS [OS=Homo sapiens]	1.10602	1.21349	0.0536216	0.107243	0.268108	Rejected	Rejected	Enriched
P49915	GMP synthase [glutamine-hydrolyzing] [OS=Homo sapiens]	1.47945	2.22231	0.0536757	0.107351	0.268378	Rejected	Rejected	Enriched
Q9H3Q1	Cdc42 effector protein 4 [OS=Homo sapiens]	1.36774	1.9921	0.0537297	0.107459	0.268649	Rejected	Rejected	Enriched
Q5T6V5	UPF0553 protein C9orf64 [OS=Homo sapiens]	1.8697	4.00819	0.0537838	0.107568	0.268919	Rejected	Rejected	Enriched
P98179	RNA-binding protein 3 [OS=Homo sapiens]	6.46061	8.35713	0.0538378	0.107676	0.269189	Rejected	Rejected	Enriched
P06493	Cyclin-dependent kinase 1 [OS=Homo sapiens]	2.90734	4.37264	0.0538919	0.107784	0.269459	Rejected	Rejected	Enriched
Q16630-2	Isoform 2 of Cleavage and polyadenylation specificity factor subunit 6 [OS=Homo sapiens]	2.2755	2.54782	0.0539459	0.107892	0.26973	Rejected	Rejected	Enriched
Q14160-3	Isoform 3 of Protein scribble homolog [OS=Homo sapiens]	1.10698	1.23789	0.054	0.108	0.27	Rejected	Rejected	Enriched
P28070	Proteasome subunit beta type-4 [OS=Homo sapiens]	2.05493	2.62718	0.0540541	0.108108	0.27027	Rejected	Rejected	Enriched
P30626-1	Sorcin [OS=Homo sapiens]	1.31347	1.81203	0.0541081	0.108216	0.270541	Rejected	Rejected	Enriched
Q9NVS9	Pyridoxine-5'-phosphate oxidase [OS=Homo sapiens]	2.21262	2.73239	0.0541622	0.108324	0.270811	Rejected	Rejected	Enriched
Q14019	coactosin-like protein [OS=Homo sapiens]	1.14714	1.33592	0.0542162	0.108432	0.271081	Rejected	Rejected	Enriched
P23193	Transcription elongation factor A protein 1 [OS=Homo sapiens]	1.60712	2.38158	0.0542703	0.108541	0.271351	Rejected	Rejected	Enriched
O43684	Mitotic checkpoint protein BUB3 [OS=Homo sapiens]	1.66257	1.91818	0.0543243	0.108649	0.271622	Rejected	Rejected	Enriched
P49755	Transmembrane emp24 domain-containing protein 10 [OS=Homo sapiens]	1.1756	1.38459	0.0543784	0.108757	0.271892	Rejected	Rejected	Enriched
P08134	Rho-related GTP-binding protein RhoC [OS=Homo sapiens]	1.11712	1.29588	0.0544324	0.108865	0.272162	Rejected	Rejected	Enriched
Q01780	exosome component 10 [OS=Homo sapiens]	1.08891	1.20791	0.0544865	0.108973	0.272432	Rejected	Rejected	Enriched
Q8TCT9-1	Minor histocompatibility antigen H13 [OS=Homo sapiens]	1.22609	1.50205	0.0545405	0.109081	0.272703	Rejected	Rejected	Enriched
Q8NEF9	serum response factor-binding protein 1 [OS=Homo sapiens]	3.605	4.56977	0.0545946	0.109189	0.272973	Rejected	Rejected	Enriched
P46783	40S ribosomal protein S10 [OS=Homo sapiens]	1.35697	1.76533	0.0546486	0.109297	0.273243	Rejected	Rejected	Enriched
P11387	DNA topoisomerase 1 [OS=Homo sapiens]	1.79543	2.95981	0.0547027	0.109405	0.273514	Rejected	Rejected	Enriched
Q9Y678	Coatomer subunit gamma-1 [OS=Homo sapiens]	1.39637	2.14517	0.0547568	0.109514	0.273784	Rejected	Rejected	Enriched
Q9BZE9-2	Isoform 2 of Tether containing UBX domain for GLUT4 [OS=Homo sapiens]	1.1082	1.27607	0.0548108	0.109622	0.274054	Rejected	Rejected	Enriched
Q9NUU7	ATP-dependent RNA helicase DDX19A [OS=Homo sapiens]	1.09479	1.23512	0.0548649	0.10973	0.274324	Rejected	Rejected	Enriched
P54578	Ubiquitin carboxyl-terminal hydrolase 14 [OS=Homo sapiens]	1.5614	2.30292	0.0549189	0.109838	0.274595	Rejected	Rejected	Enriched
O60832-1	H/ACA ribonucleoprotein complex subunit 4 [OS=Homo sapiens]	1.12133	1.29316	0.054973	0.109946	0.274865	Rejected	Rejected	Enriched
Q96EP5	DAZ-associated protein 1 [OS=Homo sapiens]	1.08084	1.18889	0.055027	0.110054	0.275135	Rejected	Rejected	Enriched
P23396-1	40S ribosomal protein S3 [OS=Homo sapiens]	2.31425	3.38128	0.0550811	0.110162	0.275405	Rejected	Rejected	Enriched
Q9NYK5-2	Isoform 2 of 39S ribosomal protein L39, mitochondrial [OS=Homo sapiens]	1.06993	1.18641	0.0551351	0.11027	0.275676	Rejected	Rejected	Enriched
Q8IXB1-1	DnaJ homolog subfamily C member 10 [OS=Homo sapiens]	1.97178	2.89926	0.0551892	0.110378	0.275946	Rejected	Rejected	Enriched
P17980	26S protease regulatory subunit 6A [OS=Homo sapiens]	1.4558	2.48777	0.0552432	0.110486	0.276216	Rejected	Rejected	Enriched
P52292	Importin subunit alpha-1 [OS=Homo sapiens]	12.4372	19.9656	0.0552973	0.110595	0.276486	Rejected	Rejected	Enriched
Q15836	Vesicle-associated membrane protein 3 [OS=Homo sapiens]	2.03199	3.8989	0.0553514	0.110703	0.276757	Rejected	Rejected	Enriched
Q9NQP4	Prefoldin subunit 4 [OS=Homo sapiens]	1.09881	1.22049	0.0554054	0.110811	0.277027	Rejected	Rejected	Enriched
Q9NYU2-1	UDP-glucose:glycoprotein glucosyltransferase 1 [OS=Homo sapiens]	1.13974	1.26696	0.0554595	0.110919	0.277297	Rejected	Rejected	Enriched
Q14919-2	Isoform 2 of Dr1-associated corepressor [OS=Homo sapiens]	1.87066	2.40734	0.0555135	0.111027	0.277568	Rejected	Rejected	Enriched
Q8IX12	Cell division cycle and apoptosis regulator protein 1 [OS=Homo sapiens]	1.09718	1.2301	0.0555676	0.111135	0.277838	Rejected	Rejected	Enriched
P01111	GTPase NRas [OS=Homo sapiens]	1.4497	2.03741	0.0556216	0.111243	0.278108	Rejected	Rejected	Enriched
Q92538	Golgi-specific brefeldin A-resistance guanine nucleotide exchange factor 1 [OS=Homo sapiens]	1.79864	2.97872	0.0556757	0.111351	0.278378	Rejected	Rejected	Enriched
P61586	Transforming protein RhoA [OS=Homo sapiens]	1.08992	1.20704	0.0557297	0.111459	0.278649	Rejected	Rejected	Enriched
P12277	Creatine kinase B-type [OS=Homo sapiens]	1.44509	1.62189	0.0557838	0.111568	0.278919	Rejected	Rejected	Enriched
Q9Y320	Thioredoxin-related transmembrane protein 2 [OS=Homo sapiens]	1.10305	1.26373	0.0558378	0.111676	0.279189	Rejected	Rejected	Enriched
O43823	A-kinase anchor protein 8 [OS=Homo sapiens]	1.08164	1.21068	0.0558919	0.111784	0.279459	Rejected	Rejected	Enriched
Q13155	aminoacyl tRNA synthase complex-interacting multifunctional protein 2 [OS=Homo sapiens]	1.52552	2.01769	0.0559459	0.111892	0.27973	Rejected	Rejected	Enriched
Q96RS6	NudC domain-containing protein 1 [OS=Homo sapiens]	1.40367	2.28943	0.056	0.112	0.28	Rejected	Rejected	Enriched
Q4VC31	coiled-coil domain-containing protein 58 [OS=Homo sapiens]	1.10387	1.24944	0.0560541	0.112108	0.28027	Rejected	Rejected	Enriched
P50395-1	Rab GDP dissociation inhibitor beta [OS=Homo sapiens]	2.71991	2.96857	0.0561081	0.112216	0.280541	Rejected	Rejected	Enriched
P16070	CD44 antigen [OS=Homo sapiens]	2.25441	5.6085	0.0561622	0.112324	0.280811	Rejected	Rejected	Enriched
P61224-1	Ras-related protein Rap-1b [OS=Homo sapiens]	1.1597	1.34459	0.0562162	0.112432	0.281081	Rejected	Rejected	Enriched
P53621-2	Isoform 2 of Coatomer subunit alpha [OS=Homo sapiens]	1.26456	1.77648	0.0562703	0.112541	0.281351	Rejected	Rejected	Enriched
Q9UJ70-2	Isoform 2 of N-acetyl-D-glucosamine kinase [OS=Homo sapiens]	1.1544	1.42642	0.0563243	0.112649	0.281622	Rejected	Rejected	Enriched
Q14165	Malectin [OS=Homo sapiens]	1.07376	1.1874	0.0563784	0.112757	0.281892	Rejected	Rejected	Enriched
P16435	NADPH--cytochrome P450 reductase [OS=Homo sapiens]	1.08376	1.22642	0.0564324	0.112865	0.282162	Rejected	Rejected	Enriched
P26885	Peptidyl-prolyl cis-trans isomerase FKBP2 [OS=Homo sapiens]	1.11445	1.28023	0.0564865	0.112973	0.282432	Rejected	Rejected	Enriched
P14625	Endoplasmin [OS=Homo sapiens]	2.71517	3.45015	0.0565405	0.113081	0.282703	Rejected	Rejected	Enriched
Q9NXG2	THUMP domain-containing protein 1 [OS=Homo sapiens]	1.74881	3.24501	0.0565946	0.113189	0.282973	Rejected	Rejected	Enriched
P05386	60S acidic ribosomal protein P1 [OS=Homo sapiens]	1.08546	1.2263	0.0566486	0.113297	0.283243	Rejected	Rejected	Enriched
Q9NRX1	RNA-binding protein pno1 [OS=Homo sapiens]	1.093	1.26982	0.0567027	0.113405	0.283514	Rejected	Rejected	Enriched
O15173-2	Isoform 2 of Membrane-associated progesterone receptor component 2 [OS=Homo sapiens]	2.5825	4.16208	0.0567568	0.113514	0.283784	Rejected	Rejected	Enriched
Q13868	Exosome complex component Rrp4 [OS=Homo sapiens]	1.11377	1.3092	0.0568108	0.113622	0.284054	Rejected	Rejected	Enriched
Q9HAV7	GrpE protein homolog 1, mitochondrial [OS=Homo sapiens]	1.25647	1.88824	0.0568649	0.11373	0.284324	Rejected	Rejected	Enriched
Q13724-1	Mannosyl-oligosaccharide glucosidase [OS=Homo sapiens]	1.07259	1.19673	0.0569189	0.113838	0.284595	Rejected	Rejected	Enriched
Q01581	hydroxymethylglutaryl-CoA synthase, cytoplasmic [OS=Homo sapiens]	1.73911	2.0044	0.056973	0.113946	0.284865	Rejected	Rejected	Enriched
Q08257	Quinone oxidoreductase [OS=Homo sapiens]	1.10637	1.29228	0.057027	0.114054	0.285135	Rejected	Rejected	Enriched
Q12904-2	Isoform 2 of Aminoacyl tRNA synthase complex-interacting multifunctional protein 1 [OS=Homo sapiens]	1.42223	2.13557	0.0570811	0.114162	0.285405	Rejected	Rejected	Enriched
P53396-1	ATP-citrate synthase [OS=Homo sapiens]	1.43789	2.36502	0.0571351	0.11427	0.285676	Rejected	Rejected	Enriched
Q13596-3	Isoform 3 of Sorting nexin-1 [OS=Homo sapiens]	1.35663	2.27506	0.0571892	0.114378	0.285946	Rejected	Rejected	Enriched
P55735-3	Isoform 3 of Protein SEC13 homolog [OS=Homo sapiens]	1.54202	2.27584	0.0572432	0.114486	0.286216	Rejected	Rejected	Enriched
Q14974	Importin subunit beta-1 [OS=Homo sapiens]	4.6658	8.39987	0.0572973	0.114595	0.286486	Rejected	Rejected	Enriched
Q96HC4-6	Isoform 6 of PDZ and LIM domain protein 5 [OS=Homo sapiens]	1.08827	1.23272	0.0573514	0.114703	0.286757	Rejected	Rejected	Enriched
P48047	ATP synthase subunit O, mitochondrial [OS=Homo sapiens]	1.10569	1.30179	0.0574054	0.114811	0.287027	Rejected	Rejected	Enriched
Q9P0M6	Core histone macro-H2A.2 [OS=Homo sapiens]	1.08584	1.25401	0.0574595	0.114919	0.287297	Rejected	Rejected	Enriched
Q13418	Integrin-linked protein kinase [OS=Homo sapiens]	1.12243	1.33245	0.0575135	0.115027	0.287568	Rejected	Rejected	Enriched
P83111-1	Serine beta-lactamase-like protein LACTB, mitochondrial [OS=Homo sapiens]	1.60895	3.12982	0.0575676	0.115135	0.287838	Rejected	Rejected	Enriched
P28072	Proteasome subunit beta type-6 [OS=Homo sapiens]	1.30753	1.59628	0.0576216	0.115243	0.288108	Rejected	Rejected	Enriched
P62081	40S ribosomal protein S7 [OS=Homo sapiens]	1.19054	1.50769	0.0576757	0.115351	0.288378	Rejected	Rejected	Enriched
Q99661-1	Kinesin-like protein KIF2C [OS=Homo sapiens]	1.51999	1.83266	0.0577297	0.115459	0.288649	Rejected	Rejected	Enriched
Q96GG9	DCN1-like protein 1 [OS=Homo sapiens]	1.09415	1.24542	0.0577838	0.115568	0.288919	Rejected	Rejected	Enriched
Q14694-2	Isoform 2 of Ubiquitin carboxyl-terminal hydrolase 10 [OS=Homo sapiens]	1.09985	1.2613	0.0578378	0.115676	0.289189	Rejected	Rejected	Enriched
Q9Y570-4	Isoform 4 of Protein phosphatase methylesterase 1 [OS=Homo sapiens]	1.22184	1.66935	0.0578919	0.115784	0.289459	Rejected	Rejected	Enriched
P08579	U2 small nuclear ribonucleoprotein B'' [OS=Homo sapiens]	1.1354	1.37428	0.0579459	0.115892	0.28973	Rejected	Rejected	Enriched
P56545-2	Isoform 2 of C-terminal-binding protein 2 [OS=Homo sapiens]	1.20748	1.62318	0.058	0.116	0.29	Rejected	Rejected	Enriched
P35270	Sepiapterin reductase [OS=Homo sapiens]	1.09177	1.26243	0.0580541	0.116108	0.29027	Rejected	Rejected	Enriched
P10619	lysosomal protective protein [OS=Homo sapiens]	2.22004	2.57198	0.0581081	0.116216	0.290541	Rejected	Rejected	Enriched
Q9P0K7-2	Isoform 2 of Ankycorbin [OS=Homo sapiens]	1.22537	1.45083	0.0581622	0.116324	0.290811	Rejected	Rejected	Enriched
P62314	Small nuclear ribonucleoprotein Sm D1 [OS=Homo sapiens]	1.08867	1.28469	0.0582162	0.116432	0.291081	Rejected	Rejected	Enriched
Q13153-2	Isoform 2 of Serine/threonine-protein kinase PAK 1 [OS=Homo sapiens]	1.27952	1.78512	0.0582703	0.116541	0.291351	Rejected	Rejected	Enriched
Q9NWH9-1	SAFB-like transcription modulator [OS=Homo sapiens]	1.09377	1.2768	0.0583243	0.116649	0.291622	Rejected	Rejected	Enriched
Q9Y618-1	Nuclear receptor corepressor 2 [OS=Homo sapiens]	1.27005	1.57253	0.0583784	0.116757	0.291892	Rejected	Rejected	Enriched
Q9NZ45	CDGSH iron-sulfur domain-containing protein 1 [OS=Homo sapiens]	1.95121	2.25587	0.0584324	0.116865	0.292162	Rejected	Rejected	Enriched
P49750-4	Isoform 4 of YLP motif-containing protein 1 [OS=Homo sapiens]	1.07618	1.19946	0.0584865	0.116973	0.292432	Rejected	Rejected	Enriched
Q8WZA9	Immunity-related GTPase family Q protein [OS=Homo sapiens]	1.08467	1.23671	0.0585405	0.117081	0.292703	Rejected	Rejected	Enriched
P09960-1	leukotriene A-4 hydrolase [OS=Homo sapiens]	1.24933	1.85949	0.0585946	0.117189	0.292973	Rejected	Rejected	Enriched
P13797	Plastin-3 [OS=Homo sapiens]	1.14533	1.33926	0.0586486	0.117297	0.293243	Rejected	Rejected	Enriched
Q9H223	EH domain-containing protein 4 [OS=Homo sapiens]	1.07592	1.24402	0.0587027	0.117405	0.293514	Rejected	Rejected	Enriched
Q8NBQ5	Estradiol 17-beta-dehydrogenase 11 [OS=Homo sapiens]	1.0682	1.22328	0.0587568	0.117514	0.293784	Rejected	Rejected	Enriched
Q14202	Zinc finger MYM-type protein 3 [OS=Homo sapiens]	1.14126	1.47762	0.0588108	0.117622	0.294054	Rejected	Rejected	Enriched
Q96T37-1	Putative RNA-binding protein 15 [OS=Homo sapiens]	1.06304	1.24535	0.0588649	0.11773	0.294324	Rejected	Rejected	Enriched
Q9UDW1	cytochrome b-c1 complex subunit 9 [OS=Homo sapiens]	1.0683	1.23143	0.0589189	0.117838	0.294595	Rejected	Rejected	Enriched
P30837	Aldehyde dehydrogenase X, mitochondrial [OS=Homo sapiens]	1.08345	1.24369	0.058973	0.117946	0.294865	Rejected	Rejected	Enriched
Q9Y617-1	phosphoserine aminotransferase [OS=Homo sapiens]	1.06821	1.21677	0.059027	0.118054	0.295135	Rejected	Rejected	Enriched
P06753-2	Isoform 2 of Tropomyosin alpha-3 chain [OS=Homo sapiens]	1.07054	1.19594	0.0590811	0.118162	0.295405	Rejected	Rejected	Enriched
O43396	Thioredoxin-like protein 1 [OS=Homo sapiens]	1.17112	1.62493	0.0591351	0.11827	0.295676	Rejected	Rejected	Enriched
Q9P2J5	Leucine--tRNA ligase, cytoplasmic [OS=Homo sapiens]	1.18958	1.42921	0.0591892	0.118378	0.295946	Rejected	Rejected	Enriched
P07237	Protein disulfide-isomerase [OS=Homo sapiens]	1.18222	1.6056	0.0592432	0.118486	0.296216	Rejected	Rejected	Enriched
Q13257-1	Mitotic spindle assembly checkpoint protein MAD2A [OS=Homo sapiens]	1.10104	1.34875	0.0592973	0.118595	0.296486	Rejected	Rejected	Enriched
P43121	Cell surface glycoprotein MUC18 [OS=Homo sapiens]	1.08395	1.23111	0.0593514	0.118703	0.296757	Rejected	Rejected	Enriched
P01892	HLA class I histocompatibility antigen, A-2 alpha chain [OS=Homo sapiens]	1.06728	1.21048	0.0594054	0.118811	0.297027	Rejected	Rejected	Enriched
Q9UIG0	Tyrosine-protein kinase BAZ1B [OS=Homo sapiens]	1.05694	1.19786	0.0594595	0.118919	0.297297	Rejected	Rejected	Enriched
P54709	sodium/potassium-transporting ATPase subunit beta-3 [OS=Homo sapiens]	1.14263	1.41197	0.0595135	0.119027	0.297568	Rejected	Rejected	Enriched
P62750	60S ribosomal protein L23a [OS=Homo sapiens]	1.08604	1.30483	0.0595676	0.119135	0.297838	Rejected	Rejected	Rejected
O00161	Synaptosomal-associated protein 23 [OS=Homo sapiens]	1.13002	1.38298	0.0596216	0.119243	0.298108	Rejected	Rejected	Rejected
Q9HB71	Calcyclin-binding protein [OS=Homo sapiens]	1.21076	1.77761	0.0596757	0.119351	0.298378	Rejected	Rejected	Rejected
Q9UBM7	7-dehydrocholesterol reductase [OS=Homo sapiens]	1.14815	1.62638	0.0597297	0.119459	0.298649	Rejected	Rejected	Rejected
P68032	Actin, alpha cardiac muscle 1 [OS=Homo sapiens]	1.56377	1.7851	0.0597838	0.119568	0.298919	Rejected	Rejected	Rejected
Q86U42-1	polyadenylate-binding protein 2 [OS=Homo sapiens]	1.22772	1.9995	0.0598378	0.119676	0.299189	Rejected	Rejected	Rejected
P41227-1	N-alpha-acetyltransferase 10 [OS=Homo sapiens]	1.26543	2.15787	0.0598919	0.119784	0.299459	Rejected	Rejected	Rejected
P13667	Protein disulfide-isomerase A4 [OS=Homo sapiens]	1.4634	2.68756	0.0599459	0.119892	0.29973	Rejected	Rejected	Rejected
O15400	Syntaxin-7 [OS=Homo sapiens]	1.24795	2.17882	0.06	0.12	0.3	Rejected	Rejected	Rejected
P25705-1	ATP synthase subunit alpha, mitochondrial [OS=Homo sapiens]	1.42266	2.29279	0.0600541	0.120108	0.30027	Rejected	Rejected	Rejected
Q86X51	Uncharacterized protein CXorf67 [OS=Homo sapiens]	1.08922	1.24651	0.0601081	0.120216	0.300541	Rejected	Rejected	Rejected
P18754-2	Isoform 2 of Regulator of chromosome condensation [OS=Homo sapiens]	1.14936	1.28304	0.0601622	0.120324	0.300811	Rejected	Rejected	Rejected
P30519	Heme oxygenase 2 [OS=Homo sapiens]	1.24006	2.13381	0.0602162	0.120432	0.301081	Rejected	Rejected	Rejected
P24539	ATP synthase F(0) complex subunit B1, mitochondrial [OS=Homo sapiens]	1.0642	1.22542	0.0602703	0.120541	0.301351	Rejected	Rejected	Rejected
P06702	Protein S100-A9 [OS=Homo sapiens]	3.72947	5.61133	0.0603243	0.120649	0.301622	Rejected	Rejected	Rejected
Q9H0D6-1	5'-3' exoribonuclease 2 [OS=Homo sapiens]	1.17846	1.74147	0.0603784	0.120757	0.301892	Rejected	Rejected	Rejected
P31151	Protein S100-A7 [OS=Homo sapiens]	1.7846	3.91511	0.0604324	0.120865	0.302162	Rejected	Rejected	Rejected
Q9Y3D9	28S ribosomal protein S23, mitochondrial [OS=Homo sapiens]	1.09688	1.35075	0.0604865	0.120973	0.302432	Rejected	Rejected	Rejected
O15031	Plexin-B2 [OS=Homo sapiens]	1.1159	1.38245	0.0605405	0.121081	0.302703	Rejected	Rejected	Rejected
Q15121-2	Isoform 2 of Astrocytic phosphoprotein PEA-15 [OS=Homo sapiens]	1.12659	1.56656	0.0605946	0.121189	0.302973	Rejected	Rejected	Rejected
Q96CT7	Coiled-coil domain-containing protein 124 [OS=Homo sapiens]	1.71016	2.69796	0.0606486	0.121297	0.303243	Rejected	Rejected	Rejected
P11717	Cation-independent mannose-6-phosphate receptor [OS=Homo sapiens]	1.1716	1.54727	0.0607027	0.121405	0.303514	Rejected	Rejected	Rejected
P35250-1	Replication factor C subunit 2 [OS=Homo sapiens]	1.07077	1.28911	0.0607568	0.121514	0.303784	Rejected	Rejected	Rejected
P12236	ADP/ATP translocase 3 [OS=Homo sapiens]	1.85658	2.04796	0.0608108	0.121622	0.304054	Rejected	Rejected	Rejected
Q14240-2	Isoform 2 of Eukaryotic initiation factor 4A-II [OS=Homo sapiens]	1.07443	1.28707	0.0608649	0.12173	0.304324	Rejected	Rejected	Rejected
Q969T4	Ubiquitin-conjugating enzyme E2 E3 [OS=Homo sapiens]	1.09015	1.32263	0.0609189	0.121838	0.304595	Rejected	Rejected	Rejected
Q9NZT2-1	opioid growth factor receptor [OS=Homo sapiens]	1.49753	1.78823	0.060973	0.121946	0.304865	Rejected	Rejected	Rejected
Q9Y5K6	CD2-associated protein [OS=Homo sapiens]	1.68956	2.02157	0.061027	0.122054	0.305135	Rejected	Rejected	Rejected
P31025	Lipocalin-1 [OS=Homo sapiens]	1.05349	1.21323	0.0610811	0.122162	0.305405	Rejected	Rejected	Rejected
P31939	bifunctional purine biosynthesis protein purH [OS=Homo sapiens]	1.37053	2.32208	0.0611351	0.12227	0.305676	Rejected	Rejected	Rejected
Q9UBR2	Cathepsin Z [OS=Homo sapiens]	1.65459	2.37598	0.0611892	0.122378	0.305946	Rejected	Rejected	Rejected
Q9Y2W2	WW domain-binding protein 11 [OS=Homo sapiens]	1.15096	1.69557	0.0612432	0.122486	0.306216	Rejected	Rejected	Rejected
P46926	glucosamine-6-phosphate isomerase 1 [OS=Homo sapiens]	1.20573	1.83793	0.0612973	0.122595	0.306486	Rejected	Rejected	Rejected
P55884-2	Isoform 2 of Eukaryotic translation initiation factor 3 subunit B [OS=Homo sapiens]	1.25701	2.45891	0.0613514	0.122703	0.306757	Rejected	Rejected	Rejected
O60502	protein O-GlcNAcase [OS=Homo sapiens]	1.08305	1.26461	0.0614054	0.122811	0.307027	Rejected	Rejected	Rejected
O14908-1	PDZ domain-containing protein GIPC1 [OS=Homo sapiens]	1.18722	1.76527	0.0614595	0.122919	0.307297	Rejected	Rejected	Rejected
P25686-3	DnaJ homolog subfamily B member 2 [OS=Homo sapiens]	1.57807	1.92285	0.0615135	0.123027	0.307568	Rejected	Rejected	Rejected
Q14157-5	Isoform 5 of Ubiquitin-associated protein 2-like [OS=Homo sapiens]	1.13172	1.60475	0.0615676	0.123135	0.307838	Rejected	Rejected	Rejected
Q9NX58	Cell growth-regulating nucleolar protein [OS=Homo sapiens]	1.32971	2.13281	0.0616216	0.123243	0.308108	Rejected	Rejected	Rejected
Q15436	protein transport protein Sec23A [OS=Homo sapiens]	1.05674	1.21507	0.0616757	0.123351	0.308378	Rejected	Rejected	Rejected
P43246-1	DNA mismatch repair protein MSH2 [OS=Homo sapiens]	3.02611	3.86587	0.0617297	0.123459	0.308649	Rejected	Rejected	Rejected
P41208	centrin-2 [OS=Homo sapiens]	1.41781	1.92041	0.0617838	0.123568	0.308919	Rejected	Rejected	Rejected
Q6GMV2	SET and MYND domain-containing protein 5 [OS=Homo sapiens]	1.06909	1.29849	0.0618378	0.123676	0.309189	Rejected	Rejected	Rejected
O75822	Eukaryotic translation initiation factor 3 subunit J [OS=Homo sapiens]	1.3639	2.30153	0.0618919	0.123784	0.309459	Rejected	Rejected	Rejected
P14927	Cytochrome b-c1 complex subunit 7 [OS=Homo sapiens]	1.12535	1.51767	0.0619459	0.123892	0.30973	Rejected	Rejected	Rejected
P41567	eukaryotic translation initiation factor 1 [OS=Homo sapiens]	2.19039	2.66247	0.062	0.124	0.31	Rejected	Rejected	Rejected
Q99729-3	Isoform 3 of Heterogeneous nuclear ribonucleoprotein A/B [OS=Homo sapiens]	1.06154	1.28241	0.0620541	0.124108	0.31027	Rejected	Rejected	Rejected
P33316-3	Deoxyuridine 5'-triphosphate nucleotidohydrolase, mitochondrial [OS=Homo sapiens]	1.17165	1.84597	0.0621081	0.124216	0.310541	Rejected	Rejected	Rejected
Q9P035	Very-long-chain (3R)-3-hydroxyacyl-CoA dehydratase 3 [OS=Homo sapiens]	1.19333	1.55944	0.0621622	0.124324	0.310811	Rejected	Rejected	Rejected
Q92878-2	Isoform 2 of DNA repair protein RAD50 [OS=Homo sapiens]	1.05058	1.2134	0.0622162	0.124432	0.311081	Rejected	Rejected	Rejected
Q9H2P0	Activity-dependent neuroprotector homeobox protein [OS=Homo sapiens]	1.04473	1.19489	0.0622703	0.124541	0.311351	Rejected	Rejected	Rejected
P21912	Succinate dehydrogenase [ubiquinone] iron-sulfur subunit, mitochondrial [OS=Homo sapiens]	1.07519	1.32408	0.0623243	0.124649	0.311622	Rejected	Rejected	Rejected
O75153	Clustered mitochondria protein homolog [OS=Homo sapiens]	1.05207	1.27526	0.0623784	0.124757	0.311892	Rejected	Rejected	Rejected
P21980	Protein-glutamine gamma-glutamyltransferase 2 [OS=Homo sapiens]	1.16939	2.29842	0.0624324	0.124865	0.312162	Rejected	Rejected	Rejected
Q92804-1	TATA-binding protein-associated factor 2N [OS=Homo sapiens]	1.06652	1.29034	0.0624865	0.124973	0.312432	Rejected	Rejected	Rejected
Q9UM54-6	Isoform 6 of Unconventional myosin-VI [OS=Homo sapiens]	1.04334	1.19263	0.0625405	0.125081	0.312703	Rejected	Rejected	Rejected
Q05682-5	Isoform 5 of Caldesmon [OS=Homo sapiens]	3.83265	6.18613	0.0625946	0.125189	0.312973	Rejected	Rejected	Rejected
O95373	Importin-7 [OS=Homo sapiens]	1.14113	1.7709	0.0626486	0.125297	0.313243	Rejected	Rejected	Rejected
O75396	Vesicle-trafficking protein SEC22b [OS=Homo sapiens]	1.18218	1.58758	0.0627027	0.125405	0.313514	Rejected	Rejected	Rejected
Q9NPQ8-3	Isoform 3 of Synembryn-A [OS=Homo sapiens]	1.74511	2.23395	0.0627568	0.125514	0.313784	Rejected	Rejected	Rejected
Q7Z417	Nuclear fragile X mental retardation-interacting protein 2 [OS=Homo sapiens]	1.12985	1.71177	0.0628108	0.125622	0.314054	Rejected	Rejected	Rejected
O15347	High mobility group protein B3 [OS=Homo sapiens]	1.03573	1.20922	0.0628649	0.12573	0.314324	Rejected	Rejected	Rejected
Q92616	eIF-2-alpha kinase activator GCN1 [OS=Homo sapiens]	1.54866	2.63661	0.0629189	0.125838	0.314595	Rejected	Rejected	Rejected
Q86XR7-2	Isoform 2 of TIR domain-containing adapter molecule 2 [OS=Homo sapiens]	1.35882	1.66987	0.062973	0.125946	0.314865	Rejected	Rejected	Rejected
Q9Y608	Leucine-rich repeat flightless-interacting protein 2 [OS=Homo sapiens]	1.05662	1.25164	0.063027	0.126054	0.315135	Rejected	Rejected	Rejected
Q13685	angio-associated migratory cell protein [OS=Homo sapiens]	1.30306	1.57368	0.0630811	0.126162	0.315405	Rejected	Rejected	Rejected
P62805	histone H4 [OS=Homo sapiens]	1.0963	1.37554	0.0631351	0.12627	0.315676	Rejected	Rejected	Rejected
P00492	Hypoxanthine-guanine phosphoribosyltransferase [OS=Homo sapiens]	1.05794	1.28284	0.0631892	0.126378	0.315946	Rejected	Rejected	Rejected
P63104-1	14-3-3 protein zeta/delta [OS=Homo sapiens]	1.07625	1.44868	0.0632432	0.126486	0.316216	Rejected	Rejected	Rejected
P62269	40S ribosomal protein S18 [OS=Homo sapiens]	1.32971	1.65279	0.0632973	0.126595	0.316486	Rejected	Rejected	Rejected
P23921	Ribonucleoside-diphosphate reductase large subunit [OS=Homo sapiens]	1.05686	1.30568	0.0633514	0.126703	0.316757	Rejected	Rejected	Rejected
P01023	alpha-2-macroglobulin [OS=Homo sapiens]	1.05531	1.24667	0.0634054	0.126811	0.317027	Rejected	Rejected	Rejected
P63208	s-phase kinase-associated protein 1 [OS=Homo sapiens]	1.04774	1.22587	0.0634595	0.126919	0.317297	Rejected	Rejected	Rejected
Q16537	Serine/threonine-protein phosphatase 2A 56 kDa regulatory subunit epsilon isoform [OS=Homo sapiens]	1.15233	1.93508	0.0635135	0.127027	0.317568	Rejected	Rejected	Rejected
Q92785	Zinc finger protein ubi-d4 [OS=Homo sapiens]	1.04155	1.21781	0.0635676	0.127135	0.317838	Rejected	Rejected	Rejected
Q9Y4W6	AFG3-like protein 2 [OS=Homo sapiens]	1.31012	4.24404	0.0636216	0.127243	0.318108	Rejected	Rejected	Rejected
P30405	Peptidyl-prolyl cis-trans isomerase F, mitochondrial [OS=Homo sapiens]	1.60427	1.90461	0.0636757	0.127351	0.318378	Rejected	Rejected	Rejected
Q12788	Transducin beta-like protein 3 [OS=Homo sapiens]	1.04708	1.23001	0.0637297	0.127459	0.318649	Rejected	Rejected	Rejected
O76021	Ribosomal L1 domain-containing protein 1 [OS=Homo sapiens]	3.24926	5.17713	0.0637838	0.127568	0.318919	Rejected	Rejected	Rejected
Q9NZ01-1	Very-long-chain enoyl-CoA reductase [OS=Homo sapiens]	1.03881	1.21519	0.0638378	0.127676	0.319189	Rejected	Rejected	Rejected
Q99436	Proteasome subunit beta type-7 [OS=Homo sapiens]	1.10017	1.46351	0.0638919	0.127784	0.319459	Rejected	Rejected	Rejected
Q8NCA5	protein FAM98A [OS=Homo sapiens]	1.58901	14.2684	0.0639459	0.127892	0.31973	Rejected	Rejected	Rejected
P82930	28S ribosomal protein S34, mitochondrial [OS=Homo sapiens]	1.05889	1.26007	0.064	0.128	0.32	Rejected	Rejected	Rejected
O14950	Myosin regulatory light chain 12B [OS=Homo sapiens]	2.57828	5.17067	0.0640541	0.128108	0.32027	Rejected	Rejected	Rejected
Q9BV86-1	N-terminal Xaa-Pro-Lys N-methyltransferase 1 [OS=Homo sapiens]	1.04771	1.26211	0.0641081	0.128216	0.320541	Rejected	Rejected	Rejected
O60271	C-jun-amino-terminal kinase-interacting protein 4 [OS=Homo sapiens]	1.04018	1.18791	0.0641622	0.128324	0.320811	Rejected	Rejected	Rejected
P61970	nuclear transport factor 2 [OS=Homo sapiens]	1.03416	1.20978	0.0642162	0.128432	0.321081	Rejected	Rejected	Rejected
O60313-2	Isoform 2 of Dynamin-like 120 kDa protein, mitochondrial [OS=Homo sapiens]	1.56518	1.94921	0.0642703	0.128541	0.321351	Rejected	Rejected	Rejected
Q86XP3-1	ATP-dependent RNA helicase DDX42 [OS=Homo sapiens]	1.02902	1.16561	0.0643243	0.128649	0.321622	Rejected	Rejected	Rejected
O75348	V-type proton ATPase subunit G 1 [OS=Homo sapiens]	1.0518	1.28022	0.0643784	0.128757	0.321892	Rejected	Rejected	Rejected
O00148	ATP-dependent RNA helicase DDX39A [OS=Homo sapiens]	1.72166	2.05429	0.0644324	0.128865	0.322162	Rejected	Rejected	Rejected
Q9NR30-1	Nucleolar RNA helicase 2 [OS=Homo sapiens]	1.19413	1.74846	0.0644865	0.128973	0.322432	Rejected	Rejected	Rejected
P02545	Prelamin-A/C [OS=Homo sapiens]	1.54717	2.04219	0.0645405	0.129081	0.322703	Rejected	Rejected	Rejected
O14773	Tripeptidyl-peptidase 1 [OS=Homo sapiens]	1.04139	1.24589	0.0645946	0.129189	0.322973	Rejected	Rejected	Rejected
P40692-1	DNA mismatch repair protein MLH1 [OS=Homo sapiens]	1.04951	1.2754	0.0646486	0.129297	0.323243	Rejected	Rejected	Rejected
P84085	ADP-ribosylation factor 5 [OS=Homo sapiens]	1.0573	1.28121	0.0647027	0.129405	0.323514	Rejected	Rejected	Rejected
Q8NI36	WD repeat-containing protein 36 [OS=Homo sapiens]	1.38001	1.85548	0.0647568	0.129514	0.323784	Rejected	Rejected	Rejected
Q9Y394	Dehydrogenase/reductase SDR family member 7 [OS=Homo sapiens]	1.06204	1.58916	0.0648108	0.129622	0.324054	Rejected	Rejected	Rejected
Q68CZ2-1	Tensin-3 [OS=Homo sapiens]	1.0415	1.24965	0.0648649	0.12973	0.324324	Rejected	Rejected	Rejected
Q86VM9	Zinc finger CCCH domain-containing protein 18 [OS=Homo sapiens]	1.02289	1.18135	0.0649189	0.129838	0.324595	Rejected	Rejected	Rejected
O43242	26S proteasome non-ATPase regulatory subunit 3 [OS=Homo sapiens]	1.15872	1.54069	0.064973	0.129946	0.324865	Rejected	Rejected	Rejected
Q9H3K2	Growth hormone-inducible transmembrane protein [OS=Homo sapiens]	6.30448	7.1451	0.065027	0.130054	0.325135	Rejected	Rejected	Rejected
P07602-3	Isoform Sap-mu-9 of Prosaposin [OS=Homo sapiens]	1.44685	1.84002	0.0650811	0.130162	0.325405	Rejected	Rejected	Rejected
Q9Y295	developmentally-regulated GTP-binding protein 1 [OS=Homo sapiens]	1.05619	1.31063	0.0651351	0.13027	0.325676	Rejected	Rejected	Rejected
P50750-2	Isoform 2 of Cyclin-dependent kinase 9 [OS=Homo sapiens]	1.04227	1.25859	0.0651892	0.130378	0.325946	Rejected	Rejected	Rejected
P46734-3	Isoform 2 of Dual specificity mitogen-activated protein kinase kinase 3 [OS=Homo sapiens]	1.04232	1.23507	0.0652432	0.130486	0.326216	Rejected	Rejected	Rejected
Q9UNN5-1	fas-associated factor 1 [OS=Homo sapiens]	1.04468	1.27486	0.0652973	0.130595	0.326486	Rejected	Rejected	Rejected
Q13620	Cullin-4B [OS=Homo sapiens]	1.20804	2.44975	0.0653514	0.130703	0.326757	Rejected	Rejected	Rejected
Q9BR76	Coronin-1B [OS=Homo sapiens]	1.35669	5.00602	0.0654054	0.130811	0.327027	Rejected	Rejected	Rejected
P35610	sterol O-acyltransferase 1 [OS=Homo sapiens]	1.04649	1.26656	0.0654595	0.130919	0.327297	Rejected	Rejected	Rejected
P08574	Cytochrome c1, heme protein, mitochondrial [OS=Homo sapiens]	1.05591	1.34864	0.0655135	0.131027	0.327568	Rejected	Rejected	Rejected
P07195	L-lactate dehydrogenase B chain [OS=Homo sapiens]	1.08095	1.37667	0.0655676	0.131135	0.327838	Rejected	Rejected	Rejected
P19784	casein kinase II subunit alpha' [OS=Homo sapiens]	1.02994	1.20422	0.0656216	0.131243	0.328108	Rejected	Rejected	Rejected
Q9NT62	ubiquitin-like-conjugating enzyme ATG3 [OS=Homo sapiens]	1.04971	1.27803	0.0656757	0.131351	0.328378	Rejected	Rejected	Rejected
Q32MZ4	Leucine-rich repeat flightless-interacting protein 1 [OS=Homo sapiens]	1.09024	1.69843	0.0657297	0.131459	0.328649	Rejected	Rejected	Rejected
P40121	Macrophage-capping protein [OS=Homo sapiens]	1.0997	1.75214	0.0657838	0.131568	0.328919	Rejected	Rejected	Rejected
Q8N806	Putative E3 ubiquitin-protein ligase UBR7 [OS=Homo sapiens]	1.0433	1.27031	0.0658378	0.131676	0.329189	Rejected	Rejected	Rejected
Q5U5X0	Complex III assembly factor LYRM7 [OS=Homo sapiens]	1.03994	1.2984	0.0658919	0.131784	0.329459	Rejected	Rejected	Rejected
O43776	Asparagine--tRNA ligase, cytoplasmic [OS=Homo sapiens]	1.03245	1.19579	0.0659459	0.131892	0.32973	Rejected	Rejected	Rejected
Q7Z5L9-1	Interferon regulatory factor 2-binding protein 2 [OS=Homo sapiens]	1.03482	1.26267	0.066	0.132	0.33	Rejected	Rejected	Rejected
O14617-5	Isoform 5 of AP-3 complex subunit delta-1 [OS=Homo sapiens]	1.03519	1.23429	0.0660541	0.132108	0.33027	Rejected	Rejected	Rejected
Q9NP79	Vacuolar protein sorting-associated protein VTA1 homolog [OS=Homo sapiens]	1.05577	1.2941	0.0661081	0.132216	0.330541	Rejected	Rejected	Rejected
P42566-1	epidermal growth factor receptor substrate 15 [OS=Homo sapiens]	1.01496	1.13098	0.0661622	0.132324	0.330811	Rejected	Rejected	Rejected
Q9UQE7	Structural maintenance of chromosomes protein 3 [OS=Homo sapiens]	1.57499	2.45185	0.0662162	0.132432	0.331081	Rejected	Rejected	Rejected
Q9UBE0-1	SUMO-activating enzyme subunit 1 [OS=Homo sapiens]	1.07348	1.58166	0.0662703	0.132541	0.331351	Rejected	Rejected	Rejected
Q02218	2-oxoglutarate dehydrogenase, mitochondrial [OS=Homo sapiens]	1.82026	2.57136	0.0663243	0.132649	0.331622	Rejected	Rejected	Rejected
Q9H0S4	Probable ATP-dependent RNA helicase DDX47 [OS=Homo sapiens]	1.16784	1.56953	0.0663784	0.132757	0.331892	Rejected	Rejected	Rejected
O15446-2	Isoform 2 of DNA-directed RNA polymerase I subunit RPA34 [OS=Homo sapiens]	1.05138	1.2787	0.0664324	0.132865	0.332162	Rejected	Rejected	Rejected
P49841-2	Isoform 2 of Glycogen synthase kinase-3 beta [OS=Homo sapiens]	1.02977	1.24354	0.0664865	0.132973	0.332432	Rejected	Rejected	Rejected
P37198	nuclear pore glycoprotein p62 [OS=Homo sapiens]	1.03099	1.23964	0.0665405	0.133081	0.332703	Rejected	Rejected	Rejected
O43847-2	Isoform 2 of Nardilysin [OS=Homo sapiens]	1.03049	1.21074	0.0665946	0.133189	0.332973	Rejected	Rejected	Rejected
P61247	40S ribosomal protein S3a [OS=Homo sapiens]	1.16617	2.73423	0.0666486	0.133297	0.333243	Rejected	Rejected	Rejected
P82970	High mobility group nucleosome-binding domain-containing protein 5 [OS=Homo sapiens]	1.03316	1.2648	0.0667027	0.133405	0.333514	Rejected	Rejected	Rejected
Q96K17-1	transcription factor BTF3 homolog 4 [OS=Homo sapiens]	1.02737	1.24971	0.0667568	0.133514	0.333784	Rejected	Rejected	Rejected
Q96S97	myeloid-associated differentiation marker [OS=Homo sapiens]	1.04126	1.33407	0.0668108	0.133622	0.334054	Rejected	Rejected	Rejected
P12270	Nucleoprotein TPR [OS=Homo sapiens]	1.08578	2.28654	0.0668649	0.13373	0.334324	Rejected	Rejected	Rejected
Q04637-9	Isoform 9 of Eukaryotic translation initiation factor 4 gamma 1 [OS=Homo sapiens]	1.02707	1.29404	0.0669189	0.133838	0.334595	Rejected	Rejected	Rejected
O43148-2	Isoform 2 of mRNA cap guanine-N7 methyltransferase [OS=Homo sapiens]	1.032	1.29943	0.066973	0.133946	0.334865	Rejected	Rejected	Rejected
Q92769	Histone deacetylase 2 [OS=Homo sapiens]	1.02654	1.1961	0.067027	0.134054	0.335135	Rejected	Rejected	Rejected
Q9UEY8-1	Gamma-adducin [OS=Homo sapiens]	1.03173	1.30062	0.0670811	0.134162	0.335405	Rejected	Rejected	Rejected
P61011-1	signal recognition particle 54 kDa protein [OS=Homo sapiens]	1.03517	1.31084	0.0671351	0.13427	0.335676	Rejected	Rejected	Rejected
P51148-2	Isoform 2 of Ras-related protein Rab-5C [OS=Homo sapiens]	1.06497	1.67768	0.0671892	0.134378	0.335946	Rejected	Rejected	Rejected
Q53FA7-1	Quinone oxidoreductase PIG3 [OS=Homo sapiens]	1.02159	1.24956	0.0672432	0.134486	0.336216	Rejected	Rejected	Rejected
Q9UKF6	Cleavage and polyadenylation specificity factor subunit 3 [OS=Homo sapiens]	1.02118	1.20526	0.0672973	0.134595	0.336486	Rejected	Rejected	Rejected
Q14258	E3 ubiquitin/ISG15 ligase TRIM25 [OS=Homo sapiens]	2.86083	3.48384	0.0673514	0.134703	0.336757	Rejected	Rejected	Rejected
P00505	Aspartate aminotransferase, mitochondrial [OS=Homo sapiens]	1.1174	1.53945	0.0674054	0.134811	0.337027	Rejected	Rejected	Rejected
Q13347	Eukaryotic translation initiation factor 3 subunit I [OS=Homo sapiens]	1.02569	1.31629	0.0674595	0.134919	0.337297	Rejected	Rejected	Rejected
Q12906-7	Isoform 7 of Interleukin enhancer-binding factor 3 [OS=Homo sapiens]	1.05242	1.71875	0.0675135	0.135027	0.337568	Rejected	Rejected	Rejected
Q6GMV3	Putative peptidyl-tRNA hydrolase PTRHD1 [OS=Homo sapiens]	1.54817	1.7587	0.0675676	0.135135	0.337838	Rejected	Rejected	Rejected
P18085	ADP-ribosylation factor 4 [OS=Homo sapiens]	1.33596	48.8329	0.0676216	0.135243	0.338108	Rejected	Rejected	Rejected
O95630	STAM-binding protein [OS=Homo sapiens]	1.01921	1.21971	0.0676757	0.135351	0.338378	Rejected	Rejected	Rejected
P52597	Heterogeneous nuclear ribonucleoprotein F [OS=Homo sapiens]	1.06303	1.70922	0.0677297	0.135459	0.338649	Rejected	Rejected	Rejected
P23246-1	splicing factor, proline- and glutamine-rich [OS=Homo sapiens]	1.06636	1.88878	0.0677838	0.135568	0.338919	Rejected	Rejected	Rejected
P00558	phosphoglycerate kinase 1 [OS=Homo sapiens]	1.08817	1.89926	0.0678378	0.135676	0.339189	Rejected	Rejected	Rejected
P82979	SAP domain-containing ribonucleoprotein [OS=Homo sapiens]	1.3979	1.77838	0.0678919	0.135784	0.339459	Rejected	Rejected	Rejected
P46108-1	Adapter molecule crk [OS=Homo sapiens]	1.08363	1.96402	0.0679459	0.135892	0.33973	Rejected	Rejected	Rejected
Q04760-1	lactoylglutathione lyase [OS=Homo sapiens]	1.0295	1.31383	0.068	0.136	0.34	Rejected	Rejected	Rejected
Q12765-2	Isoform 2 of Secernin-1 [OS=Homo sapiens]	1.06857	1.86906	0.0680541	0.136108	0.34027	Rejected	Rejected	Rejected
P13693	Translationally-controlled tumor protein [OS=Homo sapiens]	1.01672	1.2095	0.0681081	0.136216	0.340541	Rejected	Rejected	Rejected
Q9NYH9	U3 small nucleolar RNA-associated protein 6 homolog [OS=Homo sapiens]	1.10271	1.47163	0.0681622	0.136324	0.340811	Rejected	Rejected	Rejected
Q9BY43-2	Isoform 2 of Charged multivesicular body protein 4a [OS=Homo sapiens]	1.02234	1.25569	0.0682162	0.136432	0.341081	Rejected	Rejected	Rejected
Q9BRA2	Thioredoxin domain-containing protein 17 [OS=Homo sapiens]	1.0524	1.3852	0.0682703	0.136541	0.341351	Rejected	Rejected	Rejected
O95347-1	structural maintenance of chromosomes protein 2 [OS=Homo sapiens]	2.64439	3.11115	0.0683243	0.136649	0.341622	Rejected	Rejected	Rejected
Q9NQG5	regulation of nuclear pre-mRNA domain-containing protein 1B [OS=Homo sapiens]	1.0183	1.20388	0.0683784	0.136757	0.341892	Rejected	Rejected	Rejected
Q86UP2-1	Kinectin [OS=Homo sapiens]	1.08717	2.34375	0.0684324	0.136865	0.342162	Rejected	Rejected	Rejected
O43865	adenosylhomocysteinase 2 [OS=Homo sapiens]	1.50061	2.54707	0.0684865	0.136973	0.342432	Rejected	Rejected	Rejected
O94906-1	Pre-mRNA-processing factor 6 [OS=Homo sapiens]	1.50873	3.39525	0.0685405	0.137081	0.342703	Rejected	Rejected	Rejected
P61619	Protein transport protein Sec61 subunit alpha isoform 1 [OS=Homo sapiens]	1.24398	1.56471	0.0685946	0.137189	0.342973	Rejected	Rejected	Rejected
Q99567	Nuclear pore complex protein Nup88 [OS=Homo sapiens]	1.2367	1.68089	0.0686486	0.137297	0.343243	Rejected	Rejected	Rejected
P26373-1	60S ribosomal protein L13 [OS=Homo sapiens]	1.03749	1.32023	0.0687027	0.137405	0.343514	Rejected	Rejected	Rejected
Q14498-1	RNA-binding protein 39 [OS=Homo sapiens]	2.41507	4.97494	0.0687568	0.137514	0.343784	Rejected	Rejected	Rejected
Q9UHQ4-2	Isoform 2 of B-cell receptor-associated protein 29 [OS=Homo sapiens]	1.02069	1.22786	0.0688108	0.137622	0.344054	Rejected	Rejected	Rejected
Q99536	Synaptic vesicle membrane protein VAT-1 homolog [OS=Homo sapiens]	1.08285	2.10937	0.0688649	0.13773	0.344324	Rejected	Rejected	Rejected
O14828	Secretory carrier-associated membrane protein 3 [OS=Homo sapiens]	1.02463	1.26223	0.0689189	0.137838	0.344595	Rejected	Rejected	Rejected
P11310-2	Isoform 2 of Medium-chain specific acyl-CoA dehydrogenase, mitochondrial [OS=Homo sapiens]	1.03037	1.33877	0.068973	0.137946	0.344865	Rejected	Rejected	Rejected
P26599-3	Isoform 3 of Polypyrimidine tract-binding protein 1 [OS=Homo sapiens]	1.30635	2.66782	0.069027	0.138054	0.345135	Rejected	Rejected	Rejected
O75781	Paralemmin-1 [OS=Homo sapiens]	1.03519	1.33192	0.0690811	0.138162	0.345405	Rejected	Rejected	Rejected
Q8WUF5	RelA-associated inhibitor [OS=Homo sapiens]	2.02014	2.45112	0.0691351	0.13827	0.345676	Rejected	Rejected	Rejected
Q9C0C9	(E3-independent) E2 ubiquitin-conjugating enzyme [OS=Homo sapiens]	1.01962	1.30584	0.0691892	0.138378	0.345946	Rejected	Rejected	Rejected
P61086	Ubiquitin-conjugating enzyme E2 K [OS=Homo sapiens]	1.44736	1.93775	0.0692432	0.138486	0.346216	Rejected	Rejected	Rejected
Q8TCS8	Polyribonucleotide nucleotidyltransferase 1, mitochondrial [OS=Homo sapiens]	1.33029	1.89502	0.0692973	0.138595	0.346486	Rejected	Rejected	Rejected
P68036-3	Isoform 3 of Ubiquitin-conjugating enzyme E2 L3 [OS=Homo sapiens]	3.71122	4.40852	0.0693514	0.138703	0.346757	Rejected	Rejected	Rejected
P19022	Cadherin-2 [OS=Homo sapiens]	1.02326	1.24765	0.0694054	0.138811	0.347027	Rejected	Rejected	Rejected
O14579-1	coatomer subunit epsilon [OS=Homo sapiens]	1.02904	1.26931	0.0694595	0.138919	0.347297	Rejected	Rejected	Rejected
Q9BQA1	Methylosome protein 50 [OS=Homo sapiens]	1.01655	1.18678	0.0695135	0.139027	0.347568	Rejected	Rejected	Rejected
Q9H0A0	RNA cytidine acetyltransferase [OS=Homo sapiens]	1.04505	1.61097	0.0695676	0.139135	0.347838	Rejected	Rejected	Rejected
Q13243-1	Serine/arginine-rich splicing factor 5 [OS=Homo sapiens]	1.11072	1.49473	0.0696216	0.139243	0.348108	Rejected	Rejected	Rejected
Q9ULC4-3	Isoform 3 of Malignant T-cell-amplified sequence 1 [OS=Homo sapiens]	1.01374	1.22555	0.0696757	0.139351	0.348378	Rejected	Rejected	Rejected
Q96PU8	protein quaking [OS=Homo sapiens]	1.02749	1.44279	0.0697297	0.139459	0.348649	Rejected	Rejected	Rejected
O15270	Serine palmitoyltransferase 2 [OS=Homo sapiens]	1.02061	1.23338	0.0697838	0.139568	0.348919	Rejected	Rejected	Rejected
Q14691	DNA replication complex GINS protein PSF1 [OS=Homo sapiens]	1.01218	1.26022	0.0698378	0.139676	0.349189	Rejected	Rejected	Rejected
P43307	Translocon-associated protein subunit alpha [OS=Homo sapiens]	1.14545	2.08285	0.0698919	0.139784	0.349459	Rejected	Rejected	Rejected
P50213-1	Isocitrate dehydrogenase [NAD] subunit alpha, mitochondrial [OS=Homo sapiens]	1.02937	1.42252	0.0699459	0.139892	0.34973	Rejected	Rejected	Rejected
Q5T4S7-2	Isoform 2 of E3 ubiquitin-protein ligase UBR4 [OS=Homo sapiens]	1.0172	1.28492	0.07	0.14	0.35	Rejected	Rejected	Rejected
P36551	Oxygen-dependent coproporphyrinogen-III oxidase, mitochondrial [OS=Homo sapiens]	1.07652	4.08299	0.0700541	0.140108	0.35027	Rejected	Rejected	Rejected
Q15363	Transmembrane emp24 domain-containing protein 2 [OS=Homo sapiens]	1.0195	1.26822	0.0701081	0.140216	0.350541	Rejected	Rejected	Rejected
Q9UMX0-1	Ubiquilin-1 [OS=Homo sapiens]	2.27437	3.12199	0.0701622	0.140324	0.350811	Rejected	Rejected	Rejected
Q92688	Acidic leucine-rich nuclear phosphoprotein 32 family member B [OS=Homo sapiens]	3.26876	5.03323	0.0702162	0.140432	0.351081	Rejected	Rejected	Rejected
Q9H4A4	aminopeptidase B [OS=Homo sapiens]	1.03854	1.3869	0.0702703	0.140541	0.351351	Rejected	Rejected	Rejected
P46779-3	Isoform 3 of 60S ribosomal protein L28 [OS=Homo sapiens]	1.21117	1.82032	0.0703243	0.140649	0.351622	Rejected	Rejected	Rejected
Q03154-1	Aminoacylase-1 [OS=Homo sapiens]	1.02388	1.22312	0.0703784	0.140757	0.351892	Rejected	Rejected	Rejected
Q92667	A-kinase anchor protein 1, mitochondrial [OS=Homo sapiens]	1.04941	1.88627	0.0704324	0.140865	0.352162	Rejected	Rejected	Rejected
P35221-2	Isoform 2 of Catenin alpha-1 [OS=Homo sapiens]	1.03799	1.73379	0.0704865	0.140973	0.352432	Rejected	Rejected	Rejected
Q9NY33	dipeptidyl peptidase 3 [OS=Homo sapiens]	2.42463	3.93243	0.0705405	0.141081	0.352703	Rejected	Rejected	Rejected
Q9UBT2	SUMO-activating enzyme subunit 2 [OS=Homo sapiens]	1.0206	1.2991	0.0705946	0.141189	0.352973	Rejected	Rejected	Rejected
P50990	T-complex protein 1 subunit theta [OS=Homo sapiens]	1.0669	1.69809	0.0706486	0.141297	0.353243	Rejected	Rejected	Rejected
P50914	60S ribosomal protein L14 [OS=Homo sapiens]	1.05358	2.12468	0.0707027	0.141405	0.353514	Rejected	Rejected	Rejected
P62306	Small nuclear ribonucleoprotein F [OS=Homo sapiens]	1.03204	2.19834	0.0707568	0.141514	0.353784	Rejected	Rejected	Rejected
Q15435	Protein phosphatase 1 regulatory subunit 7 [OS=Homo sapiens]	1.00824	1.18019	0.0708108	0.141622	0.354054	Rejected	Rejected	Rejected
Q5BKZ1	DBIRD complex subunit ZNF326 [OS=Homo sapiens]	1.01454	1.20477	0.0708649	0.14173	0.354324	Rejected	Rejected	Rejected
P10620	Microsomal glutathione S-transferase 1 [OS=Homo sapiens]	1.37109	1.89581	0.0709189	0.141838	0.354595	Rejected	Rejected	Rejected
P82933	28S ribosomal protein S9, mitochondrial [OS=Homo sapiens]	1.00827	1.32312	0.070973	0.141946	0.354865	Rejected	Rejected	Rejected
Q9UJZ1	Stomatin-like protein 2, mitochondrial [OS=Homo sapiens]	1.03724	1.6039	0.071027	0.142054	0.355135	Rejected	Rejected	Rejected
Q14683	structural maintenance of chromosomes protein 1a [OS=Homo sapiens]	1.25681	2.12029	0.0710811	0.142162	0.355405	Rejected	Rejected	Rejected
P83916	Chromobox protein homolog 1 [OS=Homo sapiens]	1.29557	1.7881	0.0711351	0.14227	0.355676	Rejected	Rejected	Rejected
P27105	erythrocyte band 7 integral membrane protein [OS=Homo sapiens]	1.70854	2.24945	0.0711892	0.142378	0.355946	Rejected	Rejected	Rejected
P84090	Enhancer of rudimentary homolog [OS=Homo sapiens]	1.00678	1.15455	0.0712432	0.142486	0.356216	Rejected	Rejected	Rejected
P31942	Heterogeneous nuclear ribonucleoprotein H3 [OS=Homo sapiens]	1.07379	1.70839	0.0712973	0.142595	0.356486	Rejected	Rejected	Rejected
P07099	epoxide hydrolase 1 [OS=Homo sapiens]	1.00613	1.24408	0.0713514	0.142703	0.356757	Rejected	Rejected	Rejected
P48509	CD151 antigen [OS=Homo sapiens]	1.54629	2.21342	0.0714054	0.142811	0.357027	Rejected	Rejected	Rejected
P04181-1	Ornithine aminotransferase, mitochondrial [OS=Homo sapiens]	14.6065	191.166	0.0714595	0.142919	0.357297	Rejected	Rejected	Rejected
P62333	26S protease regulatory subunit 10B [OS=Homo sapiens]	1.41002	3.76354	0.0715135	0.143027	0.357568	Rejected	Rejected	Rejected
P51665	26S proteasome non-ATPase regulatory subunit 7 [OS=Homo sapiens]	1.00831	1.16358	0.0715676	0.143135	0.357838	Rejected	Rejected	Rejected
O15145	Actin-related protein 2/3 complex subunit 3 [OS=Homo sapiens]	1.00306	1.27226	0.0716216	0.143243	0.358108	Rejected	Rejected	Rejected
O43768-4	Isoform 4 of Alpha-endosulfine [OS=Homo sapiens]	1.24833	2.54564	0.0716757	0.143351	0.358378	Rejected	Rejected	Rejected
Q96FW1	Ubiquitin thioesterase otub1 [OS=Homo sapiens]	1.0086	1.24693	0.0717297	0.143459	0.358649	Rejected	Rejected	Rejected
P09132-1	Signal recognition particle 19 kDa protein [OS=Homo sapiens]	1.02778	1.3241	0.0717838	0.143568	0.358919	Rejected	Rejected	Rejected
P08240-1	signal recognition particle receptor subunit alpha [OS=Homo sapiens]	1.11661	1.63776	0.0718378	0.143676	0.359189	Rejected	Rejected	Rejected
P05387	60S acidic ribosomal protein P2 [OS=Homo sapiens]	1.47376	2.53861	0.0718919	0.143784	0.359459	Rejected	Rejected	Rejected
P61916	Epididymal secretory protein E1 [OS=Homo sapiens]	1.00828	1.30253	0.0719459	0.143892	0.35973	Rejected	Rejected	Rejected
Q9NP72-2	Isoform 2 of Ras-related protein Rab-18 [OS=Homo sapiens]	1.00064	1.14796	0.072	0.144	0.36	Rejected	Rejected	Rejected
Q01130	serine/arginine-rich splicing factor 2 [OS=Homo sapiens]	1.19207	1.86834	0.0720541	0.144108	0.36027	Rejected	Rejected	Rejected
Q9H583	HEAT repeat-containing protein 1 [OS=Homo sapiens]	1.00319	1.19284	0.0721081	0.144216	0.360541	Rejected	Rejected	Rejected
Q8TBC4-1	NEDD8-activating enzyme E1 catalytic subunit [OS=Homo sapiens]	1.00902	1.2327	0.0721622	0.144324	0.360811	Rejected	Rejected	Rejected
Q14839-2	Isoform 2 of Chromodomain-helicase-DNA-binding protein 4 [OS=Homo sapiens]	1.0037	1.30639	0.0722162	0.144432	0.361081	Rejected	Rejected	Rejected
Q71RC2-4	Isoform 4 of La-related protein 4 [OS=Homo sapiens]	0.999653	1.17976	0.0722703	0.144541	0.361351	Rejected	Rejected	Rejected
P68366	Tubulin alpha-4A chain [OS=Homo sapiens]	1.00693	1.29841	0.0723243	0.144649	0.361622	Rejected	Rejected	Rejected
Q02750	Dual specificity mitogen-activated protein kinase kinase 1 [OS=Homo sapiens]	1.0107	1.20681	0.0723784	0.144757	0.361892	Rejected	Rejected	Rejected
Q9Y6D9	mitotic spindle assembly checkpoint protein MAD1 [OS=Homo sapiens]	1.00422	1.22758	0.0724324	0.144865	0.362162	Rejected	Rejected	Rejected
P55060-1	Exportin-2 [OS=Homo sapiens]	0.980141	1.91745	0.0724865	0.144973	0.362432	Rejected	Rejected	Rejected
O00303	Eukaryotic translation initiation factor 3 subunit F [OS=Homo sapiens]	1.26753	3.05444	0.0725405	0.145081	0.362703	Rejected	Rejected	Rejected
P52272	Heterogeneous nuclear ribonucleoprotein M [OS=Homo sapiens]	1.20519	2.14102	0.0725946	0.145189	0.362973	Rejected	Rejected	Rejected
Q9Y5S9	RNA-binding protein 8A [OS=Homo sapiens]	1.00493	1.18973	0.0726486	0.145297	0.363243	Rejected	Rejected	Rejected
O75340	programmed cell death protein 6 [OS=Homo sapiens]	1.00101	1.18689	0.0727027	0.145405	0.363514	Rejected	Rejected	Rejected
P51398-1	28S ribosomal protein S29, mitochondrial [OS=Homo sapiens]	1.00467	1.31712	0.0727568	0.145514	0.363784	Rejected	Rejected	Rejected
P17858-1	ATP-dependent 6-phosphofructokinase, liver type [OS=Homo sapiens]	1.00106	1.22893	0.0728108	0.145622	0.364054	Rejected	Rejected	Rejected
P22695	Cytochrome b-c1 complex subunit 2, mitochondrial [OS=Homo sapiens]	1.01424	1.88783	0.0728649	0.14573	0.364324	Rejected	Rejected	Rejected
P51572-2	Isoform 2 of B-cell receptor-associated protein 31 [OS=Homo sapiens]	1.10567	2.75296	0.0729189	0.145838	0.364595	Rejected	Rejected	Rejected
Q9ULA0	Aspartyl aminopeptidase [OS=Homo sapiens]	1.01195	1.34611	0.072973	0.145946	0.364865	Rejected	Rejected	Rejected
P02786	Transferrin receptor protein 1 [OS=Homo sapiens]	0.98601	1.73076	0.073027	0.146054	0.365135	Rejected	Rejected	Rejected
Q7Z4S6-4	Isoform 4 of Kinesin-like protein KIF21A [OS=Homo sapiens]	0.972009	3.16436	0.0730811	0.146162	0.365405	Rejected	Rejected	Rejected
P17655-1	Calpain-2 catalytic subunit [OS=Homo sapiens]	1.03504	1.80262	0.0731351	0.14627	0.365676	Rejected	Rejected	Rejected
Q53H12	Acylglycerol kinase, mitochondrial [OS=Homo sapiens]	1.00712	1.22362	0.0731892	0.146378	0.365946	Rejected	Rejected	Rejected
P00390	Glutathione reductase, mitochondrial [OS=Homo sapiens]	0.986246	1.60269	0.0732432	0.146486	0.366216	Rejected	Rejected	Rejected
O43795	Unconventional myosin-Ib [OS=Homo sapiens]	1.00527	1.31611	0.0732973	0.146595	0.366486	Rejected	Rejected	Rejected
O75131	Copine-3 [OS=Homo sapiens]	1.02761	1.72064	0.0733514	0.146703	0.366757	Rejected	Rejected	Rejected
P46013	Antigen KI-67 [OS=Homo sapiens]	1.00862	1.71425	0.0734054	0.146811	0.367027	Rejected	Rejected	Rejected
O75306-1	NADH dehydrogenase [ubiquinone] iron-sulfur protein 2, mitochondrial [OS=Homo sapiens]	0.99702	1.22868	0.0734595	0.146919	0.367297	Rejected	Rejected	Rejected
Q15024	Exosome complex component RRP42 [OS=Homo sapiens]	1.00227	1.26927	0.0735135	0.147027	0.367568	Rejected	Rejected	Rejected
Q07065	Cytoskeleton-associated protein 4 [OS=Homo sapiens]	1.51044	3.08292	0.0735676	0.147135	0.367838	Rejected	Rejected	Rejected
O60749	Sorting nexin-2 [OS=Homo sapiens]	1.00705	1.7893	0.0736216	0.147243	0.368108	Rejected	Rejected	Rejected
Q9BWF3-1	RNA-binding protein 4 [OS=Homo sapiens]	0.99832	1.31635	0.0736757	0.147351	0.368378	Rejected	Rejected	Rejected
O94826	Mitochondrial import receptor subunit TOM70 [OS=Homo sapiens]	1.01385	1.49617	0.0737297	0.147459	0.368649	Rejected	Rejected	Rejected
O15067	Phosphoribosylformylglycinamidine synthase [OS=Homo sapiens]	1.03767	2.69007	0.0737838	0.147568	0.368919	Rejected	Rejected	Rejected
O96000	NADH dehydrogenase [ubiquinone] 1 beta subcomplex subunit 10 [OS=Homo sapiens]	0.995109	1.28203	0.0738378	0.147676	0.369189	Rejected	Rejected	Rejected
Q9UH65	Switch-associated protein 70 [OS=Homo sapiens]	1.02581	2.29674	0.0738919	0.147784	0.369459	Rejected	Rejected	Rejected
Q14011-2	Isoform 2 of Cold-inducible RNA-binding protein [OS=Homo sapiens]	1.00987	1.39827	0.0739459	0.147892	0.36973	Rejected	Rejected	Rejected
Q9Y277-2	Isoform 2 of Voltage-dependent anion-selective channel protein 3 [OS=Homo sapiens]	0.992236	1.32302	0.074	0.148	0.37	Rejected	Rejected	Rejected
O00299	chloride intracellular channel protein 1 [OS=Homo sapiens]	1.00718	1.29903	0.0740541	0.148108	0.37027	Rejected	Rejected	Rejected
Q13242	serine/arginine-rich splicing factor 9 [OS=Homo sapiens]	0.996439	1.54792	0.0741081	0.148216	0.370541	Rejected	Rejected	Rejected
Q9NUQ6-3	Isoform 3 of SPATS2-like protein [OS=Homo sapiens]	1.00079	1.2553	0.0741622	0.148324	0.370811	Rejected	Rejected	Rejected
P62851	40S ribosomal protein S25 [OS=Homo sapiens]	1.00488	1.19466	0.0742162	0.148432	0.371081	Rejected	Rejected	Rejected
Q9NZB2-6	Isoform F of Constitutive coactivator of PPAR-gamma-like protein 1 [OS=Homo sapiens]	0.998937	1.27882	0.0742703	0.148541	0.371351	Rejected	Rejected	Rejected
Q14232	Translation initiation factor eIF-2B subunit alpha [OS=Homo sapiens]	1.00284	1.26429	0.0743243	0.148649	0.371622	Rejected	Rejected	Rejected
P40763	Signal transducer and activator of transcription 3 [OS=Homo sapiens]	1.07197	1.81418	0.0743784	0.148757	0.371892	Rejected	Rejected	Rejected
Q10713	Mitochondrial-processing peptidase subunit alpha [OS=Homo sapiens]	1.01327	1.28614	0.0744324	0.148865	0.372162	Rejected	Rejected	Rejected
Q9UL25	Ras-related protein Rab-21 [OS=Homo sapiens]	0.991646	1.21562	0.0744865	0.148973	0.372432	Rejected	Rejected	Rejected
P55010	Eukaryotic translation initiation factor 5 [OS=Homo sapiens]	1.75563	3.90567	0.0745405	0.149081	0.372703	Rejected	Rejected	Rejected
Q9H074	Polyadenylate-binding protein-interacting protein 1 [OS=Homo sapiens]	1.59683	2.38628	0.0745946	0.149189	0.372973	Rejected	Rejected	Rejected
P48507	Glutamate--cysteine ligase regulatory subunit [OS=Homo sapiens]	0.998636	1.23166	0.0746486	0.149297	0.373243	Rejected	Rejected	Rejected
P14866	Heterogeneous nuclear ribonucleoprotein L [OS=Homo sapiens]	1.05821	2.7962	0.0747027	0.149405	0.373514	Rejected	Rejected	Rejected
Q9UBN7-1	histone deacetylase 6 [OS=Homo sapiens]	0.990811	1.25584	0.0747568	0.149514	0.373784	Rejected	Rejected	Rejected
Q9BPW8	Protein NipSnap homolog 1 [OS=Homo sapiens]	1.00063	1.36792	0.0748108	0.149622	0.374054	Rejected	Rejected	Rejected
Q8WXI9	Transcriptional repressor p66-beta [OS=Homo sapiens]	0.992082	1.1917	0.0748649	0.14973	0.374324	Rejected	Rejected	Rejected
P61201-2	Isoform 2 of COP9 signalosome complex subunit 2 [OS=Homo sapiens]	1.00154	1.25114	0.0749189	0.149838	0.374595	Rejected	Rejected	Rejected
O95747	Serine/threonine-protein kinase OSR1 [OS=Homo sapiens]	1.00017	1.25106	0.074973	0.149946	0.374865	Rejected	Rejected	Rejected
Q13601	KRR1 small subunit processome component homolog [OS=Homo sapiens]	0.999643	1.14843	0.075027	0.150054	0.375135	Rejected	Rejected	Rejected
Q16576-1	Histone-binding protein RBBP7 [OS=Homo sapiens]	0.992484	1.21901	0.0750811	0.150162	0.375405	Rejected	Rejected	Rejected
P62191	26S protease regulatory subunit 4 [OS=Homo sapiens]	0.981841	1.33964	0.0751351	0.15027	0.375676	Rejected	Rejected	Rejected
P16989-1	Y-box-binding protein 3 [OS=Homo sapiens]	1.22777	2.05408	0.0751892	0.150378	0.375946	Rejected	Rejected	Rejected
Q9UBQ5	Eukaryotic translation initiation factor 3 subunit K [OS=Homo sapiens]	0.999198	1.22422	0.0752432	0.150486	0.376216	Rejected	Rejected	Rejected
P05114	Non-histone chromosomal protein HMG-14 [OS=Homo sapiens]	0.99724	1.18417	0.0752973	0.150595	0.376486	Rejected	Rejected	Rejected
P61006	Ras-related protein Rab-8A [OS=Homo sapiens]	0.979309	1.29618	0.0753514	0.150703	0.376757	Rejected	Rejected	Rejected
Q9NYB0	Telomeric repeat-binding factor 2-interacting protein 1 [OS=Homo sapiens]	0.68898	1.74084	0.0754054	0.150811	0.377027	Rejected	Rejected	Rejected
P61289-2	Isoform 2 of Proteasome activator complex subunit 3 [OS=Homo sapiens]	0.978839	2.28719	0.0754595	0.150919	0.377297	Rejected	Rejected	Rejected
Q9BWU0	kanadaptin [OS=Homo sapiens]	0.972611	2.60689	0.0755135	0.151027	0.377568	Rejected	Rejected	Rejected
Q9UHD9	Ubiquilin-2 [OS=Homo sapiens]	0.910967	1.65346	0.0755676	0.151135	0.377838	Rejected	Rejected	Rejected
P13073	Cytochrome c oxidase subunit 4 isoform 1, mitochondrial [OS=Homo sapiens]	0.993884	1.28287	0.0756216	0.151243	0.378108	Rejected	Rejected	Rejected
O43852-3	Isoform 3 of Calumenin [OS=Homo sapiens]	0.98965	1.23405	0.0756757	0.151351	0.378378	Rejected	Rejected	Rejected
Q9HCC0-1	Methylcrotonoyl-CoA carboxylase beta chain, mitochondrial [OS=Homo sapiens]	0.98163	1.29337	0.0757297	0.151459	0.378649	Rejected	Rejected	Rejected
Q5JPE7	NODAL modulator 2 [OS=Homo sapiens]	0.988978	1.37389	0.0757838	0.151568	0.378919	Rejected	Rejected	Rejected
Q9C0B1-1	alpha-ketoglutarate-dependent dioxygenase FTO [OS=Homo sapiens]	0.991736	1.26444	0.0758378	0.151676	0.379189	Rejected	Rejected	Rejected
Q5JWF2-1	Guanine nucleotide-binding protein G(S) subunit alpha isoforms XLas [OS=Homo sapiens]	0.984256	1.2998	0.0758919	0.151784	0.379459	Rejected	Rejected	Rejected
O95782	AP-2 complex subunit alpha-1 [OS=Homo sapiens]	1.40902	2.01534	0.0759459	0.151892	0.37973	Rejected	Rejected	Rejected
P05556-1	Integrin beta-1 [OS=Homo sapiens]	1.02749	3.67227	0.076	0.152	0.38	Rejected	Rejected	Rejected
Q9NQW7-3	Isoform 3 of Xaa-Pro aminopeptidase 1 [OS=Homo sapiens]	0.990291	2.34123	0.0760541	0.152108	0.38027	Rejected	Rejected	Rejected
Q15427	Splicing factor 3b subunit 4 [OS=Homo sapiens]	0.986871	1.3157	0.0761081	0.152216	0.380541	Rejected	Rejected	Rejected
Q9BTZ2	dehydrogenase/reductase sdr family member 4 [OS=Homo sapiens]	0.991161	1.20393	0.0761622	0.152324	0.380811	Rejected	Rejected	Rejected
Q12905	Interleukin enhancer-binding factor 2 [OS=Homo sapiens]	0.993373	1.46158	0.0762162	0.152432	0.381081	Rejected	Rejected	Rejected
P56134	ATP synthase subunit f, mitochondrial [OS=Homo sapiens]	0.986701	1.27447	0.0762703	0.152541	0.381351	Rejected	Rejected	Rejected
Q8N3D4	EH domain-binding protein 1-like protein 1 [OS=Homo sapiens]	0.995496	1.26503	0.0763243	0.152649	0.381622	Rejected	Rejected	Rejected
Q8N6H7	ADP-ribosylation factor GTPase-activating protein 2 [OS=Homo sapiens]	0.988783	1.24557	0.0763784	0.152757	0.381892	Rejected	Rejected	Rejected
Q07020	60S ribosomal protein L18 [OS=Homo sapiens]	0.977859	1.36041	0.0764324	0.152865	0.382162	Rejected	Rejected	Rejected
O95831-1	Apoptosis-inducing factor 1, mitochondrial [OS=Homo sapiens]	0.971792	1.25656	0.0764865	0.152973	0.382432	Rejected	Rejected	Rejected
O96005-1	Cleft lip and palate transmembrane protein 1 [OS=Homo sapiens]	0.987942	1.21702	0.0765405	0.153081	0.382703	Rejected	Rejected	Rejected
O15144	Actin-related protein 2/3 complex subunit 2 [OS=Homo sapiens]	0.994582	1.29685	0.0765946	0.153189	0.382973	Rejected	Rejected	Rejected
P00367	Glutamate dehydrogenase 1, mitochondrial [OS=Homo sapiens]	0.993385	1.271	0.0766486	0.153297	0.383243	Rejected	Rejected	Rejected
Q9Y4W2	Ribosomal biogenesis protein LAS1L [OS=Homo sapiens]	0.966107	1.51784	0.0767027	0.153405	0.383514	Rejected	Rejected	Rejected
P25205-2	Isoform 2 of DNA replication licensing factor MCM3 [OS=Homo sapiens]	0.976644	1.90904	0.0767568	0.153514	0.383784	Rejected	Rejected	Rejected
Q96AC1-3	Isoform 3 of Fermitin family homolog 2 [OS=Homo sapiens]	0.984976	1.23111	0.0768108	0.153622	0.384054	Rejected	Rejected	Rejected
P55081	microfibrillar-associated protein 1 [OS=Homo sapiens]	0.986017	1.26471	0.0768649	0.15373	0.384324	Rejected	Rejected	Rejected
O95571	Persulfide dioxygenase ETHE1, mitochondrial [OS=Homo sapiens]	0.980943	1.30009	0.0769189	0.153838	0.384595	Rejected	Rejected	Rejected
O00267	Transcription elongation factor Spt5 [OS=Homo sapiens]	0.98452	1.2756	0.076973	0.153946	0.384865	Rejected	Rejected	Rejected
O60493-1	sorting nexin-3 [OS=Homo sapiens]	0.975563	1.27466	0.077027	0.154054	0.385135	Rejected	Rejected	Rejected
Q92621	Nuclear pore complex protein Nup205 [OS=Homo sapiens]	0.98636	1.28462	0.0770811	0.154162	0.385405	Rejected	Rejected	Rejected
Q9H0B6	Kinesin light chain 2 [OS=Homo sapiens]	0.989381	1.21359	0.0771351	0.15427	0.385676	Rejected	Rejected	Rejected
P30154-2	Isoform 2 of Serine/threonine-protein phosphatase 2A 65 kDa regulatory subunit A beta isoform [OS=Homo sapiens]	0.990111	1.22019	0.0771892	0.154378	0.385946	Rejected	Rejected	Rejected
Q6P1L8	39S ribosomal protein L14, mitochondrial [OS=Homo sapiens]	0.984033	1.27852	0.0772432	0.154486	0.386216	Rejected	Rejected	Rejected
P46781	40S ribosomal protein S9 [OS=Homo sapiens]	0.965542	1.35709	0.0772973	0.154595	0.386486	Rejected	Rejected	Rejected
Q6F5E8	capping protein, Arp2/3 and myosin-I linker protein 2 [OS=Homo sapiens]	0.951348	1.61577	0.0773514	0.154703	0.386757	Rejected	Rejected	Rejected
P61026	ras-related protein rab-10 [OS=Homo sapiens]	0.978118	1.24073	0.0774054	0.154811	0.387027	Rejected	Rejected	Rejected
Q9Y3C6	Peptidyl-prolyl cis-trans isomerase-like 1 [OS=Homo sapiens]	0.986829	1.25759	0.0774595	0.154919	0.387297	Rejected	Rejected	Rejected
Q969G3	SWI/SNF-related matrix-associated actin-dependent regulator of chromatin subfamily E member 1 [OS=Homo sapiens]	0.97056	1.66611	0.0775135	0.155027	0.387568	Rejected	Rejected	Rejected
P28331-2	Isoform 2 of NADH-ubiquinone oxidoreductase 75 kDa subunit, mitochondrial [OS=Homo sapiens]	0.996858	1.18253	0.0775676	0.155135	0.387838	Rejected	Rejected	Rejected
Q9UNY4-1	transcription termination factor 2 [OS=Homo sapiens]	0.936804	1.65638	0.0776216	0.155243	0.388108	Rejected	Rejected	Rejected
P53597	Succinyl-CoA ligase [ADP/GDP-forming] subunit alpha, mitochondrial [OS=Homo sapiens]	0.99529	1.17454	0.0776757	0.155351	0.388378	Rejected	Rejected	Rejected
P20810-5	Isoform 5 of Calpastatin [OS=Homo sapiens]	0.977659	1.26859	0.0777297	0.155459	0.388649	Rejected	Rejected	Rejected
Q01970-1	1-phosphatidylinositol 4,5-bisphosphate phosphodiesterase beta-3 [OS=Homo sapiens]	0.98061	1.19274	0.0777838	0.155568	0.388919	Rejected	Rejected	Rejected
Q9H9H4	Vacuolar protein sorting-associated protein 37B [OS=Homo sapiens]	0.970048	1.26869	0.0778378	0.155676	0.389189	Rejected	Rejected	Rejected
O43809	Cleavage and polyadenylation specificity factor subunit 5 [OS=Homo sapiens]	0.988641	1.18367	0.0778919	0.155784	0.389459	Rejected	Rejected	Rejected
Q9Y448	Small kinetochore-associated protein [OS=Homo sapiens]	0.878853	1.95764	0.0779459	0.155892	0.38973	Rejected	Rejected	Rejected
Q8IX01-1	SURP and G-patch domain-containing protein 2 [OS=Homo sapiens]	0.969058	1.86816	0.078	0.156	0.39	Rejected	Rejected	Rejected
Q96P70	Importin-9 [OS=Homo sapiens]	0.971874	1.23198	0.0780541	0.156108	0.39027	Rejected	Rejected	Rejected
Q15648	Mediator of RNA polymerase II transcription subunit 1 [OS=Homo sapiens]	0.924812	1.92111	0.0781081	0.156216	0.390541	Rejected	Rejected	Rejected
Q86V48-1	Leucine zipper protein 1 [OS=Homo sapiens]	0.964919	1.45193	0.0781622	0.156324	0.390811	Rejected	Rejected	Rejected
Q9Y3B9	RRP15-like protein [OS=Homo sapiens]	0.983573	1.30893	0.0782162	0.156432	0.391081	Rejected	Rejected	Rejected
Q9GZT3-1	SRA stem-loop-interacting RNA-binding protein, mitochondrial [OS=Homo sapiens]	0.98575	1.33659	0.0782703	0.156541	0.391351	Rejected	Rejected	Rejected
Q14739	Lamin-B receptor [OS=Homo sapiens]	0.906485	1.94146	0.0783243	0.156649	0.391622	Rejected	Rejected	Rejected
P15927-3	Isoform 3 of Replication protein A 32 kDa subunit [OS=Homo sapiens]	0.922596	2.1406	0.0783784	0.156757	0.391892	Rejected	Rejected	Rejected
O60573	eukaryotic translation initiation factor 4E type 2 [OS=Homo sapiens]	0.95867	1.47024	0.0784324	0.156865	0.392162	Rejected	Rejected	Rejected
P13591-2	Neural cell adhesion molecule 1 [OS=Homo sapiens]	0.963313	1.24306	0.0784865	0.156973	0.392432	Rejected	Rejected	Rejected
Q9UNX4	WD repeat-containing protein 3 [OS=Homo sapiens]	0.982663	1.26732	0.0785405	0.157081	0.392703	Rejected	Rejected	Rejected
P19623	spermidine synthase [OS=Homo sapiens]	0.980073	1.20873	0.0785946	0.157189	0.392973	Rejected	Rejected	Rejected
P51532-1	Transcription activator BRG1 [OS=Homo sapiens]	0.39465	6.84732	0.0786486	0.157297	0.393243	Rejected	Rejected	Rejected
P46459	Vesicle-fusing ATPase [OS=Homo sapiens]	0.912202	1.90903	0.0787027	0.157405	0.393514	Rejected	Rejected	Rejected
Q8WUM4-2	Isoform 2 of Programmed cell death 6-interacting protein [OS=Homo sapiens]	0.91025	2.04262	0.0787568	0.157514	0.393784	Rejected	Rejected	Rejected
O75832	26S proteasome non-ATPase regulatory subunit 10 [OS=Homo sapiens]	0.953254	1.37771	0.0788108	0.157622	0.394054	Rejected	Rejected	Rejected
Q9Y285	Phenylalanine--tRNA ligase alpha subunit [OS=Homo sapiens]	0.961736	1.25934	0.0788649	0.15773	0.394324	Rejected	Rejected	Rejected
P84103	Serine/arginine-rich splicing factor 3 [OS=Homo sapiens]	0.977828	1.22148	0.0789189	0.157838	0.394595	Rejected	Rejected	Rejected
P55196-5	Isoform 5 of Afadin [OS=Homo sapiens]	0.928813	1.785	0.078973	0.157946	0.394865	Rejected	Rejected	Rejected
Q8TD16-2	Isoform 2 of Protein bicaudal D homolog 2 [OS=Homo sapiens]	0.969538	1.28182	0.079027	0.158054	0.395135	Rejected	Rejected	Rejected
P52926-1	high mobility group protein HMGI-C [OS=Homo sapiens]	0.970209	1.21266	0.0790811	0.158162	0.395405	Rejected	Rejected	Rejected
P22570-7	Isoform 7 of NADPH:adrenodoxin oxidoreductase, mitochondrial [OS=Homo sapiens]	0.908918	2.87538	0.0791351	0.15827	0.395676	Rejected	Rejected	Rejected
Q9UKS6	Protein kinase C and casein kinase substrate in neurons protein 3 [OS=Homo sapiens]	0.779874	2.83461	0.0791892	0.158378	0.395946	Rejected	Rejected	Rejected
P49593	Protein phosphatase 1F [OS=Homo sapiens]	0.969501	1.25269	0.0792432	0.158486	0.396216	Rejected	Rejected	Rejected
P61081	NEDD8-conjugating enzyme Ubc12 [OS=Homo sapiens]	0.824348	1.70434	0.0792973	0.158595	0.396486	Rejected	Rejected	Rejected
P52732	Kinesin-like protein KIF11 [OS=Homo sapiens]	0.665092	5.03994	0.0793514	0.158703	0.396757	Rejected	Rejected	Rejected
O43264	Centromere/kinetochore protein zw10 homolog [OS=Homo sapiens]	0.972174	1.20554	0.0794054	0.158811	0.397027	Rejected	Rejected	Rejected
Q08379	Golgin subfamily A member 2 [OS=Homo sapiens]	0.96781	1.22641	0.0794595	0.158919	0.397297	Rejected	Rejected	Rejected
P31947-1	14-3-3 protein sigma [OS=Homo sapiens]	0.902365	2.0571	0.0795135	0.159027	0.397568	Rejected	Rejected	Rejected
O75964	ATP synthase subunit g, mitochondrial [OS=Homo sapiens]	0.972763	1.25846	0.0795676	0.159135	0.397838	Rejected	Rejected	Rejected
Q9H832	Ubiquitin-conjugating enzyme E2 Z [OS=Homo sapiens]	0.966289	1.23537	0.0796216	0.159243	0.398108	Rejected	Rejected	Rejected
P35659-1	Protein DEK [OS=Homo sapiens]	0.964455	1.1851	0.0796757	0.159351	0.398378	Rejected	Rejected	Rejected
P61077-3	Isoform 3 of Ubiquitin-conjugating enzyme E2 D3 [OS=Homo sapiens]	0.954705	1.30812	0.0797297	0.159459	0.398649	Rejected	Rejected	Rejected
Q3ZCQ8-2	Isoform 2 of Mitochondrial import inner membrane translocase subunit TIM50 [OS=Homo sapiens]	0.925144	1.98353	0.0797838	0.159568	0.398919	Rejected	Rejected	Rejected
Q9Y2A7-2	Isoform 2 of Nck-associated protein 1 [OS=Homo sapiens]	0.960851	1.22349	0.0798378	0.159676	0.399189	Rejected	Rejected	Rejected
P05091	Aldehyde dehydrogenase, mitochondrial [OS=Homo sapiens]	0.787613	2.21494	0.0798919	0.159784	0.399459	Rejected	Rejected	Rejected
P30566	adenylosuccinate lyase [OS=Homo sapiens]	0.954629	1.29804	0.0799459	0.159892	0.39973	Rejected	Rejected	Rejected
P49257	Protein ERGIC-53 [OS=Homo sapiens]	0.966727	1.23566	0.08	0.16	0.4	Rejected	Rejected	Rejected
Q9BXS6	Nucleolar and spindle-associated protein 1 [OS=Homo sapiens]	0.923653	1.74562	0.0800541	0.160108	0.40027	Rejected	Rejected	Rejected
Q92930	Ras-related protein Rab-8B [OS=Homo sapiens]	0.913916	1.5428	0.0801081	0.160216	0.400541	Rejected	Rejected	Rejected
P53007	Tricarboxylate transport protein, mitochondrial [OS=Homo sapiens]	0.96684	1.27649	0.0801622	0.160324	0.400811	Rejected	Rejected	Rejected
P23229-1	integrin alpha-6 [OS=Homo sapiens]	0.975601	1.1851	0.0802162	0.160432	0.401081	Rejected	Rejected	Rejected
O95864	fatty acid desaturase 2 [OS=Homo sapiens]	0.9525	1.27659	0.0802703	0.160541	0.401351	Rejected	Rejected	Rejected
Q9BZZ5-4	Apoptosis inhibitor 5 [OS=Homo sapiens]	0.957981	1.28326	0.0803243	0.160649	0.401622	Rejected	Rejected	Rejected
Q8IWS0-1	PHD finger protein 6 [OS=Homo sapiens]	0.960197	1.24334	0.0803784	0.160757	0.401892	Rejected	Rejected	Rejected
Q9H773	dCTP pyrophosphatase 1 [OS=Homo sapiens]	0.964063	1.23142	0.0804324	0.160865	0.402162	Rejected	Rejected	Rejected
O60701	UDP-glucose 6-dehydrogenase [OS=Homo sapiens]	0.823503	2.25576	0.0804865	0.160973	0.402432	Rejected	Rejected	Rejected
Q00653-1	Nuclear factor NF-kappa-B p100 subunit [OS=Homo sapiens]	0.973637	1.20509	0.0805405	0.161081	0.402703	Rejected	Rejected	Rejected
Q9UBS4	DnaJ homolog subfamily B member 11 [OS=Homo sapiens]	0.967973	1.18768	0.0805946	0.161189	0.402973	Rejected	Rejected	Rejected
P62495	Eukaryotic peptide chain release factor subunit 1 [OS=Homo sapiens]	0.870198	2.14415	0.0806486	0.161297	0.403243	Rejected	Rejected	Rejected
Q9Y676	28S ribosomal protein S18b, mitochondrial [OS=Homo sapiens]	0.955989	1.27265	0.0807027	0.161405	0.403514	Rejected	Rejected	Rejected
Q13045-1	protein flightless-1 homolog [OS=Homo sapiens]	0.956815	1.27031	0.0807568	0.161514	0.403784	Rejected	Rejected	Rejected
Q92896-2	Isoform 2 of Golgi apparatus protein 1 [OS=Homo sapiens]	0.8334	3.1176	0.0808108	0.161622	0.404054	Rejected	Rejected	Rejected
Q14254	Flotillin-2 [OS=Homo sapiens]	0.925653	1.37556	0.0808649	0.16173	0.404324	Rejected	Rejected	Rejected
Q9BYG3	MKI67 FHA domain-interacting nucleolar phosphoprotein [OS=Homo sapiens]	0.903243	1.73767	0.0809189	0.161838	0.404595	Rejected	Rejected	Rejected
Q92841	Probable ATP-dependent RNA helicase DDX17 [OS=Homo sapiens]	0.827011	3.03245	0.080973	0.161946	0.404865	Rejected	Rejected	Rejected
P52594-4	Isoform 4 of Arf-GAP domain and FG repeat-containing protein 1 [OS=Homo sapiens]	0.772883	2.1036	0.081027	0.162054	0.405135	Rejected	Rejected	Rejected
Q92520	Protein FAM3C [OS=Homo sapiens]	0.957188	1.22717	0.0810811	0.162162	0.405405	Rejected	Rejected	Rejected
P49753-1	Acyl-coenzyme A thioesterase 2, mitochondrial [OS=Homo sapiens]	0.958141	1.24389	0.0811351	0.16227	0.405676	Rejected	Rejected	Rejected
P09543-1	2',3'-cyclic-nucleotide 3'-phosphodiesterase [OS=Homo sapiens]	0.945856	1.31714	0.0811892	0.162378	0.405946	Rejected	Rejected	Rejected
P04818	thymidylate synthase [OS=Homo sapiens]	0.934169	1.40543	0.0812432	0.162486	0.406216	Rejected	Rejected	Rejected
Q8WWM7-3	Isoform 3 of Ataxin-2-like protein [OS=Homo sapiens]	0.858673	2.1	0.0812973	0.162595	0.406486	Rejected	Rejected	Rejected
Q9UI30	Multifunctional methyltransferase subunit TRM112-like protein [OS=Homo sapiens]	0.868539	1.79968	0.0813514	0.162703	0.406757	Rejected	Rejected	Rejected
P49006	MARCKS-related protein [OS=Homo sapiens]	0.961547	1.24359	0.0814054	0.162811	0.407027	Rejected	Rejected	Rejected
P12004	proliferating cell nuclear antigen [OS=Homo sapiens]	0.929431	1.41763	0.0814595	0.162919	0.407297	Rejected	Rejected	Rejected
Q9P0V9-2	Isoform 2 of Septin-10 [OS=Homo sapiens]	0.952105	1.26614	0.0815135	0.163027	0.407568	Rejected	Rejected	Rejected
O75663	TIP41-like protein [OS=Homo sapiens]	0.882935	1.63251	0.0815676	0.163135	0.407838	Rejected	Rejected	Rejected
P30044-1	Peroxiredoxin-5, mitochondrial [OS=Homo sapiens]	0.957857	1.23699	0.0816216	0.163243	0.408108	Rejected	Rejected	Rejected
P45973	chromobox protein homolog 5 [OS=Homo sapiens]	0.963585	1.16857	0.0816757	0.163351	0.408378	Rejected	Rejected	Rejected
P21283	V-type proton ATPase subunit C 1 [OS=Homo sapiens]	0.957174	1.21835	0.0817297	0.163459	0.408649	Rejected	Rejected	Rejected
Q02809-2	Isoform 2 of Procollagen-lysine,2-oxoglutarate 5-dioxygenase 1 [OS=Homo sapiens]	0.884343	1.5866	0.0817838	0.163568	0.408919	Rejected	Rejected	Rejected
Q9NPD3	Exosome complex component Rrp41 [OS=Homo sapiens]	0.960936	1.2415	0.0818378	0.163676	0.409189	Rejected	Rejected	Rejected
P27694	Replication protein A 70 kDa DNA-binding subunit [OS=Homo sapiens]	0.832432	1.8585	0.0818919	0.163784	0.409459	Rejected	Rejected	Rejected
O15143	Actin-related protein 2/3 complex subunit 1B [OS=Homo sapiens]	0.958629	1.26748	0.0819459	0.163892	0.40973	Rejected	Rejected	Rejected
P06576	ATP synthase subunit beta, mitochondrial [OS=Homo sapiens]	0.294852	7.28611	0.082	0.164	0.41	Rejected	Rejected	Rejected
O60256-1	Phosphoribosyl pyrophosphate synthase-associated protein 2 [OS=Homo sapiens]	0.954804	1.20181	0.0820541	0.164108	0.41027	Rejected	Rejected	Rejected
Q7LG56-6	Isoform 6 of Ribonucleoside-diphosphate reductase subunit M2 B [OS=Homo sapiens]	0.956915	1.25025	0.0821081	0.164216	0.410541	Rejected	Rejected	Rejected
O43818	U3 small nucleolar RNA-interacting protein 2 [OS=Homo sapiens]	0.935913	1.35558	0.0821622	0.164324	0.410811	Rejected	Rejected	Rejected
Q96G03	Phosphoglucomutase-2 [OS=Homo sapiens]	0.840653	1.37098	0.0822162	0.164432	0.411081	Rejected	Rejected	Rejected
Q15398	Disks large-associated protein 5 [OS=Homo sapiens]	0.944354	1.28594	0.0822703	0.164541	0.411351	Rejected	Rejected	Rejected
Q8NFH4	Nucleoporin Nup37 [OS=Homo sapiens]	0.967479	1.15857	0.0823243	0.164649	0.411622	Rejected	Rejected	Rejected
P09496-2	Isoform Non-brain of Clathrin light chain A [OS=Homo sapiens]	0.878276	1.77662	0.0823784	0.164757	0.411892	Rejected	Rejected	Rejected
P62913	60S ribosomal protein L11 [OS=Homo sapiens]	0.946262	1.28403	0.0824324	0.164865	0.412162	Rejected	Rejected	Rejected
Q9Y2L1-1	exosome complex exonuclease RRP44 [OS=Homo sapiens]	0.951814	1.22006	0.0824865	0.164973	0.412432	Rejected	Rejected	Rejected
P35611-3	Isoform 3 of Alpha-adducin [OS=Homo sapiens]	0.827527	2.21958	0.0825405	0.165081	0.412703	Rejected	Rejected	Rejected
Q15437	protein transport protein Sec23B [OS=Homo sapiens]	0.951973	1.20939	0.0825946	0.165189	0.412973	Rejected	Rejected	Rejected
Q8NBJ7-1	Sulfatase-modifying factor 2 [OS=Homo sapiens]	0.936948	1.3517	0.0826486	0.165297	0.413243	Rejected	Rejected	Rejected
O95573	long-chain-fatty-acid--CoA ligase 3 [OS=Homo sapiens]	0.785791	1.71459	0.0827027	0.165405	0.413514	Rejected	Rejected	Rejected
Q7L2H7	Eukaryotic translation initiation factor 3 subunit M [OS=Homo sapiens]	0.943153	1.25204	0.0827568	0.165514	0.413784	Rejected	Rejected	Rejected
P46778	60S ribosomal protein L21 [OS=Homo sapiens]	0.882678	1.78601	0.0828108	0.165622	0.414054	Rejected	Rejected	Rejected
Q14690	Protein RRP5 homolog [OS=Homo sapiens]	0.961863	1.12759	0.0828649	0.16573	0.414324	Rejected	Rejected	Rejected
Q9HBM1	Kinetochore protein Spc25 [OS=Homo sapiens]	0.954313	1.22337	0.0829189	0.165838	0.414595	Rejected	Rejected	Rejected
P24941-1	cyclin-dependent kinase 2 [OS=Homo sapiens]	0.954591	1.20412	0.082973	0.165946	0.414865	Rejected	Rejected	Rejected
Q5BJF2	Transmembrane protein 97 [OS=Homo sapiens]	0.529485	2.31948	0.083027	0.166054	0.415135	Rejected	Rejected	Rejected
P51149	ras-related protein Rab-7a [OS=Homo sapiens]	0.854211	1.97582	0.0830811	0.166162	0.415405	Rejected	Rejected	Rejected
P06454-1	Prothymosin alpha [OS=Homo sapiens]	0.852266	1.71371	0.0831351	0.16627	0.415676	Rejected	Rejected	Rejected
P23634-1	Plasma membrane calcium-transporting ATPase 4 [OS=Homo sapiens]	0.943125	1.22603	0.0831892	0.166378	0.415946	Rejected	Rejected	Rejected
Q56VL3	OCIA domain-containing protein 2 [OS=Homo sapiens]	0.949599	1.23226	0.0832432	0.166486	0.416216	Rejected	Rejected	Rejected
Q13547	histone deacetylase 1 [OS=Homo sapiens]	0.859041	1.54537	0.0832973	0.166595	0.416486	Rejected	Rejected	Rejected
Q15287-1	RNA-binding protein with serine-rich domain 1 [OS=Homo sapiens]	0.959996	1.19512	0.0833514	0.166703	0.416757	Rejected	Rejected	Rejected
P61009	Signal peptidase complex subunit 3 [OS=Homo sapiens]	0.918209	1.35274	0.0834054	0.166811	0.417027	Rejected	Rejected	Rejected
Q8NBS9-1	Thioredoxin domain-containing protein 5 [OS=Homo sapiens]	0.876256	1.64091	0.0834595	0.166919	0.417297	Rejected	Rejected	Rejected
Q08170	Serine/arginine-rich splicing factor 4 [OS=Homo sapiens]	0.944307	1.22235	0.0835135	0.167027	0.417568	Rejected	Rejected	Rejected
Q96HY6-1	DDRGK domain-containing protein 1 [OS=Homo sapiens]	0.934062	1.28576	0.0835676	0.167135	0.417838	Rejected	Rejected	Rejected
Q15274	nicotinate-nucleotide pyrophosphorylase [carboxylating] [OS=Homo sapiens]	0.854829	1.45231	0.0836216	0.167243	0.418108	Rejected	Rejected	Rejected
P42126	Enoyl-CoA delta isomerase 1, mitochondrial [OS=Homo sapiens]	0.940603	1.23145	0.0836757	0.167351	0.418378	Rejected	Rejected	Rejected
P42766	60S ribosomal protein L35 [OS=Homo sapiens]	0.854271	1.80451	0.0837297	0.167459	0.418649	Rejected	Rejected	Rejected
P17480-1	Nucleolar transcription factor 1 [OS=Homo sapiens]	0.944676	1.22885	0.0837838	0.167568	0.418919	Rejected	Rejected	Rejected
Q9UHY1	Nuclear receptor-binding protein [OS=Homo sapiens]	0.926022	1.2645	0.0838378	0.167676	0.419189	Rejected	Rejected	Rejected
P18124	60S ribosomal protein L7 [OS=Homo sapiens]	0.95708	1.15865	0.0838919	0.167784	0.419459	Rejected	Rejected	Rejected
Q9NZL9	Methionine adenosyltransferase 2 subunit beta [OS=Homo sapiens]	0.949775	1.20924	0.0839459	0.167892	0.41973	Rejected	Rejected	Rejected
Q9UDY4	DnaJ homolog subfamily B member 4 [OS=Homo sapiens]	0.956123	1.18993	0.084	0.168	0.42	Rejected	Rejected	Rejected
P82673-1	28S ribosomal protein S35, mitochondrial [OS=Homo sapiens]	0.934508	1.27697	0.0840541	0.168108	0.42027	Rejected	Rejected	Rejected
P78344-1	Eukaryotic translation initiation factor 4 gamma 2 [OS=Homo sapiens]	0.770122	1.77753	0.0841081	0.168216	0.420541	Rejected	Rejected	Rejected
P19174-2	Isoform 2 of 1-phosphatidylinositol 4,5-bisphosphate phosphodiesterase gamma-1 [OS=Homo sapiens]	0.946291	1.24755	0.0841622	0.168324	0.420811	Rejected	Rejected	Rejected
P09417	dihydropteridine reductase [OS=Homo sapiens]	0.917268	1.29487	0.0842162	0.168432	0.421081	Rejected	Rejected	Rejected
Q92734-1	Protein TFG [OS=Homo sapiens]	0.893661	1.45579	0.0842703	0.168541	0.421351	Rejected	Rejected	Rejected
Q9NQ88	Fructose-2,6-bisphosphatase TIGAR [OS=Homo sapiens]	0.931264	1.24629	0.0843243	0.168649	0.421622	Rejected	Rejected	Rejected
Q99627-1	COP9 signalosome complex subunit 8 [OS=Homo sapiens]	0.943389	1.23416	0.0843784	0.168757	0.421892	Rejected	Rejected	Rejected
Q9NXV6	CDKN2A-interacting protein [OS=Homo sapiens]	0.860344	1.69152	0.0844324	0.168865	0.422162	Rejected	Rejected	Rejected
Q96C01	Protein FAM136A [OS=Homo sapiens]	0.938622	1.23142	0.0844865	0.168973	0.422432	Rejected	Rejected	Rejected
Q86UE4	protein LYRIC [OS=Homo sapiens]	0.930872	1.27314	0.0845405	0.169081	0.422703	Rejected	Rejected	Rejected
Q8TC12	Retinol dehydrogenase 11 [OS=Homo sapiens]	0.937406	1.25949	0.0845946	0.169189	0.422973	Rejected	Rejected	Rejected
Q8WYA6	Beta-catenin-like protein 1 [OS=Homo sapiens]	0.645903	2.48254	0.0846486	0.169297	0.423243	Rejected	Rejected	Rejected
P13987	CD59 glycoprotein [OS=Homo sapiens]	0.937637	1.27766	0.0847027	0.169405	0.423514	Rejected	Rejected	Rejected
P10909-2	Isoform 2 of Clusterin [OS=Homo sapiens]	0.915866	1.2919	0.0847568	0.169514	0.423784	Rejected	Rejected	Rejected
Q8WTT2	Nucleolar complex protein 3 homolog [OS=Homo sapiens]	0.906037	1.3169	0.0848108	0.169622	0.424054	Rejected	Rejected	Rejected
P07947	tyrosine-protein kinase Yes [OS=Homo sapiens]	0.911544	1.34918	0.0848649	0.16973	0.424324	Rejected	Rejected	Rejected
Q92797-1	Symplekin [OS=Homo sapiens]	0.927447	1.23282	0.0849189	0.169838	0.424595	Rejected	Rejected	Rejected
Q9Y6G9	Cytoplasmic dynein 1 light intermediate chain 1 [OS=Homo sapiens]	0.934713	1.25477	0.084973	0.169946	0.424865	Rejected	Rejected	Rejected
P55209	Nucleosome assembly protein 1-like 1 [OS=Homo sapiens]	0.928783	1.25558	0.085027	0.170054	0.425135	Rejected	Rejected	Rejected
P62841	40S ribosomal protein S15 [OS=Homo sapiens]	0.904605	1.29415	0.0850811	0.170162	0.425405	Rejected	Rejected	Rejected
P23368-1	NAD-dependent malic enzyme, mitochondrial [OS=Homo sapiens]	0.939596	1.24132	0.0851351	0.17027	0.425676	Rejected	Rejected	Rejected
Q5ZPR3	CD276 antigen [OS=Homo sapiens]	0.935985	1.21826	0.0851892	0.170378	0.425946	Rejected	Rejected	Rejected
O14497	AT-rich interactive domain-containing protein 1A [OS=Homo sapiens]	0.873519	1.52904	0.0852432	0.170486	0.426216	Rejected	Rejected	Rejected
P62857	40S ribosomal protein S28 [OS=Homo sapiens]	0.795109	1.96959	0.0852973	0.170595	0.426486	Rejected	Rejected	Rejected
Q4G0J3-3	Isoform 3 of La-related protein 7 [OS=Homo sapiens]	0.920584	1.25829	0.0853514	0.170703	0.426757	Rejected	Rejected	Rejected
Q13443	disintegrin and metalloproteinase domain-containing protein 9 [OS=Homo sapiens]	0.923513	1.25558	0.0854054	0.170811	0.427027	Rejected	Rejected	Rejected
P13646	Keratin, type I cytoskeletal 13 [OS=Homo sapiens]	0.387273	4.86311	0.0854595	0.170919	0.427297	Rejected	Rejected	Rejected
P80303	Nucleobindin-2 [OS=Homo sapiens]	0.940912	1.17577	0.0855135	0.171027	0.427568	Rejected	Rejected	Rejected
O95881	Thioredoxin domain-containing protein 12 [OS=Homo sapiens]	0.91106	1.34127	0.0855676	0.171135	0.427838	Rejected	Rejected	Rejected
Q6IAA8	ragulator complex protein LAMTOR1 [OS=Homo sapiens]	0.914965	1.24829	0.0856216	0.171243	0.428108	Rejected	Rejected	Rejected
O43172-1	U4/U6 small nuclear ribonucleoprotein Prp4 [OS=Homo sapiens]	0.918926	1.25273	0.0856757	0.171351	0.428378	Rejected	Rejected	Rejected
P48059-3	Isoform 3 of LIM and senescent cell antigen-like-containing domain protein 1 [OS=Homo sapiens]	0.801747	1.86446	0.0857297	0.171459	0.428649	Rejected	Rejected	Rejected
Q08J23	tRNA (Cytosine(34)-C(5))-methyltransferase [OS=Homo sapiens]	0.940461	1.16163	0.0857838	0.171568	0.428919	Rejected	Rejected	Rejected
P42677	40S ribosomal protein S27 [OS=Homo sapiens]	0.923474	1.21954	0.0858378	0.171676	0.429189	Rejected	Rejected	Rejected
P05026	Sodium/potassium-transporting ATPase subunit beta-1 [OS=Homo sapiens]	0.769183	1.94856	0.0858919	0.171784	0.429459	Rejected	Rejected	Rejected
P61513	60S ribosomal protein L37a [OS=Homo sapiens]	0.930438	1.18772	0.0859459	0.171892	0.42973	Rejected	Rejected	Rejected
Q9UBG3	Cornulin [OS=Homo sapiens]	0.902173	1.31162	0.086	0.172	0.43	Rejected	Rejected	Rejected
P11233	Ras-related protein Ral-A [OS=Homo sapiens]	0.912441	1.2446	0.0860541	0.172108	0.43027	Rejected	Rejected	Rejected
P62263	40S ribosomal protein S14 [OS=Homo sapiens]	0.879458	1.46767	0.0861081	0.172216	0.430541	Rejected	Rejected	Rejected
O00541-1	Pescadillo homolog [OS=Homo sapiens]	0.911867	1.24072	0.0861622	0.172324	0.430811	Rejected	Rejected	Rejected
P57088	Transmembrane protein 33 [OS=Homo sapiens]	0.920871	1.21642	0.0862162	0.172432	0.431081	Rejected	Rejected	Rejected
P35080-1	Profilin-2 [OS=Homo sapiens]	0.887051	1.35384	0.0862703	0.172541	0.431351	Rejected	Rejected	Rejected
Q9NRW3	DNA dC->dU-editing enzyme APOBEC-3C [OS=Homo sapiens]	0.924495	1.25423	0.0863243	0.172649	0.431622	Rejected	Rejected	Rejected
Q9BQ67	Glutamate-rich WD repeat-containing protein 1 [OS=Homo sapiens]	0.939842	1.1813	0.0863784	0.172757	0.431892	Rejected	Rejected	Rejected
Q8WX92	Negative elongation factor B [OS=Homo sapiens]	0.928185	1.21184	0.0864324	0.172865	0.432162	Rejected	Rejected	Rejected
Q9Y2D5-4	Isoform 2 of A-kinase anchor protein 2 [OS=Homo sapiens]	0.899245	1.30129	0.0864865	0.172973	0.432432	Rejected	Rejected	Rejected
Q53T59	HCLS1-binding protein 3 [OS=Homo sapiens]	0.916886	1.23037	0.0865405	0.173081	0.432703	Rejected	Rejected	Rejected
Q15738	sterol-4-alpha-carboxylate 3-dehydrogenase, decarboxylating [OS=Homo sapiens]	0.630788	1.78383	0.0865946	0.173189	0.432973	Rejected	Rejected	Rejected
O00592	Podocalyxin [OS=Homo sapiens]	0.929256	1.22107	0.0866486	0.173297	0.433243	Rejected	Rejected	Rejected
Q13098-7	Isoform 2 of COP9 signalosome complex subunit 1 [OS=Homo sapiens]	0.911024	1.22189	0.0867027	0.173405	0.433514	Rejected	Rejected	Rejected
P82650	28S ribosomal protein S22, mitochondrial [OS=Homo sapiens]	0.928484	1.2023	0.0867568	0.173514	0.433784	Rejected	Rejected	Rejected
Q16658	Fascin [OS=Homo sapiens]	0.740039	1.92481	0.0868108	0.173622	0.434054	Rejected	Rejected	Rejected
Q96HJ9-2	Isoform 2 of UPF0562 protein C7orf55 [OS=Homo sapiens]	0.805189	1.38781	0.0868649	0.17373	0.434324	Rejected	Rejected	Rejected
O95292	Vesicle-associated membrane protein-associated protein B/C [OS=Homo sapiens]	0.900875	1.25705	0.0869189	0.173838	0.434595	Rejected	Rejected	Rejected
P49419	Alpha-aminoadipic semialdehyde dehydrogenase [OS=Homo sapiens]	0.826502	1.61678	0.086973	0.173946	0.434865	Rejected	Rejected	Rejected
Q9Y5Z4-1	Heme-binding protein 2 [OS=Homo sapiens]	0.921966	1.21794	0.087027	0.174054	0.435135	Rejected	Rejected	Rejected
O14980	Exportin-1 [OS=Homo sapiens]	0.813456	1.69397	0.0870811	0.174162	0.435405	Rejected	Rejected	Rejected
Q6UX04	Peptidyl-prolyl cis-trans isomerase CWC27 homolog [OS=Homo sapiens]	0.903846	1.19483	0.0871351	0.17427	0.435676	Rejected	Rejected	Rejected
P54687-5	Isoform 5 of Branched-chain-amino-acid aminotransferase, cytosolic [OS=Homo sapiens]	0.851509	1.38594	0.0871892	0.174378	0.435946	Rejected	Rejected	Rejected
P48444	Coatomer subunit delta [OS=Homo sapiens]	0.919104	1.2447	0.0872432	0.174486	0.436216	Rejected	Rejected	Rejected
Q9NUJ1	Mycophenolic acid acyl-glucuronide esterase, mitochondrial [OS=Homo sapiens]	0.890565	1.32447	0.0872973	0.174595	0.436486	Rejected	Rejected	Rejected
Q8TDD1-2	Isoform 2 of ATP-dependent RNA helicase DDX54 [OS=Homo sapiens]	0.931767	1.19328	0.0873514	0.174703	0.436757	Rejected	Rejected	Rejected
P78559-2	Isoform 2 of Microtubule-associated protein 1A [OS=Homo sapiens]	0.913837	1.22404	0.0874054	0.174811	0.437027	Rejected	Rejected	Rejected
O94925-3	Isoform 3 of Glutaminase kidney isoform, mitochondrial [OS=Homo sapiens]	0.904487	1.26988	0.0874595	0.174919	0.437297	Rejected	Rejected	Rejected
Q02241-1	Kinesin-like protein KIF23 [OS=Homo sapiens]	0.932347	1.16838	0.0875135	0.175027	0.437568	Rejected	Rejected	Rejected
P43358	Melanoma-associated antigen 4 [OS=Homo sapiens]	0.759034	1.68502	0.0875676	0.175135	0.437838	Rejected	Rejected	Rejected
O43237	Cytoplasmic dynein 1 light intermediate chain 2 [OS=Homo sapiens]	0.907342	1.2736	0.0876216	0.175243	0.438108	Rejected	Rejected	Rejected
Q13277-1	Syntaxin-3 [OS=Homo sapiens]	0.92331	1.19981	0.0876757	0.175351	0.438378	Rejected	Rejected	Rejected
P30084	Enoyl-CoA hydratase, mitochondrial [OS=Homo sapiens]	0.903951	1.24661	0.0877297	0.175459	0.438649	Rejected	Rejected	Rejected
P10253	lysosomal alpha-glucosidase [OS=Homo sapiens]	0.930386	1.19536	0.0877838	0.175568	0.438919	Rejected	Rejected	Rejected
P46976-1	Glycogenin-1 [OS=Homo sapiens]	0.898788	1.25959	0.0878378	0.175676	0.439189	Rejected	Rejected	Rejected
P62917	60S ribosomal protein L8 [OS=Homo sapiens]	0.855323	1.4997	0.0878919	0.175784	0.439459	Rejected	Rejected	Rejected
Q9UI10-2	Isoform 2 of Translation initiation factor eIF-2B subunit delta [OS=Homo sapiens]	0.866028	1.41793	0.0879459	0.175892	0.43973	Rejected	Rejected	Rejected
Q9BZD4	kinetochore protein nuf2 [OS=Homo sapiens]	0.911783	1.23038	0.088	0.176	0.44	Rejected	Rejected	Rejected
O15269	serine palmitoyltransferase 1 [OS=Homo sapiens]	0.899928	1.26623	0.0880541	0.176108	0.44027	Rejected	Rejected	Rejected
P27797	Calreticulin [OS=Homo sapiens]	0.742364	2.05185	0.0881081	0.176216	0.440541	Rejected	Rejected	Rejected
Q99460	26S proteasome non-ATPase regulatory subunit 1 [OS=Homo sapiens]	0.569	4.19861	0.0881622	0.176324	0.440811	Rejected	Rejected	Rejected
Q9BYD6	39S ribosomal protein L1, mitochondrial [OS=Homo sapiens]	0.930865	1.22935	0.0882162	0.176432	0.441081	Rejected	Rejected	Rejected
P26639-1	Threonine--tRNA ligase, cytoplasmic [OS=Homo sapiens]	0.746213	1.76567	0.0882703	0.176541	0.441351	Rejected	Rejected	Rejected
Q9BVJ6-1	U3 small nucleolar RNA-associated protein 14 homolog A [OS=Homo sapiens]	0.892957	1.23842	0.0883243	0.176649	0.441622	Rejected	Rejected	Rejected
Q7Z3B4	Nucleoporin p54 [OS=Homo sapiens]	0.846573	1.35342	0.0883784	0.176757	0.441892	Rejected	Rejected	Rejected
P35813-3	Isoform 3 of Protein phosphatase 1A [OS=Homo sapiens]	0.897018	1.25916	0.0884324	0.176865	0.442162	Rejected	Rejected	Rejected
O95340-2	Isoform B of Bifunctional 3'-phosphoadenosine 5'-phosphosulfate synthase 2 [OS=Homo sapiens]	0.890356	1.28562	0.0884865	0.176973	0.442432	Rejected	Rejected	Rejected
P52294	Importin subunit alpha-5 [OS=Homo sapiens]	0.917867	1.19458	0.0885405	0.177081	0.442703	Rejected	Rejected	Rejected
Q15269	Periodic tryptophan protein 2 homolog [OS=Homo sapiens]	0.904006	1.2298	0.0885946	0.177189	0.442973	Rejected	Rejected	Rejected
P61019-1	Ras-related protein Rab-2A [OS=Homo sapiens]	0.891438	1.25796	0.0886486	0.177297	0.443243	Rejected	Rejected	Rejected
Q147X3	N-alpha-acetyltransferase 30 [OS=Homo sapiens]	0.825838	1.51767	0.0887027	0.177405	0.443514	Rejected	Rejected	Rejected
P62244	40S ribosomal protein S15a [OS=Homo sapiens]	0.739986	1.81446	0.0887568	0.177514	0.443784	Rejected	Rejected	Rejected
P13929-1	Beta-enolase [OS=Homo sapiens]	0.91441	1.1711	0.0888108	0.177622	0.444054	Rejected	Rejected	Rejected
Q9Y6W5	Wiskott-Aldrich syndrome protein family member 2 [OS=Homo sapiens]	0.930261	1.15838	0.0888649	0.17773	0.444324	Rejected	Rejected	Rejected
Q14151	scaffold attachment factor B2 [OS=Homo sapiens]	0.874207	1.31954	0.0889189	0.177838	0.444595	Rejected	Rejected	Rejected
Q13951-2	Isoform 2 of Core-binding factor subunit beta [OS=Homo sapiens]	0.796791	1.55591	0.088973	0.177946	0.444865	Rejected	Rejected	Rejected
P61421	V-type proton ATPase subunit d 1 [OS=Homo sapiens]	0.88458	1.32138	0.089027	0.178054	0.445135	Rejected	Rejected	Rejected
Q09161	Nuclear cap-binding protein subunit 1 [OS=Homo sapiens]	0.903881	1.21806	0.0890811	0.178162	0.445405	Rejected	Rejected	Rejected
Q9H4G4	Golgi-associated plant pathogenesis-related protein 1 [OS=Homo sapiens]	0.846352	1.4176	0.0891351	0.17827	0.445676	Rejected	Rejected	Rejected
Q8TDN6	Ribosome biogenesis protein BRX1 homolog [OS=Homo sapiens]	0.910235	1.2278	0.0891892	0.178378	0.445946	Rejected	Rejected	Rejected
Q9Y4E8	ubiquitin carboxyl-terminal hydrolase 15 [OS=Homo sapiens]	0.884978	1.2613	0.0892432	0.178486	0.446216	Rejected	Rejected	Rejected
P49792	E3 SUMO-protein ligase RanBP2 [OS=Homo sapiens]	0.712565	2.01535	0.0892973	0.178595	0.446486	Rejected	Rejected	Rejected
P07954	fumarate hydratase, mitochondrial [OS=Homo sapiens]	0.749259	1.90889	0.0893514	0.178703	0.446757	Rejected	Rejected	Rejected
Q96ME7	Zinc finger protein 512 [OS=Homo sapiens]	0.889442	1.25834	0.0894054	0.178811	0.447027	Rejected	Rejected	Rejected
Q96C86	M7GpppX diphosphatase [OS=Homo sapiens]	0.904584	1.25547	0.0894595	0.178919	0.447297	Rejected	Rejected	Rejected
Q9C0C2	182 kDa tankyrase-1-binding protein [OS=Homo sapiens]	0.909138	1.26137	0.0895135	0.179027	0.447568	Rejected	Rejected	Rejected
P09972	Fructose-bisphosphate aldolase C [OS=Homo sapiens]	0.869675	1.30257	0.0895676	0.179135	0.447838	Rejected	Rejected	Rejected
O00139-2	Isoform 2 of Kinesin-like protein KIF2A [OS=Homo sapiens]	0.911512	1.17061	0.0896216	0.179243	0.448108	Rejected	Rejected	Rejected
Q15907	Ras-related protein Rab-11B [OS=Homo sapiens]	0.911705	1.19719	0.0896757	0.179351	0.448378	Rejected	Rejected	Rejected
Q13144	Translation initiation factor eIF-2B subunit epsilon [OS=Homo sapiens]	0.896106	1.22611	0.0897297	0.179459	0.448649	Rejected	Rejected	Rejected
Q9UHB9	Signal recognition particle subunit SRP68 [OS=Homo sapiens]	0.648315	2.31167	0.0897838	0.179568	0.448919	Rejected	Rejected	Rejected
Q96SU4-6	Isoform 6 of Oxysterol-binding protein-related protein 9 [OS=Homo sapiens]	0.884026	1.31166	0.0898378	0.179676	0.449189	Rejected	Rejected	Rejected
P26368	Splicing factor U2AF 65 kDa subunit [OS=Homo sapiens]	0.789311	1.58342	0.0898919	0.179784	0.449459	Rejected	Rejected	Rejected
Q13131-2	Isoform 2 of 5'-AMP-activated protein kinase catalytic subunit alpha-1 [OS=Homo sapiens]	0.884306	1.25586	0.0899459	0.179892	0.44973	Rejected	Rejected	Rejected
Q05397-5	Isoform 5 of Focal adhesion kinase 1 [OS=Homo sapiens]	0.934039	1.16964	0.09	0.18	0.45	Rejected	Rejected	Rejected
O60716-1	Catenin delta-1 [OS=Homo sapiens]	0.8409	1.33937	0.0900541	0.180108	0.45027	Rejected	Rejected	Rejected
P61803	Dolichyl-diphosphooligosaccharide--protein glycosyltransferase subunit DAD1 [OS=Homo sapiens]	0.899326	1.20341	0.0901081	0.180216	0.450541	Rejected	Rejected	Rejected
Q92614-1	Unconventional myosin-XVIIIa [OS=Homo sapiens]	0.920526	1.19084	0.0901622	0.180324	0.450811	Rejected	Rejected	Rejected
Q8NFW8	N-acylneuraminate cytidylyltransferase [OS=Homo sapiens]	0.855912	1.31841	0.0902162	0.180432	0.451081	Rejected	Rejected	Rejected
Q6NZI2-1	polymerase I and transcript release factor [OS=Homo sapiens]	0.918932	1.16825	0.0902703	0.180541	0.451351	Rejected	Rejected	Rejected
P49589-3	Isoform 3 of Cysteine--tRNA ligase, cytoplasmic [OS=Homo sapiens]	0.895513	1.19594	0.0903243	0.180649	0.451622	Rejected	Rejected	Rejected
Q8NC51-3	Isoform 3 of Plasminogen activator inhibitor 1 RNA-binding protein [OS=Homo sapiens]	0.847912	1.3093	0.0903784	0.180757	0.451892	Rejected	Rejected	Rejected
Q8TEA8	D-tyrosyl-tRNA(Tyr) deacylase 1 [OS=Homo sapiens]	0.924126	1.17636	0.0904324	0.180865	0.452162	Rejected	Rejected	Rejected
P06737-1	Glycogen phosphorylase, liver form [OS=Homo sapiens]	0.899987	1.20386	0.0904865	0.180973	0.452432	Rejected	Rejected	Rejected
P52788-1	Spermine synthase [OS=Homo sapiens]	0.821325	1.48108	0.0905405	0.181081	0.452703	Rejected	Rejected	Rejected
P40123	Adenylyl cyclase-associated protein 2 [OS=Homo sapiens]	0.894975	1.21559	0.0905946	0.181189	0.452973	Rejected	Rejected	Rejected
Q9UPN3	Microtubule-actin cross-linking factor 1, isoforms 1/2/3/5 [OS=Homo sapiens]	0.867473	1.26968	0.0906486	0.181297	0.453243	Rejected	Rejected	Rejected
Q8N5K1	CDGSH iron-sulfur domain-containing protein 2 [OS=Homo sapiens]	0.89634	1.21856	0.0907027	0.181405	0.453514	Rejected	Rejected	Rejected
P52209	6-phosphogluconate dehydrogenase, decarboxylating [OS=Homo sapiens]	0.853336	1.32918	0.0907568	0.181514	0.453784	Rejected	Rejected	Rejected
Q09028	Histone-binding protein RBBP4 [OS=Homo sapiens]	0.79159	1.41698	0.0908108	0.181622	0.454054	Rejected	Rejected	Rejected
Q13428-4	Isoform 4 of Treacle protein [OS=Homo sapiens]	0.734214	1.73109	0.0908649	0.18173	0.454324	Rejected	Rejected	Rejected
Q9UKM9-1	RNA-binding protein Raly [OS=Homo sapiens]	0.726069	1.92029	0.0909189	0.181838	0.454595	Rejected	Rejected	Rejected
P35613	Basigin [OS=Homo sapiens]	0.860075	1.33356	0.090973	0.181946	0.454865	Rejected	Rejected	Rejected
O15371	Eukaryotic translation initiation factor 3 subunit D [OS=Homo sapiens]	0.884641	1.27609	0.091027	0.182054	0.455135	Rejected	Rejected	Rejected
Q92597	Protein NDRG1 [OS=Homo sapiens]	0.886751	1.26948	0.0910811	0.182162	0.455405	Rejected	Rejected	Rejected
Q52LJ0-2	Isoform 2 of Protein FAM98B [OS=Homo sapiens]	0.865625	1.2594	0.0911351	0.18227	0.455676	Rejected	Rejected	Rejected
P53985	Monocarboxylate transporter 1 [OS=Homo sapiens]	0.873101	1.25963	0.0911892	0.182378	0.455946	Rejected	Rejected	Rejected
Q9BZG1	Ras-related protein Rab-34 [OS=Homo sapiens]	0.622817	2.46341	0.0912432	0.182486	0.456216	Rejected	Rejected	Rejected
Q92925-1	SWI/SNF-related matrix-associated actin-dependent regulator of chromatin subfamily D member 2 [OS=Homo sapiens]	0.87819	1.2646	0.0912973	0.182595	0.456486	Rejected	Rejected	Rejected
Q14376	UDP-glucose 4-epimerase [OS=Homo sapiens]	0.821731	1.36109	0.0913514	0.182703	0.456757	Rejected	Rejected	Rejected
P50748	Kinetochore-associated protein 1 [OS=Homo sapiens]	0.865695	1.25947	0.0914054	0.182811	0.457027	Rejected	Rejected	Rejected
P07226-1	Tropomyosin alpha-4 chain [OS=Homo sapiens]	0.871415	1.25407	0.0914595	0.182919	0.457297	Rejected	Rejected	Rejected
P07951-2	Isoform 2 of Tropomyosin beta chain [OS=Homo sapiens]	0.897214	1.2348	0.0915135	0.183027	0.457568	Rejected	Rejected	Rejected
P19404	NADH dehydrogenase [ubiquinone] flavoprotein 2, mitochondrial [OS=Homo sapiens]	0.888385	1.24204	0.0915676	0.183135	0.457838	Rejected	Rejected	Rejected
P84101-1	Small EDRK-rich factor 2 [OS=Homo sapiens]	0.898663	1.18233	0.0916216	0.183243	0.458108	Rejected	Rejected	Rejected
P36915-1	Guanine nucleotide-binding protein-like 1 [OS=Homo sapiens]	0.846455	1.2849	0.0916757	0.183351	0.458378	Rejected	Rejected	Rejected
Q06265-2	Isoform 2 of Exosome complex component RRP45 [OS=Homo sapiens]	0.733322	1.71972	0.0917297	0.183459	0.458649	Rejected	Rejected	Rejected
P55809	Succinyl-CoA:3-ketoacid coenzyme A transferase 1, mitochondrial [OS=Homo sapiens]	0.823487	1.37715	0.0917838	0.183568	0.458919	Rejected	Rejected	Rejected
Q96AG4	Leucine-rich repeat-containing protein 59 [OS=Homo sapiens]	0.635254	1.92601	0.0918378	0.183676	0.459189	Rejected	Rejected	Rejected
P07737	profilin-1 [OS=Homo sapiens]	0.812347	1.33831	0.0918919	0.183784	0.459459	Rejected	Rejected	Rejected
P31943	Heterogeneous nuclear ribonucleoprotein H [OS=Homo sapiens]	0.708272	1.70035	0.0919459	0.183892	0.45973	Rejected	Rejected	Rejected
P09104	Gamma-enolase [OS=Homo sapiens]	0.409901	2.69617	0.092	0.184	0.46	Rejected	Rejected	Rejected
Q9HB07	UPF0160 protein MYG1, mitochondrial [OS=Homo sapiens]	0.886239	1.2174	0.0920541	0.184108	0.46027	Rejected	Rejected	Rejected
Q9NXR7-1	Isoform 1 of BRCA1-A complex subunit BRE [OS=Homo sapiens]	0.855915	1.30311	0.0921081	0.184216	0.460541	Rejected	Rejected	Rejected
O14880	Microsomal glutathione S-transferase 3 [OS=Homo sapiens]	0.896018	1.19628	0.0921622	0.184324	0.460811	Rejected	Rejected	Rejected
P62136-1	serine/threonine-protein phosphatase PP1-alpha catalytic subunit [OS=Homo sapiens]	0.883429	1.21603	0.0922162	0.184432	0.461081	Rejected	Rejected	Rejected
P84095	Rho-related GTP-binding protein RhoG [OS=Homo sapiens]	0.868143	1.2879	0.0922703	0.184541	0.461351	Rejected	Rejected	Rejected
P19525	interferon-induced, double-stranded RNA-activated protein kinase [OS=Homo sapiens]	0.8714	1.20976	0.0923243	0.184649	0.461622	Rejected	Rejected	Rejected
Q96I24-1	Far upstream element-binding protein 3 [OS=Homo sapiens]	0.877525	1.22719	0.0923784	0.184757	0.461892	Rejected	Rejected	Rejected
P98175-1	RNA-binding protein 10 [OS=Homo sapiens]	0.853032	1.2833	0.0924324	0.184865	0.462162	Rejected	Rejected	Rejected
Q9NV56	MRG/MORF4L-binding protein [OS=Homo sapiens]	0.877508	1.24715	0.0924865	0.184973	0.462432	Rejected	Rejected	Rejected
P60953	Cell division control protein 42 homolog [OS=Homo sapiens]	0.828964	1.3574	0.0925405	0.185081	0.462703	Rejected	Rejected	Rejected
Q92499	ATP-dependent RNA helicase DDX1 [OS=Homo sapiens]	0.566713	2.20774	0.0925946	0.185189	0.462973	Rejected	Rejected	Rejected
Q9NZU5	LIM and cysteine-rich domains protein 1 [OS=Homo sapiens]	0.869876	1.27052	0.0926486	0.185297	0.463243	Rejected	Rejected	Rejected
Q9Y314	nitric oxide synthase-interacting protein [OS=Homo sapiens]	0.877584	1.21923	0.0927027	0.185405	0.463514	Rejected	Rejected	Rejected
Q16204	coiled-coil domain-containing protein 6 [OS=Homo sapiens]	0.631762	2.00467	0.0927568	0.185514	0.463784	Rejected	Rejected	Rejected
Q9Y5P6-2	Isoform 2 of Mannose-1-phosphate guanyltransferase beta [OS=Homo sapiens]	0.910223	1.16635	0.0928108	0.185622	0.464054	Rejected	Rejected	Rejected
Q9BVC6	Transmembrane protein 109 [OS=Homo sapiens]	0.598204	2.10823	0.0928649	0.18573	0.464324	Rejected	Rejected	Rejected
Q8N8S7	Protein enabled homolog [OS=Homo sapiens]	0.485007	2.6392	0.0929189	0.185838	0.464595	Rejected	Rejected	Rejected
Q9Y5J1	U3 small nucleolar RNA-associated protein 18 homolog [OS=Homo sapiens]	0.832046	1.28856	0.092973	0.185946	0.464865	Rejected	Rejected	Rejected
Q14103	heterogeneous nuclear ribonucleoprotein D0 [OS=Homo sapiens]	0.88593	1.22365	0.093027	0.186054	0.465135	Rejected	Rejected	Rejected
P21796	voltage-dependent anion-selective channel protein 1 [OS=Homo sapiens]	0.607888	2.08992	0.0930811	0.186162	0.465405	Rejected	Rejected	Rejected
Q8NCW5	NAD(P)H-hydrate epimerase [OS=Homo sapiens]	0.859755	1.25344	0.0931351	0.18627	0.465676	Rejected	Rejected	Rejected
P22059	Oxysterol-binding protein 1 [OS=Homo sapiens]	0.862712	1.26045	0.0931892	0.186378	0.465946	Rejected	Rejected	Rejected
Q15007	Pre-mRNA-splicing regulator WTAP [OS=Homo sapiens]	0.843226	1.32346	0.0932432	0.186486	0.466216	Rejected	Rejected	Rejected
P30533	alpha-2-macroglobulin receptor-associated protein [OS=Homo sapiens]	0.543936	2.07386	0.0932973	0.186595	0.466486	Rejected	Rejected	Rejected
Q9BWM7	Sideroflexin-3 [OS=Homo sapiens]	0.870803	1.20741	0.0933514	0.186703	0.466757	Rejected	Rejected	Rejected
P12814-1	Alpha-actinin-1 [OS=Homo sapiens]	0.540198	2.22367	0.0934054	0.186811	0.467027	Rejected	Rejected	Rejected
Q9UQ35	serine/arginine repetitive matrix protein 2 [OS=Homo sapiens]	0.606316	2.13054	0.0934595	0.186919	0.467297	Rejected	Rejected	Rejected
Q15691	Microtubule-associated protein RP/EB family member 1 [OS=Homo sapiens]	0.686286	1.7811	0.0935135	0.187027	0.467568	Rejected	Rejected	Rejected
P06400	Retinoblastoma-associated protein [OS=Homo sapiens]	0.79867	1.38839	0.0935676	0.187135	0.467838	Rejected	Rejected	Rejected
O75122-3	Isoform 3 of CLIP-associating protein 2 [OS=Homo sapiens]	0.913281	1.13196	0.0936216	0.187243	0.468108	Rejected	Rejected	Rejected
Q96A65	Exocyst complex component 4 [OS=Homo sapiens]	0.839757	1.2831	0.0936757	0.187351	0.468378	Rejected	Rejected	Rejected
Q96T76-8	Isoform 5 of MMS19 nucleotide excision repair protein homolog [OS=Homo sapiens]	0.860488	1.24416	0.0937297	0.187459	0.468649	Rejected	Rejected	Rejected
Q02252	Methylmalonate-semialdehyde dehydrogenase [acylating], mitochondrial [OS=Homo sapiens]	0.851301	1.25764	0.0937838	0.187568	0.468919	Rejected	Rejected	Rejected
P04179	Superoxide dismutase [Mn], mitochondrial [OS=Homo sapiens]	0.85501	1.25769	0.0938378	0.187676	0.469189	Rejected	Rejected	Rejected
P53602	Diphosphomevalonate decarboxylase [OS=Homo sapiens]	0.570004	2.14107	0.0938919	0.187784	0.469459	Rejected	Rejected	Rejected
O95218-1	Zinc finger Ran-binding domain-containing protein 2 [OS=Homo sapiens]	0.733389	1.48643	0.0939459	0.187892	0.46973	Rejected	Rejected	Rejected
P43487	Ran-specific GTPase-activating protein [OS=Homo sapiens]	0.658375	1.71615	0.094	0.188	0.47	Rejected	Rejected	Rejected
Q9UBQ7	Glyoxylate reductase/hydroxypyruvate reductase [OS=Homo sapiens]	0.809284	1.34097	0.0940541	0.188108	0.47027	Rejected	Rejected	Rejected
O60885-1	Bromodomain-containing protein 4 [OS=Homo sapiens]	0.744266	1.54162	0.0941081	0.188216	0.470541	Rejected	Rejected	Rejected
P49207	60S ribosomal protein L34 [OS=Homo sapiens]	0.80882	1.35029	0.0941622	0.188324	0.470811	Rejected	Rejected	Rejected
Q6P587-3	Isoform 3 of Acylpyruvase FAHD1, mitochondrial [OS=Homo sapiens]	0.657997	1.86489	0.0942162	0.188432	0.471081	Rejected	Rejected	Rejected
Q9Y5L4	mitochondrial import inner membrane translocase subunit TIM13 [OS=Homo sapiens]	0.841869	1.30815	0.0942703	0.188541	0.471351	Rejected	Rejected	Rejected
Q15428	splicing factor 3a subunit 2 [OS=Homo sapiens]	0.661753	2.05967	0.0943243	0.188649	0.471622	Rejected	Rejected	Rejected
Q8IWX8	Calcium homeostasis endoplasmic reticulum protein [OS=Homo sapiens]	0.839907	1.28728	0.0943784	0.188757	0.471892	Rejected	Rejected	Rejected
P22307-1	Non-specific lipid-transfer protein [OS=Homo sapiens]	0.811055	1.33483	0.0944324	0.188865	0.472162	Rejected	Rejected	Rejected
Q14008-3	Isoform 3 of Cytoskeleton-associated protein 5 [OS=Homo sapiens]	0.747773	1.5027	0.0944865	0.188973	0.472432	Rejected	Rejected	Rejected
P28066-1	Proteasome subunit alpha type-5 [OS=Homo sapiens]	0.538847	2.09598	0.0945405	0.189081	0.472703	Rejected	Rejected	Rejected
P46379-3	Isoform 3 of Large proline-rich protein BAG6 [OS=Homo sapiens]	0.825674	1.29634	0.0945946	0.189189	0.472973	Rejected	Rejected	Rejected
Q9Y2W1	Thyroid hormone receptor-associated protein 3 [OS=Homo sapiens]	0.553487	2.14364	0.0946486	0.189297	0.473243	Rejected	Rejected	Rejected
P50579	methionine aminopeptidase 2 [OS=Homo sapiens]	0.89029	1.17363	0.0947027	0.189405	0.473514	Rejected	Rejected	Rejected
Q16543	Hsp90 co-chaperone Cdc37 [OS=Homo sapiens]	0.80193	1.37344	0.0947568	0.189514	0.473784	Rejected	Rejected	Rejected
P51452	dual specificity protein phosphatase 3 [OS=Homo sapiens]	0.833136	1.26042	0.0948108	0.189622	0.474054	Rejected	Rejected	Rejected
O95202-1	LETM1 and EF-hand domain-containing protein 1, mitochondrial [OS=Homo sapiens]	0.857819	1.24211	0.0948649	0.18973	0.474324	Rejected	Rejected	Rejected
O60684	Importin subunit alpha-7 [OS=Homo sapiens]	0.879162	1.1916	0.0949189	0.189838	0.474595	Rejected	Rejected	Rejected
P47755	F-actin-capping protein subunit alpha-2 [OS=Homo sapiens]	0.867683	1.20575	0.094973	0.189946	0.474865	Rejected	Rejected	Rejected
Q15758-1	Neutral amino acid transporter B(0) [OS=Homo sapiens]	0.875356	1.19284	0.095027	0.190054	0.475135	Rejected	Rejected	Rejected
O94822-3	Isoform 3 of E3 ubiquitin-protein ligase listerin [OS=Homo sapiens]	0.895659	1.16973	0.0950811	0.190162	0.475405	Rejected	Rejected	Rejected
P55263-1	Adenosine kinase [OS=Homo sapiens]	0.824835	1.26582	0.0951351	0.19027	0.475676	Rejected	Rejected	Rejected
Q92599-1	Septin-8 [OS=Homo sapiens]	0.850089	1.22905	0.0951892	0.190378	0.475946	Rejected	Rejected	Rejected
Q07817-1	bcl-2-like protein 1 [OS=Homo sapiens]	0.816863	1.29355	0.0952432	0.190486	0.476216	Rejected	Rejected	Rejected
P84098	60S ribosomal protein L19 [OS=Homo sapiens]	0.707246	1.56186	0.0952973	0.190595	0.476486	Rejected	Rejected	Rejected
Q9H8H0	nucleolar protein 11 [OS=Homo sapiens]	0.613007	1.72507	0.0953514	0.190703	0.476757	Rejected	Rejected	Rejected
P36957	Dihydrolipoyllysine-residue succinyltransferase component of 2-oxoglutarate dehydrogenase complex, mitochondrial [OS=Homo sapiens]	0.442566	2.39763	0.0954054	0.190811	0.477027	Rejected	Rejected	Rejected
Q9H2U1	ATP-dependent RNA helicase DHX36 [OS=Homo sapiens]	0.786424	1.34664	0.0954595	0.190919	0.477297	Rejected	Rejected	Rejected
P62995	transformer-2 protein homolog beta [OS=Homo sapiens]	0.837987	1.25675	0.0955135	0.191027	0.477568	Rejected	Rejected	Rejected
P09661	U2 small nuclear ribonucleoprotein A' [OS=Homo sapiens]	0.45525	2.36373	0.0955676	0.191135	0.477838	Rejected	Rejected	Rejected
Q6UB35-1	Monofunctional C1-tetrahydrofolate synthase, mitochondrial [OS=Homo sapiens]	0.136112	7.57037	0.0956216	0.191243	0.478108	Rejected	Rejected	Rejected
Q86VP6-1	cullin-associated nedd8-dissociated protein 1 [OS=Homo sapiens]	0.795593	1.34356	0.0956757	0.191351	0.478378	Rejected	Rejected	Rejected
Q15102	Platelet-activating factor acetylhydrolase IB subunit gamma [OS=Homo sapiens]	0.878083	1.18365	0.0957297	0.191459	0.478649	Rejected	Rejected	Rejected
P46939-2	Isoform 2 of Utrophin [OS=Homo sapiens]	0.817286	1.29084	0.0957838	0.191568	0.478919	Rejected	Rejected	Rejected
Q9NWV8	BRISC and BRCA1-A complex member 1 [OS=Homo sapiens]	0.850167	1.25619	0.0958378	0.191676	0.479189	Rejected	Rejected	Rejected
P17050	alpha-N-acetylgalactosaminidase [OS=Homo sapiens]	0.708749	1.57137	0.0958919	0.191784	0.479459	Rejected	Rejected	Rejected
P42765	3-ketoacyl-CoA thiolase, mitochondrial [OS=Homo sapiens]	0.811552	1.29725	0.0959459	0.191892	0.47973	Rejected	Rejected	Rejected
Q9NS69	Mitochondrial import receptor subunit TOM22 homolog [OS=Homo sapiens]	0.885064	1.18003	0.096	0.192	0.48	Rejected	Rejected	Rejected
Q8TCA0-1	Leucine-rich repeat-containing protein 20 [OS=Homo sapiens]	0.859651	1.22543	0.0960541	0.192108	0.48027	Rejected	Rejected	Rejected
A6NHR9-1	structural maintenance of chromosomes flexible hinge domain-containing protein 1 [OS=Homo sapiens]	0.809561	1.28702	0.0961081	0.192216	0.480541	Rejected	Rejected	Rejected
Q15424-3	Isoform 3 of Scaffold attachment factor B1 [OS=Homo sapiens]	0.854129	1.2138	0.0961622	0.192324	0.480811	Rejected	Rejected	Rejected
O43493-1	Trans-Golgi network integral membrane protein 2 [OS=Homo sapiens]	0.66502	1.61505	0.0962162	0.192432	0.481081	Rejected	Rejected	Rejected
P16989-2	Isoform 2 of Y-box-binding protein 3 [OS=Homo sapiens]	0.835924	1.23574	0.0962703	0.192541	0.481351	Rejected	Rejected	Rejected
Q9H6F5	Coiled-coil domain-containing protein 86 [OS=Homo sapiens]	0.845353	1.22448	0.0963243	0.192649	0.481622	Rejected	Rejected	Rejected
P05388	60S acidic ribosomal protein P0 [OS=Homo sapiens]	0.394769	2.78617	0.0963784	0.192757	0.481892	Rejected	Rejected	Rejected
Q14116	Interleukin-18 [OS=Homo sapiens]	0.494285	2.25907	0.0964324	0.192865	0.482162	Rejected	Rejected	Rejected
P41250	Glycine--tRNA ligase [OS=Homo sapiens]	0.870528	1.18865	0.0964865	0.192973	0.482432	Rejected	Rejected	Rejected
Q9BVP2	Guanine nucleotide-binding protein-like 3 [OS=Homo sapiens]	0.862273	1.1636	0.0965405	0.193081	0.482703	Rejected	Rejected	Rejected
Q9NX46	Poly(ADP-ribose) glycohydrolase ARH3 [OS=Homo sapiens]	0.802974	1.26581	0.0965946	0.193189	0.482973	Rejected	Rejected	Rejected
Q16666-1	gamma-interferon-inducible protein 16 [OS=Homo sapiens]	0.849804	1.20592	0.0966486	0.193297	0.483243	Rejected	Rejected	Rejected
Q9NYL2-2	Isoform 2 of Mitogen-activated protein kinase kinase kinase MLT [OS=Homo sapiens]	0.82205	1.25347	0.0967027	0.193405	0.483514	Rejected	Rejected	Rejected
O43447	peptidyl-prolyl cis-trans isomerase H [OS=Homo sapiens]	0.808113	1.24766	0.0967568	0.193514	0.483784	Rejected	Rejected	Rejected
Q7RTV0	PHD finger-like domain-containing protein 5A [OS=Homo sapiens]	0.819685	1.26879	0.0968108	0.193622	0.484054	Rejected	Rejected	Rejected
P51991-1	Heterogeneous nuclear ribonucleoprotein A3 [OS=Homo sapiens]	0.736854	1.40526	0.0968649	0.19373	0.484324	Rejected	Rejected	Rejected
Q08211	Atp-dependent rna helicase a [OS=Homo sapiens]	0.67224	1.54952	0.0969189	0.193838	0.484595	Rejected	Rejected	Rejected
Q9P2E9-1	Ribosome-binding protein 1 [OS=Homo sapiens]	0.588293	1.88142	0.096973	0.193946	0.484865	Rejected	Rejected	Rejected
Q9BYT8	Neurolysin, mitochondrial [OS=Homo sapiens]	0.741481	1.40413	0.097027	0.194054	0.485135	Rejected	Rejected	Rejected
P78417	Glutathione S-transferase omega-1 [OS=Homo sapiens]	0.509026	2.02776	0.0970811	0.194162	0.485405	Rejected	Rejected	Rejected
Q9BW19	Kinesin-like protein KIFC1 [OS=Homo sapiens]	0.814161	1.25491	0.0971351	0.19427	0.485676	Rejected	Rejected	Rejected
P49458	Signal recognition particle 9 kDa protein [OS=Homo sapiens]	0.851219	1.20907	0.0971892	0.194378	0.485946	Rejected	Rejected	Rejected
P27144	Adenylate kinase 4, mitochondrial [OS=Homo sapiens]	0.790612	1.31701	0.0972432	0.194486	0.486216	Rejected	Rejected	Rejected
Q9BWD1	Acetyl-CoA acetyltransferase, cytosolic [OS=Homo sapiens]	0.492739	2.17957	0.0972973	0.194595	0.486486	Rejected	Rejected	Rejected
Q15084-2	Isoform 2 of Protein disulfide-isomerase A6 [OS=Homo sapiens]	0.720628	1.42796	0.0973514	0.194703	0.486757	Rejected	Rejected	Rejected
Q14137	Ribosome biogenesis protein BOP1 [OS=Homo sapiens]	0.633436	1.6394	0.0974054	0.194811	0.487027	Rejected	Rejected	Rejected
P0C0S5	Histone H2A.Z [OS=Homo sapiens]	0.700939	1.45858	0.0974595	0.194919	0.487297	Rejected	Rejected	Rejected
Q9P015	39S ribosomal protein L15, mitochondrial [OS=Homo sapiens]	0.794265	1.23743	0.0975135	0.195027	0.487568	Rejected	Rejected	Rejected
O96008	Mitochondrial import receptor subunit TOM40 homolog [OS=Homo sapiens]	0.848917	1.21734	0.0975676	0.195135	0.487838	Rejected	Rejected	Rejected
P46937-9	Isoform 9 of Transcriptional coactivator YAP1 [OS=Homo sapiens]	0.797195	1.2658	0.0976216	0.195243	0.488108	Rejected	Rejected	Rejected
Q8IZP0	abl interactor 1 [OS=Homo sapiens]	0.691407	1.46272	0.0976757	0.195351	0.488378	Rejected	Rejected	Rejected
Q9H9B4	Sideroflexin-1 [OS=Homo sapiens]	0.815072	1.2583	0.0977297	0.195459	0.488649	Rejected	Rejected	Rejected
Q9H4A3-7	Isoform 6 of Serine/threonine-protein kinase WNK1 [OS=Homo sapiens]	0.758549	1.29829	0.0977838	0.195568	0.488919	Rejected	Rejected	Rejected
O43592	Exportin-T [OS=Homo sapiens]	0.83976	1.21638	0.0978378	0.195676	0.489189	Rejected	Rejected	Rejected
Q96TA1	Niban-like protein 1 [OS=Homo sapiens]	0.747441	1.3583	0.0978919	0.195784	0.489459	Rejected	Rejected	Rejected
Q16186	Proteasomal ubiquitin receptor ADRM1 [OS=Homo sapiens]	0.466679	2.17119	0.0979459	0.195892	0.48973	Rejected	Rejected	Rejected
Q8IZL8	Proline-, glutamic acid- and leucine-rich protein 1 [OS=Homo sapiens]	0.857672	1.18202	0.098	0.196	0.49	Rejected	Rejected	Rejected
Q12769	nuclear pore complex protein Nup160 [OS=Homo sapiens]	0.809303	1.24451	0.0980541	0.196108	0.49027	Rejected	Rejected	Rejected
P53618	Coatomer subunit beta [OS=Homo sapiens]	0.401028	2.30602	0.0981081	0.196216	0.490541	Rejected	Rejected	Rejected
Q13247	Serine/arginine-rich splicing factor 6 [OS=Homo sapiens]	0.788076	1.24428	0.0981622	0.196324	0.490811	Rejected	Rejected	Rejected
Q8NBF2-1	NHL repeat-containing protein 2 [OS=Homo sapiens]	0.802904	1.27335	0.0982162	0.196432	0.491081	Rejected	Rejected	Rejected
O60610-1	Protein diaphanous homolog 1 [OS=Homo sapiens]	0.264482	3.82364	0.0982703	0.196541	0.491351	Rejected	Rejected	Rejected
Q96GQ7	Probable ATP-dependent RNA helicase DDX27 [OS=Homo sapiens]	0.272051	5.29845	0.0983243	0.196649	0.491622	Rejected	Rejected	Rejected
Q9NYL9	tropomodulin-3 [OS=Homo sapiens]	0.751088	1.33957	0.0983784	0.196757	0.491892	Rejected	Rejected	Rejected
P49711-1	Transcriptional repressor CTCF [OS=Homo sapiens]	0.831289	1.19836	0.0984324	0.196865	0.492162	Rejected	Rejected	Rejected
Q9UBX3-2	Isoform 2 of Mitochondrial dicarboxylate carrier [OS=Homo sapiens]	0.798424	1.25659	0.0984865	0.196973	0.492432	Rejected	Rejected	Rejected
Q9Y263	Phospholipase A-2-activating protein [OS=Homo sapiens]	0.603508	1.69849	0.0985405	0.197081	0.492703	Rejected	Rejected	Rejected
Q9Y3F4-2	Isoform 2 of Serine-threonine kinase receptor-associated protein [OS=Homo sapiens]	0.573459	1.73489	0.0985946	0.197189	0.492973	Rejected	Rejected	Rejected
P62280	40S ribosomal protein S11 [OS=Homo sapiens]	0.521405	1.87354	0.0986486	0.197297	0.493243	Rejected	Rejected	Rejected
P22102-1	trifunctional purine biosynthetic protein adenosine-3 [OS=Homo sapiens]	0.593415	1.68316	0.0987027	0.197405	0.493514	Rejected	Rejected	Rejected
Q7Z4V5	Hepatoma-derived growth factor-related protein 2 [OS=Homo sapiens]	0.822356	1.25557	0.0987568	0.197514	0.493784	Rejected	Rejected	Rejected
P19387	DNA-directed RNA polymerase II subunit RPB3 [OS=Homo sapiens]	0.796962	1.23558	0.0988108	0.197622	0.494054	Rejected	Rejected	Rejected
O94760-1	N(G),N(G)-dimethylarginine dimethylaminohydrolase 1 [OS=Homo sapiens]	0.838544	1.19856	0.0988649	0.19773	0.494324	Rejected	Rejected	Rejected
Q7L576-1	cytoplasmic FMR1-interacting protein 1 [OS=Homo sapiens]	0.427758	2.14365	0.0989189	0.197838	0.494595	Rejected	Rejected	Rejected
P05198	Eukaryotic translation initiation factor 2 subunit 1 [OS=Homo sapiens]	0.808661	1.24561	0.098973	0.197946	0.494865	Rejected	Rejected	Rejected
Q99496	E3 ubiquitin-protein ligase RING2 [OS=Homo sapiens]	0.76514	1.3108	0.099027	0.198054	0.495135	Rejected	Rejected	Rejected
Q14166	Tubulin--tyrosine ligase-like protein 12 [OS=Homo sapiens]	0.847791	1.18585	0.0990811	0.198162	0.495405	Rejected	Rejected	Rejected
Q9Y3A5	Ribosome maturation protein SBDS [OS=Homo sapiens]	0.501398	1.85447	0.0991351	0.19827	0.495676	Rejected	Rejected	Rejected
Q9NX63	MICOS complex subunit MIC19 [OS=Homo sapiens]	0.829853	1.17344	0.0991892	0.198378	0.495946	Rejected	Rejected	Rejected
Q9P2M7-1	cingulin [OS=Homo sapiens]	0.498208	1.88872	0.0992432	0.198486	0.496216	Rejected	Rejected	Rejected
Q9UMS4	Pre-mRNA-processing factor 19 [OS=Homo sapiens]	0.807878	1.24732	0.0992973	0.198595	0.496486	Rejected	Rejected	Rejected
Q2TAY7	WD40 repeat-containing protein SMU1 [OS=Homo sapiens]	0.560937	1.76474	0.0993514	0.198703	0.496757	Rejected	Rejected	Rejected
P00450	Ceruloplasmin [OS=Homo sapiens]	0.819292	1.2103	0.0994054	0.198811	0.497027	Rejected	Rejected	Rejected
P49411	elongation factor Tu, mitochondrial [OS=Homo sapiens]	0.530006	1.82061	0.0994595	0.198919	0.497297	Rejected	Rejected	Rejected
Q969Z0-1	Protein TBRG4 [OS=Homo sapiens]	0.78494	1.25193	0.0995135	0.199027	0.497568	Rejected	Rejected	Rejected
P39687	Acidic leucine-rich nuclear phosphoprotein 32 family member A [OS=Homo sapiens]	0.77466	1.25729	0.0995676	0.199135	0.497838	Rejected	Rejected	Rejected
P67809	Nuclease-sensitive element-binding protein 1 [OS=Homo sapiens]	0.657074	1.49951	0.0996216	0.199243	0.498108	Rejected	Rejected	Rejected
P18858	DNA ligase 1 [OS=Homo sapiens]	0.785288	1.23065	0.0996757	0.199351	0.498378	Rejected	Rejected	Rejected
P54105	Methylosome subunit pICln [OS=Homo sapiens]	0.819195	1.1915	0.0997297	0.199459	0.498649	Rejected	Rejected	Rejected
P08237-3	Isoform 3 of ATP-dependent 6-phosphofructokinase, muscle type [OS=Homo sapiens]	0.793094	1.25868	0.0997838	0.199568	0.498919	Rejected	Rejected	Rejected
Q12933-2	Isoform 2 of TNF receptor-associated factor 2 [OS=Homo sapiens]	0.672286	1.49824	0.0998378	0.199676	0.499189	Rejected	Rejected	Rejected
P11172	uridine 5'-monophosphate synthase [OS=Homo sapiens]	0.792999	1.24165	0.0998919	0.199784	0.499459	Rejected	Rejected	Rejected
Q9UN86	Ras GTPase-activating protein-binding protein 2 [OS=Homo sapiens]	0.718007	1.33989	0.0999459	0.199892	0.49973	Rejected	Rejected	Rejected
P51659-1	peroxisomal multifunctional enzyme type 2 [OS=Homo sapiens]	0.467123	2.089	0.1	0.2	0.5	Rejected	Rejected	Rejected
Q96EK6	glucosamine 6-phosphate N-acetyltransferase [OS=Homo sapiens]	0.677128	1.4827	0.100054	0.200108	0.50027	Rejected	Rejected	Rejected
Q8IUD2-1	ELKS/Rab6-interacting/CAST family member 1 [OS=Homo sapiens]	0.761548	1.27131	0.100108	0.200216	0.500541	Rejected	Rejected	Rejected
P08621-1	U1 small nuclear ribonucleoprotein 70 kDa [OS=Homo sapiens]	0.555902	1.65728	0.100162	0.200324	0.500811	Rejected	Rejected	Rejected
P56192	Methionine--tRNA ligase, cytoplasmic [OS=Homo sapiens]	0.759405	1.28973	0.100216	0.200432	0.501081	Rejected	Rejected	Rejected
P61160-1	Actin-related protein 2 [OS=Homo sapiens]	0.798286	1.19631	0.10027	0.200541	0.501351	Rejected	Rejected	Rejected
P04792	Heat shock protein beta-1 [OS=Homo sapiens]	0.684471	1.41585	0.100324	0.200649	0.501622	Rejected	Rejected	Rejected
Q9UBI6	guanine nucleotide-binding protein g(i)/g(s)/g(o) subunit gamma-12 [OS=Homo sapiens]	0.50808	1.77979	0.100378	0.200757	0.501892	Rejected	Rejected	Rejected
P40938	replication factor C subunit 3 [OS=Homo sapiens]	0.577643	1.61557	0.100432	0.200865	0.502162	Rejected	Rejected	Rejected
Q14344	Guanine nucleotide-binding protein subunit alpha-13 [OS=Homo sapiens]	0.680275	1.42772	0.100486	0.200973	0.502432	Rejected	Rejected	Rejected
O76003	glutaredoxin-3 [OS=Homo sapiens]	0.470489	1.77368	0.100541	0.201081	0.502703	Rejected	Rejected	Rejected
Q14558-2	Isoform 2 of Phosphoribosyl pyrophosphate synthase-associated protein 1 [OS=Homo sapiens]	0.128442	4.52107	0.100595	0.201189	0.502973	Rejected	Rejected	Rejected
Q10570	Cleavage and polyadenylation specificity factor subunit 1 [OS=Homo sapiens]	0.816641	1.18233	0.100649	0.201297	0.503243	Rejected	Rejected	Rejected
Q6PJG6-1	BRCA1-associated ATM activator 1 [OS=Homo sapiens]	0.810803	1.20365	0.100703	0.201405	0.503514	Rejected	Rejected	Rejected
P37108	Signal recognition particle 14 kDa protein [OS=Homo sapiens]	0.63278	1.45881	0.100757	0.201514	0.503784	Rejected	Rejected	Rejected
Q13561-2	Isoform 2 of Dynactin subunit 2 [OS=Homo sapiens]	0.509402	1.82466	0.100811	0.201622	0.504054	Rejected	Rejected	Rejected
Q86VY4	Testis-specific Y-encoded-like protein 5 [OS=Homo sapiens]	0.512334	1.76328	0.100865	0.20173	0.504324	Rejected	Rejected	Rejected
Q9BY77	Polymerase delta-interacting protein 3 [OS=Homo sapiens]	0.253264	2.67663	0.100919	0.201838	0.504595	Rejected	Rejected	Rejected
Q92552-2	Isoform 2 of 28S ribosomal protein S27, mitochondrial [OS=Homo sapiens]	0.784939	1.22894	0.100973	0.201946	0.504865	Rejected	Rejected	Rejected
Q9H307	Pinin [OS=Homo sapiens]	0.472396	1.82644	0.101027	0.202054	0.505135	Rejected	Rejected	Rejected
P60866-2	Isoform 2 of 40S ribosomal protein S20 [OS=Homo sapiens]	0.449107	1.94284	0.101081	0.202162	0.505405	Rejected	Rejected	Rejected
Q9Y3U8	60S ribosomal protein L36 [OS=Homo sapiens]	0.348906	2.19409	0.101135	0.20227	0.505676	Rejected	Rejected	Rejected
Q9NYF8-1	Bcl-2-associated transcription factor 1 [OS=Homo sapiens]	0.533238	1.76454	0.101189	0.202378	0.505946	Rejected	Rejected	Rejected
Q9Y508-1	E3 ubiquitin-protein ligase RNF114 [OS=Homo sapiens]	0.759	1.23586	0.101243	0.202486	0.506216	Rejected	Rejected	Rejected
Q96EB6	NAD-dependent protein deacetylase sirtuin-1 [OS=Homo sapiens]	0.644997	1.45404	0.101297	0.202595	0.506486	Rejected	Rejected	Rejected
O95825-1	Quinone oxidoreductase-like protein 1 [OS=Homo sapiens]	0.368042	2.24291	0.101351	0.202703	0.506757	Rejected	Rejected	Rejected
P60510	Serine/threonine-protein phosphatase 4 catalytic subunit [OS=Homo sapiens]	0.771233	1.23774	0.101405	0.202811	0.507027	Rejected	Rejected	Rejected
P36507	Dual specificity mitogen-activated protein kinase kinase 2 [OS=Homo sapiens]	0.533511	1.68471	0.101459	0.202919	0.507297	Rejected	Rejected	Rejected
Q9Y2X3	Nucleolar protein 58 [OS=Homo sapiens]	0.204836	3.56904	0.101514	0.203027	0.507568	Rejected	Rejected	Rejected
Q9Y2S7	Polymerase delta-interacting protein 2 [OS=Homo sapiens]	0.783515	1.21269	0.101568	0.203135	0.507838	Rejected	Rejected	Rejected
Q15404-1	Ras suppressor protein 1 [OS=Homo sapiens]	0.698743	1.34048	0.101622	0.203243	0.508108	Rejected	Rejected	Rejected
Q9NR31	GTP-binding protein SAR1a [OS=Homo sapiens]	0.2237	4.30274	0.101676	0.203351	0.508378	Rejected	Rejected	Rejected
Q9Y305-4	Isoform 4 of Acyl-coenzyme A thioesterase 9, mitochondrial [OS=Homo sapiens]	0.690221	1.32576	0.10173	0.203459	0.508649	Rejected	Rejected	Rejected
P08559-4	Isoform 4 of Pyruvate dehydrogenase E1 component subunit alpha, somatic form, mitochondrial [OS=Homo sapiens]	0.471201	1.76395	0.101784	0.203568	0.508919	Rejected	Rejected	Rejected
Q14203-4	Isoform 4 of Dynactin subunit 1 [OS=Homo sapiens]	0.602459	1.51016	0.101838	0.203676	0.509189	Rejected	Rejected	Rejected
P00568	Adenylate kinase isoenzyme 1 [OS=Homo sapiens]	0.697972	1.30311	0.101892	0.203784	0.509459	Rejected	Rejected	Rejected
P17096-3	Isoform HMG-R of High mobility group protein HMG-I/HMG-Y [OS=Homo sapiens]	0.242576	3.61039	0.101946	0.203892	0.50973	Rejected	Rejected	Rejected
O60841	Eukaryotic translation initiation factor 5B [OS=Homo sapiens]	0.447042	1.83728	0.102	0.204	0.51	Rejected	Rejected	Rejected
Q9UMY4-1	Sorting nexin-12 [OS=Homo sapiens]	0.768399	1.21087	0.102054	0.204108	0.51027	Rejected	Rejected	Rejected
Q00688	peptidyl-prolyl cis-trans isomerase FKBP3 [OS=Homo sapiens]	0.514756	1.65539	0.102108	0.204216	0.510541	Rejected	Rejected	Rejected
Q96GC9	Vacuole membrane protein 1 [OS=Homo sapiens]	0.689025	1.30888	0.102162	0.204324	0.510811	Rejected	Rejected	Rejected
Q8TEX9-2	Isoform 2 of Importin-4 [OS=Homo sapiens]	0.518908	1.62231	0.102216	0.204432	0.511081	Rejected	Rejected	Rejected
P35251-1	Replication factor C subunit 1 [OS=Homo sapiens]	0.304035	2.95354	0.10227	0.204541	0.511351	Rejected	Rejected	Rejected
P10809	60 kDa heat shock protein, mitochondrial [OS=Homo sapiens]	0.263367	2.55102	0.102324	0.204649	0.511622	Rejected	Rejected	Rejected
P61981	14-3-3 protein gamma [OS=Homo sapiens]	0.257246	2.45668	0.102378	0.204757	0.511892	Rejected	Rejected	Rejected
Q16850-1	lanosterol 14-alpha demethylase [OS=Homo sapiens]	0.518316	1.62402	0.102432	0.204865	0.512162	Rejected	Rejected	Rejected
P35030	Trypsin-3 [OS=Homo sapiens]	0.572137	1.51627	0.102486	0.204973	0.512432	Rejected	Rejected	Rejected
O15397-1	Importin-8 [OS=Homo sapiens]	0.60256	1.45589	0.102541	0.205081	0.512703	Rejected	Rejected	Rejected
O15372	Eukaryotic translation initiation factor 3 subunit H [OS=Homo sapiens]	0.497242	1.57576	0.102595	0.205189	0.512973	Rejected	Rejected	Rejected
P47914	60S ribosomal protein L29 [OS=Homo sapiens]	0.59609	1.4267	0.102649	0.205297	0.513243	Rejected	Rejected	Rejected
Q99497	Protein deglycase DJ-1 [OS=Homo sapiens]	0.321373	2.17625	0.102703	0.205405	0.513514	Rejected	Rejected	Rejected
Q9NQ48	Leucine zipper transcription factor-like protein 1 [OS=Homo sapiens]	0.708046	1.26435	0.102757	0.205514	0.513784	Rejected	Rejected	Rejected
P54886	delta-1-pyrroline-5-carboxylate synthase [OS=Homo sapiens]	0.448272	1.879	0.102811	0.205622	0.514054	Rejected	Rejected	Rejected
P49756-1	RNA-binding protein 25 [OS=Homo sapiens]	0.547456	1.67608	0.102865	0.20573	0.514324	Rejected	Rejected	Rejected
O00567	Nucleolar protein 56 [OS=Homo sapiens]	0.380302	1.97452	0.102919	0.205838	0.514595	Rejected	Rejected	Rejected
Q6P1N9-1	Putative deoxyribonuclease TATDN1 [OS=Homo sapiens]	0.426811	1.82007	0.102973	0.205946	0.514865	Rejected	Rejected	Rejected
P55084	Trifunctional enzyme subunit beta, mitochondrial [OS=Homo sapiens]	0.485342	1.73504	0.103027	0.206054	0.515135	Rejected	Rejected	Rejected
Q9Y3Y2-3	Isoform 2 of Chromatin target of PRMT1 protein [OS=Homo sapiens]	0.496681	1.61738	0.103081	0.206162	0.515405	Rejected	Rejected	Rejected
Q14195-2	Isoform LCRMP-4 of Dihydropyrimidinase-related protein 3 [OS=Homo sapiens]	0.319754	2.52623	0.103135	0.20627	0.515676	Rejected	Rejected	Rejected
Q9GZP4	PITH domain-containing protein 1 [OS=Homo sapiens]	0.791777	1.17799	0.103189	0.206378	0.515946	Rejected	Rejected	Rejected
Q6PKG0-1	La-related protein 1 [OS=Homo sapiens]	0.338582	2.14806	0.103243	0.206486	0.516216	Rejected	Rejected	Rejected
Q8TEW0	Partitioning defective 3 homolog [OS=Homo sapiens]	0.333139	1.93475	0.103297	0.206595	0.516486	Rejected	Rejected	Rejected
Q92522	Histone H1x [OS=Homo sapiens]	0.277303	2.0918	0.103351	0.206703	0.516757	Rejected	Rejected	Rejected
Q01433-1	AMP deaminase 2 [OS=Homo sapiens]	0.544916	1.45476	0.103405	0.206811	0.517027	Rejected	Rejected	Rejected
P30048	Thioredoxin-dependent peroxide reductase, mitochondrial [OS=Homo sapiens]	0.685913	1.26696	0.103459	0.206919	0.517297	Rejected	Rejected	Rejected
O75643-1	U5 small nuclear ribonucleoprotein 200 kDa helicase [OS=Homo sapiens]	0.448392	1.64432	0.103514	0.207027	0.517568	Rejected	Rejected	Rejected
P37268	squalene synthase [OS=Homo sapiens]	0.304466	2.277	0.103568	0.207135	0.517838	Rejected	Rejected	Rejected
P50995	annexin A11 [OS=Homo sapiens]	0.40153	1.81786	0.103622	0.207243	0.518108	Rejected	Rejected	Rejected
Q02878	60S ribosomal protein L6 [OS=Homo sapiens]	0.521798	1.50747	0.103676	0.207351	0.518378	Rejected	Rejected	Rejected
P02765	Alpha-2-HS-glycoprotein [OS=Homo sapiens]	0.0330118	23.3611	0.10373	0.207459	0.518649	Rejected	Rejected	Rejected
Q13630	GDP-L-fucose synthase [OS=Homo sapiens]	0.352982	1.95171	0.103784	0.207568	0.518919	Rejected	Rejected	Rejected
Q8IWA0	WD repeat-containing protein 75 [OS=Homo sapiens]	0.436545	1.7609	0.103838	0.207676	0.519189	Rejected	Rejected	Rejected
Q9NSE4	Isoleucine--tRNA ligase, mitochondrial [OS=Homo sapiens]	0.241472	2.61131	0.103892	0.207784	0.519459	Rejected	Rejected	Rejected
Q99623	Prohibitin-2 [OS=Homo sapiens]	0.316618	1.96054	0.103946	0.207892	0.51973	Rejected	Rejected	Rejected
P20042	Eukaryotic translation initiation factor 2 subunit 2 [OS=Homo sapiens]	0.585342	1.35106	0.104	0.208	0.52	Rejected	Rejected	Rejected
P26196	Probable ATP-dependent RNA helicase DDX6 [OS=Homo sapiens]	0.412956	1.88449	0.104054	0.208108	0.52027	Rejected	Rejected	Rejected
P15880	40S ribosomal protein S2 [OS=Homo sapiens]	0.325903	1.92627	0.104108	0.208216	0.520541	Rejected	Rejected	Rejected
Q96CS3	FAS-associated factor 2 [OS=Homo sapiens]	0.428259	1.64611	0.104162	0.208324	0.520811	Rejected	Rejected	Rejected
Q5VT79	annexin A8-like protein 1 [OS=Homo sapiens]	0.376464	1.77718	0.104216	0.208432	0.521081	Rejected	Rejected	Rejected
O43670-4	Isoform 4 of BUB3-interacting and GLEBS motif-containing protein ZNF207 [OS=Homo sapiens]	0.771037	1.17708	0.10427	0.208541	0.521351	Rejected	Rejected	Rejected
O00629	Importin subunit alpha-3 [OS=Homo sapiens]	0.607799	1.31474	0.104324	0.208649	0.521622	Rejected	Rejected	Rejected
P09012	U1 SMALL NUCLEAR RIBONUCLEOPROTEIN A [OS=Homo sapiens]	0.660863	1.30965	0.104378	0.208757	0.521892	Rejected	Rejected	Rejected
P29558-1	RNA-binding motif, single-stranded-interacting protein 1 [OS=Homo sapiens]	0.415431	1.85947	0.104432	0.208865	0.522162	Rejected	Rejected	Rejected
Q8NEW0	Zinc transporter 7 [OS=Homo sapiens]	0.335719	1.73813	0.104486	0.208973	0.522432	Rejected	Rejected	Rejected
Q8N3V7-1	synaptopodin [OS=Homo sapiens]	0.371495	1.81183	0.104541	0.209081	0.522703	Rejected	Rejected	Rejected
P19367-3	Isoform 3 of Hexokinase-1 [OS=Homo sapiens]	0.371231	1.69384	0.104595	0.209189	0.522973	Rejected	Rejected	Rejected
P31150	Rab GDP dissociation inhibitor alpha [OS=Homo sapiens]	0.332129	2.18268	0.104649	0.209297	0.523243	Rejected	Rejected	Rejected
P38606	V-type proton ATPase catalytic subunit A [OS=Homo sapiens]	0.330101	1.85226	0.104703	0.209405	0.523514	Rejected	Rejected	Rejected
Q08188	Protein-glutamine gamma-glutamyltransferase E [OS=Homo sapiens]	0.38973	1.72203	0.104757	0.209514	0.523784	Rejected	Rejected	Rejected
Q05DH4	Protein FAM160A1 [OS=Homo sapiens]	0.223176	2.16434	0.104811	0.209622	0.524054	Rejected	Rejected	Rejected
Q9H3H3-3	Isoform 3 of UPF0696 protein C11orf68 [OS=Homo sapiens]	0.202576	2.23117	0.104865	0.20973	0.524324	Rejected	Rejected	Rejected
P62899-2	Isoform 2 of 60S ribosomal protein L31 [OS=Homo sapiens]	0.445378	1.59946	0.104919	0.209838	0.524595	Rejected	Rejected	Rejected
O43491-1	band 4.1-like protein 2 [OS=Homo sapiens]	0.0711319	1.89765	0.104973	0.209946	0.524865	Rejected	Rejected	Rejected
P00491	purine nucleoside phosphorylase [OS=Homo sapiens]	0.0353243	2.1212	0.105027	0.210054	0.525135	Rejected	Rejected	Rejected
P54136-1	arginine--tRNA ligase, cytoplasmic [OS=Homo sapiens]	0.130004	1.87912	0.105081	0.210162	0.525405	Rejected	Rejected	Rejected
P08243-1	Asparagine synthetase [glutamine-hydrolyzing] [OS=Homo sapiens]	0.0517924	2.03015	0.105135	0.21027	0.525676	Rejected	Rejected	Rejected
P07741-1	Adenine phosphoribosyltransferase [OS=Homo sapiens]	0.509133	1.47827	0.105189	0.210378	0.525946	Rejected	Rejected	Rejected
P20962	Parathymosin [OS=Homo sapiens]	0.502969	1.41006	0.105243	0.210486	0.526216	Rejected	Rejected	Rejected
P62249	40S ribosomal protein S16 [OS=Homo sapiens]	0.319781	1.59891	0.105297	0.210595	0.526486	Rejected	Rejected	Rejected
Q15645	Pachytene checkpoint protein 2 homolog [OS=Homo sapiens]	0.226319	1.92847	0.105351	0.210703	0.526757	Rejected	Rejected	Rejected
P61313-1	60S ribosomal protein L15 [OS=Homo sapiens]	0.249683	1.64517	0.105405	0.210811	0.527027	Rejected	Rejected	Rejected
Q7L014	probable ATP-dependent RNA helicase DDX46 [OS=Homo sapiens]	0.231362	1.72055	0.105459	0.210919	0.527297	Rejected	Rejected	Rejected
O75116	Rho-associated protein kinase 2 [OS=Homo sapiens]	0.372278	1.52781	0.105514	0.211027	0.527568	Rejected	Rejected	Rejected
Q9HC38-2	Isoform 2 of Glyoxalase domain-containing protein 4 [OS=Homo sapiens]	0.380182	1.5972	0.105568	0.211135	0.527838	Rejected	Rejected	Rejected
O00233-1	26S proteasome non-ATPase regulatory subunit 9 [OS=Homo sapiens]	0.213596	2.28101	0.105622	0.211243	0.528108	Rejected	Rejected	Rejected
Q15061	WD repeat-containing protein 43 [OS=Homo sapiens]	0.0878115	2.00023	0.105676	0.211351	0.528378	Rejected	Rejected	Rejected
P05141	ADP/ATP translocase 2 [OS=Homo sapiens]	0.184442	1.68077	0.10573	0.211459	0.528649	Rejected	Rejected	Rejected
P12955	xaa-Pro dipeptidase [OS=Homo sapiens]	0.302068	1.65606	0.105784	0.211568	0.528919	Rejected	Rejected	Rejected
Q04917	14-3-3 protein eta [OS=Homo sapiens]	0.390961	1.76774	0.105838	0.211676	0.529189	Rejected	Rejected	Rejected
Q13310-3	Isoform 3 of Polyadenylate-binding protein 4 [OS=Homo sapiens]	0.053655	2.4159	0.105892	0.211784	0.529459	Rejected	Rejected	Rejected
