# Supplementary material for: Proteome-wide identification of HSP70/HSC70 chaperone clients in human cells
Source: PLoS Biol. 2020 Jul 20;18(7):e3000606. doi: 10.1371/journal.pbio.3000606 (PMC7392334; doi:10.1371/journal.pbio.3000606)
Supplement: S5 Data — HSC, heat shock cognate; HSP, heat shock protein; SOD1, superoxide dismutase 1; UBAIT, ubiquitin-activated interaction trap. (XLSX) [file pbio.3000606.s012.xlsx]

## Sheet: Summary
UNIPROT accession numbers and descriptions are shown for HSP70 UBAIT experiments (6 wt and 6 ΔGG samples for GFP-expressing cells and 6 wt and 6 ΔGG samples for GFP + SOD1-expressing cells) and HSC70 UBAIT 6 wt and 6 ΔGG samples for GFP-expressing cells and 6 wt and 6 ΔGG samples for GFP + SOD1-expressing cells).
For each experiment, an enrichment score is shown, based on label-free quantification of bound targets by mass spectrometry and normalization with level of chaperone recovered. Percentile score is calculated based on a boot-strapping method (see Experimental procedures) and is compared with 95 percentile value to determine significance and is then filtered using the Benjamini-Hochberg procedure f…

## Sheet: HSP70 - SOD1 (A4V) High
Uniprot Accession	Description	Untreated Enrichment Score	Untreated Percentile	Untreated 95%	Treated Enrichment Score	Treated Percentile	Treated 95%	Untreated B-H Corrected Q 0.05	Treated B-H Corrected Q 0.05	Untreated Enrichment	Treated Enrichment
Q09666-1	Neuroblast differentiation-associated protein AHNAK [OS=Homo sapiens]	4.7227	1	1.69268	2.58121	1	1.71068	3.00661e-05	3.00661e-05	Enriched	Enriched
P21333	Filamin-A [OS=Homo sapiens]	7.67761	1	1.91127	5.17404	1	1.83289	9.01984e-05	6.01323e-05	Enriched	Enriched
P0DMV8	heat shock 70 kDa protein 1A [OS=Homo sapiens]	1	1	1	1	1	1	0.000120265	9.01984e-05	Rejected	Rejected	Noramlized Bait Protein
Q14315	Filamin-C [OS=Homo sapiens]	6.06575	1	2.36575	7.29558	1	3.52974	0.000150331	0.000120265	Enriched	Enriched
P49327	Fatty acid synthase [OS=Homo sapiens]	12.2412	1	2.16445	6.79242	1	3.08729	0.000240529	0.000150331	Enriched	Enriched
P08238	Heat shock protein HSP 90-beta [OS=Homo sapiens]	19.8671	1	2.51364	8.52341	1	2.07947	0.000330728	0.000180397	Enriched	Enriched
P07900-2	Isoform 2 of Heat shock protein HSP 90-alpha [OS=Homo sapiens]	26.7655	1	2.28446	6.00174	1	2.45477	0.000360794	0.000210463	Enriched	Enriched
O75369-8	Isoform 8 of Filamin-B [OS=Homo sapiens]	3.26948	1	2.20145	4.76717	1	2.90677	0.00039086	0.000240529	Enriched	Enriched
P13639	Elongation factor 2 [OS=Homo sapiens]	7.70668	1	2.28343	13.0181	1	3.19994	0.000541191	0.000270595	Enriched	Enriched
Q13085-4	Isoform 4 of Acetyl-CoA carboxylase 1 [OS=Homo sapiens]	8.79611	1	2.02876	3.95722	1	1.93485	0.000571257	0.000300661	Enriched	Enriched
P11498	pyruvate carboxylase, mitochondrial [OS=Homo sapiens]	6.70196	1	1.76755	4.00858	1	1.84054	0.000661455	0.000330728	Enriched	Enriched
P05165-1	Propionyl-CoA carboxylase alpha chain, mitochondrial [OS=Homo sapiens]	3.45973	1	1.66848	3.17175	1	1.53349	0.00078172	0.000360794	Enriched	Enriched
P31948-2	Isoform 2 of Stress-induced-phosphoprotein 1 [OS=Homo sapiens]	10.4601	1	3.319	7.01466	1	3.23868	0.000811786	0.00039086	Enriched	Enriched
P22314-2	Isoform 2 of Ubiquitin-like modifier-activating enzyme 1 [OS=Homo sapiens]	21.2734	1	2.16776	7.28216	1	3.35258	0.000841852	0.000420926	Enriched	Enriched
Q02790	Peptidyl-prolyl cis-trans isomerase FKBP4 [OS=Homo sapiens]	7.62589	1	2.53423	8.97516	1	5.35282	0.000932051	0.000450992	Enriched	Enriched
Q92598	Heat shock protein 105 kDa [OS=Homo sapiens]	15.3428	1	3.34473	7.91819	1	3.14839	0.000962117	0.000481058	Enriched	Enriched
Q13200	26S proteasome non-ATPase regulatory subunit 2 [OS=Homo sapiens]	24.2782	1	2.47832	10.0639	1	3.20865	0.00105232	0.000511124	Enriched	Enriched
Q08211	Atp-dependent rna helicase a [OS=Homo sapiens]	4.87438	1	2.15988	33.431	1	16.6294	0.00114251	0.000541191	Enriched	Enriched
P07355-2	Isoform 2 of Annexin A2 [OS=Homo sapiens]	5.33924	1	1.91642	4.02613	1	2.11402	0.00117258	0.000571257	Enriched	Enriched
P68104	Elongation factor 1-alpha 1 [OS=Homo sapiens]	5.00024	1	1.75017	3.9136	1	1.943	0.00135298	0.000601323	Enriched	Enriched
P05783	Keratin, type I cytoskeletal 18 [OS=Homo sapiens]	2.51001	1	1.54209	3.76803	1	2.12961	0.00147324	0.000631389	Enriched	Enriched
P48681	Nestin [OS=Homo sapiens]	3.60194	1	1.76669	3.71696	1	2.00079	0.00153337	0.000661455	Enriched	Enriched
P49321	Nuclear autoantigenic sperm protein [OS=Homo sapiens]	9.90949	1	6.1698	4.57894	1	2.12135	0.00156344	0.000691521	Enriched	Enriched
P27816-1	Microtubule-associated protein 4 [OS=Homo sapiens]	3.1252	1	1.62964	3.09801	1	1.74761	0.00165364	0.000721587	Enriched	Enriched
Q7Z6Z7	E3 ubiquitin-protein ligase HUWE1 [OS=Homo sapiens]	42.4823	1	3.13696	5.39412	1	1.87418	0.00183403	0.000751654	Enriched	Enriched
P62258-1	14-3-3 protein epsilon [OS=Homo sapiens]	8.67833	1	3.67872	5.53654	1	2.28358	0.00198437	0.00078172	Enriched	Enriched
Q99460	26S proteasome non-ATPase regulatory subunit 1 [OS=Homo sapiens]	5.05937	1	2.32812	7.97811	1	2.53155	0.00201443	0.000811786	Enriched	Enriched
P09874	Poly [ADP-ribose] polymerase 1 [OS=Homo sapiens]	12.7879	1	3.39915	7.44482	1	3.45291	0.0020445	0.000841852	Enriched	Enriched
P60174	Triosephosphate isomerase [OS=Homo sapiens]	5.38219	1	2.15468	4.08873	1	2.05767	0.00243536	0.000871918	Enriched	Enriched
P43243	Matrin-3 [OS=Homo sapiens]	5.27746	1	2.3549	12.8414	1	6.79299	0.00252556	0.000901984	Enriched	Enriched
P26641-2	Isoform 2 of Elongation factor 1-gamma [OS=Homo sapiens]	11.6549	1	2.49668	2.46307	1	1.76397	0.00255562	0.000932051	Enriched	Enriched
P45974-1	Ubiquitin carboxyl-terminal hydrolase 5 [OS=Homo sapiens]	38.3651	1	2.2429	7.83588	1	2.52673	0.00264582	0.000962117	Enriched	Enriched
Q6P2Q9	Pre-mRNA-processing-splicing factor 8 [OS=Homo sapiens]	13.4731	1	5.02753	5.11037	1	2.7494	0.00282622	0.000992183	Enriched	Enriched
Q14839-2	Isoform 2 of Chromodomain-helicase-DNA-binding protein 4 [OS=Homo sapiens]	3.15815	1	2.3417	5.06988	1	2.91446	0.00297655	0.00102225	Enriched	Enriched
P46060	Ran GTPase-activating protein 1 [OS=Homo sapiens]	3.05452	1	1.86621	2.30711	1	1.54285	0.00312688	0.00105232	Enriched	Enriched
P22234	multifunctional protein ADE2 [OS=Homo sapiens]	5.24108	1	1.99053	3.66714	1	2.26784	0.00315695	0.00108238	Enriched	Enriched
Q96RQ3	Methylcrotonoyl-CoA carboxylase subunit alpha, mitochondrial [OS=Homo sapiens]	5.05151	1	1.83073	13.0034	1	9.60477	0.00330728	0.00111245	Enriched	Enriched
Q9UQ80	proliferation-associated protein 2G4 [OS=Homo sapiens]	8.47419	1	2.82319	8.56599	1	4.68645	0.00336741	0.00114251	Enriched	Enriched
Q9Y265	RuvB-like 1 [OS=Homo sapiens]	2.13265	1	1.42056	2.12211	1	1.45476	0.00351774	0.00117258	Enriched	Enriched
Q16658	Fascin [OS=Homo sapiens]	4.96623	1	1.86164	8.46086	1	2.78215	0.00393867	0.00120265	Enriched	Enriched
Q86T24	Transcriptional regulator Kaiso [OS=Homo sapiens]	3.2485	1	1.57064	3.63017	1	1.73764	0.00402886	0.00123271	Enriched	Enriched
Q9Y266	nuclear migration protein nudC [OS=Homo sapiens]	3.01416	1	2.22401	7.39717	1	2.41394	0.00420926	0.00126278	Enriched	Enriched
Q9ULH7-5	Isoform 5 of MKL/myocardin-like protein 2 [OS=Homo sapiens]	4.84784	1	2.01682	4.29807	1	1.77509	0.00435959	0.00129284	Enriched	Enriched
Q6NZI2-1	caveolae-associated protein 1 [OS=Homo sapiens]	88.0847	1	4.65075	19.9958	1	2.97439	0.00444979	0.00132291	Enriched	Enriched
P55884-2	Isoform 2 of Eukaryotic translation initiation factor 3 subunit B [OS=Homo sapiens]	5.45806	1	2.70234	6.65477	1	2.21596	0.00453999	0.00135298	Enriched	Enriched
P16403	Histone H1.2 [OS=Homo sapiens]	5.19749	1	2.91714	7.97714	1	2.68864	0.00457005	0.00138304	Enriched	Enriched
Q99615-1	DnaJ homolog subfamily C member 7 [OS=Homo sapiens]	16.0462	1	2.34601	5.83782	1	2.34974	0.00481058	0.00141311	Enriched	Enriched
P18124	60S ribosomal protein L7 [OS=Homo sapiens]	4.04676	1	2.54401	6.12106	1	3.74652	0.00505111	0.00144317	Enriched	Enriched
P50502	Hsc70-interacting protein [OS=Homo sapiens]	165.591	1	2.55802	40.05	1	3.0396	0.00538184	0.00147324	Enriched	Enriched
P60900	Proteasome subunit alpha type-6 [OS=Homo sapiens]	6.18728	1	1.92273	8.16424	1	2.89988	0.0055923	0.00150331	Enriched	Enriched
Q14247-1	Src substrate cortactin [OS=Homo sapiens]	3.06944	1	1.95245	2.9061	1	1.75322	0.0056825	0.00153337	Enriched	Enriched
P78344-1	Eukaryotic translation initiation factor 4 gamma 2 [OS=Homo sapiens]	6.8424	1	2.46048	60.777	1	3.2472	0.0057727	0.00156344	Enriched	Enriched
P62826	GTP-binding nuclear protein RAN [OS=Homo sapiens]	7.8114	1	2.65854	2.94069	1	1.8661	0.0058629	0.00159351	Enriched	Enriched
Q14683	structural maintenance of chromosomes protein 1a [OS=Homo sapiens]	11.8328	1	4.11548	64.8497	1	17.5501	0.0060433	0.00162357	Enriched	Enriched
P53992	Protein transport protein sec24c [OS=Homo sapiens]	6.50391	1	2.42042	20.2905	1	5.62904	0.00613349	0.00165364	Enriched	Enriched
P55036-1	26S proteasome non-ATPase regulatory subunit 4 [OS=Homo sapiens]	6.85232	1	2.56987	4.10215	1	2.27243	0.00616356	0.0016837	Enriched	Enriched
P62081	40S ribosomal protein S7 [OS=Homo sapiens]	56.0232	1	2.91709	18.1736	1	4.02761	0.00634396	0.00171377	Enriched	Enriched
P62820	Ras-related protein Rab-1A [OS=Homo sapiens]	14.8145	1	3.46447	5.67488	1	2.30195	0.00637402	0.00174384	Enriched	Enriched
Q13423	NAD(P) transhydrogenase, mitochondrial [OS=Homo sapiens]	25.2356	1	17.609	4.5255	1	2.10382	0.00670475	0.0017739	Enriched	Enriched
Q96T76-8	Isoform 5 of MMS19 nucleotide excision repair protein homolog [OS=Homo sapiens]	9.51847	1	5.64858	18.5737	1	9.38157	0.00676488	0.00180397	Enriched	Enriched
Q9Y6M1	Insulin-like growth factor 2 mRNA-binding protein 2 [OS=Homo sapiens]	5.58421	1	2.45409	9.5809	1	2.38469	0.00682502	0.00183403	Enriched	Enriched
P54727	UV excision repair protein RAD23 homolog B [OS=Homo sapiens]	79.3452	1	3.70988	34.3204	1	2.82733	0.00694528	0.0018641	Enriched	Enriched
P60953	Cell division control protein 42 homolog [OS=Homo sapiens]	9.00553	1	3.07603	7.66837	1	2.51574	0.00700541	0.00189417	Enriched	Enriched
Q9NQC3-2	Isoform 2 of Reticulon-4 [OS=Homo sapiens]	2.45919	1	1.72251	6.75204	1	3.25622	0.0074564	0.00192423	Enriched	Enriched
P13798	Acylamino-acid-releasing enzyme [OS=Homo sapiens]	8.25969	1	3.94083	11.0432	1	3.59509	0.00748647	0.0019543	Enriched	Enriched
Q03135	Caveolin-1 [OS=Homo sapiens]	4.80325	1	2.45058	27.4075	1	9.54523	0.007727	0.00198437	Enriched	Enriched
O75182-1	paired amphipathic helix protein sin3b [OS=Homo sapiens]	3.06205	1	1.71437	3.37157	1	1.9434	0.00832832	0.00201443	Enriched	Enriched
O43765	Small glutamine-rich tetratricopeptide repeat-containing protein alpha [OS=Homo sapiens]	14.8434	1	3.87336	3.69602	1	2.21688	0.00838845	0.0020445	Enriched	Enriched
Q13501-1	sequestosome-1 [OS=Homo sapiens]	27.4966	1	2.58378	5.86212	1	2.12718	0.00841852	0.00207456	Enriched	Enriched
Q13617-2	Isoform 2 of Cullin-2 [OS=Homo sapiens]	2.44162	1	1.70054	3.82821	1	2.20948	0.00844859	0.00210463	Enriched	Enriched
P46783	40S ribosomal protein S10 [OS=Homo sapiens]	10.2795	1	2.50022	6.84236	1	2.75101	0.00853879	0.0021347	Enriched	Enriched
P40429	60S ribosomal protein L13a [OS=Homo sapiens]	1.64519	1	1.41269	3.23574	1	1.8858	0.00859892	0.00216476	Enriched	Enriched
Q8TAT6-2	Isoform 2 of Nuclear protein localization protein 4 homolog [OS=Homo sapiens]	15.2078	1	4.35569	5.9938	1	2.56796	0.00865905	0.00219483	Enriched	Enriched
Q04323-2	Isoform 2 of UBX domain-containing protein 1 [OS=Homo sapiens]	16.8492	1	2.95854	22.8379	1	2.71595	0.00868912	0.00222489	Enriched	Enriched
P08240-1	signal recognition particle receptor subunit alpha [OS=Homo sapiens]	5.59644	1	2.40442	5.12389	1	3.29679	0.00892965	0.00225496	Enriched	Enriched
Q99755	Phosphatidylinositol 4-phosphate 5-kinase type-1 alpha [OS=Homo sapiens]	17.6423	1	2.98707	7.98802	1	2.22319	0.00901984	0.00228503	Enriched	Enriched
P28070	Proteasome subunit beta type-4 [OS=Homo sapiens]	3.87102	1	2.16281	3.75117	1	2.03408	0.0094107	0.00231509	Enriched	Enriched
Q99426	tubulin-folding cofactor B [OS=Homo sapiens]	3.70887	1	1.88707	45.9256	1	5.54064	0.0095911	0.00234516	Enriched	Enriched
Q01650	large neutral amino acids transporter small subunit 1 [OS=Homo sapiens]	11.9508	1	2.78117	24.6047	1	2.73561	0.00965123	0.00237523	Enriched	Enriched
Q9H832	Ubiquitin-conjugating enzyme E2 Z [OS=Homo sapiens]	143.001	1	3.98782	50.1319	1	2.16691	0.0096813	0.00240529	Enriched	Enriched
Q969T9	WW domain-binding protein 2 [OS=Homo sapiens]	37.7731	1	2.42666	5.56683	1	2.08103	0.0110643	0.00243536	Enriched	Enriched
P54252	Ataxin-3 [OS=Homo sapiens]	14.6788	1	3.1302	37.2133	1	3.28383	0.0110944	0.00246542	Enriched	Enriched
Q53GL7	Poly [ADP-ribose] polymerase 10 [OS=Homo sapiens]	14.818	1	3.14452	13.8069	1	3.83915	0.0112447	0.00249549	Enriched	Enriched
P48509	CD151 antigen [OS=Homo sapiens]	20.8711	1	3.04803	31.2918	1	6.98354	0.0113049	0.00252556	Enriched	Enriched
P08962	CD63 antigen [OS=Homo sapiens]	20.908	1	2.6088	23.3208	1	3.40262	0.0116957	0.00255562	Enriched	Enriched
Q7Z6K5-2	Isoform C15orf38-AP3S2 of Arpin [OS=Homo sapiens]	5.59977	1	2.7092	2.40513	1	1.67909	0.011816	0.00258569	Enriched	Enriched
Q9H7C9-1	Mth938 domain-containing protein [OS=Homo sapiens]	4.7049	1	2.22935	5.62992	1	3.74882	0.0118761	0.00261575	Enriched	Enriched
Q8IVM0-2	Isoform 2 of Coiled-coil domain-containing protein 50 [OS=Homo sapiens]	33.0474	1	3.04105	28.1321	1	2.32726	0.0120866	0.00264582	Enriched	Enriched
P61247	40S ribosomal protein S3a [OS=Homo sapiens]	1.78711	0.999	1.4605	3.13057	1	1.81778	0.0124474	0.00267589	Enriched	Enriched
O75663	TIP41-like protein [OS=Homo sapiens]	1.86	0.999	1.45838	2.11115	1	1.54764	0.0129886	0.00270595	Enriched	Enriched
O95864	fatty acid desaturase 2 [OS=Homo sapiens]	30.8087	0.998	7.95692	104.956	1	4.87752	0.0144017	0.00273602	Enriched	Enriched
Q9GZU8	Protein FAM192A [OS=Homo sapiens]	6.44787	0.998	3.05906	12.6391	1	4.44303	0.0145219	0.00276609	Enriched	Enriched
Q14126	Desmoglein-2 [OS=Homo sapiens]	6.38668	0.998	2.61241	36.3583	1	2.39231	0.014552	0.00279615	Enriched	Enriched
P26639-1	Threonine--tRNA ligase, cytoplasmic [OS=Homo sapiens]	4.12967	0.997	2.95633	8.49764	1	2.73341	0.0148226	0.00282622	Enriched	Enriched
O43242	26S proteasome non-ATPase regulatory subunit 3 [OS=Homo sapiens]	6.16963	0.997	4.67771	20.5908	1	6.47442	0.0148827	0.00285628	Enriched	Enriched
O60664-1	Perilipin-3 [OS=Homo sapiens]	3.15575	0.997	2.08112	5.87257	1	2.44414	0.0149128	0.00288635	Enriched	Enriched
P00367	Glutamate dehydrogenase 1, mitochondrial [OS=Homo sapiens]	4.81801	0.997	2.33779	18.1096	1	4.55997	0.0150932	0.00291642	Enriched	Enriched
Q02543	60S ribosomal protein L18a [OS=Homo sapiens]	2.89778	0.997	2.24165	2.84627	1	1.74881	0.0153037	0.00294648	Enriched	Enriched
Q13813	Spectrin alpha chain, non-erythrocytic 1 [OS=Homo sapiens]	3.70249	0.996	3.20288	6.63282	1	3.88314	0.0157246	0.00297655	Enriched	Enriched
Q13247	Serine/arginine-rich splicing factor 6 [OS=Homo sapiens]	10.6212	0.996	9.44141	3.41792	1	2.46959	0.0161155	0.00300661	Enriched	Enriched
P61604	10 kDa heat shock protein, mitochondrial [OS=Homo sapiens]	5.4438	0.996	3.54643	13.2241	1	3.2272	0.0161756	0.00303668	Enriched	Enriched
Q05086	Ubiquitin-protein ligase E3A [OS=Homo sapiens]	4.45623	0.996	2.35999	15.0602	1	4.90847	0.0164161	0.00306675	Enriched	Enriched
Q7Z569	BRCA1-associated protein [OS=Homo sapiens]	13.1361	0.996	3.36732	69.1787	1	3.02752	0.0165063	0.00309681	Enriched	Enriched
P06748	Nucleophosmin [OS=Homo sapiens]	3.49508	0.993	2.98575	9.13755	1	2.27902	0.0185207	0.00312688	Enriched	Enriched
P26373-1	60S ribosomal protein L13 [OS=Homo sapiens]	2.06631	0.993	1.6787	2.58335	1	1.73351	0.0187913	0.00315695	Enriched	Enriched
Q96NL8	protein C8orf37 [OS=Homo sapiens]	1.78557	0.993	1.51974	4.68819	1	1.79643	0.0192724	0.00318701	Enriched	Enriched
P35222	Catenin beta-1 [OS=Homo sapiens]	3.75873	0.992	2.44319	5.11154	1	2.27986	0.0195731	0.00321708	Enriched	Enriched
Q8IUD2-1	ELKS/Rab6-interacting/CAST family member 1 [OS=Homo sapiens]	8.3772	0.991	5.7481	7.04201	1	3.91183	0.0202345	0.00324714	Enriched	Enriched
Q15369-1	elongin-C [OS=Homo sapiens]	3.57904	0.99	2.29703	18.5316	1	4.94221	0.0207156	0.00327721	Enriched	Enriched
P00338-3	Isoform 3 of L-lactate dehydrogenase A chain [OS=Homo sapiens]	1.75535	0.987	1.59949	4.72279	1	2.25993	0.0218882	0.00330728	Enriched	Enriched
P11388-4	Isoform 4 of DNA topoisomerase 2-alpha [OS=Homo sapiens]	4.25167	0.987	3.48352	25.2083	1	5.65088	0.0219182	0.00333734	Enriched	Enriched
O60313-2	Isoform 2 of Dynamin-like 120 kDa protein, mitochondrial [OS=Homo sapiens]	20.6903	0.987	3.63374	25.1274	1	4.02457	0.0221287	0.00336741	Enriched	Enriched
P20962	Parathymosin [OS=Homo sapiens]	6.4593	0.987	5.45025	12.7156	1	3.33845	0.022279	0.00339747	Enriched	Enriched
Q12888-2	Isoform 2 of TP53-binding protein 1 [OS=Homo sapiens]	1.97311	0.983	1.73788	3.17211	1	1.93843	0.0232111	0.00342754	Enriched	Enriched
P40763	Signal transducer and activator of transcription 3 [OS=Homo sapiens]	8.25481	0.981	5.45379	38.4837	1	14.1061	0.0238425	0.00345761	Enriched	Enriched
Q9UNZ2-5	Isoform 3 of NSFL1 cofactor p47 [OS=Homo sapiens]	5.47039	0.978	4.30002	4.45655	1	2.43115	0.0247745	0.00348767	Enriched	Enriched
Q6IBS0	Twinfilin-2 [OS=Homo sapiens]	1.58564	0.973	1.53086	6.2892	1	2.83653	0.026368	0.00351774	Rejected	Enriched
P61011-1	signal recognition particle 54 kDa protein [OS=Homo sapiens]	2.86756	0.973	2.39894	24.9403	1	4.22966	0.0264883	0.00354781	Rejected	Enriched
P13674-1	prolyl 4-hydroxylase subunit alpha-1 [OS=Homo sapiens]	2.87455	0.973	2.70808	4.16159	1	2.28896	0.0265785	0.00357787	Rejected	Enriched
P09455-1	Retinol-binding protein 1 [OS=Homo sapiens]	4.20139	0.972	2.3482	7.44521	1	2.74488	0.0267589	0.00360794	Rejected	Enriched
Q16186	Proteasomal ubiquitin receptor ADRM1 [OS=Homo sapiens]	12.0552	0.972	10.1944	13.4426	1	2.22686	0.0269092	0.003638	Rejected	Enriched
Q8NBS9-1	Thioredoxin domain-containing protein 5 [OS=Homo sapiens]	2.53753	0.971	2.39532	5.26235	1	2.50471	0.0270595	0.00366807	Rejected	Enriched
P50213-1	Isocitrate dehydrogenase [NAD] subunit alpha, mitochondrial [OS=Homo sapiens]	3.87307	0.971	2.6469	9.07589	1	3.53181	0.0273301	0.00369814	Rejected	Enriched
P63241-2	Isoform 2 of Eukaryotic translation initiation factor 5A-1 [OS=Homo sapiens]	2.65325	0.968	2.43536	6.29951	1	3.30507	0.0279014	0.0037282	Rejected	Enriched
P49006	MARCKS-related protein [OS=Homo sapiens]	2.10106	0.968	1.91462	6.45058	1	2.51393	0.0280517	0.00375827	Rejected	Enriched
Q9Y676	28S ribosomal protein S18b, mitochondrial [OS=Homo sapiens]	16.7898	0.967	12.99	10.1186	1	4.72557	0.0283223	0.00378833	Rejected	Enriched
Q63HN8-4	Isoform 2 of E3 ubiquitin-protein ligase RNF213 [OS=Homo sapiens]	4.8971	0.96	4.82636	12.4666	1	3.09253	0.0294348	0.0038184	Rejected	Enriched
Q01995	transgelin [OS=Homo sapiens]	2.73588	0.957	2.59378	2.74482	1	1.91943	0.0298256	0.00384847	Rejected	Enriched
Q13126-1	S-methyl-5'-thioadenosine phosphorylase [OS=Homo sapiens]	5.14678	0.956	4.87773	23.3079	1	2.64293	0.0300361	0.00387853	Rejected	Enriched
P07951-2	Isoform 2 of Tropomyosin beta chain [OS=Homo sapiens]	4.70889	0.953	4.63576	9.46577	1	2.80297	0.030457	0.0039086	Rejected	Enriched
Q9H1E3	Nuclear ubiquitous casein and cyclin-dependent kinase substrate 1 [OS=Homo sapiens]	3.50186	0.953	3.48192	8.78891	1	3.13119	0.0305472	0.00393867	Rejected	Enriched
Q9Y5B9	FACT complex subunit SPT16 [OS=Homo sapiens]	2.59756	0.951	2.58268	4.59038	1	2.61314	0.0308479	0.00396873	Rejected	Enriched
Q9Y3Y2-3	Isoform 2 of Chromatin target of PRMT1 protein [OS=Homo sapiens]	1.3236	0.95	1.31544	3.20529	1	2.15404	0.031359	0.0039988	Rejected	Enriched
Q5JWF2-1	Guanine nucleotide-binding protein G(S) subunit alpha isoforms XLas [OS=Homo sapiens]	2.77049	0.947	2.8533	11.3753	1	2.48982	0.0317498	0.00402886	Rejected	Enriched
O43678	NADH dehydrogenase [ubiquinone] 1 alpha subcomplex subunit 2 [OS=Homo sapiens]	1.34041	0.942	1.35967	10.5552	1	6.19145	0.0325316	0.00405893	Rejected	Enriched
Q96RS6	NudC domain-containing protein 1 [OS=Homo sapiens]	2.31918	0.937	2.50641	14.166	1	2.7106	0.0332231	0.004089	Rejected	Enriched
P23921	Ribonucleoside-diphosphate reductase large subunit [OS=Homo sapiens]	1.48863	0.932	1.57167	8.99058	1	2.873	0.0337643	0.00411906	Rejected	Enriched
P61758	Prefoldin subunit 3 [OS=Homo sapiens]	2.36677	0.931	2.42692	7.18348	1	2.82207	0.0339447	0.00414913	Rejected	Enriched
Q8IVT2	Mitotic interactor and substrate of PLK1 [OS=Homo sapiens]	1.81827	0.93	1.904	23320.9	1	11525.6	0.0341852	0.00417919	Rejected	Enriched
Q9Y2X3	Nucleolar protein 58 [OS=Homo sapiens]	3.54832	0.926	4.12279	11.4677	1	2.8947	0.0348166	0.00420926	Rejected	Enriched
O43747-2	Isoform 2 of AP-1 complex subunit gamma-1 [OS=Homo sapiens]	108.219	0.923	114.728	14.0126	1	5.23302	0.0356284	0.00423933	Rejected	Enriched
Q15003	Condensin complex subunit 2 [OS=Homo sapiens]	1.53249	0.921	1.6176	5.93434	1	2.4091	0.035899	0.00426939	Rejected	Enriched
Q7LG56-6	Isoform 6 of Ribonucleoside-diphosphate reductase subunit M2 B [OS=Homo sapiens]	7.25931	0.919	7.81051	69.5139	1	49.5502	0.0361696	0.00429946	Rejected	Enriched
O95816	BAG family molecular chaperone regulator 2 [OS=Homo sapiens]	5.50299	0.919	5.88216	61.2859	1	3.3391	0.0361996	0.00432952	Rejected	Enriched
P46977	Dolichyl-diphosphooligosaccharide--protein glycosyltransferase subunit STT3A [OS=Homo sapiens]	2.16794	0.908	2.27676	6.53654	1	2.49295	0.0378833	0.00435959	Rejected	Enriched
Q12959-2	Isoform 2 of Disks large homolog 1 [OS=Homo sapiens]	1.54786	0.908	1.66642	4.80298	1	3.49713	0.0379134	0.00438966	Rejected	Enriched
P27695	DNA-(apurinic or apyrimidinic site) lyase [OS=Homo sapiens]	5.61297	0.901	7.68594	6.98379	1	3.66134	0.0389056	0.00441972	Rejected	Enriched
Q9Y3B4	Splicing factor 3B subunit 6 [OS=Homo sapiens]	1.79561	0.9	2.14148	8.58998	1	2.7756	0.0390559	0.00444979	Rejected	Enriched
P11215-2	Isoform 2 of Integrin alpha-M [OS=Homo sapiens]	1.36867	0.898	1.50185	18.4193	1	15.4383	0.0392965	0.00447986	Rejected	Enriched
O14979-1	Heterogeneous nuclear ribonucleoprotein D-like [OS=Homo sapiens]	2.59451	0.888	3.82036	5.39557	1	2.60528	0.040018	0.00450992	Rejected	Enriched
Q5VYK3	Proteasome-associated protein ECM29 homolog [OS=Homo sapiens]	2.0535	0.883	2.55306	8.84764	1	3.20257	0.0407396	0.00453999	Rejected	Enriched
Q8WXA9-2	Isoform 2 of Splicing regulatory glutamine/lysine-rich protein 1 [OS=Homo sapiens]	5.45297	0.879	6.10208	58.3716	1	15.1114	0.0411305	0.00457005	Rejected	Enriched
P41252	isoleucine--tRNA ligase, cytoplasmic [OS=Homo sapiens]	39.1083	0.877	47.3717	13.7511	1	3.03652	0.0412207	0.00460012	Rejected	Enriched
Q86X51	Uncharacterized protein CXorf67 [OS=Homo sapiens]	22.2646	0.876	27.3734	898.733	1	2.36776	0.041371	0.00463019	Rejected	Enriched
Q9NR30-1	Nucleolar RNA helicase 2 [OS=Homo sapiens]	1.91453	0.868	2.24094	519.758	1	3.61823	0.0420926	0.00466025	Rejected	Enriched
Q9UH65	Switch-associated protein 70 [OS=Homo sapiens]	2.93469	0.867	3.28245	14.4204	1	3.46369	0.0422129	0.00469032	Rejected	Enriched
O00154	cytosolic acyl coenzyme A thioester hydrolase [OS=Homo sapiens]	8.07136	0.861	10.4004	136.815	1	15.3924	0.0428142	0.00472038	Rejected	Enriched
Q13442	28 kDa heat- and acid-stable phosphoprotein [OS=Homo sapiens]	1.62853	0.848	1.89206	43.2695	1	4.89349	0.0441672	0.00475045	Rejected	Enriched
Q9H6J7-2	Isoform 2 of UPF0705 protein C11orf49 [OS=Homo sapiens]	4.01945	0.828	4.54753	11.4123	1	2.70596	0.0461215	0.00478052	Rejected	Enriched
Q13724-1	Mannosyl-oligosaccharide glucosidase [OS=Homo sapiens]	3.42972	0.826	4.02807	17.9014	1	7.97553	0.0462417	0.00481058	Rejected	Enriched
Q9BUH6	Protein PAXX [OS=Homo sapiens]	1.1685	0.812	1.36238	1.39351	1	1.21853	0.0478954	0.00484065	Rejected	Enriched
Q13561-2	Isoform 2 of Dynactin subunit 2 [OS=Homo sapiens]	2.1695	0.81	3.54827	6.33756	1	2.93094	0.0480758	0.00487072	Rejected	Enriched
Q13257-1	Mitotic spindle assembly checkpoint protein MAD2A [OS=Homo sapiens]	1.2535	0.808	1.48479	10.9726	1	3.79566	0.0483163	0.00490078	Rejected	Enriched
P09496-2	Isoform Non-brain of Clathrin light chain A [OS=Homo sapiens]	1.38749	0.798	1.93666	11.2601	1	4.36503	0.0490078	0.00493085	Rejected	Enriched
Q8WYA6	Beta-catenin-like protein 1 [OS=Homo sapiens]	2.68028	0.784	3.60866	13.2213	1	2.76909	0.0503007	0.00496091	Rejected	Enriched
Q9NTK5-1	obg-like ATPase 1 [OS=Homo sapiens]	1.81671	0.774	3.61563	5.67915	1	2.71993	0.0513229	0.00499098	Rejected	Enriched
Q93008-3	Probable ubiquitin carboxyl-terminal hydrolase FAF-X [OS=Homo sapiens]	1.72955	0.739	3.2641	2.67233	1	1.92926	0.0536681	0.00502105	Rejected	Enriched
P62280	40S ribosomal protein S11 [OS=Homo sapiens]	1.15616	0.721	1.52371	28.9519	1	2.23817	0.0548106	0.00505111	Rejected	Enriched
O95747	Serine/threonine-protein kinase OSR1 [OS=Homo sapiens]	1.16883	0.693	1.62013	7.76168	1	2.58531	0.0564342	0.00508118	Rejected	Enriched
P46777	60S ribosomal protein L5 [OS=Homo sapiens]	1.18301	0.67	1.86393	4.76125	1	2.66359	0.0578473	0.00511124	Rejected	Enriched
P00441	Superoxide dismutase [Cu-Zn] [OS=Homo sapiens]	1.34179	0.576	3.29963	24.534	1	3.53817	0.0633794	0.00514131	Rejected	Enriched
P36405	ADP-ribosylation factor-like protein 3 [OS=Homo sapiens]	1.02275	0.559	1.4814	1.74127	1	1.44746	0.0642213	0.00517138	Rejected	Enriched
Q92538	Golgi-specific brefeldin A-resistance guanine nucleotide exchange factor 1 [OS=Homo sapiens]	1.01591	0.547	1.27265	35.104	1	5.48219	0.0649729	0.00520144	Rejected	Enriched
Q9UNN8	Endothelial protein C receptor [OS=Homo sapiens]	2.19674	0.535	3.48514	7.32206	1	2.61435	0.0656945	0.00523151	Rejected	Enriched
Q13098-7	Isoform 2 of COP9 signalosome complex subunit 1 [OS=Homo sapiens]	0.981584	0.489	1.43555	9.28905	1	3.64798	0.0682802	0.00526158	Rejected	Enriched
O00267	Transcription elongation factor Spt5 [OS=Homo sapiens]	0.901683	0.471	2.63836	8.7	1	4.62245	0.0691221	0.00529164	Rejected	Enriched
Q96EI5-2	Isoform 2 of Transcription elongation factor A protein-like 4 [OS=Homo sapiens]	0.960789	0.468	1.74752	73.1095	1	3.61341	0.0692423	0.00532171	Rejected	Enriched
Q4V328	GRIP1-associated protein 1 [OS=Homo sapiens]	0.783907	0.45	3.78945	55.0185	1	6.87108	0.0698737	0.00535177	Rejected	Enriched
Q14978-2	Isoform Beta of Nucleolar and coiled-body phosphoprotein 1 [OS=Homo sapiens]	0.945315	0.449	1.52788	39.26	1	4.30078	0.0699038	0.00538184	Rejected	Enriched
Q9HCS7	Pre-mRNA-splicing factor SYF1 [OS=Homo sapiens]	0.980537	0.438	1.43582	5.48116	1	2.8817	0.0703548	0.00541191	Rejected	Enriched
Q96CW1	AP-2 complex subunit mu [OS=Homo sapiens]	0.900231	0.432	2.02665	9.17565	1	5.57272	0.0706554	0.00544197	Rejected	Enriched
Q9NVI7	ATPase family AAA domain-containing protein 3A [OS=Homo sapiens]	0.894535	0.319	1.36038	14.5565	1	10.4271	0.0736019	0.00547204	Rejected	Enriched
Q14137	Ribosome biogenesis protein BOP1 [OS=Homo sapiens]	0.526877	0.292	2.67407	28.7271	1	7.71069	0.0743836	0.0055021	Rejected	Enriched
Q04206	Transcription factor p65 [OS=Homo sapiens]	0.859607	0.174	1.30735	45.7995	1	10.2494	0.0782622	0.00553217	Rejected	Enriched
Q9P121-4	Isoform 4 of Neurotrimin [OS=Homo sapiens]	0.461797	0.098	2.36472	20.8402	1	3.01213	0.0811786	0.00556224	Rejected	Enriched
P33992	DNA replication licensing factor mcm5 [OS=Homo sapiens]	0.663921	0.088	1.66383	10.4396	1	4.03795	0.0816597	0.0055923	Rejected	Enriched
Q9BY77	Polymerase delta-interacting protein 3 [OS=Homo sapiens]	0.632606	0.082	1.65271	4.29834	1	2.00321	0.0820505	0.00562237	Rejected	Enriched
Q14CX7-1	N-alpha-acetyltransferase 25, NatB auxiliary subunit [OS=Homo sapiens]	0.326183	0.012	2.28269	14.8989	1	3.15801	0.0850872	0.00565244	Rejected	Enriched
P35579-1	Myosin-9 [OS=Homo sapiens]	4.65525	1	2.2994	1.70038	0.999	1.41376	6.01323e-05	0.0056825	Enriched	Enriched
P08670	Vimentin [OS=Homo sapiens]	9.22557	1	2.69145	16.9148	0.999	11.2144	0.000511124	0.00571257	Enriched	Enriched
Q9Y2J2-2	Isoform 2 of Band 4.1-like protein 3 [OS=Homo sapiens]	1.68415	1	1.39142	1.96962	0.999	1.48198	0.00219483	0.00574263	Enriched	Enriched
P37802-2	Isoform 2 of Transgelin-2 [OS=Homo sapiens]	2.3894	1	1.60616	2.51742	0.999	2.15708	0.00294648	0.0057727	Enriched	Enriched
Q9UNF1	Melanoma-associated antigen D2 [OS=Homo sapiens]	15.4598	1	2.54603	11.2507	0.999	4.62723	0.00463019	0.00580277	Enriched	Enriched
Q15907	Ras-related protein Rab-11B [OS=Homo sapiens]	6.4668	1	2.47492	8.83489	0.999	2.88782	0.00709561	0.00583283	Enriched	Enriched
Q01081	Splicing factor U2AF 35 kDa subunit [OS=Homo sapiens]	10.4315	1	6.16227	4.49394	0.999	3.72551	0.00914011	0.0058629	Enriched	Enriched
Q7KZF4	staphylococcal nuclease domain-containing protein 1 [OS=Homo sapiens]	2.9227	0.999	2.154	3.85678	0.999	2.61653	0.0123572	0.00589296	Enriched	Enriched
P19367-3	Isoform 3 of Hexokinase-1 [OS=Homo sapiens]	7.71046	0.999	5.30884	2.16847	0.999	1.6325	0.0123873	0.00592303	Enriched	Enriched
Q96A33-1	Coiled-coil domain-containing protein 47 [OS=Homo sapiens]	20.602	0.999	10.2251	3.96794	0.999	2.09109	0.0131088	0.0059531	Enriched	Enriched
P12956	X-ray repair cross-complementing protein 6 [OS=Homo sapiens]	2.98253	0.996	1.98546	3.5516	0.999	2.49163	0.0158449	0.00598316	Enriched	Enriched
O94906-1	Pre-mRNA-processing factor 6 [OS=Homo sapiens]	6.21347	0.995	4.94498	23.2311	0.999	9.89441	0.016807	0.00601323	Enriched	Enriched
P47914	60S ribosomal protein L29 [OS=Homo sapiens]	2.45779	0.994	2.01767	3.7577	0.999	2.15602	0.0183103	0.0060433	Enriched	Enriched
Q9HDC9	Adipocyte plasma membrane-associated protein [OS=Homo sapiens]	6.9035	0.986	4.95146	38.0414	0.999	3.79608	0.0224895	0.00607336	Enriched	Enriched
Q86XR7-2	Isoform 2 of TIR domain-containing adapter molecule 2 [OS=Homo sapiens]	7.06197	0.986	4.67182	12.0864	0.999	4.54702	0.0225797	0.00610343	Enriched	Enriched
Q92552-2	Isoform 2 of 28S ribosomal protein S27, mitochondrial [OS=Homo sapiens]	2.56539	0.978	2.21884	13.4769	0.999	5.65698	0.0249549	0.00613349	Enriched	Enriched
O75396	Vesicle-trafficking protein SEC22b [OS=Homo sapiens]	1.94636	0.974	1.81795	4.12547	0.999	2.127	0.0260673	0.00616356	Rejected	Enriched
O75821	Eukaryotic translation initiation factor 3 subunit G [OS=Homo sapiens]	6.87734	0.959	6.53237	4.79143	0.999	2.34431	0.0296452	0.00619363	Rejected	Enriched
O95218-1	Zinc finger Ran-binding domain-containing protein 2 [OS=Homo sapiens]	1.74495	0.932	1.8436	29.8877	0.999	14.1636	0.0337342	0.00622369	Rejected	Enriched
P51398-1	28S ribosomal protein S29, mitochondrial [OS=Homo sapiens]	5.21174	0.907	5.49388	5.04193	0.999	3.41154	0.0381239	0.00625376	Rejected	Enriched
Q9H1B7	interferon regulatory factor 2-binding protein-like [OS=Homo sapiens]	2.50407	0.901	3.10175	10.6816	0.999	5.2244	0.0389657	0.00628382	Rejected	Enriched
P62861	40S ribosomal protein S30 [OS=Homo sapiens]	3.19737	0.897	3.84623	6.29664	0.999	2.97362	0.0393867	0.00631389	Rejected	Enriched
Q9UIA9	exportin-7 [OS=Homo sapiens]	2.4818	0.798	3.53744	5.59179	0.999	2.48949	0.0489477	0.00634396	Rejected	Enriched
Q96DB5	regulator of microtubule dynamics protein 1 [OS=Homo sapiens]	2.27193	0.754	2.9455	4.55716	0.999	3.62864	0.052736	0.00637402	Rejected	Enriched
O75146	Huntingtin-interacting protein 1-related protein [OS=Homo sapiens]	1.17181	0.75	1.45272	2.63962	0.999	1.82608	0.0530066	0.00640409	Rejected	Enriched
Q969Q0	60S ribosomal protein L36a-like [OS=Homo sapiens]	0.80033	0.245	1.59179	2.47664	0.999	1.91186	0.0761575	0.00643416	Rejected	Enriched
Q9UJZ1	Stomatin-like protein 2, mitochondrial [OS=Homo sapiens]	0.449038	0.162	3.21802	729.81	0.999	3.43364	0.0788334	0.00646422	Rejected	Enriched
Q9P013	spliceosome-associated protein CWC15 homolog [OS=Homo sapiens]	0.80814	0.159	1.42805	5.20907	0.999	3.93806	0.0790439	0.00649429	Rejected	Enriched
P54108-3	Isoform 3 of Cysteine-rich secretory protein 3 [OS=Homo sapiens]	0.555656	0.159	2.10163	32.7927	0.999	27.7062	0.079074	0.00652435	Rejected	Enriched
P07195	L-lactate dehydrogenase B chain [OS=Homo sapiens]	7.92444	1	2.09095	2.87992	0.998	1.94293	0.00126278	0.00655442	Enriched	Enriched
P05023	Sodium/potassium-transporting ATPase subunit alpha-1 [OS=Homo sapiens]	13.2208	1	2.49485	5.69337	0.998	3.8395	0.00150331	0.00658449	Enriched	Enriched
P23246-1	splicing factor, proline- and glutamine-rich [OS=Homo sapiens]	3.26445	1	1.92279	2.72451	0.998	1.8216	0.00159351	0.00661455	Enriched	Enriched
P30153	serine/threonine-protein phosphatase 2A 65 kDa regulatory subunit A alpha isoform [OS=Homo sapiens]	11.4145	1	4.53409	5.85641	0.998	3.00834	0.00222489	0.00664462	Enriched	Enriched
Q13283	Ras GTPase-activating protein-binding protein 1 [OS=Homo sapiens]	4.71463	1	2.26045	4.41747	0.998	2.54476	0.00405893	0.00667468	Enriched	Enriched
Q9P2J5	Leucine--tRNA ligase, cytoplasmic [OS=Homo sapiens]	5.41785	1	3.41327	4.42259	0.998	2.48445	0.00429946	0.00670475	Enriched	Enriched
Q6KB66	Keratin, type II cytoskeletal 80 [OS=Homo sapiens]	5.46689	1	2.41981	2.23413	0.998	1.71755	0.00625376	0.00673482	Enriched	Enriched
Q14116	Interleukin-18 [OS=Homo sapiens]	8.11609	1	2.86301	6.53948	0.998	2.51481	0.00742634	0.00676488	Enriched	Enriched
Q9UHR5-1	SAP30-binding protein [OS=Homo sapiens]	1.37037	1	1.23845	1.58239	0.998	1.38581	0.00938064	0.00679495	Enriched	Enriched
P54709	sodium/potassium-transporting ATPase subunit beta-3 [OS=Homo sapiens]	3.74005	1	2.94134	6.60446	0.998	4.39842	0.0102526	0.00682502	Enriched	Enriched
Q8N0X7	Spartin [OS=Homo sapiens]	15.3862	1	2.57866	9.0793	0.998	2.99585	0.0105232	0.00685508	Enriched	Enriched
Q9Y5V3-2	Isoform 2 of Melanoma-associated antigen D1 [OS=Homo sapiens]	6.59459	1	2.33434	5.16052	0.998	2.4679	0.0106735	0.00688515	Enriched	Enriched
P29034	protein S100-A2 [OS=Homo sapiens]	13.4902	1	5.45539	22.4141	0.998	11.7736	0.0113951	0.00691521	Enriched	Enriched
P55060-1	Exportin-2 [OS=Homo sapiens]	5.70103	0.996	2.66872	2.73367	0.998	1.90173	0.0157847	0.00694528	Enriched	Enriched
O00264	Membrane-associated progesterone receptor component 1 [OS=Homo sapiens]	2.82139	0.995	2.22568	7.58703	0.998	3.59925	0.0167769	0.00697535	Enriched	Enriched
P48556	26S proteasome non-ATPase regulatory subunit 8 [OS=Homo sapiens]	7.12555	0.995	4.75845	8.34754	0.998	4.19397	0.017288	0.00700541	Enriched	Enriched
O43491-1	band 4.1-like protein 2 [OS=Homo sapiens]	2.01022	0.994	1.71168	3.84512	0.998	2.39821	0.0175887	0.00703548	Enriched	Enriched
P13987	CD59 glycoprotein [OS=Homo sapiens]	6.30787	0.993	4.28609	4.94554	0.998	2.42118	0.0191822	0.00706554	Enriched	Enriched
Q9Y5S9	RNA-binding protein 8A [OS=Homo sapiens]	2.2659	0.99	2.14074	7.77079	0.998	3.74774	0.0207456	0.00709561	Enriched	Enriched
Q53FA7-1	Quinone oxidoreductase PIG3 [OS=Homo sapiens]	4.87171	0.99	4.15509	5.95375	0.998	3.02437	0.0208058	0.00712568	Enriched	Enriched
O14776-1	Transcription elongation regulator 1 [OS=Homo sapiens]	6.08151	0.989	3.21796	23.8485	0.998	5.34506	0.0210764	0.00715574	Enriched	Enriched
Q5JTH9-1	RRP12-like protein [OS=Homo sapiens]	5.54459	0.973	4.85662	3.54392	0.998	2.31723	0.0263079	0.00718581	Rejected	Enriched
Q6AI08	HEAT repeat-containing protein 6 [OS=Homo sapiens]	4.25129	0.963	3.96878	6.1128	0.998	2.69281	0.029074	0.00721587	Rejected	Enriched
Q8NBX0	saccharopine dehydrogenase-like oxidoreductase [OS=Homo sapiens]	2.48818	0.947	2.54088	2.52594	0.998	1.79679	0.0318701	0.00724594	Rejected	Enriched
P46782	40S ribosomal protein S5 [OS=Homo sapiens]	1.65133	0.92	1.7091	6.83607	0.998	4.48049	0.0360493	0.00727601	Rejected	Enriched
Q9Y4L1	Hypoxia up-regulated protein 1 [OS=Homo sapiens]	3.57287	0.912	4.08555	10.3412	0.998	3.9965	0.0373121	0.00730607	Rejected	Enriched
P40261	Nicotinamide N-methyltransferase [OS=Homo sapiens]	9.44707	0.909	12.7997	9.7714	0.998	5.91667	0.0376127	0.00733614	Rejected	Enriched
Q14764	major vault protein [OS=Homo sapiens]	14.9759	0.887	16.5162	4.27805	0.998	2.25136	0.0402886	0.00736621	Rejected	Enriched
P50991	T-complex protein 1 subunit delta [OS=Homo sapiens]	1.64168	0.882	1.82653	2.58161	0.998	1.86275	0.0407998	0.00739627	Rejected	Enriched
Q8WUX9	Charged multivesicular body protein 7 [OS=Homo sapiens]	1.26299	0.835	1.40723	1.37243	0.998	1.23885	0.0453999	0.00742634	Rejected	Enriched
P54619-3	Isoform 3 of 5'-AMP-activated protein kinase subunit gamma-1 [OS=Homo sapiens]	2.99904	0.832	3.77012	20.9215	0.998	4.58576	0.0457306	0.0074564	Rejected	Enriched
P09622	Dihydrolipoyl dehydrogenase, mitochondrial [OS=Homo sapiens]	2.83789	0.829	5.24223	6.13634	0.998	3.48937	0.0460313	0.00748647	Rejected	Enriched
Q13418	Integrin-linked protein kinase [OS=Homo sapiens]	1.19725	0.779	1.46694	2.41074	0.998	1.77378	0.0509321	0.00751654	Rejected	Enriched
P46779	60S ribosomal protein L28 [OS=Homo sapiens]	1.11075	0.641	1.57494	1.82844	0.998	1.43944	0.0594408	0.0075466	Rejected	Enriched
Q9Y3D9	28S ribosomal protein S23, mitochondrial [OS=Homo sapiens]	1.02215	0.555	1.39391	8.47266	0.998	3.02054	0.0644618	0.00757667	Rejected	Enriched
Q8IZL8	Proline-, glutamic acid- and leucine-rich protein 1 [OS=Homo sapiens]	0.988431	0.464	1.45007	18.7694	0.998	11.2349	0.0693626	0.00760673	Rejected	Enriched
Q9NRG9-1	Aladin [OS=Homo sapiens]	0.923167	0.319	1.26636	1.78231	0.998	1.46242	0.0737222	0.0076368	Rejected	Enriched
P57052	Splicing regulator RBM11 [OS=Homo sapiens]	0.860719	0.259	1.50659	3.14271	0.998	2.29885	0.0755562	0.00766687	Rejected	Enriched
P11586	C-1-tetrahydrofolate synthase, cytoplasmic [OS=Homo sapiens]	7.66342	1	3.74256	10.8846	0.997	5.92674	0.00144317	0.00769693	Enriched	Enriched
Q99832	T-complex protein 1 subunit eta [OS=Homo sapiens]	16.6383	1	3.65042	17.949	0.997	5.88269	0.00171377	0.007727	Enriched	Enriched
P27348	14-3-3 protein theta [OS=Homo sapiens]	11.8635	1	3.04074	4.90916	0.997	2.76686	0.00237523	0.00775707	Enriched	Enriched
P36578	60S ribosomal protein L4 [OS=Homo sapiens]	4.80546	1	2.49083	2.24797	0.997	1.72007	0.00285628	0.00778713	Enriched	Enriched
O43175	D-3-phosphoglycerate dehydrogenase [OS=Homo sapiens]	11.9864	1	2.71528	13.7341	0.997	4.11364	0.00357787	0.0078172	Enriched	Enriched
Q16222-1	UDP-N-acetylhexosamine pyrophosphorylase [OS=Homo sapiens]	16.0174	1	3.27375	8.70742	0.997	3.90276	0.00826819	0.00784726	Enriched	Enriched
P49257	Protein ERGIC-53 [OS=Homo sapiens]	3.07415	0.999	2.04749	5.71447	0.997	3.12968	0.0130487	0.00787733	Enriched	Enriched
Q9UBI6	guanine nucleotide-binding protein g(i)/g(s)/g(o) subunit gamma-12 [OS=Homo sapiens]	3.15995	0.997	2.57713	4.50415	0.997	2.44483	0.015454	0.0079074	Enriched	Enriched
Q6P1N9-1	Putative deoxyribonuclease TATDN1 [OS=Homo sapiens]	2.93187	0.989	2.13614	7.52407	0.997	3.02236	0.0212568	0.00793746	Enriched	Enriched
Q02952-1	A-kinase anchor protein 12 [OS=Homo sapiens]	2.76507	0.983	2.44284	4.81926	0.997	2.95646	0.0231209	0.00796753	Enriched	Enriched
Q9NXG2	THUMP domain-containing protein 1 [OS=Homo sapiens]	4.82574	0.974	3.8132	2.89019	0.997	2.46926	0.0261575	0.00799759	Rejected	Enriched
Q9NSE4	Isoleucine--tRNA ligase, mitochondrial [OS=Homo sapiens]	1.95944	0.938	2.00123	3.49951	0.997	2.53708	0.0329224	0.00802766	Rejected	Enriched
P11047	Laminin subunit gamma-1 [OS=Homo sapiens]	2.16293	0.887	2.30968	10.2867	0.997	6.99799	0.0403488	0.00805773	Rejected	Enriched
P63220	40S ribosomal protein S21 [OS=Homo sapiens]	2.51429	0.877	3.09906	2.70537	0.997	1.86613	0.0412808	0.00808779	Rejected	Enriched
P31150	Rab GDP dissociation inhibitor alpha [OS=Homo sapiens]	1.60083	0.802	2.60881	5.25083	0.997	2.74007	0.0485869	0.00811786	Rejected	Enriched
Q0ZGT2	Nexilin [OS=Homo sapiens]	1.6871	0.733	2.08094	7.75908	0.997	3.28895	0.0540589	0.00814793	Rejected	Enriched
Q9P0K7-2	Isoform 2 of Ankycorbin [OS=Homo sapiens]	1.43711	0.628	2.18914	3.98847	0.997	2.45249	0.060463	0.00817799	Rejected	Enriched
Q8IWS0-1	PHD finger protein 6 [OS=Homo sapiens]	1.54078	0.613	2.00398	4.18723	0.997	2.76649	0.0612147	0.00820806	Rejected	Enriched
Q99439	Calponin-2 [OS=Homo sapiens]	1.60769	0.58	3.58875	2.62793	0.997	2.14398	0.0631389	0.00823812	Rejected	Enriched
O00231-2	Isoform 2 of 26S proteasome non-ATPase regulatory subunit 11 [OS=Homo sapiens]	1.05806	0.563	1.80305	5.35661	0.997	2.71114	0.0639206	0.00826819	Rejected	Enriched
Q14204	Cytoplasmic dynein 1 heavy chain 1 [OS=Homo sapiens]	3.33514	1	1.91952	7.51384	0.996	5.39918	0.000270595	0.00829826	Enriched	Enriched
P12814-1	Alpha-actinin-1 [OS=Homo sapiens]	4.08228	1	2.09307	2.2893	0.996	1.83904	0.000300661	0.00832832	Enriched	Enriched
P61981	14-3-3 protein gamma [OS=Homo sapiens]	70.1239	1	16.2509	3.10518	0.996	2.04152	0.00321708	0.00835839	Enriched	Enriched
Q15021	condensin complex subunit 1 [OS=Homo sapiens]	27.6923	1	4.24963	3.99126	0.996	2.30784	0.00333734	0.00838845	Enriched	Enriched
P62191	26S proteasome regulatory subunit 4 [OS=Homo sapiens]	19.931	1	2.98288	3.73341	0.996	2.17767	0.0039988	0.00841852	Enriched	Enriched
P62910	60S ribosomal protein L32 [OS=Homo sapiens]	4.76805	1	2.7875	3.05437	0.996	2.04805	0.00874925	0.00844859	Enriched	Enriched
P25686-3	DnaJ homolog subfamily B member 2 [OS=Homo sapiens]	14.9998	1	2.994	1.76052	0.996	1.45098	0.0101624	0.00847865	Enriched	Enriched
Q12841	Follistatin-related protein 1 [OS=Homo sapiens]	3.35995	0.999	2.5024	19.7319	0.996	16.5436	0.013199	0.00850872	Enriched	Enriched
P49591	Serine--tRNA ligase, cytoplasmic [OS=Homo sapiens]	1.43565	0.995	1.30027	18.7979	0.996	2.93839	0.0168972	0.00853879	Enriched	Enriched
P10412	Histone H1.4 [OS=Homo sapiens]	6.82286	0.992	5.26546	10.6668	0.996	5.65818	0.019543	0.00856885	Enriched	Enriched
P84090	Enhancer of rudimentary homolog [OS=Homo sapiens]	14.4129	0.989	4.12888	6.21733	0.996	2.86977	0.0212267	0.00859892	Enriched	Enriched
O95372	acyl-protein thioesterase 2 [OS=Homo sapiens]	2.32057	0.989	2.05604	14.298	0.996	5.82512	0.0214672	0.00862898	Enriched	Enriched
O15226-2	Isoform 2 of NF-kappa-B-repressing factor [OS=Homo sapiens]	25.5975	0.988	22.0345	3.31073	0.996	2.26646	0.021798	0.00865905	Enriched	Enriched
P12277	Creatine kinase B-type [OS=Homo sapiens]	6.00803	0.987	4.61817	6.76595	0.996	4.69643	0.0220686	0.00868912	Enriched	Enriched
Q07812-2	Isoform Beta of Apoptosis regulator BAX [OS=Homo sapiens]	5.09715	0.981	4.62305	3.24054	0.996	2.05684	0.0239026	0.00871918	Enriched	Enriched
Q07960	rho GTPase-activating protein 1 [OS=Homo sapiens]	2.49921	0.978	2.12167	15.3853	0.996	9.7881	0.0248948	0.00874925	Enriched	Enriched
Q9Y263	Phospholipase A-2-activating protein [OS=Homo sapiens]	1.85598	0.974	1.67493	5.1029	0.996	2.64856	0.0259471	0.00877931	Rejected	Enriched
O76021	Ribosomal L1 domain-containing protein 1 [OS=Homo sapiens]	4.72677	0.942	4.85331	5.83109	0.996	3.13007	0.0325015	0.00880938	Rejected	Enriched
Q8WTT2	Nucleolar complex protein 3 homolog [OS=Homo sapiens]	1.49487	0.936	1.55655	3.14676	0.996	2.64986	0.0333434	0.00883945	Rejected	Enriched
O96011-1	Peroxisomal membrane protein 11B [OS=Homo sapiens]	1.36509	0.935	1.38836	4.4459	0.996	2.34227	0.0335839	0.00886951	Rejected	Enriched
Q14152	Eukaryotic translation initiation factor 3 subunit A [OS=Homo sapiens]	2.56683	0.905	2.87969	2.89408	0.996	2.20729	0.0383043	0.00889958	Rejected	Enriched
Q9BV86-1	N-terminal Xaa-Pro-Lys N-methyltransferase 1 [OS=Homo sapiens]	2.74179	0.899	2.99511	5.73783	0.996	4.93066	0.0391762	0.00892965	Rejected	Enriched
P52948-1	nuclear pore complex protein Nup98-Nup96 [OS=Homo sapiens]	3.66886	0.837	4.08486	5.34085	0.996	3.11716	0.0451594	0.00895971	Rejected	Enriched
Q8IZ83	Aldehyde dehydrogenase family 16 member A1 [OS=Homo sapiens]	8.2127	0.793	11.2299	6.72184	0.996	3.65922	0.0494588	0.00898978	Rejected	Enriched
O76031	ATP-dependent Clp protease ATP-binding subunit clpX-like, mitochondrial [OS=Homo sapiens]	1.13409	0.582	2.50169	5.24305	0.996	4.02519	0.0629284	0.00901984	Rejected	Enriched
O75381-1	Peroxisomal membrane protein PEX14 [OS=Homo sapiens]	1.02383	0.519	2.35729	5.10937	0.996	3.30678	0.066807	0.00904991	Rejected	Enriched
P60228	Eukaryotic translation initiation factor 3 subunit E [OS=Homo sapiens]	0.769827	0.159	1.50666	44.9326	0.996	4.52076	0.0790138	0.00907998	Rejected	Enriched
Q16850-1	lanosterol 14-alpha demethylase [OS=Homo sapiens]	0.553778	0.066	1.81738	48.2139	0.996	3.63445	0.0825616	0.00911004	Rejected	Enriched
P05556-1	Integrin beta-1 [OS=Homo sapiens]	6.43761	1	2.62719	1.9868	0.995	1.55837	0.00270595	0.00914011	Enriched	Enriched
O43143	Pre-mRNA-splicing factor ATP-dependent RNA helicase DHX15 [OS=Homo sapiens]	4.37803	1	2.61411	2.53587	0.995	1.83965	0.00447986	0.00917017	Enriched	Enriched
Q14444-1	Caprin-1 [OS=Homo sapiens]	8.60978	1	2.5291	7.11201	0.995	4.74257	0.00688515	0.00920024	Enriched	Enriched
Q9C0C9	(E3-independent) E2 ubiquitin-conjugating enzyme [OS=Homo sapiens]	9.93771	1	2.56413	7.17035	0.995	2.93424	0.00850872	0.00923031	Enriched	Enriched
P37108	Signal recognition particle 14 kDa protein [OS=Homo sapiens]	9.05742	1	5.90108	4.87662	0.995	3.17035	0.00944077	0.00926037	Enriched	Enriched
Q96N66-1	Lysophospholipid acyltransferase 7 [OS=Homo sapiens]	5.75131	1	2.34216	1.84601	0.995	1.55336	0.00971137	0.00929044	Enriched	Enriched
P11177	Pyruvate dehydrogenase E1 component subunit beta, mitochondrial [OS=Homo sapiens]	3.18044	0.999	2.16189	3.61421	0.995	2.26826	0.0125977	0.00932051	Enriched	Enriched
Q9NPD8	Ubiquitin-conjugating enzyme E2 T [OS=Homo sapiens]	5.89374	0.999	2.57669	5.96732	0.995	2.73524	0.0134396	0.00935057	Enriched	Enriched
P38117-2	Isoform 2 of Electron transfer flavoprotein subunit beta [OS=Homo sapiens]	9.64662	0.998	3.64303	4.24998	0.995	2.38499	0.0141912	0.00938064	Enriched	Enriched
Q9BV38	WD repeat-containing protein 18 [OS=Homo sapiens]	2.65539	0.995	1.94725	3.26824	0.995	2.71341	0.017258	0.0094107	Enriched	Enriched
Q96C19	EF-hand domain-containing protein D2 [OS=Homo sapiens]	2.39398	0.994	1.86874	2.28209	0.995	1.79663	0.0178894	0.00944077	Enriched	Enriched
P80404	4-aminobutyrate aminotransferase, mitochondrial [OS=Homo sapiens]	2.58411	0.989	2.27453	2.87509	0.995	2.62459	0.0214071	0.00947084	Enriched	Enriched
Q6Y7W6-1	GRB10-interacting GYF protein 2 [OS=Homo sapiens]	1.79453	0.982	1.60014	2.60697	0.995	1.92685	0.023632	0.0095009	Enriched	Enriched
Q04917	14-3-3 protein eta [OS=Homo sapiens]	5.92649	0.94	6.13387	3.33058	0.995	2.47416	0.0326518	0.00953097	Rejected	Enriched
O60884	DnaJ homolog subfamily A member 2 [OS=Homo sapiens]	1.43117	0.837	1.61573	5.3104	0.995	2.83799	0.0451894	0.00956103	Rejected	Enriched
P36543	V-type proton ATPase subunit E 1 [OS=Homo sapiens]	1.08049	0.547	2.26122	5.98619	0.995	3.55422	0.065003	0.0095911	Rejected	Enriched
P63096-1	Guanine nucleotide-binding protein G(i) subunit alpha-1 [OS=Homo sapiens]	0.95471	0.41	1.38341	36.2682	0.995	21.1056	0.0711966	0.00962117	Rejected	Enriched
P26440	Isovaleryl-CoA dehydrogenase, mitochondrial [OS=Homo sapiens]	0.927793	0.37	1.41171	2.36198	0.995	2.04317	0.0723091	0.00965123	Rejected	Enriched
Q96C86	M7GpppX diphosphatase [OS=Homo sapiens]	0.640379	0.048	1.58438	7.11206	0.995	3.17917	0.0832532	0.0096813	Rejected	Enriched
P08195	4F2 cell-surface antigen heavy chain [OS=Homo sapiens]	9.03835	1	2.07816	4.36388	0.994	3.55794	0.00354781	0.00971137	Enriched	Enriched
O95433	activator of 90 kDa heat shock protein ATPase homolog 1 [OS=Homo sapiens]	2.84859	1	1.92456	2.93854	0.994	1.99115	0.00511124	0.00974143	Enriched	Enriched
P05089	Arginase-1 [OS=Homo sapiens]	3.54637	1	2.00824	2.32152	0.994	1.74746	0.00727601	0.0097715	Enriched	Enriched
Q9H307	Pinin [OS=Homo sapiens]	2.30376	1	1.62074	3.57736	0.994	2.07803	0.00760673	0.00980156	Enriched	Enriched
P61086	Ubiquitin-conjugating enzyme E2 K [OS=Homo sapiens]	44.3798	1	4.53821	4.85503	0.994	3.31158	0.00895971	0.00983163	Enriched	Enriched
Q9HCY8	protein S100-A14 [OS=Homo sapiens]	3.72976	0.998	1.97157	2.69291	0.994	2.21884	0.0144919	0.0098617	Enriched	Enriched
P35232	Prohibitin [OS=Homo sapiens]	9.08956	0.994	7.39193	2.27528	0.994	1.88297	0.0176488	0.00989176	Enriched	Enriched
P30085-1	UMP-CMP kinase [OS=Homo sapiens]	9.4555	0.993	8.0559	13.282	0.994	4.19551	0.0188214	0.00992183	Enriched	Enriched
P46734-3	Isoform 2 of Dual specificity mitogen-activated protein kinase kinase 3 [OS=Homo sapiens]	1.68434	0.99	1.5287	3.08059	0.994	2.19916	0.0208358	0.00995189	Enriched	Enriched
O95251-1	Histone acetyltransferase KAT7 [OS=Homo sapiens]	4.11545	0.979	3.03429	151.636	0.994	14.9923	0.0246843	0.00998196	Enriched	Enriched
Q9HAV7	GrpE protein homolog 1, mitochondrial [OS=Homo sapiens]	3.60072	0.955	3.57467	10.5015	0.994	2.99299	0.0302465	0.010012	Rejected	Enriched
Q13642-4	Isoform 4 of Four and a half LIM domains protein 1 [OS=Homo sapiens]	11.3313	0.935	11.6473	7.07234	0.994	2.78619	0.0334336	0.0100421	Rejected	Enriched
P62847-4	Isoform 4 of 40S ribosomal protein S24 [OS=Homo sapiens]	13.9616	0.914	15.6551	5.18531	0.994	4.12076	0.0369814	0.0100722	Rejected	Enriched
P30101	Protein disulfide-isomerase A3 [OS=Homo sapiens]	1.58465	0.874	2.62128	3.01834	0.994	2.34261	0.0415815	0.0101022	Rejected	Enriched
Q96JB5-4	Isoform 4 of CDK5 regulatory subunit-associated protein 3 [OS=Homo sapiens]	1.37496	0.833	1.6487	2.63679	0.994	2.07779	0.0455803	0.0101323	Rejected	Enriched
P00846	ATP synthase subunit A [OS=Homo sapiens]	1.25466	0.83	1.47596	11.2615	0.994	5.14792	0.0459711	0.0101624	Rejected	Enriched
P04844-1	Dolichyl-diphosphooligosaccharide--protein glycosyltransferase subunit 2 [OS=Homo sapiens]	1.25619	0.72	1.84191	4.26497	0.994	2.54638	0.0549008	0.0101924	Rejected	Enriched
P19338	Nucleolin [OS=Homo sapiens]	1.42804	0.712	2.35458	3.38576	0.994	2.68716	0.0555322	0.0102225	Rejected	Enriched
O00291	Huntingtin-interacting protein 1 [OS=Homo sapiens]	1.85275	0.711	2.07287	13.5023	0.994	4.53187	0.0556825	0.0102526	Rejected	Enriched
Q9H4A3-7	Isoform 6 of Serine/threonine-protein kinase WNK1 [OS=Homo sapiens]	1.19265	0.701	1.61799	25.8204	0.994	8.22373	0.0561636	0.0102826	Rejected	Enriched
P09471-2	Isoform Alpha-2 of Guanine nucleotide-binding protein G(o) subunit alpha [OS=Homo sapiens]	1.11126	0.623	1.65302	2.77588	0.994	2.42883	0.0605833	0.0103127	Rejected	Enriched
P11216	Glycogen phosphorylase, brain form [OS=Homo sapiens]	3.14012	0.603	4.69863	5.31832	0.994	2.66006	0.061816	0.0103428	Rejected	Enriched
P84098	60S ribosomal protein L19 [OS=Homo sapiens]	1.19471	0.595	3.18509	3.75211	0.994	2.44848	0.062267	0.0103728	Rejected	Enriched
Q14690	Protein RRP5 homolog [OS=Homo sapiens]	0.422283	0.01	1.95813	42.5956	0.994	35.1813	0.0852075	0.0104029	Rejected	Enriched
P26038	Moesin [OS=Homo sapiens]	10.8323	1	5.62329	7.91802	0.993	5.08652	0.000721587	0.010433	Enriched	Enriched
P63000-2	Isoform B of Ras-related C3 botulinum toxin substrate 1 [OS=Homo sapiens]	19.5414	1	3.29943	3.85714	0.993	2.24548	0.0075466	0.010463	Enriched	Enriched
P50479-1	PDZ and LIM domain protein 4 [OS=Homo sapiens]	2.90047	1	1.85773	2.00614	0.993	1.76086	0.00775707	0.0104931	Enriched	Enriched
P05090	apolipoprotein D [OS=Homo sapiens]	11.0607	1	2.34507	15.2713	0.993	12.358	0.00778713	0.0105232	Enriched	Enriched
Q92820	Gamma-glutamyl hydrolase [OS=Homo sapiens]	4.5277	1	2.25117	2.76567	0.993	2.05193	0.00998196	0.0105532	Enriched	Enriched
O00330-1	Pyruvate dehydrogenase protein X component, mitochondrial [OS=Homo sapiens]	3.10682	0.999	1.90637	7.89848	0.993	2.86062	0.0134095	0.0105833	Enriched	Enriched
P08754	Guanine nucleotide-binding protein G(k) subunit alpha [OS=Homo sapiens]	16.2969	0.998	3.69068	4.12432	0.993	2.36514	0.0139808	0.0106133	Enriched	Enriched
Q9NYF8-1	Bcl-2-associated transcription factor 1 [OS=Homo sapiens]	5.51458	0.994	2.42445	8.02077	0.993	5.85743	0.0179194	0.0106434	Enriched	Enriched
Q96AC1-3	Isoform 3 of Fermitin family homolog 2 [OS=Homo sapiens]	10.9947	0.993	2.96707	7.17324	0.993	3.07753	0.0187613	0.0106735	Enriched	Enriched
O15397-1	Importin-8 [OS=Homo sapiens]	1.37898	0.968	1.33687	4.03045	0.993	2.85842	0.0279615	0.0107035	Rejected	Enriched
Q9P000-1	COMM domain-containing protein 9 [OS=Homo sapiens]	3.10111	0.955	3.02117	3.67596	0.993	2.19368	0.0303367	0.0107336	Rejected	Enriched
Q9NV06	DDB1- and CUL4-associated factor 13 [OS=Homo sapiens]	3.0046	0.945	3.03771	5.43774	0.993	2.8668	0.0322008	0.0107637	Rejected	Enriched
P24941-1	cyclin-dependent kinase 2 [OS=Homo sapiens]	5.43795	0.915	6.81955	3.77001	0.993	3.11535	0.0367108	0.0107937	Rejected	Enriched
Q15742-1	NGFI-A-binding protein 2 [OS=Homo sapiens]	2.06104	0.908	2.14531	2.62386	0.993	1.98935	0.0379735	0.0108238	Rejected	Enriched
Q9BVC6	Transmembrane protein 109 [OS=Homo sapiens]	1.82893	0.873	2.09084	4.07144	0.993	2.82893	0.0417017	0.0108539	Rejected	Enriched
O75153	Clustered mitochondria protein homolog [OS=Homo sapiens]	1.04313	0.592	1.31674	4.50705	0.993	2.58316	0.0624474	0.0108839	Rejected	Enriched
Q15427	Splicing factor 3b subunit 4 [OS=Homo sapiens]	0.902788	0.382	1.56508	1.9984	0.993	1.59564	0.0719483	0.010914	Rejected	Enriched
Q9H074	Polyadenylate-binding protein-interacting protein 1 [OS=Homo sapiens]	0.925203	0.175	1.12813	11.5348	0.993	3.03777	0.0782321	0.0109441	Rejected	Enriched
Q14376	UDP-glucose 4-epimerase [OS=Homo sapiens]	0.334631	0.022	2.58446	5.21923	0.993	3.58516	0.0846061	0.0109741	Rejected	Enriched
P57737-3	Isoform 3 of Coronin-7 [OS=Homo sapiens]	4.6718	1	2.69962	2.59444	0.992	1.99923	0.00962117	0.0110042	Enriched	Enriched
Q16831	uridine phosphorylase 1 [OS=Homo sapiens]	3.31739	0.999	2.84182	8.82114	0.992	4.12674	0.0133193	0.0110343	Enriched	Enriched
Q14974	Importin subunit beta-1 [OS=Homo sapiens]	6.59756	0.998	3.13793	3.04751	0.992	2.40814	0.01362	0.0110643	Enriched	Enriched
P04843	Dolichyl-diphosphooligosaccharide--protein glycosyltransferase subunit 1 [OS=Homo sapiens]	4.31886	0.987	3.26966	10.7007	0.992	7.92496	0.0219784	0.0110944	Enriched	Enriched
Q7L576-1	cytoplasmic FMR1-interacting protein 1 [OS=Homo sapiens]	14.6538	0.981	9.30235	7.60123	0.992	4.39658	0.0238124	0.0111245	Enriched	Enriched
O43818	U3 small nucleolar RNA-interacting protein 2 [OS=Homo sapiens]	9.45533	0.979	3.04833	4.52656	0.992	3.54921	0.024534	0.0111545	Enriched	Enriched
Q8TC12	Retinol dehydrogenase 11 [OS=Homo sapiens]	2.8334	0.966	2.6825	7.55662	0.992	2.52628	0.0284726	0.0111846	Rejected	Enriched
P15170-3	Isoform 3 of Eukaryotic peptide chain release factor GTP-binding subunit ERF3A [OS=Homo sapiens]	5.176	0.946	5.26036	7.19249	0.992	3.5131	0.0319603	0.0112147	Rejected	Enriched
Q13428-4	Isoform 4 of Treacle protein [OS=Homo sapiens]	3.05298	0.912	3.72056	3.14783	0.992	2.34582	0.037282	0.0112447	Rejected	Enriched
P04350	Tubulin beta-4A chain [OS=Homo sapiens]	3.23746	0.901	3.46737	15.0302	0.992	12.7364	0.0388755	0.0112748	Rejected	Enriched
Q68CZ2-1	Tensin-3 [OS=Homo sapiens]	1.36065	0.888	1.48442	5.52627	0.992	3.66601	0.0402586	0.0113049	Rejected	Enriched
Q02978	Mitochondrial 2-oxoglutarate/malate carrier protein [OS=Homo sapiens]	2.16586	0.707	2.87395	37.7208	0.992	11.1793	0.0558629	0.0113349	Rejected	Enriched
P43007-1	neutral amino acid transporter A [OS=Homo sapiens]	1.28093	0.61	1.75901	3.5876	0.992	2.43511	0.0614251	0.011365	Rejected	Enriched
Q9BXJ9	N-alpha-acetyltransferase 15, NatA auxiliary subunit [OS=Homo sapiens]	1.57114	0.53	4.11306	17.0252	0.992	11.1541	0.065905	0.0113951	Rejected	Enriched
P61960	Ubiquitin-fold modifier 1 [OS=Homo sapiens]	0.862012	0.348	2.07772	7.6113	0.992	4.7193	0.0729705	0.0114251	Rejected	Enriched
P62873	Guanine nucleotide-binding protein G(I)/G(S)/G(T) subunit beta-1 [OS=Homo sapiens]	0.425797	0.133	3.19181	4.251	0.992	2.84174	0.0799158	0.0114552	Rejected	Enriched
Q7Z434	Mitochondrial antiviral-signaling protein [OS=Homo sapiens]	0.849378	0.1	1.28966	2.64407	0.992	2.07057	0.0810283	0.0114853	Rejected	Enriched
Q9NZ01-1	Very-long-chain enoyl-CoA reductase [OS=Homo sapiens]	0.573078	0.03	1.63711	83.7915	0.992	42.6869	0.0840349	0.0115153	Rejected	Enriched
P50454	Serpin H1 [OS=Homo sapiens]	37.8214	1	5.71102	6.43738	0.991	2.62894	0.00339747	0.0115454	Enriched	Enriched
P62701	40S ribosomal protein S4, X isoform [OS=Homo sapiens]	6.02962	1	3.69758	3.47623	0.991	2.25893	0.00502105	0.0115755	Enriched	Enriched
Q14165	Malectin [OS=Homo sapiens]	22.4789	1	3.35245	8.32639	0.991	6.47378	0.00793746	0.0116055	Enriched	Enriched
Q9Y4C2-1	TRPM8 channel-associated factor 1 [OS=Homo sapiens]	60.8534	1	3.3869	11.5482	0.991	3.21423	0.0102826	0.0116356	Enriched	Enriched
Q96QA5	gasdermin-A [OS=Homo sapiens]	4.28916	1	1.99125	1.95991	0.991	1.58571	0.0103428	0.0116657	Enriched	Enriched
P22532	small proline-rich protein 2D [OS=Homo sapiens]	5.78108	1	3.33334	4.34406	0.991	2.81861	0.0110343	0.0116957	Enriched	Enriched
Q99497	protein DJ-1 [OS=Homo sapiens]	4.10043	0.997	3.2368	4.13108	0.991	2.43387	0.0149729	0.0117258	Enriched	Enriched
Q27J81	Inverted formin-2 [OS=Homo sapiens]	2.43085	0.951	2.42376	8.0783	0.991	6.86142	0.0308779	0.0117559	Rejected	Enriched
P49773	Histidine triad nucleotide-binding protein 1 [OS=Homo sapiens]	5.81526	0.95	5.81682	2.97794	0.991	2.12169	0.0311485	0.0117859	Rejected	Enriched
Q9ULH1-2	Isoform 1 of Arf-GAP with SH3 domain, ANK repeat and PH domain-containing protein 1 [OS=Homo sapiens]	5.52892	0.915	6.0385	6.19941	0.991	3.10137	0.0367709	0.011816	Rejected	Enriched
O95861-1	3'(2'),5'-bisphosphate nucleotidase 1 [OS=Homo sapiens]	3.30435	0.903	3.5434	2.13862	0.991	1.85488	0.0386049	0.0118461	Rejected	Enriched
Q7Z4S6-4	Isoform 4 of Kinesin-like protein KIF21A [OS=Homo sapiens]	1.17519	0.791	1.35351	1.55355	0.991	1.36393	0.0495791	0.0118761	Rejected	Enriched
Q99714-1	3-hydroxyacyl-CoA dehydrogenase type-2 [OS=Homo sapiens]	1.68677	0.741	3.04126	11.2184	0.991	5.2326	0.0535478	0.0119062	Rejected	Enriched
Q9BY67-3	Isoform 3 of Cell adhesion molecule 1 [OS=Homo sapiens]	1.12505	0.7	1.41813	5.30806	0.991	4.58826	0.0562237	0.0119363	Rejected	Enriched
Q52LJ0-2	Isoform 2 of Protein FAM98B [OS=Homo sapiens]	1.06306	0.614	1.46963	13.2382	0.991	3.49138	0.0610643	0.0119663	Rejected	Enriched
Q9UBU9-1	nuclear RNA export factor 1 [OS=Homo sapiens]	3.65662	0.561	6.97379	7.19479	0.991	5.99659	0.0641311	0.0119964	Rejected	Enriched
O43809	Cleavage and polyadenylation specificity factor subunit 5 [OS=Homo sapiens]	20.6263	0.525	27.7843	11.5445	0.991	3.72782	0.066386	0.0120265	Rejected	Enriched
Q7L014	probable ATP-dependent RNA helicase DDX46 [OS=Homo sapiens]	0.256382	0.178	4.42711	10.9671	0.991	7.39053	0.0781419	0.0120565	Rejected	Enriched
P12955	xaa-Pro dipeptidase [OS=Homo sapiens]	5.37576	1	3.06014	2.23876	0.99	1.82005	0.0076368	0.0120866	Enriched	Enriched
Q96ME7	Zinc finger protein 512 [OS=Homo sapiens]	4.00736	1	2.24488	2.94443	0.99	2.32982	0.0105532	0.0121167	Enriched	Enriched
Q9Y3F4-2	Isoform 2 of Serine-threonine kinase receptor-associated protein [OS=Homo sapiens]	1.80189	0.996	1.51825	3.09784	0.99	2.29832	0.015905	0.0121467	Enriched	Enriched
P04632	Calpain small subunit 1 [OS=Homo sapiens]	6.68504	0.991	3.61653	3.53122	0.99	2.88279	0.0202646	0.0121768	Enriched	Enriched
Q15029	116 kDa U5 small nuclear ribonucleoprotein component [OS=Homo sapiens]	1.93929	0.925	2.048	4.46157	0.99	3.21193	0.0349669	0.0122069	Rejected	Enriched
Q8NF37	Lysophosphatidylcholine acyltransferase 1 [OS=Homo sapiens]	2.42322	0.916	2.692	38.1113	0.99	15.2845	0.0366506	0.0122369	Rejected	Enriched
O94915-1	protein furry homolog-like [OS=Homo sapiens]	1.88543	0.914	2.2487	6.8603	0.99	3.21811	0.0370114	0.012267	Rejected	Enriched
Q5T0N5-1	Formin-binding protein 1-like [OS=Homo sapiens]	1.15497	0.853	1.24395	4.85686	0.99	3.91965	0.0437763	0.0122971	Rejected	Enriched
Q9Y678	Coatomer subunit gamma-1 [OS=Homo sapiens]	2.02845	0.848	2.67494	8.08379	0.99	5.49868	0.0441371	0.0123271	Rejected	Enriched
P53582	Methionine aminopeptidase 1 [OS=Homo sapiens]	1.37319	0.648	3.71181	5.23203	0.99	3.00247	0.0589898	0.0123572	Rejected	Enriched
Q13596	Sorting nexin-1 [OS=Homo sapiens]	3.25314	0.533	7.38947	3.98391	0.99	2.52233	0.0657847	0.0123873	Rejected	Enriched
P25685	dnaJ homolog subfamily B member 1 [OS=Homo sapiens]	0.988185	0.496	1.75279	219.127	0.99	205.331	0.0679194	0.0124173	Rejected	Enriched
P67775	Serine/threonine-protein phosphatase 2A catalytic subunit alpha isoform [OS=Homo sapiens]	0.564999	0.152	2.97429	4.02391	0.99	2.59373	0.0792844	0.0124474	Rejected	Enriched
P11413-2	Isoform Long of Glucose-6-phosphate 1-dehydrogenase [OS=Homo sapiens]	8.8285	1	3.15915	2.6187	0.989	2.14033	0.00210463	0.0124775	Enriched	Enriched
P12268	inosine-5'-monophosphate dehydrogenase 2 [OS=Homo sapiens]	14.4681	1	3.76133	8.58748	0.989	4.52663	0.0021347	0.0125075	Enriched	Enriched
P62241	40S ribosomal protein S8 [OS=Homo sapiens]	10.6769	1	3.2504	13.301	0.989	9.33137	0.00628382	0.0125376	Enriched	Enriched
O60749	Sorting nexin-2 [OS=Homo sapiens]	13.7363	0.998	4.40234	5.70884	0.989	4.47395	0.014101	0.0125676	Enriched	Enriched
P53602	Diphosphomevalonate decarboxylase [OS=Homo sapiens]	7.04793	0.994	3.0507	2.83885	0.989	2.07601	0.0182502	0.0125977	Enriched	Enriched
P23193	Transcription elongation factor A protein 1 [OS=Homo sapiens]	5.8683	0.992	4.44897	5.72314	0.989	4.79527	0.0197234	0.0126278	Enriched	Enriched
P61289-2	Isoform 2 of Proteasome activator complex subunit 3 [OS=Homo sapiens]	6.06058	0.973	4.56673	7.4524	0.989	3.69487	0.0263981	0.0126578	Rejected	Enriched
Q9BUJ2-1	Heterogeneous nuclear ribonucleoprotein U-like protein 1 [OS=Homo sapiens]	1.78839	0.924	2.00076	2.17703	0.989	1.7464	0.0352676	0.0126879	Rejected	Enriched
Q9NX40	OCIA domain-containing protein 1 [OS=Homo sapiens]	3.34118	0.855	4.23019	7.02325	0.989	5.29672	0.0434456	0.012718	Rejected	Enriched
Q9Y2W2	WW domain-binding protein 11 [OS=Homo sapiens]	2.28463	0.832	2.64485	10.0333	0.989	7.02278	0.0456103	0.012748	Rejected	Enriched
Q00839	Heterogeneous nuclear ribonucleoprotein U [OS=Homo sapiens]	1.11809	0.706	1.36573	2.03118	0.989	1.7731	0.055893	0.0127781	Rejected	Enriched
P63173	60s ribosomal protein l38 [OS=Homo sapiens]	3.34892	0.621	4.3139	4.99856	0.989	2.66708	0.0607637	0.0128082	Rejected	Enriched
O60841	Eukaryotic translation initiation factor 5B [OS=Homo sapiens]	1.11009	0.483	2.71591	105.879	0.989	70.5815	0.0685207	0.0128382	Rejected	Enriched
P61201-1	COP9 signalosome complex subunit 2 [OS=Homo sapiens]	0.954162	0.451	1.45915	25.4756	0.989	4.11619	0.0698437	0.0128683	Rejected	Enriched
Q14914	Prostaglandin reductase 1 [OS=Homo sapiens]	0.818694	0.128	1.37085	3.45835	0.989	2.60202	0.0801263	0.0128984	Rejected	Enriched
P53618	Coatomer subunit beta [OS=Homo sapiens]	10.2516	1	2.75119	2.07995	0.988	1.94066	0.00318701	0.0129284	Enriched	Enriched
P00491	purine nucleoside phosphorylase [OS=Homo sapiens]	3.91645	0.997	2.95697	5.98924	0.988	4.77812	0.0150331	0.0129585	Enriched	Enriched
P40939	Trifunctional enzyme subunit alpha, mitochondrial [OS=Homo sapiens]	3.48376	0.995	2.64385	6.49486	0.988	5.18873	0.0165965	0.0129886	Enriched	Enriched
Q13523	Serine/threonine-protein kinase PRP4 homolog [OS=Homo sapiens]	25.393	0.981	4.19493	10.7197	0.988	6.30834	0.024113	0.0130186	Enriched	Enriched
Q7Z4V5	Hepatoma-derived growth factor-related protein 2 [OS=Homo sapiens]	6.62774	0.964	6.27094	10.3836	0.988	7.99332	0.0288936	0.0130487	Rejected	Enriched
Q9Y3P9	Rab GTPase-activating protein 1 [OS=Homo sapiens]	1.97787	0.918	2.02073	10.4986	0.988	9.43577	0.0364702	0.0130788	Rejected	Enriched
Q9BRX2	Protein pelota homolog [OS=Homo sapiens]	1.39378	0.91	1.46913	13.8972	0.988	10.0299	0.0375225	0.0131088	Rejected	Enriched
Q96PK6-1	RNA-binding protein 14 [OS=Homo sapiens]	102.366	0.909	117.733	19.1816	0.988	11.5785	0.0376428	0.0131389	Rejected	Enriched
P09661	U2 small nuclear ribonucleoprotein A' [OS=Homo sapiens]	2.00899	0.901	2.12724	13.9229	0.988	12.8599	0.0389958	0.013169	Rejected	Enriched
P61225	ras-related protein Rap-2b [OS=Homo sapiens]	1.23482	0.882	1.33283	11.8306	0.988	9.66176	0.04092	0.013199	Rejected	Enriched
Q9Y2P8	RNA 3'-terminal phosphate cyclase-like protein [OS=Homo sapiens]	0.916592	0.307	1.32109	12.9235	0.988	11.3309	0.0739327	0.0132291	Rejected	Enriched
P46736	Lys-63-specific deubiquitinase BRCC36 [OS=Homo sapiens]	0.819273	0.211	1.40154	1.58268	0.988	1.45237	0.0773001	0.0132592	Rejected	Enriched
P49207	60S ribosomal protein L34 [OS=Homo sapiens]	8.76383	1	5.51523	3.24744	0.987	2.84091	0.0110042	0.0132892	Enriched	Enriched
O14531	dihydropyrimidinase-related protein 4 [OS=Homo sapiens]	7.03379	1	2.38251	6.93139	0.987	2.66492	0.0122369	0.0133193	Enriched	Enriched
P18754-2	Isoform 2 of Regulator of chromosome condensation [OS=Homo sapiens]	6.33094	0.979	5.8116	12.3693	0.987	6.39103	0.0244438	0.0133494	Enriched	Enriched
O75436-1	Vacuolar protein sorting-associated protein 26A [OS=Homo sapiens]	8.3767	0.967	7.62571	4.96411	0.987	3.2153	0.0282622	0.0133794	Rejected	Enriched
Q96CV9-1	Optineurin [OS=Homo sapiens]	0.79402	0.166	1.44932	1.82525	0.987	1.58301	0.0785929	0.0134095	Rejected	Enriched
Q9Y618-1	Nuclear receptor corepressor 2 [OS=Homo sapiens]	0.708587	0.03	1.3228	2.70577	0.987	2.30445	0.084095	0.0134396	Rejected	Enriched
P83731	60S ribosomal protein L24 [OS=Homo sapiens]	2.07916	0.999	1.51075	4.85227	0.986	4.46647	0.0128382	0.0134696	Enriched	Rejected
P07814	Bifunctional glutamate/proline--tRNA ligase [OS=Homo sapiens]	4.49301	0.998	3.31731	2.8743	0.986	2.37656	0.0135899	0.0134997	Enriched	Rejected
P09525	annexin A4 [OS=Homo sapiens]	6.9674	0.998	4.02688	2.23865	0.986	1.86878	0.0139206	0.0135298	Enriched	Rejected
P62851	40S ribosomal protein S25 [OS=Homo sapiens]	1.68351	0.992	1.50615	4.00069	0.986	3.39651	0.019994	0.0135598	Enriched	Rejected
P20073-1	Annexin A7 [OS=Homo sapiens]	5.69618	0.982	3.98537	3.69142	0.986	2.95279	0.0234817	0.0135899	Enriched	Rejected
Q15942	Zyxin [OS=Homo sapiens]	2.12196	0.947	2.15535	3.83271	0.986	2.4516	0.0317198	0.01362	Rejected	Rejected
Q9NVD7	alpha-parvin [OS=Homo sapiens]	4.72892	0.947	4.74936	13.5081	0.986	10.9622	0.0317799	0.01365	Rejected	Rejected
Q9BTU6	Phosphatidylinositol 4-kinase type 2-alpha [OS=Homo sapiens]	2.5891	0.825	3.08899	8.30541	0.986	3.9699	0.0464522	0.0136801	Rejected	Rejected
Q9HD42-1	Charged multivesicular body protein 1a [OS=Homo sapiens]	1.08575	0.57	1.48822	1.6474	0.986	1.50413	0.06365	0.0137102	Rejected	Rejected
Q9H2P0	Activity-dependent neuroprotector homeobox protein [OS=Homo sapiens]	1.06069	0.527	1.72494	20.0743	0.986	17.3925	0.0662057	0.0137402	Rejected	Rejected
Q12789-2	General transcription factor 3C polypeptide 1 [OS=Homo sapiens]	0.983597	0.457	1.30391	1.50568	0.986	1.40393	0.0696633	0.0137703	Rejected	Rejected
O60869-1	Endothelial differentiation-related factor 1 [OS=Homo sapiens]	2.91979	1	1.71166	2.44983	0.985	1.98504	0.010433	0.0138004	Enriched	Rejected
Q8WVV4-1	Isoform 1 of Protein POF1B [OS=Homo sapiens]	4.87887	1	2.41575	2.32404	0.985	1.95542	0.0111545	0.0138304	Enriched	Rejected
Q9Y547	Intraflagellar transport protein 25 homolog [OS=Homo sapiens]	4.94798	0.995	2.79957	2.68519	0.985	1.93263	0.0173782	0.0138605	Enriched	Rejected
P14866	Heterogeneous nuclear ribonucleoprotein L [OS=Homo sapiens]	4.31481	0.967	3.54404	4.57358	0.985	3.65219	0.0280818	0.0138906	Rejected	Rejected
P62857	40S ribosomal protein S28 [OS=Homo sapiens]	2.27526	0.956	2.1895	2.53997	0.985	2.14587	0.0300962	0.0139206	Rejected	Rejected
Q8WXI9	Transcriptional repressor p66-beta [OS=Homo sapiens]	3.35351	0.878	3.62385	98.1957	0.985	31.3602	0.0411906	0.0139507	Rejected	Rejected
O75152	Zinc finger CCCH domain-containing protein 11A [OS=Homo sapiens]	1.72687	0.632	3.76919	3.32094	0.985	2.61966	0.0601323	0.0139808	Rejected	Rejected
Q8NE71-1	ATP-binding cassette sub-family F member 1 [OS=Homo sapiens]	4.28642	0.95	4.27354	3.3643	0.984	2.37213	0.0310884	0.0140108	Rejected	Rejected
P27694	Replication protein A 70 kDa DNA-binding subunit [OS=Homo sapiens]	5.75042	0.937	5.87808	4.47823	0.984	3.53695	0.0331329	0.0140409	Rejected	Rejected
Q2M389	WASH complex subunit 4 [OS=Homo sapiens]	1.93109	0.905	2.21813	5.56579	0.984	3.13741	0.0384245	0.014071	Rejected	Rejected
Q9Y3E5	Peptidyl-tRNA hydrolase 2, mitochondrial [OS=Homo sapiens]	3.31198	0.885	4.47096	4.37595	0.984	4.2378	0.0405292	0.014101	Rejected	Rejected
Q9BY42	protein RTF2 homolog [OS=Homo sapiens]	1.34097	0.817	1.64412	1.43	0.984	1.32925	0.0475045	0.0141311	Rejected	Rejected
O00161	Synaptosomal-associated protein 23 [OS=Homo sapiens]	1.65234	0.787	2.44271	5.58566	0.984	3.1446	0.0500601	0.0141612	Rejected	Rejected
Q13045-1	protein flightless-1 homolog [OS=Homo sapiens]	1.22443	0.666	2.22866	15.6039	0.984	4.16981	0.0579976	0.0141912	Rejected	Rejected
O75934	Pre-mRNA-splicing factor spf27 [OS=Homo sapiens]	34.6238	0.642	51.9648	8.32096	0.984	2.94288	0.0593806	0.0142213	Rejected	Rejected
Q8WUM4	Programmed cell death 6-interacting protein [OS=Homo sapiens]	20.4045	1	10.8547	4.21694	0.983	3.38261	0.00291642	0.0142514	Enriched	Rejected
P23526-1	Adenosylhomocysteinase [OS=Homo sapiens]	4.76083	1	2.1178	3.93724	0.983	3.69195	0.00369814	0.0142814	Enriched	Rejected
Q99613	Eukaryotic translation initiation factor 3 subunit C [OS=Homo sapiens]	6.80077	1	2.37726	3.28566	0.983	2.72805	0.00411906	0.0143115	Enriched	Rejected
P08708	40S ribosomal protein S17 [OS=Homo sapiens]	6.82213	0.992	4.81879	5.71116	0.983	4.80059	0.0196332	0.0143416	Enriched	Rejected
Q92572	AP-3 complex subunit sigma-1 [OS=Homo sapiens]	2.28462	0.978	2.15875	1.78952	0.983	1.52123	0.025015	0.0143716	Enriched	Rejected
P02765	Alpha-2-HS-glycoprotein [OS=Homo sapiens]	2.15017	0.975	1.90705	10.4234	0.983	4.50279	0.0257667	0.0144017	Enriched	Rejected
P51665	26S proteasome non-ATPase regulatory subunit 7 [OS=Homo sapiens]	2.82429	0.974	2.44142	2.56594	0.983	2.09949	0.0259771	0.0144317	Rejected	Rejected
P43121	Cell surface glycoprotein MUC18 [OS=Homo sapiens]	2.57654	0.95	2.57673	4.42589	0.983	3.01448	0.0311786	0.0144618	Rejected	Rejected
P62269	40S ribosomal protein S18 [OS=Homo sapiens]	5.1571	0.937	5.34465	6.61098	0.983	4.52226	0.033163	0.0144919	Rejected	Rejected
Q9BZD4	kinetochore protein nuf2 [OS=Homo sapiens]	1.60733	0.936	1.71819	23.7509	0.983	18.7429	0.0333734	0.0145219	Rejected	Rejected
Q15020	Squamous cell carcinoma antigen recognized by T-cells 3 [OS=Homo sapiens]	1.15986	0.851	1.27723	2.4835	0.983	2.19818	0.0439868	0.014552	Rejected	Rejected
Q8IXT5	RNA-binding protein 12B [OS=Homo sapiens]	2.09458	0.774	2.58861	2.63177	0.983	2.18806	0.0514432	0.0145821	Rejected	Rejected
Q9BX68	Histidine triad nucleotide-binding protein 2, mitochondrial [OS=Homo sapiens]	1.49074	0.746	1.79165	6.10457	0.983	2.23974	0.0533373	0.0146121	Rejected	Rejected
Q9NXV6	CDKN2A-interacting protein [OS=Homo sapiens]	0.741125	0.096	1.49428	1.28469	0.983	1.23541	0.0813289	0.0146422	Rejected	Rejected
P41214	Eukaryotic translation initiation factor 2d [OS=Homo sapiens]	0.723875	0.047	1.3702	8.55346	0.983	3.89621	0.0833434	0.0146723	Rejected	Rejected
P08133-1	annexin A6 [OS=Homo sapiens]	4.4691	1	2.74412	5.32444	0.982	3.28892	0.00123271	0.0147023	Enriched	Rejected
Q9H845	Acyl-CoA dehydrogenase family member 9, mitochondrial [OS=Homo sapiens]	30.6886	1	6.33179	9.31442	0.982	3.51429	0.00583283	0.0147324	Enriched	Rejected
P29317	Ephrin type-A receptor 2 [OS=Homo sapiens]	9.4761	1	3.12908	8.46169	0.982	4.1341	0.00856885	0.0147625	Enriched	Rejected
P17050	alpha-N-acetylgalactosaminidase [OS=Homo sapiens]	2.99173	1	2.24629	19.4482	0.982	15.4148	0.0114853	0.0147925	Enriched	Rejected
P35998	26S proteasome regulatory subunit 7 [OS=Homo sapiens]	3.74034	0.999	2.21119	2.38267	0.982	1.96853	0.0125075	0.0148226	Enriched	Rejected
Q13404-1	Isoform 1 of Ubiquitin-conjugating enzyme E2 variant 1 [OS=Homo sapiens]	5.04813	0.999	2.87717	5.82191	0.982	4.11409	0.0130186	0.0148527	Enriched	Rejected
P06576	ATP synthase subunit beta, mitochondrial [OS=Homo sapiens]	5.17879	0.998	2.9217	4.86603	0.982	3.35271	0.01365	0.0148827	Enriched	Rejected
Q9BQS8-4	Isoform 4 of FYVE and coiled-coil domain-containing protein 1 [OS=Homo sapiens]	13.1762	0.998	3.26597	6.64076	0.982	3.10905	0.0146121	0.0149128	Enriched	Rejected
P20337	Ras-related protein Rab-3B [OS=Homo sapiens]	5.76872	0.994	2.87466	2.93626	0.982	2.46335	0.01816	0.0149429	Enriched	Rejected
Q5JVF3-4	Isoform 4 of PCI domain-containing protein 2 [OS=Homo sapiens]	2.08152	0.986	1.91805	23.5076	0.982	14.867	0.0225496	0.0149729	Enriched	Rejected
Q9NVP1	ATP-dependent RNA helicase DDX18 [OS=Homo sapiens]	1.68156	0.87	1.92778	2.74077	0.982	2.35527	0.0419723	0.015003	Rejected	Rejected
O75390	citrate synthase, mitochondrial [OS=Homo sapiens]	10.6746	0.858	13.0392	6.30905	0.982	3.25041	0.0430848	0.0150331	Rejected	Rejected
O43396	Thioredoxin-like protein 1 [OS=Homo sapiens]	2.56381	0.836	3.18705	12.9278	0.982	7.82789	0.0452796	0.0150631	Rejected	Rejected
Q09161	Nuclear cap-binding protein subunit 1 [OS=Homo sapiens]	2.62309	0.81	5.34491	6.85016	0.982	5.98238	0.048166	0.0150932	Rejected	Rejected
O95159	Zinc finger protein-like 1 [OS=Homo sapiens]	1.23333	0.566	2.3628	1.88186	0.982	1.71364	0.0638304	0.0151233	Rejected	Rejected
Q13310-3	Isoform 3 of Polyadenylate-binding protein 4 [OS=Homo sapiens]	0.625869	0.16	2.33275	4.12193	0.982	2.79355	0.0788936	0.0151533	Rejected	Rejected
Q96IU4	Protein ABHD14B [OS=Homo sapiens]	0.21304	0.027	2.75645	6.45309	0.982	4.87018	0.0842754	0.0151834	Rejected	Rejected
Q15393-1	Splicing factor 3B subunit 3 [OS=Homo sapiens]	18.4234	1	3.06915	3.69629	0.981	3.27598	0.00189417	0.0152135	Enriched	Rejected
P17858-1	ATP-dependent 6-phosphofructokinase, liver type [OS=Homo sapiens]	2.96099	1	1.87843	3.6861	0.981	3.04259	0.00493085	0.0152435	Enriched	Rejected
P17900	Ganglioside GM2 activator [OS=Homo sapiens]	5.53298	0.971	4.3958	4.31481	0.981	3.17977	0.0274203	0.0152736	Rejected	Rejected
P33176	Kinesin-1 heavy chain [OS=Homo sapiens]	1.88924	0.959	1.84975	4.89639	0.981	4.09496	0.029555	0.0153037	Rejected	Rejected
Q9BRP8	Partner of Y14 and mago [OS=Homo sapiens]	2.45396	0.92	2.50682	3.92511	0.981	2.10413	0.0360794	0.0153337	Rejected	Rejected
Q04446	1,4-alpha-glucan-branching enzyme [OS=Homo sapiens]	1.28905	0.821	1.64368	1.67262	0.981	1.48983	0.0468431	0.0153638	Rejected	Rejected
O95302-3	Isoform 3 of Peptidyl-prolyl cis-trans isomerase FKBP9 [OS=Homo sapiens]	1.05845	0.582	1.49286	3.84926	0.981	3.64014	0.0630487	0.0153939	Rejected	Rejected
Q9GZL7	ribosome biogenesis protein WDR12 [OS=Homo sapiens]	1.94217	0.516	2.99628	35.8688	0.981	31.4346	0.0669573	0.0154239	Rejected	Rejected
L0R6Q1	SLC35A4 upstream open reading frame protein [OS=Homo sapiens]	0.968825	0.467	1.63785	11.5752	0.981	4.40049	0.0692724	0.015454	Rejected	Rejected
Q96ER3	protein saal1 [OS=Homo sapiens]	0.589712	0.027	1.63232	4.64931	0.981	3.26252	0.0843355	0.0154841	Rejected	Rejected
P04406-1	glyceraldehyde-3-phosphate dehydrogenase [OS=Homo sapiens]	5.28609	1	2.0776	2.01984	0.98	1.73987	0.000601323	0.0155141	Enriched	Rejected
Q9UHD9	Ubiquilin-2 [OS=Homo sapiens]	12.1478	1	2.67868	7.11062	0.98	2.63578	0.00820806	0.0155442	Enriched	Rejected
Q15758-1	Neutral amino acid transporter B(0) [OS=Homo sapiens]	11.8762	0.998	8.94613	9.55851	0.98	3.77298	0.0142514	0.0155743	Enriched	Rejected
Q15691	Microtubule-associated protein RP/EB family member 1 [OS=Homo sapiens]	17.7874	0.994	11.6005	11.4995	0.98	7.65031	0.0179495	0.0156043	Enriched	Rejected
O75165	DnaJ homolog subfamily C member 13 [OS=Homo sapiens]	14.5664	0.972	9.54387	5.41695	0.98	3.40007	0.0267889	0.0156344	Rejected	Rejected
P18583-9	Isoform I of Protein SON [OS=Homo sapiens]	2.16515	0.949	2.17719	5.80915	0.98	2.88127	0.0314793	0.0156645	Rejected	Rejected
Q709C8	Vacuolar protein sorting-associated protein 13C [OS=Homo sapiens]	3.00888	0.927	3.23894	335.991	0.98	199.392	0.0347264	0.0156945	Rejected	Rejected
P40306	Proteasome subunit beta type-10 [OS=Homo sapiens]	1.28648	0.867	1.50097	1.36802	0.98	1.31892	0.0422429	0.0157246	Rejected	Rejected
Q9Y6I4-1	Ubiquitin carboxyl-terminal hydrolase 3 [OS=Homo sapiens]	1.1595	0.739	1.3748	3.24452	0.98	3.01955	0.0536981	0.0157547	Rejected	Rejected
P35611-3	Isoform 3 of Alpha-adducin [OS=Homo sapiens]	1.07359	0.577	2.94032	7.46267	0.98	4.49134	0.0633193	0.0157847	Rejected	Rejected
Q9Y2R9	28S ribosomal protein S7, mitochondrial [OS=Homo sapiens]	0.791085	0.038	1.23039	1.40575	0.98	1.30642	0.083644	0.0158148	Rejected	Rejected
P49915	GMP synthase [glutamine-hydrolyzing] [OS=Homo sapiens]	0.128175	0	2.24901	9.95178	0.98	3.41696	0.0865003	0.0158449	Rejected	Rejected
P51149	ras-related protein Rab-7a [OS=Homo sapiens]	14.9995	1	2.98499	5.7322	0.979	4.4445	0.00535177	0.0158749	Enriched	Rejected
Q5MIZ7-1	Serine/threonine-protein phosphatase 4 regulatory subunit 3B [OS=Homo sapiens]	1.29416	0.994	1.18729	2.57558	0.979	2.24034	0.0183704	0.015905	Enriched	Rejected
P49419	Alpha-aminoadipic semialdehyde dehydrogenase [OS=Homo sapiens]	5.58976	0.97	5.28296	2.53744	0.979	2.11449	0.0274504	0.0159351	Rejected	Rejected
P53680	AP-2 complex subunit sigma [OS=Homo sapiens]	2.27163	0.959	2.17803	7.10687	0.979	3.14447	0.0297354	0.0159651	Rejected	Rejected
Q9BY44-1	Eukaryotic translation initiation factor 2A [OS=Homo sapiens]	4.04506	0.904	5.25228	5.00334	0.979	3.71349	0.0384847	0.0159952	Rejected	Rejected
P49750-4	Isoform 4 of YLP motif-containing protein 1 [OS=Homo sapiens]	1.30743	0.881	1.46419	1.9024	0.979	1.79539	0.0410102	0.0160253	Rejected	Rejected
Q8NCG7	Sn1-specific diacylglycerol lipase beta [OS=Homo sapiens]	2.84069	0.854	3.22148	5.08158	0.979	4.30604	0.043656	0.0160553	Rejected	Rejected
P82979	SAP domain-containing ribonucleoprotein [OS=Homo sapiens]	1.81343	0.82	2.69961	7.50501	0.979	3.21646	0.0469333	0.0160854	Rejected	Rejected
P40937-1	Replication factor C subunit 5 [OS=Homo sapiens]	1.21192	0.75	1.57474	8.6334	0.979	3.50098	0.0529765	0.0161155	Rejected	Rejected
Q5JTV8	Torsin-1A-interacting protein 1 [OS=Homo sapiens]	1.4802	0.718	2.46183	3.66863	0.979	2.45091	0.0551714	0.0161455	Rejected	Rejected
Q9BSH4	Translational activator of cytochrome c oxidase 1 [OS=Homo sapiens]	0.885186	0.241	1.34724	7.26975	0.979	6.91062	0.0763379	0.0161756	Rejected	Rejected
P62854	40S ribosomal protein S26 [OS=Homo sapiens]	5.55161	1	2.37032	6.35533	0.978	5.85208	0.0098617	0.0162057	Enriched	Rejected
Q8TF05	Serine/threonine-protein phosphatase 4 regulatory subunit 1 [OS=Homo sapiens]	4.85954	0.998	2.60404	11.2701	0.978	10.363	0.0142213	0.0162357	Enriched	Rejected
Q15075	Early endosome antigen 1 [OS=Homo sapiens]	5.9468	0.993	3.99792	2.45725	0.978	2.12121	0.0184907	0.0162658	Enriched	Rejected
O95299	NADH dehydrogenase [ubiquinone] 1 alpha subcomplex subunit 10, mitochondrial [OS=Homo sapiens]	22.1749	0.965	21.2845	54.4088	0.978	7.91813	0.0287733	0.0162959	Rejected	Rejected
Q6FI81-1	Anamorsin [OS=Homo sapiens]	2.39199	0.948	2.40081	3.18878	0.978	2.2555	0.0316296	0.0163259	Rejected	Rejected
Q9BZZ5-2	Isoform 2 of Apoptosis inhibitor 5 [OS=Homo sapiens]	2.91597	0.94	2.95539	140.268	0.978	127.317	0.032712	0.016356	Rejected	Rejected
P54819	Adenylate kinase 2, mitochondrial [OS=Homo sapiens]	4.76121	0.928	5.11895	33.7324	0.978	4.58195	0.0344257	0.016386	Rejected	Rejected
P49902	Cytosolic purine 5'-nucleotidase [OS=Homo sapiens]	1.31736	0.837	1.58219	5.13243	0.978	3.92226	0.0452195	0.0164161	Rejected	Rejected
Q9Y6G9	Cytoplasmic dynein 1 light intermediate chain 1 [OS=Homo sapiens]	1.23489	0.802	1.468	3.51819	0.978	2.84934	0.048647	0.0164462	Rejected	Rejected
Q5T6V5	UPF0553 protein C9orf64 [OS=Homo sapiens]	2.46372	0.8	2.76415	2.37245	0.978	2.00652	0.0487974	0.0164762	Rejected	Rejected
Q9NQW6	Anillin [OS=Homo sapiens]	1.6651	0.718	7.00653	2.86519	0.978	2.37937	0.0551413	0.0165063	Rejected	Rejected
Q92597	Protein NDRG1 [OS=Homo sapiens]	0.614403	0.045	1.58985	3.12186	0.978	2.64357	0.0834636	0.0165364	Rejected	Rejected
Q9BQE5	apolipoprotein L2 [OS=Homo sapiens]	3.19214	1	1.71562	7.01563	0.977	3.4284	0.0103127	0.0165664	Enriched	Rejected
P15880	40S ribosomal protein S2 [OS=Homo sapiens]	15.4325	0.996	6.16978	2.4292	0.977	2.15983	0.0158749	0.0165965	Enriched	Rejected
Q14692	ribosome biogenesis protein BMS1 homolog [OS=Homo sapiens]	3.15795	0.995	2.28932	2.09594	0.977	1.83545	0.0169573	0.0166266	Enriched	Rejected
P38159-1	RNA-binding motif protein, X chromosome [OS=Homo sapiens]	13.3757	0.993	7.01756	7.07547	0.977	5.54254	0.018641	0.0166566	Enriched	Rejected
O95140	Mitofusin-2 [OS=Homo sapiens]	2.98119	0.98	2.56073	1.60294	0.977	1.53651	0.0243836	0.0166867	Enriched	Rejected
Q9P270	SLAIN motif-containing protein 2 [OS=Homo sapiens]	1.27409	0.913	1.35213	3.79027	0.977	3.39602	0.037252	0.0167168	Rejected	Rejected
P22102-1	trifunctional purine biosynthetic protein adenosine-3 [OS=Homo sapiens]	1.50852	0.848	1.6945	2.15961	0.977	1.88102	0.044107	0.0167468	Rejected	Rejected
Q9NVS9	Pyridoxine-5'-phosphate oxidase [OS=Homo sapiens]	2.21006	0.623	3.56633	2.91156	0.977	2.60148	0.0605532	0.0167769	Rejected	Rejected
Q9HAU0-6	Isoform 6 of Pleckstrin homology domain-containing family A member 5 [OS=Homo sapiens]	0.646709	0.035	1.51999	2.86682	0.977	2.52922	0.0837342	0.016807	Rejected	Rejected
Q15084-2	Isoform 2 of Protein disulfide-isomerase A6 [OS=Homo sapiens]	2.74928	1	1.83474	3.01669	0.976	2.83946	0.00306675	0.016837	Enriched	Rejected
O00186	syntaxin-binding protein 3 [OS=Homo sapiens]	2.84255	0.972	1.99748	2.66059	0.976	2.27498	0.0268491	0.0168671	Rejected	Rejected
P26640	Valine--tRNA ligase [OS=Homo sapiens]	1.77277	0.918	1.9523	3.23007	0.976	2.75763	0.03638	0.0168972	Rejected	Rejected
O15479	Melanoma-associated antigen B2 [OS=Homo sapiens]	1.33073	0.854	1.52763	17.6341	0.976	3.50366	0.043626	0.0169272	Rejected	Rejected
O75477	erlin-1 [OS=Homo sapiens]	1.20095	0.693	1.50403	3.89968	0.976	3.11684	0.0564642	0.0169573	Rejected	Rejected
Q8IVF2-1	Protein AHNAK2 [OS=Homo sapiens]	2.8235	1	1.67709	1.633	0.975	1.49383	0.00228503	0.0169874	Enriched	Rejected
P52565-1	rho GDP-dissociation inhibitor 1 [OS=Homo sapiens]	4.87713	1	2.27094	74.2385	0.975	6.91498	0.00565244	0.0170174	Enriched	Rejected
O75223-1	gamma-glutamylcyclotransferase [OS=Homo sapiens]	6.81385	1	2.80872	2.27078	0.975	2.02712	0.0101022	0.0170475	Enriched	Rejected
P11279	Lysosome-associated membrane glycoprotein 1 [OS=Homo sapiens]	2.81297	0.999	1.74917	3.03246	0.975	2.77382	0.0131389	0.0170776	Enriched	Rejected
Q9Y2Z0-1	Protein SGT1 homolog [OS=Homo sapiens]	7.7891	0.993	6.9834	3.27732	0.975	2.83808	0.0190018	0.0171076	Enriched	Rejected
Q9UHD8-1	Septin-9 [OS=Homo sapiens]	3.31336	0.991	2.69568	2.8605	0.975	2.57766	0.0202044	0.0171377	Enriched	Rejected
P12004	proliferating cell nuclear antigen [OS=Homo sapiens]	2.24622	0.989	1.82455	3.19961	0.975	2.67516	0.0208659	0.0171678	Enriched	Rejected
P53985	Monocarboxylate transporter 1 [OS=Homo sapiens]	2.62238	0.984	2.22133	23.9563	0.975	22.0897	0.0229705	0.0171978	Enriched	Rejected
Q53GS9	U4/U6.U5 tri-snRNP-associated protein 2 [OS=Homo sapiens]	7.97261	0.953	7.69857	7.16021	0.975	6.39529	0.0305773	0.0172279	Rejected	Rejected
O95155-4	Isoform 4 of Ubiquitin conjugation factor E4 B [OS=Homo sapiens]	4.80925	0.951	4.78469	2.99324	0.975	2.35641	0.0309381	0.017258	Rejected	Rejected
O60763-2	Isoform 2 of General vesicular transport factor p115 [OS=Homo sapiens]	2.95064	0.948	2.99558	3.27151	0.975	2.496	0.0315695	0.017288	Rejected	Rejected
Q9H0A0	RNA cytidine acetyltransferase [OS=Homo sapiens]	1.82862	0.889	2.23476	7.09688	0.975	5.73085	0.0398376	0.0173181	Rejected	Rejected
Q9UKV3-1	Apoptotic chromatin condensation inducer in the nucleus [OS=Homo sapiens]	5.56598	0.881	7.02737	4.02932	0.975	3.29067	0.0409501	0.0173482	Rejected	Rejected
P61081	NEDD8-conjugating enzyme Ubc12 [OS=Homo sapiens]	1.44325	0.816	1.98874	7.77684	0.975	6.68725	0.0475947	0.0173782	Rejected	Rejected
Q9NUJ1	Mycophenolic acid acyl-glucuronide esterase, mitochondrial [OS=Homo sapiens]	1.82661	0.795	2.62991	4.0563	0.975	3.44531	0.0491882	0.0174083	Rejected	Rejected
Q96B54	Zinc finger protein 428 [OS=Homo sapiens]	1.76647	0.792	2.58307	4.3792	0.975	3.31485	0.0495189	0.0174384	Rejected	Rejected
Q9BU61-1	NADH dehydrogenase [ubiquinone] 1 alpha subcomplex assembly factor 3 [OS=Homo sapiens]	1.08801	0.611	1.56791	9.42242	0.975	4.76938	0.0613349	0.0174684	Rejected	Rejected
O60506	Heterogeneous nuclear ribonucleoprotein Q [OS=Homo sapiens]	1.42772	0.549	4.0846	58.8958	0.975	43.764	0.0648226	0.0174985	Rejected	Rejected
P05388	60S acidic ribosomal protein P0 [OS=Homo sapiens]	0.469321	0.098	2.59056	5.87948	0.975	4.90186	0.0810583	0.0175286	Rejected	Rejected
O60551	Glycylpeptide N-tetradecanoyltransferase 2 [OS=Homo sapiens]	0.485822	0.007	1.56872	3.23116	0.975	2.78319	0.0854781	0.0175586	Rejected	Rejected
Q01780	exosome component 10 [OS=Homo sapiens]	0.0468792	0.001	3.38894	16.2945	0.975	11.1792	0.08635	0.0175887	Rejected	Rejected
P09382	Galectin-1 [OS=Homo sapiens]	6.81769	1	2.89681	2.45829	0.974	2.29939	0.00685508	0.0176188	Enriched	Rejected
Q9Y394	Dehydrogenase/reductase SDR family member 7 [OS=Homo sapiens]	315.065	1	2.87707	25.3758	0.974	4.87414	0.0109441	0.0176488	Enriched	Rejected
Q9UNN5-1	fas-associated factor 1 [OS=Homo sapiens]	9.36808	1	3.90745	6.29342	0.974	3.20767	0.0113349	0.0176789	Enriched	Rejected
P18669	Phosphoglycerate mutase 1 [OS=Homo sapiens]	6.38862	0.997	3.02341	20.7336	0.974	17.1043	0.0148527	0.017709	Enriched	Rejected
P62244	40S ribosomal protein S15a [OS=Homo sapiens]	3.2801	0.996	2.19201	2.94764	0.974	2.73463	0.0162057	0.017739	Enriched	Rejected
Q12904-2	Isoform 2 of Aminoacyl tRNA synthase complex-interacting multifunctional protein 1 [OS=Homo sapiens]	7.1968	0.994	3.26817	6.16498	0.974	3.52565	0.0176789	0.0177691	Enriched	Rejected
Q5U5X0	Complex III assembly factor LYRM7 [OS=Homo sapiens]	1.60303	0.994	1.40012	1.51397	0.974	1.44418	0.0183403	0.0177992	Enriched	Rejected
Q9NR28-1	Diablo homolog, mitochondrial [OS=Homo sapiens]	3.21992	0.977	2.65693	11.4465	0.974	8.49888	0.0253458	0.0178292	Enriched	Rejected
P60891	ribose-phosphate pyrophosphokinase 1 [OS=Homo sapiens]	2.68103	0.941	2.70256	2.16974	0.974	1.91071	0.0325616	0.0178593	Rejected	Rejected
Q9ULC3	Ras-related protein Rab-23 [OS=Homo sapiens]	1.83714	0.935	1.90663	3.89158	0.974	2.95366	0.0335538	0.0178894	Rejected	Rejected
Q9UBB4-1	Ataxin-10 [OS=Homo sapiens]	4.06001	0.907	4.82114	3.99414	0.974	2.22029	0.0380337	0.0179194	Rejected	Rejected
P43307	Translocon-associated protein subunit alpha [OS=Homo sapiens]	2.39288	0.861	3.32049	14.474	0.974	4.24016	0.0428743	0.0179495	Rejected	Rejected
P42167	Lamina-associated polypeptide 2, isoforms beta/gamma [OS=Homo sapiens]	1.41528	0.845	1.69776	2.26858	0.974	1.92786	0.0444077	0.0179796	Rejected	Rejected
O43488	aflatoxin B1 aldehyde reductase member 2 [OS=Homo sapiens]	1.09873	0.818	1.18335	4.91391	0.974	4.58223	0.0473842	0.0180096	Rejected	Rejected
Q9NUU7	ATP-dependent RNA helicase DDX19A [OS=Homo sapiens]	1.01806	0.505	2.34334	10.3166	0.974	4.26558	0.0676188	0.0180397	Rejected	Rejected
Q8N6T3-2	Isoform 2 of ADP-ribosylation factor GTPase-activating protein 1 [OS=Homo sapiens]	0.734832	0.136	1.53332	8.87563	0.974	7.84622	0.0798256	0.0180698	Rejected	Rejected
O60784	Target of Myb protein 1 [OS=Homo sapiens]	0.309789	0.086	3.47329	4.34541	0.974	3.41264	0.0817198	0.0180998	Rejected	Rejected
P13473-3	Isoform LAMP-2C of Lysosome-associated membrane glycoprotein 2 [OS=Homo sapiens]	0.77213	0.065	1.34241	4.69607	0.974	4.38869	0.0826518	0.0181299	Rejected	Rejected
P22735	Protein-glutamine gamma-glutamyltransferase K [OS=Homo sapiens]	5.23665	1	2.3158	1.65507	0.973	1.60321	0.00811786	0.01816	Enriched	Rejected
Q14980-1	nuclear mitotic apparatus protein 1 [OS=Homo sapiens]	3.11675	0.997	2.20389	2.32023	0.973	1.98509	0.0147324	0.01819	Enriched	Rejected
P22087	rRNA 2'-O-methyltransferase fibrillarin [OS=Homo sapiens]	26.1501	0.993	13.4096	5.53884	0.973	4.01671	0.0187011	0.0182201	Enriched	Rejected
Q9BZE4	Nucleolar GTP-binding protein 1 [OS=Homo sapiens]	2.38182	0.965	2.24419	5.15964	0.973	2.6886	0.0287432	0.0182502	Rejected	Rejected
P13010	X-ray repair cross-complementing protein 5 [OS=Homo sapiens]	2.2244	0.92	2.43146	3.16892	0.973	2.6894	0.0360192	0.0182802	Rejected	Rejected
O00483	Cytochrome c oxidase subunit NDUFA4 [OS=Homo sapiens]	2.58028	0.905	3.36818	4.68914	0.973	3.87869	0.0384546	0.0183103	Rejected	Rejected
P56182	Ribosomal RNA processing protein 1 homolog A [OS=Homo sapiens]	1.09619	0.688	1.30064	39.7316	0.973	11.2574	0.0569753	0.0183403	Rejected	Rejected
P23258	tubulin gamma-1 chain [OS=Homo sapiens]	0.952757	0.386	1.2959	1.46185	0.973	1.38347	0.071798	0.0183704	Rejected	Rejected
P09493-3	Isoform 3 of Tropomyosin alpha-1 chain [OS=Homo sapiens]	14.2387	1	2.68388	34.4117	0.972	11.2314	0.00342754	0.0184005	Enriched	Rejected
P42224-1	Signal transducer and activator of transcription 1-alpha/beta [OS=Homo sapiens]	5.60833	1	2.11708	2.38234	0.972	2.12604	0.00387853	0.0184305	Enriched	Rejected
P81605-2	Isoform 2 of Dermcidin [OS=Homo sapiens]	3.84129	0.999	2.33192	2.26924	0.972	2.00015	0.0132592	0.0184606	Enriched	Rejected
P62266	40S ribosomal protein S23 [OS=Homo sapiens]	1.71727	0.979	1.53927	12.1702	0.972	3.07249	0.0245039	0.0184907	Enriched	Rejected
O94874-1	E3 UFM1-protein ligase 1 [OS=Homo sapiens]	2.24236	0.672	3.52734	11.0256	0.972	9.60409	0.0578172	0.0185207	Rejected	Rejected
P04818	thymidylate synthase [OS=Homo sapiens]	1.20214	0.663	2.07677	2.46615	0.972	2.09903	0.0581479	0.0185508	Rejected	Rejected
P43686	26S proteasome regulatory subunit 6B [OS=Homo sapiens]	1.15235	0.638	1.73435	3.54326	0.972	2.69021	0.0596212	0.0185809	Rejected	Rejected
Q9Y3B8-1	Oligoribonuclease, mitochondrial [OS=Homo sapiens]	1.21574	0.629	1.92421	4.31591	0.972	2.62022	0.0603127	0.0186109	Rejected	Rejected
Q8ND04-2	Isoform 2 of Protein SMG8 [OS=Homo sapiens]	1.1106	0.528	2.732	4.59411	0.972	3.11522	0.0661155	0.018641	Rejected	Rejected
Q9BYD3	39S ribosomal protein L4, mitochondrial [OS=Homo sapiens]	1.00604	0.501	1.33088	4.65736	0.972	4.51527	0.0677691	0.0186711	Rejected	Rejected
O60684	Importin subunit alpha-7 [OS=Homo sapiens]	0.893733	0.339	1.4472	9.83186	0.972	7.68259	0.073181	0.0187011	Rejected	Rejected
O14980	Exportin-1 [OS=Homo sapiens]	5.36138	1	3.02483	1.93803	0.971	1.80004	0.00180397	0.0187312	Enriched	Rejected
P51571	translocon-associated protein subunit delta [OS=Homo sapiens]	7.95284	1	2.48214	1.76917	0.971	1.61855	0.00974143	0.0187613	Enriched	Rejected
Q15185	Prostaglandin E synthase 3 [OS=Homo sapiens]	1.63399	0.912	1.70537	3.97079	0.971	3.33338	0.0373722	0.0187913	Rejected	Rejected
P16989-1	Y-box-binding protein 3 [OS=Homo sapiens]	1.52894	0.66	2.03337	2.91026	0.971	2.64175	0.0582983	0.0188214	Rejected	Rejected
O00217	NADH dehydrogenase [ubiquinone] iron-sulfur protein 8, mitochondrial [OS=Homo sapiens]	2.08431	0.635	2.6924	6.80788	0.971	6.46514	0.0599218	0.0188515	Rejected	Rejected
P49368-1	T-complex protein 1 subunit gamma [OS=Homo sapiens]	2.57961	1	1.74448	4.8508	0.97	4.54357	0.0017739	0.0188815	Enriched	Rejected
Q08J23	tRNA (Cytosine(34)-C(5))-methyltransferase [OS=Homo sapiens]	9.29896	0.994	4.17217	6.3935	0.97	5.65575	0.0178593	0.0189116	Enriched	Rejected
Q14498-1	RNA-binding protein 39 [OS=Homo sapiens]	4.89005	0.972	4.3658	5.67781	0.97	4.42328	0.0267288	0.0189417	Rejected	Rejected
Q9NTZ6	RNA-binding protein 12 [OS=Homo sapiens]	2.39206	0.862	3.02704	9.59494	0.97	5.04236	0.0426939	0.0189717	Rejected	Rejected
Q96L92	Sorting nexin-27 [OS=Homo sapiens]	2.35285	0.835	3.04614	2.27928	0.97	2.00148	0.0454299	0.0190018	Rejected	Rejected
Q8N684-3	Isoform 3 of Cleavage and polyadenylation specificity factor subunit 7 [OS=Homo sapiens]	1.90062	0.809	2.44864	4.49729	0.97	3.02832	0.0482261	0.0190319	Rejected	Rejected
Q5JSH3	WD repeat-containing protein 44 [OS=Homo sapiens]	1.11391	0.69	1.428	2.57842	0.97	2.38829	0.056825	0.0190619	Rejected	Rejected
P20645	Cation-dependent mannose-6-phosphate receptor [OS=Homo sapiens]	11.9589	1	2.76658	3.38048	0.969	3.06881	0.00823812	0.019092	Enriched	Rejected
P49023-3	Isoform Gamma of Paxillin [OS=Homo sapiens]	9.32542	0.997	5.16874	5.14268	0.969	2.66027	0.0154841	0.0191221	Enriched	Rejected
Q15056-1	Eukaryotic translation initiation factor 4H [OS=Homo sapiens]	8.4821	0.995	4.63625	5.03345	0.969	4.83999	0.0171978	0.0191521	Enriched	Rejected
O75533-1	splicing factor 3B subunit 1 [OS=Homo sapiens]	5.15795	0.993	2.73042	2.91257	0.969	2.83536	0.0184305	0.0191822	Enriched	Rejected
P17980	26S proteasome regulatory subunit 6A [OS=Homo sapiens]	2.29372	0.992	1.90495	3.46471	0.969	2.39597	0.0194528	0.0192123	Enriched	Rejected
P30837	Aldehyde dehydrogenase X, mitochondrial [OS=Homo sapiens]	3.65102	0.847	5.18799	2.77041	0.969	2.68446	0.0442874	0.0192423	Rejected	Rejected
Q99720	sigma non-opioid intracellular receptor 1 [OS=Homo sapiens]	0.762638	0.115	1.43555	5.96252	0.969	5.39645	0.0806073	0.0192724	Rejected	Rejected
O14818-1	Proteasome subunit alpha type-7 [OS=Homo sapiens]	22.7243	1	2.65351	6.58503	0.968	5.55179	0.00562237	0.0193025	Enriched	Rejected
Q15363	Transmembrane emp24 domain-containing protein 2 [OS=Homo sapiens]	5.20042	1	2.06936	2.6916	0.968	2.16484	0.010012	0.0193325	Enriched	Rejected
O95782	AP-2 complex subunit alpha-1 [OS=Homo sapiens]	9.43744	0.998	6.19472	2.52249	0.968	2.28132	0.0141311	0.0193626	Enriched	Rejected
Q8WYP5-2	Isoform 2 of Protein ELYS [OS=Homo sapiens]	3.45848	0.972	3.09759	2.4158	0.968	2.28251	0.026819	0.0193927	Rejected	Rejected
Q8TDD1-2	Isoform 2 of ATP-dependent RNA helicase DDX54 [OS=Homo sapiens]	2.89966	0.934	3.56614	3.86311	0.968	3.01384	0.033614	0.0194227	Rejected	Rejected
Q9BRT9	DNA replication complex GINS protein SLD5 [OS=Homo sapiens]	1.31796	0.902	1.44791	11.2725	0.968	11.0072	0.0388455	0.0194528	Rejected	Rejected
Q9BZI7-1	Regulator of nonsense transcripts 3B [OS=Homo sapiens]	2.4433	0.794	2.83231	1.83063	0.968	1.77335	0.0492784	0.0194829	Rejected	Rejected
P09601	heme oxygenase 1 [OS=Homo sapiens]	1.04836	0.609	1.29236	1.96007	0.968	1.85402	0.0614853	0.0195129	Rejected	Rejected
Q7Z2T5-1	TRMT1-like protein [OS=Homo sapiens]	1.69164	0.605	2.32222	2.40567	0.968	2.25967	0.0617559	0.019543	Rejected	Rejected
Q9HB07	UPF0160 protein MYG1, mitochondrial [OS=Homo sapiens]	1.63109	0.533	2.1752	18.3564	0.968	3.60961	0.0658148	0.0195731	Rejected	Rejected
Q9NX58	Cell growth-regulating nucleolar protein [OS=Homo sapiens]	0.970684	0.465	1.54505	1.47493	0.968	1.44974	0.0693325	0.0196031	Rejected	Rejected
Q05193-1	Dynamin-1 [OS=Homo sapiens]	0.946707	0.422	1.44317	5.46324	0.968	4.81212	0.070926	0.0196332	Rejected	Rejected
Q15233	Non-POU domain-containing octamer-binding protein [OS=Homo sapiens]	2.14726	1	1.53105	4.33233	0.967	4.07317	0.00240529	0.0196633	Enriched	Rejected
P52292	Importin subunit alpha-1 [OS=Homo sapiens]	9.60645	1	3.18217	10.3489	0.967	9.81081	0.00348767	0.0196933	Enriched	Rejected
Q99733-2	Isoform 2 of Nucleosome assembly protein 1-like 4 [OS=Homo sapiens]	11.1619	1	5.36973	3.63274	0.967	3.2768	0.00622369	0.0197234	Enriched	Rejected
P82650	28S ribosomal protein S22, mitochondrial [OS=Homo sapiens]	7.08199	1	2.6833	4.13787	0.967	2.98386	0.0108839	0.0197535	Enriched	Rejected
Q9BV44	THUMP domain-containing protein 3 [OS=Homo sapiens]	1.93147	0.948	1.95926	7.62612	0.967	7.33145	0.0316897	0.0197835	Rejected	Rejected
P35580-4	Isoform 4 of Myosin-10 [OS=Homo sapiens]	1.13597	0.604	2.14168	2.12774	0.967	1.89874	0.0617859	0.0198136	Rejected	Rejected
Q9GZZ1-1	N-alpha-acetyltransferase 50 [OS=Homo sapiens]	0.803852	0.247	1.63982	7.31152	0.967	2.64594	0.0760974	0.0198437	Rejected	Rejected
Q13268	dehydrogenase/reductase SDR family member 2, mitochondrial [OS=Homo sapiens]	6.21654	1	4.77016	3.30975	0.966	3.12055	0.00487072	0.0198737	Enriched	Rejected
Q13769	THO complex subunit 5 homolog [OS=Homo sapiens]	2.08506	0.997	1.69203	24.0259	0.966	23.3377	0.0156645	0.0199038	Enriched	Rejected
P18077	60S ribosomal protein L35a [OS=Homo sapiens]	5.4462	0.995	3.20663	8.05829	0.966	4.24261	0.0174384	0.0199339	Enriched	Rejected
Q9NQW7-3	Isoform 3 of Xaa-Pro aminopeptidase 1 [OS=Homo sapiens]	3.67707	0.994	2.09967	10.9755	0.966	3.47837	0.0182201	0.0199639	Enriched	Rejected
Q8WUM0	Nuclear pore complex protein Nup133 [OS=Homo sapiens]	5.25682	0.959	4.96321	98.0152	0.966	88.5914	0.0297054	0.019994	Rejected	Rejected
P60842	Eukaryotic initiation factor 4A-I [OS=Homo sapiens]	1.55359	0.866	1.8764	6.97916	0.966	6.4454	0.0423031	0.0200241	Rejected	Rejected
Q6I9Y2	THO complex subunit 7 homolog [OS=Homo sapiens]	1.70298	0.829	1.99986	1.42733	0.966	1.3907	0.0460914	0.0200541	Rejected	Rejected
P49770	Translation initiation factor eIF-2B subunit beta [OS=Homo sapiens]	1.54599	0.594	2.21764	5.30696	0.966	4.93422	0.0623572	0.0200842	Rejected	Rejected
P35221	Catenin alpha-1 [OS=Homo sapiens]	3.99172	0.988	3.36392	4.19563	0.965	4.00753	0.0215274	0.0201143	Enriched	Rejected
Q9BQA1	Methylosome protein 50 [OS=Homo sapiens]	3.10651	0.983	2.73087	2.5747	0.965	2.4843	0.0233614	0.0201443	Enriched	Rejected
Q92930	Ras-related protein Rab-8B [OS=Homo sapiens]	3.76442	0.973	3.25417	5.39521	0.965	3.05788	0.0265183	0.0201744	Rejected	Rejected
P51532-1	Transcription activator BRG1 [OS=Homo sapiens]	3.42978	0.911	3.7651	2.39596	0.965	2.23423	0.0374324	0.0202044	Rejected	Rejected
P62070-4	Isoform 4 of Ras-related protein R-Ras2 [OS=Homo sapiens]	1.11083	0.661	1.48944	1.42678	0.965	1.38611	0.0582381	0.0202345	Rejected	Rejected
Q86UU1-1	pleckstrin homology-like domain family B member 1 [OS=Homo sapiens]	0.886767	0.194	1.21438	1.37047	0.965	1.33816	0.0778713	0.0202646	Rejected	Rejected
P16070	CD44 antigen [OS=Homo sapiens]	4.43005	0.999	2.96192	3.28496	0.964	2.7038	0.0128082	0.0202946	Enriched	Rejected
Q9UBT2	SUMO-activating enzyme subunit 2 [OS=Homo sapiens]	6.08841	0.996	2.74502	10.8788	0.964	9.57265	0.0162959	0.0203247	Enriched	Rejected
Q96P70	Importin-9 [OS=Homo sapiens]	1.61693	0.852	2.07922	4.04515	0.964	3.5557	0.0438364	0.0203548	Rejected	Rejected
Q99471-1	prefoldin subunit 5 [OS=Homo sapiens]	4.42282	0.844	4.96515	4.63607	0.964	4.56503	0.044558	0.0203848	Rejected	Rejected
Q03701	CCAAT/enhancer-binding protein zeta [OS=Homo sapiens]	0.99487	0.466	1.46536	3.12821	0.964	3.05444	0.0693025	0.0204149	Rejected	Rejected
Q71UM5	40S ribosomal protein S27-like [OS=Homo sapiens]	0.965952	0.434	1.61032	1.37406	0.964	1.33615	0.070475	0.020445	Rejected	Rejected
P40227-1	T-complex protein 1 subunit zeta [OS=Homo sapiens]	5.56636	1	2.40229	10.1193	0.963	9.79375	0.00261575	0.020475	Enriched	Rejected
Q9Y5B8	Nucleoside diphosphate kinase 7 [OS=Homo sapiens]	11.2902	1	4.33862	2.58252	0.963	2.49393	0.0100722	0.0205051	Enriched	Rejected
P17987	T-complex protein 1 subunit alpha [OS=Homo sapiens]	9.96204	0.996	3.60582	4.30347	0.963	4.06077	0.0158148	0.0205352	Enriched	Rejected
Q9Y3C1-2	Isoform 2 of Nucleolar protein 16 [OS=Homo sapiens]	1.67642	0.936	1.71505	2.75405	0.963	2.49396	0.0334035	0.0205652	Rejected	Rejected
Q96CM8-2	Isoform 2 of Acyl-CoA synthetase family member 2, mitochondrial [OS=Homo sapiens]	1.49675	0.9	1.59789	1.73085	0.963	1.69541	0.039086	0.0205953	Rejected	Rejected
Q9Y221-1	60S ribosome subunit biogenesis protein NIP7 homolog [OS=Homo sapiens]	2.171	0.897	2.35766	1.58799	0.963	1.50616	0.0394167	0.0206254	Rejected	Rejected
P50402	Emerin [OS=Homo sapiens]	1.44734	0.78	2.04316	1.52914	0.963	1.5036	0.0507517	0.0206554	Rejected	Rejected
Q9BTT0	Acidic leucine-rich nuclear phosphoprotein 32 family member E [OS=Homo sapiens]	1.328	0.584	4.91811	2.66102	0.963	2.4801	0.0628082	0.0206855	Rejected	Rejected
Q9H6R4-1	Nucleolar protein 6 [OS=Homo sapiens]	6.15467	0.58	7.76668	3.6423	0.963	3.4925	0.063169	0.0207156	Rejected	Rejected
O94776	Metastasis-associated protein MTA2 [OS=Homo sapiens]	1.74011	0.56	3.39494	7.12324	0.963	6.86273	0.0641612	0.0207456	Rejected	Rejected
Q9Y5J1	U3 small nucleolar RNA-associated protein 18 homolog [OS=Homo sapiens]	0.41983	0.089	3.05321	5.18488	0.963	2.88756	0.0816296	0.0207757	Rejected	Rejected
Q9UH99-2	Isoform 2 of SUN domain-containing protein 2 [OS=Homo sapiens]	0.723239	0.023	1.29629	1.31196	0.963	1.29467	0.0845159	0.0208058	Rejected	Rejected
Q00688	peptidyl-prolyl cis-trans isomerase FKBP3 [OS=Homo sapiens]	2.87155	1	1.79123	2.72695	0.962	2.47258	0.00574263	0.0208358	Enriched	Rejected
P46459	Vesicle-fusing ATPase [OS=Homo sapiens]	4.69984	1	2.19214	2.20852	0.962	2.09369	0.0059531	0.0208659	Enriched	Rejected
P62753	40S RIBOSOMAL PROTEIN S6 [OS=Homo sapiens]	2.63489	0.993	2.20314	1.72255	0.962	1.68053	0.0187312	0.020896	Enriched	Rejected
P49711-1	Transcriptional repressor CTCF [OS=Homo sapiens]	2.90115	0.933	2.93941	3.25294	0.962	3.23825	0.0336741	0.020926	Rejected	Rejected
Q9Y333	U6 snRNA-associated Sm-like protein LSm2 [OS=Homo sapiens]	1.23069	0.863	1.35448	1.62468	0.962	1.56471	0.0426338	0.0209561	Rejected	Rejected
P49721	proteasome subunit beta type-2 [OS=Homo sapiens]	1.92158	0.823	2.48527	3.04827	0.962	2.82759	0.0465725	0.0209862	Rejected	Rejected
Q9NS69	Mitochondrial import receptor subunit TOM22 homolog [OS=Homo sapiens]	0.795167	0.149	1.47023	7.40144	0.962	7.27879	0.0794348	0.0210162	Rejected	Rejected
Q16531	DNA damage-binding protein 1 [OS=Homo sapiens]	2.57461	0.997	1.95024	6.37225	0.961	5.94426	0.0147925	0.0210463	Enriched	Rejected
Q9NWV8	BRISC and BRCA1-A complex member 1 [OS=Homo sapiens]	1.32497	0.924	1.35606	1.79819	0.961	1.73741	0.0355683	0.0210764	Rejected	Rejected
Q9HCE1	Putative helicase MOV-10 [OS=Homo sapiens]	0.926968	0.458	1.60642	4.81342	0.961	4.66405	0.0696332	0.0211064	Rejected	Rejected
P00558	phosphoglycerate kinase 1 [OS=Homo sapiens]	6.67628	1	2.16565	5.41542	0.96	4.83287	0.0018641	0.0211365	Enriched	Rejected
P61586	Transforming protein RhoA [OS=Homo sapiens]	20.2221	1	3.0757	4.3133	0.96	4.10707	0.00523151	0.0211666	Enriched	Rejected
P25788-1	Proteasome subunit alpha type-3 [OS=Homo sapiens]	12.603	1	2.63763	4.49745	0.96	3.59303	0.00724594	0.0211966	Enriched	Rejected
O15541	RING finger protein 113A [OS=Homo sapiens]	1.74261	1	1.34467	1.55646	0.96	1.50843	0.0121467	0.0212267	Enriched	Rejected
Q14789-2	Isoform 2 of Golgin subfamily B member 1 [OS=Homo sapiens]	5.10974	0.991	3.97543	2.77229	0.96	2.59583	0.0203247	0.0212568	Enriched	Rejected
Q92878-2	Isoform 2 of DNA repair protein RAD50 [OS=Homo sapiens]	6.61509	0.96	6.18073	5.75883	0.96	5.53764	0.0294047	0.0212868	Rejected	Rejected
Q92499	ATP-dependent RNA helicase DDX1 [OS=Homo sapiens]	4.85756	0.882	5.9089	3.34844	0.96	2.9426	0.0408298	0.0213169	Rejected	Rejected
Q16204	coiled-coil domain-containing protein 6 [OS=Homo sapiens]	1.76115	0.838	2.44608	3.4179	0.96	3.22383	0.0450391	0.021347	Rejected	Rejected
P62424	60S ribosomal protein L7a [OS=Homo sapiens]	1.92485	0.785	2.71882	12.1859	0.96	11.2539	0.0501503	0.021377	Rejected	Rejected
Q92804-1	TATA-binding protein-associated factor 2N [OS=Homo sapiens]	0.898174	0.297	1.40966	1.95155	0.96	1.87561	0.0742333	0.0214071	Rejected	Rejected
P54577	Tyrosine--tRNA ligase, cytoplasmic [OS=Homo sapiens]	7.51649	0.999	4.08485	2.85405	0.959	2.74787	0.0124173	0.0214372	Enriched	Rejected
Q16181	Septin-7 [OS=Homo sapiens]	24.4949	0.99	20.0763	2.57138	0.959	2.31487	0.0205652	0.0214672	Enriched	Rejected
Q9UJA5-1	tRNA (adenine(58)-N(1))-methyltransferase non-catalytic subunit TRM6 [OS=Homo sapiens]	1.42096	0.519	2.88504	3.3531	0.959	3.1798	0.0667168	0.0214973	Rejected	Rejected
Q9GZZ9-1	Ubiquitin-like modifier-activating enzyme 5 [OS=Homo sapiens]	0.974661	0.473	1.44151	2.31553	0.959	2.31159	0.0690619	0.0215274	Rejected	Rejected
O00170	AH receptor-interacting protein [OS=Homo sapiens]	0.816822	0.21	1.44522	6.05509	0.959	5.77035	0.0773301	0.0215574	Rejected	Rejected
P25205-2	Isoform 2 of DNA replication licensing factor MCM3 [OS=Homo sapiens]	9.57996	0.997	5.07846	4.27739	0.958	4.19055	0.0147625	0.0215875	Enriched	Rejected
Q13564-4	Isoform 4 of NEDD8-activating enzyme E1 regulatory subunit [OS=Homo sapiens]	11.627	0.985	10.2155	4.87002	0.958	4.3933	0.0226999	0.0216176	Enriched	Rejected
Q9UPT8	Zinc finger CCCH domain-containing protein 4 [OS=Homo sapiens]	1.31894	0.902	1.46442	2.1827	0.958	2.1328	0.0387853	0.0216476	Rejected	Rejected
Q9NR09	Baculoviral IAP repeat-containing protein 6 [OS=Homo sapiens]	3.24986	0.898	3.52016	2.3831	0.958	2.33456	0.0393265	0.0216777	Rejected	Rejected
Q12849	G-rich sequence factor 1 [OS=Homo sapiens]	2.26963	0.829	3.87272	2.25724	0.958	2.17164	0.0460613	0.0217078	Rejected	Rejected
Q13144	Translation initiation factor eIF-2B subunit epsilon [OS=Homo sapiens]	1.07049	0.522	2.52451	3.01462	0.958	2.83734	0.0665664	0.0217378	Rejected	Rejected
Q96C36	Pyrroline-5-carboxylate reductase 2 [OS=Homo sapiens]	0.95165	0.448	2.56306	1.2106	0.958	1.19257	0.0699639	0.0217679	Rejected	Rejected
P51572-2	Isoform 2 of B-cell receptor-associated protein 31 [OS=Homo sapiens]	7.10083	1	2.20588	2.09521	0.957	2.02222	0.00571257	0.021798	Enriched	Rejected
Q9H583	HEAT repeat-containing protein 1 [OS=Homo sapiens]	3.13709	0.985	2.27969	7.90057	0.957	7.74427	0.0226699	0.021828	Enriched	Rejected
Q53GQ0	Very-long-chain 3-oxoacyl-CoA reductase [OS=Homo sapiens]	1.27638	0.629	1.73352	8.2687	0.957	8.16855	0.0603728	0.0218581	Rejected	Rejected
Q9BY43-2	Isoform 2 of Charged multivesicular body protein 4a [OS=Homo sapiens]	0.952202	0.42	1.53228	1.80395	0.957	1.73905	0.0710162	0.0218882	Rejected	Rejected
Q15334	Lethal(2) giant larvae protein homolog 1 [OS=Homo sapiens]	0.729626	0.029	1.36192	3.07018	0.957	3.00881	0.0842153	0.0219182	Rejected	Rejected
Q9BR76	Coronin-1B [OS=Homo sapiens]	3.89994	1	2.04341	2.27648	0.956	2.22737	0.00953097	0.0219483	Enriched	Rejected
Q00341-1	Vigilin [OS=Homo sapiens]	3.32462	0.807	4.81711	10.9625	0.956	10.7483	0.0483464	0.0219784	Rejected	Rejected
Q9BYT8	Neurolysin, mitochondrial [OS=Homo sapiens]	5.15915	0.99	3.79927	2.77189	0.955	2.67106	0.0206855	0.0220084	Enriched	Rejected
O43290	U4/U6.U5 tri-snRNP-associated protein 1 [OS=Homo sapiens]	2.84688	0.936	2.97278	2.22002	0.955	2.1688	0.0333133	0.0220385	Rejected	Rejected
Q9NSD9	Phenylalanine--tRNA ligase beta subunit [OS=Homo sapiens]	3.9082	0.851	4.59371	2.08148	0.955	2.01037	0.0438966	0.0220686	Rejected	Rejected
Q9Y6H1	Coiled-coil-helix-coiled-coil-helix domain-containing protein 2 [OS=Homo sapiens]	9.46751	0.675	11.8861	15.0293	0.955	14.0725	0.0575767	0.0220986	Rejected	Rejected
P43355	Melanoma-associated antigen 1 [OS=Homo sapiens]	0.803016	0.219	1.5419	1.89789	0.955	1.87352	0.0769393	0.0221287	Rejected	Rejected
O43795	Unconventional myosin-Ib [OS=Homo sapiens]	5.92491	1	3.65805	9.0544	0.954	8.80187	0.00739627	0.0221587	Enriched	Rejected
P63244	Receptor of activated protein C kinase 1 [OS=Homo sapiens]	2.21451	0.899	2.88486	2.10676	0.954	2.0754	0.0391461	0.0221888	Rejected	Rejected
O60271	C-jun-amino-terminal kinase-interacting protein 4 [OS=Homo sapiens]	0.75462	0.5	7.44909	1.91381	0.954	1.87479	0.0677992	0.0222189	Rejected	Rejected
P61923-4	Isoform 4 of Coatomer subunit zeta-1 [OS=Homo sapiens]	0.928578	0.361	1.4097	15.9118	0.954	15.8547	0.0725496	0.0222489	Rejected	Rejected
O43447	peptidyl-prolyl cis-trans isomerase H [OS=Homo sapiens]	0.904927	0.292	1.34237	1.32491	0.954	1.31795	0.0744137	0.022279	Rejected	Rejected
Q92614-1	Unconventional myosin-XVIIIa [OS=Homo sapiens]	3.09083	0.908	3.47513	6.53993	0.953	6.52032	0.0378232	0.0223091	Rejected	Rejected
P17612	cAMP-dependent protein kinase catalytic subunit alpha [OS=Homo sapiens]	5.35275	0.851	6.27533	7.88153	0.953	7.7926	0.0439567	0.0223391	Rejected	Rejected
Q8N3E9	1-phosphatidylinositol 4,5-bisphosphate phosphodiesterase delta-3 [OS=Homo sapiens]	2.60338	0.822	4.21145	2.94331	0.953	2.92208	0.0467228	0.0223692	Rejected	Rejected
P09234	U1 small nuclear ribonucleoprotein C [OS=Homo sapiens]	1.14931	0.771	1.37286	1.46355	0.953	1.46057	0.0515634	0.0223993	Rejected	Rejected
P27797	Calreticulin [OS=Homo sapiens]	5.64584	0.99	3.56385	2.12734	0.952	2.12489	0.0205051	0.0224293	Enriched	Rejected
P61421	V-type proton ATPase subunit d 1 [OS=Homo sapiens]	2.89012	0.906	3.38051	6.39102	0.952	6.27275	0.0382141	0.0224594	Rejected	Rejected
Q9UID3-1	Vacuolar protein sorting-associated protein 51 homolog [OS=Homo sapiens]	1.12699	0.781	1.29216	1.17284	0.952	1.17279	0.0507216	0.0224895	Rejected	Rejected
O75616-1	GTPase Era, mitochondrial [OS=Homo sapiens]	3.78734	0.572	5.36097	4.52416	0.952	4.52306	0.0635598	0.0225195	Rejected	Rejected
Q8IUR7-1	Armadillo repeat-containing protein 8 [OS=Homo sapiens]	1.02553	0.519	1.37331	1.67213	0.952	1.67171	0.0666867	0.0225496	Rejected	Rejected
Q99436	Proteasome subunit beta type-7 [OS=Homo sapiens]	4.77192	1	2.3022	2.59287	0.951	2.59287	0.00929044	0.0225797	Enriched	Rejected
Q93009	Ubiquitin carboxyl-terminal hydrolase 7 [OS=Homo sapiens]	4.96532	0.992	2.88592	2.32369	0.951	2.32369	0.0196933	0.0226097	Enriched	Rejected
P62841	40S ribosomal protein S15 [OS=Homo sapiens]	4.02891	0.888	7.41555	3.55563	0.951	3.55563	0.0400481	0.0226398	Rejected	Rejected
O00571	ATP-dependent RNA helicase DDX3X [OS=Homo sapiens]	1.88576	0.647	4.31368	5.70424	0.951	5.70424	0.05911	0.0226699	Rejected	Rejected
Q9NUL3	Double-stranded RNA-binding protein Staufen homolog 2 [OS=Homo sapiens]	1.06493	0.64	1.29915	4.21382	0.951	4.18578	0.059531	0.0226999	Rejected	Rejected
Q9Y6D5	Brefeldin A-inhibited guanine nucleotide-exchange protein 2 [OS=Homo sapiens]	1.10082	0.636	1.72703	1.662	0.951	1.65017	0.0598617	0.02273	Rejected	Rejected
Q9BZJ0	Crooked neck-like protein 1 [OS=Homo sapiens]	4.52819	0.903	4.86961	1.71676	0.95	1.71341	0.0387252	0.0227601	Rejected	Rejected
Q9UL40-1	Zinc finger protein 346 [OS=Homo sapiens]	6.12622	0.851	7.47408	2.58376	0.95	2.58423	0.0440168	0.0227901	Rejected	Rejected
Q13868	Exosome complex component Rrp4 [OS=Homo sapiens]	1.13373	0.774	1.31443	2.48009	0.95	2.48188	0.0514131	0.0228202	Rejected	Rejected
P35637-1	RNA-binding protein FUS [OS=Homo sapiens]	0.955404	0.474	2.00777	4.56459	0.95	4.56568	0.0690018	0.0228503	Rejected	Rejected
Q5VT79	annexin A8-like protein 1 [OS=Homo sapiens]	10.2534	1	5.48198	2.67635	0.949	2.68132	0.00947084	0.0228803	Enriched	Rejected
P17812	CTP synthase 1 [OS=Homo sapiens]	2.01166	0.999	1.55929	1.57182	0.949	1.58081	0.0125376	0.0229104	Enriched	Rejected
P14625	Endoplasmin [OS=Homo sapiens]	2.23659	0.99	1.74753	2.24873	0.949	2.25618	0.020445	0.0229405	Enriched	Rejected
P06756	Integrin alpha-V [OS=Homo sapiens]	1.04862	0.606	1.41382	5.50222	0.949	5.6187	0.0616356	0.0229705	Rejected	Rejected
Q92841	Probable ATP-dependent RNA helicase DDX17 [OS=Homo sapiens]	1.04587	0.562	2.05489	1.91046	0.949	1.91201	0.0640409	0.0230006	Rejected	Rejected
P82930	28S ribosomal protein S34, mitochondrial [OS=Homo sapiens]	0.956661	0.385	1.47581	1.69848	0.949	1.72846	0.0718581	0.0230307	Rejected	Rejected
P14618-2	Isoform M1 of Pyruvate kinase PKM [OS=Homo sapiens]	0.739375	0.064	1.41207	1.56107	0.949	1.57066	0.082712	0.0230607	Rejected	Rejected
P10809	60 kDa heat shock protein, mitochondrial [OS=Homo sapiens]	18.1331	1	12.5341	11.8711	0.948	11.8832	0.000420926	0.0230908	Enriched	Rejected
P55010	Eukaryotic translation initiation factor 5 [OS=Homo sapiens]	1.81464	0.958	1.79025	1.37302	0.948	1.39227	0.0297655	0.0231209	Rejected	Rejected
P84157-2	Isoform 2 of Matrix-remodeling-associated protein 7 [OS=Homo sapiens]	4.29784	0.888	4.71453	2.05748	0.948	2.06231	0.0401984	0.0231509	Rejected	Rejected
P46087-4	Isoform 4 of Probable 28S rRNA (cytosine(4447)-C(5))-methyltransferase [OS=Homo sapiens]	3.21654	0.835	5.43512	14.5893	0.948	14.768	0.0453097	0.023181	Rejected	Rejected
Q86YP4-3	Isoform 3 of Transcriptional repressor p66-alpha [OS=Homo sapiens]	1.05681	0.648	1.33764	1.53984	0.948	1.56373	0.05908	0.0232111	Rejected	Rejected
Q9BQE3	Tubulin alpha-1C chain [OS=Homo sapiens]	0.819835	0.153	1.38293	6.47008	0.948	6.64463	0.0792243	0.0232411	Rejected	Rejected
Q8IYB8	ATP-dependent RNA helicase SUPV3L1, mitochondrial [OS=Homo sapiens]	0.869373	0.121	1.18998	4.27882	0.948	4.28663	0.0803067	0.0232712	Rejected	Rejected
Q8N3R9-1	MAGUK p55 subfamily member 5 [OS=Homo sapiens]	4.84475	0.999	2.57184	3.14949	0.947	3.26049	0.0132892	0.0233013	Enriched	Rejected
Q86V48-1	Leucine zipper protein 1 [OS=Homo sapiens]	2.88738	0.981	2.28989	11.7034	0.947	11.8015	0.0239627	0.0233313	Enriched	Rejected
P47897	glutamine--tRNA ligase [OS=Homo sapiens]	7.64857	0.969	4.39656	2.08057	0.947	2.08897	0.0276308	0.0233614	Rejected	Rejected
Q10570	Cleavage and polyadenylation specificity factor subunit 1 [OS=Homo sapiens]	1.83288	0.807	3.36207	4.73286	0.947	4.83883	0.0483764	0.0233915	Rejected	Rejected
O75694	nuclear pore complex protein nup155 [OS=Homo sapiens]	1.62973	0.744	2.27982	4.23236	0.947	4.26745	0.0534275	0.0234215	Rejected	Rejected
Q9UHG3	prenylcysteine oxidase 1 [OS=Homo sapiens]	1.04213	0.568	1.39689	11.1154	0.947	11.1225	0.0637102	0.0234516	Rejected	Rejected
Q07817-1	bcl-2-like protein 1 [OS=Homo sapiens]	0.885347	0.28	1.54093	4.23129	0.947	4.26185	0.0748948	0.0234817	Rejected	Rejected
P30042-1	ES1 protein homolog, mitochondrial [OS=Homo sapiens]	0.765309	0.149	1.55819	2.31943	0.947	2.32758	0.0794047	0.0235117	Rejected	Rejected
Q9Y490	Talin-1 [OS=Homo sapiens]	3.1671	1	1.70648	2.10791	0.946	2.11475	0.000210463	0.0235418	Enriched	Rejected
Q9H0D6-1	5'-3' exoribonuclease 2 [OS=Homo sapiens]	6.15098	0.995	4.08206	15.7473	0.946	15.8664	0.0171076	0.0235719	Enriched	Rejected
P16615	Sarcoplasmic/endoplasmic reticulum calcium ATPase 2 [OS=Homo sapiens]	2.3929	0.977	1.95347	2.02598	0.946	2.04222	0.0251353	0.0236019	Enriched	Rejected
P49720	proteasome subunit beta type-3 [OS=Homo sapiens]	4.01439	0.976	3.41596	3.34688	0.946	3.41657	0.025466	0.023632	Enriched	Rejected
Q14195-2	Isoform LCRMP-4 of Dihydropyrimidinase-related protein 3 [OS=Homo sapiens]	10.8701	0.915	12.0194	4.56262	0.946	4.62594	0.0366807	0.0236621	Rejected	Rejected
Q9Y5L0-2	transportin-3 [OS=Homo sapiens]	1.11303	0.672	1.53892	1.4675	0.946	1.47842	0.0577571	0.0236921	Rejected	Rejected
P06730-2	Isoform 2 of Eukaryotic translation initiation factor 4E [OS=Homo sapiens]	0.988399	0.494	1.75943	8.83189	0.946	9.07515	0.0679796	0.0237222	Rejected	Rejected
Q92542-1	Nicastrin [OS=Homo sapiens]	0.701603	0.097	1.63364	5.04917	0.946	5.05548	0.0812387	0.0237523	Rejected	Rejected
P40925-3	Isoform 3 of Malate dehydrogenase, cytoplasmic [OS=Homo sapiens]	9.3644	0.998	3.92662	2.5875	0.945	2.6628	0.0139507	0.0237823	Enriched	Rejected
Q8TAQ2	SWI/SNF complex subunit SMARCC2 [OS=Homo sapiens]	24.5966	0.994	4.9681	2.73499	0.945	2.8293	0.017739	0.0238124	Enriched	Rejected
P23528	Cofilin-1 [OS=Homo sapiens]	2.05026	0.988	1.67597	2.54579	0.945	2.64872	0.0214973	0.0238425	Enriched	Rejected
Q9NYU2-1	UDP-glucose:glycoprotein glucosyltransferase 1 [OS=Homo sapiens]	7.78809	0.986	6.38947	1.79467	0.945	1.81555	0.0224293	0.0238725	Enriched	Rejected
P00568	Adenylate kinase isoenzyme 1 [OS=Homo sapiens]	1.51958	0.771	2.17537	2.59445	0.945	2.69615	0.0515334	0.0239026	Rejected	Rejected
Q15014	Mortality factor 4-like protein 2 [OS=Homo sapiens]	1.04527	0.613	1.28411	3.02484	0.945	3.07023	0.0612447	0.0239327	Rejected	Rejected
P11940-1	Polyadenylate-binding protein 1 [OS=Homo sapiens]	3.40406	0.993	2.18349	3.25834	0.944	3.36402	0.0184606	0.0239627	Enriched	Rejected
Q9Y294	Histone chaperone ASF1A [OS=Homo sapiens]	1.05188	0.612	1.26373	1.53756	0.944	1.56862	0.0613049	0.0239928	Rejected	Rejected
O95810	caveolae-associated protein 2 [OS=Homo sapiens]	0.959808	0.441	1.48954	4.73482	0.944	4.86365	0.0702946	0.0240229	Rejected	Rejected
P16949-1	Stathmin [OS=Homo sapiens]	8.05096	1	2.66301	4.74454	0.943	4.92518	0.00871918	0.0240529	Enriched	Rejected
Q9UK45	U6 snRNA-associated Sm-like protein LSm7 [OS=Homo sapiens]	0.989568	0.491	1.4321	1.30902	0.943	1.31536	0.0682201	0.024083	Rejected	Rejected
Q05682-5	Isoform 5 of Caldesmon [OS=Homo sapiens]	5.31986	1	2.36043	2.50412	0.942	2.58205	0.00246542	0.024113	Enriched	Rejected
P31949	protein S100-A11 [OS=Homo sapiens]	6.48736	1	2.79491	3.80319	0.942	3.95451	0.00907998	0.0241431	Enriched	Rejected
Q9NUQ6-3	Isoform 3 of SPATS2-like protein [OS=Homo sapiens]	10.8644	0.833	13.4176	28.0955	0.942	29.2697	0.04546	0.0241732	Rejected	Rejected
P54278	Mismatch repair endonuclease PMS2 [OS=Homo sapiens]	1.04795	0.61	1.3397	1.31801	0.942	1.33039	0.0613951	0.0242032	Rejected	Rejected
O95825-1	Quinone oxidoreductase-like protein 1 [OS=Homo sapiens]	0.932854	0.49	2.90188	4.43008	0.942	4.61617	0.0682502	0.0242333	Rejected	Rejected
Q13835	Plakophilin-1 [OS=Homo sapiens]	4.51289	1	2.63664	4.39584	0.941	4.59843	0.00817799	0.0242634	Enriched	Rejected
P54725-1	UV excision repair protein RAD23 homolog A [OS=Homo sapiens]	8.85116	1	2.65424	5.77627	0.941	5.86748	0.0107937	0.0242934	Enriched	Rejected
P62263	40S ribosomal protein S14 [OS=Homo sapiens]	1.23805	0.645	2.10118	2.59923	0.941	2.74612	0.0592604	0.0243235	Rejected	Rejected
Q9NT62	ubiquitin-like-conjugating enzyme ATG3 [OS=Homo sapiens]	0.823955	0.207	1.48497	2.25898	0.941	2.40229	0.0773903	0.0243536	Rejected	Rejected
Q53T59	HCLS1-binding protein 3 [OS=Homo sapiens]	0.723128	0.087	1.41376	8.26966	0.941	8.56781	0.0816897	0.0243836	Rejected	Rejected
O60493-1	sorting nexin-3 [OS=Homo sapiens]	0.586299	0.012	1.61554	4.12062	0.941	4.31201	0.0851173	0.0244137	Rejected	Rejected
P21399	Cytoplasmic aconitate hydratase [OS=Homo sapiens]	14.069	1	6.48156	15.6498	0.94	16.6676	0.00646422	0.0244438	Enriched	Rejected
P07602-3	Isoform Sap-mu-9 of Prosaposin [OS=Homo sapiens]	2.91801	0.992	2.34162	5.72375	0.94	6.41077	0.0198136	0.0244738	Enriched	Rejected
O95671-1	N-acetylserotonin O-methyltransferase-like protein [OS=Homo sapiens]	1.98626	0.982	1.6965	2.63988	0.94	2.76174	0.0236921	0.0245039	Enriched	Rejected
Q16881-1	Thioredoxin reductase 1, cytoplasmic [OS=Homo sapiens]	1.88263	0.95	1.88323	1.7927	0.94	1.8326	0.0310583	0.024534	Rejected	Rejected
P10253	lysosomal alpha-glucosidase [OS=Homo sapiens]	8.0625	0.72	10.6567	4.47627	0.94	4.76805	0.0549609	0.024564	Rejected	Rejected
Q8N1F7-1	Nuclear pore complex protein Nup93 [OS=Homo sapiens]	1.14755	0.655	1.86564	8.36982	0.94	8.75394	0.0585989	0.0245941	Rejected	Rejected
P43358	Melanoma-associated antigen 4 [OS=Homo sapiens]	2.16065	1	1.63115	2.40111	0.939	2.4692	0.00520144	0.0246242	Enriched	Rejected
P15121	aldose reductase [OS=Homo sapiens]	2.60095	0.998	1.87817	1.90847	0.939	1.99094	0.0140108	0.0246542	Enriched	Rejected
Q99829	Copine-1 [OS=Homo sapiens]	4.69346	0.998	3.29184	4.19548	0.939	4.53313	0.0141612	0.0246843	Enriched	Rejected
Q5SY16	Polynucleotide 5'-hydroxyl-kinase NOL9 [OS=Homo sapiens]	4.864	0.977	2.87931	7.58594	0.939	7.76178	0.0253758	0.0247144	Enriched	Rejected
Q9BRJ2	39S ribosomal protein L45, mitochondrial [OS=Homo sapiens]	2.06264	0.903	2.26216	4.57966	0.939	5.19177	0.0386651	0.0247444	Rejected	Rejected
Q14919-2	Isoform 2 of Dr1-associated corepressor [OS=Homo sapiens]	4.15441	0.826	4.61835	1.91158	0.939	1.97627	0.0463319	0.0247745	Rejected	Rejected
P51649-2	Isoform 2 of Succinate-semialdehyde dehydrogenase, mitochondrial [OS=Homo sapiens]	1.71122	0.82	2.06364	1.44723	0.939	1.50049	0.0471437	0.0248046	Rejected	Rejected
Q9NRV9	Heme-binding protein 1 [OS=Homo sapiens]	1.45183	0.781	1.75472	1.68572	0.939	1.73627	0.0506615	0.0248346	Rejected	Rejected
Q9NQX3-2	Isoform 2 of Gephyrin [OS=Homo sapiens]	0.529143	0.01	1.55446	1.53184	0.939	1.55898	0.0852375	0.0248647	Rejected	Rejected
P54886	delta-1-pyrroline-5-carboxylate synthase [OS=Homo sapiens]	11.3778	1	3.60439	2.54022	0.938	2.62313	0.003638	0.0248948	Enriched	Rejected
Q16643-3	Isoform 3 of Drebrin [OS=Homo sapiens]	3.4801	0.999	2.13654	2.04167	0.938	2.17225	0.0125676	0.0249248	Enriched	Rejected
P07437	tubulin beta chain [OS=Homo sapiens]	7.2217	0.996	4.03367	3.54265	0.938	3.90874	0.0157547	0.0249549	Enriched	Rejected
O43615	Mitochondrial import inner membrane translocase subunit TIM44 [OS=Homo sapiens]	3.16919	0.973	2.65077	2.75109	0.938	3.05563	0.0264582	0.024985	Rejected	Rejected
Q99848	Probable rRNA-processing protein EBP2 [OS=Homo sapiens]	1.38269	0.859	1.54487	50.1433	0.938	53.6262	0.0430247	0.025015	Rejected	Rejected
Q99653	Calcineurin B homologous protein 1 [OS=Homo sapiens]	1.74433	0.736	3.59867	3.99341	0.938	4.11046	0.0539086	0.0250451	Rejected	Rejected
Q969H8	Myeloid-derived growth factor [OS=Homo sapiens]	0.894972	0.372	1.62668	2.15127	0.938	2.21899	0.0722189	0.0250752	Rejected	Rejected
O75691	Small subunit processome component 20 homolog [OS=Homo sapiens]	0.593689	0.061	1.71927	5.62108	0.938	5.86077	0.0828322	0.0251052	Rejected	Rejected
P04792	Heat shock protein beta-1 [OS=Homo sapiens]	4.42625	1	1.92659	2.10901	0.937	2.3355	0.00288635	0.0251353	Enriched	Rejected
P62140	Serine/threonine-protein phosphatase PP1-beta catalytic subunit [OS=Homo sapiens]	22.9979	1	6.55406	2.58835	0.937	2.6513	0.00460012	0.0251654	Enriched	Rejected
Q712K3	Ubiquitin-conjugating enzyme E2 R2 [OS=Homo sapiens]	5.4058	0.997	2.96374	4.0754	0.937	4.28301	0.0156945	0.0251954	Enriched	Rejected
P61088	ubiquitin-conjugating enzyme E2 N [OS=Homo sapiens]	1.79348	0.979	1.62867	4.83944	0.937	5.07477	0.0246542	0.0252255	Enriched	Rejected
Q8WX92	Negative elongation factor B [OS=Homo sapiens]	4.8656	0.975	4.64858	2.76771	0.937	2.99082	0.0257968	0.0252556	Enriched	Rejected
Q15005	Signal peptidase complex subunit 2 [OS=Homo sapiens]	0.870429	0.319	1.6632	11.6984	0.937	12.2122	0.0736621	0.0252856	Rejected	Rejected
P48449-1	lanosterol synthase [OS=Homo sapiens]	4.49237	1	2.51183	5.16208	0.936	5.52305	0.00691521	0.0253157	Enriched	Rejected
Q8IWA0	WD repeat-containing protein 75 [OS=Homo sapiens]	0.920224	0.371	1.46033	1.40497	0.936	1.44726	0.0722489	0.0253458	Rejected	Rejected
Q9UM54-6	Isoform 6 of Unconventional myosin-VI [OS=Homo sapiens]	12.7534	1	3.75846	2.90305	0.935	3.54804	0.00652435	0.0253758	Enriched	Rejected
P61163	Alpha-centractin [OS=Homo sapiens]	19.3268	1	3.48349	24.1287	0.935	27.6662	0.00697535	0.0254059	Enriched	Rejected
Q15370-2	Isoform 2 of Elongin-B [OS=Homo sapiens]	1.94298	0.788	2.51865	8.66472	0.935	9.21256	0.0499399	0.025436	Rejected	Rejected
Q9ULW0-2	Isoform 2 of Targeting protein for Xklp2 [OS=Homo sapiens]	5.56589	0.759	6.84168	1.80817	0.935	1.88899	0.0524354	0.025466	Rejected	Rejected
Q99986	Serine/threonine-protein kinase VRK1 [OS=Homo sapiens]	1.24724	0.552	2.86685	3.94377	0.935	4.43481	0.0646121	0.0254961	Rejected	Rejected
P02511	Alpha-crystallin B chain [OS=Homo sapiens]	0.30482	0.001	1.84113	2.71022	0.935	2.83223	0.0862898	0.0255262	Rejected	Rejected
O95297-1	Myelin protein zero-like protein 1 [OS=Homo sapiens]	3.02861	0.72	3.50489	2.43212	0.934	2.51024	0.055021	0.0255562	Rejected	Rejected
Q9NZJ7	Mitochondrial carrier homolog 1 [OS=Homo sapiens]	1.80049	0.623	3.61031	2.06424	0.934	2.20487	0.0607035	0.0255863	Rejected	Rejected
P38606	V-type proton ATPase catalytic subunit A [OS=Homo sapiens]	3.78409	1	1.92921	2.09696	0.933	2.24302	0.00327721	0.0256164	Enriched	Rejected
Q86SQ0-1	Pleckstrin homology-like domain family B member 2 [OS=Homo sapiens]	1.31313	0.651	1.90443	1.73081	0.933	1.74255	0.0588094	0.0256464	Rejected	Rejected
O14639-1	Actin-binding LIM protein 1 [OS=Homo sapiens]	0.823782	0.257	1.74494	234.601	0.933	243.643	0.0756765	0.0256765	Rejected	Rejected
Q6ZVX7	F-box only protein 50 [OS=Homo sapiens]	2.91322	1	2.0454	2.44906	0.932	2.62526	0.0119964	0.0257066	Enriched	Rejected
P35606	Coatomer subunit beta' [OS=Homo sapiens]	2.1608	0.861	2.54116	4.01508	0.932	4.491	0.0427841	0.0257366	Rejected	Rejected
P62316	Small nuclear ribonucleoprotein Sm D2 [OS=Homo sapiens]	1.70988	0.853	2.30787	2.47024	0.932	2.7304	0.0436861	0.0257667	Rejected	Rejected
P32969	60S ribosomal protein L9 [OS=Homo sapiens]	0.859578	0.42	2.34839	10.3705	0.932	12.9457	0.0709561	0.0257968	Rejected	Rejected
Q9BRA2	Thioredoxin domain-containing protein 17 [OS=Homo sapiens]	0.539795	0.014	1.57356	3.70175	0.932	4.33803	0.0849669	0.0258268	Rejected	Rejected
P31040	Succinate dehydrogenase [ubiquinone] flavoprotein subunit, mitochondrial [OS=Homo sapiens]	2.83631	1	1.84152	2.96064	0.931	3.19977	0.00432952	0.0258569	Enriched	Rejected
Q9NXF1	Testis-expressed protein 10 [OS=Homo sapiens]	7.5344	1	2.67477	2.05207	0.931	2.25292	0.00956103	0.025887	Enriched	Rejected
P06132	Uroporphyrinogen decarboxylase [OS=Homo sapiens]	1.05332	0.554	1.44029	12.672	0.931	13.2438	0.0645219	0.025917	Rejected	Rejected
Q9Y3U8	60S ribosomal protein L36 [OS=Homo sapiens]	1.29277	0.528	3.3429	3.44164	0.931	3.62198	0.0660553	0.0259471	Rejected	Rejected
Q9Y4A5	Transformation/transcription domain-associated protein [OS=Homo sapiens]	0.995346	0.518	1.50172	1.20305	0.931	1.22975	0.066837	0.0259771	Rejected	Rejected
Q14160-3	Isoform 3 of Protein scribble homolog [OS=Homo sapiens]	3.23531	0.982	2.83033	3.64767	0.93	3.99593	0.0235117	0.0260072	Enriched	Rejected
P16401	Histone H1.5 [OS=Homo sapiens]	1.7641	0.905	1.87199	1.4744	0.93	1.51393	0.0383343	0.0260373	Rejected	Rejected
P63151-2	Isoform 2 of Serine/threonine-protein phosphatase 2A 55 kDa regulatory subunit B alpha isoform [OS=Homo sapiens]	2.90467	0.872	3.48242	8.51401	0.93	9.13068	0.0417919	0.0260673	Rejected	Rejected
Q9UBQ7	Glyoxylate reductase/hydroxypyruvate reductase [OS=Homo sapiens]	3.66372	0.793	5.63586	2.84285	0.93	3.02271	0.0493385	0.0260974	Rejected	Rejected
O00764-1	Pyridoxal kinase [OS=Homo sapiens]	1.94223	0.717	3.80374	8.90886	0.93	10.2982	0.0552616	0.0261275	Rejected	Rejected
P29692-2	Isoform 2 of Elongation factor 1-delta [OS=Homo sapiens]	4.89899	1	2.07591	1.69388	0.929	1.78572	0.004089	0.0261575	Enriched	Rejected
Q9Y262	eukaryotic translation initiation factor 3 subunit L [OS=Homo sapiens]	6.78498	1	2.53417	2.91034	0.929	3.275	0.00472038	0.0261876	Enriched	Rejected
Q15181	Inorganic pyrophosphatase [OS=Homo sapiens]	2.99032	0.942	3.13203	2.63526	0.929	2.87794	0.0324714	0.0262177	Rejected	Rejected
Q5SRD1	Putative mitochondrial import inner membrane translocase subunit Tim23B [OS=Homo sapiens]	0.868505	0.302	1.41007	1.30907	0.929	1.32827	0.0740529	0.0262477	Rejected	Rejected
P84103	Serine/arginine-rich splicing factor 3 [OS=Homo sapiens]	3.21158	0.918	3.97792	6.98877	0.928	7.47425	0.0364402	0.0262778	Rejected	Rejected
P49247	ribose-5-phosphate isomerase [OS=Homo sapiens]	1.09079	0.689	1.28757	2.44074	0.928	2.55667	0.0568851	0.0263079	Rejected	Rejected
O15145	Actin-related protein 2/3 complex subunit 3 [OS=Homo sapiens]	2.03723	0.901	2.57676	2.38303	0.927	2.50942	0.0390259	0.0263379	Rejected	Rejected
Q9NQG5	regulation of nuclear pre-mRNA domain-containing protein 1B [OS=Homo sapiens]	0.716656	0.129	1.58404	15.304	0.927	15.7002	0.0800661	0.026368	Rejected	Rejected
Q9NUP9	Protein lin-7 homolog C [OS=Homo sapiens]	0.599941	0.022	1.54063	102.709	0.927	109.962	0.0846362	0.0263981	Rejected	Rejected
P42166	Lamina-associated polypeptide 2, isoform alpha [OS=Homo sapiens]	0.396793	0.014	1.99689	3.47735	0.927	4.04375	0.0849369	0.0264281	Rejected	Rejected
Q2M2I8-1	AP2-associated protein kinase 1 [OS=Homo sapiens]	2.99538	0.825	3.43463	1.88831	0.926	1.97612	0.0465123	0.0264582	Rejected	Rejected
O43837-1	isocitrate dehydrogenase [NAD] subunit beta, mitochondrial [OS=Homo sapiens]	1.12416	0.717	1.39202	1.14544	0.926	1.15741	0.0553217	0.0264883	Rejected	Rejected
P26196	Probable ATP-dependent RNA helicase DDX6 [OS=Homo sapiens]	2.08777	0.895	2.75947	3.75448	0.925	4.36664	0.0395069	0.0265183	Rejected	Rejected
Q9H2P9-5	Isoform 5 of Diphthine methyl ester synthase [OS=Homo sapiens]	1.10182	0.691	1.36742	1.96421	0.925	2.05922	0.0567649	0.0265484	Rejected	Rejected
P67809	Nuclease-sensitive element-binding protein 1 [OS=Homo sapiens]	1.02508	0.497	2.29116	1.98512	0.925	2.20842	0.0678593	0.0265785	Rejected	Rejected
Q01518-1	adenylyl cyclase-associated protein 1 [OS=Homo sapiens]	4.00744	1	2.26804	5.3278	0.924	6.53256	0.00258569	0.0266085	Enriched	Rejected
P52434-4	Isoform 4 of DNA-directed RNA polymerases I, II, and III subunit RPABC3 [OS=Homo sapiens]	1.92497	0.953	1.91981	3.70832	0.924	4.5503	0.0306073	0.0266386	Rejected	Rejected
P50990	T-complex protein 1 subunit theta [OS=Homo sapiens]	6.67268	1	2.2957	2.5291	0.923	2.93136	0.000992183	0.0266687	Enriched	Rejected
P09104	Gamma-enolase [OS=Homo sapiens]	7.05658	1	3.35139	3.60021	0.923	3.96278	0.00414913	0.0266987	Enriched	Rejected
P06744-2	Isoform 2 of Glucose-6-phosphate isomerase [OS=Homo sapiens]	2.69835	0.969	2.53469	7.16508	0.923	8.65207	0.0276609	0.0267288	Rejected	Rejected
Q9GZT3-1	SRA stem-loop-interacting RNA-binding protein, mitochondrial [OS=Homo sapiens]	1.09761	0.751	1.23748	7.977	0.923	8.42342	0.0529164	0.0267589	Rejected	Rejected
P60520	Gamma-aminobutyric acid receptor-associated protein-like 2 [OS=Homo sapiens]	0.804402	0.125	1.36633	1.1806	0.923	1.20979	0.0801864	0.0267889	Rejected	Rejected
O75718	Cartilage-associated protein [OS=Homo sapiens]	1.84668	0.631	3.68613	1.31953	0.922	1.34378	0.0602225	0.026819	Rejected	Rejected
P17301	Integrin alpha-2 [OS=Homo sapiens]	0.815863	0.24	1.54697	1.34656	0.922	1.41053	0.0763981	0.0268491	Rejected	Rejected
P62333	26S proteasome regulatory subunit 10B [OS=Homo sapiens]	6.24093	1	2.72998	4.19807	0.921	5.26547	0.00664462	0.0268791	Enriched	Rejected
Q00610-1	Clathrin heavy chain 1 [OS=Homo sapiens]	1.55209	0.983	1.39683	2.05973	0.921	2.19495	0.0230307	0.0269092	Enriched	Rejected
Q7Z478	ATP-dependent RNA helicase Dhx29 [OS=Homo sapiens]	3.17276	0.907	3.9553	7.58032	0.921	8.40949	0.0380637	0.0269393	Rejected	Rejected
P57740	Nuclear pore complex protein Nup107 [OS=Homo sapiens]	1.29067	0.684	2.4287	1.50974	0.921	1.67301	0.0572159	0.0269693	Rejected	Rejected
O14744	Protein arginine N-methyltransferase 5 [OS=Homo sapiens]	11.9895	0.982	9.17485	112.145	0.92	137.865	0.0235719	0.0269994	Enriched	Rejected
Q06124	tyrosine-protein phosphatase non-receptor type 11 [OS=Homo sapiens]	184.324	0.937	186.965	4.72283	0.92	5.17851	0.033193	0.0270295	Rejected	Rejected
P08574	Cytochrome c1, heme protein, mitochondrial [OS=Homo sapiens]	8.39459	0.924	8.74809	22.4178	0.92	25.795	0.0354179	0.0270595	Rejected	Rejected
O43657	Tetraspanin-6 [OS=Homo sapiens]	2.96985	0.922	3.71305	3.39617	0.92	3.88128	0.0358689	0.0270896	Rejected	Rejected
Q96EE3-1	Isoform B of Nucleoporin SEH1 [OS=Homo sapiens]	1.00267	0.529	1.29503	10.4293	0.92	13.6385	0.0659952	0.0271197	Rejected	Rejected
Q9BQ75	Protein CMSS1 [OS=Homo sapiens]	0.880397	0.274	1.38405	2.95228	0.92	3.02062	0.0751353	0.0271497	Rejected	Rejected
Q13748-1	tubulin alpha-3C/D chain [OS=Homo sapiens]	4.63478	1	3.18619	2.13176	0.919	2.44119	0.00141311	0.0271798	Enriched	Rejected
O75083	WD repeat-containing protein 1 [OS=Homo sapiens]	29.5106	1	3.49559	10.8625	0.919	12.0602	0.00469032	0.0272099	Enriched	Rejected
Q56VL3	OCIA domain-containing protein 2 [OS=Homo sapiens]	0.867486	0.182	1.27772	10.5049	0.919	11.5764	0.0780818	0.0272399	Rejected	Rejected
Q9BVV7	Mitochondrial import inner membrane translocase subunit TIM21 [OS=Homo sapiens]	0.718852	0.072	1.4571	3.14288	0.919	3.37901	0.0824414	0.02727	Rejected	Rejected
P46108-1	Adapter molecule crk [OS=Homo sapiens]	2.57681	0.995	1.85004	2.15659	0.918	2.44072	0.0173181	0.0273001	Enriched	Rejected
P41223	Protein BUD31 homolog [OS=Homo sapiens]	3.48428	0.894	3.70168	3.52229	0.918	4.1419	0.039537	0.0273301	Rejected	Rejected
O15355	Protein phosphatase 1G [OS=Homo sapiens]	1.35298	0.688	2.50082	14.4635	0.918	19.6891	0.0569453	0.0273602	Rejected	Rejected
P30622-3	CAP-Gly domain-containing linker protein 1 [OS=Homo sapiens]	1.11988	0.655	1.64895	2.65757	0.918	2.84078	0.058659	0.0273903	Rejected	Rejected
P46939-2	Isoform 2 of Utrophin [OS=Homo sapiens]	5.43988	0.998	2.62691	3.32348	0.917	3.78	0.014071	0.0274203	Enriched	Rejected
Q8IWX8	Calcium homeostasis endoplasmic reticulum protein [OS=Homo sapiens]	1.10078	0.657	1.48022	1.58671	0.917	1.70928	0.0585689	0.0274504	Rejected	Rejected
Q96RT1-8	Isoform 8 of Erbin [OS=Homo sapiens]	1.17236	0.587	1.75743	2.1727	0.917	2.37958	0.0626578	0.0274805	Rejected	Rejected
Q9BVI4	Nucleolar complex protein 4 homolog [OS=Homo sapiens]	0.821266	0.226	1.54652	1.3504	0.917	1.41863	0.0767889	0.0275105	Rejected	Rejected
Q9UBC2-2	Isoform 2 of Epidermal growth factor receptor substrate 15-like 1 [OS=Homo sapiens]	1.95861	0.811	2.18171	1.84873	0.916	2.20166	0.0479254	0.0275406	Rejected	Rejected
Q7L1Q6-3	Isoform 3 of Basic leucine zipper and W2 domain-containing protein 1 [OS=Homo sapiens]	10.7008	1	2.63581	2.22381	0.915	2.55143	0.00619363	0.0275707	Enriched	Rejected
Q96CS3	FAS-associated factor 2 [OS=Homo sapiens]	14.1993	1	2.39336	3.47757	0.915	4.22485	0.0108539	0.0276007	Enriched	Rejected
P56589	Peroxisomal biogenesis factor 3 [OS=Homo sapiens]	3.47809	0.957	3.38607	1.97798	0.915	2.2145	0.0299459	0.0276308	Rejected	Rejected
P35250-1	Replication factor C subunit 2 [OS=Homo sapiens]	4.54535	0.952	4.54535	7.69061	0.915	11.561	0.0307276	0.0276609	Rejected	Rejected
Q9Y4Z0	U6 snRNA-associated Sm-like protein LSm4 [OS=Homo sapiens]	3.83422	0.716	4.48096	3.14025	0.915	3.30815	0.055442	0.0276909	Rejected	Rejected
P46379-3	Isoform 3 of Large proline-rich protein BAG6 [OS=Homo sapiens]	1.05349	0.622	1.39843	1.87388	0.915	2.03378	0.0607336	0.027721	Rejected	Rejected
Q99584	Protein S100-A13 [OS=Homo sapiens]	1.02585	0.546	1.32777	4.35199	0.915	4.73929	0.0650932	0.0277511	Rejected	Rejected
Q8WW59	SPRY domain-containing protein 4 [OS=Homo sapiens]	0.958598	0.43	1.77867	3.39979	0.915	3.71026	0.0707757	0.0277811	Rejected	Rejected
Q96AG4	Leucine-rich repeat-containing protein 59 [OS=Homo sapiens]	3.54936	0.969	2.89331	1.81956	0.914	2.06355	0.027721	0.0278112	Rejected	Rejected
Q9H6F5	Coiled-coil domain-containing protein 86 [OS=Homo sapiens]	3.32474	0.906	3.50036	2.96536	0.914	3.0124	0.0382441	0.0278413	Rejected	Rejected
Q15102	Platelet-activating factor acetylhydrolase IB subunit gamma [OS=Homo sapiens]	1.749	0.831	2.70849	2.30125	0.914	2.51285	0.0458509	0.0278713	Rejected	Rejected
O75643-1	U5 small nuclear ribonucleoprotein 200 kDa helicase [OS=Homo sapiens]	1.10618	0.598	2.1511	2.63369	0.914	2.83049	0.0620866	0.0279014	Rejected	Rejected
P09110-1	3-ketoacyl-CoA thiolase, peroxisomal [OS=Homo sapiens]	0.956492	0.475	1.55627	4.6919	0.914	5.03869	0.0689717	0.0279314	Rejected	Rejected
Q4G0J3-3	Isoform 3 of La-related protein 7 [OS=Homo sapiens]	6.65432	0.984	3.76932	3.52887	0.913	4.29588	0.0229405	0.0279615	Enriched	Rejected
Q9UNP9-3	Isoform 3 of Peptidyl-prolyl cis-trans isomerase E [OS=Homo sapiens]	0.802005	0.267	1.71839	1.46758	0.913	1.54958	0.0752856	0.0279916	Rejected	Rejected
O43684	Mitotic checkpoint protein BUB3 [OS=Homo sapiens]	7.98229	0.969	5.96249	2.19853	0.912	2.50742	0.0277511	0.0280216	Rejected	Rejected
P38646	Stress-70 protein, mitochondrial [OS=Homo sapiens]	4.99054	0.992	2.93363	2.32307	0.911	2.66118	0.0193927	0.0280517	Enriched	Rejected
P31350-2	Isoform 2 of Ribonucleoside-diphosphate reductase subunit M2 [OS=Homo sapiens]	2.95688	0.94	3.07903	15.3103	0.911	18.2172	0.0326819	0.0280818	Rejected	Rejected
Q6PL18-1	ATPase family AAA domain-containing protein 2 [OS=Homo sapiens]	47.1708	0.888	48.8982	2.1292	0.911	2.35604	0.0402285	0.0281118	Rejected	Rejected
Q6PJT7-1	Zinc finger CCCH domain-containing protein 14 [OS=Homo sapiens]	5.19478	0.733	13.802	2.50472	0.911	3.73042	0.054089	0.0281419	Rejected	Rejected
O14880	Microsomal glutathione S-transferase 3 [OS=Homo sapiens]	0.819389	0.25	1.61282	3.80309	0.911	3.96639	0.0759771	0.028172	Rejected	Rejected
Q5TFE4	5'-nucleotidase domain-containing protein 1 [OS=Homo sapiens]	62.4519	0.967	61.2792	5.83044	0.91	6.32761	0.0282922	0.028202	Rejected	Rejected
P55795	heterogeneous nuclear ribonucleoprotein H2 [OS=Homo sapiens]	2.75892	0.867	3.39564	2.3942	0.91	2.89163	0.0421527	0.0282321	Rejected	Rejected
O75964	ATP synthase subunit g, mitochondrial [OS=Homo sapiens]	1.3644	0.665	1.88215	2.0075	0.91	2.17825	0.0580577	0.0282622	Rejected	Rejected
Q6UX04	Peptidyl-prolyl cis-trans isomerase CWC27 homolog [OS=Homo sapiens]	0.715072	0.055	1.43596	3.56759	0.91	3.83312	0.0830126	0.0282922	Rejected	Rejected
Q6P1Q9-1	Methyltransferase-like protein 2B [OS=Homo sapiens]	0.670695	0.047	1.45457	1.32019	0.91	1.42121	0.0833734	0.0283223	Rejected	Rejected
P15924-1	Desmoplakin [OS=Homo sapiens]	5.39569	1	2.41689	1.51507	0.909	1.81532	0.000450992	0.0283524	Enriched	Rejected
Q9Y4E8	ubiquitin carboxyl-terminal hydrolase 15 [OS=Homo sapiens]	4.06904	0.913	4.41482	1.6536	0.909	1.68783	0.0372219	0.0283824	Rejected	Rejected
O15498	Synaptobrevin homolog YKT6 [OS=Homo sapiens]	1.43009	0.889	1.62732	1.57284	0.909	1.71681	0.0399579	0.0284125	Rejected	Rejected
Q9H4A4	aminopeptidase B [OS=Homo sapiens]	2.50399	0.999	1.80853	2.14463	0.908	2.9291	0.0126879	0.0284426	Enriched	Rejected
Q15654-1	thyroid receptor-interacting protein 6 [OS=Homo sapiens]	4.8204	0.977	4.46326	2.50514	0.908	2.70359	0.0252556	0.0284726	Enriched	Rejected
P39019	40S ribosomal protein S19 [OS=Homo sapiens]	2.3676	0.944	2.37917	2.15391	0.908	2.37345	0.0322309	0.0285027	Rejected	Rejected
Q13625-3	Isoform 3 of Apoptosis-stimulating of p53 protein 2 [OS=Homo sapiens]	1.53484	0.926	1.60131	2.95495	0.908	3.04313	0.0349068	0.0285328	Rejected	Rejected
Q96B97-1	SH3 domain-containing kinase-binding protein 1 [OS=Homo sapiens]	4.1627	0.89	5.31777	1.30027	0.908	1.36283	0.0397775	0.0285628	Rejected	Rejected
P61970	nuclear transport factor 2 [OS=Homo sapiens]	5.47585	0.999	2.44836	1.75623	0.907	2.19406	0.0135298	0.0285929	Enriched	Rejected
P14868	Aspartate--tRNA ligase, cytoplasmic [OS=Homo sapiens]	4.48942	0.998	2.29407	41.4831	0.907	70.4397	0.0137402	0.028623	Enriched	Rejected
P48637	glutathione synthetase [OS=Homo sapiens]	311.559	0.991	177.439	3.5359	0.907	3.90995	0.0203548	0.028653	Enriched	Rejected
P23919	thymidylate kinase [OS=Homo sapiens]	0.709687	0.201	1.86169	2.20267	0.907	2.75818	0.0776308	0.0286831	Rejected	Rejected
Q92621	Nuclear pore complex protein Nup205 [OS=Homo sapiens]	2.38225	0.95	2.38257	7.65358	0.906	32.2805	0.0312688	0.0287132	Rejected	Rejected
Q01581	hydroxymethylglutaryl-CoA synthase, cytoplasmic [OS=Homo sapiens]	2.66694	0.998	2.06518	2.12351	0.905	4.89598	0.0138304	0.0287432	Enriched	Rejected
O95400	CD2 antigen cytoplasmic tail-binding protein 2 [OS=Homo sapiens]	0.889363	0.353	1.48189	3.26994	0.905	3.61492	0.0727601	0.0287733	Rejected	Rejected
Q15126	phosphomevalonate kinase [OS=Homo sapiens]	9.38838	1	3.40175	2.27952	0.904	2.61958	0.0115153	0.0288034	Enriched	Rejected
Q9HC38-2	Isoform 2 of Glyoxalase domain-containing protein 4 [OS=Homo sapiens]	12.2218	0.997	6.37328	2.80472	0.904	3.58366	0.0153939	0.0288334	Enriched	Rejected
P60468	protein transport protein Sec61 subunit beta [OS=Homo sapiens]	1.11692	0.609	1.88911	1.65018	0.904	1.95445	0.0615153	0.0288635	Rejected	Rejected
Q49A26-1	Putative oxidoreductase GLYR1 [OS=Homo sapiens]	0.63778	0.097	1.69146	1.41877	0.904	1.54721	0.0812989	0.0288936	Rejected	Rejected
Q92616	eIF-2-alpha kinase activator GCN1 [OS=Homo sapiens]	86.8633	1	12.8045	3.00266	0.903	3.64691	0.000901984	0.0289236	Enriched	Rejected
P54578	Ubiquitin carboxyl-terminal hydrolase 14 [OS=Homo sapiens]	6.07055	1	2.87395	2.42609	0.903	2.95975	0.00607336	0.0289537	Enriched	Rejected
P51991-1	Heterogeneous nuclear ribonucleoprotein A3 [OS=Homo sapiens]	0.804685	0.282	1.78386	1.63793	0.903	1.8967	0.0748346	0.0289838	Rejected	Rejected
Q99808-2	Isoform 2 of Equilibrative nucleoside transporter 1 [OS=Homo sapiens]	2.12478	0.885	2.23233	5.45111	0.901	5.7989	0.0406194	0.0290138	Rejected	Rejected
Q01082-1	Spectrin beta chain, non-erythrocytic 1 [OS=Homo sapiens]	1.60558	0.806	1.97914	2.51861	0.901	3.85586	0.0484065	0.0290439	Rejected	Rejected
Q9UDT6-1	CAP-Gly domain-containing linker protein 2 [OS=Homo sapiens]	1.46071	0.766	2.30318	7.27262	0.901	8.59613	0.0519844	0.029074	Rejected	Rejected
Q9BRQ8-1	Apoptosis-inducing factor 2 [OS=Homo sapiens]	0.980223	0.475	1.47047	1.62913	0.901	1.85177	0.0689417	0.029104	Rejected	Rejected
Q9UDY4	DnaJ homolog subfamily B member 4 [OS=Homo sapiens]	0.593729	0.077	1.80372	1.53215	0.901	1.67315	0.0823211	0.0291341	Rejected	Rejected
O00303	Eukaryotic translation initiation factor 3 subunit F [OS=Homo sapiens]	6.03294	0.996	4.02224	1.73842	0.9	2.02867	0.0159651	0.0291642	Enriched	Rejected
P25398	40S ribosomal protein S12 [OS=Homo sapiens]	2.3439	0.847	3.60501	1.92585	0.9	2.52811	0.0442574	0.0291942	Rejected	Rejected
Q9NUJ3	T-complex protein 11-like protein 1 [OS=Homo sapiens]	1.18362	0.607	2.05739	11.5675	0.9	15.3125	0.0616055	0.0292243	Rejected	Rejected
Q86Y37	CDK2-associated and cullin domain-containing protein 1 [OS=Homo sapiens]	0.811499	0.17	1.31694	1.54695	0.9	1.7748	0.0784426	0.0292544	Rejected	Rejected
Q9GZR2-1	RNA exonuclease 4 [OS=Homo sapiens]	1.57907	0.928	1.63501	2.83119	0.899	3.05099	0.0346362	0.0292844	Rejected	Rejected
P24844-1	Myosin regulatory light polypeptide 9 [OS=Homo sapiens]	2.10304	0.877	2.42882	2.15923	0.899	2.37649	0.0412508	0.0293145	Rejected	Rejected
Q9H9Q2	COP9 signalosome complex subunit 7b [OS=Homo sapiens]	1.14903	0.792	1.33447	8.59911	0.899	9.20249	0.0494889	0.0293446	Rejected	Rejected
O00422	Histone deacetylase complex subunit SAP18 [OS=Homo sapiens]	1.06631	0.701	1.24543	1.2186	0.899	1.24422	0.0561936	0.0293746	Rejected	Rejected
Q15398-3	Isoform 3 of Disks large-associated protein 5 [OS=Homo sapiens]	1.20994	0.677	1.7232	4.86867	0.899	5.47093	0.0575165	0.0294047	Rejected	Rejected
Q9NVH0	Exonuclease 3'-5' domain-containing protein 2 [OS=Homo sapiens]	0.91097	0.322	1.39646	15.566	0.899	16.8515	0.0735418	0.0294348	Rejected	Rejected
Q9UEE9-1	Craniofacial development protein 1 [OS=Homo sapiens]	0.814101	0.048	1.20524	1.42121	0.899	1.51106	0.0833133	0.0294648	Rejected	Rejected
P14209	CD99 antigen [OS=Homo sapiens]	0.867639	0.245	1.39083	1.99544	0.898	2.1025	0.0761876	0.0294949	Rejected	Rejected
Q15365	Poly(RC)-binding protein 1 [OS=Homo sapiens]	4.691	1	2.53827	1.53799	0.897	1.68386	0.00273602	0.029525	Enriched	Rejected
P23381	Tryptophan--tRNA ligase, cytoplasmic [OS=Homo sapiens]	2.53723	0.804	2.92094	29.4087	0.897	46.2243	0.0484666	0.029555	Rejected	Rejected
O43670-4	Isoform 4 of BUB3-interacting and GLEBS motif-containing protein ZNF207 [OS=Homo sapiens]	11.4895	0.79	12.6539	2.95328	0.897	3.41995	0.0498196	0.0295851	Rejected	Rejected
Q00325-2	Isoform B of Phosphate carrier protein, mitochondrial [OS=Homo sapiens]	57.1827	0.997	34.2112	2.58725	0.896	3.21732	0.0152135	0.0296152	Enriched	Rejected
P85037-1	Forkhead box protein K1 [OS=Homo sapiens]	3.39117	0.877	3.75588	6.7526	0.895	7.15324	0.0413109	0.0296452	Rejected	Rejected
Q6WKZ4-4	Rab11 family-interacting protein 1 [OS=Homo sapiens]	1.05122	0.569	1.66737	1.34803	0.895	1.45786	0.0636801	0.0296753	Rejected	Rejected
P30041	Peroxiredoxin-6 [OS=Homo sapiens]	3.60418	1	1.89264	3.65372	0.894	6.34802	0.00466025	0.0297054	Enriched	Rejected
P60866-2	Isoform 2 of 40S ribosomal protein S20 [OS=Homo sapiens]	6.52894	1	2.36414	2.06672	0.894	2.55004	0.00935057	0.0297354	Enriched	Rejected
P07099	epoxide hydrolase 1 [OS=Homo sapiens]	34.6367	1	9.18769	13.4169	0.894	15.1971	0.0107035	0.0297655	Enriched	Rejected
Q92688	Acidic leucine-rich nuclear phosphoprotein 32 family member B [OS=Homo sapiens]	3.55933	0.995	2.31849	2.14868	0.894	2.55732	0.0167468	0.0297956	Enriched	Rejected
Q9NPD3	Exosome complex component Rrp41 [OS=Homo sapiens]	4.24365	0.952	4.23002	4.23391	0.894	7.22618	0.0307577	0.0298256	Rejected	Rejected
P53004	Biliverdin reductase A [OS=Homo sapiens]	13.5905	0.997	5.94843	2.68312	0.893	3.77017	0.0153638	0.0298557	Enriched	Rejected
P05198	Eukaryotic translation initiation factor 2 subunit 1 [OS=Homo sapiens]	12.442	0.993	3.16148	1.74992	0.893	2.01569	0.0185508	0.0298857	Enriched	Rejected
Q9NW13-1	RNA-binding protein 28 [OS=Homo sapiens]	1.38498	0.948	1.38959	4.33465	0.893	5.9622	0.0316597	0.0299158	Rejected	Rejected
Q8TCT9-1	Minor histocompatibility antigen H13 [OS=Homo sapiens]	3.78726	0.924	4.97426	4.02209	0.893	7.99224	0.0353578	0.0299459	Rejected	Rejected
O15118	Niemann-Pick C1 protein [OS=Homo sapiens]	1.45443	0.923	1.56057	1.42305	0.893	1.56724	0.0357486	0.0299759	Rejected	Rejected
O60256-1	Phosphoribosyl pyrophosphate synthase-associated protein 2 [OS=Homo sapiens]	1.2805	0.708	1.50767	1.50782	0.892	1.7169	0.0558028	0.030006	Rejected	Rejected
Q29RF7-1	Sister chromatid cohesion protein PDS5 homolog A [OS=Homo sapiens]	2.13168	0.602	3.07284	7.13749	0.892	7.71112	0.0618461	0.0300361	Rejected	Rejected
O75367-1	Core histone macro-H2A.1 [OS=Homo sapiens]	2.71755	0.927	2.87561	2.33124	0.891	3.15589	0.0346963	0.0300661	Rejected	Rejected
Q9BVL2	Nucleoporin p58/p45 [OS=Homo sapiens]	1.14049	0.744	1.34105	1.30586	0.891	1.44839	0.0534576	0.0300962	Rejected	Rejected
Q14019	coactosin-like protein [OS=Homo sapiens]	1.78742	0.536	3.71809	3.36177	0.891	4.32482	0.0656344	0.0301263	Rejected	Rejected
P35268	60S ribosomal protein L22 [OS=Homo sapiens]	2.4104	1	1.68577	1.46065	0.89	1.68076	0.00898978	0.0301563	Enriched	Rejected
Q6PKG0-1	La-related protein 1 [OS=Homo sapiens]	2.88454	0.964	2.61223	1.67942	0.89	1.98979	0.0288635	0.0301864	Rejected	Rejected
Q9Y5M8	signal recognition particle receptor subunit beta [OS=Homo sapiens]	3.36653	0.904	3.68071	2.2734	0.89	2.35881	0.0385448	0.0302165	Rejected	Rejected
P05109	Protein S100-A8 [OS=Homo sapiens]	3.44522	1	1.83447	5.1818	0.889	6.05165	0.00992183	0.0302465	Enriched	Rejected
Q13740-1	CD166 antigen [OS=Homo sapiens]	1.93518	0.97	1.8089	2.08185	0.889	2.48709	0.0275406	0.0302766	Rejected	Rejected
Q9P287	BRCA2 and CDKN1A-interacting protein [OS=Homo sapiens]	2.81555	0.798	3.39871	3.38739	0.889	3.70113	0.0489778	0.0303067	Rejected	Rejected
P23396-1	40S ribosomal protein S3 [OS=Homo sapiens]	15.3709	1	3.09208	2.02686	0.888	2.48911	0.00496091	0.0303367	Enriched	Rejected
O43592	Exportin-T [OS=Homo sapiens]	3.73076	0.782	4.84116	3.66295	0.888	4.55902	0.0505111	0.0303668	Rejected	Rejected
Q15046-2	Isoform Mitochondrial of Lysine--tRNA ligase [OS=Homo sapiens]	3.60716	0.974	3.41124	1.81118	0.887	2.1131	0.025887	0.0303969	Rejected	Rejected
Q8N163-1	Cell cycle and apoptosis regulator protein 2 [OS=Homo sapiens]	4.32668	0.967	3.96686	3.52111	0.887	5.82845	0.0281419	0.0304269	Rejected	Rejected
P19623	spermidine synthase [OS=Homo sapiens]	2.28478	0.879	2.5133	6.24635	0.887	6.81331	0.0411004	0.030457	Rejected	Rejected
Q12846	Syntaxin-4 [OS=Homo sapiens]	1.4462	0.857	1.59393	1.46798	0.887	1.66124	0.0432351	0.0304871	Rejected	Rejected
Q9BTZ2	dehydrogenase/reductase sdr family member 4 [OS=Homo sapiens]	0.842109	0.215	1.41485	4.5662	0.887	5.24246	0.0772099	0.0305171	Rejected	Rejected
P48739-3	Isoform 3 of Phosphatidylinositol transfer protein beta isoform [OS=Homo sapiens]	2.18947	0.96	2.10613	3.8366	0.886	5.04389	0.0293746	0.0305472	Rejected	Rejected
Q9Y5X2	Sorting nexin-8 [OS=Homo sapiens]	1.32765	0.774	1.72853	3.08547	0.886	6.66144	0.051383	0.0305773	Rejected	Rejected
Q92783	signal transducing adapter molecule 1 [OS=Homo sapiens]	5.04914	0.997	2.36177	9.04746	0.885	10.3907	0.0155442	0.0306073	Enriched	Rejected
Q9H0U4	ras-related protein Rab-1B [OS=Homo sapiens]	10.232	1	2.94654	2.54989	0.884	3.43185	0.00598316	0.0306374	Enriched	Rejected
P48444	Coatomer subunit delta [OS=Homo sapiens]	2.73125	0.983	2.28975	2.32032	0.884	2.88098	0.0232712	0.0306675	Enriched	Rejected
Q9NQ88	Fructose-2,6-bisphosphatase TIGAR [OS=Homo sapiens]	1.25261	0.949	1.25692	1.26171	0.884	1.33781	0.0315093	0.0306975	Rejected	Rejected
P10316	HLA class I histocompatibility antigen, A-69 alpha chain [OS=Homo sapiens]	2.146	0.931	2.23119	2.04856	0.884	2.59822	0.0339146	0.0307276	Rejected	Rejected
O75489	NADH dehydrogenase [ubiquinone] iron-sulfur protein 3, mitochondrial [OS=Homo sapiens]	3.09396	0.919	3.15671	4.16972	0.884	5.46798	0.0362297	0.0307577	Rejected	Rejected
P35613	Basigin [OS=Homo sapiens]	1.07956	0.658	1.35349	3.14395	0.884	3.40143	0.0583584	0.0307877	Rejected	Rejected
Q9UKD2	mRNA turnover protein 4 homolog [OS=Homo sapiens]	4.90633	1	2.4997	6.46072	0.883	7.89778	0.0105833	0.0308178	Enriched	Rejected
Q9UBQ0-2	Isoform 2 of Vacuolar protein sorting-associated protein 29 [OS=Homo sapiens]	4.39588	0.999	3.46396	4.01226	0.883	4.58707	0.0130788	0.0308479	Enriched	Rejected
P46926	glucosamine-6-phosphate isomerase 1 [OS=Homo sapiens]	4.94319	0.987	3.19439	2.48711	0.883	3.50785	0.0221587	0.0308779	Enriched	Rejected
O14828	Secretory carrier-associated membrane protein 3 [OS=Homo sapiens]	1.9256	0.907	2.1158	1.231	0.883	1.31968	0.0380938	0.030908	Rejected	Rejected
P52630-3	signal transducer and activator of transcription 2 [OS=Homo sapiens]	1.19606	0.735	1.59505	1.287	0.883	1.38445	0.0539387	0.0309381	Rejected	Rejected
P55265-4	Isoform 4 of Double-stranded RNA-specific adenosine deaminase [OS=Homo sapiens]	10.0677	0.99	3.12059	2.12383	0.882	3.57356	0.0205953	0.0309681	Enriched	Rejected
P25311	Zinc-alpha-2-glycoprotein [OS=Homo sapiens]	2.48608	0.988	2.04216	2.05523	0.882	3.01255	0.0215574	0.0309982	Enriched	Rejected
Q96R06	Sperm-associated antigen 5 [OS=Homo sapiens]	4.17614	0.978	3.61322	2.85449	0.882	4.22495	0.0248346	0.0310283	Enriched	Rejected
P08621-1	U1 small nuclear ribonucleoprotein 70 kDa [OS=Homo sapiens]	2.77013	0.746	3.5104	1.76537	0.882	2.10721	0.0532471	0.0310583	Rejected	Rejected
Q08188	Protein-glutamine gamma-glutamyltransferase E [OS=Homo sapiens]	4.36694	1	2.21402	1.79183	0.881	2.01563	0.00658449	0.0310884	Enriched	Rejected
O60610-1	Protein diaphanous homolog 1 [OS=Homo sapiens]	3.23744	0.995	1.90054	6.49549	0.881	8.16911	0.0166566	0.0311185	Enriched	Rejected
P68402-1	platelet-activating factor acetylhydrolase IB subunit beta [OS=Homo sapiens]	0.790968	0.16	1.42839	7.88019	0.881	14.8106	0.0789236	0.0311485	Rejected	Rejected
Q9BWU0	kanadaptin [OS=Homo sapiens]	2.79527	0.784	3.80734	19.5212	0.879	20.9091	0.0503307	0.0311786	Rejected	Rejected
P30086	phosphatidylethanolamine-binding protein 1 [OS=Homo sapiens]	1.95294	0.685	3.69608	3.36152	0.879	4.51765	0.0570655	0.0312087	Rejected	Rejected
O95470	sphingosine-1-phosphate lyase 1 [OS=Homo sapiens]	0.811859	0.295	1.70439	1.46591	0.879	1.68684	0.0742934	0.0312387	Rejected	Rejected
P33947-1	ER lumen protein-retaining receptor 2 [OS=Homo sapiens]	2.644	0.981	1.96521	1.49448	0.878	1.80549	0.0240229	0.0312688	Enriched	Rejected
P14923	Junction plakoglobin [OS=Homo sapiens]	4.5489	1	2.18635	1.6629	0.877	2.32423	0.00234516	0.0312989	Enriched	Rejected
Q16555-1	Dihydropyrimidinase-related protein 2 [OS=Homo sapiens]	2.73818	0.952	2.71774	2.31103	0.877	3.79055	0.0306975	0.0313289	Rejected	Rejected
Q9NTI5	Sister chromatid cohesion protein PDS5 homolog B [OS=Homo sapiens]	1.23004	0.917	1.2759	1.77586	0.877	2.04862	0.0365003	0.031359	Rejected	Rejected
Q9Y520-7	Isoform 7 of Protein PRRC2C [OS=Homo sapiens]	9.31009	0.814	10.8958	4.2869	0.877	6.55694	0.047715	0.0313891	Rejected	Rejected
Q8N6H7	ADP-ribosylation factor GTPase-activating protein 2 [OS=Homo sapiens]	0.916431	0.323	1.37823	1.16846	0.877	1.23095	0.0735117	0.0314191	Rejected	Rejected
Q9UN86	Ras GTPase-activating protein-binding protein 2 [OS=Homo sapiens]	1.68593	0.833	2.16547	3.69284	0.876	4.78491	0.0455201	0.0314492	Rejected	Rejected
Q16270-1	Insulin-like growth factor-binding protein 7 [OS=Homo sapiens]	1.23677	0.833	1.43245	1.51593	0.876	1.86703	0.0455502	0.0314793	Rejected	Rejected
P49406	39S ribosomal protein L19, mitochondrial [OS=Homo sapiens]	0.985929	0.457	1.40856	1.29487	0.876	1.49122	0.0696933	0.0315093	Rejected	Rejected
Q7Z460-1	CLIP-associating protein 1 [OS=Homo sapiens]	0.802655	0.17	1.46786	4.27417	0.876	4.68444	0.0784125	0.0315394	Rejected	Rejected
Q9NSK0-3	Isoform 3 of Kinesin light chain 4 [OS=Homo sapiens]	0.710403	0.083	1.40813	1.20836	0.876	1.31034	0.0819603	0.0315695	Rejected	Rejected
Q96PU8	protein quaking [OS=Homo sapiens]	0.435989	0.007	1.77419	2.03862	0.876	2.29089	0.0855382	0.0315995	Rejected	Rejected
Q08554-1	Desmocollin-1 [OS=Homo sapiens]	5.43102	1	2.13335	1.32874	0.875	1.46702	0.00601323	0.0316296	Enriched	Rejected
Q15291-1	Retinoblastoma-binding protein 5 [OS=Homo sapiens]	1.6982	1	1.52971	25.2303	0.875	35.5038	0.0116356	0.0316597	Enriched	Rejected
Q53F19	Nuclear cap-binding protein subunit 3 [OS=Homo sapiens]	1.00512	0.516	1.48134	1.18774	0.875	1.29259	0.0669874	0.0316897	Rejected	Rejected
O95239-1	Chromosome-associated kinesin KIF4A [OS=Homo sapiens]	0.920338	0.392	1.67793	2.01948	0.875	2.45762	0.0716476	0.0317198	Rejected	Rejected
Q8NEW0	Zinc transporter 7 [OS=Homo sapiens]	0.673129	0.03	1.43011	1.32548	0.874	1.45968	0.0841251	0.0317498	Rejected	Rejected
P25787	Proteasome subunit alpha type-2 [OS=Homo sapiens]	7.38089	0.978	4.7815	7.85553	0.873	9.79755	0.0248046	0.0317799	Enriched	Rejected
P52701	DNA mismatch repair protein MSH6 [OS=Homo sapiens]	2.10672	0.956	2.04746	1.73465	0.872	1.98575	0.030006	0.03181	Rejected	Rejected
Q9H3P7	Golgi resident protein GCP60 [OS=Homo sapiens]	1.69845	0.699	3.06534	1.77761	0.872	2.30184	0.0562838	0.03184	Rejected	Rejected
Q14696	LDLR chaperone MESD [OS=Homo sapiens]	3.45354	0.986	2.69919	1.51758	0.871	1.80195	0.0226097	0.0318701	Enriched	Rejected
Q8IWJ2	GRIP and coiled-coil domain-containing protein 2 [OS=Homo sapiens]	1.34797	0.868	1.55187	1.12335	0.871	1.18219	0.0421227	0.0319002	Rejected	Rejected
Q15018	BRISC complex subunit Abraxas 2 [OS=Homo sapiens]	1.03988	0.535	1.51549	1.25516	0.871	1.37979	0.0657246	0.0319302	Rejected	Rejected
Q9H7B2	Ribosome production factor 2 homolog [OS=Homo sapiens]	0.831305	0.189	1.35663	25.8619	0.871	28.0892	0.0779314	0.0319603	Rejected	Rejected
Q92925-1	SWI/SNF-related matrix-associated actin-dependent regulator of chromatin subfamily D member 2 [OS=Homo sapiens]	0.748187	0.08	1.42253	1.29053	0.871	1.45905	0.0822008	0.0319904	Rejected	Rejected
P35241-5	Isoform 5 of Radixin [OS=Homo sapiens]	8.56148	1	3.09021	2.96035	0.87	4.92538	0.00225496	0.0320204	Enriched	Rejected
O60701	UDP-glucose 6-dehydrogenase [OS=Homo sapiens]	4.09744	0.995	2.42035	1.73394	0.87	2.22059	0.0169874	0.0320505	Enriched	Rejected
Q96GG9	DCN1-like protein 1 [OS=Homo sapiens]	1.81623	0.929	1.88959	2.865	0.87	3.77047	0.0343656	0.0320806	Rejected	Rejected
P04839	Cytochrome b-245 heavy chain [OS=Homo sapiens]	2.11509	0.926	2.19312	2.06775	0.869	6.32275	0.0349369	0.0321106	Rejected	Rejected
Q5T653	39S ribosomal protein L2, mitochondrial [OS=Homo sapiens]	3.1953	0.811	3.77175	2.1638	0.869	2.34206	0.0479856	0.0321407	Rejected	Rejected
P42566-1	epidermal growth factor receptor substrate 15 [OS=Homo sapiens]	0.912819	0.472	2.61885	8.07225	0.869	9.52549	0.069092	0.0321708	Rejected	Rejected
O00410-3	Isoform 3 of Importin-5 [OS=Homo sapiens]	3.77542	0.956	3.63793	2.59487	0.868	3.27319	0.0299759	0.0322008	Rejected	Rejected
P43897	Elongation factor Ts, mitochondrial [OS=Homo sapiens]	10.4249	0.913	11.068	3.47068	0.868	3.7929	0.0371918	0.0322309	Rejected	Rejected
Q16891	MICOS complex subunit Mic60 [OS=Homo sapiens]	8.91549	0.829	10.5238	3.24849	0.868	4.18459	0.0460012	0.032261	Rejected	Rejected
Q16763	ubiquitin-conjugating enzyme E2 S [OS=Homo sapiens]	3.51905	0.755	12.1647	2.7752	0.868	3.56738	0.0526759	0.032291	Rejected	Rejected
P51784	Ubiquitin carboxyl-terminal hydrolase 11 [OS=Homo sapiens]	0.702599	0.15	1.54555	1.18414	0.868	1.28093	0.0793746	0.0323211	Rejected	Rejected
P18206	Vinculin [OS=Homo sapiens]	5.45492	1	2.38204	1.80022	0.867	2.26783	0.00129284	0.0323512	Enriched	Rejected
O60488-1	Long-chain-fatty-acid--CoA ligase 4 [OS=Homo sapiens]	8.88234	1	3.89482	3.51129	0.867	7.15261	0.00808779	0.0323812	Enriched	Rejected
Q12906-7	Isoform 7 of Interleukin enhancer-binding factor 3 [OS=Homo sapiens]	5.35085	0.98	2.74814	5.60392	0.867	7.09226	0.0241431	0.0324113	Enriched	Rejected
Q96TC7	Regulator of microtubule dynamics protein 3 [OS=Homo sapiens]	3.04001	0.967	3.00015	163.438	0.867	183.847	0.0283524	0.0324414	Rejected	Rejected
O43660-1	Pleiotropic regulator 1 [OS=Homo sapiens]	1.30002	0.96	1.279	1.23441	0.867	1.32301	0.0294648	0.0324714	Rejected	Rejected
Q9HD45	Transmembrane 9 superfamily member 3 [OS=Homo sapiens]	4.2683	0.998	2.15306	4.7437	0.866	5.93364	0.0142814	0.0325015	Enriched	Rejected
P63208	s-phase kinase-associated protein 1 [OS=Homo sapiens]	2.63492	0.95	2.63533	1.49302	0.866	1.71473	0.0312087	0.0325316	Rejected	Rejected
Q53H96	Pyrroline-5-carboxylate reductase 3 [OS=Homo sapiens]	6.08144	0.999	3.28692	1.69447	0.865	1.9107	0.013169	0.0325616	Enriched	Rejected
Q8WUK0	Phosphatidylglycerophosphatase and protein-tyrosine phosphatase 1 [OS=Homo sapiens]	0.893984	0.324	1.47691	1.11424	0.865	1.18331	0.0734817	0.0325917	Rejected	Rejected
P83111-1	Serine beta-lactamase-like protein LACTB, mitochondrial [OS=Homo sapiens]	1.25398	0.975	1.21512	46.1134	0.864	48.5086	0.0257366	0.0326218	Enriched	Rejected
P61158	actin-related protein 3 [OS=Homo sapiens]	2.02529	0.87	2.35722	3.03155	0.864	7.08739	0.0420024	0.0326518	Rejected	Rejected
P10606	Cytochrome c oxidase subunit 5B, mitochondrial [OS=Homo sapiens]	2.80378	0.838	3.17585	3.23053	0.864	3.59205	0.0451293	0.0326819	Rejected	Rejected
Q9NZL9	Methionine adenosyltransferase 2 subunit beta [OS=Homo sapiens]	1.19073	0.68	1.58025	1.28082	0.864	1.37358	0.0573963	0.032712	Rejected	Rejected
O95831-1	Apoptosis-inducing factor 1, mitochondrial [OS=Homo sapiens]	0.987223	0.446	3.29298	9.60002	0.864	11.357	0.0700241	0.032742	Rejected	Rejected
Q92945	Far upstream element-binding protein 2 [OS=Homo sapiens]	4.73511	0.966	4.41076	2.5991	0.863	3.55908	0.0284125	0.0327721	Rejected	Rejected
Q96K21	Abscission/NoCut checkpoint regulator [OS=Homo sapiens]	0.913819	0.363	1.44213	1.39483	0.863	1.61802	0.0725195	0.0328022	Rejected	Rejected
P04150-3	Isoform Alpha-2 of Glucocorticoid receptor [OS=Homo sapiens]	0.942367	0.286	1.19022	1.20391	0.863	1.30284	0.0746542	0.0328322	Rejected	Rejected
P21291	Cysteine and glycine-rich protein 1 [OS=Homo sapiens]	0.705013	0.098	1.5217	4.34769	0.863	4.81286	0.0810884	0.0328623	Rejected	Rejected
P98175-1	RNA-binding protein 10 [OS=Homo sapiens]	1.75921	0.929	1.84508	1.57714	0.862	1.81948	0.0343355	0.0328924	Rejected	Rejected
Q06210-1	glutamine--fructose-6-phosphate aminotransferase [isomerizing] 1 [OS=Homo sapiens]	12.6542	1	2.63226	3.0691	0.861	4.36532	0.00303668	0.0329224	Enriched	Rejected
Q01105	Protein SET [OS=Homo sapiens]	1.05843	0.578	1.43488	1.22958	0.861	1.35855	0.0632291	0.0329525	Rejected	Rejected
Q9H9H4	Vacuolar protein sorting-associated protein 37B [OS=Homo sapiens]	0.999541	0.488	1.56937	1.27958	0.861	1.4227	0.0683103	0.0329826	Rejected	Rejected
Q9Y230	RuvB-like 2 [OS=Homo sapiens]	10.7422	1	3.28908	3.74887	0.859	5.83351	0.00396873	0.0330126	Enriched	Rejected
P55786	puromycin-sensitive aminopeptidase [OS=Homo sapiens]	6.81276	0.994	3.85962	2.0969	0.859	3.18708	0.0175586	0.0330427	Enriched	Rejected
O75340	programmed cell death protein 6 [OS=Homo sapiens]	5.59029	0.969	5.34052	8.98715	0.859	10.4502	0.0278413	0.0330728	Rejected	Rejected
P13804-1	Electron transfer flavoprotein subunit alpha, mitochondrial [OS=Homo sapiens]	4.40494	0.876	4.97467	2.58892	0.859	5.08258	0.041341	0.0331028	Rejected	Rejected
Q8NFH4	Nucleoporin Nup37 [OS=Homo sapiens]	2.21385	0.791	3.03324	2.34707	0.859	2.58283	0.0496392	0.0331329	Rejected	Rejected
Q96I99-1	Succinate--CoA ligase [GDP-forming] subunit beta, mitochondrial [OS=Homo sapiens]	0.6962	0.06	1.44776	2.14574	0.859	3.22024	0.0828623	0.033163	Rejected	Rejected
Q16706	Alpha-mannosidase 2 [OS=Homo sapiens]	5.45135	0.982	5.31193	4.39164	0.858	4.87308	0.0237823	0.033193	Enriched	Rejected
P37837	Transaldolase [OS=Homo sapiens]	1.6363	0.906	1.80132	1.86057	0.858	2.75609	0.038184	0.0332231	Rejected	Rejected
P15927-3	Isoform 3 of Replication protein A 32 kDa subunit [OS=Homo sapiens]	1.32379	0.856	1.47512	3.16451	0.858	3.49914	0.0433554	0.0332532	Rejected	Rejected
P24928	DNA-directed RNA polymerase II subunit RPB1 [OS=Homo sapiens]	1.5729	0.599	2.04227	3.97596	0.858	4.70843	0.0620265	0.0332832	Rejected	Rejected
Q9H9J2	39S ribosomal protein L44, mitochondrial [OS=Homo sapiens]	0.712755	0.348	1.7369	1.28944	0.858	1.50213	0.0729405	0.0333133	Rejected	Rejected
O76003	glutaredoxin-3 [OS=Homo sapiens]	6.56229	0.989	5.00011	1.8422	0.857	2.52846	0.0211365	0.0333434	Enriched	Rejected
Q9Y496	kinesin-like protein KIF3A [OS=Homo sapiens]	1.2254	0.855	1.34705	1.76923	0.857	2.11528	0.0435057	0.0333734	Rejected	Rejected
P53814-6	Isoform B3 of Smoothelin [OS=Homo sapiens]	0.723717	0.083	1.44806	1.22275	0.857	1.36423	0.0819904	0.0334035	Rejected	Rejected
P67936	Tropomyosin alpha-4 chain [OS=Homo sapiens]	0.214911	0.019	4.0084	1.76169	0.857	2.33262	0.0848166	0.0334336	Rejected	Rejected
P25786-2	Isoform Long of Proteasome subunit alpha type-1 [OS=Homo sapiens]	11.9079	1	3.40768	1.852	0.856	2.38458	0.00592303	0.0334636	Enriched	Rejected
O95379-4	Isoform 4 of Tumor necrosis factor alpha-induced protein 8 [OS=Homo sapiens]	1.436	0.864	1.68135	1.64257	0.856	3.06099	0.0425436	0.0334937	Rejected	Rejected
Q9UHV9	Prefoldin subunit 2 [OS=Homo sapiens]	0.936161	0.37	1.46098	3.38696	0.856	3.72778	0.0723391	0.0335238	Rejected	Rejected
P43246-1	DNA mismatch repair protein MSH2 [OS=Homo sapiens]	2.86933	0.989	2.23079	1.94346	0.855	2.46298	0.020896	0.0335538	Enriched	Rejected
Q15042-3	Isoform 2 of Rab3 GTPase-activating protein catalytic subunit [OS=Homo sapiens]	5.66083	0.606	7.06815	1.74459	0.855	2.8081	0.0616657	0.0335839	Rejected	Rejected
Q9BWF3-1	RNA-binding protein 4 [OS=Homo sapiens]	1.08646	0.658	1.31004	2.70662	0.854	3.09781	0.0583885	0.033614	Rejected	Rejected
Q9UGP8	Translocation protein SEC63 homolog [OS=Homo sapiens]	1.08157	0.64	1.41796	1.37518	0.854	1.57073	0.059561	0.033644	Rejected	Rejected
Q7KZN9	Cytochrome c oxidase assembly protein COX15 homolog [OS=Homo sapiens]	0.847825	0.207	1.39328	32.8339	0.854	35.3783	0.0774504	0.0336741	Rejected	Rejected
Q07666	KH domain-containing, RNA-binding, signal transduction-associated protein 1 [OS=Homo sapiens]	12.8409	0.992	9.35825	1.61954	0.853	2.1575	0.0196633	0.0337041	Enriched	Rejected
Q8WVX9	Fatty acyl-CoA reductase 1 [OS=Homo sapiens]	2.96454	0.986	2.04564	21.5513	0.853	24.4568	0.0226398	0.0337342	Enriched	Rejected
Q07866-9	Isoform I of Kinesin light chain 1 [OS=Homo sapiens]	2.00267	0.6	14.8961	2.61613	0.853	7.74026	0.0619363	0.0337643	Rejected	Rejected
Q96HY6-1	DDRGK domain-containing protein 1 [OS=Homo sapiens]	0.879511	0.319	1.50202	1.1848	0.853	1.29892	0.0736921	0.0337943	Rejected	Rejected
Q7KZ85	transcription elongation factor spt6 [OS=Homo sapiens]	8.10037	0.91	10.6203	11.5865	0.852	15.7882	0.0375526	0.0338244	Rejected	Rejected
P02545	Prelamin-A/C [OS=Homo sapiens]	4.04672	0.755	5.25794	2.62854	0.852	3.72139	0.0526458	0.0338545	Rejected	Rejected
Q9H3H3-3	Isoform 3 of UPF0696 protein C11orf68 [OS=Homo sapiens]	0.845769	0.291	1.51976	6.55787	0.852	8.07647	0.074534	0.0338845	Rejected	Rejected
P50570-1	Dynamin-2 [OS=Homo sapiens]	0.81705	0.17	1.3813	2.49304	0.851	6.24185	0.0783824	0.0339146	Rejected	Rejected
Q16576-1	Histone-binding protein RBBP7 [OS=Homo sapiens]	5.759	1	2.64699	2.58358	0.85	3.16538	0.00679495	0.0339447	Enriched	Rejected
P15311	Ezrin [OS=Homo sapiens]	3.95627	0.998	2.80561	2.47414	0.85	7.73349	0.0136801	0.0339747	Enriched	Rejected
P18031	Tyrosine-protein phosphatase non-receptor type 1 [OS=Homo sapiens]	1.91837	0.822	2.5886	2.46825	0.85	3.9341	0.0466927	0.0340048	Rejected	Rejected
Q13630	GDP-L-fucose synthase [OS=Homo sapiens]	1.17633	0.818	1.29158	1.51029	0.85	1.77189	0.0473241	0.0340349	Rejected	Rejected
Q9UEY8-1	Gamma-adducin [OS=Homo sapiens]	2.30193	1	1.74285	1.34837	0.849	1.62592	0.0119062	0.0340649	Enriched	Rejected
Q92520	Protein FAM3C [OS=Homo sapiens]	0.97241	0.463	1.43691	1.2911	0.849	1.52278	0.0694528	0.034095	Rejected	Rejected
Q12931	heat shock protein 75 kDa, mitochondrial [OS=Homo sapiens]	8.05026	0.991	6.46577	2.61777	0.848	3.45248	0.0201744	0.0341251	Enriched	Rejected
P13489	Ribonuclease inhibitor [OS=Homo sapiens]	1.88171	0.898	2.11801	9.66659	0.847	13.4224	0.0392063	0.0341551	Rejected	Rejected
O95352	Ubiquitin-like modifier-activating enzyme ATG7 [OS=Homo sapiens]	1.24371	0.842	1.41526	4.87566	0.847	5.73714	0.0448888	0.0341852	Rejected	Rejected
O15511-2	Isoform 2 of Actin-related protein 2/3 complex subunit 5 [OS=Homo sapiens]	1.0436	0.661	1.18504	8.31921	0.847	9.30265	0.0582682	0.0342153	Rejected	Rejected
Q8TED1	Probable glutathione peroxidase 8 [OS=Homo sapiens]	16.6108	0.821	18.3665	1.67123	0.846	1.84312	0.0468731	0.0342453	Rejected	Rejected
O15027-5	Isoform 5 of Protein transport protein Sec16A [OS=Homo sapiens]	1.08724	0.672	1.28872	1.1675	0.846	1.3186	0.0577871	0.0342754	Rejected	Rejected
Q86TI0	TBC1 domain family member 1 [OS=Homo sapiens]	1.09623	0.546	2.63236	2.50618	0.846	3.23702	0.0651834	0.0343055	Rejected	Rejected
Q6P9B6	TLD domain-containing protein 1 [OS=Homo sapiens]	1.00447	0.503	1.47398	1.28891	0.846	1.50329	0.067709	0.0343355	Rejected	Rejected
P48506	glutamate--cysteine ligase catalytic subunit [OS=Homo sapiens]	0.983638	0.484	1.30841	1.22626	0.846	1.40155	0.0684907	0.0343656	Rejected	Rejected
P82970	High mobility group nucleosome-binding domain-containing protein 5 [OS=Homo sapiens]	3.72934	0.945	3.79714	1.94087	0.845	2.61183	0.0320806	0.0343957	Rejected	Rejected
Q9P035	Very-long-chain (3R)-3-hydroxyacyl-CoA dehydratase 3 [OS=Homo sapiens]	1.91574	0.843	2.3492	1.41362	0.845	1.74594	0.0447986	0.0344257	Rejected	Rejected
O95721	Synaptosomal-associated protein 29 [OS=Homo sapiens]	0.869741	0.255	1.38219	6.28073	0.844	7.73392	0.0757968	0.0344558	Rejected	Rejected
Q01130	serine/arginine-rich splicing factor 2 [OS=Homo sapiens]	0.404445	0.052	2.47486	1.58987	0.844	1.88339	0.0831329	0.0344859	Rejected	Rejected
P55072	Transitional endoplasmic reticulum ATPase [OS=Homo sapiens]	9.1654	1	2.75368	1.5701	0.843	2.12315	0.000631389	0.0345159	Enriched	Rejected
Q15004-1	PCNA-associated factor [OS=Homo sapiens]	2.89565	0.925	3.0302	6.47016	0.843	7.71504	0.0351173	0.034546	Rejected	Rejected
P11908-2	Isoform 2 of Ribose-phosphate pyrophosphokinase 2 [OS=Homo sapiens]	1.1232	0.756	1.28147	1.18639	0.843	1.31477	0.0526158	0.0345761	Rejected	Rejected
P42574	Caspase-3 [OS=Homo sapiens]	0.821173	0.395	1.80318	61.3042	0.843	71.6432	0.0716176	0.0346061	Rejected	Rejected
O95163	Elongator complex protein 1 [OS=Homo sapiens]	0.837699	0.252	1.56021	1.22882	0.843	1.38777	0.0759471	0.0346362	Rejected	Rejected
Q7L523	Ras-related GTP-binding protein A [OS=Homo sapiens]	14.9673	0.898	15.7387	1.30155	0.842	1.57869	0.0393566	0.0346663	Rejected	Rejected
Q9UBX3-2	Isoform 2 of Mitochondrial dicarboxylate carrier [OS=Homo sapiens]	1.87482	0.93	1.97558	7.3111	0.841	17.0298	0.0341551	0.0346963	Rejected	Rejected
Q7Z3K3-1	Pogo transposable element with ZNF domain [OS=Homo sapiens]	1.60266	0.819	2.30571	1.32547	0.841	1.54439	0.0472339	0.0347264	Rejected	Rejected
Q99961	Endophilin-A2 [OS=Homo sapiens]	0.877795	0.288	1.4586	1.66641	0.841	2.4745	0.0745941	0.0347565	Rejected	Rejected
Q9UHY1	Nuclear receptor-binding protein [OS=Homo sapiens]	0.488475	0.005	1.67357	3.59892	0.841	22.6073	0.0855983	0.0347865	Rejected	Rejected
P09543-1	2',3'-cyclic-nucleotide 3'-phosphodiesterase [OS=Homo sapiens]	0.661867	0.355	2.29038	3.83357	0.84	6.49041	0.0726999	0.0348166	Rejected	Rejected
P18887	DNA repair protein XRCC1 [OS=Homo sapiens]	0.670417	0.035	1.44154	1.18121	0.84	1.31266	0.0837643	0.0348467	Rejected	Rejected
P52943-2	Isoform 2 of Cysteine-rich protein 2 [OS=Homo sapiens]	2.0075	0.995	1.61576	1.30166	0.839	1.52968	0.0174985	0.0348767	Enriched	Rejected
Q16795	NADH dehydrogenase [ubiquinone] 1 alpha subcomplex subunit 9, mitochondrial [OS=Homo sapiens]	10.1333	0.993	7.45964	2.71731	0.839	4.586	0.0190619	0.0349068	Enriched	Rejected
P21926	CD9 antigen [OS=Homo sapiens]	6.81201	0.998	3.69927	1.84814	0.838	2.83801	0.0143716	0.0349369	Enriched	Rejected
Q9NZB2-6	Isoform F of Constitutive coactivator of PPAR-gamma-like protein 1 [OS=Homo sapiens]	3.82878	0.843	4.81059	8.22203	0.838	9.91009	0.0446783	0.0349669	Rejected	Rejected
P09417	dihydropteridine reductase [OS=Homo sapiens]	1.01658	0.546	1.27315	1.66505	0.838	2.03702	0.0651533	0.034997	Rejected	Rejected
Q6VN20	Ran-binding protein 10 [OS=Homo sapiens]	0.883301	0.293	1.47834	44.7308	0.838	52.064	0.0743235	0.0350271	Rejected	Rejected
Q9Y448	Small kinetochore-associated protein [OS=Homo sapiens]	2.70317	0.992	2.26235	1.40338	0.837	2.11674	0.0200241	0.0350571	Enriched	Rejected
P54920	alpha-soluble nsf attachment protein [OS=Homo sapiens]	2.77164	0.87	3.29135	1.32896	0.837	1.61883	0.0419423	0.0350872	Rejected	Rejected
P55011	Solute carrier family 12 member 2 [OS=Homo sapiens]	1.86517	0.855	2.35248	1.32902	0.837	1.48663	0.0434756	0.0351173	Rejected	Rejected
P27105	erythrocyte band 7 integral membrane protein [OS=Homo sapiens]	0.818508	0.347	1.90716	5.08486	0.837	6.93827	0.0730006	0.0351473	Rejected	Rejected
Q08209-1	Serine/threonine-protein phosphatase 2B catalytic subunit alpha isoform [OS=Homo sapiens]	3.10295	0.925	3.56153	1.62402	0.836	2.44609	0.0350271	0.0351774	Rejected	Rejected
O95347-1	structural maintenance of chromosomes protein 2 [OS=Homo sapiens]	52.7998	0.924	54.1402	4.34681	0.836	6.85188	0.0352075	0.0352075	Rejected	Rejected
Q8TDN6	Ribosome biogenesis protein BRX1 homolog [OS=Homo sapiens]	1.0502	0.546	1.61737	8.84937	0.836	10.0039	0.0650631	0.0352375	Rejected	Rejected
Q9BRQ6	MICOS complex subunit mic25 [OS=Homo sapiens]	122.434	0.997	5.34612	1.60181	0.834	2.11509	0.0155743	0.0352676	Enriched	Rejected
Q969N2	GPI transamidase component PIG-T [OS=Homo sapiens]	3.85844	0.921	4.09129	1.78826	0.834	2.15273	0.035929	0.0352977	Rejected	Rejected
Q14254	Flotillin-2 [OS=Homo sapiens]	12.322	0.989	4.28579	1.68539	0.833	2.73966	0.0211064	0.0353277	Enriched	Rejected
Q16630-2	Isoform 2 of Cleavage and polyadenylation specificity factor subunit 6 [OS=Homo sapiens]	11.2874	0.975	6.2219	1.67367	0.833	2.77546	0.0256765	0.0353578	Enriched	Rejected
Q15813-2	Isoform 2 of Tubulin-specific chaperone E [OS=Homo sapiens]	0.884143	0.386	2.38341	1.25308	0.833	1.47091	0.071828	0.0353879	Rejected	Rejected
P62495	Eukaryotic peptide chain release factor subunit 1 [OS=Homo sapiens]	2.0176	0.98	1.82096	2.23888	0.831	3.1182	0.0242333	0.0354179	Enriched	Rejected
P40855-1	Peroxisomal biogenesis factor 19 [OS=Homo sapiens]	1.03977	0.598	1.36013	3.76719	0.831	4.53762	0.0621167	0.035448	Rejected	Rejected
P12270	Nucleoprotein TPR [OS=Homo sapiens]	6.68378	1	2.26603	1.55732	0.83	2.5584	0.00207456	0.0354781	Enriched	Rejected
Q15008	26S proteasome non-ATPase regulatory subunit 6 [OS=Homo sapiens]	11.4093	0.998	8.72968	2.08748	0.83	3.72761	0.0138605	0.0355081	Enriched	Rejected
Q13557-11	Isoform Delta 11 of Calcium/calmodulin-dependent protein kinase type II subunit delta [OS=Homo sapiens]	1.75189	0.993	1.46247	1.77263	0.83	2.10049	0.0190319	0.0355382	Enriched	Rejected
Q9Y3A5	Ribosome maturation protein SBDS [OS=Homo sapiens]	3.63924	0.95	3.63987	3.60578	0.83	6.03859	0.0312387	0.0355683	Rejected	Rejected
Q99417	C-Myc-binding protein [OS=Homo sapiens]	0.947025	0.385	1.36356	1.43354	0.83	1.62846	0.0718882	0.0355983	Rejected	Rejected
Q9BZK7	F-box-like/WD repeat-containing protein TBL1XR1 [OS=Homo sapiens]	0.824723	0.128	1.30945	1.73196	0.83	1.93971	0.0800962	0.0356284	Rejected	Rejected
Q02413	Desmoglein-1 [OS=Homo sapiens]	4.8774	1	2.06576	1.27269	0.829	1.58072	0.0039086	0.0356584	Enriched	Rejected
Q15274	nicotinate-nucleotide pyrophosphorylase [carboxylating] [OS=Homo sapiens]	28.8602	0.974	18.1313	4.30657	0.829	4.93079	0.0260373	0.0356885	Rejected	Rejected
Q9NZN4	EH domain-containing protein 2 [OS=Homo sapiens]	1.35859	0.586	2.0415	2.86081	0.829	4.39735	0.062718	0.0357186	Rejected	Rejected
P29401-2	Isoform 2 of Transketolase [OS=Homo sapiens]	3.56812	0.999	2.21584	1.57868	0.828	2.29177	0.0122971	0.0357486	Enriched	Rejected
Q96A49	Synapse-associated protein 1 [OS=Homo sapiens]	4.85397	0.938	5.01988	13.1149	0.828	20.8202	0.0330427	0.0357787	Rejected	Rejected
O43324-1	Eukaryotic translation elongation factor 1 epsilon-1 [OS=Homo sapiens]	2.28673	0.517	3.07839	12.474	0.828	19.7362	0.0668972	0.0358088	Rejected	Rejected
P30519	Heme oxygenase 2 [OS=Homo sapiens]	0.92902	0.397	1.62737	1.55378	0.828	2.67742	0.0715274	0.0358388	Rejected	Rejected
O60716-1	Catenin delta-1 [OS=Homo sapiens]	6.63282	0.984	5.29151	1.95569	0.827	3.00107	0.0229104	0.0358689	Enriched	Rejected
P01042	kininogen-1 [OS=Homo sapiens]	1.86096	0.981	1.71127	2.30194	0.826	3.13162	0.0240529	0.035899	Enriched	Rejected
P06733-1	alpha-enolase [OS=Homo sapiens]	4.42938	1	2.23442	1.57723	0.825	2.13791	0.000751654	0.035929	Enriched	Rejected
Q02241-1	Kinesin-like protein KIF23 [OS=Homo sapiens]	6.66161	0.987	6.16817	2.0847	0.825	3.6843	0.0222189	0.0359591	Enriched	Rejected
Q5JRK9	putative G antigen family E member 3 [OS=Homo sapiens]	1.21949	0.792	1.49738	1.26016	0.825	1.48351	0.049549	0.0359892	Rejected	Rejected
O15042	U2 snRNP-associated SURP motif-containing protein [OS=Homo sapiens]	0.476078	0.082	2.57866	2.30335	0.825	2.64971	0.0820204	0.0360192	Rejected	Rejected
O94842	TOX high mobility group box family member 4 [OS=Homo sapiens]	3.85364	1	1.98141	1.4219	0.824	1.77124	0.0107336	0.0360493	Enriched	Rejected
P21359-1	Neurofibromin [OS=Homo sapiens]	0.744483	0.038	1.34624	19.4523	0.824	21.9711	0.0836741	0.0360794	Rejected	Rejected
Q12765-2	Isoform 2 of Secernin-1 [OS=Homo sapiens]	5.45951	0.94	5.59161	1.23585	0.823	1.44458	0.032742	0.0361094	Rejected	Rejected
Q9UI30	Multifunctional methyltransferase subunit TRM112-like protein [OS=Homo sapiens]	4.13807	0.935	4.90096	1.70428	0.823	3.0413	0.0334937	0.0361395	Rejected	Rejected
O75940	Survival of motor neuron-related-splicing factor 30 [OS=Homo sapiens]	1.69511	0.727	3.93124	2.77544	0.823	3.43371	0.0542995	0.0361696	Rejected	Rejected
Q9BWM7	Sideroflexin-3 [OS=Homo sapiens]	0.652033	0.084	1.70792	2.62594	0.823	2.98905	0.0819002	0.0361996	Rejected	Rejected
P56192	Methionine--tRNA ligase, cytoplasmic [OS=Homo sapiens]	3.81481	0.971	3.47335	5.27458	0.822	7.01514	0.0271497	0.0362297	Rejected	Rejected
P17655-1	Calpain-2 catalytic subunit [OS=Homo sapiens]	2.07344	0.942	2.16967	1.81102	0.822	3.00919	0.0324113	0.0362598	Rejected	Rejected
Q9NYL9	tropomodulin-3 [OS=Homo sapiens]	4.66798	0.854	5.47183	46.6155	0.822	56.9397	0.0435959	0.0362898	Rejected	Rejected
Q9NW82	WD repeat-containing protein 70 [OS=Homo sapiens]	1.24696	0.738	1.71277	1.14514	0.822	1.25997	0.0537583	0.0363199	Rejected	Rejected
P49848-3	Isoform 3 of Transcription initiation factor TFIID subunit 6 [OS=Homo sapiens]	0.936615	0.307	1.22991	1.20895	0.822	1.42471	0.0739627	0.03635	Rejected	Rejected
P30050-1	60S ribosomal protein L12 [OS=Homo sapiens]	3.55318	1	2.04391	1.42484	0.821	1.86659	0.00766687	0.03638	Enriched	Rejected
P56537-1	eukaryotic translation initiation factor 6 [OS=Homo sapiens]	3.35956	0.997	3.07047	4.7038	0.821	6.79172	0.0153337	0.0364101	Enriched	Rejected
Q9Y281-1	Cofilin-2 [OS=Homo sapiens]	4.04176	0.969	3.61717	1.59255	0.821	2.38628	0.0276909	0.0364402	Rejected	Rejected
P14314	Glucosidase 2 subunit beta [OS=Homo sapiens]	5.24947	0.942	5.49215	3.95491	0.821	5.53736	0.0324414	0.0364702	Rejected	Rejected
O00213	Amyloid beta A4 precursor protein-binding family B member 1 [OS=Homo sapiens]	0.742801	0.03	1.32661	1.14312	0.821	1.25293	0.0840649	0.0365003	Rejected	Rejected
P07196	Neurofilament light polypeptide [OS=Homo sapiens]	2.22838	0.858	2.74654	1.19934	0.82	1.35301	0.0431449	0.0365304	Rejected	Rejected
P09012	U1 SMALL NUCLEAR RIBONUCLEOPROTEIN A [OS=Homo sapiens]	1.24434	0.826	1.45967	1.6857	0.819	2.19311	0.0462718	0.0365604	Rejected	Rejected
P82909	28S ribosomal protein S36, mitochondrial [OS=Homo sapiens]	13.3253	1	2.64734	3.68234	0.818	5.46164	0.0120565	0.0365905	Enriched	Rejected
Q9Y3Z3	deoxynucleoside triphosphate triphosphohydrolase SAMHD1 [OS=Homo sapiens]	5.17666	0.988	4.04128	3.3242	0.818	4.16784	0.0217378	0.0366206	Enriched	Rejected
P33993-1	DNA replication licensing factor MCM7 [OS=Homo sapiens]	4.41879	0.955	4.34975	6.5631	0.818	10.7989	0.0301563	0.0366506	Rejected	Rejected
O43617-1	Trafficking protein particle complex subunit 3 [OS=Homo sapiens]	11.6609	0.793	15.0341	3.71648	0.818	5.33735	0.0494287	0.0366807	Rejected	Rejected
Q8WVB6-2	Isoform 2 of Chromosome transmission fidelity protein 18 homolog [OS=Homo sapiens]	1.03034	0.555	1.5218	3.64543	0.818	3.99867	0.0644317	0.0367108	Rejected	Rejected
Q96I25	Splicing factor 45 [OS=Homo sapiens]	1.24308	0.549	2.07866	1.48636	0.818	2.51865	0.0649128	0.0367408	Rejected	Rejected
Q92974	Rho guanine nucleotide exchange factor 2 [OS=Homo sapiens]	0.615199	0.433	1.97002	6.38922	0.818	7.34076	0.0706254	0.0367709	Rejected	Rejected
O00567	Nucleolar protein 56 [OS=Homo sapiens]	0.196725	0.12	7.55178	13.3159	0.818	16.4405	0.0803367	0.036801	Rejected	Rejected
Q13405	39S ribosomal protein L49, mitochondrial [OS=Homo sapiens]	0.735891	0.048	1.36575	1.18582	0.817	1.34011	0.0832832	0.036831	Rejected	Rejected
Q9P0J7	E3 ubiquitin-protein ligase KCMF1 [OS=Homo sapiens]	1.62755	0.808	2.24938	1.2619	0.816	1.48092	0.0482862	0.0368611	Rejected	Rejected
P61224-1	Ras-related protein Rap-1b [OS=Homo sapiens]	3.31259	0.785	3.88121	3.0807	0.816	3.8164	0.0502105	0.0368912	Rejected	Rejected
P52815	39S ribosomal protein L12, mitochondrial [OS=Homo sapiens]	1.1292	0.737	1.35827	37.0612	0.816	43.9681	0.0538184	0.0369212	Rejected	Rejected
P01036	Cystatin-S [OS=Homo sapiens]	1.75032	0.722	2.96111	5.44051	0.816	12.1104	0.0547204	0.0369513	Rejected	Rejected
Q96KP4	cytosolic non-specific dipeptidase [OS=Homo sapiens]	1.42214	0.653	3.82508	2.61934	0.816	3.64035	0.0587192	0.0369814	Rejected	Rejected
P02675	Fibrinogen beta chain [OS=Homo sapiens]	7.66991	0.944	7.75795	3.31283	0.815	13.441	0.032291	0.0370114	Rejected	Rejected
Q14202	Zinc finger MYM-type protein 3 [OS=Homo sapiens]	1.28747	0.843	1.52929	5.21195	0.815	6.39337	0.0448286	0.0370415	Rejected	Rejected
O94826	Mitochondrial import receptor subunit TOM70 [OS=Homo sapiens]	3.51521	0.821	5.29493	1.4709	0.815	2.08767	0.046813	0.0370716	Rejected	Rejected
O43172-1	U4/U6 small nuclear ribonucleoprotein Prp4 [OS=Homo sapiens]	0.858374	0.053	1.16525	1.21872	0.815	1.42472	0.0831028	0.0371016	Rejected	Rejected
Q96LD4	Tripartite motif-containing protein 47 [OS=Homo sapiens]	4.32455	0.826	5.27025	7.68534	0.814	12.9209	0.046362	0.0371317	Rejected	Rejected
Q6PJG6-1	BRCA1-associated ATM activator 1 [OS=Homo sapiens]	1.89413	0.726	7.83539	5.73311	0.814	9.24512	0.0543596	0.0371618	Rejected	Rejected
O15294	UDP-N-acetylglucosamine--peptide N-acetylglucosaminyltransferase 110 kDa subunit [OS=Homo sapiens]	0.700182	0.234	2.54901	2.54466	0.814	3.17663	0.0764883	0.0371918	Rejected	Rejected
Q13162	Peroxiredoxin-4 [OS=Homo sapiens]	1.63881	0.938	1.66594	1.32165	0.813	1.60596	0.0329525	0.0372219	Rejected	Rejected
Q6Y1H2	Very-long-chain (3R)-3-hydroxyacyl-CoA dehydratase 2 [OS=Homo sapiens]	2.35631	0.915	2.43988	9.08605	0.813	10.7412	0.036831	0.037252	Rejected	Rejected
O00541-1	Pescadillo homolog [OS=Homo sapiens]	1.45801	0.861	1.70831	1.73073	0.813	2.63513	0.0428443	0.037282	Rejected	Rejected
Q92544	Transmembrane 9 superfamily member 4 [OS=Homo sapiens]	25.4764	0.981	6.86618	2.29756	0.812	3.23924	0.0239928	0.0373121	Enriched	Rejected
Q9BRJ6	Uncharacterized protein C7orf50 [OS=Homo sapiens]	1.46927	0.751	2.46986	6.10213	0.812	16.1118	0.0529465	0.0373422	Rejected	Rejected
Q9Y376	Calcium-binding protein 39 [OS=Homo sapiens]	0.965916	0.434	1.43519	1.24473	0.812	1.48412	0.0705352	0.0373722	Rejected	Rejected
Q14677-3	Isoform 3 of Clathrin interactor 1 [OS=Homo sapiens]	4.16419	0.988	2.50573	1.65174	0.811	2.43287	0.0216176	0.0374023	Enriched	Rejected
P26599-3	Isoform 3 of Polypyrimidine tract-binding protein 1 [OS=Homo sapiens]	7.46419	1	2.95728	1.28805	0.81	1.55001	0.0037282	0.0374324	Enriched	Rejected
O75844	caax prenyl protease 1 homolog [OS=Homo sapiens]	5.51979	1	2.68128	1.2241	0.81	1.44299	0.00920024	0.0374624	Enriched	Rejected
P61457	Pterin-4-alpha-carbinolamine dehydratase [OS=Homo sapiens]	1.00715	0.524	1.48027	1.3127	0.81	1.66495	0.0664462	0.0374925	Rejected	Rejected
O75781	Paralemmin-1 [OS=Homo sapiens]	0.894621	0.132	1.1627	1.5112	0.81	2.07883	0.0799759	0.0375225	Rejected	Rejected
P36873-2	Isoform Gamma-2 of Serine/threonine-protein phosphatase PP1-gamma catalytic subunit [OS=Homo sapiens]	0.610947	0.085	1.7154	1.87589	0.81	3.09853	0.08181	0.0375526	Rejected	Rejected
Q96EK6	glucosamine 6-phosphate N-acetyltransferase [OS=Homo sapiens]	10.4207	0.961	10.034	2.46918	0.809	5.32395	0.0292844	0.0375827	Rejected	Rejected
Q99805	Transmembrane 9 superfamily member 2 [OS=Homo sapiens]	1.02913	0.607	1.21289	2.99298	0.809	4.20388	0.0615755	0.0376127	Rejected	Rejected
Q14894	Ketimine reductase mu-crystallin [OS=Homo sapiens]	0.871349	0.292	1.50795	4.01677	0.809	9.1027	0.0744738	0.0376428	Rejected	Rejected
P20700	Lamin-B1 [OS=Homo sapiens]	14.9522	1	3.46626	2.43953	0.807	3.09417	0.00120265	0.0376729	Enriched	Rejected
P62136-1	serine/threonine-protein phosphatase PP1-alpha catalytic subunit [OS=Homo sapiens]	4.11242	0.975	3.72069	6.37642	0.807	7.08942	0.0256464	0.0377029	Enriched	Rejected
Q9NYL2-2	Isoform 2 of Mitogen-activated protein kinase kinase kinase 20 [OS=Homo sapiens]	0.942062	0.375	1.39394	1.12686	0.807	1.23572	0.0720986	0.037733	Rejected	Rejected
Q9BUR5-1	MICOS complex subunit MIC26 [OS=Homo sapiens]	0.783849	0.068	1.30855	2.30449	0.807	7.75936	0.0825316	0.0377631	Rejected	Rejected
P31946	14-3-3 protein beta/alpha [OS=Homo sapiens]	67.8227	1	20.7054	1.66538	0.806	2.38373	0.00276609	0.0377931	Enriched	Rejected
Q99627-1	COP9 signalosome complex subunit 8 [OS=Homo sapiens]	0.963744	0.442	1.54759	4.4045	0.806	5.24677	0.0702646	0.0378232	Rejected	Rejected
Q9BUP3-3	Isoform 3 of Oxidoreductase HTATIP2 [OS=Homo sapiens]	1.14734	0.753	1.24326	1.22366	0.804	1.43241	0.0528563	0.0378533	Rejected	Rejected
P20340-1	Ras-related protein Rab-6A [OS=Homo sapiens]	1.05338	0.68	1.26057	9.75642	0.804	13.1774	0.0574263	0.0378833	Rejected	Rejected
P20810-6	Isoform 6 of Calpastatin [OS=Homo sapiens]	0.601279	0.116	1.8526	1.8651	0.804	2.4747	0.0805171	0.0379134	Rejected	Rejected
Q6UXN9	WD repeat-containing protein 82 [OS=Homo sapiens]	0.364312	0.094	22.6364	1.22552	0.803	1.38962	0.0814191	0.0379435	Rejected	Rejected
Q96RE7	Nucleus accumbens-associated protein 1 [OS=Homo sapiens]	0.588441	0.051	1.65657	3.17957	0.803	4.01396	0.083163	0.0379735	Rejected	Rejected
Q8NBJ5	Procollagen galactosyltransferase 1 [OS=Homo sapiens]	0.194474	0	2.24371	70.4801	0.803	103.006	0.0865304	0.0380036	Rejected	Rejected
Q12996-1	Cleavage stimulation factor subunit 3 [OS=Homo sapiens]	1.25537	0.82	1.45496	6.30686	0.801	11.3269	0.0470535	0.0380337	Rejected	Rejected
Q9Y5P6-2	Isoform 2 of Mannose-1-phosphate guanyltransferase beta [OS=Homo sapiens]	0.867543	0.37	1.97787	1.52705	0.801	1.76847	0.072279	0.0380637	Rejected	Rejected
Q13601	KRR1 small subunit processome component homolog [OS=Homo sapiens]	0.881293	0.147	1.19713	1.26994	0.801	1.55521	0.0794949	0.0380938	Rejected	Rejected
Q8NI36	WD repeat-containing protein 36 [OS=Homo sapiens]	0.730923	0.106	1.49925	3.17474	0.801	4.2423	0.0808479	0.0381239	Rejected	Rejected
Q9H3S7	Tyrosine-protein phosphatase non-receptor type 23 [OS=Homo sapiens]	5.41004	0.996	4.0065	1.53142	0.8	2.0712	0.0162357	0.0381539	Enriched	Rejected
Q08257	Quinone oxidoreductase [OS=Homo sapiens]	3.01363	0.771	4.89675	17.9569	0.8	23.2725	0.0515033	0.038184	Rejected	Rejected
Q9P291	Armadillo repeat-containing X-linked protein 1 [OS=Homo sapiens]	1.14601	0.717	1.55545	2.40249	0.8	2.6385	0.0553518	0.0382141	Rejected	Rejected
P78371-1	T-complex protein 1 subunit beta [OS=Homo sapiens]	1.26543	0.657	2.03763	1.54427	0.8	2.34689	0.0584486	0.0382441	Rejected	Rejected
Q96BN8	Ubiquitin thioesterase otulin [OS=Homo sapiens]	3.03731	0.975	2.91846	1.3242	0.799	1.77196	0.0258569	0.0382742	Enriched	Rejected
Q96I24-1	Far upstream element-binding protein 3 [OS=Homo sapiens]	1.58144	0.781	2.70389	2.56389	0.799	8.03523	0.0506314	0.0383043	Rejected	Rejected
Q9UG63-2	Isoform 2 of ATP-binding cassette sub-family F member 2 [OS=Homo sapiens]	0.334361	0.041	2.88238	8.01577	0.799	12.7618	0.0835538	0.0383343	Rejected	Rejected
Q5H9R7-5	Isoform 5 of Serine/threonine-protein phosphatase 6 regulatory subunit 3 [OS=Homo sapiens]	1.76289	0.779	2.17475	12.146	0.798	24.4152	0.0508419	0.0383644	Rejected	Rejected
P24666-1	Low molecular weight phosphotyrosine protein phosphatase [OS=Homo sapiens]	0.833295	0.483	1.80907	3.84238	0.798	5.43834	0.0685508	0.0383945	Rejected	Rejected
Q96JM3	Chromosome alignment-maintaining phosphoprotein 1 [OS=Homo sapiens]	0.862118	0.383	1.9396	1.61586	0.798	2.20799	0.0719182	0.0384245	Rejected	Rejected
O00505	Importin subunit alpha-4 [OS=Homo sapiens]	2.15328	0.633	10.6264	2.83907	0.797	6.15452	0.0600722	0.0384546	Rejected	Rejected
Q01085-2	Isoform 2 of Nucleolysin TIAR [OS=Homo sapiens]	1.02844	0.552	1.44152	5.56828	0.797	7.52018	0.0645821	0.0384847	Rejected	Rejected
P19784	casein kinase II subunit alpha' [OS=Homo sapiens]	0.622591	0.247	3.17693	1.49219	0.797	2.37715	0.0760673	0.0385147	Rejected	Rejected
P21964-1	Catechol O-methyltransferase [OS=Homo sapiens]	0.864158	0.166	1.23745	1.22131	0.797	1.49555	0.078623	0.0385448	Rejected	Rejected
Q3SXM5	Inactive hydroxysteroid dehydrogenase-like protein 1 [OS=Homo sapiens]	0.514905	0.003	1.47982	2.52331	0.797	3.04647	0.0859591	0.0385749	Rejected	Rejected
O14737-2	Isoform 2 of Programmed cell death protein 5 [OS=Homo sapiens]	1.5132	0.919	1.59076	1.17017	0.796	1.35814	0.0362898	0.0386049	Rejected	Rejected
Q9UHI6	Probable ATP-dependent RNA helicase DDX20 [OS=Homo sapiens]	1.22237	0.844	1.38826	1.18348	0.796	1.39401	0.0445881	0.038635	Rejected	Rejected
O95684	FGFR1 oncogene partner [OS=Homo sapiens]	2.13177	0.686	2.94841	2.3165	0.796	3.93177	0.0570054	0.0386651	Rejected	Rejected
Q96IJ6-2	Isoform 2 of Mannose-1-phosphate guanyltransferase alpha [OS=Homo sapiens]	0.932733	0.396	1.37339	1.20799	0.796	1.41637	0.0715875	0.0386951	Rejected	Rejected
Q9H0W8	protein SMG9 [OS=Homo sapiens]	0.961591	0.427	1.32005	1.30789	0.795	1.73871	0.0708058	0.0387252	Rejected	Rejected
Q9Y2X7-3	Isoform 3 of ARF GTPase-activating protein GIT1 [OS=Homo sapiens]	2.18619	0.991	1.76682	20.4622	0.794	27.3178	0.0203848	0.0387553	Enriched	Rejected
Q13347	Eukaryotic translation initiation factor 3 subunit I [OS=Homo sapiens]	2.95626	0.926	3.40093	1.64409	0.793	3.32445	0.0348467	0.0387853	Rejected	Rejected
Q9Y5B0	RNA polymerase II subunit A C-terminal domain phosphatase [OS=Homo sapiens]	1.10555	0.644	1.65062	1.42418	0.793	1.72456	0.0592904	0.0388154	Rejected	Rejected
P08648	Integrin alpha-5 [OS=Homo sapiens]	0.967701	0.443	1.4625	1.2143	0.793	1.46275	0.0702044	0.0388455	Rejected	Rejected
Q9BUT1-1	3-hydroxybutyrate dehydrogenase type 2 [OS=Homo sapiens]	1.68918	0.989	1.50102	1.2718	0.791	1.52516	0.0214372	0.0388755	Enriched	Rejected
O96005-1	Cleft lip and palate transmembrane protein 1 [OS=Homo sapiens]	1.26883	0.913	1.32845	1.16004	0.791	1.32935	0.0371317	0.0389056	Rejected	Rejected
Q13185	chromobox protein homolog 3 [OS=Homo sapiens]	1.40754	0.847	1.67991	3.16006	0.791	6.90029	0.0443175	0.0389357	Rejected	Rejected
Q6YN16	Hydroxysteroid dehydrogenase-like protein 2 [OS=Homo sapiens]	1.09517	0.692	1.29597	1.87937	0.79	2.47813	0.0566146	0.0389657	Rejected	Rejected
Q9ULC4-3	Isoform 3 of Malignant T-cell-amplified sequence 1 [OS=Homo sapiens]	1.00923	0.521	2.50818	1.61523	0.79	2.97032	0.0665965	0.0389958	Rejected	Rejected
Q9UHR4	Brain-specific angiogenesis inhibitor 1-associated protein 2-like protein 1 [OS=Homo sapiens]	1.30274	0.906	1.37406	1.10448	0.789	1.21943	0.0382742	0.0390259	Rejected	Rejected
P62888	60S ribosomal protein L30 [OS=Homo sapiens]	3.23902	0.801	4.79161	8.57679	0.789	15.4679	0.0487673	0.0390559	Rejected	Rejected
Q9UHL4	Dipeptidyl peptidase 2 [OS=Homo sapiens]	0.913895	0.346	1.35677	12.1486	0.789	13.8888	0.0730908	0.039086	Rejected	Rejected
Q9UQ35	serine/arginine repetitive matrix protein 2 [OS=Homo sapiens]	5.92541	0.924	9.62964	1.65123	0.788	3.51339	0.0352375	0.0391161	Rejected	Rejected
P20020	Plasma membrane calcium-transporting ATPase 1 [OS=Homo sapiens]	0.91944	0.331	1.4138	1.12214	0.788	1.27162	0.0733013	0.0391461	Rejected	Rejected
P0DOX5	immunoglobulin gamma-1 heavy chain [OS=Homo sapiens]	3.71852	0.989	2.50795	4.73867	0.787	7.21176	0.0211666	0.0391762	Enriched	Rejected
P30154-2	Isoform 2 of Serine/threonine-protein phosphatase 2A 65 kDa regulatory subunit A beta isoform [OS=Homo sapiens]	1.86625	0.957	1.82725	1.22989	0.787	1.51574	0.0297956	0.0392063	Rejected	Rejected
Q9UHD1	cysteine and histidine-rich domain-containing protein 1 [OS=Homo sapiens]	1.49573	0.946	1.50029	4.43765	0.787	9.30285	0.0319002	0.0392363	Rejected	Rejected
Q15904	V-type proton ATPase subunit S1 [OS=Homo sapiens]	1.94483	0.797	2.7329	2.81069	0.787	3.28848	0.0491281	0.0392664	Rejected	Rejected
P62195-1	26S proteasome regulatory subunit 8 [OS=Homo sapiens]	7.34443	1	2.48624	1.56778	0.786	2.57115	0.00441972	0.0392965	Enriched	Rejected
O76024	Wolframin [OS=Homo sapiens]	6.37398	0.909	6.86645	2.65567	0.786	3.84553	0.0376729	0.0393265	Rejected	Rejected
Q14157-5	Isoform 5 of Ubiquitin-associated protein 2-like [OS=Homo sapiens]	1.88505	0.781	2.82206	1.76341	0.786	2.73696	0.0506013	0.0393566	Rejected	Rejected
Q96G03	Phosphoglucomutase-2 [OS=Homo sapiens]	1.25069	0.62	1.96318	6.07051	0.786	12.3819	0.0608238	0.0393867	Rejected	Rejected
P05114	Non-histone chromosomal protein HMG-14 [OS=Homo sapiens]	0.866466	0.254	1.45783	3.20522	0.786	4.43633	0.0758569	0.0394167	Rejected	Rejected
Q9ULV4-3	Isoform 3 of Coronin-1C [OS=Homo sapiens]	4.89407	0.997	2.56089	2.1164	0.785	4.01532	0.0151834	0.0394468	Enriched	Rejected
P34897-1	Serine hydroxymethyltransferase, mitochondrial [OS=Homo sapiens]	2.55933	0.968	2.35818	2.55978	0.785	5.68958	0.0279314	0.0394768	Rejected	Rejected
P62899-2	Isoform 2 of 60S ribosomal protein L31 [OS=Homo sapiens]	1.82287	0.968	1.69409	1.55878	0.785	2.86207	0.0280216	0.0395069	Rejected	Rejected
P22676	Calretinin [OS=Homo sapiens]	32.5601	0.999	20.3024	2.73179	0.784	7.28378	0.0127781	0.039537	Enriched	Rejected
Q7Z406-2	Isoform 2 of Myosin-14 [OS=Homo sapiens]	2.37206	0.815	3.00581	1.63554	0.784	3.06752	0.0476548	0.039567	Rejected	Rejected
Q9UK41-1	vacuolar protein sorting-associated protein 28 homolog [OS=Homo sapiens]	1.7069	0.692	2.18806	1.16687	0.784	1.39586	0.0566446	0.0395971	Rejected	Rejected
P23229-1	integrin alpha-6 [OS=Homo sapiens]	1.07977	0.677	1.2789	1.44127	0.784	2.08174	0.0575466	0.0396272	Rejected	Rejected
P05164-3	Isoform H7 of Myeloperoxidase [OS=Homo sapiens]	0.722904	0.135	1.73376	6.13264	0.784	51.8483	0.0798557	0.0396572	Rejected	Rejected
P33240	cleavage stimulation factor subunit 2 [OS=Homo sapiens]	0.644465	0.097	1.83273	7.50273	0.784	10.0505	0.0812087	0.0396873	Rejected	Rejected
Q9BQ52-1	Zinc phosphodiesterase ELAC protein 2 [OS=Homo sapiens]	6.69279	0.95	6.67915	3.181	0.783	4.38747	0.0314492	0.0397174	Rejected	Rejected
O75251	NADH dehydrogenase [ubiquinone] iron-sulfur protein 7, mitochondrial [OS=Homo sapiens]	1.23826	0.863	1.34184	1.22081	0.783	1.40756	0.0426639	0.0397474	Rejected	Rejected
Q9UBF2	Coatomer subunit gamma-2 [OS=Homo sapiens]	0.67096	0.05	1.42541	9.36842	0.783	11.3149	0.0832231	0.0397775	Rejected	Rejected
Q9Y383	Putative RNA-binding protein Luc7-like 2 [OS=Homo sapiens]	3.0446	0.983	2.74749	2.4882	0.782	3.7789	0.0232411	0.0398076	Enriched	Rejected
Q9UI26-2	Isoform 2 of Importin-11 [OS=Homo sapiens]	1.72237	0.843	2.19599	11.9665	0.782	14.3094	0.0447685	0.0398376	Rejected	Rejected
P11021	78 kDa glucose-regulated protein [OS=Homo sapiens]	2.71713	1	1.7983	1.55275	0.781	2.33077	0.00111245	0.0398677	Enriched	Rejected
Q9UKK9	ADP-sugar pyrophosphatase [OS=Homo sapiens]	3.811	1	2.24867	1.90623	0.781	2.68205	0.00835839	0.0398978	Enriched	Rejected
O75342	Arachidonate 12-lipoxygenase, 12R-type [OS=Homo sapiens]	4.37061	1	2.2553	2.9102	0.781	6.43596	0.0119663	0.0399278	Enriched	Rejected
Q5T1M5	FK506-binding protein 15 [OS=Homo sapiens]	1.16619	0.902	1.20696	1.10193	0.781	1.20541	0.0388154	0.0399579	Rejected	Rejected
P45973	chromobox protein homolog 5 [OS=Homo sapiens]	8.89418	0.981	4.8715	26.538	0.78	45.4847	0.0238725	0.039988	Enriched	Rejected
P82933	28S ribosomal protein S9, mitochondrial [OS=Homo sapiens]	0.718465	0.299	1.89457	1.78679	0.78	3.59363	0.0742032	0.040018	Rejected	Rejected
O00193	Small acidic protein [OS=Homo sapiens]	0.296338	0.003	2.42468	1.32669	0.78	1.84615	0.085929	0.0400481	Rejected	Rejected
P16435	NADPH--cytochrome P450 reductase [OS=Homo sapiens]	4.61669	0.962	4.54058	1.38783	0.779	1.74155	0.0292243	0.0400782	Rejected	Rejected
P17706-1	Tyrosine-protein phosphatase non-receptor type 2 [OS=Homo sapiens]	1.03437	0.567	1.33595	1.21673	0.779	1.46812	0.0638004	0.0401082	Rejected	Rejected
P05161	Ubiquitin-like protein ISG15 [OS=Homo sapiens]	1.04287	0.552	1.4581	1.08009	0.779	1.18347	0.0646422	0.0401383	Rejected	Rejected
Q8WX93-1	palladin [OS=Homo sapiens]	3.52909	0.955	3.497	1.32355	0.777	1.87669	0.0301864	0.0401684	Rejected	Rejected
Q99959	Plakophilin-2 [OS=Homo sapiens]	2.05632	0.838	2.22889	1.63417	0.777	2.06356	0.0450992	0.0401984	Rejected	Rejected
Q12792-2	Twinfilin-1 [OS=Homo sapiens]	11.4259	0.605	15.1574	3.554	0.777	6.28359	0.0617258	0.0402285	Rejected	Rejected
P31944	Caspase-14 [OS=Homo sapiens]	3.92671	1	1.95959	1.41547	0.776	2.22664	0.0055021	0.0402586	Enriched	Rejected
O95466-2	Isoform 2 of Formin-like protein 1 [OS=Homo sapiens]	0.992513	0.469	1.33133	1.1797	0.776	1.42351	0.0691822	0.0402886	Rejected	Rejected
Q8WU90	Zinc finger CCCH domain-containing protein 15 [OS=Homo sapiens]	0.858741	0.285	1.44667	1.21812	0.776	1.44005	0.0747144	0.0403187	Rejected	Rejected
Q9BWD1	Acetyl-CoA acetyltransferase, cytosolic [OS=Homo sapiens]	4.65864	0.976	3.73776	9.4623	0.775	14.5151	0.0255262	0.0403488	Enriched	Rejected
P01876	immunoglobulin heavy constant alpha 1 [OS=Homo sapiens]	2.21967	0.904	2.70174	1.19034	0.775	19.8416	0.0385147	0.0403788	Rejected	Rejected
P18858	DNA ligase 1 [OS=Homo sapiens]	4.76934	0.816	6.06715	5.08645	0.774	8.96408	0.0475646	0.0404089	Rejected	Rejected
P28838	cytosol aminopeptidase [OS=Homo sapiens]	23.1857	0.995	19.6528	1.53797	0.773	2.09152	0.0168671	0.040439	Enriched	Rejected
Q8N7C3	Probable E3 ubiquitin-protein ligase TRIML2 [OS=Homo sapiens]	0.895595	0.268	1.36323	1.1613	0.773	1.39237	0.0752556	0.040469	Rejected	Rejected
Q9BXR0	Queuine tRNA-ribosyltransferase catalytic subunit 1 [OS=Homo sapiens]	0.77797	0.032	1.27006	1.71237	0.773	2.04041	0.0839146	0.0404991	Rejected	Rejected
P12273	Prolactin-inducible protein [OS=Homo sapiens]	1.5159	0.79	2.45214	1.53478	0.772	15.4107	0.0497294	0.0405292	Rejected	Rejected
Q15750-1	TGF-beta-activated kinase 1 and MAP3K7-binding protein 1 [OS=Homo sapiens]	0.89555	0.284	1.28811	1.12041	0.772	1.2844	0.0747745	0.0405592	Rejected	Rejected
Q92896-2	Isoform 2 of Golgi apparatus protein 1 [OS=Homo sapiens]	2.63666	0.976	2.12547	4.67722	0.771	7.6574	0.025436	0.0405893	Enriched	Rejected
P03973	Antileukoproteinase [OS=Homo sapiens]	1.89372	0.81	2.50268	4.18913	0.771	15.1412	0.0481359	0.0406194	Rejected	Rejected
O75312	Zinc finger protein ZPR1 [OS=Homo sapiens]	2.67888	0.782	3.71286	4.19025	0.771	5.32428	0.0505412	0.0406494	Rejected	Rejected
Q12874	splicing factor 3a subunit 3 [OS=Homo sapiens]	2.08949	0.678	2.57305	1.28973	0.771	1.70755	0.0574564	0.0406795	Rejected	Rejected
Q15070-1	Mitochondrial inner membrane protein OXA1L [OS=Homo sapiens]	0.888198	0.241	1.30053	3.8536	0.771	5.49948	0.076368	0.0407096	Rejected	Rejected
P51114-1	Fragile X mental retardation syndrome-related protein 1 [OS=Homo sapiens]	12.492	1	3.64407	4.18456	0.77	7.32572	0.00751654	0.0407396	Enriched	Rejected
Q8NBJ7-1	Sulfatase-modifying factor 2 [OS=Homo sapiens]	1.19816	0.736	1.52939	1.1356	0.77	1.32107	0.0538785	0.0407697	Rejected	Rejected
P32856	Syntaxin-2 [OS=Homo sapiens]	1.0058	0.515	1.51028	1.17154	0.77	1.34225	0.0670174	0.0407998	Rejected	Rejected
Q9NP81-1	Serine--tRNA ligase, mitochondrial [OS=Homo sapiens]	0.830125	0.201	1.46563	1.21866	0.77	1.52227	0.0776609	0.0408298	Rejected	Rejected
Q14108-1	Lysosome membrane protein 2 [OS=Homo sapiens]	1.53215	0.996	1.36689	1.81125	0.768	2.7782	0.016356	0.0408599	Enriched	Rejected
Q8TF68-1	Zinc finger protein 384 [OS=Homo sapiens]	4.6155	0.691	7.34058	4.05465	0.768	6.4749	0.0567048	0.04089	Rejected	Rejected
P61077-3	Isoform 3 of Ubiquitin-conjugating enzyme E2 D3 [OS=Homo sapiens]	18.219	0.992	10.5716	3.92187	0.767	4.53142	0.0199639	0.04092	Enriched	Rejected
Q9UMY4-1	Sorting nexin-12 [OS=Homo sapiens]	1.65667	1	1.42987	5.32687	0.766	8.58296	0.00989176	0.0409501	Enriched	Rejected
P01861	Immunoglobulin heavy constant gamma 4 [OS=Homo sapiens]	4.3482	0.985	3.19741	3.19038	0.766	7.74047	0.0227901	0.0409802	Enriched	Rejected
Q99567	Nuclear pore complex protein Nup88 [OS=Homo sapiens]	0.991285	0.475	1.40047	1.53335	0.766	2.55029	0.0689116	0.0410102	Rejected	Rejected
Q9Y224	UPF0568 protein C14orf166 [OS=Homo sapiens]	0.827361	0.46	2.51448	4.9925	0.766	9.17302	0.069543	0.0410403	Rejected	Rejected
Q8NFW8	N-acylneuraminate cytidylyltransferase [OS=Homo sapiens]	1.13665	0.749	1.32105	1.09785	0.765	1.25866	0.0530367	0.0410704	Rejected	Rejected
P47756-2	Isoform 2 of F-actin-capping protein subunit beta [OS=Homo sapiens]	24.7275	1	2.80144	1.48378	0.764	2.78287	0.00553217	0.0411004	Enriched	Rejected
Q15293	Reticulocalbin-1 [OS=Homo sapiens]	1.83518	0.782	2.37655	30.8187	0.764	48.5496	0.0504811	0.0411305	Rejected	Rejected
P46109	Crk-like protein [OS=Homo sapiens]	1.11622	0.747	1.35513	1.44207	0.764	1.81495	0.053187	0.0411606	Rejected	Rejected
Q9BW60	Elongation of very long chain fatty acids protein 1 [OS=Homo sapiens]	1.04728	0.667	1.16161	1.27566	0.764	1.74623	0.0579675	0.0411906	Rejected	Rejected
P23497	Nuclear autoantigen Sp-100 [OS=Homo sapiens]	1.0146	0.53	1.34259	1.23948	0.764	1.59897	0.0659351	0.0412207	Rejected	Rejected
Q14997	Proteasome activator complex subunit 4 [OS=Homo sapiens]	1.43502	0.514	2.25494	1.16086	0.764	1.40941	0.0670475	0.0412508	Rejected	Rejected
O14949	Cytochrome b-c1 complex subunit 8 [OS=Homo sapiens]	0.911189	0.398	1.60142	1.5665	0.764	2.18275	0.0714973	0.0412808	Rejected	Rejected
Q92643	GPI-anchor transamidase [OS=Homo sapiens]	0.850515	0.216	1.33738	14.2138	0.764	16.6159	0.0771497	0.0413109	Rejected	Rejected
P04899-4	Isoform sGi2 of Guanine nucleotide-binding protein G(i) subunit alpha-2 [OS=Homo sapiens]	4.63589	1	2.39696	1.46305	0.763	2.96675	0.00526158	0.041341	Enriched	Rejected
Q8WWY3	U4/U6 small nuclear ribonucleoprotein Prp31 [OS=Homo sapiens]	1.74533	0.864	2.48965	1.28724	0.763	1.64793	0.0424835	0.041371	Rejected	Rejected
P54687	Branched-chain-amino-acid aminotransferase, cytosolic [OS=Homo sapiens]	4.94174	0.72	5.94853	4.45337	0.763	5.8726	0.0549308	0.0414011	Rejected	Rejected
O95373	Importin-7 [OS=Homo sapiens]	5.61906	1	3.25684	3.39434	0.762	3.90926	0.00249549	0.0414311	Enriched	Rejected
Q96CT7	Coiled-coil domain-containing protein 124 [OS=Homo sapiens]	3.40863	0.945	3.53238	1.20946	0.762	1.54915	0.0321708	0.0414612	Rejected	Rejected
Q9H9B4	Sideroflexin-1 [OS=Homo sapiens]	1.24994	0.602	3.56138	1.27736	0.762	1.98188	0.0618761	0.0414913	Rejected	Rejected
Q9Y5Q9	General transcription factor 3C polypeptide 3 [OS=Homo sapiens]	0.877857	0.223	1.29333	1.12123	0.762	1.23933	0.0768791	0.0415213	Rejected	Rejected
Q15041	ADP-ribosylation factor-like protein 6-interacting protein 1 [OS=Homo sapiens]	0.707723	0.09	1.49389	6.29449	0.762	7.21092	0.0815995	0.0415514	Rejected	Rejected
Q9HC35	Echinoderm microtubule-associated protein-like 4 [OS=Homo sapiens]	0.456435	0.046	2.26993	1.6681	0.762	3.15645	0.0834035	0.0415815	Rejected	Rejected
P68371	Tubulin beta-4B chain [OS=Homo sapiens]	8.02354	0.997	3.22309	1.52997	0.761	2.1594	0.0147023	0.0416115	Enriched	Rejected
Q14258	E3 ubiquitin/ISG15 ligase TRIM25 [OS=Homo sapiens]	0.664763	0.261	3.54233	1.66569	0.761	3.08531	0.0754059	0.0416416	Rejected	Rejected
Q9NR12-1	PDZ and LIM domain protein 7 [OS=Homo sapiens]	5.991	0.988	3.23593	1.64544	0.76	3.23555	0.0217078	0.0416717	Enriched	Rejected
O43583	density-regulated protein [OS=Homo sapiens]	1.10428	0.746	1.34166	1.33463	0.759	2.01231	0.0532772	0.0417017	Rejected	Rejected
Q96EY7-1	pentatricopeptide repeat domain-containing protein 3, mitochondrial [OS=Homo sapiens]	0.882989	0.206	1.29663	3.49663	0.759	4.00562	0.0774805	0.0417318	Rejected	Rejected
P62805	histone H4 [OS=Homo sapiens]	2.50134	1	1.61123	1.12013	0.758	5.33397	0.00366807	0.0417619	Enriched	Rejected
P29144	Tripeptidyl-peptidase 2 [OS=Homo sapiens]	11.4093	1	4.47521	1.40331	0.758	2.37921	0.0106434	0.0417919	Enriched	Rejected
Q9BPX3	Condensin complex subunit 3 [OS=Homo sapiens]	9.76042	0.996	4.49828	3.97184	0.758	9.27533	0.0159351	0.041822	Enriched	Rejected
P10768	S-formylglutathione hydrolase [OS=Homo sapiens]	1.72833	0.985	1.51284	2.37088	0.758	10.7414	0.0227601	0.0418521	Enriched	Rejected
P07737	profilin-1 [OS=Homo sapiens]	6.52351	1	2.44507	1.52542	0.757	8.07045	0.00508118	0.0418821	Enriched	Rejected
P28072	Proteasome subunit beta type-6 [OS=Homo sapiens]	7.7874	1	2.66102	1.43334	0.757	2.31288	0.0111846	0.0419122	Enriched	Rejected
P23284	peptidyl-prolyl cis-trans isomerase B [OS=Homo sapiens]	4.25754	0.972	3.23943	3.39424	0.757	11.4253	0.0266987	0.0419423	Rejected	Rejected
Q93034	Cullin-5 [OS=Homo sapiens]	1.26633	0.913	1.3237	1.19132	0.757	1.52557	0.0371618	0.0419723	Rejected	Rejected
O15347	High mobility group protein B3 [OS=Homo sapiens]	0.780636	0.507	5.69327	9.92178	0.757	17.1145	0.0675286	0.0420024	Rejected	Rejected
P46821	microtubule-associated protein 1B [OS=Homo sapiens]	31.6874	1	19.7342	1.29269	0.756	1.80238	0.00475045	0.0420325	Enriched	Rejected
P13646	Keratin, type I cytoskeletal 13 [OS=Homo sapiens]	6.02016	0.992	4.66565	1.51726	0.756	4.21253	0.0194227	0.0420625	Enriched	Rejected
P62906	60S ribosomal protein L10A [OS=Homo sapiens]	3.37559	0.991	2.30577	1.73314	0.756	2.57303	0.0201443	0.0420926	Enriched	Rejected
Q9H9A5-6	Isoform 6 of CCR4-NOT transcription complex subunit 10 [OS=Homo sapiens]	6.74206	0.989	3.06736	6.25944	0.756	9.54304	0.0213169	0.0421227	Enriched	Rejected
P31146	Coronin-1A [OS=Homo sapiens]	2.13809	0.955	2.11735	2.3963	0.756	12.4435	0.0302766	0.0421527	Rejected	Rejected
P27635	60S ribosomal protein L10 [OS=Homo sapiens]	1.53525	0.914	1.62867	2.7224	0.756	4.51971	0.0368912	0.0421828	Rejected	Rejected
P30048	Thioredoxin-dependent peroxide reductase, mitochondrial [OS=Homo sapiens]	2.81914	0.888	3.47695	1.21272	0.756	1.48051	0.0401082	0.0422129	Rejected	Rejected
Q6P5S2	Protein LEG1 homolog [OS=Homo sapiens]	1.75701	0.804	3.14302	3.60093	0.754	32.0471	0.0485268	0.0422429	Rejected	Rejected
Q9UK59	lariat debranching enzyme [OS=Homo sapiens]	1.00385	0.524	1.18035	1.11221	0.754	1.28492	0.0664762	0.042273	Rejected	Rejected
O75832	26S proteasome non-ATPase regulatory subunit 10 [OS=Homo sapiens]	1.02633	0.51	1.38529	1.28128	0.754	1.6544	0.0673181	0.0423031	Rejected	Rejected
O60825-1	6-phosphofructo-2-kinase/fructose-2,6-bisphosphatase 2 [OS=Homo sapiens]	0.918631	0.409	1.54808	1.11447	0.754	1.29817	0.0712568	0.0423331	Rejected	Rejected
P06703	protein S100-A6 [OS=Homo sapiens]	5.98684	1	2.84428	1.57768	0.753	12.3227	0.012267	0.0423632	Enriched	Rejected
P01833	Polymeric immunoglobulin receptor [OS=Homo sapiens]	2.10745	0.866	2.98696	1.58299	0.753	20.2929	0.0423331	0.0423933	Rejected	Rejected
P30876	DNA-directed RNA polymerase II subunit RPB2 [OS=Homo sapiens]	5.64095	0.982	2.63344	1.35967	0.751	3.08561	0.0235418	0.0424233	Enriched	Rejected
Q92973-1	transportin-1 [OS=Homo sapiens]	10.5886	1	2.92553	2.32374	0.75	3.9588	0.00499098	0.0424534	Enriched	Rejected
P62330	ADP-ribosylation factor 6 [OS=Homo sapiens]	1.34196	0.962	1.31395	1.25293	0.75	1.68618	0.0292544	0.0424835	Rejected	Rejected
Q66K74	Microtubule-associated protein 1S [OS=Homo sapiens]	3.19022	0.873	3.61438	16.7274	0.75	25.5758	0.0417318	0.0425135	Rejected	Rejected
P35249	replication factor C subunit 4 [OS=Homo sapiens]	1.40068	0.527	3.03759	1.4737	0.749	2.25233	0.0661756	0.0425436	Rejected	Rejected
P13667	Protein disulfide-isomerase A4 [OS=Homo sapiens]	1.87989	0.673	4.09159	1.38589	0.748	2.31099	0.0576368	0.0425737	Rejected	Rejected
Q9BUQ8	Probable ATP-dependent RNA helicase DDX23 [OS=Homo sapiens]	4.29323	0.957	4.15714	1.94896	0.747	2.99574	0.0298857	0.0426037	Rejected	Rejected
Q9NR46-2	Isoform 2 of Endophilin-B2 [OS=Homo sapiens]	1.47797	0.675	3.60205	1.20782	0.747	1.53939	0.0576067	0.0426338	Rejected	Rejected
Q86U42-1	polyadenylate-binding protein 2 [OS=Homo sapiens]	0.665094	0.074	1.57348	1.68863	0.745	3.22826	0.0823812	0.0426639	Rejected	Rejected
P12429	annexin A3 [OS=Homo sapiens]	4.71028	0.882	5.92874	2.69712	0.744	12.6728	0.0408599	0.0426939	Rejected	Rejected
Q9UGM3-4	Isoform 4 of Deleted in malignant brain tumors 1 protein [OS=Homo sapiens]	2.58376	0.996	1.96455	2.29612	0.743	20.927	0.0163259	0.042724	Enriched	Rejected
Q6ZSR9	Uncharacterized protein FLJ45252 [OS=Homo sapiens]	0.5361	0.065	1.87649	1.17583	0.743	1.48624	0.0826819	0.0427541	Rejected	Rejected
P45880-1	Isoform 1 of Voltage-dependent anion-selective channel protein 2 [OS=Homo sapiens]	5.25524	0.995	3.97906	1.71171	0.742	2.79684	0.0166867	0.0427841	Enriched	Rejected
Q9NP79	Vacuolar protein sorting-associated protein VTA1 homolog [OS=Homo sapiens]	1.00124	0.51	1.41481	1.11949	0.741	1.32923	0.067288	0.0428142	Rejected	Rejected
Q7Z739	YTH domain-containing family protein 3 [OS=Homo sapiens]	1.52601	0.52	2.48805	1.51883	0.738	2.3158	0.0666566	0.0428443	Rejected	Rejected
O94925-3	Isoform 3 of Glutaminase kidney isoform, mitochondrial [OS=Homo sapiens]	9.54383	0.967	8.6935	2.5407	0.736	5.3962	0.0281118	0.0428743	Rejected	Rejected
P18615-3	Isoform 2 of Negative elongation factor E [OS=Homo sapiens]	0.969206	0.425	1.27539	1.07345	0.736	1.2014	0.0708659	0.0429044	Rejected	Rejected
Q99598	Translin-associated protein X [OS=Homo sapiens]	0.707431	0.082	1.49608	1.11286	0.736	1.32289	0.0820806	0.0429345	Rejected	Rejected
O95881	Thioredoxin domain-containing protein 12 [OS=Homo sapiens]	0.801348	0.056	1.27364	1.13535	0.736	1.37585	0.0829525	0.0429645	Rejected	Rejected
Q6WCQ1-2	Isoform 2 of Myosin phosphatase Rho-interacting protein [OS=Homo sapiens]	1.23729	0.832	1.40468	1.19773	0.734	1.57842	0.0457607	0.0429946	Rejected	Rejected
P46940	Ras GTPase-activating-like protein IQGAP1 [OS=Homo sapiens]	4.90548	1	2.72104	1.5309	0.733	2.59117	0.00132291	0.0430247	Enriched	Rejected
Q13263	Transcription intermediary factor 1-beta [OS=Homo sapiens]	5.75868	1	2.6807	1.58235	0.733	2.85911	0.00309681	0.0430547	Enriched	Rejected
O75947-1	ATP synthase subunit d, mitochondrial [OS=Homo sapiens]	21.407	1	3.84845	1.35403	0.733	2.44125	0.00802766	0.0430848	Enriched	Rejected
O60762	Dolichol-phosphate mannosyltransferase subunit 1 [OS=Homo sapiens]	2.65782	0.724	3.00292	1.30112	0.733	1.77756	0.0545701	0.0431149	Rejected	Rejected
Q5VZE5	N-alpha-acetyltransferase 35, NatC auxiliary subunit [OS=Homo sapiens]	0.979439	0.488	1.4374	1.13753	0.733	1.39213	0.0683403	0.0431449	Rejected	Rejected
A6NHR9-1	structural maintenance of chromosomes flexible hinge domain-containing protein 1 [OS=Homo sapiens]	3.28722	0.776	4.6107	1.72812	0.732	6.87846	0.0511425	0.043175	Rejected	Rejected
Q92797-1	Symplekin [OS=Homo sapiens]	7.99427	0.905	8.95954	2.11587	0.731	5.00377	0.0383945	0.0432051	Rejected	Rejected
O60832-1	H/ACA ribonucleoprotein complex subunit 4 [OS=Homo sapiens]	103.053	0.889	109.775	1.32078	0.731	1.53992	0.0398978	0.0432351	Rejected	Rejected
P30481	HLA class I histocompatibility antigen, B-44 alpha chain [OS=Homo sapiens]	0.443828	0.106	3.17227	2.83847	0.731	4.08162	0.0808178	0.0432652	Rejected	Rejected
P04908	histone H2A type 1-B/E [OS=Homo sapiens]	2.85588	0.835	3.30837	1.39644	0.729	1.98063	0.0453698	0.0432952	Rejected	Rejected
Q9H2U1	ATP-dependent RNA helicase DHX36 [OS=Homo sapiens]	0.643355	0.262	2.9337	1.67935	0.729	5.42952	0.0753458	0.0433253	Rejected	Rejected
P23634-1	Plasma membrane calcium-transporting ATPase 4 [OS=Homo sapiens]	0.861302	0.178	1.26645	1.16158	0.729	1.38239	0.078172	0.0433554	Rejected	Rejected
Q8N9T8	Protein KRI1 homolog [OS=Homo sapiens]	1.1983	0.759	1.40705	1.25934	0.728	1.70011	0.0524654	0.0433854	Rejected	Rejected
O95983-1	methyl-CpG-binding domain protein 3 [OS=Homo sapiens]	1.08068	0.637	1.39897	1.21736	0.728	1.69169	0.0597114	0.0434155	Rejected	Rejected
Q96QK1	Vacuolar protein sorting-associated protein 35 [OS=Homo sapiens]	7.88378	1	2.61789	1.41292	0.727	2.82528	0.00345761	0.0434456	Enriched	Rejected
O95376	E3 ubiquitin-protein ligase ARIH2 [OS=Homo sapiens]	1.19602	0.748	1.58128	1.92076	0.727	2.32869	0.0531569	0.0434756	Rejected	Rejected
P0C0S5	Histone H2A.Z [OS=Homo sapiens]	28.5672	1	2.58032	1.68957	0.726	12.1299	0.00799759	0.0435057	Enriched	Rejected
Q10713	Mitochondrial-processing peptidase subunit alpha [OS=Homo sapiens]	2.85043	0.938	2.91204	3.27335	0.726	8.63647	0.0330126	0.0435358	Rejected	Rejected
P61254	60S ribosomal protein L26 [OS=Homo sapiens]	0.935651	0.431	1.71135	1.60456	0.726	2.30708	0.0707156	0.0435658	Rejected	Rejected
Q9BXY0	Protein MAK16 homolog [OS=Homo sapiens]	0.987171	0.482	1.19967	1.08008	0.725	1.234	0.0686109	0.0435959	Rejected	Rejected
O60287	nucleolar pre-ribosomal-associated protein 1 [OS=Homo sapiens]	0.873643	0.196	1.29716	1.10142	0.725	1.29743	0.0778413	0.043626	Rejected	Rejected
Q96S52	GPI transamidase component PIG-S [OS=Homo sapiens]	0.807189	0.16	1.35931	1.13883	0.725	1.46265	0.0789537	0.043656	Rejected	Rejected
P61026	ras-related protein rab-10 [OS=Homo sapiens]	6.454	1	3.20818	1.46309	0.724	2.79075	0.00926037	0.0436861	Enriched	Rejected
Q03001-7	dystonin [OS=Homo sapiens]	5.04891	0.999	3.24858	2.45722	0.724	5.1682	0.0129585	0.0437162	Enriched	Rejected
Q9Y371-2	Isoform 2 of Endophilin-B1 [OS=Homo sapiens]	3.1875	0.903	3.56037	1.22984	0.724	1.70387	0.038635	0.0437462	Rejected	Rejected
Q6DD88	Atlastin-3 [OS=Homo sapiens]	1.29723	0.765	1.8134	1.58773	0.724	5.25578	0.0520746	0.0437763	Rejected	Rejected
Q13123	Protein Red [OS=Homo sapiens]	1.57556	0.778	1.92528	1.18562	0.723	1.53987	0.0510222	0.0438064	Rejected	Rejected
Q9NR50-1	Translation initiation factor eIF-2B subunit gamma [OS=Homo sapiens]	0.861396	0.258	1.43554	1.1645	0.723	1.50503	0.0755863	0.0438364	Rejected	Rejected
P19878	Neutrophil cytosol factor 2 [OS=Homo sapiens]	0.904556	0.253	1.24585	1.16825	0.723	1.48465	0.075917	0.0438665	Rejected	Rejected
P22307-1	Non-specific lipid-transfer protein [OS=Homo sapiens]	0.800987	0.186	1.54926	1.70359	0.722	3.4642	0.0779615	0.0438966	Rejected	Rejected
Q8WUA2	Peptidyl-prolyl cis-trans isomerase-like 4 [OS=Homo sapiens]	2.29339	0.96	2.24815	1.42561	0.719	1.99602	0.0294949	0.0439266	Rejected	Rejected
Q86U44	N6-adenosine-methyltransferase 70 kDa subunit [OS=Homo sapiens]	1.68492	0.77	1.92886	3.08578	0.719	4.31143	0.0517138	0.0439567	Rejected	Rejected
P36551	Oxygen-dependent coproporphyrinogen-III oxidase, mitochondrial [OS=Homo sapiens]	1.24359	0.577	3.01872	1.84434	0.719	3.46523	0.0632892	0.0439868	Rejected	Rejected
Q9Y3D6	mitochondrial fission 1 protein [OS=Homo sapiens]	1.58387	0.534	2.31321	1.08725	0.719	1.26767	0.0657547	0.0440168	Rejected	Rejected
P15374	Ubiquitin carboxyl-terminal hydrolase isozyme L3 [OS=Homo sapiens]	3.44623	0.964	3.03841	4.9726	0.718	6.38996	0.0289236	0.0440469	Rejected	Rejected
Q9UHY7	Enolase-phosphatase E1 [OS=Homo sapiens]	2.69278	0.927	2.8422	2.79573	0.718	5.83091	0.0347565	0.044077	Rejected	Rejected
P14678-3	Isoform SM-B1 of Small nuclear ribonucleoprotein-associated proteins B and B' [OS=Homo sapiens]	2.05712	0.902	2.13993	7.67979	0.718	11.2475	0.0387553	0.044107	Rejected	Rejected
Q15424-3	Isoform 3 of Scaffold attachment factor B1 [OS=Homo sapiens]	1.45283	0.781	2.15956	3.97614	0.718	15.5547	0.0505713	0.0441371	Rejected	Rejected
Q9NVU7	Protein SDA1 homolog [OS=Homo sapiens]	2.13085	0.725	3.14827	1.68864	0.718	2.17334	0.0545099	0.0441672	Rejected	Rejected
Q15287-1	RNA-binding protein with serine-rich domain 1 [OS=Homo sapiens]	11.4872	0.985	7.8694	1.58124	0.717	4.63617	0.0228202	0.0441972	Enriched	Rejected
Q15165-1	Isoform 1 of Serum paraoxonase/arylesterase 2 [OS=Homo sapiens]	0.31103	0.02	3.07506	1.13754	0.717	1.44051	0.0847565	0.0442273	Rejected	Rejected
P17213	Bactericidal permeability-increasing protein [OS=Homo sapiens]	4.17537	0.779	8.68042	1.53323	0.716	11.6304	0.0509922	0.0442574	Rejected	Rejected
Q5T6F2	Ubiquitin-associated protein 2 [OS=Homo sapiens]	1.17554	0.693	1.68681	1.81407	0.716	3.00008	0.0565244	0.0442874	Rejected	Rejected
O94760-1	N(G),N(G)-dimethylarginine dimethylaminohydrolase 1 [OS=Homo sapiens]	3.36978	1	2.25423	1.09679	0.715	1.28828	0.0116657	0.0443175	Enriched	Rejected
P11766	alcohol dehydrogenase class-3 [OS=Homo sapiens]	1.75783	0.497	8.17823	1.4936	0.715	3.77085	0.0678894	0.0443476	Rejected	Rejected
P20618	proteasome subunit beta type-1 [OS=Homo sapiens]	2.68097	1	1.90121	1.39374	0.713	3.03224	0.00580277	0.0443776	Enriched	Rejected
Q14232	Translation initiation factor eIF-2B subunit alpha [OS=Homo sapiens]	0.730507	0.078	1.43106	2.5931	0.713	15.3894	0.0822309	0.0444077	Rejected	Rejected
Q9NRW7	Vacuolar protein sorting-associated protein 45 [OS=Homo sapiens]	1.33822	0.92	1.40313	1.09574	0.712	1.31563	0.0361395	0.0444378	Rejected	Rejected
Q96L91	E1A-binding protein p400 [OS=Homo sapiens]	1.15589	0.875	1.20934	1.16051	0.712	1.44744	0.0415213	0.0444678	Rejected	Rejected
Q86XZ4	Spermatogenesis-associated serine-rich protein 2 [OS=Homo sapiens]	1.20955	0.783	1.49033	1.15248	0.712	1.48447	0.050451	0.0444979	Rejected	Rejected
P42126	Enoyl-CoA delta isomerase 1, mitochondrial [OS=Homo sapiens]	7.67607	0.565	8.53026	1.57065	0.712	9.26434	0.0638605	0.044528	Rejected	Rejected
P61916	Epididymal secretory protein E1 [OS=Homo sapiens]	6.66794	1	2.42778	1.35142	0.711	2.44575	0.0108238	0.044558	Enriched	Rejected
O43813	LanC-like protein 1 [OS=Homo sapiens]	2.70399	0.827	3.66204	1.51211	0.711	2.68057	0.0462117	0.0445881	Rejected	Rejected
O75937	DnaJ homolog subfamily C member 8 [OS=Homo sapiens]	1.16943	0.634	2.06039	1.18482	0.711	1.73853	0.059982	0.0446182	Rejected	Rejected
P50750-2	Isoform 2 of Cyclin-dependent kinase 9 [OS=Homo sapiens]	1.29619	0.587	2.16705	1.05653	0.711	1.16942	0.0626278	0.0446482	Rejected	Rejected
P06493	Cyclin-dependent kinase 1 [OS=Homo sapiens]	3.52719	0.993	2.34834	1.58676	0.71	2.85808	0.0186109	0.0446783	Enriched	Rejected
O14578-4	Isoform 4 of Citron Rho-interacting kinase [OS=Homo sapiens]	1.3095	0.923	1.33909	1.11857	0.709	1.38181	0.0357186	0.0447084	Rejected	Rejected
Q9P0J0-2	Isoform 2 of NADH dehydrogenase [ubiquinone] 1 alpha subcomplex subunit 13 [OS=Homo sapiens]	1.15754	0.825	1.26834	1.12926	0.709	1.42144	0.0464823	0.0447384	Rejected	Rejected
Q99729-3	Isoform 3 of Heterogeneous nuclear ribonucleoprotein A/B [OS=Homo sapiens]	4.68123	1	2.53666	7.07893	0.707	11.6907	0.00736621	0.0447685	Enriched	Rejected
Q06323-1	Proteasome activator complex subunit 1 [OS=Homo sapiens]	10.6669	1	5.20316	1.36626	0.706	2.44812	0.00484065	0.0447986	Enriched	Rejected
P48735	Isocitrate dehydrogenase [NADP], mitochondrial [OS=Homo sapiens]	16.9035	0.791	20.6683	1.16245	0.706	1.50104	0.0496091	0.0448286	Rejected	Rejected
Q9BT78	COP9 signalosome complex subunit 4 [OS=Homo sapiens]	2.44657	0.774	4.13874	1.49206	0.706	2.73456	0.051353	0.0448587	Rejected	Rejected
Q00059	Transcription factor A, mitochondrial [OS=Homo sapiens]	0.737885	0.212	2.12237	1.46309	0.706	3.44111	0.07727	0.0448888	Rejected	Rejected
O75822	Eukaryotic translation initiation factor 3 subunit J [OS=Homo sapiens]	3.54383	0.753	5.84402	1.49142	0.705	3.45494	0.0527962	0.0449188	Rejected	Rejected
Q9H0C8	Integrin-linked kinase-associated serine/threonine phosphatase 2C [OS=Homo sapiens]	1.35831	0.618	2.1328	1.26763	0.705	1.89088	0.0608839	0.0449489	Rejected	Rejected
Q9UPN7	Serine/threonine-protein phosphatase 6 regulatory subunit 1 [OS=Homo sapiens]	2.04948	0.777	2.35843	1.97411	0.703	6.43734	0.0511124	0.044979	Rejected	Rejected
Q16513	Serine/threonine-protein kinase N2 [OS=Homo sapiens]	0.902772	0.345	1.5224	3.64396	0.703	5.92758	0.0731209	0.045009	Rejected	Rejected
O15400	Syntaxin-7 [OS=Homo sapiens]	0.792564	0.11	1.36089	1.30034	0.703	2.59304	0.0807276	0.0450391	Rejected	Rejected
P49643-1	DNA primase large subunit [OS=Homo sapiens]	0.707211	0.074	1.47467	1.0869	0.703	1.30452	0.0824113	0.0450692	Rejected	Rejected
P08134	Rho-related GTP-binding protein RhoC [OS=Homo sapiens]	1.45283	0.89	1.92269	8.08254	0.702	10.9324	0.0397474	0.0450992	Rejected	Rejected
Q8IXQ6	Poly [ADP-ribose] polymerase 9 [OS=Homo sapiens]	2.14977	0.839	2.5027	1.12589	0.702	1.41296	0.045009	0.0451293	Rejected	Rejected
O43169	Cytochrome b5 type B [OS=Homo sapiens]	0.627938	0.205	2.33945	1.33725	0.702	2.20813	0.0775105	0.0451594	Rejected	Rejected
O75157	TSC22 domain family protein 2 [OS=Homo sapiens]	1.63887	0.975	1.56535	1.15017	0.701	1.49975	0.0258268	0.0451894	Enriched	Rejected
Q9NY27	Serine/threonine-protein phosphatase 4 regulatory subunit 2 [OS=Homo sapiens]	0.856453	0.278	1.48319	1.08668	0.701	1.29173	0.074985	0.0452195	Rejected	Rejected
P22033	Methylmalonyl-CoA mutase, mitochondrial [OS=Homo sapiens]	0.666996	0.096	1.70595	1.22853	0.701	1.6466	0.081359	0.0452495	Rejected	Rejected
P29084	transcription initiation factor iie subunit beta [OS=Homo sapiens]	1.258	0.831	1.49148	1.12549	0.7	1.41947	0.045911	0.0452796	Rejected	Rejected
P57088	Transmembrane protein 33 [OS=Homo sapiens]	1.45867	0.749	1.82383	1.41056	0.7	2.73469	0.0530667	0.0453097	Rejected	Rejected
Q01433-1	AMP deaminase 2 [OS=Homo sapiens]	3.7434	0.977	2.91006	1.27006	0.699	2.24193	0.0252255	0.0453397	Enriched	Rejected
P05091	Aldehyde dehydrogenase, mitochondrial [OS=Homo sapiens]	4.22991	0.991	3.35007	1.72656	0.698	6.34701	0.0202946	0.0453698	Enriched	Rejected
Q9Y657	Spindlin-1 [OS=Homo sapiens]	0.988518	0.477	1.31946	1.10031	0.698	1.31537	0.0687913	0.0453999	Rejected	Rejected
P17252	Protein kinase C alpha type [OS=Homo sapiens]	0.74144	0.301	1.8575	3.79101	0.698	4.84198	0.0741431	0.0454299	Rejected	Rejected
Q9H1E1	Ribonuclease 7 [OS=Homo sapiens]	4.23562	1	2.05126	1.20581	0.695	1.7467	0.0121768	0.04546	Enriched	Rejected
P31153	S-adenosylmethionine synthase isoform type-2 [OS=Homo sapiens]	27.5541	0.999	4.83743	8.98036	0.695	32.5159	0.0129284	0.0454901	Enriched	Rejected
O75494-1	Serine/arginine-rich splicing factor 10 [OS=Homo sapiens]	4.72161	0.856	5.12737	6.22942	0.695	7.68363	0.0433253	0.0455201	Rejected	Rejected
P36969	Phospholipid hydroperoxide glutathione peroxidase, mitochondrial [OS=Homo sapiens]	10.1678	0.886	17.1516	1.17485	0.694	1.5706	0.040469	0.0455502	Rejected	Rejected
O60828	Polyglutamine-binding protein 1 [OS=Homo sapiens]	1.39008	0.7	1.99573	1.33196	0.694	1.85891	0.0562538	0.0455803	Rejected	Rejected
P13995	Bifunctional methylenetetrahydrofolate dehydrogenase/cyclohydrolase, mitochondrial [OS=Homo sapiens]	5.02666	0.973	3.47231	1.45705	0.693	2.81391	0.0266386	0.0456103	Rejected	Rejected
Q9BZE1	39S ribosomal protein L37, mitochondrial [OS=Homo sapiens]	0.872727	0.258	1.40345	1.13884	0.693	1.55417	0.0756464	0.0456404	Rejected	Rejected
O60437	periplakin [OS=Homo sapiens]	0.646346	0.167	2.0244	1.4039	0.693	2.78372	0.0785628	0.0456705	Rejected	Rejected
P00492	Hypoxanthine-guanine phosphoribosyltransferase [OS=Homo sapiens]	0.713924	0.021	1.29463	2.87695	0.693	5.51526	0.0846963	0.0457005	Rejected	Rejected
A0AVT1-1	Ubiquitin-like modifier-activating enzyme 6 [OS=Homo sapiens]	2.82185	1	1.60698	1.30166	0.692	2.57827	0.00490078	0.0457306	Enriched	Rejected
P42677	40S ribosomal protein S27 [OS=Homo sapiens]	10.6079	1	3.92321	2.46767	0.692	6.78552	0.00911004	0.0457607	Enriched	Rejected
Q6PI48	Aspartate--tRNA ligase, mitochondrial [OS=Homo sapiens]	15.6638	0.578	20.01	4.83649	0.69	11.9589	0.0632592	0.0457907	Rejected	Rejected
P10909-2	Isoform 2 of Clusterin [OS=Homo sapiens]	0.889501	0.359	1.47144	1.20537	0.69	4.10222	0.0726097	0.0458208	Rejected	Rejected
P27144	Adenylate kinase 4, mitochondrial [OS=Homo sapiens]	1.33444	0.858	1.51773	1.11877	0.689	1.51517	0.043175	0.0458509	Rejected	Rejected
P50395-1	Rab GDP dissociation inhibitor beta [OS=Homo sapiens]	4.53632	1	2.10461	1.45085	0.688	2.4258	0.00102225	0.0458809	Enriched	Rejected
P04083	annexin A1 [OS=Homo sapiens]	4.24882	1	2.29265	2.06875	0.688	5.2715	0.0019543	0.045911	Enriched	Rejected
P49821	NADH dehydrogenase [ubiquinone] flavoprotein 1, mitochondrial [OS=Homo sapiens]	1.24869	0.873	1.3506	1.12564	0.688	1.44849	0.0417619	0.0459411	Rejected	Rejected
Q96S66	chloride channel CLIC-like protein 1 [OS=Homo sapiens]	0.933842	0.34	1.30066	1.13673	0.685	1.48738	0.0731509	0.0459711	Rejected	Rejected
Q08170	Serine/arginine-rich splicing factor 4 [OS=Homo sapiens]	0.755086	0.114	1.44251	1.11678	0.685	1.48347	0.0806675	0.0460012	Rejected	Rejected
Q9P2E9-1	Ribosome-binding protein 1 [OS=Homo sapiens]	3.23117	0.99	2.38871	1.35181	0.684	2.06381	0.020475	0.0460313	Enriched	Rejected
P08246	Neutrophil elastase [OS=Homo sapiens]	3.75324	0.955	3.67	58.3184	0.684	163.379	0.0303668	0.0460613	Rejected	Rejected
Q8IZP0	abl interactor 1 [OS=Homo sapiens]	1.76834	0.898	2.12199	1.34386	0.684	2.6166	0.0392664	0.0460914	Rejected	Rejected
P53990-5	Isoform 5 of IST1 homolog [OS=Homo sapiens]	1.31809	0.657	2.49873	1.41386	0.683	3.18639	0.0584787	0.0461215	Rejected	Rejected
Q96GD0	Pyridoxal phosphate phosphatase [OS=Homo sapiens]	0.691489	0.07	1.5619	1.08997	0.683	1.29832	0.0824714	0.0461515	Rejected	Rejected
Q969Z0-1	Protein TBRG4 [OS=Homo sapiens]	1.05246	0.582	1.37821	2.80255	0.682	3.67769	0.0630186	0.0461816	Rejected	Rejected
P62750	60S ribosomal protein L23a [OS=Homo sapiens]	15.4118	0.995	3.92782	1.46518	0.679	5.68713	0.0167168	0.0462117	Enriched	Rejected
P30040-1	Endoplasmic reticulum resident protein 29 [OS=Homo sapiens]	4.67599	0.81	7.73575	1.31288	0.679	2.44004	0.0481058	0.0462417	Rejected	Rejected
Q14790-9	Isoform 9 of Caspase-8 [OS=Homo sapiens]	1.53593	0.596	2.30738	1.11677	0.679	1.44255	0.0622369	0.0462718	Rejected	Rejected
Q9UKR5	probable ergosterol biosynthetic protein 28 [OS=Homo sapiens]	1.82562	0.548	2.92108	2.10578	0.679	3.09617	0.0649429	0.0463019	Rejected	Rejected
P39748	Flap endonuclease 1 [OS=Homo sapiens]	3.61968	0.888	6.38101	1.36325	0.678	2.49509	0.0400782	0.0463319	Rejected	Rejected
Q9UEU0	vesicle transport through interaction with t-SNAREs homolog 1B [OS=Homo sapiens]	0.912297	0.313	1.36068	1.27189	0.678	2.14767	0.0737823	0.046362	Rejected	Rejected
Q9Y3D0	Mitotic spindle-associated MMXD complex subunit MIP18 [OS=Homo sapiens]	1.1207	0.618	1.70983	2.36909	0.677	2.91631	0.060914	0.0463921	Rejected	Rejected
P08559-4	Isoform 4 of Pyruvate dehydrogenase E1 component subunit alpha, somatic form, mitochondrial [OS=Homo sapiens]	2.24692	0.508	6.04351	2.65018	0.676	5.00387	0.0674384	0.0464221	Rejected	Rejected
Q9Y2Z4	Tyrosine--tRNA ligase, mitochondrial [OS=Homo sapiens]	8.60748	0.936	9.1547	3.14565	0.675	14.4472	0.0332832	0.0464522	Rejected	Rejected
P51659-1	peroxisomal multifunctional enzyme type 2 [OS=Homo sapiens]	2.08573	0.924	2.41743	1.20923	0.675	2.4438	0.0351774	0.0464823	Rejected	Rejected
Q9Y3C6	Peptidyl-prolyl cis-trans isomerase-like 1 [OS=Homo sapiens]	0.992792	0.494	1.2427	1.12081	0.675	1.48775	0.0680397	0.0465123	Rejected	Rejected
Q8IX90	Spindle and kinetochore-associated protein 3 [OS=Homo sapiens]	0.614145	0.06	1.68203	1.11697	0.675	1.49598	0.0828924	0.0465424	Rejected	Rejected
Q14203	Dynactin subunit 1 [OS=Homo sapiens]	6.71711	0.998	4.17737	1.75678	0.674	2.89593	0.0137703	0.0465725	Enriched	Rejected
Q13011	Delta(3,5)-Delta(2,4)-dienoyl-CoA isomerase, mitochondrial [OS=Homo sapiens]	2.32558	0.891	2.58738	1.18425	0.673	1.933	0.0397174	0.0466025	Rejected	Rejected
Q9NYH9	U3 small nucleolar RNA-associated protein 6 homolog [OS=Homo sapiens]	1.21699	0.776	1.48491	1.15266	0.673	1.63308	0.0512327	0.0466326	Rejected	Rejected
Q9BPW8	Protein NipSnap homolog 1 [OS=Homo sapiens]	0.87523	0.265	1.37832	1.04588	0.673	1.12613	0.0753157	0.0466627	Rejected	Rejected
Q13177	Serine/threonine-protein kinase PAK 2 [OS=Homo sapiens]	0.589327	0.231	21.4354	2.04525	0.673	4.30955	0.0765785	0.0466927	Rejected	Rejected
P09651-1	Heterogeneous nuclear ribonucleoprotein A1 [OS=Homo sapiens]	3.03573	1	2.12175	1.24674	0.672	2.17265	0.0016837	0.0467228	Enriched	Rejected
O96000	NADH dehydrogenase [ubiquinone] 1 beta subcomplex subunit 10 [OS=Homo sapiens]	110.901	0.864	120.209	11.3337	0.672	13.3519	0.0425135	0.0467529	Rejected	Rejected
P30566	adenylosuccinate lyase [OS=Homo sapiens]	0.965471	0.433	1.28631	6.25754	0.672	7.04655	0.0705953	0.0467829	Rejected	Rejected
P39687	Acidic leucine-rich nuclear phosphoprotein 32 family member A [OS=Homo sapiens]	7.44657	0.966	6.9273	1.9955	0.671	4.85097	0.0284426	0.046813	Rejected	Rejected
O95801	Tetratricopeptide repeat protein 4 [OS=Homo sapiens]	2.33863	0.938	2.362	1.12891	0.671	2.13893	0.0330728	0.0468431	Rejected	Rejected
Q92692-1	Nectin-2 [OS=Homo sapiens]	0.915903	0.374	1.47208	1.09005	0.671	1.38319	0.0721888	0.0468731	Rejected	Rejected
P62993	Growth factor receptor-bound protein 2 [OS=Homo sapiens]	3.8974	0.99	2.40753	1.16523	0.67	1.76286	0.0207757	0.0469032	Enriched	Rejected
Q9Y696	Chloride intracellular channel protein 4 [OS=Homo sapiens]	9.16255	1	3.60088	1.25719	0.669	2.06748	0.0038184	0.0469333	Enriched	Rejected
Q08AF3-1	schlafen family member 5 [OS=Homo sapiens]	1.45635	0.93	1.50667	1.09094	0.668	1.40345	0.0342453	0.0469633	Rejected	Rejected
P36776	Lon protease homolog, mitochondrial [OS=Homo sapiens]	0.963495	0.307	1.1252	9.27342	0.668	12.2915	0.0738725	0.0469934	Rejected	Rejected
Q9UBC9	Small proline-rich protein 3 [OS=Homo sapiens]	13.1963	0.986	9.08639	2.05888	0.667	6.14032	0.0225195	0.0470235	Enriched	Rejected
P48723	Heat shock 70 kDa protein 13 [OS=Homo sapiens]	4.56685	0.921	5.13529	1.25867	0.667	2.20215	0.0359892	0.0470535	Rejected	Rejected
Q96CN7	Isochorismatase domain-containing protein 1 [OS=Homo sapiens]	1.27772	0.919	1.32433	1.12299	0.667	1.52944	0.0363199	0.0470836	Rejected	Rejected
Q9BS26	Endoplasmic reticulum resident protein 44 [OS=Homo sapiens]	18.7552	0.989	14.0212	1.31666	0.666	2.56779	0.0209561	0.0471137	Enriched	Rejected
Q9BQ39	ATP-dependent RNA helicase DDX50 [OS=Homo sapiens]	1.0676	0.635	1.38159	1.07282	0.666	1.40108	0.0598918	0.0471437	Rejected	Rejected
Q14669-3	Isoform 3 of E3 ubiquitin-protein ligase TRIP12 [OS=Homo sapiens]	1.97197	0.82	2.35509	1.10274	0.665	1.47613	0.0470235	0.0471738	Rejected	Rejected
Q15836	Vesicle-associated membrane protein 3 [OS=Homo sapiens]	3.54304	0.818	4.41924	1.35912	0.664	5.25327	0.0474143	0.0472038	Rejected	Rejected
Q7L4I2-1	Arginine/serine-rich coiled-coil protein 2 [OS=Homo sapiens]	1.01362	0.541	1.34328	1.07328	0.664	1.29163	0.0654239	0.0472339	Rejected	Rejected
Q9NVM6	DnaJ homolog subfamily C member 17 [OS=Homo sapiens]	0.931289	0.367	1.33756	1.11494	0.664	1.49042	0.0723993	0.047264	Rejected	Rejected
P42696	RNA-binding protein 34 [OS=Homo sapiens]	0.852129	0.244	1.52751	1.09169	0.664	1.37025	0.0762477	0.047294	Rejected	Rejected
Q9Y6E2	Basic leucine zipper and W2 domain-containing protein 2 [OS=Homo sapiens]	0.483432	0.008	1.63045	1.33868	0.663	1.97615	0.0853879	0.0473241	Rejected	Rejected
P0DOX8	Immunoglobulin lambda-1 light chain [OS=Homo sapiens]	3.91436	0.967	3.73499	1.3004	0.662	7.31231	0.0282321	0.0473542	Rejected	Rejected
Q9Y3D8	Adenylate kinase isoenzyme 6 [OS=Homo sapiens]	1.4374	0.935	1.46537	1.09736	0.662	1.34635	0.0335238	0.0473842	Rejected	Rejected
O95793	double-stranded RNA-binding protein Staufen homolog 1 [OS=Homo sapiens]	1.65142	0.564	3.45113	1.30621	0.662	3.30186	0.0638906	0.0474143	Rejected	Rejected
Q96PZ0	pseudouridylate synthase 7 homolog [OS=Homo sapiens]	0.887755	0.26	1.33564	1.71071	0.662	2.08709	0.0754961	0.0474444	Rejected	Rejected
Q16527	Cysteine and glycine-rich protein 2 [OS=Homo sapiens]	19.5576	0.993	14.2516	1.32652	0.659	2.53593	0.019092	0.0474744	Enriched	Rejected
P55196-5	Isoform 5 of Afadin [OS=Homo sapiens]	2.90965	0.932	2.99569	2.10135	0.659	2.91693	0.0338244	0.0475045	Rejected	Rejected
Q4VC31	coiled-coil domain-containing protein 58 [OS=Homo sapiens]	1.63227	0.631	2.82944	3.75365	0.659	8.24929	0.0602526	0.0475346	Rejected	Rejected
Q9BRZ2-1	E3 ubiquitin-protein ligase TRIM56 [OS=Homo sapiens]	1.62967	0.811	2.18397	1.3118	0.658	4.43638	0.0480156	0.0475646	Rejected	Rejected
P18084	Integrin beta-5 [OS=Homo sapiens]	0.870991	0.307	1.49793	1.10066	0.658	1.46594	0.0739026	0.0475947	Rejected	Rejected
O96008	Mitochondrial import receptor subunit TOM40 homolog [OS=Homo sapiens]	0.59877	0.291	1.94505	1.27458	0.658	2.22939	0.0745039	0.0476248	Rejected	Rejected
P57105	Synaptojanin-2-binding protein [OS=Homo sapiens]	0.721418	0.093	1.48373	1.98479	0.658	4.49376	0.0814793	0.0476548	Rejected	Rejected
P07954	fumarate hydratase, mitochondrial [OS=Homo sapiens]	5.36138	0.989	3.1027	1.32995	0.656	3.98254	0.0210463	0.0476849	Enriched	Rejected
Q9UBM7	7-dehydrocholesterol reductase [OS=Homo sapiens]	1.48839	0.84	1.85184	1.09469	0.656	1.52841	0.044979	0.047715	Rejected	Rejected
A1L0T0	Acetolactate synthase-like protein [OS=Homo sapiens]	1.30035	0.719	1.73119	1.1224	0.656	1.49575	0.0550812	0.047745	Rejected	Rejected
P42704	Leucine-rich PPR motif-containing protein, mitochondrial [OS=Homo sapiens]	5.59762	1	2.28922	1.18208	0.655	1.81949	0.000871918	0.0477751	Enriched	Rejected
Q7Z7H8-2	Isoform 2 of 39S ribosomal protein L10, mitochondrial [OS=Homo sapiens]	1.9752	0.818	2.70836	1.10467	0.655	1.53035	0.0474444	0.0478052	Rejected	Rejected
Q9Y6W5	Wiskott-Aldrich syndrome protein family member 2 [OS=Homo sapiens]	1.12291	0.666	1.56891	10.2343	0.655	14.3766	0.0580277	0.0478352	Rejected	Rejected
Q14676	Mediator of DNA damage checkpoint protein 1 [OS=Homo sapiens]	1.22943	0.885	1.33206	1.10687	0.654	1.37262	0.0405592	0.0478653	Rejected	Rejected
Q9UNF0	Protein kinase C and casein kinase substrate in neurons protein 2 [OS=Homo sapiens]	8.209	1	2.90407	1.31597	0.653	2.37238	0.0100421	0.0478954	Enriched	Rejected
P34896-1	Serine hydroxymethyltransferase, cytosolic [OS=Homo sapiens]	6.35725	0.976	3.96858	1.51595	0.652	4.67332	0.0255562	0.0479254	Enriched	Rejected
Q9Y570-4	Isoform 4 of Protein phosphatase methylesterase 1 [OS=Homo sapiens]	13.3549	1	5.49041	1.44045	0.651	5.27561	0.00712568	0.0479555	Enriched	Rejected
Q9Y512	sorting and assembly machinery component 50 homolog [OS=Homo sapiens]	10.8586	0.9	11.5931	6.39663	0.651	7.6343	0.0391161	0.0479856	Rejected	Rejected
Q9NXR7-1	Isoform 1 of BRISC and BRCA1-A complex member 2 [OS=Homo sapiens]	1.08135	0.634	1.37881	1.02689	0.65	1.24018	0.0600421	0.0480156	Rejected	Rejected
Q15651-1	High mobility group nucleosome-binding domain-containing protein 3 [OS=Homo sapiens]	0.986288	0.432	1.16691	1.05156	0.649	1.29602	0.0706855	0.0480457	Rejected	Rejected
Q13509	tubulin beta-3 chain [OS=Homo sapiens]	2.12075	0.882	2.53287	5.20192	0.648	30.9499	0.0407697	0.0480758	Rejected	Rejected
P07384	Calpain-1 catalytic subunit [OS=Homo sapiens]	3.54977	1	2.12233	1.20679	0.646	1.71139	0.00450992	0.0481058	Enriched	Rejected
Q8NCA5	protein FAM98A [OS=Homo sapiens]	1.08487	0.627	1.34461	1.11759	0.646	1.51296	0.0604931	0.0481359	Rejected	Rejected
P01116-2	Isoform 2B of GTPase KRas [OS=Homo sapiens]	0.966952	0.44	1.29717	1.89837	0.645	2.27635	0.0703247	0.048166	Rejected	Rejected
O76094	Signal recognition particle subunit SRP72 [OS=Homo sapiens]	0.634873	0.295	3.58793	1.22932	0.644	3.65877	0.0742634	0.048196	Rejected	Rejected
Q13555-6	Isoform 6 of Calcium/calmodulin-dependent protein kinase type II subunit gamma [OS=Homo sapiens]	0.939972	0.347	1.22628	4.235	0.643	5.72032	0.0730307	0.0482261	Rejected	Rejected
P31947-1	14-3-3 protein sigma [OS=Homo sapiens]	5.32502	1	2.6887	1.18602	0.642	2.40559	0.00216476	0.0482562	Enriched	Rejected
P34932	Heat shock 70 kDa protein 4 [OS=Homo sapiens]	10.0199	1	2.11676	1.11061	0.641	1.58196	0.000691521	0.0482862	Enriched	Rejected
Q13636	ras-related protein rab-31 [OS=Homo sapiens]	5.01573	0.931	5.47058	1.14389	0.641	1.51026	0.0340649	0.0483163	Rejected	Rejected
O14773	Tripeptidyl-peptidase 1 [OS=Homo sapiens]	1.61329	0.917	1.98405	1.18034	0.641	3.29153	0.0365304	0.0483464	Rejected	Rejected
P49790-3	Isoform 3 of Nuclear pore complex protein Nup153 [OS=Homo sapiens]	1.52865	0.651	2.0869	1.1383	0.641	1.82662	0.0587793	0.0483764	Rejected	Rejected
P50542-4	Isoform 4 of Peroxisomal targeting signal 1 receptor [OS=Homo sapiens]	1.04182	0.598	1.30625	1.09023	0.641	1.48217	0.0621467	0.0484065	Rejected	Rejected
O75131	Copine-3 [OS=Homo sapiens]	1.03726	0.538	2.06452	1.43721	0.641	3.6406	0.0655141	0.0484366	Rejected	Rejected
Q7RTV0	PHD finger-like domain-containing protein 5A [OS=Homo sapiens]	1.79825	0.727	4.21463	4.99594	0.64	6.49979	0.0542694	0.0484666	Rejected	Rejected
Q8N3U4-2	Isoform 2 of Cohesin subunit SA-2 [OS=Homo sapiens]	0.993694	0.468	1.73109	1.22665	0.639	1.69638	0.0692123	0.0484967	Rejected	Rejected
P51148-2	Isoform 2 of Ras-related protein Rab-5C [OS=Homo sapiens]	7.98158	0.989	6.52627	2.10334	0.637	6.96065	0.0210162	0.0485268	Enriched	Rejected
Q96TA1	Niban-like protein 1 [OS=Homo sapiens]	1.20911	0.711	1.72266	6.09008	0.637	17.473	0.0556224	0.0485568	Rejected	Rejected
Q14151	scaffold attachment factor B2 [OS=Homo sapiens]	1.35986	0.929	1.40705	1.07783	0.636	1.49483	0.0343055	0.0485869	Rejected	Rejected
Q8N8S7	Protein enabled homolog [OS=Homo sapiens]	2.48361	0.994	1.8053	1.13311	0.635	1.74912	0.0179796	0.048617	Enriched	Rejected
Q9NZ45	CDGSH iron-sulfur domain-containing protein 1 [OS=Homo sapiens]	4.00021	0.993	2.54546	1.47176	0.634	4.89681	0.0192123	0.048647	Enriched	Rejected
O00139-2	Isoform 2 of Kinesin-like protein KIF2A [OS=Homo sapiens]	0.690695	0.092	1.55114	1.40166	0.634	1.69322	0.0815093	0.0486771	Rejected	Rejected
P36404	ADP-ribosylation factor-like protein 2 [OS=Homo sapiens]	3.14094	0.933	3.2756	1.08582	0.633	1.52419	0.0337041	0.0487072	Rejected	Rejected
P30533	alpha-2-macroglobulin receptor-associated protein [OS=Homo sapiens]	1.74634	0.844	2.02059	1.40239	0.633	2.42682	0.044528	0.0487372	Rejected	Rejected
Q9NRN7	L-aminoadipate-semialdehyde dehydrogenase-phosphopantetheinyl transferase [OS=Homo sapiens]	1.49631	0.783	1.94114	1.06719	0.633	1.38262	0.0503608	0.0487673	Rejected	Rejected
Q9H0A8-1	COMM domain-containing protein 4 [OS=Homo sapiens]	1.16456	0.743	1.43613	1.05609	0.633	1.26257	0.0534877	0.0487974	Rejected	Rejected
Q9Y508-1	E3 ubiquitin-protein ligase RNF114 [OS=Homo sapiens]	0.977193	0.485	1.59295	1.08303	0.633	1.42726	0.0684606	0.0488274	Rejected	Rejected
Q15404-1	Ras suppressor protein 1 [OS=Homo sapiens]	0.822634	0.078	1.22662	1.09359	0.633	1.51661	0.082291	0.0488575	Rejected	Rejected
Q9BSC4-1	Nucleolar protein 10 [OS=Homo sapiens]	0.544872	0.005	1.4949	1.08747	0.633	1.4968	0.0857186	0.0488876	Rejected	Rejected
Q9Y5U9	immediate early response 3-interacting protein 1 [OS=Homo sapiens]	0.796649	0.229	1.60829	1.10461	0.631	1.56063	0.0766987	0.0489176	Rejected	Rejected
Q8TEW0	Partitioning defective 3 homolog [OS=Homo sapiens]	20.8543	0.785	23.5538	3.01144	0.629	8.27321	0.0502405	0.0489477	Rejected	Rejected
Q9UKM9-1	RNA-binding protein Raly [OS=Homo sapiens]	53.9942	1	4.4124	1.19833	0.628	2.39644	0.00769693	0.0489778	Enriched	Rejected
Q8N4Q0	Prostaglandin reductase 3 [OS=Homo sapiens]	2.36369	0.77	3.29185	1.27393	0.627	2.57182	0.0517438	0.0490078	Rejected	Rejected
Q9NRW1	Ras-related protein Rab-6B [OS=Homo sapiens]	0.353774	0.009	2.0556	1.08974	0.627	1.38526	0.0853277	0.0490379	Rejected	Rejected
Q32MZ4	Leucine-rich repeat flightless-interacting protein 1 [OS=Homo sapiens]	12.3583	1	4.58739	1.38518	0.626	3.88068	0.00829826	0.0490679	Enriched	Rejected
Q9P2B4	CTTNBP2 N-terminal-like protein [OS=Homo sapiens]	1.00105	0.512	1.68485	1.24353	0.626	2.30609	0.0671678	0.049098	Rejected	Rejected
Q13363-1	C-terminal-binding protein 1 [OS=Homo sapiens]	1.73889	0.888	1.89305	2.08657	0.625	2.78534	0.0401383	0.0491281	Rejected	Rejected
P54136-1	arginine--tRNA ligase, cytoplasmic [OS=Homo sapiens]	4.25291	1	2.1162	1.08918	0.624	1.94661	0.00378833	0.0491581	Enriched	Rejected
Q9Y6G5	COMM domain-containing protein 10 [OS=Homo sapiens]	1.05934	0.623	1.36232	1.03768	0.624	1.27818	0.0606434	0.0491882	Rejected	Rejected
P82673-1	28S ribosomal protein S35, mitochondrial [OS=Homo sapiens]	0.767282	0.101	1.3747	1.06221	0.623	1.3655	0.0809982	0.0492183	Rejected	Rejected
Q16851	UTP--glucose-1-phosphate uridylyltransferase [OS=Homo sapiens]	5.16643	0.998	3.32109	1.11747	0.622	7.47292	0.0140409	0.0492483	Enriched	Rejected
Q96A65	Exocyst complex component 4 [OS=Homo sapiens]	0.972173	0.418	1.2641	1.42588	0.622	6.21948	0.0710764	0.0492784	Rejected	Rejected
O00255-1	Menin [OS=Homo sapiens]	1.12947	0.713	1.44159	1.10646	0.621	1.73601	0.0555021	0.0493085	Rejected	Rejected
Q9GZT8-1	NIF3-like protein 1 [OS=Homo sapiens]	0.849519	0.269	1.56103	1.51056	0.621	2.07336	0.0752255	0.0493385	Rejected	Rejected
Q07021	Complement component 1 Q subcomponent-binding protein, mitochondrial [OS=Homo sapiens]	4.0306	0.766	6.8702	1.35185	0.62	3.89225	0.0519242	0.0493686	Rejected	Rejected
Q92900	Regulator of nonsense transcripts 1 [OS=Homo sapiens]	1.312	0.597	3.81187	1.44252	0.62	5.89754	0.0621768	0.0493987	Rejected	Rejected
Q9GZS3	WD repeat-containing protein 61 [OS=Homo sapiens]	0.778895	0.143	1.41471	1.07599	0.62	1.63058	0.0797354	0.0494287	Rejected	Rejected
P55081	microfibrillar-associated protein 1 [OS=Homo sapiens]	0.766726	0.182	1.58659	1.10227	0.619	1.61506	0.0781118	0.0494588	Rejected	Rejected
P32119	Peroxiredoxin-2 [OS=Homo sapiens]	5.73297	1	2.43781	1.10858	0.618	2.37735	0.00814793	0.0494889	Enriched	Rejected
P29558-1	RNA-binding motif, single-stranded-interacting protein 1 [OS=Homo sapiens]	0.851363	0.234	1.55919	1.06683	0.618	1.51518	0.0765183	0.0495189	Rejected	Rejected
Q12797	Aspartyl/Asparaginyl beta-hydroxylase [OS=Homo sapiens]	0.348982	0.001	1.83064	1.08047	0.618	1.35696	0.0862598	0.049549	Rejected	Rejected
P00505	Aspartate aminotransferase, mitochondrial [OS=Homo sapiens]	8.25	1	2.30366	2.48438	0.617	4.50478	0.00360794	0.0495791	Enriched	Rejected
P31751	RAC-beta serine/threonine-protein kinase [OS=Homo sapiens]	0.801951	0.145	1.36432	1.05595	0.617	1.39327	0.079555	0.0496091	Rejected	Rejected
Q15517	corneodesmosin [OS=Homo sapiens]	6.20725	1	2.4156	1.07111	0.616	1.59798	0.0117258	0.0496392	Enriched	Rejected
P24534	Elongation factor 1-beta [OS=Homo sapiens]	1.62141	0.721	2.52919	1.20082	0.614	3.08478	0.0548406	0.0496693	Rejected	Rejected
Q15382	GTP-binding protein rheb [OS=Homo sapiens]	0.622511	0.311	1.87715	1.24967	0.613	2.89158	0.0738124	0.0496993	Rejected	Rejected
O75534-4	Isoform 4 of Cold shock domain-containing protein E1 [OS=Homo sapiens]	4.4469	0.962	4.02925	1.15761	0.612	3.50523	0.029104	0.0497294	Rejected	Rejected
P31939	bifunctional purine biosynthesis protein purH [OS=Homo sapiens]	1.72207	0.797	2.53296	1.91998	0.612	2.86624	0.0490379	0.0497595	Rejected	Rejected
Q9Y2W1	Thyroid hormone receptor-associated protein 3 [OS=Homo sapiens]	9.67466	0.843	11.4418	1.25285	0.611	4.29929	0.0446482	0.0497895	Rejected	Rejected
Q9UPN3	Microtubule-actin cross-linking factor 1, isoforms 1/2/3/5 [OS=Homo sapiens]	2.85123	0.994	2.31708	1.18658	0.61	2.61772	0.017709	0.0498196	Enriched	Rejected
P51858	hepatoma-derived growth factor [OS=Homo sapiens]	1.19568	0.58	2.40959	1.83646	0.61	2.72958	0.0631088	0.0498497	Rejected	Rejected
O00232-1	26s proteasome non-atpase regulatory subunit 12 [OS=Homo sapiens]	5.96339	0.992	3.61552	1.68865	0.609	2.54944	0.0195129	0.0498797	Enriched	Rejected
Q14738-1	Serine/threonine-protein phosphatase 2A 56 kDa regulatory subunit delta isoform [OS=Homo sapiens]	2.1463	0.971	2.03182	6.68646	0.609	8.56534	0.0273001	0.0499098	Rejected	Rejected
Q9Y4W2	Ribosomal biogenesis protein LAS1L [OS=Homo sapiens]	1.8199	0.965	1.72343	1.10358	0.609	1.46318	0.0287132	0.0499399	Rejected	Rejected
Q15418-2	Isoform 2 of Ribosomal protein S6 kinase alpha-1 [OS=Homo sapiens]	1.65195	0.874	1.96267	1.42052	0.609	2.92765	0.0416115	0.0499699	Rejected	Rejected
Q9HCN4-5	Isoform 5 of GPN-loop GTPase 1 [OS=Homo sapiens]	4.51736	0.818	5.94765	1.23959	0.609	2.98924	0.0474744	0.05	Rejected	Rejected
Q969V3	Nicalin [OS=Homo sapiens]	1.41359	0.681	3.75537	1.03262	0.608	1.24275	0.0573361	0.0500301	Rejected	Rejected
P05187	alkaline phosphatase, placental type [OS=Homo sapiens]	2.27812	0.964	2.18683	2.79465	0.606	4.5236	0.0289537	0.0500601	Rejected	Rejected
Q9C0B1-1	alpha-ketoglutarate-dependent dioxygenase FTO [OS=Homo sapiens]	7.21696	0.993	3.45441	1.68228	0.605	12.2676	0.0189717	0.0500902	Enriched	Rejected
Q99747	Gamma-soluble NSF attachment protein [OS=Homo sapiens]	1.35669	0.931	1.39793	1.04598	0.605	1.36527	0.0340349	0.0501203	Rejected	Rejected
Q9P2M7-1	cingulin [OS=Homo sapiens]	0.930453	0.349	1.4598	1.13853	0.605	3.07043	0.0728803	0.0501503	Rejected	Rejected
Q9GZT4	serine racemase [OS=Homo sapiens]	0.93496	0.359	1.33917	1.0611	0.603	1.50956	0.0726398	0.0501804	Rejected	Rejected
Q8NCN5	Pyruvate dehydrogenase phosphatase regulatory subunit, mitochondrial [OS=Homo sapiens]	3.7715	0.98	3.25163	1.48568	0.602	3.46123	0.0243235	0.0502105	Enriched	Rejected
Q14739	Lamin-B receptor [OS=Homo sapiens]	24.8572	0.971	21.4576	4.00383	0.602	6.26635	0.02727	0.0502405	Rejected	Rejected
Q13510-2	Isoform 2 of Acid ceramidase [OS=Homo sapiens]	5.67421	1	2.54607	1.12104	0.601	1.71051	0.0122069	0.0502706	Enriched	Rejected
Q9Y277	Voltage-dependent anion-selective channel protein 3 [OS=Homo sapiens]	3.83968	0.856	4.61055	3.07278	0.601	15.492	0.0432952	0.0503007	Rejected	Rejected
Q6NW34	Nucleolus and neural progenitor protein [OS=Homo sapiens]	0.852101	0.229	1.41283	1.03385	0.601	1.42599	0.0766687	0.0503307	Rejected	Rejected
Q6NUK1	Calcium-binding mitochondrial carrier protein SCaMC-1 [OS=Homo sapiens]	1.08372	0.655	1.42014	1.09425	0.6	3.84734	0.058629	0.0503608	Rejected	Rejected
P42765	3-ketoacyl-CoA thiolase, mitochondrial [OS=Homo sapiens]	1.02393	0.535	1.57738	1.35631	0.6	1.92513	0.0656645	0.0503909	Rejected	Rejected
Q9H3U1	Protein unc-45 homolog A [OS=Homo sapiens]	0.806574	0.157	1.40954	1.05292	0.6	1.42819	0.0791642	0.0504209	Rejected	Rejected
Q96BR5	Cytochrome c oxidase assembly factor 7 [OS=Homo sapiens]	0.683492	0.096	1.61658	1.94404	0.6	2.93674	0.0813891	0.050451	Rejected	Rejected
O43237	Cytoplasmic dynein 1 light intermediate chain 2 [OS=Homo sapiens]	1.00744	0.508	1.54469	5.97539	0.599	7.4231	0.0674985	0.0504811	Rejected	Rejected
P50748	Kinetochore-associated protein 1 [OS=Homo sapiens]	0.829261	0.141	1.34232	1.03649	0.599	1.34898	0.0797956	0.0505111	Rejected	Rejected
P55809	Succinyl-CoA:3-ketoacid coenzyme A transferase 1, mitochondrial [OS=Homo sapiens]	1.9334	0.983	1.71529	1.41284	0.598	5.26549	0.0233013	0.0505412	Enriched	Rejected
O00443	phosphatidylinositol 4-phosphate 3-kinase C2 domain-containing subunit alpha [OS=Homo sapiens]	7.2557	0.974	6.89647	1.04599	0.598	3.04799	0.0262177	0.0505713	Rejected	Rejected
P35813-3	Isoform 3 of Protein phosphatase 1A [OS=Homo sapiens]	8.44794	0.992	4.08175	1.22028	0.597	2.4672	0.0198737	0.0506013	Enriched	Rejected
P62314	Small nuclear ribonucleoprotein Sm D1 [OS=Homo sapiens]	6.08012	0.91	6.52633	3.21277	0.597	4.42379	0.0374624	0.0506314	Rejected	Rejected
Q3LXA3	Triokinase/FMN cyclase [OS=Homo sapiens]	0.592115	0.033	1.62498	1.86937	0.596	2.60093	0.0838545	0.0506615	Rejected	Rejected
Q15006	ER membrane protein complex subunit 2 [OS=Homo sapiens]	1.61173	0.788	2.03784	1.10771	0.594	1.66861	0.0499699	0.0506915	Rejected	Rejected
O15372	Eukaryotic translation initiation factor 3 subunit H [OS=Homo sapiens]	1.92621	0.939	1.94338	1.15625	0.593	2.54677	0.0328322	0.0507216	Rejected	Rejected
O75179-1	Ankyrin repeat domain-containing protein 17 [OS=Homo sapiens]	2.70835	0.77	6.05646	1.16958	0.593	2.42336	0.0516536	0.0507517	Rejected	Rejected
P60510	Serine/threonine-protein phosphatase 4 catalytic subunit [OS=Homo sapiens]	0.907681	0.387	1.6023	1.20583	0.593	3.83936	0.0717078	0.0507817	Rejected	Rejected
Q9NYB0	Telomeric repeat-binding factor 2-interacting protein 1 [OS=Homo sapiens]	0.853272	0.26	1.51625	1.04274	0.593	1.36817	0.075466	0.0508118	Rejected	Rejected
P23527	Histone H2B type 1-O [OS=Homo sapiens]	1.37588	0.733	2.33898	1.14274	0.592	7.82902	0.0540289	0.0508419	Rejected	Rejected
Q99816	tumor susceptibility gene 101 protein [OS=Homo sapiens]	1.12749	0.722	1.37636	1.08262	0.592	1.76519	0.0547505	0.0508719	Rejected	Rejected
P02763	Alpha-1-acid glycoprotein 1 [OS=Homo sapiens]	0.794916	0.162	1.53428	22.4954	0.591	28.9991	0.0788635	0.050902	Rejected	Rejected
P28482	mitogen-activated protein kinase 1 [OS=Homo sapiens]	0.926616	0.48	4.49708	1.50621	0.59	7.66064	0.0686711	0.0509321	Rejected	Rejected
Q7L2E3-2	Isoform 2 of Putative ATP-dependent RNA helicase DHX30 [OS=Homo sapiens]	1.15762	0.69	1.66487	1.53173	0.589	4.16631	0.0567949	0.0509621	Rejected	Rejected
Q2TAL8	Glutamine-rich protein 1 [OS=Homo sapiens]	1.11765	0.664	1.46266	1.04784	0.589	1.30768	0.0580878	0.0509922	Rejected	Rejected
P48059-3	Isoform 3 of LIM and senescent cell antigen-like-containing domain protein 1 [OS=Homo sapiens]	0.749757	0.118	1.47814	1.06607	0.589	1.48224	0.080457	0.0510222	Rejected	Rejected
O95232-1	Luc7-like protein 3 [OS=Homo sapiens]	6.92857	0.993	3.30463	1.17999	0.588	2.06719	0.0189417	0.0510523	Enriched	Rejected
Q9HAB8-1	phosphopantothenate--cysteine ligase [OS=Homo sapiens]	0.632066	0.026	1.49198	1.32193	0.588	2.1474	0.0844859	0.0510824	Rejected	Rejected
P47813	Eukaryotic translation initiation factor 1A, X-chromosomal [OS=Homo sapiens]	6.08887	1	2.98039	1.14764	0.586	3.00841	0.00886951	0.0511124	Enriched	Rejected
O15031	Plexin-B2 [OS=Homo sapiens]	1.92398	0.965	1.87866	1.09767	0.586	2.21649	0.028653	0.0511425	Rejected	Rejected
Q92817	Envoplakin [OS=Homo sapiens]	4.28667	0.845	5.22125	1.0336	0.586	4.61973	0.0444979	0.0511726	Rejected	Rejected
P40938	replication factor C subunit 3 [OS=Homo sapiens]	0.645408	0.028	1.51017	1.21321	0.586	1.68815	0.0842453	0.0512026	Rejected	Rejected
O75175	CCR4-NOT transcription complex subunit 3 [OS=Homo sapiens]	1.27895	0.843	1.45098	1.24821	0.585	1.87832	0.0448587	0.0512327	Rejected	Rejected
P35237	serpin B6 [OS=Homo sapiens]	4.90629	0.982	3.99312	1.18486	0.584	2.74936	0.0237523	0.0512628	Enriched	Rejected
O96007	molybdopterin synthase catalytic subunit [OS=Homo sapiens]	0.599354	0.031	1.51341	1.06808	0.584	1.48743	0.0839747	0.0512928	Rejected	Rejected
Q92665	28S ribosomal protein S31, mitochondrial [OS=Homo sapiens]	1.33042	0.898	1.50791	1.42314	0.583	22.1406	0.0392363	0.0513229	Rejected	Rejected
P30043	flavin reductase (NADPH) [OS=Homo sapiens]	0.487391	0.124	2.91083	1.16314	0.583	6.67713	0.0802165	0.051353	Rejected	Rejected
Q9C0C2	182 kDa tankyrase-1-binding protein [OS=Homo sapiens]	6.6591	0.993	4.52053	1.51992	0.582	3.24267	0.0188815	0.051383	Enriched	Rejected
Q7Z2W9	39S ribosomal protein L21, mitochondrial [OS=Homo sapiens]	1.07019	0.647	1.35829	1.04042	0.582	1.36055	0.0592002	0.0514131	Rejected	Rejected
Q8WVM8	Sec1 family domain-containing protein 1 [OS=Homo sapiens]	5.48016	0.992	3.78968	2.13346	0.581	4.62561	0.0197535	0.0514432	Enriched	Rejected
Q14119	Vascular endothelial zinc finger 1 [OS=Homo sapiens]	2.6216	0.951	2.6216	1.04238	0.581	1.30424	0.0309982	0.0514732	Rejected	Rejected
Q14657	EKC/KEOPS complex subunit LAGE3 [OS=Homo sapiens]	0.59818	0.02	1.47442	1.02971	0.581	1.37411	0.0847865	0.0515033	Rejected	Rejected
O60264	SWI/SNF-related matrix-associated actin-dependent regulator of chromatin subfamily A member 5 [OS=Homo sapiens]	4.26767	1	2.38065	1.39703	0.58	7.97125	0.00517138	0.0515334	Enriched	Rejected
Q6KC79	Nipped-B-like protein [OS=Homo sapiens]	0.936736	0.418	1.44246	1.04952	0.58	1.59025	0.0711064	0.0515634	Rejected	Rejected
Q15417	Calponin-3 [OS=Homo sapiens]	0.665849	0.241	2.9682	1.20897	0.579	3.35452	0.0763079	0.0515935	Rejected	Rejected
Q9BW27	nuclear pore complex protein Nup85 [OS=Homo sapiens]	3.7246	0.997	2.61184	1.20189	0.578	2.80992	0.0152736	0.0516236	Enriched	Rejected
Q6UB35-1	Monofunctional C1-tetrahydrofolate synthase, mitochondrial [OS=Homo sapiens]	1.58601	0.804	2.19985	1.17658	0.578	4.60672	0.0484366	0.0516536	Rejected	Rejected
P31943	Heterogeneous nuclear ribonucleoprotein H [OS=Homo sapiens]	1.09835	0.55	3.21907	3.49545	0.577	24.2729	0.0647625	0.0516837	Rejected	Rejected
Q96KB5-2	Isoform 2 of Lymphokine-activated killer T-cell-originated protein kinase [OS=Homo sapiens]	4.44216	0.965	2.2478	1.05426	0.576	4.02815	0.0286831	0.0517138	Rejected	Rejected
Q9NVA2-2	Isoform 2 of Septin-11 [OS=Homo sapiens]	3.3835	0.907	4.72292	1.13027	0.576	2.53335	0.0380036	0.0517438	Rejected	Rejected
P46934-4	Isoform 4 of E3 ubiquitin-protein ligase NEDD4 [OS=Homo sapiens]	8.72261	0.871	9.96218	1.05716	0.576	1.33609	0.0418821	0.0517739	Rejected	Rejected
Q86VS8	Protein Hook homolog 3 [OS=Homo sapiens]	2.34606	0.76	2.91783	1.06975	0.576	3.03182	0.0523151	0.051804	Rejected	Rejected
P30405	Peptidyl-prolyl cis-trans isomerase F, mitochondrial [OS=Homo sapiens]	1.42792	0.718	2.90811	4.37775	0.575	8.22477	0.0552315	0.051834	Rejected	Rejected
Q14118	Dystroglycan [OS=Homo sapiens]	1.05286	0.614	1.2925	2.54924	0.575	3.89824	0.0611245	0.0518641	Rejected	Rejected
P06702	Protein S100-A9 [OS=Homo sapiens]	2.02787	0.988	1.79956	1.87783	0.574	5.20923	0.0216777	0.0518942	Enriched	Rejected
P22059	Oxysterol-binding protein 1 [OS=Homo sapiens]	1.4896	0.86	1.69936	1.02602	0.574	1.31984	0.0429345	0.0519242	Rejected	Rejected
Q01105-2	Isoform 2 of Protein SET [OS=Homo sapiens]	1.20103	0.682	1.75728	1.05469	0.574	1.44954	0.057276	0.0519543	Rejected	Rejected
Q14194-2	Isoform LCRMP-1 of Dihydropyrimidinase-related protein 1 [OS=Homo sapiens]	3.98741	0.833	4.69449	1.0461	0.573	1.42244	0.0454901	0.0519844	Rejected	Rejected
P68431	Histone H3.1 [OS=Homo sapiens]	2.59375	0.716	3.20794	4.19726	0.573	7.31109	0.0553818	0.0520144	Rejected	Rejected
P28062-1	Proteasome subunit beta type-8 [OS=Homo sapiens]	0.991699	0.479	1.34286	1.05861	0.573	2.30627	0.0687312	0.0520445	Rejected	Rejected
P63010-2	Isoform 2 of AP-2 complex subunit beta [OS=Homo sapiens]	3.79467	1	2.04044	1.06391	0.572	1.99413	0.00375827	0.0520746	Enriched	Rejected
P19404	NADH dehydrogenase [ubiquinone] flavoprotein 2, mitochondrial [OS=Homo sapiens]	1.50043	0.765	1.76324	1.0399	0.572	1.6802	0.0521347	0.0521046	Rejected	Rejected
Q05639	Elongation factor 1-alpha 2 [OS=Homo sapiens]	0.209082	0.004	2.56017	3.53038	0.572	5.14646	0.0857486	0.0521347	Rejected	Rejected
Q9Y6A4	Cilia- and flagella-associated protein 20 [OS=Homo sapiens]	3.02246	0.765	4.59095	1.52618	0.571	2.9141	0.0521648	0.0521648	Rejected	Rejected
Q9UBW8	COP9 signalosome complex subunit 7a [OS=Homo sapiens]	17.1085	0.998	13.3825	1.02556	0.57	1.25699	0.0143416	0.0521948	Enriched	Rejected
Q52LW3	Rho GTPase-activating protein 29 [OS=Homo sapiens]	2.44903	0.778	2.84038	1.04207	0.57	1.37954	0.0510523	0.0522249	Rejected	Rejected
Q9BQ69	O-acetyl-ADP-ribose deacetylase MACROD1 [OS=Homo sapiens]	7.97974	0.928	8.9308	1.0412	0.569	1.43289	0.034546	0.052255	Rejected	Rejected
P23588	eukaryotic translation initiation factor 4B [OS=Homo sapiens]	1.32232	0.854	1.49217	1.06402	0.569	2.1063	0.0435358	0.052285	Rejected	Rejected
Q9H2M9	Rab3 GTPase-activating protein non-catalytic subunit [OS=Homo sapiens]	0.841155	0.31	1.62994	1.05223	0.569	1.48556	0.0738425	0.0523151	Rejected	Rejected
P49753-1	Acyl-coenzyme A thioesterase 2, mitochondrial [OS=Homo sapiens]	6.71078	0.999	3.52825	1.14149	0.568	1.90874	0.0128683	0.0523452	Enriched	Rejected
O15067	Phosphoribosylformylglycinamidine synthase [OS=Homo sapiens]	3.2217	0.973	3.10366	1.07946	0.568	3.30078	0.0263379	0.0523752	Rejected	Rejected
Q7Z417	Nuclear fragile X mental retardation-interacting protein 2 [OS=Homo sapiens]	1.02994	0.582	1.2797	1.03614	0.568	1.36466	0.0629886	0.0524053	Rejected	Rejected
Q14141-1	Septin-6 [OS=Homo sapiens]	0.735609	0.085	1.48615	1.05145	0.568	1.49394	0.08184	0.0524354	Rejected	Rejected
Q9ULX3	RNA-binding protein NOB1 [OS=Homo sapiens]	1.00788	0.54	1.49802	1.02556	0.567	1.24407	0.0654841	0.0524654	Rejected	Rejected
Q9BUF5	Tubulin beta-6 chain [OS=Homo sapiens]	2.19419	0.955	2.17548	1.1394	0.566	3.8231	0.0301263	0.0524955	Rejected	Rejected
Q96FQ6	Protein S100-A16 [OS=Homo sapiens]	3.62202	0.992	2.28612	1.10263	0.565	5.14827	0.0198437	0.0525256	Enriched	Rejected
O43264	Centromere/kinetochore protein zw10 homolog [OS=Homo sapiens]	2.09469	0.891	2.20877	1.21612	0.565	3.09426	0.0396572	0.0525556	Rejected	Rejected
Q8NE86	Calcium uniporter protein, mitochondrial [OS=Homo sapiens]	2.69745	0.664	3.38001	1.07969	0.565	4.65797	0.0581179	0.0525857	Rejected	Rejected
Q9Y320	Thioredoxin-related transmembrane protein 2 [OS=Homo sapiens]	1.19481	0.532	2.12345	1.20816	0.565	2.06001	0.0658749	0.0526158	Rejected	Rejected
Q9NS86	lanC-like protein 2 [OS=Homo sapiens]	0.883176	0.258	1.32111	1.0382	0.565	1.37732	0.0756164	0.0526458	Rejected	Rejected
Q9BTW9-4	Isoform 4 of Tubulin-specific chaperone D [OS=Homo sapiens]	3.52504	0.94	3.61747	1.0109	0.563	1.13095	0.0327721	0.0526759	Rejected	Rejected
Q8IWV7-1	E3 ubiquitin-protein ligase UBR1 [OS=Homo sapiens]	1.28097	0.826	1.50674	1.02773	0.563	1.32894	0.0463921	0.052706	Rejected	Rejected
Q9Y2L1-1	exosome complex exonuclease RRP44 [OS=Homo sapiens]	2.88786	0.945	2.92441	1.10968	0.561	2.45757	0.0321407	0.052736	Rejected	Rejected
Q9BRX5	DNA replication complex GINS protein PSF3 [OS=Homo sapiens]	1.01509	0.547	1.35665	1.02979	0.561	1.71702	0.0650331	0.0527661	Rejected	Rejected
P46063	ATP-dependent DNA helicase Q1 [OS=Homo sapiens]	1.4932	0.693	3.14783	1.16426	0.559	2.19734	0.0564041	0.0527962	Rejected	Rejected
O14974	Protein phosphatase 1 regulatory subunit 12A [OS=Homo sapiens]	1.14048	0.649	1.69896	2.28959	0.558	4.91989	0.0588695	0.0528262	Rejected	Rejected
Q5F1R6-2	Isoform 2 of DnaJ homolog subfamily C member 21 [OS=Homo sapiens]	1.0122	0.527	1.40832	1.03864	0.558	1.43613	0.0662959	0.0528563	Rejected	Rejected
P84095	Rho-related GTP-binding protein RhoG [OS=Homo sapiens]	0.687668	0.105	1.55842	1.42511	0.558	5.77341	0.0808779	0.0528863	Rejected	Rejected
Q8NB90-1	Spermatogenesis-associated protein 5 [OS=Homo sapiens]	1.24057	0.647	1.83409	3.99996	0.557	6.93678	0.0591702	0.0529164	Rejected	Rejected
P00813	adenosine deaminase [OS=Homo sapiens]	1.09701	0.612	1.57477	3.09095	0.557	9.31859	0.0612748	0.0529465	Rejected	Rejected
Q13325	Interferon-induced protein with tetratricopeptide repeats 5 [OS=Homo sapiens]	1.02088	0.551	1.27118	1.04267	0.557	2.26008	0.0647023	0.0529765	Rejected	Rejected
Q9C0H2-4	Isoform 4 of Protein tweety homolog 3 [OS=Homo sapiens]	9.40304	1	2.40917	3.95772	0.556	5.50715	0.0116055	0.0530066	Enriched	Rejected
Q8TDY2-1	RB1-inducible coiled-coil protein 1 [OS=Homo sapiens]	2.14158	0.999	1.76643	2.22413	0.556	4.46557	0.0133794	0.0530367	Enriched	Rejected
Q9P2T1-2	Isoform 2 of GMP reductase 2 [OS=Homo sapiens]	0.851786	0.108	1.25654	1.03576	0.556	1.412	0.0807877	0.0530667	Rejected	Rejected
P14780	Matrix metalloproteinase-9 [OS=Homo sapiens]	0.9229	0.364	1.55192	1.01113	0.555	7.41859	0.0724895	0.0530968	Rejected	Rejected
Q9UBD5-2	Isoform 2 of Origin recognition complex subunit 3 [OS=Homo sapiens]	1.0743	0.681	1.33754	9.18508	0.554	12.2475	0.0573662	0.0531269	Rejected	Rejected
O95168-1	NADH dehydrogenase [ubiquinone] 1 beta subcomplex subunit 4 [OS=Homo sapiens]	0.926596	0.302	1.34494	1.03711	0.554	1.45531	0.074083	0.0531569	Rejected	Rejected
P08243-1	Asparagine synthetase [glutamine-hydrolyzing] [OS=Homo sapiens]	5.84794	1	3.51373	1.23816	0.553	3.53102	0.00649429	0.053187	Enriched	Rejected
O14617-5	Isoform 5 of AP-3 complex subunit delta-1 [OS=Homo sapiens]	2.01982	0.888	2.288	1.03232	0.553	1.36505	0.0401684	0.0532171	Rejected	Rejected
Q9UBE0-1	SUMO-activating enzyme subunit 1 [OS=Homo sapiens]	1.16779	0.784	1.40251	1.03549	0.553	3.26744	0.0502706	0.0532471	Rejected	Rejected
Q13492-1	Phosphatidylinositol-binding clathrin assembly protein [OS=Homo sapiens]	6.18887	0.91	7.63968	1.34566	0.552	3.66346	0.0374925	0.0532772	Rejected	Rejected
Q9Y237-2	Isoform 2 of Peptidyl-prolyl cis-trans isomerase NIMA-interacting 4 [OS=Homo sapiens]	1.02659	0.51	1.75423	1.11624	0.552	1.70912	0.0673482	0.0533073	Rejected	Rejected
Q9UI12-1	V-type proton ATPase subunit H [OS=Homo sapiens]	8.00189	0.993	5.65775	1.03921	0.551	1.88379	0.0191221	0.0533373	Enriched	Rejected
P28066-1	Proteasome subunit alpha type-5 [OS=Homo sapiens]	3.01362	0.988	2.25423	1.07368	0.551	3.58678	0.0215875	0.0533674	Enriched	Rejected
Q969G6	Riboflavin kinase [OS=Homo sapiens]	0.959592	0.413	1.3255	1.02284	0.551	1.32914	0.0711666	0.0533975	Rejected	Rejected
P25789	Proteasome subunit alpha type-4 [OS=Homo sapiens]	7.67319	1	2.42363	1.51985	0.55	3.08417	0.00643416	0.0534275	Enriched	Rejected
Q13952-1	Nuclear transcription factor Y subunit gamma [OS=Homo sapiens]	1.81756	0.714	2.1346	1.01721	0.55	1.38342	0.055472	0.0534576	Rejected	Rejected
P36542-1	ATP synthase subunit gamma, mitochondrial [OS=Homo sapiens]	1.13379	0.654	1.53519	21.4042	0.55	30.5069	0.0586891	0.0534877	Rejected	Rejected
Q9BT22	chitobiosyldiphosphodolichol beta-mannosyltransferase [OS=Homo sapiens]	0.847083	0.143	1.25466	1.04803	0.55	1.65381	0.0796753	0.0535177	Rejected	Rejected
Q9Y4G6	Talin-2 [OS=Homo sapiens]	0.645871	0.119	1.76249	2.1422	0.55	4.91225	0.0803668	0.0535478	Rejected	Rejected
P01764	Immunoglobulin heavy variable 3-23 [OS=Homo sapiens]	2.99997	0.496	6.67927	1.07116	0.549	32.2566	0.0679495	0.0535779	Rejected	Rejected
Q99798	Aconitate hydratase, mitochondrial [OS=Homo sapiens]	0.871493	0.326	1.7891	1.05405	0.549	2.05016	0.0733313	0.0536079	Rejected	Rejected
O43681	ATPase ASNA1 [OS=Homo sapiens]	0.789442	0.185	1.39699	1.01628	0.549	1.72183	0.0780216	0.053638	Rejected	Rejected
P06454-1	Prothymosin alpha [OS=Homo sapiens]	3.65618	0.995	2.96261	1.04122	0.548	2.55276	0.016837	0.0536681	Enriched	Rejected
P21283	V-type proton ATPase subunit C 1 [OS=Homo sapiens]	36.5686	0.789	41.669	2.23844	0.548	9.2115	0.0498797	0.0536981	Rejected	Rejected
O60831	PRA1 family protein 2 [OS=Homo sapiens]	1.45358	0.589	2.02357	1.04987	0.548	1.98893	0.0625376	0.0537282	Rejected	Rejected
Q12768	WASH complex subunit 5 [OS=Homo sapiens]	0.978498	0.475	1.45036	5.36842	0.548	7.4046	0.0688815	0.0537583	Rejected	Rejected
Q9UBQ5	Eukaryotic translation initiation factor 3 subunit K [OS=Homo sapiens]	0.448743	0.32	6.11928	2.17529	0.547	9.9462	0.0735719	0.0537883	Rejected	Rejected
Q15554-3	Telomeric repeat-binding factor 2 [OS=Homo sapiens]	0.940335	0.374	1.41654	1.03191	0.546	1.71896	0.0721287	0.0538184	Rejected	Rejected
Q9NRG0	Chromatin accessibility complex protein 1 [OS=Homo sapiens]	0.911442	0.302	1.34539	1.04865	0.546	1.72858	0.074113	0.0538485	Rejected	Rejected
Q96AQ6	Pre-B-cell leukemia transcription factor-interacting protein 1 [OS=Homo sapiens]	19.4445	0.983	11.7992	1.01537	0.545	1.16283	0.0234215	0.0538785	Enriched	Rejected
Q7Z5K2-3	Isoform 3 of Wings apart-like protein homolog [OS=Homo sapiens]	1.16377	0.764	1.383	1.04465	0.545	1.46972	0.0522249	0.0539086	Rejected	Rejected
O60934	Nibrin [OS=Homo sapiens]	0.557394	0.01	1.47032	1.00848	0.545	1.33849	0.0852676	0.0539387	Rejected	Rejected
Q13242	serine/arginine-rich splicing factor 9 [OS=Homo sapiens]	17.5026	1	7.41871	2.04778	0.544	4.36243	0.00904991	0.0539687	Enriched	Rejected
P52788-1	Spermine synthase [OS=Homo sapiens]	11.9105	0.908	12.7681	2.70288	0.544	7.30777	0.0378533	0.0539988	Rejected	Rejected
Q06203	amidophosphoribosyltransferase [OS=Homo sapiens]	1.85946	0.887	2.01349	1.01411	0.544	1.91776	0.0403788	0.0540289	Rejected	Rejected
P55209	Nucleosome assembly protein 1-like 1 [OS=Homo sapiens]	2.26947	0.526	3.62454	1.05324	0.544	2.67562	0.0663259	0.0540589	Rejected	Rejected
P33121	Long-chain-fatty-acid--CoA ligase 1 [OS=Homo sapiens]	0.791368	0.19	1.50698	2.89344	0.543	3.67644	0.0779014	0.054089	Rejected	Rejected
Q9UKX7	Nuclear pore complex protein Nup50 [OS=Homo sapiens]	7.98777	0.923	8.47775	1.12019	0.542	8.48847	0.0356885	0.0541191	Rejected	Rejected
P42330	Aldo-keto reductase family 1 member C3 [OS=Homo sapiens]	1.54299	0.57	2.35952	2.59416	0.542	16.5915	0.06362	0.0541491	Rejected	Rejected
Q96SU4-6	Isoform 6 of Oxysterol-binding protein-related protein 9 [OS=Homo sapiens]	5.12682	0.974	4.92176	1.09442	0.54	1.95539	0.0261275	0.0541792	Rejected	Rejected
Q96DI7-2	Isoform 2 of U5 small nuclear ribonucleoprotein 40 kDa protein [OS=Homo sapiens]	0.372951	0.003	2.27079	1.02687	0.54	1.39876	0.0859892	0.0542093	Rejected	Rejected
P0DOY2	immunoglobulin lambda constant 2 [OS=Homo sapiens]	3.02018	0.948	3.02252	0.668506	0.538	17.4791	0.0315995	0.0542393	Rejected	Rejected
O00148	ATP-dependent RNA helicase DDX39A [OS=Homo sapiens]	1.92439	0.793	2.35391	1.84352	0.538	3.16825	0.0493085	0.0542694	Rejected	Rejected
Q13155	aminoacyl tRNA synthase complex-interacting multifunctional protein 2 [OS=Homo sapiens]	3.45464	0.793	7.44885	2.2894	0.538	5.17432	0.0493987	0.0542995	Rejected	Rejected
Q7L5N1	COP9 signalosome complex subunit 6 [OS=Homo sapiens]	1.15914	0.783	1.39749	1.02574	0.538	1.45098	0.0504209	0.0543295	Rejected	Rejected
Q9HCC0-1	Methylcrotonoyl-CoA carboxylase beta chain, mitochondrial [OS=Homo sapiens]	1.05814	0.702	1.17935	1.01122	0.538	1.45167	0.0561335	0.0543596	Rejected	Rejected
Q7L5D6	Golgi to ER traffic protein 4 homolog [OS=Homo sapiens]	1.05005	0.637	1.24497	1.01703	0.538	1.68459	0.0597715	0.0543897	Rejected	Rejected
P31942	Heterogeneous nuclear ribonucleoprotein H3 [OS=Homo sapiens]	20.4571	1	3.60034	1.01011	0.537	2.37264	0.00667468	0.0544197	Enriched	Rejected
Q8IX12	Cell division cycle and apoptosis regulator protein 1 [OS=Homo sapiens]	3.12914	0.996	2.29034	1.18593	0.537	2.6731	0.0161455	0.0544498	Enriched	Rejected
P33991	DNA replication licensing factor MCM4 [OS=Homo sapiens]	2.2557	0.859	2.85425	1.00813	0.537	1.94272	0.0429946	0.0544799	Rejected	Rejected
P24539	ATP synthase F(0) complex subunit B1, mitochondrial [OS=Homo sapiens]	0.75059	0.185	1.6266	1.13616	0.537	5.44473	0.0779916	0.0545099	Rejected	Rejected
Q9BVJ6-1	U3 small nucleolar RNA-associated protein 14 homolog A [OS=Homo sapiens]	1.0611	0.614	1.33618	1.04004	0.536	1.50607	0.0610944	0.05454	Rejected	Rejected
Q8IYB3	Serine/arginine repetitive matrix protein 1 [OS=Homo sapiens]	0.721003	0.027	1.3085	1.00606	0.536	1.5931	0.0843055	0.0545701	Rejected	Rejected
Q5UIP0	Telomere-associated protein RIF1 [OS=Homo sapiens]	1.27142	0.875	1.40667	1.03041	0.535	1.44255	0.0415514	0.0546001	Rejected	Rejected
P13861	cAMP-dependent protein kinase type II-alpha regulatory subunit [OS=Homo sapiens]	3.02218	0.848	4.00251	1.05675	0.535	1.99591	0.0441972	0.0546302	Rejected	Rejected
Q6PJG2	ELM2 and SANT domain-containing protein 1 [OS=Homo sapiens]	3.03821	0.82	4.82999	1.3765	0.535	2.57726	0.0471137	0.0546603	Rejected	Rejected
Q9H6S3-3	Isoform 3 of Epidermal growth factor receptor kinase substrate 8-like protein 2 [OS=Homo sapiens]	0.489634	0	1.74863	1.57568	0.535	2.46083	0.0865905	0.0546903	Rejected	Rejected
P29372	DNA-3-methyladenine glycosylase [OS=Homo sapiens]	1.05578	0.637	1.31118	1.01495	0.534	1.34909	0.0597414	0.0547204	Rejected	Rejected
Q01469	Fatty acid-binding protein, epidermal [OS=Homo sapiens]	20.9906	1	14.9584	1.03168	0.533	2.89826	0.00556224	0.0547505	Enriched	Rejected
P49959-3	Isoform 3 of Double-strand break repair protein MRE11 [OS=Homo sapiens]	2.63453	1	1.96231	1.00774	0.533	1.685	0.00805773	0.0547805	Enriched	Rejected
P49841-2	Isoform 2 of Glycogen synthase kinase-3 beta [OS=Homo sapiens]	0.877024	0.166	1.28173	1.02044	0.533	1.36583	0.078653	0.0548106	Rejected	Rejected
P21127-1	Cyclin-dependent kinase 11B [OS=Homo sapiens]	4.8863	0.924	5.0334	1.02438	0.532	1.29453	0.0355983	0.0548406	Rejected	Rejected
P07947	tyrosine-protein kinase Yes [OS=Homo sapiens]	1.19883	0.777	1.52738	1.02322	0.531	1.34851	0.0510824	0.0548707	Rejected	Rejected
Q14554	Protein disulfide-isomerase A5 [OS=Homo sapiens]	1.03517	0.577	1.41008	1.01775	0.531	1.40206	0.0633494	0.0549008	Rejected	Rejected
Q02218	2-oxoglutarate dehydrogenase, mitochondrial [OS=Homo sapiens]	0.365083	0.022	2.59432	1.40309	0.531	5.05763	0.0845761	0.0549308	Rejected	Rejected
O43464	Serine protease HTRA2, mitochondrial [OS=Homo sapiens]	1.11905	0.742	1.29935	1.01343	0.53	1.28681	0.0535177	0.0549609	Rejected	Rejected
Q9Y5T5-1	ubiquitin carboxyl-terminal hydrolase 16 [OS=Homo sapiens]	1.31182	0.886	1.40757	1.02012	0.529	1.34188	0.0404991	0.054991	Rejected	Rejected
Q86VI3	Ras GTPase-activating-like protein IQGAP3 [OS=Homo sapiens]	4.29244	0.595	6.03495	1.82098	0.529	2.38737	0.0622971	0.055021	Rejected	Rejected
Q9NZZ3	Charged multivesicular body protein 5 [OS=Homo sapiens]	1.25805	0.599	3.63147	1.49555	0.528	5.07742	0.0620565	0.0550511	Rejected	Rejected
P84101-1	Small EDRK-rich factor 2 [OS=Homo sapiens]	1.01725	0.543	1.31188	1.02547	0.528	1.63411	0.0653037	0.0550812	Rejected	Rejected
P25490	Transcriptional repressor protein YY1 [OS=Homo sapiens]	1.33692	0.529	1.93569	1.0754	0.526	2.18014	0.0660253	0.0551112	Rejected	Rejected
Q9UIV1-1	CCR4-NOT transcription complex subunit 7 [OS=Homo sapiens]	0.881084	0.201	1.29178	1.00717	0.526	1.22313	0.0776909	0.0551413	Rejected	Rejected
P48729-1	Casein kinase I isoform alpha [OS=Homo sapiens]	1.19072	0.723	1.60491	3.8376	0.525	4.69812	0.0546603	0.0551714	Rejected	Rejected
Q14566	DNA replication licensing factor MCM6 [OS=Homo sapiens]	9.30049	0.984	7.88846	0.518727	0.523	4.44661	0.0228503	0.0552014	Enriched	Rejected
P62277	40S ribosomal protein S13 [OS=Homo sapiens]	5.52385	0.959	5.33798	1.90855	0.523	6.544	0.0296152	0.0552315	Rejected	Rejected
Q05519	serine/arginine-rich splicing factor 11 [OS=Homo sapiens]	3.65119	0.951	3.61436	1.55254	0.522	4.83693	0.0309681	0.0552616	Rejected	Rejected
P27361-1	mitogen-activated protein kinase 3 [OS=Homo sapiens]	1.62664	0.924	1.75865	1.01356	0.522	1.37921	0.0353879	0.0552916	Rejected	Rejected
P00387-3	Isoform 3 of NADH-cytochrome b5 reductase 3 [OS=Homo sapiens]	1.47643	0.814	1.92046	1.07987	0.522	3.16395	0.0476849	0.0553217	Rejected	Rejected
Q96D46	60S ribosomal export protein NMD3 [OS=Homo sapiens]	1.2191	0.872	1.32524	2.98271	0.521	12.531	0.0418521	0.0553518	Rejected	Rejected
Q16629	serine/arginine-rich splicing factor 7 [OS=Homo sapiens]	9.87074	0.918	11.0511	1.05306	0.52	5.18935	0.0364101	0.0553818	Rejected	Rejected
Q14011	Cold-inducible RNA-binding protein [OS=Homo sapiens]	3.55057	0.509	5.69223	1.15725	0.519	2.73601	0.0674083	0.0554119	Rejected	Rejected
Q00577	Transcriptional activator protein Pur-alpha [OS=Homo sapiens]	0.89306	0.325	1.4026	1.02974	0.519	1.48294	0.0734516	0.055442	Rejected	Rejected
Q8NBQ5	Estradiol 17-beta-dehydrogenase 11 [OS=Homo sapiens]	6.93668	0.995	5.91194	1.08338	0.518	3.77912	0.0171678	0.055472	Enriched	Rejected
O95817	BAG family molecular chaperone regulator 3 [OS=Homo sapiens]	9.48059	0.967	7.6071	1.15865	0.518	2.75715	0.028202	0.0555021	Rejected	Rejected
P07237	Protein disulfide-isomerase [OS=Homo sapiens]	5.58892	0.998	3.22288	1.04777	0.517	2.27201	0.0137102	0.0555322	Enriched	Rejected
Q15061	WD repeat-containing protein 43 [OS=Homo sapiens]	2.23676	0.97	2.11549	1.02118	0.517	1.70557	0.0275707	0.0555622	Rejected	Rejected
P49913	cathelicidin antimicrobial peptide [OS=Homo sapiens]	1.54841	0.919	1.59467	4.59509	0.517	51.1664	0.0362598	0.0555923	Rejected	Rejected
P14555	Phospholipase A2, membrane associated [OS=Homo sapiens]	2.16608	0.903	2.52285	1.11485	0.517	3.82015	0.0386951	0.0556224	Rejected	Rejected
O14964	Hepatocyte growth factor-regulated tyrosine kinase substrate [OS=Homo sapiens]	26.1989	1	4.52548	0.791593	0.516	2.46211	0.00917017	0.0556524	Enriched	Rejected
O00299	chloride intracellular channel protein 1 [OS=Homo sapiens]	4.8068	0.994	3.6943	0.779544	0.515	3.39083	0.0177691	0.0556825	Enriched	Rejected
P49755	Transmembrane emp24 domain-containing protein 10 [OS=Homo sapiens]	15.5313	0.979	7.15145	1.32252	0.515	4.55779	0.024564	0.0557126	Enriched	Rejected
Q07955-1	Serine/arginine-rich splicing factor 1 [OS=Homo sapiens]	3.02443	1	1.89682	0.329787	0.514	6.5101	0.00673482	0.0557426	Enriched	Rejected
Q13951	Core-binding factor subunit beta [OS=Homo sapiens]	5.33319	0.998	2.82313	0.338333	0.514	22.8242	0.0144618	0.0557727	Enriched	Rejected
P26006-1	Isoform 2 of Integrin alpha-3 [OS=Homo sapiens]	6.2474	0.997	3.559	0.97898	0.514	3.65767	0.015003	0.0558028	Enriched	Rejected
P13796	Plastin-2 [OS=Homo sapiens]	1.52196	0.831	2.08381	0.714048	0.513	22.4493	0.0457907	0.0558328	Rejected	Rejected
Q96GD4-5	Isoform 5 of Aurora kinase B [OS=Homo sapiens]	0.177074	0.486	13.4758	16.5025	0.513	31.9242	0.0684305	0.0558629	Rejected	Rejected
Q8TCS8	Polyribonucleotide nucleotidyltransferase 1, mitochondrial [OS=Homo sapiens]	0.947821	0.4	1.474	1.02938	0.513	1.45295	0.071377	0.055893	Rejected	Rejected
P40222	alpha-taxilin [OS=Homo sapiens]	0.27481	0.022	2.72669	1.0055	0.513	1.93295	0.084546	0.055923	Rejected	Rejected
O14579-1	coatomer subunit epsilon [OS=Homo sapiens]	0.391684	0.012	2.18965	1.02089	0.513	1.63345	0.0850271	0.0559531	Rejected	Rejected
P61160-1	Actin-related protein 2 [OS=Homo sapiens]	1.09752	0.567	2.32481	0.848997	0.512	4.04765	0.0637402	0.0559832	Rejected	Rejected
Q86VM9	Zinc finger CCCH domain-containing protein 18 [OS=Homo sapiens]	0.754259	0.42	2.22597	1.497	0.512	1.77869	0.0709862	0.0560132	Rejected	Rejected
P52566	Rho GDP-dissociation inhibitor 2 [OS=Homo sapiens]	11.0512	1	2.99791	1.00792	0.511	30.0062	0.0112748	0.0560433	Enriched	Rejected
O00233-1	26S proteasome non-ATPase regulatory subunit 9 [OS=Homo sapiens]	1.76874	0.987	1.62712	1.00319	0.511	1.69528	0.0221888	0.0560734	Enriched	Rejected
Q8WWM7-3	Isoform 3 of Ataxin-2-like protein [OS=Homo sapiens]	2.43353	0.971	2.30076	0.737645	0.511	5.1518	0.0270896	0.0561034	Rejected	Rejected
Q9H6Z4	Ran-binding protein 3 [OS=Homo sapiens]	2.59378	0.853	3.72523	3.19492	0.511	7.83646	0.0437162	0.0561335	Rejected	Rejected
Q09028	Histone-binding protein RBBP4 [OS=Homo sapiens]	1.95657	0.631	3.4564	0.999192	0.511	2.9753	0.0601924	0.0561636	Rejected	Rejected
P49189	4-trimethylaminobutyraldehyde dehydrogenase [OS=Homo sapiens]	2.31405	0.993	1.82526	1.02618	0.51	2.19006	0.0189116	0.0561936	Enriched	Rejected
Q92922	SWI/SNF complex subunit SMARCC1 [OS=Homo sapiens]	4.59355	0.97	4.28124	2.23124	0.51	7.06416	0.0274805	0.0562237	Rejected	Rejected
P49792	E3 SUMO-protein ligase RanBP2 [OS=Homo sapiens]	2.77674	0.997	1.91876	2.10285	0.509	6.67099	0.0149429	0.0562538	Enriched	Rejected
P18085	ADP-ribosylation factor 4 [OS=Homo sapiens]	8.48054	0.987	3.81003	1.1681	0.509	6.81524	0.0220385	0.0562838	Enriched	Rejected
Q8N543	prolyl 3-hydroxylase OGFOD1 [OS=Homo sapiens]	3.06544	0.999	2.086	0.992422	0.508	1.88094	0.0133494	0.0563139	Enriched	Rejected
P10644	cAMP-dependent protein kinase type I-alpha regulatory subunit [OS=Homo sapiens]	2.20964	0.953	2.18656	9.78368	0.508	14.9686	0.0306374	0.056344	Rejected	Rejected
P40123	Adenylyl cyclase-associated protein 2 [OS=Homo sapiens]	1.09633	0.636	1.57489	1.00644	0.508	1.45044	0.0598016	0.056374	Rejected	Rejected
P49736	DNA replication licensing factor mcm2 [OS=Homo sapiens]	2.45127	0.987	2.06482	0.977791	0.507	2.42729	0.0219483	0.0564041	Enriched	Rejected
P01023	alpha-2-macroglobulin [OS=Homo sapiens]	2.17924	0.923	2.3788	2.04319	0.507	21.2511	0.0356584	0.0564342	Rejected	Rejected
Q8NBF2-1	NHL repeat-containing protein 2 [OS=Homo sapiens]	0.891218	0.259	1.38112	1.00861	0.507	1.3031	0.0755262	0.0564642	Rejected	Rejected
P78527	DNA-dependent protein kinase catalytic subunit [OS=Homo sapiens]	3.05436	1	1.87556	0.839395	0.506	2.24716	0.000180397	0.0564943	Enriched	Rejected
O43707	Alpha-actinin-4 [OS=Homo sapiens]	4.78311	1	2.27673	0.99059	0.506	2.78209	0.000481058	0.0565244	Enriched	Rejected
Q9P2I0	Cleavage and polyadenylation specificity factor subunit 2 [OS=Homo sapiens]	7.19654	0.976	4.24356	1.01258	0.506	1.4295	0.0256164	0.0565544	Enriched	Rejected
Q2NKX8	Dna excision repair protein ercc-6-like [OS=Homo sapiens]	0.808165	0.165	1.42489	1.00177	0.506	1.3453	0.0787432	0.0565845	Rejected	Rejected
Q641Q2	WASH complex subunit 2A [OS=Homo sapiens]	0.519006	0.086	2.07076	0.205467	0.506	6.83152	0.0817498	0.0566146	Rejected	Rejected
Q969G3	SWI/SNF-related matrix-associated actin-dependent regulator of chromatin subfamily E member 1 [OS=Homo sapiens]	1.16579	0.8	1.33725	1.00898	0.505	1.49703	0.0488274	0.0566446	Rejected	Rejected
P21980	Protein-glutamine gamma-glutamyltransferase 2 [OS=Homo sapiens]	7.56723	1	2.33509	0.569273	0.504	4.21772	0.00438966	0.0566747	Enriched	Rejected
O00592	Podocalyxin [OS=Homo sapiens]	2.70714	1	1.8919	0.671708	0.504	4.81565	0.010463	0.0567048	Enriched	Rejected
Q9UIG0	Tyrosine-protein kinase BAZ1B [OS=Homo sapiens]	0.967492	0.459	1.88599	1.01006	0.503	2.06616	0.0696031	0.0567348	Rejected	Rejected
O95202-1	mitochondrial proton/calcium exchanger protein [OS=Homo sapiens]	1.25023	0.851	1.41182	1.00865	0.502	1.31016	0.0439266	0.0567649	Rejected	Rejected
Q96KR1	Zinc finger RNA-binding protein [OS=Homo sapiens]	2.48101	0.753	3.89943	0.690922	0.502	3.21613	0.0528262	0.0567949	Rejected	Rejected
P32322-3	Isoform 3 of Pyrroline-5-carboxylate reductase 1, mitochondrial [OS=Homo sapiens]	4.69037	0.959	4.43745	0.993705	0.501	3.03352	0.0295851	0.056825	Rejected	Rejected
Q9GZR7	ATP-dependent RNA helicase DDX24 [OS=Homo sapiens]	1.05288	0.629	1.33586	1.01514	0.501	1.30079	0.0604029	0.0568551	Rejected	Rejected
P20042	Eukaryotic translation initiation factor 2 subunit 2 [OS=Homo sapiens]	10.1719	1	3.02689	0.992057	0.499	2.15882	0.00703548	0.0568851	Enriched	Rejected
Q9UBS4	DnaJ homolog subfamily B member 11 [OS=Homo sapiens]	0.770335	0.313	2.80739	1.11059	0.499	3.26533	0.0737523	0.0569152	Rejected	Rejected
Q6L8Q7-1	2',5'-phosphodiesterase 12 [OS=Homo sapiens]	0.827768	0.285	1.58529	1.05214	0.499	2.81598	0.0747444	0.0569453	Rejected	Rejected
Q9UM07	Protein-arginine deiminase type-4 [OS=Homo sapiens]	0.803471	0.199	1.59815	0.840498	0.499	15.3666	0.0777511	0.0569753	Rejected	Rejected
Q9BV20-1	methylthioribose-1-phosphate isomerase [OS=Homo sapiens]	1.70013	0.909	1.84297	0.995579	0.498	1.45835	0.0377029	0.0570054	Rejected	Rejected
O60678	protein arginine N-methyltransferase 3 [OS=Homo sapiens]	0.599662	0.055	1.58555	0.997	0.498	1.45005	0.0830427	0.0570355	Rejected	Rejected
P22695	Cytochrome b-c1 complex subunit 2, mitochondrial [OS=Homo sapiens]	3.53638	0.992	2.45574	1.01206	0.497	2.73101	0.0194829	0.0570655	Enriched	Rejected
Q86SF2	N-acetylgalactosaminyltransferase 7 [OS=Homo sapiens]	1.28581	0.776	1.74569	0.990629	0.497	1.27722	0.0512628	0.0570956	Rejected	Rejected
Q13867	bleomycin hydrolase [OS=Homo sapiens]	4.01237	1	2.28609	29.1961	0.496	70.0418	0.00796753	0.0571257	Enriched	Rejected
Q8NFH3	Nucleoporin Nup43 [OS=Homo sapiens]	1.28225	0.915	1.37519	1.00195	0.496	1.43007	0.036801	0.0571557	Rejected	Rejected
Q8N9N8	probable RNA-binding protein EIF1AD [OS=Homo sapiens]	0.988576	0.478	1.55214	0.976978	0.496	1.36335	0.0687613	0.0571858	Rejected	Rejected
Q9BYD6	39S ribosomal protein L1, mitochondrial [OS=Homo sapiens]	0.78304	0.098	1.32764	0.965869	0.495	4.09687	0.0811485	0.0572159	Rejected	Rejected
Q460N5	poly [ADP-ribose] polymerase 14 [OS=Homo sapiens]	0.170003	0.001	2.99796	2.28993	0.495	3.72097	0.08638	0.0572459	Rejected	Rejected
P52209	6-phosphogluconate dehydrogenase, decarboxylating [OS=Homo sapiens]	3.89818	0.971	3.34748	0.988395	0.494	7.02336	0.0269994	0.057276	Rejected	Rejected
Q6ZS17-4	Isoform 4 of Rho family-interacting cell polarization regulator 1 [OS=Homo sapiens]	1.1388	0.747	1.35741	1.02451	0.493	1.61427	0.0532171	0.0573061	Rejected	Rejected
O60341-2	Isoform 2 of Lysine-specific histone demethylase 1A [OS=Homo sapiens]	1.01699	0.527	1.36031	0.422228	0.493	3.52063	0.0662357	0.0573361	Rejected	Rejected
P42285	Superkiller viralicidic activity 2-like 2 [OS=Homo sapiens]	0.500388	0.003	1.62264	1.16413	0.493	3.09581	0.0858689	0.0573662	Rejected	Rejected
P50995	annexin A11 [OS=Homo sapiens]	4.35685	0.98	3.27857	0.989757	0.492	3.73445	0.0242634	0.0573963	Enriched	Rejected
Q13148-1	TAR DNA-binding protein 43 [OS=Homo sapiens]	6.1821	0.979	5.72751	1.40895	0.492	4.3469	0.0244137	0.0574263	Enriched	Rejected
Q07065	Cytoskeleton-associated protein 4 [OS=Homo sapiens]	1.42902	0.748	1.95238	0.993471	0.492	2.13774	0.0531269	0.0574564	Rejected	Rejected
Q9UN36-1	Protein NDRG2 [OS=Homo sapiens]	1.18435	0.813	1.38473	0.985121	0.491	1.40868	0.0478352	0.0574865	Rejected	Rejected
Q9NR31	GTP-binding protein SAR1a [OS=Homo sapiens]	1.06545	0.508	1.66927	1.18616	0.491	1.77834	0.0674684	0.0575165	Rejected	Rejected
O94822-3	Isoform 3 of E3 ubiquitin-protein ligase listerin [OS=Homo sapiens]	0.733548	0.116	1.50333	2.4251	0.49	3.88568	0.0805472	0.0575466	Rejected	Rejected
P49588-2	Isoform 2 of Alanine--tRNA ligase, cytoplasmic [OS=Homo sapiens]	5.34208	1	2.35362	0.988881	0.489	2.1801	0.00162357	0.0575767	Enriched	Rejected
P52272	Heterogeneous nuclear ribonucleoprotein M [OS=Homo sapiens]	2.64489	0.983	2.33148	0.831984	0.489	1.60726	0.0230908	0.0576067	Enriched	Rejected
Q9UH17-1	DNA dC->dU-editing enzyme APOBEC-3B [OS=Homo sapiens]	4.53942	0.98	4.13556	5.61045	0.489	10.359	0.0243536	0.0576368	Enriched	Rejected
Q15286	Ras-related protein Rab-35 [OS=Homo sapiens]	2.43902	0.876	2.77814	0.940984	0.489	5.5512	0.0414011	0.0576669	Rejected	Rejected
P61106	Ras-related protein Rab-14 [OS=Homo sapiens]	2.07233	0.928	2.40143	0.775337	0.488	6.77781	0.0344558	0.0576969	Rejected	Rejected
O14908-1	PDZ domain-containing protein GIPC1 [OS=Homo sapiens]	2.05393	0.824	2.6381	1.17671	0.488	5.84857	0.0465424	0.057727	Rejected	Rejected
Q14527	Helicase-like transcription factor [OS=Homo sapiens]	0.953183	0.461	1.51628	0.58823	0.488	30.9864	0.0695129	0.0577571	Rejected	Rejected
Q14008-3	Isoform 3 of Cytoskeleton-associated protein 5 [OS=Homo sapiens]	4.45438	0.982	3.90302	0.680257	0.487	4.33935	0.0234516	0.0577871	Enriched	Rejected
Q7L2H7	Eukaryotic translation initiation factor 3 subunit M [OS=Homo sapiens]	14.0649	0.946	14.5308	0.717289	0.487	4.35673	0.0319302	0.0578172	Rejected	Rejected
P36639	7,8-dihydro-8-oxoguanine triphosphatase [OS=Homo sapiens]	10.9065	1	3.24241	0.984589	0.486	4.28367	0.0097715	0.0578473	Enriched	Rejected
Q12905	Interleukin enhancer-binding factor 2 [OS=Homo sapiens]	4.14498	0.995	2.91654	0.802764	0.486	3.10815	0.0166266	0.0578773	Enriched	Rejected
Q96DG6	Carboxymethylenebutenolidase homolog [OS=Homo sapiens]	0.897711	0.274	1.32003	0.612232	0.486	2.4945	0.0750752	0.0579074	Rejected	Rejected
P49788	Retinoic acid receptor responder protein 1 [OS=Homo sapiens]	1.79299	0.869	2.16435	1.07162	0.485	3.14973	0.0420625	0.0579375	Rejected	Rejected
Q9HBI0-1	Gamma-parvin [OS=Homo sapiens]	1.0894	0.791	1.18801	0.98654	0.485	1.37229	0.0496693	0.0579675	Rejected	Rejected
Q9UKL0	REST corepressor 1 [OS=Homo sapiens]	0.951501	0.38	1.3735	0.99503	0.485	1.25926	0.0719784	0.0579976	Rejected	Rejected
P31937	3-hydroxyisobutyrate dehydrogenase, mitochondrial [OS=Homo sapiens]	0.834089	0.216	1.40762	2.71501	0.485	7.47367	0.0771197	0.0580277	Rejected	Rejected
O14950	Myosin regulatory light chain 12B [OS=Homo sapiens]	5.23977	1	2.64243	0.703749	0.484	3.5658	0.00532171	0.0580577	Enriched	Rejected
P48507	Glutamate--cysteine ligase regulatory subunit [OS=Homo sapiens]	1.02722	0.559	1.36603	0.99519	0.484	1.43934	0.0642514	0.0580878	Rejected	Rejected
P02647	Apolipoprotein A-I [OS=Homo sapiens]	3.75176	0.928	4.13074	0.635181	0.483	17.8779	0.0344859	0.0581179	Rejected	Rejected
Q9BSJ2-4	Isoform 3 of Gamma-tubulin complex component 2 [OS=Homo sapiens]	1.23718	0.773	1.55082	0.657836	0.483	2.27443	0.0514732	0.0581479	Rejected	Rejected
O95819-6	Isoform 6 of Mitogen-activated protein kinase kinase kinase kinase 4 [OS=Homo sapiens]	1.1163	0.673	1.43763	0.979737	0.483	1.46998	0.0576969	0.058178	Rejected	Rejected
Q9UJX3-1	Anaphase-promoting complex subunit 7 [OS=Homo sapiens]	0.911202	0.377	1.41414	0.988396	0.482	1.47019	0.0720686	0.0582081	Rejected	Rejected
Q9Y639-2	Neuroplastin [OS=Homo sapiens]	0.934596	0.346	1.30987	0.997203	0.482	1.56463	0.0730607	0.0582381	Rejected	Rejected
O15144	Actin-related protein 2/3 complex subunit 2 [OS=Homo sapiens]	6.70523	0.995	5.12445	0.813926	0.481	4.14761	0.0170475	0.0582682	Enriched	Rejected
P25705-1	ATP synthase subunit alpha, mitochondrial [OS=Homo sapiens]	2.29331	0.991	1.83766	0.452438	0.481	4.59539	0.0200842	0.0582983	Enriched	Rejected
Q15833-3	Isoform 3 of Syntaxin-binding protein 2 [OS=Homo sapiens]	5.851	0.783	7.10211	0.996306	0.481	2.83541	0.0503909	0.0583283	Rejected	Rejected
Q15436	protein transport protein Sec23A [OS=Homo sapiens]	9.72503	0.992	5.6102	0.924142	0.48	2.87722	0.0196031	0.0583584	Enriched	Rejected
P41091	eukaryotic translation initiation factor 2 subunit 3 [OS=Homo sapiens]	2.64457	0.965	2.48852	0.191383	0.48	13.8242	0.0285929	0.0583885	Rejected	Rejected
Q9P032	NADH dehydrogenase [ubiquinone] 1 alpha subcomplex assembly factor 4 [OS=Homo sapiens]	2.02949	0.865	2.4536	0.987438	0.48	1.37566	0.0424233	0.0584185	Rejected	Rejected
Q9Y291	28S ribosomal protein S33, mitochondrial [OS=Homo sapiens]	0.695774	0.022	1.32175	0.96075	0.48	1.58208	0.0846663	0.0584486	Rejected	Rejected
P30044-1	Peroxiredoxin-5, mitochondrial [OS=Homo sapiens]	17.3967	0.996	8.73439	0.761201	0.479	4.92637	0.0159952	0.0584787	Enriched	Rejected
P30740	Leukocyte elastase inhibitor [OS=Homo sapiens]	1.92943	0.875	2.61431	0.556016	0.479	7.60422	0.0414913	0.0585087	Rejected	Rejected
Q9UQN3-1	Charged multivesicular body protein 2b [OS=Homo sapiens]	2.84078	0.972	2.58613	0.98602	0.478	2.01642	0.0269693	0.0585388	Rejected	Rejected
P16930	Fumarylacetoacetase [OS=Homo sapiens]	1.21281	0.523	3.59232	0.979427	0.478	2.39891	0.0665063	0.0585689	Rejected	Rejected
P40926	Malate dehydrogenase, mitochondrial [OS=Homo sapiens]	2.76722	1	1.8702	0.973838	0.477	2.39379	0.00426939	0.0585989	Enriched	Rejected
Q15717-2	Isoform 2 of ELAV-like protein 1 [OS=Homo sapiens]	1.88444	0.787	3.74479	0.986913	0.477	2.26258	0.05	0.058629	Rejected	Rejected
Q9HBM1	Kinetochore protein Spc25 [OS=Homo sapiens]	1.03758	0.557	1.42777	0.993554	0.476	1.3483	0.0643416	0.058659	Rejected	Rejected
Q13435	Splicing factor 3b subunit 2 [OS=Homo sapiens]	2.07586	0.999	1.54043	0.969145	0.475	1.8684	0.0124775	0.0586891	Enriched	Rejected
Q9UHX1-2	Isoform 2 of Poly(U)-binding-splicing factor PUF60 [OS=Homo sapiens]	2.45376	0.99	1.98721	0.931948	0.475	2.0879	0.0205352	0.0587192	Enriched	Rejected
P09960-1	leukotriene A-4 hydrolase [OS=Homo sapiens]	3.15819	0.948	3.1791	0.611984	0.475	5.32966	0.0315394	0.0587492	Rejected	Rejected
P06737-1	Glycogen phosphorylase, liver form [OS=Homo sapiens]	2.92649	0.911	3.47212	0.898545	0.475	4.71859	0.0374023	0.0587793	Rejected	Rejected
P49916-1	DNA ligase 3 [OS=Homo sapiens]	0.842171	0.278	1.60197	0.969938	0.475	1.49152	0.0749549	0.0588094	Rejected	Rejected
P07305	Histone H1.0 [OS=Homo sapiens]	4.25858	0.998	3.4333	0.878912	0.474	3.23732	0.0144317	0.0588394	Enriched	Rejected
Q8WXF1	Paraspeckle component 1 [OS=Homo sapiens]	4.61024	0.993	2.85663	0.980743	0.474	2.71491	0.0191521	0.0588695	Enriched	Rejected
Q92620	Pre-mRNA-splicing factor ATP-dependent RNA helicase PRP16 [OS=Homo sapiens]	5.17477	0.974	4.71202	0.987531	0.474	2.19894	0.0260974	0.0588996	Rejected	Rejected
P51452	dual specificity protein phosphatase 3 [OS=Homo sapiens]	2.92561	0.962	2.71794	0.8362	0.474	6.89359	0.0291642	0.0589296	Rejected	Rejected
Q02818	Nucleobindin-1 [OS=Homo sapiens]	5.26614	0.796	7.19401	0.352894	0.474	7.54565	0.0491581	0.0589597	Rejected	Rejected
Q9UL46	proteasome activator complex subunit 2 [OS=Homo sapiens]	3.32969	0.994	2.85641	0.386918	0.472	5.2293	0.0177992	0.0589898	Enriched	Rejected
P61619	Protein transport protein Sec61 subunit alpha isoform 1 [OS=Homo sapiens]	1.37993	0.64	2.99492	0.863606	0.472	2.19906	0.0595009	0.0590198	Rejected	Rejected
P52294	Importin subunit alpha-5 [OS=Homo sapiens]	0.208175	0.001	2.16534	0.557631	0.472	2.98369	0.0861996	0.0590499	Rejected	Rejected
Q8WWC4	m-AAA protease-interacting protein 1, mitochondrial [OS=Homo sapiens]	2.74614	0.816	3.1719	0.894918	0.471	2.41675	0.0476248	0.05908	Rejected	Rejected
P21281	V-type proton ATPase subunit B, brain isoform [OS=Homo sapiens]	1.62302	0.759	2.16971	0.311902	0.471	6.36699	0.0523752	0.05911	Rejected	Rejected
Q16543	Hsp90 co-chaperone Cdc37 [OS=Homo sapiens]	2.03914	0.938	2.14259	0.870793	0.47	2.21807	0.0328924	0.0591401	Rejected	Rejected
P07996	thrombospondin-1 [OS=Homo sapiens]	0.416837	0.098	2.64201	0.0346417	0.47	36.9834	0.0811185	0.0591702	Rejected	Rejected
Q9UM00-1	Calcium load-activated calcium channel [OS=Homo sapiens]	1.20808	0.764	1.58034	0.960813	0.469	1.48657	0.0521948	0.0592002	Rejected	Rejected
Q15477	Helicase SKI2W [OS=Homo sapiens]	1.1072	0.673	1.39029	0.965917	0.469	1.90881	0.057727	0.0592303	Rejected	Rejected
O15160	DNA-directed RNA polymerases I and III subunit RPAC1 [OS=Homo sapiens]	0.75541	0.198	1.50562	0.990864	0.469	1.3219	0.0778112	0.0592604	Rejected	Rejected
Q9Y3I0	tRNA-splicing ligase RtcB homolog [OS=Homo sapiens]	1.39828	0.813	1.81538	0.960846	0.467	2.36531	0.0478052	0.0592904	Rejected	Rejected
O95235	kinesin-like protein KIF20A [OS=Homo sapiens]	0.704074	0.447	3.25781	0.540627	0.467	9.79186	0.069994	0.0593205	Rejected	Rejected
P31483	nucleolysin TIA-1 isoform p40 [OS=Homo sapiens]	0.455497	0.081	2.46439	0.752023	0.467	17.8909	0.0821407	0.0593506	Rejected	Rejected
Q92917	G patch domain and KOW motifs-containing protein [OS=Homo sapiens]	0.54645	0.254	2.20811	0.291671	0.466	6.70507	0.075887	0.0593806	Rejected	Rejected
Q15149-1	plectin [OS=Homo sapiens]	0.594625	0.248	3.06154	0.999948	0.466	1.29314	0.0760373	0.0594107	Rejected	Rejected
Q7Z3B4	Nucleoporin p54 [OS=Homo sapiens]	0.820351	0.242	1.54752	0.978617	0.466	1.28055	0.0762778	0.0594408	Rejected	Rejected
Q9H0B6	Kinesin light chain 2 [OS=Homo sapiens]	0.83695	0.227	1.40466	0.979783	0.466	1.66691	0.0767288	0.0594708	Rejected	Rejected
P01011-1	Alpha-1-antichymotrypsin [OS=Homo sapiens]	2.78482	0.847	3.9492	0.0139126	0.465	122.263	0.0443476	0.0595009	Rejected	Rejected
P35240-2	Isoform 2 of Merlin [OS=Homo sapiens]	0.840563	0.153	1.32886	0.995633	0.465	1.56333	0.0792544	0.059531	Rejected	Rejected
P62829	60S ribosomal protein L23 [OS=Homo sapiens]	53.3967	1	5.26201	0.461281	0.464	8.28655	0.00757667	0.059561	Enriched	Rejected
P42858	huntingtin [OS=Homo sapiens]	1.23108	0.867	1.36016	0.988288	0.464	1.43444	0.042273	0.0595911	Rejected	Rejected
P80303	Nucleobindin-2 [OS=Homo sapiens]	11.9204	0.97	8.06656	0.0698623	0.463	34.4936	0.0275105	0.0596212	Rejected	Rejected
Q01658	Protein Dr1 [OS=Homo sapiens]	0.94271	0.398	1.43485	0.973609	0.462	1.62313	0.0714672	0.0596512	Rejected	Rejected
P62318	small nuclear ribonucleoprotein sm d3 [OS=Homo sapiens]	3.77359	0.994	2.76826	0.263541	0.459	5.16334	0.0180397	0.0596813	Enriched	Rejected
Q9UBN7-1	histone deacetylase 6 [OS=Homo sapiens]	0.794051	0.166	1.48374	0.748976	0.458	2.4098	0.0786831	0.0597114	Rejected	Rejected
Q8IY81	pre-rRNA processing protein FTSJ3 [OS=Homo sapiens]	2.14276	0.759	2.79816	0.987262	0.457	3.18148	0.0523452	0.0597414	Rejected	Rejected
Q9NV96	Cell cycle control protein 50A [OS=Homo sapiens]	1.05885	0.617	1.35353	0.98953	0.457	1.26913	0.0609741	0.0597715	Rejected	Rejected
Q16401	26S proteasome non-ATPase regulatory subunit 5 [OS=Homo sapiens]	1.60099	0.659	3.16709	0.837261	0.456	3.72216	0.0583283	0.0598016	Rejected	Rejected
P04279-2	Isoform 2 of Semenogelin-1 [OS=Homo sapiens]	0.825446	0.218	1.55002	0.958962	0.456	1.453	0.0769994	0.0598316	Rejected	Rejected
Q15631-1	Translin [OS=Homo sapiens]	7.83793	0.989	3.42154	0.770475	0.455	2.45323	0.0209862	0.0598617	Enriched	Rejected
Q8N1G4	Leucine-rich repeat-containing protein 47 [OS=Homo sapiens]	2.94367	0.93	3.11935	0.985058	0.455	1.62026	0.0342153	0.0598918	Rejected	Rejected
P28370-1	Probable global transcription activator SNF2L1 [OS=Homo sapiens]	1.06569	0.608	1.57884	0.981984	0.455	1.37447	0.0615454	0.0599218	Rejected	Rejected
P25942-1	Tumor necrosis factor receptor superfamily member 5 [OS=Homo sapiens]	2.24743	0.961	2.22263	0.957679	0.454	1.43877	0.0293446	0.0599519	Rejected	Rejected
Q7Z2Z2	Elongation factor-like GTPase 1 [OS=Homo sapiens]	0.782041	0.151	1.39999	0.982815	0.454	1.30425	0.0793446	0.059982	Rejected	Rejected
O75607	Nucleoplasmin-3 [OS=Homo sapiens]	1.33028	0.92	1.37975	0.847764	0.453	2.04178	0.0361094	0.060012	Rejected	Rejected
Q9Y316-3	Isoform 3 of Protein MEMO1 [OS=Homo sapiens]	1.08601	0.616	1.41771	0.982785	0.453	1.25084	0.0610042	0.0600421	Rejected	Rejected
Q5VTR2	E3 ubiquitin-protein ligase BRE1A [OS=Homo sapiens]	1.20444	0.831	1.39178	0.961472	0.452	1.37962	0.0459411	0.0600722	Rejected	Rejected
P52926-1	high mobility group protein HMGI-C [OS=Homo sapiens]	0.70546	0.053	1.42102	0.952895	0.452	1.5071	0.0830728	0.0601022	Rejected	Rejected
[truncated: 882 more rows]

## Sheet: HSC70 - SOD1 (A4V) High
Uniprot Accession	Description	Untreated Enrichment Score	Untreated Percentile	Untreated 95%	Treated Enrichment Score	Treated Percentile	Treated 95%	Untreated B-H Corrected Q 0.05	Treated B-H Corrected Q 0.05	Untreated Enrichment	Treated Enrichment
Q09666-1	Neuroblast differentiation-associated protein AHNAK [OS=Homo sapiens]	3.35576	1	1.96503	2.18179	1	1.45968	3.00661e-05	3.00661e-05	Enriched	Enriched
P35579-1	Myosin-9 [OS=Homo sapiens]	2.98951	1	1.67229	6.76147	1	2.72332	6.01323e-05	6.01323e-05	Enriched	Enriched
P21333	Filamin-A [OS=Homo sapiens]	4.48394	1	1.63802	3.74943	1	1.9674	9.01984e-05	9.01984e-05	Enriched	Enriched
Q9Y490	Talin-1 [OS=Homo sapiens]	3.36747	1	1.78204	3.36381	1	2.05602	0.000120265	0.000120265	Enriched	Enriched
Q14315	Filamin-C [OS=Homo sapiens]	3.74881	1	1.86891	1.08553	0.616	1.4301	0.000150331	0.0488274	Enriched	Rejected
P49327	Fatty acid synthase [OS=Homo sapiens]	5.05084	1	1.73722	3.44066	1	1.74774	0.000180397	0.000150331	Enriched	Enriched
P08238	Heat shock protein HSP 90-beta [OS=Homo sapiens]	9.38512	1	2.04412	6.28203	1	2.03374	0.000210463	0.000180397	Enriched	Enriched
P07900-2	Isoform 2 of Heat shock protein HSP 90-alpha [OS=Homo sapiens]	10.3989	1	1.97042	6.2572	1	1.92129	0.000240529	0.000210463	Enriched	Enriched
Q01082-1	Spectrin beta chain, non-erythrocytic 1 [OS=Homo sapiens]	2.4743	1	1.68873	1.59282	0.98	1.45192	0.000270595	0.0152135	Enriched	Rejected
Q13085-4	Isoform 4 of Acetyl-CoA carboxylase 1 [OS=Homo sapiens]	5.14146	1	1.80579	2.406	0.996	1.78648	0.000300661	0.00856885	Enriched	Enriched
P13639	Elongation factor 2 [OS=Homo sapiens]	3.37241	1	1.89626	3.94188	0.979	3.16772	0.000330728	0.0156645	Enriched	Rejected
P0DMV8	heat shock 70 kDa protein 1A [OS=Homo sapiens]	10.2649	1	2.50441	1.45618	0.715	2.9058	0.000360794	0.0427541	Enriched	Rejected
P08670	Vimentin [OS=Homo sapiens]	3.21057	1	1.68072	1.65003	0.987	1.44558	0.00039086	0.0128382	Enriched	Rejected
P04406-1	glyceraldehyde-3-phosphate dehydrogenase [OS=Homo sapiens]	3.10507	1	1.73051	1.6357	0.991	1.42955	0.000420926	0.0113349	Enriched	Enriched
P55072	Transitional endoplasmic reticulum ATPase [OS=Homo sapiens]	5.18107	1	1.79454	4.10369	1	2.19407	0.000450992	0.000240529	Enriched	Enriched
P07437	tubulin beta chain [OS=Homo sapiens]	8.5473	1	2.28932	3.43738	0.999	2.03869	0.000481058	0.00526158	Enriched	Enriched
P34932	Heat shock 70 kDa protein 4 [OS=Homo sapiens]	14.3275	1	3.3097	6.41737	1	2.40173	0.000511124	0.000270595	Enriched	Enriched
P11498	pyruvate carboxylase, mitochondrial [OS=Homo sapiens]	4.21044	1	1.74514	4.17565	1	1.84629	0.000541191	0.000300661	Enriched	Enriched
P26038	Moesin [OS=Homo sapiens]	5.0105	1	2.01197	1.76668	0.876	2.3057	0.000571257	0.0305472	Enriched	Rejected
P05165-1	Propionyl-CoA carboxylase alpha chain, mitochondrial [OS=Homo sapiens]	3.61767	1	1.79958	3.92594	1	1.67116	0.000601323	0.000330728	Enriched	Enriched
P06733-1	alpha-enolase [OS=Homo sapiens]	2.95414	1	1.78361	2.23698	0.995	1.73015	0.000631389	0.00923031	Enriched	Enriched
P31948-2	Isoform 2 of Stress-induced-phosphoprotein 1 [OS=Homo sapiens]	2.75447	1	1.80548	4.95218	1	2.1518	0.000661455	0.000360794	Enriched	Enriched
P22314	Ubiquitin-like modifier-activating enzyme 1 [OS=Homo sapiens]	15.1466	1	2.484	6.41498	1	2.35974	0.000691521	0.00039086	Enriched	Enriched
Q13200	26S proteasome non-ATPase regulatory subunit 2 [OS=Homo sapiens]	8.76755	1	2.20799	10.1014	1	3.27056	0.000721587	0.000420926	Enriched	Enriched
P15924-1	Desmoplakin [OS=Homo sapiens]	2.99742	1	1.83162	1.50098	0.981	1.37516	0.000751654	0.0148827	Enriched	Rejected
P50990	T-complex protein 1 subunit theta [OS=Homo sapiens]	3.86622	1	1.66729	2.91353	1	1.95078	0.00078172	0.000450992	Enriched	Enriched
Q08211	Atp-dependent rna helicase a [OS=Homo sapiens]	2.11341	1	1.6043	0.930226	0.516	2.21871	0.000811786	0.0548707	Enriched	Rejected
P18206	Vinculin [OS=Homo sapiens]	4.72056	1	2.09056	0.909866	0.507	2.72912	0.000841852	0.0554119	Enriched	Rejected
P07814	Bifunctional glutamate/proline--tRNA ligase [OS=Homo sapiens]	3.16978	1	1.96378	2.21488	0.992	1.7322	0.000871918	0.0109741	Enriched	Enriched
Q02790	Peptidyl-prolyl cis-trans isomerase FKBP4 [OS=Homo sapiens]	3.66957	1	1.95434	4.26728	1	2.37063	0.000901984	0.000481058	Enriched	Enriched
P07355-2	Isoform 2 of Annexin A2 [OS=Homo sapiens]	2.85748	1	1.69489	2.87261	1	1.82622	0.000932051	0.000511124	Enriched	Enriched
P09651-1	Heterogeneous nuclear ribonucleoprotein A1 [OS=Homo sapiens]	2.0551	1	1.43538	3.60295	1	2.07739	0.000962117	0.000541191	Enriched	Enriched
P07195	L-lactate dehydrogenase B chain [OS=Homo sapiens]	6.54662	1	1.98652	4.34243	1	2.31708	0.000992183	0.000571257	Enriched	Enriched
Q13748-1	tubulin alpha-3C/D chain [OS=Homo sapiens]	3.47435	1	2.0948	2.71252	0.766	7.64431	0.00102225	0.0394768	Enriched	Rejected
Q99832	T-complex protein 1 subunit eta [OS=Homo sapiens]	2.37535	1	1.72642	4.99812	0.913	6.09773	0.00105232	0.0269393	Enriched	Rejected
O75643-1	U5 small nuclear ribonucleoprotein 200 kDa helicase [OS=Homo sapiens]	4.39875	1	2.23592	4.48386	1	2.5652	0.00108238	0.000601323	Enriched	Enriched
P46940	Ras GTPase-activating-like protein IQGAP1 [OS=Homo sapiens]	3.14575	1	2.51144	1.06917	0.553	1.74385	0.00111245	0.0525857	Enriched	Rejected
P27816-1	Microtubule-associated protein 4 [OS=Homo sapiens]	2.03029	1	1.46426	2.36932	1	1.59517	0.00114251	0.000631389	Enriched	Enriched
P48681	Nestin [OS=Homo sapiens]	2.59188	1	1.5069	2.06652	1	1.4997	0.00117258	0.000661455	Enriched	Enriched
P22626	heterogeneous nuclear ribonucleoproteins A2/B1 [OS=Homo sapiens]	3.0313	1	1.77123	1.986	1	1.48436	0.00120265	0.000691521	Enriched	Enriched
P49321	Nuclear autoantigenic sperm protein [OS=Homo sapiens]	3.07542	1	1.83467	3.20724	1	1.82725	0.00123271	0.000721587	Enriched	Enriched
P05023	Sodium/potassium-transporting ATPase subunit alpha-1 [OS=Homo sapiens]	6.15798	1	2.1668	7.36871	1	3.5093	0.00126278	0.000751654	Enriched	Enriched
P00338-3	Isoform 3 of L-lactate dehydrogenase A chain [OS=Homo sapiens]	4.47937	1	2.38435	6.65812	1	2.40637	0.00129284	0.00078172	Enriched	Enriched
P15311	Ezrin [OS=Homo sapiens]	6.16216	1	2.39942	1.37143	0.733	2.46463	0.00132291	0.0415514	Enriched	Rejected
P05783	Keratin, type I cytoskeletal 18 [OS=Homo sapiens]	2.4248	1	1.47077	3.05304	1	2.06433	0.00135298	0.000811786	Enriched	Enriched
P11586	C-1-tetrahydrofolate synthase, cytoplasmic [OS=Homo sapiens]	4.01859	1	2.27541	1.91097	0.958	1.84382	0.00138304	0.0200842	Enriched	Rejected
P23246-1	splicing factor, proline- and glutamine-rich [OS=Homo sapiens]	3.0795	1	1.79556	1.03898	0.517	1.91563	0.00141311	0.0547204	Enriched	Rejected
Q04637-9	Isoform 9 of Eukaryotic translation initiation factor 4 gamma 1 [OS=Homo sapiens]	2.04144	1	1.53484	3.40377	0.998	2.27314	0.00144317	0.00643416	Enriched	Enriched
P49368-1	T-complex protein 1 subunit gamma [OS=Homo sapiens]	3.06967	1	1.93132	3.62638	0.984	3.21754	0.00147324	0.0140108	Enriched	Rejected
P53396-1	ATP-citrate synthase [OS=Homo sapiens]	8.61444	1	4.71401	0.772763	0.247	1.90118	0.00150331	0.0691521	Enriched	Rejected
P00558	phosphoglycerate kinase 1 [OS=Homo sapiens]	4.52268	1	2.18083	3.04832	1	2.01694	0.00153337	0.000841852	Enriched	Enriched
O75533-1	splicing factor 3B subunit 1 [OS=Homo sapiens]	3.5406	1	1.822	4.28283	1	2.60931	0.00156344	0.000871918	Enriched	Enriched
Q9Y2J2-2	Isoform 2 of Band 4.1-like protein 3 [OS=Homo sapiens]	2.34034	1	1.68654	3.20257	0.995	1.98884	0.00159351	0.00926037	Enriched	Enriched
P40939	Trifunctional enzyme subunit alpha, mitochondrial [OS=Homo sapiens]	1.64847	1	1.35815	3.35046	0.997	2.04667	0.00162357	0.00748647	Enriched	Enriched
P19338	Nucleolin [OS=Homo sapiens]	2.73408	1	1.69382	1.2186	0.859	1.40603	0.00165364	0.0319904	Enriched	Rejected
Q15233	Non-POU domain-containing octamer-binding protein [OS=Homo sapiens]	2.87503	1	1.92123	5.09227	1	3.63737	0.0016837	0.000901984	Enriched	Enriched
P27348	14-3-3 protein theta [OS=Homo sapiens]	4.4002	1	2.05937	4.87285	1	2.22833	0.00171377	0.000932051	Enriched	Enriched
P25205-2	Isoform 2 of DNA replication licensing factor MCM3 [OS=Homo sapiens]	4.99205	1	1.86062	2.77379	0.861	3.7609	0.00174384	0.0316897	Enriched	Rejected
Q12906-7	Isoform 7 of Interleukin enhancer-binding factor 3 [OS=Homo sapiens]	5.08003	1	3.25686	5.21071	1	2.62376	0.0017739	0.000962117	Enriched	Enriched
P26641-2	Isoform 2 of Elongation factor 1-gamma [OS=Homo sapiens]	4.5161	1	1.95918	2.00795	0.947	2.02305	0.00180397	0.0217378	Enriched	Rejected
P45974-1	Ubiquitin carboxyl-terminal hydrolase 5 [OS=Homo sapiens]	22.7707	1	2.48366	1.93587	0.775	3.8368	0.00183403	0.0387252	Enriched	Rejected
P60174	Triosephosphate isomerase [OS=Homo sapiens]	2.90368	1	1.86712	5.08629	1	2.23002	0.0018641	0.000992183	Enriched	Enriched
Q96RQ3	Methylcrotonoyl-CoA carboxylase subunit alpha, mitochondrial [OS=Homo sapiens]	4.80623	1	2.2003	19.512	1	9.79182	0.00189417	0.00102225	Enriched	Enriched
P05556-1	Integrin beta-1 [OS=Homo sapiens]	2.99254	1	1.72481	3.35487	0.996	2.12496	0.00192423	0.00859892	Enriched	Enriched
P31946	14-3-3 protein beta/alpha [OS=Homo sapiens]	4.4843	1	2.13685	2.05675	0.668	4.1303	0.0019543	0.04546	Enriched	Rejected
Q14566	DNA replication licensing factor MCM6 [OS=Homo sapiens]	2.09568	1	1.67789	0.295478	0.052	3.19212	0.00198437	0.0814191	Enriched	Rejected
P06748	Nucleophosmin [OS=Homo sapiens]	2.2517	1	1.51619	2.2099	1	1.58357	0.00201443	0.00105232	Enriched	Enriched
P46060	Ran GTPase-activating protein 1 [OS=Homo sapiens]	2.32397	1	1.47918	2.48877	1	1.81548	0.0020445	0.00108238	Enriched	Enriched
P25705-1	ATP synthase subunit alpha, mitochondrial [OS=Homo sapiens]	2.68141	1	1.80485	2.21138	0.979	1.86049	0.00207456	0.0156945	Enriched	Rejected
P36578	60S ribosomal protein L4 [OS=Homo sapiens]	3.0688	1	1.76826	1.58638	0.96	1.55891	0.00210463	0.0196031	Enriched	Rejected
P18669	Phosphoglycerate mutase 1 [OS=Homo sapiens]	2.16019	1	1.5645	8.68701	0.99	6.64655	0.0021347	0.0117559	Enriched	Enriched
Q15365	Poly(RC)-binding protein 1 [OS=Homo sapiens]	2.69843	1	1.6369	1.30146	0.867	1.47612	0.00216476	0.0309681	Enriched	Rejected
P46013	Proliferation marker protein Ki-67 [OS=Homo sapiens]	1.74551	1	1.35105	2.04097	1	1.57083	0.00219483	0.00111245	Enriched	Enriched
Q13263	Transcription intermediary factor 1-beta [OS=Homo sapiens]	3.64237	1	2.03955	3.00048	0.991	2.19431	0.00222489	0.011365	Enriched	Enriched
P37802-2	Isoform 2 of Transgelin-2 [OS=Homo sapiens]	2.34277	1	1.46698	1.93365	0.976	1.72063	0.00225496	0.0162959	Enriched	Rejected
P14923	Junction plakoglobin [OS=Homo sapiens]	3.28282	1	2.08374	1.08291	0.621	1.4902	0.00228503	0.0484366	Enriched	Rejected
O00159-1	Unconventional myosin-Ic [OS=Homo sapiens]	2.12858	1	1.68414	2.96271	0.954	2.89831	0.00231509	0.0207156	Enriched	Rejected
Q9Y265	RuvB-like 1 [OS=Homo sapiens]	2.02633	1	1.44521	1.76176	0.999	1.46344	0.00234516	0.00529164	Enriched	Enriched
Q14203	Dynactin subunit 1 [OS=Homo sapiens]	22.884	1	2.71088	1.07346	0.51	3.04187	0.00237523	0.0552014	Enriched	Rejected
Q05682-5	Isoform 5 of Caldesmon [OS=Homo sapiens]	4.02586	1	2.40762	2.3539	0.999	1.66647	0.00240529	0.00532171	Enriched	Enriched
Q15046-2	Isoform Mitochondrial of Lysine--tRNA ligase [OS=Homo sapiens]	10.5021	1	3.11187	0.334	0.104	3.37224	0.00243536	0.0773001	Enriched	Rejected
Q9UQ80	proliferation-associated protein 2G4 [OS=Homo sapiens]	4.54714	1	2.2413	5.83984	1	2.51173	0.00246542	0.00114251	Enriched	Enriched
P22234	multifunctional protein ADE2 [OS=Homo sapiens]	4.36354	1	2.11473	2.26364	0.997	1.78454	0.00249549	0.00751654	Enriched	Enriched
Q9Y678	Coatomer subunit gamma-1 [OS=Homo sapiens]	6.07243	1	2.18035	1.41828	0.718	2.33216	0.00252556	0.0425135	Enriched	Rejected
P63241-2	Isoform 2 of Eukaryotic translation initiation factor 5A-1 [OS=Homo sapiens]	2.65244	1	1.71964	8.73878	1	3.77047	0.00255562	0.00117258	Enriched	Enriched
P27797	Calreticulin [OS=Homo sapiens]	2.56929	1	1.84056	2.51425	0.97	2.22127	0.00258569	0.0175286	Enriched	Rejected
P22392-2	Isoform 3 of Nucleoside diphosphate kinase B [OS=Homo sapiens]	3.01903	1	1.86574	3.68012	0.966	3.31611	0.00261575	0.01816	Enriched	Rejected
Q86T24	Transcriptional regulator Kaiso [OS=Homo sapiens]	2.77808	1	1.52629	2.63366	1	1.53257	0.00264582	0.00120265	Enriched	Enriched
P61247	40S ribosomal protein S3a [OS=Homo sapiens]	2.83332	1	1.68375	2.75413	0.998	1.93753	0.00267589	0.00646422	Enriched	Enriched
P46777	60S ribosomal protein L5 [OS=Homo sapiens]	3.33562	1	2.23337	5.70928	1	2.36895	0.00270595	0.00123271	Enriched	Enriched
P38606	V-type proton ATPase catalytic subunit A [OS=Homo sapiens]	2.64341	1	1.68935	3.81166	1	2.01745	0.00273602	0.00126278	Enriched	Enriched
Q13283	Ras GTPase-activating protein-binding protein 1 [OS=Homo sapiens]	4.14887	1	2.1802	3.21509	0.974	2.65523	0.00276609	0.0168972	Enriched	Rejected
P62805	histone H4 [OS=Homo sapiens]	2.74732	1	1.73591	1.53783	0.841	1.9662	0.00279615	0.0332532	Enriched	Rejected
Q16658	Fascin [OS=Homo sapiens]	1.84489	1	1.44686	2.90821	1	1.95493	0.00282622	0.00129284	Enriched	Enriched
P62191	26S proteasome regulatory subunit 4 [OS=Homo sapiens]	7.7053	1	2.43433	0.975487	0.472	2.24525	0.00285628	0.058178	Enriched	Rejected
P00505	Aspartate aminotransferase, mitochondrial [OS=Homo sapiens]	10.0785	1	2.37207	2.48774	0.843	3.3161	0.00288635	0.0330728	Enriched	Rejected
P42224-1	Signal transducer and activator of transcription 1-alpha/beta [OS=Homo sapiens]	3.7552	1	1.68979	0.823233	0.339	2.17775	0.00291642	0.0645219	Enriched	Rejected
P04279-1	Semenogelin-1 [OS=Homo sapiens]	9.5439	1	2.81519	257.189	0.985	206.94	0.00294648	0.0135899	Enriched	Rejected
Q8TEX9-2	Isoform 2 of Importin-4 [OS=Homo sapiens]	1109.54	1	2.94618	1.05927	0.56	1.95996	0.00297655	0.0522249	Enriched	Rejected
P62140	Serine/threonine-protein phosphatase PP1-beta catalytic subunit [OS=Homo sapiens]	2.34636	1	1.52773	0.620834	0.287	4.65157	0.00300661	0.0672279	Enriched	Rejected
P23526-1	Adenosylhomocysteinase [OS=Homo sapiens]	4.58749	1	1.86714	1.99207	0.985	1.73272	0.00303668	0.01362	Enriched	Rejected
P35998	26S proteasome regulatory subunit 7 [OS=Homo sapiens]	14.381	1	2.76729	0.513614	0.181	2.38778	0.00306675	0.0728503	Enriched	Rejected
P52292	Importin subunit alpha-1 [OS=Homo sapiens]	29.3407	1	6.92518	1.44754	0.797	2.18957	0.00309681	0.0371618	Enriched	Rejected
Q99615-1	DnaJ homolog subfamily C member 7 [OS=Homo sapiens]	5.75406	1	2.54231	7.57812	1	2.45426	0.00312688	0.00132291	Enriched	Enriched
Q9ULH7-5	Isoform 5 of MKL/myocardin-like protein 2 [OS=Homo sapiens]	3.40614	1	1.67606	3.36532	1	1.81346	0.00315695	0.00135298	Enriched	Enriched
Q99613	Eukaryotic translation initiation factor 3 subunit C [OS=Homo sapiens]	5.89374	1	2.57108	1.18206	0.566	3.292	0.00318701	0.0518641	Enriched	Rejected
Q13428-4	Isoform 4 of Treacle protein [OS=Homo sapiens]	2.73679	1	1.7063	3.56958	1	2.00012	0.00321708	0.00138304	Enriched	Enriched
P49419-2	Isoform 2 of Alpha-aminoadipic semialdehyde dehydrogenase [OS=Homo sapiens]	3.1295	1	1.92572	9.80392	0.995	4.95162	0.00324714	0.00929044	Enriched	Enriched
Q9Y266	nuclear migration protein nudC [OS=Homo sapiens]	2.1174	1	1.4299	3.90756	1	2.13899	0.00327721	0.00141311	Enriched	Enriched
Q02878	60S ribosomal protein L6 [OS=Homo sapiens]	2.64952	1	1.70204	0.739829	0.336	2.41138	0.00330728	0.0646121	Enriched	Rejected
Q9Y696	Chloride intracellular channel protein 4 [OS=Homo sapiens]	5.82804	1	2.25883	30.9016	1	5.57181	0.00333734	0.00144317	Enriched	Enriched
Q02413	Desmoglein-1 [OS=Homo sapiens]	2.99115	1	1.82938	1.43178	0.889	1.5816	0.00336741	0.0294047	Enriched	Rejected
P23396-1	40S ribosomal protein S3 [OS=Homo sapiens]	7.10287	1	3.03368	1.27359	0.699	2.8755	0.00339747	0.0438064	Enriched	Rejected
P17812	CTP synthase 1 [OS=Homo sapiens]	1.99972	1	1.49577	1.76656	0.975	1.64447	0.00342754	0.0166266	Enriched	Rejected
O60664-1	Perilipin-3 [OS=Homo sapiens]	8.73648	1	2.18803	2.87567	1	1.83042	0.00345761	0.00147324	Enriched	Enriched
P62906	60S ribosomal protein L10A [OS=Homo sapiens]	2.93508	1	1.71457	0.406279	0.076	3.20006	0.00348767	0.0794949	Enriched	Rejected
Q99497	protein DJ-1 [OS=Homo sapiens]	3.46965	1	1.92186	4.13066	0.951	4.13066	0.00351774	0.0212267	Enriched	Rejected
Q8N1N4	Keratin, type II cytoskeletal 78 [OS=Homo sapiens]	2.62241	1	1.66057	1.35129	0.878	1.54569	0.00354781	0.0303969	Enriched	Rejected
P54886	delta-1-pyrroline-5-carboxylate synthase [OS=Homo sapiens]	6.32413	1	2.40988	2.00446	0.912	2.19937	0.00357787	0.0270896	Enriched	Rejected
P23588	eukaryotic translation initiation factor 4B [OS=Homo sapiens]	2.27691	1	1.58197	1.98324	0.937	2.08625	0.00360794	0.023181	Enriched	Rejected
O75131	Copine-3 [OS=Homo sapiens]	4.85948	1	2.17555	2.46275	0.973	2.05119	0.003638	0.0171377	Enriched	Rejected
Q15459	splicing factor 3A subunit 1 [OS=Homo sapiens]	2.81585	1	1.8342	1.65873	0.885	2.05302	0.00366807	0.0297655	Enriched	Rejected
P25786-2	Isoform Long of Proteasome subunit alpha type-1 [OS=Homo sapiens]	3.28072	1	2.04149	1.16744	0.644	1.97937	0.00369814	0.0471437	Enriched	Rejected
P50502	Hsc70-interacting protein [OS=Homo sapiens]	14.3953	1	2.30797	33.1285	1	4.69716	0.0037282	0.00150331	Enriched	Enriched
Q14247-1	Src substrate cortactin [OS=Homo sapiens]	2.19791	1	1.46978	3.42059	1	1.76866	0.00375827	0.00153337	Enriched	Enriched
P62333	26S proteasome regulatory subunit 10B [OS=Homo sapiens]	5.08699	1	1.90224	7.5314	1	3.79327	0.00378833	0.00156344	Enriched	Enriched
Q9UKY7	Protein CDV3 homolog [OS=Homo sapiens]	2.3034	1	1.56018	1.73095	0.659	2.78304	0.0038184	0.0461816	Enriched	Rejected
P61586	Transforming protein RhoA [OS=Homo sapiens]	4.15174	1	2.30547	0.935081	0.461	4.81603	0.00384847	0.0587192	Enriched	Rejected
Q9HB71	Calcyclin-binding protein [OS=Homo sapiens]	5.78114	1	2.83918	4.50337	0.96	4.22781	0.00387853	0.0196332	Enriched	Rejected
Q14683	structural maintenance of chromosomes protein 1a [OS=Homo sapiens]	3.15486	1	1.92319	0.349487	0.247	5.91652	0.0039086	0.0691822	Enriched	Rejected
Q15366-3	Isoform 3 of Poly(rC)-binding protein 2 [OS=Homo sapiens]	8.38752	1	2.41382	0.857839	0.357	2.84228	0.00393867	0.0640108	Enriched	Rejected
A0AVT1-1	Ubiquitin-like modifier-activating enzyme 6 [OS=Homo sapiens]	5.84174	1	1.9859	8.58875	1	2.49765	0.00396873	0.00159351	Enriched	Enriched
P62826	GTP-binding nuclear protein RAN [OS=Homo sapiens]	7.56442	1	2.23372	1.42757	0.79	1.98572	0.0039988	0.0375827	Enriched	Rejected
P60228	Eukaryotic translation initiation factor 3 subunit E [OS=Homo sapiens]	5.36331	1	2.2706	0.74567	0.423	2.4294	0.00402886	0.0607637	Enriched	Rejected
Q9BY44-1	Eukaryotic translation initiation factor 2A [OS=Homo sapiens]	11.1012	1	2.84772	2.01071	0.988	1.71878	0.00405893	0.0125075	Enriched	Enriched
P46459	Vesicle-fusing ATPase [OS=Homo sapiens]	4.96637	1	2.31947	1.68816	0.897	1.94735	0.004089	0.028653	Enriched	Rejected
P60900	Proteasome subunit alpha type-6 [OS=Homo sapiens]	4.66404	1	2.59385	1.34955	0.681	2.60861	0.00411906	0.0448587	Enriched	Rejected
P20618	proteasome subunit beta type-1 [OS=Homo sapiens]	3.30859	1	1.96057	0.969323	0.476	2.68426	0.00414913	0.0578473	Enriched	Rejected
P16403	Histone H1.2 [OS=Homo sapiens]	4.49327	1	2.34866	5.03492	0.995	2.76144	0.00417919	0.00932051	Enriched	Enriched
Q92922	SWI/SNF complex subunit SMARCC1 [OS=Homo sapiens]	6.37214	1	3.97054	1.10543	0.558	3.13031	0.00420926	0.0523151	Enriched	Rejected
O95433	activator of 90 kDa heat shock protein ATPase homolog 1 [OS=Homo sapiens]	3.54198	1	2.09043	7.92475	1	2.96638	0.00423933	0.00162357	Enriched	Enriched
P09525	annexin A4 [OS=Homo sapiens]	3.18713	1	1.9345	4.21589	0.999	2.30467	0.00426939	0.00535177	Enriched	Enriched
P78559-2	Isoform 2 of Microtubule-associated protein 1A [OS=Homo sapiens]	5.34826	1	2.06394	3.20552	1	2.00707	0.00429946	0.00165364	Enriched	Enriched
Q14157-5	Isoform 5 of Ubiquitin-associated protein 2-like [OS=Homo sapiens]	2.05644	1	1.5273	0.429978	0.156	2.86686	0.00432952	0.0743536	Enriched	Rejected
P55265-4	Isoform 4 of Double-stranded RNA-specific adenosine deaminase [OS=Homo sapiens]	5.8727	1	1.95663	2.13167	0.927	2.29158	0.00435959	0.0247745	Enriched	Rejected
P51149	ras-related protein Rab-7a [OS=Homo sapiens]	7.11768	1	2.66053	16.6358	0.986	11.9265	0.00438966	0.013199	Enriched	Rejected
Q6KB66	Keratin, type II cytoskeletal 80 [OS=Homo sapiens]	3.27325	1	1.70655	2.11054	0.997	1.57277	0.00441972	0.0075466	Enriched	Enriched
Q13501-1	sequestosome-1 [OS=Homo sapiens]	65.6969	1	2.73613	3.6423	0.995	2.27071	0.00444979	0.00935057	Enriched	Enriched
O75182-1	paired amphipathic helix protein sin3b [OS=Homo sapiens]	3.89704	1	1.78348	2.66515	1	1.67012	0.00447986	0.0016837	Enriched	Enriched
Q9H0U4	ras-related protein Rab-1B [OS=Homo sapiens]	7.98323	1	2.41808	0.73945	0.499	3.1273	0.00450992	0.0561636	Enriched	Rejected
Q5T749	Keratinocyte proline-rich protein [OS=Homo sapiens]	3.90997	1	2.04266	0.847577	0.375	1.71769	0.00453999	0.0630186	Enriched	Rejected
P13804-1	Electron transfer flavoprotein subunit alpha, mitochondrial [OS=Homo sapiens]	9.37762	1	2.47671	12.3787	1	4.82377	0.00457005	0.00171377	Enriched	Enriched
P40261	Nicotinamide N-methyltransferase [OS=Homo sapiens]	13.0326	1	3.59938	1.33752	0.717	2.57116	0.00460012	0.0426338	Enriched	Rejected
P52565-1	rho GDP-dissociation inhibitor 1 [OS=Homo sapiens]	5.65468	1	3.21743	0.841723	0.4	3.41578	0.00463019	0.0619062	Enriched	Rejected
Q96PK6-1	RNA-binding protein 14 [OS=Homo sapiens]	9.52615	1	3.64448	1.21757	0.725	1.82252	0.00466025	0.0420024	Enriched	Rejected
P31942	Heterogeneous nuclear ribonucleoprotein H3 [OS=Homo sapiens]	12.6204	1	2.79872	2.51627	0.985	2.12465	0.00469032	0.01365	Enriched	Rejected
P51572-2	Isoform 2 of B-cell receptor-associated protein 31 [OS=Homo sapiens]	6.76371	1	2.51556	1.36286	0.816	1.8429	0.00472038	0.0352977	Enriched	Rejected
P62241	40S ribosomal protein S8 [OS=Homo sapiens]	4.64524	1	2.04888	0.121636	0.008	6.69685	0.00475045	0.0853277	Enriched	Rejected
Q15436	protein transport protein Sec23A [OS=Homo sapiens]	10.0209	1	2.12205	0.367802	0.02	2.60973	0.00478052	0.0840349	Enriched	Rejected
Q9BUJ2-1	Heterogeneous nuclear ribonucleoprotein U-like protein 1 [OS=Homo sapiens]	2.6233	1	1.95128	0.62958	0.296	3.66903	0.00481058	0.0666566	Enriched	Rejected
P32322-3	Isoform 3 of Pyrroline-5-carboxylate reductase 1, mitochondrial [OS=Homo sapiens]	10.0503	1	2.76123	3.20323	0.621	11.7378	0.00484065	0.0484666	Enriched	Rejected
Q12888-2	Isoform 2 of TP53-binding protein 1 [OS=Homo sapiens]	3.3507	1	1.87435	4.49093	1	2.09604	0.00487072	0.00174384	Enriched	Enriched
P49589-3	Isoform 3 of Cysteine--tRNA ligase, cytoplasmic [OS=Homo sapiens]	4.28849	1	2.37957	3.63836	0.947	3.89813	0.00490078	0.0217679	Enriched	Rejected
Q9Y5K6	CD2-associated protein [OS=Homo sapiens]	2.78474	1	1.79516	2.7197	1	1.61915	0.00493085	0.0017739	Enriched	Enriched
P25398	40S ribosomal protein S12 [OS=Homo sapiens]	3.01084	1	1.97189	0.444494	0.06	2.31947	0.00496091	0.0806374	Enriched	Rejected
Q14444-1	Caprin-1 [OS=Homo sapiens]	3.16483	1	1.81494	3.20877	0.993	2.06835	0.00499098	0.010463	Enriched	Enriched
Q9NVA2-2	Isoform 2 of Septin-11 [OS=Homo sapiens]	5.20469	1	2.06885	1.90267	0.796	3.48847	0.00502105	0.0372219	Enriched	Rejected
Q9Y4W6	AFG3-like protein 2 [OS=Homo sapiens]	3.32463	1	1.90532	957.731	1	5.16107	0.00505111	0.00180397	Enriched	Enriched
P55036-1	26S proteasome non-ATPase regulatory subunit 4 [OS=Homo sapiens]	4.68393	1	2.01937	13.6	0.998	3.08606	0.00508118	0.00649429	Enriched	Enriched
P49959-3	Isoform 3 of Double-strand break repair protein MRE11 [OS=Homo sapiens]	2.3745	1	1.57126	1.08292	0.64	1.48491	0.00511124	0.0474744	Enriched	Rejected
Q13185	chromobox protein homolog 3 [OS=Homo sapiens]	34.3073	1	5.15315	7.29137	0.988	4.68436	0.00514131	0.0125376	Enriched	Enriched
P28066-1	Proteasome subunit alpha type-5 [OS=Homo sapiens]	2.94717	1	1.86773	3.37973	0.998	2.14639	0.00517138	0.00652435	Enriched	Enriched
Q14258	E3 ubiquitin/ISG15 ligase TRIM25 [OS=Homo sapiens]	10.7432	1	2.47867	0.993625	0.494	2.65728	0.00520144	0.0564943	Enriched	Rejected
Q5QNW6-2	Isoform 2 of Histone H2B type 2-F [OS=Homo sapiens]	2.07743	1	1.52638	3.71844	0.74	5.03445	0.00523151	0.0412808	Enriched	Rejected
P62753	40S RIBOSOMAL PROTEIN S6 [OS=Homo sapiens]	3.96124	1	2.09702	3.25096	1	1.92343	0.00526158	0.00183403	Enriched	Enriched
Q08554-1	Desmocollin-1 [OS=Homo sapiens]	3.01705	1	1.91465	0.786937	0.158	1.47676	0.00529164	0.0742032	Enriched	Rejected
P25787	Proteasome subunit alpha type-2 [OS=Homo sapiens]	2.52261	1	1.78846	39.8676	1	6.8776	0.00532171	0.0018641	Enriched	Enriched
O14744	Protein arginine N-methyltransferase 5 [OS=Homo sapiens]	6.57072	1	1.92359	4.51506	0.715	11.9721	0.00535177	0.0427841	Enriched	Rejected
P62280	40S ribosomal protein S11 [OS=Homo sapiens]	4.01365	1	2.38759	71.9709	1	4.31969	0.00538184	0.00189417	Enriched	Enriched
Q9NQC3-2	Isoform 2 of Reticulon-4 [OS=Homo sapiens]	2.22033	1	1.58473	1.58539	0.927	1.69706	0.00541191	0.0248046	Enriched	Rejected
Q9Y6M1	Insulin-like growth factor 2 mRNA-binding protein 2 [OS=Homo sapiens]	2.49623	1	1.56902	2.34505	0.98	2.05345	0.00544197	0.0152435	Enriched	Rejected
P39748	Flap endonuclease 1 [OS=Homo sapiens]	2.53327	1	1.75533	1.52817	0.924	1.64069	0.00547204	0.0253157	Enriched	Rejected
Q00325-2	Isoform B of Phosphate carrier protein, mitochondrial [OS=Homo sapiens]	10.9622	1	5.10592	5.89219	0.964	4.96406	0.0055021	0.0185809	Enriched	Rejected
Q01995	transgelin [OS=Homo sapiens]	3.99373	1	2.00764	7.89705	1	2.71801	0.00553217	0.00192423	Enriched	Enriched
Q15003	Condensin complex subunit 2 [OS=Homo sapiens]	4.95947	1	2.03097	9.71632	0.997	4.08449	0.00556224	0.00757667	Enriched	Enriched
Q7LG56-6	Isoform 6 of Ribonucleoside-diphosphate reductase subunit M2 B [OS=Homo sapiens]	4.66178	1	2.10632	3.40204	0.999	1.91331	0.0055923	0.00538184	Enriched	Enriched
Q9Y6C9	Mitochondrial carrier homolog 2 [OS=Homo sapiens]	3.08039	1	1.90199	1.17811	0.618	2.14871	0.00562237	0.048617	Enriched	Rejected
O75821	Eukaryotic translation initiation factor 3 subunit G [OS=Homo sapiens]	2.88011	1	2.08963	7.12298	1	2.90244	0.00565244	0.0019543	Enriched	Enriched
P62081	40S ribosomal protein S7 [OS=Homo sapiens]	11.4612	1	2.56012	5.35179	1	2.51533	0.0056825	0.00198437	Enriched	Enriched
P62888	60S ribosomal protein L30 [OS=Homo sapiens]	3.55709	1	1.84018	1.08613	0.557	2.23815	0.00571257	0.0524354	Enriched	Rejected
P09382	Galectin-1 [OS=Homo sapiens]	3.5003	1	1.83257	2.51967	0.947	2.57696	0.00574263	0.021798	Enriched	Rejected
Q96C19	EF-hand domain-containing protein D2 [OS=Homo sapiens]	2.42557	1	1.72675	1.54824	0.91	1.71122	0.0057727	0.02727	Enriched	Rejected
P63000-2	Isoform B of Ras-related C3 botulinum toxin substrate 1 [OS=Homo sapiens]	2.07243	1	1.45113	1.28376	0.631	2.20927	0.00580277	0.047715	Enriched	Rejected
P09622	Dihydrolipoyl dehydrogenase, mitochondrial [OS=Homo sapiens]	3.18638	1	2.0277	0.266063	0.046	3.67867	0.00583283	0.08181	Enriched	Rejected
P05089	Arginase-1 [OS=Homo sapiens]	3.04346	1	1.79884	1.98441	0.981	1.80293	0.0058629	0.0149128	Enriched	Rejected
Q5SSJ5-1	Heterochromatin protein 1-binding protein 3 [OS=Homo sapiens]	1.91964	1	1.47597	1.59474	0.74	2.46516	0.00589296	0.0413109	Enriched	Rejected
Q8WWM7-3	Isoform 3 of Ataxin-2-like protein [OS=Homo sapiens]	4.13487	1	2.32128	5.36382	0.995	2.9638	0.00592303	0.00938064	Enriched	Enriched
P54727	UV excision repair protein RAD23 homolog B [OS=Homo sapiens]	3.36142	1	1.73234	2.11269	0.942	2.1581	0.0059531	0.0223091	Enriched	Rejected
Q08188	Protein-glutamine gamma-glutamyltransferase E [OS=Homo sapiens]	2.65924	1	1.79323	2.16182	0.993	1.57809	0.00598316	0.0104931	Enriched	Enriched
Q93009	Ubiquitin carboxyl-terminal hydrolase 7 [OS=Homo sapiens]	3.78603	1	2.13254	4.72196	0.997	3.6515	0.00601323	0.00760673	Enriched	Enriched
P60953	Cell division control protein 42 homolog [OS=Homo sapiens]	5.35951	1	2.09278	16.338	1	3.9508	0.0060433	0.00201443	Enriched	Enriched
Q6FI13	Histone H2A type 2-A [OS=Homo sapiens]	14.1815	1	2.66623	1.03862	0.558	3.82906	0.00607336	0.0523452	Enriched	Rejected
E9PAV3	Nascent polypeptide-associated complex subunit alpha, muscle-specific form [OS=Homo sapiens]	4.23664	1	1.96346	5.47585	1	2.38987	0.00610343	0.0020445	Enriched	Enriched
O00541-1	Pescadillo homolog [OS=Homo sapiens]	4.1055	1	1.97823	15.5757	1	6.03688	0.00613349	0.00207456	Enriched	Enriched
O60684	Importin subunit alpha-7 [OS=Homo sapiens]	3.41317	1	1.85723	0.248787	0.223	5.59879	0.00616356	0.0702646	Enriched	Rejected
Q05193-1	Dynamin-1 [OS=Homo sapiens]	3.76607	1	3.0757	1.67348	0.759	2.51065	0.00619363	0.0400481	Enriched	Rejected
Q9UHD9	Ubiquilin-2 [OS=Homo sapiens]	6.22685	1	4.40528	7.7298	0.83	9.0022	0.00622369	0.034095	Enriched	Rejected
P43487	Ran-specific GTPase-activating protein [OS=Homo sapiens]	2.93356	1	1.56626	2.96862	0.992	2.11383	0.00625376	0.0110042	Enriched	Enriched
O75396	Vesicle-trafficking protein SEC22b [OS=Homo sapiens]	4.1651	1	2.19247	1.76134	0.773	2.92204	0.00628382	0.0390259	Enriched	Rejected
P49753-1	Acyl-coenzyme A thioesterase 2, mitochondrial [OS=Homo sapiens]	5.61488	1	2.28641	1.26476	0.514	5.2981	0.00631389	0.054991	Enriched	Rejected
Q14498-1	RNA-binding protein 39 [OS=Homo sapiens]	2.56853	1	1.78288	0.65732	0.404	3.35673	0.00634396	0.0616657	Enriched	Rejected
P10768	S-formylglutathione hydrolase [OS=Homo sapiens]	4.48661	1	1.93886	7.68693	0.776	13.9877	0.00637402	0.0386049	Enriched	Rejected
P49721	proteasome subunit beta type-2 [OS=Homo sapiens]	9.11433	1	2.72825	1.55917	0.698	4.17106	0.00640409	0.0438966	Enriched	Rejected
P50479-1	PDZ and LIM domain protein 4 [OS=Homo sapiens]	2.34823	1	1.45523	1.95173	0.998	1.59635	0.00643416	0.00655442	Enriched	Enriched
Q99436	Proteasome subunit beta type-7 [OS=Homo sapiens]	3.31951	1	1.77004	1.65407	0.835	2.19329	0.00646422	0.0336741	Enriched	Rejected
Q02543	60S ribosomal protein L18a [OS=Homo sapiens]	4.85912	1	2.85756	5.1872	1	2.15967	0.00649429	0.00210463	Enriched	Enriched
Q9C0C2	182 kDa tankyrase-1-binding protein [OS=Homo sapiens]	5.60267	1	2.18511	0.822317	0.444	3.80838	0.00652435	0.0595911	Enriched	Rejected
P22676	Calretinin [OS=Homo sapiens]	4.07756	1	2.53236	0.353438	0.261	6.32926	0.00655442	0.0684907	Enriched	Rejected
Q16204	coiled-coil domain-containing protein 6 [OS=Homo sapiens]	2.80635	1	1.71154	0.796172	0.344	2.47524	0.00658449	0.0642514	Enriched	Rejected
P53999	Activated RNA polymerase II transcriptional coactivator p15 [OS=Homo sapiens]	1.97773	1	1.49782	0.889504	0.389	10.4645	0.00661455	0.0625075	Enriched	Rejected
P62244	40S ribosomal protein S15a [OS=Homo sapiens]	5.4905	1	2.60789	4.08321	0.91	5.59102	0.00664462	0.0273001	Enriched	Rejected
P0C0S5	Histone H2A.Z [OS=Homo sapiens]	14.6785	1	2.88115	3.16586	0.964	3.11317	0.00667468	0.0186109	Enriched	Rejected
O43847-2	Isoform 2 of Nardilysin [OS=Homo sapiens]	2.49782	1	1.78227	0.514546	0.214	2.70853	0.00670475	0.0709862	Enriched	Rejected
Q15637-5	Isoform 5 of Splicing factor 1 [OS=Homo sapiens]	3.99484	1	2.16433	2.59138	0.988	2.24636	0.00673482	0.0125676	Enriched	Enriched
Q9Y2Z0-1	Protein SGT1 homolog [OS=Homo sapiens]	9.92571	1	3.08889	5.55396	0.969	5.00871	0.00676488	0.017739	Enriched	Rejected
P15586	N-acetylglucosamine-6-sulfatase [OS=Homo sapiens]	96.4148	1	8.01845	0.769949	0.168	1.57559	0.00679495	0.073632	Enriched	Rejected
P46926	glucosamine-6-phosphate isomerase 1 [OS=Homo sapiens]	4.15713	1	2.38961	0.0785307	0.081	19.0511	0.00682502	0.0791642	Enriched	Rejected
Q9H307	Pinin [OS=Homo sapiens]	2.45498	1	1.55801	2.85965	1	1.72254	0.00685508	0.0021347	Enriched	Enriched
P49023	Paxillin [OS=Homo sapiens]	2.65116	1	1.75504	3.86537	1	1.94286	0.00688515	0.00216476	Enriched	Enriched
P46783	40S ribosomal protein S10 [OS=Homo sapiens]	4.70862	1	2.03235	3.9932	0.933	4.29947	0.00691521	0.0238725	Enriched	Rejected
P55010	Eukaryotic translation initiation factor 5 [OS=Homo sapiens]	2.57393	1	1.76236	1.81976	0.986	1.58029	0.00694528	0.0132291	Enriched	Rejected
Q15738	sterol-4-alpha-carboxylate 3-dehydrogenase, decarboxylating [OS=Homo sapiens]	81.5112	1	6.62317	0.217675	0.159	6.46977	0.00697535	0.074113	Enriched	Rejected
O95816	BAG family molecular chaperone regulator 2 [OS=Homo sapiens]	24.147	1	4.35306	14.3838	1	6.04733	0.00700541	0.00219483	Enriched	Enriched
P83731	60S ribosomal protein L24 [OS=Homo sapiens]	2.56027	1	1.56772	3.23803	0.993	2.04703	0.00703548	0.0105232	Enriched	Enriched
O14964	Hepatocyte growth factor-regulated tyrosine kinase substrate [OS=Homo sapiens]	6.89247	1	2.59979	2.73069	0.984	2.18382	0.00706554	0.0140409	Enriched	Rejected
P62910	60S ribosomal protein L32 [OS=Homo sapiens]	3.03449	1	1.83924	3.30236	0.961	2.99677	0.00709561	0.0191822	Enriched	Rejected
P46776	60S ribosomal protein L27a [OS=Homo sapiens]	2.06704	1	1.52292	1.65143	0.618	3.25281	0.00712568	0.048647	Enriched	Rejected
Q9UHR5-1	SAP30-binding protein [OS=Homo sapiens]	2.41399	1	1.60423	2.38217	0.999	1.63189	0.00715574	0.00541191	Enriched	Enriched
P62266	40S ribosomal protein S23 [OS=Homo sapiens]	3.13562	1	1.96089	0.671087	0.398	7.11947	0.00718581	0.0619964	Enriched	Rejected
P61026	ras-related protein rab-10 [OS=Homo sapiens]	4.00421	1	1.93552	1.28094	0.752	1.86285	0.00721587	0.0405893	Enriched	Rejected
P40429	60S ribosomal protein L13a [OS=Homo sapiens]	2.98899	1	1.70688	17.8377	0.924	18.5097	0.00724594	0.0253458	Enriched	Rejected
P29317	Ephrin type-A receptor 2 [OS=Homo sapiens]	4.88574	1	2.43719	6.34688	0.998	2.26882	0.00727601	0.00658449	Enriched	Enriched
P32119	Peroxiredoxin-2 [OS=Homo sapiens]	3.04456	1	1.93692	0.753332	0.295	2.60901	0.00730607	0.066807	Enriched	Rejected
Q13557-11	Isoform Delta 11 of Calcium/calmodulin-dependent protein kinase type II subunit delta [OS=Homo sapiens]	3.47241	1	2.02302	0.727945	0.076	1.43195	0.00733614	0.079525	Enriched	Rejected
Q9Y5B8	Nucleoside diphosphate kinase 7 [OS=Homo sapiens]	3.09921	1	1.94343	1.82888	0.787	2.94395	0.00736621	0.0377931	Enriched	Rejected
P36543	V-type proton ATPase subunit E 1 [OS=Homo sapiens]	2.15996	1	1.6196	0.262046	0.016	2.59677	0.00739627	0.0842754	Enriched	Rejected
O75832	26S proteasome non-ATPase regulatory subunit 10 [OS=Homo sapiens]	1.5367	1	1.28406	0.258892	0.043	3.50625	0.00742634	0.0820806	Enriched	Rejected
P60866-2	Isoform 2 of 40S ribosomal protein S20 [OS=Homo sapiens]	6.03031	1	2.60748	4.32021	1	2.23947	0.0074564	0.00222489	Enriched	Enriched
P16104	Histone H2AX [OS=Homo sapiens]	5.77131	1	2.53575	3.09412	0.984	2.53113	0.00748647	0.014071	Enriched	Rejected
P35611-3	Isoform 3 of Alpha-adducin [OS=Homo sapiens]	1.9324	1	1.53831	0.986925	0.451	2.04996	0.00751654	0.0592904	Enriched	Rejected
Q658Y4	Protein FAM91A1 [OS=Homo sapiens]	13.3296	1	5.01545	2.62673	0.979	2.16868	0.0075466	0.0157246	Enriched	Rejected
Q9P287-2	Isoform 2 of BRCA2 and CDKN1A-interacting protein [OS=Homo sapiens]	4.50686	1	1.98775	10.5244	1	2.92822	0.00757667	0.00225496	Enriched	Enriched
Q16527	Cysteine and glycine-rich protein 2 [OS=Homo sapiens]	6.75703	1	2.45843	0.700883	0.278	2.39275	0.00760673	0.0675887	Enriched	Rejected
P42677	40S ribosomal protein S27 [OS=Homo sapiens]	3.61619	1	1.97034	0.511957	0.188	2.96729	0.0076368	0.0723692	Enriched	Rejected
P62854	40S ribosomal protein S26 [OS=Homo sapiens]	10.816	1	2.57629	3.96295	0.799	8.32497	0.00766687	0.0370114	Enriched	Rejected
Q8WW12	PEST proteolytic signal-containing nuclear protein [OS=Homo sapiens]	2.06126	1	1.52661	1.4263	0.803	2.06976	0.00769693	0.0366206	Enriched	Rejected
Q9NXF1	Testis-expressed protein 10 [OS=Homo sapiens]	4.14223	1	2.04523	0.572877	0.195	1.98888	0.007727	0.0721888	Enriched	Rejected
P05090	apolipoprotein D [OS=Homo sapiens]	2.90951	1	1.75173	2.20543	0.98	2.07774	0.00775707	0.0152736	Enriched	Rejected
P11172	uridine 5'-monophosphate synthase [OS=Homo sapiens]	3.88142	1	2.07241	0.569753	0.248	3.30674	0.00778713	0.069092	Enriched	Rejected
Q92879-4	Isoform 4 of CUGBP Elav-like family member 1 [OS=Homo sapiens]	2.526	1	1.67213	1.10807	0.624	1.66655	0.0078172	0.048196	Enriched	Rejected
P98175-1	RNA-binding protein 10 [OS=Homo sapiens]	27.6482	1	20.9773	0.637855	0.332	2.36273	0.00784726	0.0647925	Enriched	Rejected
Q9HC35	Echinoderm microtubule-associated protein-like 4 [OS=Homo sapiens]	84.0793	1	5.17306	0.384087	0.057	2.71357	0.00787733	0.0810583	Enriched	Rejected
P30042-1	ES1 protein homolog, mitochondrial [OS=Homo sapiens]	3.37803	1	1.93386	0.530491	0.1	2.40259	0.0079074	0.0775406	Enriched	Rejected
P62899-2	Isoform 2 of 60S ribosomal protein L31 [OS=Homo sapiens]	2.88044	1	1.62936	338.457	1	109.546	0.00793746	0.00228503	Enriched	Enriched
Q92820	Gamma-glutamyl hydrolase [OS=Homo sapiens]	3.51241	1	1.96522	2.38052	0.979	2.01193	0.00796753	0.0157547	Enriched	Rejected
Q9NR12-1	PDZ and LIM domain protein 7 [OS=Homo sapiens]	6.45915	1	3.57537	0.722053	0.363	3.72075	0.00799759	0.0638004	Enriched	Rejected
Q9Y5X2	Sorting nexin-8 [OS=Homo sapiens]	11.2603	1	5.1885	0.417519	0.169	3.56732	0.00802766	0.0735418	Enriched	Rejected
O15498	Synaptobrevin homolog YKT6 [OS=Homo sapiens]	2.79399	1	1.63013	0.929599	0.471	2.81768	0.00805773	0.0582081	Enriched	Rejected
Q99426	tubulin-folding cofactor B [OS=Homo sapiens]	4.33495	1	2.03412	2.80764	0.987	2.34687	0.00808779	0.0128683	Enriched	Rejected
Q9NZ45	CDGSH iron-sulfur domain-containing protein 1 [OS=Homo sapiens]	5.26642	1	2.22091	0.625546	0.435	4.24394	0.00811786	0.0601323	Enriched	Rejected
P84090	Enhancer of rudimentary homolog [OS=Homo sapiens]	8.02521	1	2.40023	3.07265	0.962	2.76771	0.00814793	0.019092	Enriched	Rejected
Q9BRX2	Protein pelota homolog [OS=Homo sapiens]	2.32498	1	1.61011	1.23089	0.623	1.91907	0.00817799	0.0482562	Enriched	Rejected
Q9NZC7	WW domain-containing oxidoreductase [OS=Homo sapiens]	2.19766	1	1.58896	1.29994	0.807	1.60736	0.00820806	0.0361696	Enriched	Rejected
Q9BR76	Coronin-1B [OS=Homo sapiens]	2.17403	1	1.53074	1.58112	0.834	1.9733	0.00823812	0.0337943	Enriched	Rejected
O94842	TOX high mobility group box family member 4 [OS=Homo sapiens]	4.73982	1	2.09132	0.665257	0.143	1.77962	0.00826819	0.075015	Enriched	Rejected
P61020	Ras-related protein Rab-5B [OS=Homo sapiens]	2.5369	1	1.88225	0.380549	0.11	3.51314	0.00829826	0.0768791	Enriched	Rejected
Q9UBU9-1	nuclear RNA export factor 1 [OS=Homo sapiens]	3.04181	1	1.85296	0.40345	0.484	6.97949	0.00832832	0.057276	Enriched	Rejected
P13591-2	Neural cell adhesion molecule 1 [OS=Homo sapiens]	18.2035	1	6.11496	0.375178	0.06	2.68913	0.00835839	0.0806675	Enriched	Rejected
Q8WYP5-2	Isoform 2 of Protein ELYS [OS=Homo sapiens]	6.13766	1	2.53554	9.85432	0.997	3.23096	0.00838845	0.0076368	Enriched	Enriched
O15479	Melanoma-associated antigen B2 [OS=Homo sapiens]	3.5702	1	1.96886	2.03087	0.717	3.35769	0.00841852	0.0426639	Enriched	Rejected
O60216	Double-strand-break repair protein rad21 homolog [OS=Homo sapiens]	9.45444	1	3.79453	4.10455	0.99	2.72986	0.00844859	0.0117859	Enriched	Enriched
Q9P035	Very-long-chain (3R)-3-hydroxyacyl-CoA dehydratase 3 [OS=Homo sapiens]	8.0946	1	2.86823	1.8697	0.815	2.391	0.00847865	0.0353578	Enriched	Rejected
Q9NX40	OCIA domain-containing protein 1 [OS=Homo sapiens]	4.15433	1	2.56261	0.492608	0.138	3.08084	0.00850872	0.0753458	Enriched	Rejected
Q9NR28-1	Diablo homolog, mitochondrial [OS=Homo sapiens]	10.822	1	2.9514	0.97845	0.503	2.53777	0.00853879	0.0557126	Enriched	Rejected
O15347	High mobility group protein B3 [OS=Homo sapiens]	4.05661	1	3.51865	26.1284	0.912	26.6794	0.00856885	0.0271197	Enriched	Rejected
P14927	Cytochrome b-c1 complex subunit 7 [OS=Homo sapiens]	21.9042	1	3.70402	3.37775	0.927	3.66634	0.00859892	0.0248346	Enriched	Rejected
P82650	28S ribosomal protein S22, mitochondrial [OS=Homo sapiens]	4.39811	1	2.10085	0.455372	0.046	2.23097	0.00862898	0.08184	Enriched	Rejected
Q92917	G patch domain and KOW motifs-containing protein [OS=Homo sapiens]	3.59388	1	1.87997	2.1859	0.984	1.84449	0.00865905	0.014101	Enriched	Rejected
P09661	U2 small nuclear ribonucleoprotein A' [OS=Homo sapiens]	13.4886	1	3.65265	0.364847	0.14	4.73841	0.00868912	0.0752255	Enriched	Rejected
O95861-2	Isoform 2 of 3'(2'),5'-bisphosphate nucleotidase 1 [OS=Homo sapiens]	4.31468	1	2.09176	1.55592	0.649	3.23738	0.00871918	0.0469032	Enriched	Rejected
Q9H6Z4	Ran-binding protein 3 [OS=Homo sapiens]	4.52503	1	1.89507	13.7364	0.964	12.8827	0.00874925	0.018641	Enriched	Rejected
P50750-2	Isoform 2 of Cyclin-dependent kinase 9 [OS=Homo sapiens]	1.50583	1	1.32343	0.554971	0.137	2.17851	0.00877931	0.075436	Enriched	Rejected
Q9Y3B4	Splicing factor 3B subunit 6 [OS=Homo sapiens]	6.67394	1	2.64611	20.0932	0.942	20.32	0.00880938	0.0223391	Enriched	Rejected
P62913	60S ribosomal protein L11 [OS=Homo sapiens]	5.61338	1	2.64473	1.00067	0.509	1.64833	0.00883945	0.0552616	Enriched	Rejected
P07305	Histone H1.0 [OS=Homo sapiens]	3.70307	1	2.2356	4.74991	0.999	2.52988	0.00886951	0.00544197	Enriched	Enriched
Q15257-1	Serine/threonine-protein phosphatase 2A activator [OS=Homo sapiens]	4.98499	1	2.10076	3.27405	1	2.309	0.00889958	0.00231509	Enriched	Enriched
P25686-3	DnaJ homolog subfamily B member 2 [OS=Homo sapiens]	3.68967	1	2.21207	1.74595	0.907	1.9994	0.00892965	0.0276609	Enriched	Rejected
Q9UK76-2	Isoform 2 of Jupiter microtubule associated homolog 1 [OS=Homo sapiens]	9.74892	1	5.12789	1.58353	0.614	2.49356	0.00895971	0.0490379	Enriched	Rejected
Q96QA5	gasdermin-A [OS=Homo sapiens]	3.33396	1	1.85004	1.20912	0.591	2.39882	0.00898978	0.0503007	Enriched	Rejected
Q16186	Proteasomal ubiquitin receptor ADRM1 [OS=Homo sapiens]	9.68509	1	2.32455	18.699	1	3.09162	0.00901984	0.00234516	Enriched	Enriched
Q99755	Phosphatidylinositol 4-phosphate 5-kinase type-1 alpha [OS=Homo sapiens]	23.671	1	2.1002	4.04844	0.776	5.98739	0.00904991	0.038635	Enriched	Rejected
Q96HS1-1	Serine/threonine-protein phosphatase Pgam5, mitochondrial [OS=Homo sapiens]	5.67261	1	2.54872	1.32168	0.739	2.08305	0.00907998	0.041341	Enriched	Rejected
Q8N0X7	Spartin [OS=Homo sapiens]	10.9278	1	2.12286	2.92646	1	1.95857	0.00911004	0.00237523	Enriched	Enriched
P20810-6	Isoform 6 of Calpastatin [OS=Homo sapiens]	4.4108	1	3.15609	0.80409	0.287	1.87136	0.00914011	0.067258	Enriched	Rejected
P62851	40S ribosomal protein S25 [OS=Homo sapiens]	3.82551	1	2.18031	11.2163	0.992	5.09205	0.00917017	0.0110343	Enriched	Enriched
P60903	Protein S100-A10 [OS=Homo sapiens]	4.60427	1	2.22975	1.50955	0.919	1.66246	0.00920024	0.0263379	Enriched	Rejected
P48509	CD151 antigen [OS=Homo sapiens]	7.93417	1	2.84719	5.35175	0.999	3.00408	0.00923031	0.00547204	Enriched	Enriched
Q96A33-1	Coiled-coil domain-containing protein 47 [OS=Homo sapiens]	10.9932	1	2.95629	0.194905	0.087	6.45411	0.00926037	0.078623	Enriched	Rejected
Q9NX24	H/ACA ribonucleoprotein complex subunit 2 [OS=Homo sapiens]	14.6839	1	2.45431	0.633246	0.334	6.48821	0.00929044	0.0647625	Enriched	Rejected
Q14126	Desmoglein-2 [OS=Homo sapiens]	2.56751	1	1.64884	4.71635	1	1.87137	0.00932051	0.00240529	Enriched	Enriched
O15226-2	Isoform 2 of NF-kappa-B-repressing factor [OS=Homo sapiens]	7.91004	1	4.96863	20.8975	1	3.68277	0.00935057	0.00243536	Enriched	Enriched
P46108-1	Adapter molecule crk [OS=Homo sapiens]	2.74877	1	1.69501	1.68165	0.854	2.18945	0.00938064	0.0325015	Enriched	Rejected
Q9BUQ8	Probable ATP-dependent RNA helicase DDX23 [OS=Homo sapiens]	4.34314	1	3.66876	4.49429	0.923	5.2812	0.0094107	0.0256464	Enriched	Rejected
O60231	Putative pre-mRNA-splicing factor ATP-dependent RNA helicase DHX16 [OS=Homo sapiens]	6.50534	1	2.8311	2.44651	0.914	2.682	0.00944077	0.026819	Enriched	Rejected
Q9ULA0	Aspartyl aminopeptidase [OS=Homo sapiens]	4.1375	1	1.88248	1.70431	0.911	1.96426	0.00947084	0.0272099	Enriched	Rejected
Q8NF91	Nesprin-1 [OS=Homo sapiens]	3.12935	1	1.94143	0.0325476	0.003	4.41088	0.0095009	0.0857787	Enriched	Rejected
P50402	Emerin [OS=Homo sapiens]	5.74769	1	3.42629	2.02678	0.987	1.61097	0.00953097	0.0128984	Enriched	Rejected
Q9H832	Ubiquitin-conjugating enzyme E2 Z [OS=Homo sapiens]	26.8242	1	2.73579	72.822	1	3.08314	0.00956103	0.00246542	Enriched	Enriched
P18077	60S ribosomal protein L35a [OS=Homo sapiens]	3.15102	1	1.93524	1.36598	0.615	3.6187	0.0095911	0.0489176	Enriched	Rejected
Q9UBM7	7-dehydrocholesterol reductase [OS=Homo sapiens]	3.12139	1	1.98064	0.388306	0.11	3.1375	0.00962117	0.0769092	Enriched	Rejected
Q9UIF9-1	Bromodomain adjacent to zinc finger domain protein 2A [OS=Homo sapiens]	6.32983	1	2.58501	2.50348	0.936	2.60048	0.00965123	0.0233614	Enriched	Rejected
Q5JSZ5-1	Protein PRRC2B [OS=Homo sapiens]	4.18672	1	2.20315	1.21372	0.599	3.91675	0.0096813	0.0498797	Enriched	Rejected
P41236	Protein phosphatase inhibitor 2 [OS=Homo sapiens]	5.13845	1	2.10084	4.12598	1	2.3445	0.00971137	0.00249549	Enriched	Enriched
Q5T8P6	RNA-binding protein 26 [OS=Homo sapiens]	4.17098	1	2.11528	5.28152	0.996	2.72249	0.00974143	0.00862898	Enriched	Enriched
O60493-1	sorting nexin-3 [OS=Homo sapiens]	7.65229	1	2.41945	8.72986	1	6.24447	0.0097715	0.00252556	Enriched	Enriched
Q03518	Antigen peptide transporter 1 [OS=Homo sapiens]	3.96823	1	2.20058	0.39887	0.095	2.62513	0.00980156	0.0780517	Enriched	Rejected
Q96NL8	protein C8orf37 [OS=Homo sapiens]	1.94021	1	1.47288	0.834355	0.28	1.576	0.00983163	0.0674684	Enriched	Rejected
P42696	RNA-binding protein 34 [OS=Homo sapiens]	4.52828	1	2.28048	0.640239	0.125	1.89374	0.0098617	0.0760974	Enriched	Rejected
Q8N357	Solute carrier family 35 member F6 [OS=Homo sapiens]	4.43278	1	2.5546	1.07529	0.63	1.42007	0.00989176	0.0478954	Enriched	Rejected
Q9H7C9-1	Mth938 domain-containing protein [OS=Homo sapiens]	2.6724	1	1.64806	1.05453	0.564	1.53907	0.00992183	0.0520746	Enriched	Rejected
Q9Y5J1	U3 small nucleolar RNA-associated protein 18 homolog [OS=Homo sapiens]	2.46906	1	1.63108	6.44173	1	3.72193	0.00995189	0.00255562	Enriched	Enriched
Q7Z569	BRCA1-associated protein [OS=Homo sapiens]	5.86066	1	2.25963	11.9223	1	2.2574	0.00998196	0.00258569	Enriched	Enriched
P61956	small ubiquitin-related modifier 2 [OS=Homo sapiens]	5.63621	1	2.3261	0.907459	0.49	3.65854	0.010012	0.056825	Enriched	Rejected
Q969T9	WW domain-binding protein 2 [OS=Homo sapiens]	27.4159	1	2.77633	2.68609	0.984	2.05806	0.0100421	0.0141311	Enriched	Rejected
P81605-2	Isoform 2 of Dermcidin [OS=Homo sapiens]	3.77347	1	1.93678	1.44715	0.925	1.54086	0.0100722	0.0250752	Enriched	Rejected
Q02818	Nucleobindin-1 [OS=Homo sapiens]	3.12964	1	1.84914	0.422839	0.015	1.84397	0.0101022	0.0843656	Enriched	Rejected
Q15517	corneodesmosin [OS=Homo sapiens]	3.85824	1	1.93497	1.87823	0.988	1.58618	0.0101323	0.0125977	Enriched	Enriched
Q8IVM0-2	Isoform 2 of Coiled-coil domain-containing protein 50 [OS=Homo sapiens]	9.09312	1	2.31849	7.45425	0.997	4.89635	0.0101624	0.00766687	Enriched	Enriched
Q9H9A6	Leucine-rich repeat-containing protein 40 [OS=Homo sapiens]	7.24154	1	2.95637	0.544543	0.366	4.72462	0.0101924	0.06362	Enriched	Rejected
Q8TDM6-1	disks large homolog 5 [OS=Homo sapiens]	4.37635	1	1.99469	4.62454	0.997	2.39301	0.0102225	0.00769693	Enriched	Enriched
Q9P2I0	Cleavage and polyadenylation specificity factor subunit 2 [OS=Homo sapiens]	3.77195	1	1.96787	0.897083	0.374	1.4725	0.0102526	0.0631088	Enriched	Rejected
Q86X76-3	Isoform 4 of Nitrilase homolog 1 [OS=Homo sapiens]	2.5627	1	2.1323	0.623746	0.105	1.77872	0.0102826	0.07727	Enriched	Rejected
Q15018	BRISC complex subunit Abraxas 2 [OS=Homo sapiens]	9.9502	1	2.60237	1.06622	0.632	1.36558	0.0103127	0.0476849	Enriched	Rejected
Q96TA2-1	ATP-dependent zinc metalloprotease YME1L1 [OS=Homo sapiens]	2.83965	1	1.78978	0.0744653	0.031	12.4518	0.0103428	0.0832832	Enriched	Rejected
Q9Y6Y8	SEC23-interacting protein [OS=Homo sapiens]	7.50621	1	2.95868	0.0447136	0.157	25.7221	0.0103728	0.0742634	Enriched	Rejected
Q05519	serine/arginine-rich splicing factor 11 [OS=Homo sapiens]	8.94946	1	4.38793	0.553717	0.179	2.12629	0.0104029	0.0731209	Enriched	Rejected
P52630-3	signal transducer and activator of transcription 2 [OS=Homo sapiens]	7.20072	1	2.91157	3.74395	0.974	3.29169	0.010433	0.0169272	Enriched	Rejected
P04424	argininosuccinate lyase [OS=Homo sapiens]	7.20699	1	4.33091	1.54149	0.805	2.3085	0.010463	0.03638	Enriched	Rejected
P54252	Ataxin-3 [OS=Homo sapiens]	6.49773	1	2.35356	7.42422	0.999	3.2631	0.0104931	0.0055021	Enriched	Enriched
Q9H6J7-2	Isoform 2 of UPF0705 protein C11orf49 [OS=Homo sapiens]	1.95848	1	1.45425	2.73463	0.982	2.21757	0.0105232	0.0144919	Enriched	Rejected
P60468	protein transport protein Sec61 subunit beta [OS=Homo sapiens]	8.43409	1	4.65586	3.02568	0.908	3.58461	0.0105532	0.0275707	Enriched	Rejected
P57052	Splicing regulator RBM11 [OS=Homo sapiens]	4.13418	1	2.12759	4.07721	0.996	2.04621	0.0105833	0.00865905	Enriched	Enriched
P48960-1	CD97 antigen [OS=Homo sapiens]	3.01935	1	1.87224	1.00851	0.506	1.35926	0.0106133	0.055472	Enriched	Rejected
Q14671-3	Isoform 3 of Pumilio homolog 1 [OS=Homo sapiens]	4.64713	1	3.66538	1.2373	0.895	1.30371	0.0106434	0.0289838	Enriched	Rejected
Q9UQN3-1	Charged multivesicular body protein 2b [OS=Homo sapiens]	3.34101	1	1.94933	4.09398	0.98	3.16703	0.0106735	0.0153037	Enriched	Rejected
Q7Z6K5-2	Isoform C15orf38-AP3S2 of Arpin [OS=Homo sapiens]	3.72508	1	2.0844	3.67509	0.993	2.18957	0.0107035	0.0105532	Enriched	Enriched
Q9P0S9	transmembrane protein 14C [OS=Homo sapiens]	18.8414	1	2.96818	0.34956	0.158	5.96337	0.0107336	0.0742333	Enriched	Rejected
P49406	39S ribosomal protein L19, mitochondrial [OS=Homo sapiens]	2.51175	1	1.62094	0.946007	0.406	1.36291	0.0107637	0.0616055	Enriched	Rejected
O95299	NADH dehydrogenase [ubiquinone] 1 alpha subcomplex subunit 10, mitochondrial [OS=Homo sapiens]	3.61053	1	2.05028	0.0708512	0.033	14.0907	0.0107937	0.0831329	Enriched	Rejected
O75027-2	Isoform 2 of ATP-binding cassette sub-family B member 7, mitochondrial [OS=Homo sapiens]	4.13736	1	2.15835	0.446186	0.123	3.73664	0.0108238	0.0761575	Enriched	Rejected
Q3MHD2-2	Isoform 2 of Protein LSM12 homolog [OS=Homo sapiens]	3.06384	1	1.76906	3.47048	0.973	3.2346	0.0108539	0.0171678	Enriched	Rejected
Q8TBQ9	Protein kish-A [OS=Homo sapiens]	3.2974	1	1.85946	3.3819	0.858	4.00128	0.0108839	0.0320806	Enriched	Rejected
Q96ST3	Paired amphipathic helix protein Sin3a [OS=Homo sapiens]	3.51036	1	2.04019	0.235215	0.498	11.9007	0.010914	0.0562237	Enriched	Rejected
O95372	acyl-protein thioesterase 2 [OS=Homo sapiens]	5.10887	1	2.84989	2.15291	0.994	1.80094	0.0109441	0.00980156	Enriched	Enriched
P52272	Heterogeneous nuclear ribonucleoprotein M [OS=Homo sapiens]	3.65837	0.999	2.41649	3.73319	0.999	1.90491	0.0109741	0.00553217	Enriched	Enriched
P33176	Kinesin-1 heavy chain [OS=Homo sapiens]	4.69427	0.999	2.23893	4.79139	0.999	2.30524	0.0110042	0.00556224	Enriched	Enriched
P29401-2	Isoform 2 of Transketolase [OS=Homo sapiens]	4.48087	0.999	2.18958	0.885754	0.396	2.81892	0.0110343	0.0621167	Enriched	Rejected
P40227-1	T-complex protein 1 subunit zeta [OS=Homo sapiens]	3.41364	0.999	2.21275	1.37912	0.711	2.702	0.0110643	0.0429345	Enriched	Rejected
P67809	Nuclease-sensitive element-binding protein 1 [OS=Homo sapiens]	2.59882	0.999	1.96245	1.22898	0.758	1.59019	0.0110944	0.0401082	Enriched	Rejected
P09429	High mobility group protein B1 [OS=Homo sapiens]	5.20452	0.999	4.31937	1.14529	0.621	2.06372	0.0111245	0.0484967	Enriched	Rejected
Q15021	condensin complex subunit 1 [OS=Homo sapiens]	2.99295	0.999	1.9972	0.538745	0.292	4.31854	0.0111545	0.0668972	Enriched	Rejected
P05198	Eukaryotic translation initiation factor 2 subunit 1 [OS=Homo sapiens]	7.05048	0.999	2.91655	2.74572	0.984	2.32911	0.0111846	0.0141612	Enriched	Rejected
P55884-2	Isoform 2 of Eukaryotic translation initiation factor 3 subunit B [OS=Homo sapiens]	4.46445	0.999	2.32368	0.64199	0.247	2.8642	0.0112147	0.0692123	Enriched	Rejected
P07384	Calpain-1 catalytic subunit [OS=Homo sapiens]	2.64322	0.999	1.73445	2.3303	0.994	2.05071	0.0112447	0.00983163	Enriched	Enriched
Q99623	Prohibitin-2 [OS=Homo sapiens]	3.40176	0.999	2.14098	1.65778	0.873	2.12953	0.0112748	0.0306675	Enriched	Rejected
Q12905	Interleukin enhancer-binding factor 2 [OS=Homo sapiens]	5.95339	0.999	2.76249	3.68165	0.819	4.96943	0.0113049	0.034997	Enriched	Rejected
Q04917	14-3-3 protein eta [OS=Homo sapiens]	9.21258	0.999	6.92092	12.2798	0.978	11.1371	0.0113349	0.0159952	Enriched	Rejected
P05388	60S acidic ribosomal protein P0 [OS=Homo sapiens]	2.46711	0.999	1.85718	0.331818	0.474	8.75765	0.011365	0.0579976	Enriched	Rejected
P62701	40S ribosomal protein S4, X isoform [OS=Homo sapiens]	3.56433	0.999	2.25281	3.16477	0.924	3.70161	0.0113951	0.0253758	Enriched	Rejected
P61221	ATP-binding cassette sub-family E member 1 [OS=Homo sapiens]	3.05051	0.999	2.1471	0.871288	0.398	2.34881	0.0114251	0.0620265	Enriched	Rejected
P37837	Transaldolase [OS=Homo sapiens]	2.66954	0.999	1.95446	0.741853	0.524	10.2779	0.0114552	0.0544197	Enriched	Rejected
P40763	Signal transducer and activator of transcription 3 [OS=Homo sapiens]	6.1922	0.999	2.62769	1.43648	0.842	1.85159	0.0114853	0.0332231	Enriched	Rejected
P28074-1	proteasome subunit beta type-5 [OS=Homo sapiens]	3.25865	0.999	1.78066	2.77316	0.984	2.2432	0.0115153	0.0141912	Enriched	Rejected
P23527	Histone H2B type 1-O [OS=Homo sapiens]	3.89064	0.999	2.33675	3.54679	0.982	3.06395	0.0115454	0.0145219	Enriched	Rejected
P25789	Proteasome subunit alpha type-4 [OS=Homo sapiens]	2.09514	0.999	1.54433	1.7762	0.953	1.76903	0.0115755	0.020926	Enriched	Rejected
Q16643-3	Isoform 3 of Drebrin [OS=Homo sapiens]	3.66649	0.999	2.35697	1.22859	0.622	2.37783	0.0116055	0.0483163	Enriched	Rejected
Q15942	Zyxin [OS=Homo sapiens]	3.46611	0.999	2.25617	5.06357	0.997	3.03307	0.0116356	0.007727	Enriched	Enriched
P22735	Protein-glutamine gamma-glutamyltransferase K [OS=Homo sapiens]	2.97108	0.999	2.04174	0.945499	0.43	1.3816	0.0116657	0.0604029	Enriched	Rejected
Q92804-1	TATA-binding protein-associated factor 2N [OS=Homo sapiens]	2.54595	0.999	1.82903	5.80901	1	2.86432	0.0116957	0.00261575	Enriched	Enriched
Q9BW27	nuclear pore complex protein Nup85 [OS=Homo sapiens]	5.10971	0.999	2.75542	7.26159	0.999	3.81028	0.0117258	0.0055923	Enriched	Enriched
Q9UNH7-1	Sorting nexin-6 [OS=Homo sapiens]	2.13655	0.999	1.69483	4.66349	0.974	4.29662	0.0117559	0.0169573	Enriched	Rejected
P07602-3	Isoform Sap-mu-9 of Prosaposin [OS=Homo sapiens]	2.5961	0.999	1.77303	1.06485	0.556	2.54617	0.0117859	0.0524955	Enriched	Rejected
Q92769	Histone deacetylase 2 [OS=Homo sapiens]	3.07134	0.999	1.95603	2.69382	0.952	2.68345	0.011816	0.0210463	Enriched	Rejected
P02511	Alpha-crystallin B chain [OS=Homo sapiens]	4.34026	0.999	2.17638	3.90204	0.899	4.60973	0.0118461	0.0284426	Enriched	Rejected
Q9UN86	Ras GTPase-activating protein-binding protein 2 [OS=Homo sapiens]	3.47534	0.999	2.09904	0.422639	0.039	2.13152	0.0118761	0.0825015	Enriched	Rejected
P37108	Signal recognition particle 14 kDa protein [OS=Homo sapiens]	7.84035	0.999	3.48241	1.50983	0.735	1.8167	0.0119062	0.0415213	Enriched	Rejected
O75223-1	gamma-glutamylcyclotransferase [OS=Homo sapiens]	2.9475	0.999	1.85898	1.20283	0.802	1.43124	0.0119363	0.0367408	Enriched	Rejected
Q06265-2	Isoform 2 of Exosome complex component RRP45 [OS=Homo sapiens]	1.99996	0.999	1.64736	3.42952	0.969	2.91215	0.0119663	0.0177691	Enriched	Rejected
Q86XR7-2	Isoform 2 of TIR domain-containing adapter molecule 2 [OS=Homo sapiens]	2.81311	0.999	1.77152	0.656143	0.294	3.84138	0.0119964	0.0668671	Enriched	Rejected
Q96P63-2	Isoform 2 of Serpin B12 [OS=Homo sapiens]	2.62488	0.999	1.74814	0.682746	0.182	1.93276	0.0120265	0.07273	Enriched	Rejected
Q5T6F2	Ubiquitin-associated protein 2 [OS=Homo sapiens]	2.93795	0.999	1.83409	1.68483	0.962	1.56543	0.0120565	0.0191221	Enriched	Rejected
P55735-3	Isoform 3 of Protein SEC13 homolog [OS=Homo sapiens]	3.52217	0.999	2.26267	0.433284	0.067	2.57736	0.0120866	0.0800661	Enriched	Rejected
Q13951	Core-binding factor subunit beta [OS=Homo sapiens]	3.62267	0.999	2.36391	1.22363	0.611	2.9198	0.0121167	0.0493686	Enriched	Rejected
P63220	40S ribosomal protein S21 [OS=Homo sapiens]	5.52241	0.999	2.78811	21.9411	1	7.95525	0.0121467	0.00264582	Enriched	Enriched
O15145	Actin-related protein 2/3 complex subunit 3 [OS=Homo sapiens]	3.45832	0.999	2.31444	6.1477	0.948	6.25654	0.0121768	0.0216176	Enriched	Rejected
P83881	60S ribosomal protein L36a [OS=Homo sapiens]	8.4901	0.999	3.83764	1.38243	0.664	2.25991	0.0122069	0.0456705	Enriched	Rejected
Q8NBX0	saccharopine dehydrogenase-like oxidoreductase [OS=Homo sapiens]	4.37087	0.999	2.32445	1.81886	0.841	2.36094	0.0122369	0.0332832	Enriched	Rejected
P78406	mRNA export factor [OS=Homo sapiens]	15.5723	0.999	3.94406	1.69934	0.961	1.68383	0.012267	0.0192123	Enriched	Rejected
Q14974	Importin subunit beta-1 [OS=Homo sapiens]	4.17922	0.998	3.00219	1.55599	0.964	1.50986	0.0122971	0.0186711	Enriched	Rejected
P04075-2	Isoform 2 of Fructose-bisphosphate aldolase A [OS=Homo sapiens]	3.06899	0.998	1.96573	1.18774	0.636	2.01735	0.0123271	0.0475947	Enriched	Rejected
P30153	serine/threonine-protein phosphatase 2A 65 kDa regulatory subunit A alpha isoform [OS=Homo sapiens]	3.43303	0.998	2.25286	1.32756	0.642	2.38804	0.0123572	0.0473241	Enriched	Rejected
P63104-1	14-3-3 protein zeta/delta [OS=Homo sapiens]	2.45158	0.998	1.7035	2.83277	0.998	2.01452	0.0123873	0.00661455	Enriched	Enriched
P14866	Heterogeneous nuclear ribonucleoprotein L [OS=Homo sapiens]	2.48956	0.998	1.84686	3.47881	0.991	2.23057	0.0124173	0.0113951	Enriched	Enriched
P61981	14-3-3 protein gamma [OS=Homo sapiens]	3.78222	0.998	2.27289	3.10601	0.972	2.67356	0.0124474	0.0173181	Enriched	Rejected
O00571	ATP-dependent RNA helicase DDX3X [OS=Homo sapiens]	5.93195	0.998	4.21438	4.31302	0.988	2.93875	0.0124775	0.0126278	Enriched	Enriched
P15880	40S ribosomal protein S2 [OS=Homo sapiens]	4.66003	0.998	2.66859	5.01389	0.997	3.65965	0.0125075	0.00775707	Enriched	Enriched
Q01581	hydroxymethylglutaryl-CoA synthase, cytoplasmic [OS=Homo sapiens]	5.59912	0.998	2.82984	1.1223	0.568	2.55131	0.0125376	0.0516236	Enriched	Rejected
O60841	Eukaryotic translation initiation factor 5B [OS=Homo sapiens]	1.96738	0.998	1.54922	1.81295	0.847	2.63434	0.0125676	0.0328623	Enriched	Rejected
Q9Y262	eukaryotic translation initiation factor 3 subunit L [OS=Homo sapiens]	5.36587	0.998	2.64836	2.89333	0.903	3.69685	0.0125977	0.0279615	Enriched	Rejected
P43358	Melanoma-associated antigen 4 [OS=Homo sapiens]	3.67796	0.998	2.51638	1.1644	0.5	2.54951	0.0126278	0.0560734	Enriched	Rejected
P30084	Enoyl-CoA hydratase, mitochondrial [OS=Homo sapiens]	2.09178	0.998	1.55359	1.15766	0.612	1.5877	0.0126578	0.0492183	Enriched	Rejected
O00303	Eukaryotic translation initiation factor 3 subunit F [OS=Homo sapiens]	7.60589	0.998	3.38984	2.81626	0.978	2.26969	0.0126879	0.0160253	Enriched	Rejected
Q9BZZ5-2	Isoform 2 of Apoptosis inhibitor 5 [OS=Homo sapiens]	9.17363	0.998	4.93394	4.85047	0.981	3.90197	0.012718	0.0149429	Enriched	Rejected
P20042	Eukaryotic translation initiation factor 2 subunit 2 [OS=Homo sapiens]	7.68156	0.998	3.58386	0.696766	0.266	2.25026	0.012748	0.0682802	Enriched	Rejected
P08134	Rho-related GTP-binding protein RhoC [OS=Homo sapiens]	2.86028	0.998	1.86237	0.946412	0.396	13.0821	0.0127781	0.0621467	Enriched	Rejected
Q08J23	tRNA (Cytosine(34)-C(5))-methyltransferase [OS=Homo sapiens]	3.92755	0.998	2.58342	0.13442	0.058	7.37013	0.0128082	0.0808779	Enriched	Rejected
P45973	chromobox protein homolog 5 [OS=Homo sapiens]	3.53015	0.998	2.46908	1.42784	0.725	1.90867	0.0128382	0.0420325	Enriched	Rejected
Q9H3S7	Tyrosine-protein phosphatase non-receptor type 23 [OS=Homo sapiens]	4.13279	0.998	2.74245	1.36781	0.781	2.00252	0.0128683	0.0382742	Enriched	Rejected
Q96GQ7	Probable ATP-dependent RNA helicase DDX27 [OS=Homo sapiens]	2.30345	0.998	1.67682	0.0233101	0.032	35.8966	0.0128984	0.083193	Enriched	Rejected
P68036-3	Isoform 3 of Ubiquitin-conjugating enzyme E2 L3 [OS=Homo sapiens]	6.19415	0.998	3.61844	4.81858	0.999	2.23586	0.0129284	0.00562237	Enriched	Enriched
O43148-2	Isoform 2 of mRNA cap guanine-N7 methyltransferase [OS=Homo sapiens]	3.04819	0.998	2.07698	4.97797	0.752	5.63762	0.0129585	0.0406194	Enriched	Rejected
P42766	60S ribosomal protein L35 [OS=Homo sapiens]	5.81648	0.998	2.92037	0.500263	0.189	2.62858	0.0129886	0.0723091	Enriched	Rejected
Q9HAV7	GrpE protein homolog 1, mitochondrial [OS=Homo sapiens]	2.76743	0.998	2.3872	2.94372	0.951	2.93735	0.0130186	0.0212568	Enriched	Rejected
P61513	60S ribosomal protein L37a [OS=Homo sapiens]	6.5324	0.998	3.59719	0.164186	0.008	3.56867	0.0130487	0.0853578	Enriched	Rejected
Q01650	large neutral amino acids transporter small subunit 1 [OS=Homo sapiens]	4.4124	0.998	2.13036	9.18247	0.986	5.19861	0.0130788	0.0132592	Enriched	Rejected
P46778	60S ribosomal protein L21 [OS=Homo sapiens]	1.77525	0.998	1.39558	0.526304	0.082	2.15056	0.0131088	0.0789838	Enriched	Rejected
Q9HD45	Transmembrane 9 superfamily member 3 [OS=Homo sapiens]	3.1157	0.998	2.26673	0.1245	0.041	7.26035	0.0131389	0.082261	Enriched	Rejected
P49207	60S ribosomal protein L34 [OS=Homo sapiens]	4.12344	0.998	2.12095	2.5395	0.998	1.90832	0.013169	0.00664462	Enriched	Enriched
P13674-1	prolyl 4-hydroxylase subunit alpha-1 [OS=Homo sapiens]	9.55242	0.998	3.92759	6.46304	1	3.46636	0.013199	0.00267589	Enriched	Enriched
P62857	40S ribosomal protein S28 [OS=Homo sapiens]	3.41933	0.998	2.13363	3.75123	1	1.96594	0.0132291	0.00270595	Enriched	Enriched
Q8WVV4-1	Isoform 1 of Protein POF1B [OS=Homo sapiens]	3.57297	0.998	2.27139	1.32441	0.725	2.09704	0.0132592	0.0420625	Enriched	Rejected
P54619-3	Isoform 3 of 5'-AMP-activated protein kinase subunit gamma-1 [OS=Homo sapiens]	2.53877	0.998	1.77509	2.06226	0.871	2.46246	0.0132892	0.0307577	Enriched	Rejected
Q9H488-1	GDP-fucose protein O-fucosyltransferase 1 [OS=Homo sapiens]	2.39354	0.998	1.77666	1.17715	0.529	2.9871	0.0133193	0.0539988	Enriched	Rejected
O75608	Acyl-protein thioesterase 1 [OS=Homo sapiens]	6.09286	0.998	3.68785	1.67747	0.787	2.25386	0.0133494	0.0378232	Enriched	Rejected
Q9NQT4	Exosome complex component RRP46 [OS=Homo sapiens]	1.92387	0.998	1.46443	0.878562	0.266	1.37714	0.0133794	0.0683103	Enriched	Rejected
P49458	Signal recognition particle 9 kDa protein [OS=Homo sapiens]	4.01295	0.998	2.25628	0.514489	0.058	1.94575	0.0134095	0.080908	Enriched	Rejected
Q712K3	Ubiquitin-conjugating enzyme E2 R2 [OS=Homo sapiens]	7.28319	0.998	5.11002	2.32029	0.587	4.71003	0.0134396	0.0505713	Enriched	Rejected
Q969X6	U3 small nucleolar RNA-associated protein 4 homolog [OS=Homo sapiens]	1.52564	0.998	1.34074	0.830837	0.057	1.19899	0.0134696	0.0810884	Enriched	Rejected
Q96HC4-6	Isoform 6 of PDZ and LIM domain protein 5 [OS=Homo sapiens]	3.2545	0.998	2.36321	1.8171	0.577	2.50171	0.0134997	0.0510523	Enriched	Rejected
Q00610-1	Clathrin heavy chain 1 [OS=Homo sapiens]	1.53383	0.997	1.34137	1.22318	0.814	1.41966	0.0135298	0.0355081	Enriched	Rejected
P27708	CAD protein [OS=Homo sapiens]	2.05727	0.997	1.54063	1.8455	0.933	1.92846	0.0135598	0.0239026	Enriched	Rejected
P02786	Transferrin receptor protein 1 [OS=Homo sapiens]	3.2514	0.997	2.15544	1.18573	0.616	2.83291	0.0135899	0.0488575	Enriched	Rejected
P52597	Heterogeneous nuclear ribonucleoprotein F [OS=Homo sapiens]	3.19312	0.997	2.34816	1.87153	0.882	2.47594	0.01362	0.030006	Enriched	Rejected
Q92945	Far upstream element-binding protein 2 [OS=Homo sapiens]	3.43357	0.997	2.09216	0.168316	0.279	9.63017	0.01365	0.0675286	Enriched	Rejected
Q15008	26S proteasome non-ATPase regulatory subunit 6 [OS=Homo sapiens]	5.34732	0.997	3.83972	7.50895	1	3.97681	0.0136801	0.00273602	Enriched	Enriched
P46821	microtubule-associated protein 1B [OS=Homo sapiens]	3.07082	0.997	2.10676	2.01497	0.997	1.55118	0.0137102	0.00778713	Enriched	Enriched
P47756-2	Isoform 2 of F-actin-capping protein subunit beta [OS=Homo sapiens]	4.64146	0.997	2.43648	7.67627	1	2.56921	0.0137402	0.00276609	Enriched	Enriched
P12004	proliferating cell nuclear antigen [OS=Homo sapiens]	7.01539	0.997	2.73998	3.67367	0.988	2.54811	0.0137703	0.0126578	Enriched	Enriched
O95793	double-stranded RNA-binding protein Staufen homolog 1 [OS=Homo sapiens]	5.21811	0.997	3.57478	10.7391	0.965	9.78661	0.0138004	0.0183704	Enriched	Rejected
P50895	Basal cell adhesion molecule [OS=Homo sapiens]	2.59488	0.997	1.92285	0.540245	0.17	2.47441	0.0138304	0.0735117	Enriched	Rejected
O75475-1	PC4 and SFRS1-interacting protein [OS=Homo sapiens]	14.9763	0.997	3.66214	0.615335	0.31	23.749	0.0138605	0.0660854	Enriched	Rejected
P46781	40S ribosomal protein S9 [OS=Homo sapiens]	2.33989	0.997	1.91909	1.68869	0.928	1.80063	0.0138906	0.024564	Enriched	Rejected
P25788-1	Proteasome subunit alpha type-3 [OS=Homo sapiens]	4.89936	0.997	2.7947	0.84473	0.368	3.03592	0.0139206	0.0634696	Enriched	Rejected
P37268	squalene synthase [OS=Homo sapiens]	2.09628	0.997	1.65662	0.52984	0.094	2.25892	0.0139507	0.078172	Enriched	Rejected
O43290	U4/U6.U5 tri-snRNP-associated protein 1 [OS=Homo sapiens]	7.89219	0.997	5.68581	2.57034	0.945	2.6293	0.0139808	0.0218882	Enriched	Rejected
O95747	Serine/threonine-protein kinase OSR1 [OS=Homo sapiens]	2.6418	0.997	1.98211	2.27357	0.882	3.30356	0.0140108	0.0300361	Enriched	Rejected
P35659-1	Protein DEK [OS=Homo sapiens]	6.71008	0.997	3.19551	1.80198	0.899	2.12722	0.0140409	0.0284726	Enriched	Rejected
Q9NYF8-1	Bcl-2-associated transcription factor 1 [OS=Homo sapiens]	3.95627	0.997	2.1181	0.954962	0.489	3.00667	0.014071	0.0568851	Enriched	Rejected
P20645	Cation-dependent mannose-6-phosphate receptor [OS=Homo sapiens]	8.62897	0.997	4.23173	2.54153	0.982	2.13972	0.014101	0.014552	Enriched	Rejected
Q9Y613	FH1/FH2 domain-containing protein 1 [OS=Homo sapiens]	2.23373	0.997	1.74175	0.636552	0.197	2.87436	0.0141311	0.0720385	Enriched	Rejected
Q6UWP8-1	Suprabasin [OS=Homo sapiens]	2.31355	0.997	1.75496	1.02203	0.566	1.4791	0.0141612	0.0518942	Enriched	Rejected
P55196-5	Isoform 5 of Afadin [OS=Homo sapiens]	3.28311	0.997	2.05955	0.753057	0.368	2.97719	0.0141912	0.0634997	Enriched	Rejected
Q13126-1	S-methyl-5'-thioadenosine phosphorylase [OS=Homo sapiens]	3.356	0.997	2.9482	3.00446	0.867	4.29227	0.0142213	0.0309982	Enriched	Rejected
P49593	Protein phosphatase 1F [OS=Homo sapiens]	90.0856	0.997	62.4558	1.05087	0.554	7.9423	0.0142514	0.0525256	Enriched	Rejected
Q6ZVX7	F-box only protein 50 [OS=Homo sapiens]	2.96642	0.997	2.01693	3.39349	0.92	3.68789	0.0142814	0.0260974	Enriched	Rejected
P51153	Ras-related protein Rab-13 [OS=Homo sapiens]	3.39105	0.997	2.28202	0.584306	0.218	2.75626	0.0143115	0.0706855	Enriched	Rejected
P02774-3	Isoform 3 of Vitamin D-binding protein [OS=Homo sapiens]	2.44186	0.997	1.91096	0.947741	0.489	1.84203	0.0143416	0.0569152	Enriched	Rejected
Q15043	Zinc transporter ZIP14 [OS=Homo sapiens]	4.18856	0.997	2.316	1.15643	0.72	1.40103	0.0143716	0.0423632	Enriched	Rejected
Q13685	angio-associated migratory cell protein [OS=Homo sapiens]	2.20298	0.997	1.68519	0.79579	0.284	1.95996	0.0144017	0.0673181	Enriched	Rejected
Q9UBV8	Peflin [OS=Homo sapiens]	6.11494	0.997	4.91149	1.64292	0.991	1.44395	0.0144317	0.0114251	Enriched	Enriched
P47914	60S ribosomal protein L29 [OS=Homo sapiens]	2.2897	0.997	1.77956	4.24517	0.996	3.08746	0.0144618	0.00868912	Enriched	Enriched
Q13835	Plakophilin-1 [OS=Homo sapiens]	4.44839	0.997	2.33237	0.837836	0.367	2.20758	0.0144919	0.0635298	Enriched	Rejected
P61970	nuclear transport factor 2 [OS=Homo sapiens]	4.46215	0.997	2.39294	1.49198	0.828	1.60176	0.0145219	0.0342754	Enriched	Rejected
Q99460	26S proteasome non-ATPase regulatory subunit 1 [OS=Homo sapiens]	4.13893	0.996	2.60721	2.67628	0.964	2.50685	0.014552	0.0187011	Enriched	Rejected
P09874	Poly [ADP-ribose] polymerase 1 [OS=Homo sapiens]	2.40221	0.996	1.74797	0.654701	0.313	3.36304	0.0145821	0.065905	Enriched	Rejected
P04843	Dolichyl-diphosphooligosaccharide--protein glycosyltransferase subunit 1 [OS=Homo sapiens]	3.31892	0.996	2.15979	1.98806	0.838	3.02008	0.0146121	0.0334937	Enriched	Rejected
P49915	GMP synthase [glutamine-hydrolyzing] [OS=Homo sapiens]	2.77844	0.996	1.98515	0.5881	0.11	2.09814	0.0146422	0.0769393	Enriched	Rejected
P29692-2	Isoform 2 of Elongation factor 1-delta [OS=Homo sapiens]	2.16156	0.996	1.65353	0.497214	0.113	2.42495	0.0146723	0.0767889	Enriched	Rejected
P05141	ADP/ATP translocase 2 [OS=Homo sapiens]	6.32137	0.996	3.12728	1.07515	0.526	7.64182	0.0147023	0.0543295	Enriched	Rejected
Q14195-2	Isoform LCRMP-4 of Dihydropyrimidinase-related protein 3 [OS=Homo sapiens]	3.64462	0.996	2.04243	5.12201	0.839	6.08184	0.0147324	0.0334336	Enriched	Rejected
P26583	High mobility group protein B2 [OS=Homo sapiens]	2.84082	0.996	1.93678	1.62472	0.865	2.15127	0.0147625	0.0312688	Enriched	Rejected
P21399	Cytoplasmic aconitate hydratase [OS=Homo sapiens]	4.66976	0.996	2.77206	0.209598	0.062	4.84465	0.0147925	0.0804871	Enriched	Rejected
Q14690	Protein RRP5 homolog [OS=Homo sapiens]	2.1557	0.996	1.74745	0.209935	0.002	2.48685	0.0148226	0.085929	Enriched	Rejected
P61313-1	60S ribosomal protein L15 [OS=Homo sapiens]	3.02613	0.996	2.36812	8.44654	0.938	9.82872	0.0148527	0.0229705	Enriched	Rejected
O00264	Membrane-associated progesterone receptor component 1 [OS=Homo sapiens]	7.20352	0.996	2.76715	1.64434	0.674	3.97926	0.0148827	0.0451594	Enriched	Rejected
Q13867	bleomycin hydrolase [OS=Homo sapiens]	6.62285	0.996	5.01188	74.8207	0.809	89.2705	0.0149128	0.0360192	Enriched	Rejected
Q07020	60S ribosomal protein L18 [OS=Homo sapiens]	3.75115	0.996	2.26544	0.53894	0.097	2.33677	0.0149429	0.0779615	Enriched	Rejected
Q9NVP1	ATP-dependent RNA helicase DDX18 [OS=Homo sapiens]	5.68168	0.996	2.53382	4.83278	0.981	3.5864	0.0149729	0.0149729	Enriched	Rejected
P49189	4-trimethylaminobutyraldehyde dehydrogenase [OS=Homo sapiens]	2.71259	0.996	2.01583	0.201945	0.034	3.95738	0.015003	0.0829525	Enriched	Rejected
P53990-5	Isoform 5 of IST1 homolog [OS=Homo sapiens]	5.62343	0.996	2.76566	7.94068	0.961	7.6243	0.0150331	0.0192423	Enriched	Rejected
Q9BWD1-2	Isoform 2 of Acetyl-CoA acetyltransferase, cytosolic [OS=Homo sapiens]	2.55428	0.996	1.94324	8.19861	0.955	8.11182	0.0150631	0.0205051	Enriched	Rejected
P00450	Ceruloplasmin [OS=Homo sapiens]	1.59133	0.996	1.40807	2.75898	1	1.97914	0.0150932	0.00279615	Enriched	Enriched
Q96A72	protein mago nashi homolog 2 [OS=Homo sapiens]	4.15161	0.996	2.8538	2.67432	0.732	3.93701	0.0151233	0.0415815	Enriched	Rejected
Q12768	WASH complex subunit 5 [OS=Homo sapiens]	4.12262	0.996	2.69849	1.43782	0.741	3.038	0.0151533	0.0412508	Enriched	Rejected
P84095	Rho-related GTP-binding protein RhoG [OS=Homo sapiens]	7.63849	0.996	4.26484	0.127222	0.012	3.61873	0.0151834	0.0848467	Enriched	Rejected
Q13243-1	Serine/arginine-rich splicing factor 5 [OS=Homo sapiens]	16.9691	0.996	3.95227	2.85576	0.621	10.1755	0.0152135	0.0485268	Enriched	Rejected
Q6Y7W6-3	Isoform 2 of GRB10-interacting GYF protein 2 [OS=Homo sapiens]	2.70197	0.996	2.08922	5.48591	1	2.26527	0.0152435	0.00282622	Enriched	Enriched
P35237	serpin B6 [OS=Homo sapiens]	10.5131	0.996	3.3775	1.03648	0.508	1.65919	0.0152736	0.0553217	Enriched	Rejected
Q01085-2	Isoform 2 of Nucleolysin TIAR [OS=Homo sapiens]	5.70641	0.996	2.41793	0.243542	0.034	3.97303	0.0153037	0.0829826	Enriched	Rejected
O75330-3	Isoform 3 of Hyaluronan mediated motility receptor [OS=Homo sapiens]	3.64095	0.996	2.20419	0.318414	0.076	3.7446	0.0153337	0.079555	Enriched	Rejected
Q969N2	GPI transamidase component PIG-T [OS=Homo sapiens]	2.01699	0.996	1.56829	9.29178	0.986	4.41302	0.0153638	0.0132892	Enriched	Rejected
P28072	Proteasome subunit beta type-6 [OS=Homo sapiens]	2.92527	0.996	2.01604	1.7151	0.963	1.65254	0.0153939	0.0188214	Enriched	Rejected
Q92979	Ribosomal RNA small subunit methyltransferase Nep1 [OS=Homo sapiens]	8.24203	0.996	3.65318	1.1165	0.524	5.17384	0.0154239	0.0544498	Enriched	Rejected
Q9NVI1-3	Fanconi anemia group I protein [OS=Homo sapiens]	4.48052	0.996	2.27569	0.575393	0.058	1.77696	0.015454	0.0809381	Enriched	Rejected
P01040	Cystatin-A [OS=Homo sapiens]	2.73587	0.996	1.7286	0.520047	0.134	2.82176	0.0154841	0.0755863	Enriched	Rejected
Q9UI42-1	Carboxypeptidase A4 [OS=Homo sapiens]	2.38179	0.996	1.74314	0.903054	0.433	1.77873	0.0155141	0.0601924	Enriched	Rejected
P00966	Argininosuccinate synthase [OS=Homo sapiens]	6.78886	0.996	3.87876	11.9071	0.802	14.9229	0.0155442	0.0367709	Enriched	Rejected
P50747	biotin--protein ligase [OS=Homo sapiens]	4.67404	0.996	2.74814	8.97584	0.999	5.73475	0.0155743	0.00565244	Enriched	Enriched
P60842	Eukaryotic initiation factor 4A-I [OS=Homo sapiens]	2.49349	0.995	1.67639	0.592413	0.473	3.31746	0.0156043	0.0580878	Enriched	Rejected
Q9P2E9-1	Ribosome-binding protein 1 [OS=Homo sapiens]	3.05364	0.995	2.11452	1.54512	0.851	1.99535	0.0156344	0.0326819	Enriched	Rejected
P27635	60S ribosomal protein L10 [OS=Homo sapiens]	4.79374	0.995	2.9939	0.425896	0.084	2.81347	0.0156645	0.0788034	Enriched	Rejected
P21281	V-type proton ATPase subunit B, brain isoform [OS=Homo sapiens]	2.24801	0.995	1.68857	0.991625	0.493	2.32658	0.0156945	0.0565845	Enriched	Rejected
P07737	profilin-1 [OS=Homo sapiens]	3.81306	0.995	2.3532	2.736	0.916	3.16053	0.0157246	0.0265484	Enriched	Rejected
O75874	Isocitrate dehydrogenase [NADP] cytoplasmic [OS=Homo sapiens]	2.62756	0.995	1.9341	6.14459	1	2.40192	0.0157547	0.00285628	Enriched	Enriched
Q9Y224	UPF0568 protein C14orf166 [OS=Homo sapiens]	3.18534	0.995	2.265	2.78843	0.956	2.68314	0.0157847	0.020445	Enriched	Rejected
P62841	40S ribosomal protein S15 [OS=Homo sapiens]	2.70837	0.995	1.86135	1.13944	0.566	4.05241	0.0158148	0.0519242	Enriched	Rejected
P46782	40S ribosomal protein S5 [OS=Homo sapiens]	3.14788	0.995	2.18223	2.36699	0.999	1.77906	0.0158449	0.0056825	Enriched	Enriched
Q9H910-3	Isoform 3 of Jupiter microtubule associated homolog 2 [OS=Homo sapiens]	3.16705	0.995	2.41941	1.8525	0.92	2.03196	0.0158749	0.0261275	Enriched	Rejected
Q9Y295	developmentally-regulated GTP-binding protein 1 [OS=Homo sapiens]	4.92892	0.995	2.76674	0.208734	0.005	3.93848	0.015905	0.0856284	Enriched	Rejected
O43592	Exportin-T [OS=Homo sapiens]	2.58329	0.995	1.86066	3.13523	0.965	2.73291	0.0159351	0.0184005	Enriched	Rejected
P47813	Eukaryotic translation initiation factor 1A, X-chromosomal [OS=Homo sapiens]	2.86498	0.995	2.06371	9.07478	0.99	5.31325	0.0159651	0.011816	Enriched	Enriched
Q9Y5S9	RNA-binding protein 8A [OS=Homo sapiens]	5.8502	0.995	4.14943	5.11128	0.97	3.98154	0.0159952	0.0175586	Enriched	Rejected
O75146	Huntingtin-interacting protein 1-related protein [OS=Homo sapiens]	2.58609	0.995	1.95545	0.971555	0.495	2.94656	0.0160253	0.0564041	Enriched	Rejected
Q5BKZ1	DBIRD complex subunit ZNF326 [OS=Homo sapiens]	3.7053	0.995	2.47932	4.25867	0.908	5.29189	0.0160553	0.0276007	Enriched	Rejected
Q9UDY4	DnaJ homolog subfamily B member 4 [OS=Homo sapiens]	2.95719	0.995	1.98219	1.32315	0.72	1.83267	0.0160854	0.0423933	Enriched	Rejected
Q05086	Ubiquitin-protein ligase E3A [OS=Homo sapiens]	3.28475	0.995	2.16823	5.39395	1	2.53675	0.0161155	0.00288635	Enriched	Enriched
P51571	translocon-associated protein subunit delta [OS=Homo sapiens]	4.07658	0.995	2.4419	38.9615	0.997	31.517	0.0161455	0.0078172	Enriched	Enriched
Q9BXY0	Protein MAK16 homolog [OS=Homo sapiens]	16.5267	0.995	7.56641	2.23252	0.862	3.90896	0.0161756	0.0315995	Enriched	Rejected
Q8IVF2-1	Protein AHNAK2 [OS=Homo sapiens]	1.80101	0.994	1.44509	2.05039	1	1.52128	0.0162057	0.00291642	Enriched	Enriched
Q16555-1	Dihydropyrimidinase-related protein 2 [OS=Homo sapiens]	7.777	0.994	3.01169	0.797288	0.372	3.46738	0.0162357	0.063199	Enriched	Rejected
Q9Y2X3	Nucleolar protein 58 [OS=Homo sapiens]	6.38033	0.994	3.27787	3.22637	0.894	4.09313	0.0162658	0.0290138	Enriched	Rejected
P13489	Ribonuclease inhibitor [OS=Homo sapiens]	2.33777	0.994	1.88891	0.124827	0.101	9.62041	0.0162959	0.0774203	Enriched	Rejected
Q9UHX1-2	Isoform 2 of Poly(U)-binding-splicing factor PUF60 [OS=Homo sapiens]	3.57745	0.994	2.25836	5.3818	0.989	3.74312	0.0163259	0.0121167	Enriched	Enriched
P11387	DNA topoisomerase 1 [OS=Homo sapiens]	6.8032	0.994	3.79464	1.74641	0.841	2.35851	0.016356	0.0333133	Enriched	Rejected
P62263	40S ribosomal protein S14 [OS=Homo sapiens]	4.59986	0.994	2.86645	6.07945	0.789	14.2716	0.016386	0.0376428	Enriched	Rejected
P18621-3	Isoform 3 of 60S ribosomal protein L17 [OS=Homo sapiens]	5.67645	0.994	2.65227	1.76679	0.782	3.5094	0.0164161	0.038184	Enriched	Rejected
P30050-1	60S ribosomal protein L12 [OS=Homo sapiens]	2.90727	0.994	1.84613	1.53686	0.651	4.20089	0.0164462	0.0467529	Enriched	Rejected
Q8TCT9-1	Minor histocompatibility antigen H13 [OS=Homo sapiens]	22.3232	0.994	3.88117	2.4051	0.808	3.97378	0.0164762	0.0361094	Enriched	Rejected
P52788-1	Spermine synthase [OS=Homo sapiens]	2.48062	0.994	2.28659	0.196029	0.241	13.574	0.0165063	0.069543	Enriched	Rejected
O75347	Tubulin-specific chaperone A [OS=Homo sapiens]	6.04822	0.994	4.83349	0.039879	0.004	9.76194	0.0165364	0.0856885	Enriched	Rejected
P63151-2	Isoform 2 of Serine/threonine-protein phosphatase 2A 55 kDa regulatory subunit B alpha isoform [OS=Homo sapiens]	1.97415	0.994	1.67997	5.84774	0.997	3.02338	0.0165664	0.00784726	Enriched	Enriched
P01111	GTPase NRas [OS=Homo sapiens]	9.13815	0.994	4.58631	0.340865	0.378	3.91547	0.0165965	0.0628382	Enriched	Rejected
Q5T750	Skin-specific protein 32 [OS=Homo sapiens]	2.63	0.994	1.83589	0.57491	0.084	1.85439	0.0166266	0.0788334	Enriched	Rejected
Q86UE4	protein LYRIC [OS=Homo sapiens]	1.58915	0.994	1.40274	1.17484	0.767	1.45459	0.0166566	0.0393867	Enriched	Rejected
Q99584	Protein S100-A13 [OS=Homo sapiens]	2.87709	0.994	2.20328	0.658227	0.045	1.49857	0.0166867	0.0819603	Enriched	Rejected
Q96I25	Splicing factor 45 [OS=Homo sapiens]	6.14605	0.994	4.76552	3.81633	0.999	1.95521	0.0167168	0.00571257	Enriched	Enriched
Q96M27-2	Isoform 2 of Protein PRRC1 [OS=Homo sapiens]	3.40143	0.994	2.31668	1.49344	0.683	3.38489	0.0167468	0.0447384	Enriched	Rejected
Q5JRA6-1	Melanoma inhibitory activity protein 3 [OS=Homo sapiens]	7.12865	0.994	2.90319	9.45359	0.749	17.8428	0.0167769	0.0407998	Enriched	Rejected
Q8IXQ6	Poly [ADP-ribose] polymerase 9 [OS=Homo sapiens]	1.24873	0.994	1.16927	1.1925	0.83	1.35026	0.016807	0.0341251	Enriched	Rejected
Q03252	Lamin-B2 [OS=Homo sapiens]	15.9194	0.993	13.2298	9.49739	0.959	9.03581	0.016837	0.0198437	Enriched	Rejected
P49748-3	Isoform 3 of Very long-chain specific acyl-CoA dehydrogenase, mitochondrial [OS=Homo sapiens]	3.10405	0.993	2.48796	0.625712	0.187	2.17363	0.0168671	0.0724293	Enriched	Rejected
Q14008-3	Isoform 3 of Cytoskeleton-associated protein 5 [OS=Homo sapiens]	3.05413	0.993	2.0817	4.44323	1	2.27646	0.0168972	0.00294648	Enriched	Enriched
P32969	60S ribosomal protein L9 [OS=Homo sapiens]	3.15824	0.993	2.29987	3.08007	0.906	6.59964	0.0169272	0.027721	Enriched	Rejected
Q96KP4	cytosolic non-specific dipeptidase [OS=Homo sapiens]	3.31061	0.993	2.5948	14.9874	1	5.31119	0.0169573	0.00297655	Enriched	Enriched
Q9H845	Acyl-CoA dehydrogenase family member 9, mitochondrial [OS=Homo sapiens]	5.11469	0.993	3.52762	4.91717	1	2.32542	0.0169874	0.00300661	Enriched	Enriched
O00116	Alkyldihydroxyacetonephosphate synthase, peroxisomal [OS=Homo sapiens]	4.22382	0.993	2.59645	0.422146	0.223	5.99086	0.0170174	0.0702946	Enriched	Rejected
P52294	Importin subunit alpha-5 [OS=Homo sapiens]	4.22943	0.993	2.80402	0.503469	0.425	6.6269	0.0170475	0.0606133	Enriched	Rejected
Q9NZB2-6	Isoform F of Constitutive coactivator of PPAR-gamma-like protein 1 [OS=Homo sapiens]	3.35725	0.993	2.44769	1.54078	0.695	2.39858	0.0170776	0.044077	Enriched	Rejected
O75116	Rho-associated protein kinase 2 [OS=Homo sapiens]	2.39574	0.993	2.01091	1.82691	0.903	2.15288	0.0171076	0.0279916	Enriched	Rejected
Q9UKV3-1	Apoptotic chromatin condensation inducer in the nucleus [OS=Homo sapiens]	15.4176	0.993	12.1296	9.19665	1	2.826	0.0171377	0.00303668	Enriched	Enriched
O15372	Eukaryotic translation initiation factor 3 subunit H [OS=Homo sapiens]	3.40136	0.993	2.40834	129.47	0.543	201.246	0.0171678	0.0532471	Enriched	Rejected
P62829	60S ribosomal protein L23 [OS=Homo sapiens]	5.23283	0.993	3.6602	0.804673	0.45	5.95855	0.0171978	0.0593506	Enriched	Rejected
O95232-1	Luc7-like protein 3 [OS=Homo sapiens]	3.27246	0.993	2.03254	6.00628	0.985	4.48919	0.0172279	0.0136801	Enriched	Rejected
P49755	Transmembrane emp24 domain-containing protein 10 [OS=Homo sapiens]	2.03977	0.993	1.70622	8.97813	0.782	11.1838	0.017258	0.0382141	Enriched	Rejected
O15270	Serine palmitoyltransferase 2 [OS=Homo sapiens]	4.54381	0.993	3.28743	1.46983	0.77	3.37848	0.017288	0.0392363	Enriched	Rejected
Q3V6T2-1	Girdin [OS=Homo sapiens]	3.3214	0.993	2.83766	1.94472	0.855	2.1286	0.0173181	0.0324113	Enriched	Rejected
Q6PI78	Transmembrane protein 65 [OS=Homo sapiens]	4.30964	0.993	2.57917	0.516342	0.18	5.30828	0.0173482	0.0730006	Enriched	Rejected
Q9ULJ3	Zinc finger and BTB domain-containing protein 21 [OS=Homo sapiens]	2.02113	0.993	1.61326	0.958488	0.401	1.34365	0.0173782	0.0618461	Enriched	Rejected
Q92598	Heat shock protein 105 kDa [OS=Homo sapiens]	1.93527	0.992	1.63012	2.88097	0.994	1.90938	0.0174083	0.0098617	Enriched	Enriched
P23528	Cofilin-1 [OS=Homo sapiens]	2.41114	0.992	1.80582	2.27665	0.916	2.4687	0.0174384	0.0265785	Enriched	Rejected
P27695	DNA-(apurinic or apyrimidinic site) lyase [OS=Homo sapiens]	4.19112	0.992	3.28416	8.73308	0.968	7.3866	0.0174684	0.0178894	Enriched	Rejected
P34897-1	Serine hydroxymethyltransferase, mitochondrial [OS=Homo sapiens]	2.02499	0.992	1.61908	2.90319	0.958	2.82052	0.0174985	0.0201143	Enriched	Rejected
O43776	Asparagine--tRNA ligase, cytoplasmic [OS=Homo sapiens]	3.34908	0.992	2.08045	1.29437	0.645	2.30504	0.0175286	0.0470836	Enriched	Rejected
P62750	60S ribosomal protein L23a [OS=Homo sapiens]	1.86493	0.992	1.57896	2.78509	0.982	2.03522	0.0175586	0.0145821	Enriched	Rejected
Q16851	UTP--glucose-1-phosphate uridylyltransferase [OS=Homo sapiens]	2.62527	0.992	1.73594	4.18935	0.95	4.19048	0.0175887	0.021347	Enriched	Rejected
Q14677-3	Isoform 3 of Clathrin interactor 1 [OS=Homo sapiens]	3.17861	0.992	1.99134	1.61191	0.806	2.27203	0.0176188	0.0362898	Enriched	Rejected
Q15369-1	elongin-C [OS=Homo sapiens]	4.33151	0.992	3.16358	4.59369	0.931	4.93539	0.0176488	0.024113	Enriched	Rejected
Q9NTZ6	RNA-binding protein 12 [OS=Homo sapiens]	3.56228	0.992	2.30633	1.05109	0.56	2.33756	0.0176789	0.052255	Enriched	Rejected
O43583	density-regulated protein [OS=Homo sapiens]	4.87949	0.992	4.16955	0.568562	0.215	2.51458	0.017709	0.070896	Enriched	Rejected
P29144	Tripeptidyl-peptidase 2 [OS=Homo sapiens]	27.5714	0.992	10.6114	0.875409	0.342	2.87582	0.017739	0.0643716	Enriched	Rejected
Q4V328	GRIP1-associated protein 1 [OS=Homo sapiens]	35.3916	0.992	31.5034	1.09871	0.746	1.26334	0.0177691	0.0409501	Enriched	Rejected
P09234	U1 small nuclear ribonucleoprotein C [OS=Homo sapiens]	1.94531	0.992	1.79846	2.41155	0.799	3.08902	0.0177992	0.0370415	Enriched	Rejected
Q8IZ83	Aldehyde dehydrogenase family 16 member A1 [OS=Homo sapiens]	5.05096	0.992	3.60592	0.569428	0.257	3.37634	0.0178292	0.068641	Enriched	Rejected
P21127-1	Cyclin-dependent kinase 11B [OS=Homo sapiens]	6.06107	0.992	3.19005	1.10037	0.549	3.54593	0.0178593	0.0528863	Enriched	Rejected
P35241-5	Isoform 5 of Radixin [OS=Homo sapiens]	4.09942	0.991	2.73712	2.04474	0.987	1.73642	0.0178894	0.0129284	Enriched	Rejected
Q14764	major vault protein [OS=Homo sapiens]	5.0166	0.991	4.00659	3.89955	0.999	2.08908	0.0179194	0.00574263	Enriched	Enriched
O76021	Ribosomal L1 domain-containing protein 1 [OS=Homo sapiens]	3.82711	0.991	2.9119	0.374708	0.036	2.38057	0.0179495	0.0828322	Enriched	Rejected
P08243-1	Asparagine synthetase [glutamine-hydrolyzing] [OS=Homo sapiens]	3.34094	0.991	2.65059	7.45737	0.992	3.83253	0.0179796	0.0110643	Enriched	Enriched
Q14192	Four and a half LIM domains protein 2 [OS=Homo sapiens]	2.75658	0.991	2.05624	10.5805	0.982	6.18066	0.0180096	0.0146121	Enriched	Rejected
P08708	40S ribosomal protein S17 [OS=Homo sapiens]	2.86783	0.991	2.32093	7.48181	0.957	7.29955	0.0180397	0.0202345	Enriched	Rejected
Q92688	Acidic leucine-rich nuclear phosphoprotein 32 family member B [OS=Homo sapiens]	8.73333	0.991	6.60016	1.70322	0.828	2.5301	0.0180698	0.0343055	Enriched	Rejected
P78417	Glutathione S-transferase omega-1 [OS=Homo sapiens]	5.76427	0.991	3.95342	0.293195	0.5	10.8361	0.0180998	0.0561034	Enriched	Rejected
Q6PKG0-1	La-related protein 1 [OS=Homo sapiens]	2.15345	0.991	1.74537	0.616528	0.223	2.84467	0.0181299	0.0703247	Enriched	Rejected
O94915-1	protein furry homolog-like [OS=Homo sapiens]	2.76244	0.991	2.18989	0.0379014	0	3.6604	0.01816	0.0860493	Enriched	Rejected
Q4G0J3-3	Isoform 3 of La-related protein 7 [OS=Homo sapiens]	5.02054	0.991	4.41906	0.292864	0.11	14.773	0.01819	0.0769693	Enriched	Rejected
O75342	Arachidonate 12-lipoxygenase, 12R-type [OS=Homo sapiens]	2.24073	0.991	1.87634	0.528607	0.038	1.81552	0.0182201	0.0825616	Enriched	Rejected
Q9Y4C2-1	TRPM8 channel-associated factor 1 [OS=Homo sapiens]	3.98699	0.991	2.42476	14.3634	0.997	4.5285	0.0182502	0.00787733	Enriched	Enriched
Q6P2Q9	Pre-mRNA-processing-splicing factor 8 [OS=Homo sapiens]	2.36984	0.99	1.85747	1.16946	0.705	1.91789	0.0182802	0.0432652	Enriched	Rejected
Q9Y230	RuvB-like 2 [OS=Homo sapiens]	1.86156	0.99	1.57636	1.79907	0.874	2.30965	0.0183103	0.0306073	Enriched	Rejected
P42167	Lamina-associated polypeptide 2, isoforms beta/gamma [OS=Homo sapiens]	3.22944	0.99	2.46933	1.81329	0.938	1.88931	0.0183403	0.0230006	Enriched	Rejected
P06454-1	Prothymosin alpha [OS=Homo sapiens]	3.00345	0.99	2.53975	4.09631	0.953	3.90094	0.0183704	0.0209561	Enriched	Rejected
P30085-1	UMP-CMP kinase [OS=Homo sapiens]	15.5969	0.99	10.8483	4.06903	0.926	5.06666	0.0184005	0.0249549	Enriched	Rejected
Q00796	Sorbitol dehydrogenase [OS=Homo sapiens]	2.69814	0.99	2.20251	3.47922	0.967	3.29024	0.0184305	0.0179796	Enriched	Rejected
P84103	Serine/arginine-rich splicing factor 3 [OS=Homo sapiens]	7.00611	0.99	3.29878	0.678638	0.249	2.25406	0.0184606	0.0690018	Enriched	Rejected
Q16795	NADH dehydrogenase [ubiquinone] 1 alpha subcomplex subunit 9, mitochondrial [OS=Homo sapiens]	12.4931	0.99	4.11563	6.61557	0.985	4.16539	0.0184907	0.0137102	Enriched	Rejected
O14828	Secretory carrier-associated membrane protein 3 [OS=Homo sapiens]	4.80785	0.99	3.0813	4.31573	0.998	2.87212	0.0185207	0.00667468	Enriched	Enriched
Q96EP5	DAZ-associated protein 1 [OS=Homo sapiens]	2.12051	0.99	1.62593	1.17956	0.664	1.95252	0.0185508	0.0457005	Enriched	Rejected
P35813-3	Isoform 3 of Protein phosphatase 1A [OS=Homo sapiens]	3.94583	0.99	3.50462	1.33776	0.764	1.98259	0.0185809	0.0396272	Enriched	Rejected
Q8N3U4-2	Isoform 2 of Cohesin subunit SA-2 [OS=Homo sapiens]	1.42063	0.99	1.27498	0.590933	0.07	1.75204	0.0186109	0.0798857	Enriched	Rejected
P19404	NADH dehydrogenase [ubiquinone] flavoprotein 2, mitochondrial [OS=Homo sapiens]	5.10208	0.99	2.76693	1.34521	0.746	2.36271	0.018641	0.0409802	Enriched	Rejected
Q9GZP4	PITH domain-containing protein 1 [OS=Homo sapiens]	3.09555	0.99	2.15825	0.49772	0.054	2.01533	0.0186711	0.0813289	Enriched	Rejected
Q14980-1	nuclear mitotic apparatus protein 1 [OS=Homo sapiens]	2.74084	0.989	1.98818	2.73743	0.98	2.20087	0.0187011	0.0153337	Enriched	Rejected
O95817	BAG family molecular chaperone regulator 3 [OS=Homo sapiens]	3.25663	0.989	2.20695	4.51783	0.999	2.4708	0.0187312	0.0057727	Enriched	Enriched
Q13442	28 kDa heat- and acid-stable phosphoprotein [OS=Homo sapiens]	2.12567	0.989	1.64103	2.47341	0.872	3.05874	0.0187613	0.0307276	Enriched	Rejected
Q14254	Flotillin-2 [OS=Homo sapiens]	5.55684	0.989	4.66032	13.6179	0.999	3.6802	0.0187913	0.00580277	Enriched	Enriched
P31153	S-adenosylmethionine synthase isoform type-2 [OS=Homo sapiens]	2.75801	0.989	2.3696	3.65544	0.645	15.1066	0.0188214	0.0471137	Enriched	Rejected
Q9Y6H1	Coiled-coil-helix-coiled-coil-helix domain-containing protein 2 [OS=Homo sapiens]	6.64683	0.989	6.36062	0.364924	0.095	3.11875	0.0188515	0.0780818	Enriched	Rejected
Q96LB3-1	Intraflagellar transport protein 74 homolog [OS=Homo sapiens]	2.9421	0.989	2.30812	4.71426	1	2.53023	0.0188815	0.00306675	Enriched	Enriched
Q92734-1	Protein TFG [OS=Homo sapiens]	3.84005	0.989	2.7033	3.34398	0.994	2.36971	0.0189116	0.00989176	Enriched	Enriched
Q8NFJ5	Retinoic acid-induced protein 3 [OS=Homo sapiens]	2.33189	0.989	1.94655	22.741	0.991	12.1126	0.0189417	0.0114552	Enriched	Enriched
Q9NZ08-2	Isoform 2 of Endoplasmic reticulum aminopeptidase 1 [OS=Homo sapiens]	3.66541	0.989	2.53123	5.88751	0.913	6.67478	0.0189717	0.0269693	Enriched	Rejected
Q9H9A5-6	Isoform 6 of CCR4-NOT transcription complex subunit 10 [OS=Homo sapiens]	3.52854	0.989	2.90389	1.6401	0.6	2.17037	0.0190018	0.0498497	Enriched	Rejected
Q6VN20	Ran-binding protein 10 [OS=Homo sapiens]	1.67678	0.989	1.47259	1.27639	0.836	1.47514	0.0190319	0.033614	Enriched	Rejected
Q9NVM9	integrator complex subunit 13 [OS=Homo sapiens]	1.61295	0.989	1.46313	1.14154	0.801	1.28099	0.0190619	0.0368611	Enriched	Rejected
O75369-8	Isoform 8 of Filamin-B [OS=Homo sapiens]	2.66473	0.988	2.11425	1.31855	0.803	1.6366	0.019092	0.0366506	Enriched	Rejected
P21291	Cysteine and glycine-rich protein 1 [OS=Homo sapiens]	2.40988	0.988	2.16518	8.54875	0.994	3.07732	0.0191221	0.00992183	Enriched	Enriched
P10412	Histone H1.4 [OS=Homo sapiens]	3.24439	0.988	2.29962	1.38475	0.826	1.88506	0.0191521	0.0344859	Enriched	Rejected
P12277	Creatine kinase B-type [OS=Homo sapiens]	3.99338	0.988	3.11836	1.44124	0.704	10.1529	0.0191822	0.0432952	Enriched	Rejected
P56537-1	eukaryotic translation initiation factor 6 [OS=Homo sapiens]	5.12647	0.988	3.44026	3.37782	0.534	4.78617	0.0192123	0.0536981	Enriched	Rejected
P61254	60S ribosomal protein L26 [OS=Homo sapiens]	6.52383	0.988	3.32893	1.07746	0.545	3.54801	0.0192423	0.0531269	Enriched	Rejected
Q8TAT6-2	Isoform 2 of Nuclear protein localization protein 4 homolog [OS=Homo sapiens]	3.55148	0.988	2.91806	0.862158	0.489	5.53071	0.0192724	0.0569453	Enriched	Rejected
Q9NPQ8-3	Isoform 3 of Synembryn-A [OS=Homo sapiens]	2.81442	0.988	2.18083	1.32891	0.631	3.03661	0.0193025	0.047745	Enriched	Rejected
P21796	voltage-dependent anion-selective channel protein 1 [OS=Homo sapiens]	2.63337	0.987	2.04531	2.99212	0.925	3.49251	0.0193325	0.0251052	Enriched	Rejected
Q12931	heat shock protein 75 kDa, mitochondrial [OS=Homo sapiens]	3.35429	0.987	2.69761	1.76735	0.982	1.58693	0.0193626	0.0146422	Enriched	Rejected
P52701	DNA mismatch repair protein MSH6 [OS=Homo sapiens]	3.01559	0.987	1.93693	6.49136	0.998	3.44665	0.0193927	0.00670475	Enriched	Enriched
Q9UQE7	Structural maintenance of chromosomes protein 3 [OS=Homo sapiens]	2.44466	0.987	1.97695	1.90458	0.858	2.4216	0.0194227	0.0321106	Enriched	Rejected
Q9BQA1	Methylosome protein 50 [OS=Homo sapiens]	3.93232	0.987	2.81706	2.52695	0.897	2.96532	0.0194528	0.0286831	Enriched	Rejected
Q13595-1	Transformer-2 protein homolog alpha [OS=Homo sapiens]	1.25679	0.987	1.20453	1.38904	0.963	1.36134	0.0194829	0.0188515	Enriched	Rejected
P49848-3	Isoform 3 of Transcription initiation factor TFIID subunit 6 [OS=Homo sapiens]	11.1273	0.987	3.16401	0.419047	0.089	2.51311	0.0195129	0.0784726	Enriched	Rejected
Q9UHB9	Signal recognition particle subunit SRP68 [OS=Homo sapiens]	2.30048	0.986	1.799	0.498601	0.181	3.26634	0.019543	0.0728803	Enriched	Rejected
P62277	40S ribosomal protein S13 [OS=Homo sapiens]	3.13496	0.986	2.54833	0.636801	0.186	1.94499	0.0195731	0.0724895	Enriched	Rejected
P84098	60S ribosomal protein L19 [OS=Homo sapiens]	3.36729	0.986	2.57474	0.731973	0.274	2.31726	0.0196031	0.0678894	Enriched	Rejected
Q9UNF0	Protein kinase C and casein kinase substrate in neurons protein 2 [OS=Homo sapiens]	5.89906	0.986	3.38265	1.7978	0.868	2.38925	0.0196332	0.0308479	Enriched	Rejected
Q96FQ6	Protein S100-A16 [OS=Homo sapiens]	2.47231	0.986	2.10185	58.0096	1	3.87076	0.0196633	0.00309681	Enriched	Enriched
P10619	lysosomal protective protein [OS=Homo sapiens]	4.52306	0.986	3.14353	2.63657	0.998	1.8619	0.0196933	0.00673482	Enriched	Enriched
P30519	Heme oxygenase 2 [OS=Homo sapiens]	3.183	0.986	2.45526	0.334273	0.013	2.23656	0.0197234	0.0847565	Enriched	Rejected
Q96EY7-1	pentatricopeptide repeat domain-containing protein 3, mitochondrial [OS=Homo sapiens]	3.98221	0.986	3.31658	3.20765	0.993	2.50667	0.0197535	0.0105833	Enriched	Enriched
P38646	Stress-70 protein, mitochondrial [OS=Homo sapiens]	2.48563	0.985	2.14811	6.74882	0.999	3.2561	0.0197835	0.00583283	Enriched	Enriched
P12956	X-ray repair cross-complementing protein 6 [OS=Homo sapiens]	1.78544	0.985	1.57842	1.12552	0.608	2.04259	0.0198136	0.0494287	Enriched	Rejected
P06753-2	Isoform 2 of Tropomyosin alpha-3 chain [OS=Homo sapiens]	9.07024	0.985	7.43133	5.98986	0.996	3.69769	0.0198437	0.00871918	Enriched	Enriched
Q9Y5B9	FACT complex subunit SPT16 [OS=Homo sapiens]	3.12316	0.985	2.87134	1.45193	0.788	2.24156	0.0198737	0.037733	Enriched	Rejected
Q13435	Splicing factor 3b subunit 2 [OS=Homo sapiens]	1.94613	0.985	1.64088	3.87431	0.965	3.66977	0.0199038	0.0184305	Enriched	Rejected
P27694	Replication protein A 70 kDa DNA-binding subunit [OS=Homo sapiens]	2.44604	0.985	2.00126	2.95492	0.989	1.90683	0.0199339	0.0121467	Enriched	Enriched
Q709C8	Vacuolar protein sorting-associated protein 13C [OS=Homo sapiens]	1.86109	0.985	1.61895	1.39448	0.743	2.45424	0.0199639	0.0411606	Enriched	Rejected
O75663	TIP41-like protein [OS=Homo sapiens]	1.59462	0.985	1.43812	1.55244	0.961	1.51439	0.019994	0.0192724	Enriched	Rejected
Q8WYA6	Beta-catenin-like protein 1 [OS=Homo sapiens]	2.31238	0.985	1.8842	2.15284	0.822	3.54968	0.0200241	0.0348467	Enriched	Rejected
P17301	Integrin alpha-2 [OS=Homo sapiens]	2.5906	0.985	2.45525	1.30871	0.749	1.853	0.0200541	0.0408298	Enriched	Rejected
Q96EQ0	Small glutamine-rich tetratricopeptide repeat-containing protein beta [OS=Homo sapiens]	2.55945	0.985	1.92603	0.432688	0.028	2.12791	0.0200842	0.0834636	Enriched	Rejected
P26639-1	Threonine--tRNA ligase, cytoplasmic [OS=Homo sapiens]	2.74357	0.984	2.17985	1.70543	0.942	1.75119	0.0201143	0.0223692	Enriched	Rejected
O43491-1	band 4.1-like protein 2 [OS=Homo sapiens]	2.54075	0.984	2.24731	4.51663	0.994	2.67155	0.0201443	0.00995189	Enriched	Enriched
Q9Y3F4-2	Isoform 2 of Serine-threonine kinase receptor-associated protein [OS=Homo sapiens]	1.53857	0.984	1.37339	3.46011	0.997	2.52966	0.0201744	0.0079074	Enriched	Enriched
P31949	protein S100-A11 [OS=Homo sapiens]	2.2922	0.984	1.77124	2.44115	1	1.64676	0.0202044	0.00312688	Enriched	Enriched
P62249	40S ribosomal protein S16 [OS=Homo sapiens]	3.72322	0.984	3.03265	9.05851	0.999	3.83891	0.0202345	0.0058629	Enriched	Enriched
Q53FA7-1	Quinone oxidoreductase PIG3 [OS=Homo sapiens]	3.26303	0.984	2.24039	3.8913	0.976	3.37296	0.0202646	0.0163259	Enriched	Rejected
Q15102	Platelet-activating factor acetylhydrolase IB subunit gamma [OS=Homo sapiens]	3.30839	0.984	2.61118	3.09331	0.656	4.6986	0.0202946	0.0463319	Enriched	Rejected
Q13813	Spectrin alpha chain, non-erythrocytic 1 [OS=Homo sapiens]	2.25089	0.983	1.73442	9.18674	0.998	3.08625	0.0203247	0.00676488	Enriched	Enriched
P11940-1	Polyadenylate-binding protein 1 [OS=Homo sapiens]	2.5898	0.983	2.039	0.687484	0.354	5.89364	0.0203548	0.064071	Enriched	Rejected
P47897	glutamine--tRNA ligase [OS=Homo sapiens]	2.65972	0.983	2.09041	1.28138	0.724	2.10071	0.0203848	0.0421227	Enriched	Rejected
Q9H0S4	Probable ATP-dependent RNA helicase DDX47 [OS=Homo sapiens]	6.04497	0.983	4.15667	0.402015	0.058	2.52065	0.0204149	0.0809681	Enriched	Rejected
Q9BT78	COP9 signalosome complex subunit 4 [OS=Homo sapiens]	2.45011	0.983	1.94107	0.538724	0.205	2.95987	0.020445	0.0714672	Enriched	Rejected
Q13740-1	CD166 antigen [OS=Homo sapiens]	3.58638	0.983	2.39349	1.27162	0.581	2.85222	0.020475	0.0508419	Enriched	Rejected
O95155-4	Isoform 4 of Ubiquitin conjugation factor E4 B [OS=Homo sapiens]	3.44801	0.983	2.62876	7.94344	0.959	7.70536	0.0205051	0.0198737	Enriched	Rejected
O00291	Huntingtin-interacting protein 1 [OS=Homo sapiens]	4.29408	0.983	2.61871	4.02739	0.926	4.16796	0.0205352	0.024985	Enriched	Rejected
P12270	Nucleoprotein TPR [OS=Homo sapiens]	2.99513	0.982	2.65395	0.0801673	0.143	16.7733	0.0205652	0.0750451	Enriched	Rejected
P17066	Heat shock 70 kDa protein 6 [OS=Homo sapiens]	3.63449	0.982	3.12937	0.972539	0.47	2.17871	0.0205953	0.0582381	Enriched	Rejected
O43865	S-adenosylhomocysteine hydrolase-like protein 1 [OS=Homo sapiens]	2.02885	0.982	1.70189	0.425597	0.209	4.71553	0.0206254	0.0712267	Enriched	Rejected
O43447	peptidyl-prolyl cis-trans isomerase H [OS=Homo sapiens]	1.42864	0.982	1.36704	4.3769	0.976	3.30831	0.0206554	0.016356	Enriched	Rejected
Q8WWY3	U4/U6 small nuclear ribonucleoprotein Prp31 [OS=Homo sapiens]	2.82113	0.982	2.32964	0.539227	0.185	2.87275	0.0206855	0.0725195	Enriched	Rejected
P49757	Protein numb homolog [OS=Homo sapiens]	1.78584	0.982	1.61123	0.420348	0.019	2.1955	0.0207156	0.084095	Enriched	Rejected
P17980	26S proteasome regulatory subunit 6A [OS=Homo sapiens]	1.76296	0.981	1.60148	1.79261	1	1.51182	0.0207456	0.00315695	Enriched	Enriched
Q9UNF1	Melanoma-associated antigen D2 [OS=Homo sapiens]	2.40781	0.981	2.0735	2.58662	0.942	2.73294	0.0207757	0.0223993	Enriched	Rejected
Q96QR8	Transcriptional activator protein Pur-beta [OS=Homo sapiens]	2.97767	0.981	2.54526	4.54875	0.965	4.39366	0.0208058	0.0184606	Enriched	Rejected
Q86UE8	Serine/threonine-protein kinase tousled-like 2 [OS=Homo sapiens]	9.84823	0.981	4.9146	2.35686	0.944	2.39914	0.0208358	0.0220084	Enriched	Rejected
Q9ULC3	Ras-related protein Rab-23 [OS=Homo sapiens]	1.7042	0.981	1.54106	0.314069	0.011	2.42175	0.0208659	0.0850271	Enriched	Rejected
P61604	10 kDa heat shock protein, mitochondrial [OS=Homo sapiens]	5.92373	0.98	4.89764	1.6216	0.864	2.12097	0.020896	0.0313289	Enriched	Rejected
P20962	Parathymosin [OS=Homo sapiens]	2.6107	0.98	2.18008	2.57484	0.982	1.89655	0.020926	0.0146723	Enriched	Rejected
Q8IXB1-1	DnaJ homolog subfamily C member 10 [OS=Homo sapiens]	4.80238	0.98	4.2664	3.07433	0.984	2.43773	0.0209561	0.0142213	Enriched	Rejected
Q92572	AP-3 complex subunit sigma-1 [OS=Homo sapiens]	2.18657	0.98	2.06246	0.874113	0.11	1.19441	0.0209862	0.0769994	Enriched	Rejected
Q9BVC6	Transmembrane protein 109 [OS=Homo sapiens]	7.81782	0.98	5.09275	0.661948	0.278	3.10093	0.0210162	0.0676188	Enriched	Rejected
Q13586	stromal interaction molecule 1 [OS=Homo sapiens]	1.48594	0.98	1.42096	1.04205	0.541	1.47931	0.0210463	0.0533073	Enriched	Rejected
P55060-1	Exportin-2 [OS=Homo sapiens]	4.69633	0.979	3.22102	0.267746	0.49	8.85351	0.0210764	0.0568551	Enriched	Rejected
P16615	Sarcoplasmic/endoplasmic reticulum calcium ATPase 2 [OS=Homo sapiens]	1.80884	0.979	1.59564	0.647777	0.288	3.38156	0.0211064	0.0671377	Enriched	Rejected
Q9NUQ9	protein FAM49B [OS=Homo sapiens]	4.94261	0.979	4.52653	0.565718	0.493	8.45692	0.0211365	0.0566146	Enriched	Rejected
O75367-1	Core histone macro-H2A.1 [OS=Homo sapiens]	2.5335	0.979	1.95464	21.3627	0.999	5.86779	0.0211666	0.00589296	Enriched	Enriched
P61163	Alpha-centractin [OS=Homo sapiens]	2.11599	0.979	1.9242	1.70543	0.789	2.77657	0.0211966	0.0376729	Enriched	Rejected
Q9UBE0-1	SUMO-activating enzyme subunit 1 [OS=Homo sapiens]	3.12122	0.979	2.59454	2.94596	0.873	3.92375	0.0212267	0.0306975	Enriched	Rejected
P36915-1	Guanine nucleotide-binding protein-like 1 [OS=Homo sapiens]	8.27613	0.979	7.9061	0.573337	0.204	2.22238	0.0212568	0.0715574	Enriched	Rejected
O75381-1	Peroxisomal membrane protein PEX14 [OS=Homo sapiens]	1.99602	0.979	1.80767	1.98175	0.93	2.02191	0.0212868	0.0242333	Enriched	Rejected
P42785-2	Isoform 2 of Lysosomal Pro-X carboxypeptidase [OS=Homo sapiens]	4.38128	0.979	4.25261	8.34792	0.998	5.58755	0.0213169	0.00679495	Enriched	Enriched
Q5T653	39S ribosomal protein L2, mitochondrial [OS=Homo sapiens]	2.77683	0.979	2.27608	3.36521	0.991	2.91965	0.021347	0.0114853	Enriched	Enriched
Q9BUF5	Tubulin beta-6 chain [OS=Homo sapiens]	2.07718	0.978	1.77458	2.84782	0.689	11.059	0.021377	0.0442574	Rejected	Rejected
P19367-3	Isoform 3 of Hexokinase-1 [OS=Homo sapiens]	2.48133	0.978	2.10357	2.54551	0.886	2.8386	0.0214071	0.0296452	Rejected	Rejected
P62424	60S ribosomal protein L7a [OS=Homo sapiens]	2.78882	0.978	2.3455	2.07184	0.883	2.91173	0.0214372	0.0299158	Rejected	Rejected
Q6NZI2-1	caveolae-associated protein 1 [OS=Homo sapiens]	1.65073	0.978	1.55913	1.04275	0.549	6.09224	0.0214672	0.0529164	Rejected	Rejected
O14818-1	Proteasome subunit alpha type-7 [OS=Homo sapiens]	3.28904	0.978	2.47397	1.59113	0.828	2.45235	0.0214973	0.0343355	Rejected	Rejected
P26373-1	60S ribosomal protein L13 [OS=Homo sapiens]	2.1229	0.978	1.88917	2.17786	0.992	1.72803	0.0215274	0.0110944	Rejected	Enriched
O43818	U3 small nucleolar RNA-interacting protein 2 [OS=Homo sapiens]	6.50414	0.978	3.89289	0.476374	0.478	5.8722	0.0215574	0.0576669	Rejected	Rejected
P61353	60S ribosomal protein L27 [OS=Homo sapiens]	2.98852	0.978	2.43483	1.51613	0.843	1.94466	0.0215875	0.0331028	Rejected	Rejected
O96008	Mitochondrial import receptor subunit TOM40 homolog [OS=Homo sapiens]	3.73962	0.978	3.36546	1.66727	0.815	2.48608	0.0216176	0.0353879	Rejected	Rejected
P82979	SAP domain-containing ribonucleoprotein [OS=Homo sapiens]	2.5723	0.978	2.17167	1.77616	0.852	1.914	0.0216476	0.0326218	Rejected	Rejected
Q9Y3Y2-3	Isoform 2 of Chromatin target of PRMT1 protein [OS=Homo sapiens]	2.2851	0.978	1.94697	3.63819	0.997	2.40915	0.0216777	0.00793746	Rejected	Enriched
Q9BQE5	apolipoprotein L2 [OS=Homo sapiens]	2.58221	0.978	2.12937	1.29554	0.698	2.96735	0.0217078	0.0439266	Rejected	Rejected
Q9Y314	nitric oxide synthase-interacting protein [OS=Homo sapiens]	2.17297	0.978	1.9149	22.1774	0.996	5.78439	0.0217378	0.00874925	Rejected	Enriched
Q9BTU6	Phosphatidylinositol 4-kinase type 2-alpha [OS=Homo sapiens]	1.99139	0.978	1.87032	1.56654	0.776	2.69427	0.0217679	0.0386651	Rejected	Rejected
Q9NS25	Sperm protein associated with the nucleus on the X chromosome B1 [OS=Homo sapiens]	1.54201	0.978	1.42491	0.861003	0.307	1.63325	0.021798	0.0662357	Rejected	Rejected
Q99720	sigma non-opioid intracellular receptor 1 [OS=Homo sapiens]	2.36631	0.978	1.90018	8.2861	0.989	3.17711	0.021828	0.0121768	Rejected	Enriched
Q96QK1	Vacuolar protein sorting-associated protein 35 [OS=Homo sapiens]	4.36397	0.977	3.73461	3.77149	0.981	3.16839	0.0218581	0.015003	Rejected	Rejected
O75390	citrate synthase, mitochondrial [OS=Homo sapiens]	6.99169	0.977	5.86134	12.461	0.998	6.00565	0.0218882	0.00682502	Rejected	Enriched
P62820	Ras-related protein Rab-1A [OS=Homo sapiens]	2.94828	0.977	2.39285	1.6463	0.862	2.1758	0.0219182	0.0316296	Rejected	Rejected
P56181-2	Isoform 2 of NADH dehydrogenase [ubiquinone] flavoprotein 3, mitochondrial [OS=Homo sapiens]	3.50086	0.977	2.88186	3.87788	0.979	2.96204	0.0219483	0.0157847	Rejected	Rejected
Q8WUF5	RelA-associated inhibitor [OS=Homo sapiens]	4.90488	0.977	3.74849	1.20314	0.823	1.35674	0.0219784	0.0346963	Rejected	Rejected
Q15370-2	Isoform 2 of Elongin-B [OS=Homo sapiens]	2.51099	0.977	1.9104	0.427323	0.18	2.79251	0.0220084	0.0730307	Rejected	Rejected
Q9NWS8	Required for meiotic nuclear division protein 1 homolog [OS=Homo sapiens]	1.27322	0.977	1.2372	1.11872	0.767	1.27953	0.0220385	0.0394167	Rejected	Rejected
Q86U44	N6-adenosine-methyltransferase 70 kDa subunit [OS=Homo sapiens]	3.78049	0.977	3.39349	0.881137	0.421	2.37671	0.0220686	0.0608539	Rejected	Rejected
P51970	NADH dehydrogenase [ubiquinone] 1 alpha subcomplex subunit 8 [OS=Homo sapiens]	3.09594	0.977	2.70678	3.2351	0.993	2.19633	0.0220986	0.0106133	Rejected	Enriched
P04792	Heat shock protein beta-1 [OS=Homo sapiens]	2.06386	0.976	1.72438	1.96595	0.992	1.57341	0.0221287	0.0111245	Rejected	Enriched
P22570-7	Isoform 7 of NADPH:adrenodoxin oxidoreductase, mitochondrial [OS=Homo sapiens]	2.01949	0.976	1.79478	1.07308	0.551	2.26826	0.0221587	0.052736	Rejected	Rejected
Q99733-2	Isoform 2 of Nucleosome assembly protein 1-like 4 [OS=Homo sapiens]	2.2902	0.976	1.80952	2.76015	0.996	2.18147	0.0221888	0.00877931	Rejected	Enriched
Q9BRP8	Partner of Y14 and mago [OS=Homo sapiens]	2.08916	0.976	1.92444	2.80429	0.92	3.07055	0.0222189	0.0261575	Rejected	Rejected
Q5T1M5	FK506-binding protein 15 [OS=Homo sapiens]	1.40171	0.976	1.35015	1.36252	0.952	1.35705	0.0222489	0.0210764	Rejected	Rejected
Q9NPD3	Exosome complex component Rrp41 [OS=Homo sapiens]	2.4789	0.976	2.34243	10.1327	0.998	4.79374	0.022279	0.00685508	Rejected	Enriched
Q13206	probable ATP-dependent RNA helicase DDX10 [OS=Homo sapiens]	1.86334	0.976	1.74779	2.58106	0.809	2.93903	0.0223091	0.0360493	Rejected	Rejected
P08962	CD63 antigen [OS=Homo sapiens]	2.60174	0.976	2.06997	2.97276	0.995	2.12132	0.0223391	0.0094107	Rejected	Enriched
Q9UNZ2-5	Isoform 3 of NSFL1 cofactor p47 [OS=Homo sapiens]	2.48581	0.975	2.21668	6.53997	0.987	3.26291	0.0223692	0.0129585	Rejected	Rejected
O14979-1	Heterogeneous nuclear ribonucleoprotein D-like [OS=Homo sapiens]	2.79103	0.975	2.43113	0.392048	0.071	2.70985	0.0223993	0.0797956	Rejected	Rejected
P62269	40S ribosomal protein S18 [OS=Homo sapiens]	2.48066	0.975	2.22515	5.15	0.92	5.9462	0.0224293	0.0261876	Rejected	Rejected
O75718	Cartilage-associated protein [OS=Homo sapiens]	7.95197	0.975	5.91574	0.435669	0.198	2.63601	0.0224594	0.0720084	Rejected	Rejected
Q96RP9	Elongation factor G, mitochondrial [OS=Homo sapiens]	3.10038	0.975	2.74794	1.00638	0.527	2.51405	0.0224895	0.0542093	Rejected	Rejected
Q9H1B7	interferon regulatory factor 2-binding protein-like [OS=Homo sapiens]	3.8598	0.975	3.07561	1.22229	0.7	1.72746	0.0225195	0.0437462	Rejected	Rejected
P62195-1	26S proteasome regulatory subunit 8 [OS=Homo sapiens]	2.36923	0.974	2.07289	0.988956	0.501	7.02259	0.0225496	0.055923	Rejected	Rejected
P49792	E3 SUMO-protein ligase RanBP2 [OS=Homo sapiens]	1.88579	0.974	1.69143	7.27654	0.999	2.86084	0.0225797	0.00592303	Rejected	Enriched
P53007	Tricarboxylate transport protein, mitochondrial [OS=Homo sapiens]	2.46752	0.974	2.06185	0.784732	0.314	2.43342	0.0226097	0.0658148	Rejected	Rejected
Q9Y237-2	Isoform 2 of Peptidyl-prolyl cis-trans isomerase NIMA-interacting 4 [OS=Homo sapiens]	9.88786	0.974	8.78828	1.57613	0.694	2.38879	0.0226398	0.0441371	Rejected	Rejected
P11413-2	Isoform Long of Glucose-6-phosphate 1-dehydrogenase [OS=Homo sapiens]	1.47909	0.973	1.42202	5.23403	0.957	5.09068	0.0226699	0.0202646	Rejected	Rejected
Q02952-1	A-kinase anchor protein 12 [OS=Homo sapiens]	2.04343	0.973	1.87892	4.27875	0.999	2.4674	0.0226999	0.0059531	Rejected	Enriched
Q92973-1	transportin-1 [OS=Homo sapiens]	2.72309	0.973	2.36361	0.330411	0.217	4.36676	0.02273	0.0707757	Rejected	Rejected
Q13596	Sorting nexin-1 [OS=Homo sapiens]	2.64439	0.973	2.43902	1.97346	0.943	2.04214	0.0227601	0.0221287	Rejected	Rejected
Q9UDY2-7	Isoform 7 of Tight junction protein ZO-2 [OS=Homo sapiens]	1.74945	0.973	1.62057	1.05219	0.589	1.45597	0.0227901	0.0503909	Rejected	Rejected
P27105	erythrocyte band 7 integral membrane protein [OS=Homo sapiens]	2.62036	0.973	2.22643	1.13604	0.651	3.5619	0.0228202	0.0467829	Rejected	Rejected
P35268	60S ribosomal protein L22 [OS=Homo sapiens]	2.02924	0.973	1.89349	16.8349	0.978	13.8335	0.0228503	0.0160553	Rejected	Rejected
Q6DKI1	60S ribosomal protein L7-like 1 [OS=Homo sapiens]	2.08963	0.973	2.00729	1.13917	0.718	1.43685	0.0228803	0.0425436	Rejected	Rejected
Q9BV38	WD repeat-containing protein 18 [OS=Homo sapiens]	2.34962	0.973	2.14251	3.97227	0.826	8.61881	0.0229104	0.0345159	Rejected	Rejected
P54725-1	UV excision repair protein RAD23 homolog A [OS=Homo sapiens]	5.88927	0.973	2.62531	10.7278	1	2.4719	0.0229405	0.00318701	Rejected	Enriched
P15408-1	Fos-related antigen 2 [OS=Homo sapiens]	5.94593	0.973	5.2826	0.568257	0.422	3.2552	0.0229705	0.0608238	Rejected	Rejected
Q8WX92	Negative elongation factor B [OS=Homo sapiens]	1.28704	0.973	1.2507	1.04871	0.629	1.39038	0.0230006	0.0479254	Rejected	Rejected
O43159	ribosomal rna-processing protein 8 [OS=Homo sapiens]	1.46487	0.973	1.38731	1.28397	0.846	1.44082	0.0230307	0.0329224	Rejected	Rejected
P52209	6-phosphogluconate dehydrogenase, decarboxylating [OS=Homo sapiens]	2.82518	0.972	2.58764	6.73217	0.99	3.98538	0.0230607	0.0118461	Rejected	Enriched
P54136-1	arginine--tRNA ligase, cytoplasmic [OS=Homo sapiens]	1.82941	0.972	1.65822	0.345395	0.034	2.68276	0.0230908	0.0830126	Rejected	Rejected
Q7L2E3-2	Isoform 2 of Putative ATP-dependent RNA helicase DHX30 [OS=Homo sapiens]	39.0555	0.972	28.3099	0.77802	0.321	2.27635	0.0231209	0.0653939	Rejected	Rejected
Q9UJ70-2	Isoform 2 of N-acetyl-D-glucosamine kinase [OS=Homo sapiens]	6.33536	0.972	5.35849	2.51956	0.788	4.65414	0.0231509	0.0377631	Rejected	Rejected
P14868	Aspartate--tRNA ligase, cytoplasmic [OS=Homo sapiens]	1.66712	0.971	1.59579	11.0001	0.999	4.99968	0.023181	0.00598316	Rejected	Enriched
Q00341-1	Vigilin [OS=Homo sapiens]	2.76438	0.971	2.10621	0.0651174	0.084	21.0799	0.0232111	0.0788635	Rejected	Rejected
P28070	Proteasome subunit beta type-4 [OS=Homo sapiens]	2.81053	0.971	2.48306	0.72601	0.247	2.19298	0.0232411	0.0692423	Rejected	Rejected
P50213-1	Isocitrate dehydrogenase [NAD] subunit alpha, mitochondrial [OS=Homo sapiens]	36.6826	0.971	35.3316	2.88757	0.936	3.02411	0.0232712	0.0233915	Rejected	Rejected
P01023	alpha-2-macroglobulin [OS=Homo sapiens]	1.46392	0.971	1.38327	9.06877	1	3.6726	0.0233013	0.00321708	Rejected	Enriched
Q9Y3C6	Peptidyl-prolyl cis-trans isomerase-like 1 [OS=Homo sapiens]	4.40998	0.971	3.16712	2.47656	0.95	2.47432	0.0233313	0.021377	Rejected	Rejected
Q9NVS9	Pyridoxine-5'-phosphate oxidase [OS=Homo sapiens]	3.57583	0.97	2.61913	0.792953	0.396	2.55765	0.0233614	0.0621768	Rejected	Rejected
P42765	3-ketoacyl-CoA thiolase, mitochondrial [OS=Homo sapiens]	1.97978	0.97	1.86362	1.59298	0.675	2.73964	0.0233915	0.0451293	Rejected	Rejected
Q13242	serine/arginine-rich splicing factor 9 [OS=Homo sapiens]	3.86686	0.97	3.6679	5.38993	0.985	4.48974	0.0234215	0.0137402	Rejected	Rejected
Q9Y3U8	60S ribosomal protein L36 [OS=Homo sapiens]	2.33923	0.97	2.06818	7.9872	0.902	9.06641	0.0234516	0.0280818	Rejected	Rejected
Q9NXV6	CDKN2A-interacting protein [OS=Homo sapiens]	1.75416	0.97	1.63926	0.833564	0.184	1.41829	0.0234817	0.0725797	Rejected	Rejected
Q9BZD4	kinetochore protein nuf2 [OS=Homo sapiens]	7.13951	0.97	6.79566	5.21596	0.613	20.7979	0.0235117	0.0491882	Rejected	Rejected
P63010-2	Isoform 2 of AP-2 complex subunit beta [OS=Homo sapiens]	2.12236	0.969	1.95108	0.436418	0.086	2.81446	0.0235418	0.0786831	Rejected	Rejected
Q9UJZ1	Stomatin-like protein 2, mitochondrial [OS=Homo sapiens]	3.84355	0.969	3.22736	4.12638	0.865	5.28596	0.0235719	0.0312989	Rejected	Rejected
Q9UKK9	ADP-sugar pyrophosphatase [OS=Homo sapiens]	1.67796	0.969	1.57851	1.01676	0.534	1.578	0.0236019	0.0537282	Rejected	Rejected
Q92552-2	Isoform 2 of 28S ribosomal protein S27, mitochondrial [OS=Homo sapiens]	2.6421	0.969	2.48754	3.18492	0.963	2.93737	0.023632	0.0188815	Rejected	Rejected
Q7L014	probable ATP-dependent RNA helicase DDX46 [OS=Homo sapiens]	3.3288	0.969	2.79341	0.597976	0.107	2.46747	0.0236621	0.0770896	Rejected	Rejected
Q10471	Polypeptide N-acetylgalactosaminyltransferase 2 [OS=Homo sapiens]	2.72251	0.969	2.49074	1.66706	0.673	3.93753	0.0236921	0.0452495	Rejected	Rejected
Q9P121-4	Isoform 4 of Neurotrimin [OS=Homo sapiens]	386.216	0.969	61.0589	1.14207	0.745	1.41464	0.0237222	0.0410102	Rejected	Rejected
[truncated: 2,077 more rows]

## Sheet: HSP70 - SOD1 (A4V) Low
Uniprot Accession	Description	Untreated Enrichment Score	Untreated Percentile	Untreated 95%	Treated Enrichment Score	Treated Percentile	Treated 95%	Untreated B-H Corrected Q 0.05	Treated B-H Corrected Q 0.05	Untreated Enrichment	Treated Enrichment
[truncated: 3,008 more rows]

[truncated: 1 more sheets: HSC70 - SOD1 (A4V) Low]
