# Supplementary material for: Proteome-wide identification of HSP70/HSC70 chaperone clients in human cells
Source: PLoS Biol. 2020 Jul 20;18(7):e3000606. doi: 10.1371/journal.pbio.3000606 (PMC7392334; doi:10.1371/journal.pbio.3000606)
Supplement: S6 Data — (XLSX) [file pbio.3000606.s013.xlsx]

## Sheet: Fig. 2F
In this SILAC experiment, the theoretical light/heavy values for each protein were calculated from measurements in the total lysate at day 1 and separately at day 2 (S4 Data, "theoretical"). These yield a theoretical light/heavy value for each protein. The experimental values come from the HSP70 or HSC70 IP data, where light/heavy ratios are measured for each protein identified in the IP (each me…
	HSP70
		positive values (older)	negative values (younger)
	day 1	15	46
	day 2	10	67
	total	25	113
	%	0.181159	0.818841
	HSC70
		positive values (older)	negative values (younger)
	day 1	86	182
	day 2	70	197
	total	156	379
	%	0.291589	0.708411

## Sheet: Fig. 3A
	HSP70
	untreated	wt	ΔGG
		9934.59	63793.6
		45210.6	38926.6
		58830.6	65429.6
		829987	44050.6
		28301.6	13214
		57977.6	24626.6
	plus shMre11	295529	50385.6
		37566.3	34364.6
		106533	65475.6
		45760.6	347402
		56032.6	25892.6
		46321.6	13680.6
	HSC70
	untreated	wt	ΔGG
		985311	272656
		51772.2	429021
		1.43408e+06	324199
		395851	19287.7
		34030.2	32792.2
		37973.2	24288.2
	plus shMre11	710401	121839
		819490	109715
		19812.2	185291
		3.76101e+06	94576.7
		49449.2	40059.2
		3.97031e+06	199340

## Sheet: Fig. 3B
	HSP70
	untreated	wt	ΔGG
		1.72002e+07	1.58901e+07
		3.17963e+07	5.46991e+06
		4.7155e+07	2.87531e+07
		6.28393e+07	1.27988e+07
		7.44143e+07	4.79873e+06
		6.0525e+07
	plus ATP1B1	2.56982e+07	5.05037e+06
		2.60577e+07	8.38787e+06
		2.88946e+07	5.42548e+06
		3.63577e+07	4.78022e+06
		2.73874e+07	4.70969e+06
		4.80391e+07	993740
	HSC70
	untreated	wt	ΔGG
		6.05191e+06	2.01737e+06
		1.71224e+07	2.28468e+06
		5.88079e+06	941056
		6.56761e+06	2.42698e+06
		2.4658e+07	2.98326e+06
		1.77728e+07
	plus ATP1B1	3.3356e+07	2.57647e+06
		1.09409e+07	8.72941e+06
		1.24485e+07	1.13602e+06
		9.99276e+06	746910
		9.56454e+06	862773
		8.302e+06

## Sheet: Fig. 3C
	HSP70
	untreated	wt	ΔGG
		730320	634935
		476495	415838
		938612	131996
		583940	308517
		1.07489e+06	256917
		538252	83007
	plus MSH2	532901	86226.6
		679514	145719
		155129	328029
		271039	295589
		335752	233721
		367384	122539
	HSC70
	untreated	wt	ΔGG
		143400	125877
		132427	196210
		95889.1	73418.6
		335776	141759
		250686	119841
			57711.3
	plus MSH2	124996	351716
		252192	284374
		714473	84797.9
		493688	267533
		58516.2	318447

## Sheet: Fig. 4A
	HSP70	wt	ΔGG
	untreated	93218	435430
		819558	706088
		2.62556e+06	474998
		117765	420198
			56080
			720829
	plus SOD1 (high)	6.1685e+07	3.74076e+06
		212062820	4.48532e+06
		1.88824e+08	3.05415e+06
		8.28051e+07	3.74512e+06
		7.91747e+07	4.43202e+06
		1.01956e+08	1.0155e+07
	HSC70	wt	ΔGG
	untreated	3.79409e+06	1.02152e+06
		1.48496e+06	776293
		133250	550016
		977251	346359
		1.12986e+06	897855
		289380	410739
	plus SOD1 (high)	101144441	5.90173e+06
		8.4785e+07	1.07674e+07
		9.28228e+07	3.94026e+06
		1.10935e+08	5.90601e+06
		6.60734e+07	1.27797e+06
		7.5871e+07	4.89264e+06

## Sheet: Fig. 4E
	HSP70	wt	ΔGG
	untreated	3.79356e+06	4.25173e+06
		3.23742e+06	3.02023e+06
		4.00437e+06	1.68198e+06
		3.54508e+06	1.98595e+06
		3.86593e+06	1.82172e+06
		3.91306e+06	1.55824e+06
	plus SOD1 (low)	7.45613e+06	3.49331e+06
		6.83558e+06	2.6623e+06
		6.50837e+06	1.4203e+06
		6.17062e+06	2.06219e+06
		6.62842e+06	2.55501e+06
		5.2563e+06	1.71869e+06
	HSC70	wt	ΔGG
	untreated	6.02818e+06	2.2038e+06
		4.52504e+06	1.39912e+06
		5.59068e+06	1.41212e+06
		3.95192e+06	2.26427e+06
		4.748e+06	2.52573e+06
		3.31391e+06	2.10856e+06
	plus SOD1 (low)	8.13432e+06	1.55135e+06
		8.18808e+06	2.32928e+06
		6.50771e+06	1.67719e+06
		7.59701e+06	1.6464e+06
		5.90399e+06	1.87059e+06
		8.13217e+06	1.75928e+06

## Sheet: Fig. S3A
NUP93
	HSC70	Expt 1		Expt 2		Expt 3
		wt	ΔGG	wt	ΔGG	wt	ΔGG
		1.24132e+07	988438	3.58589e+07	619882	3.43528e+06	461016
		3.99023e+07	319369	3.85575e+07	20807.6	1.64192e+07	380748
		1.4932e+07	540313	7.76944e+07	89911.4	1.72107e+07	318203
		8.80099e+06	94446.4	2.911e+07	950736	2.27747e+07	644871
		1.957e+07	1.29464e+06	2.54498e+07	2.57897e+06	2.78601e+07	594917
		2.53672e+07	30055.6	3.84969e+07	2.27979e+06	1.76989e+07	439890
		1.90348e+07	656778	2.98174e+07	463289	2.47054e+07	548389
		2.84743e+07	720034	2.01734e+07	1.73259e+06	1.85204e+07	609919
		2.06729e+07	452900	2.57157e+07	942009	1.92489e+07	498779
		1.61855e+07	437899	2.38381e+07	713655	3.07745e+07	216189
		7.48783e+06	223317	2.18952e+07	1.76304e+06	2.52647e+07	37130.6
		3.27256e+07	294468	3.20655e+07	1.86218e+06	1.93737e+07	362848

## Sheet: Fig. S3B
ARID1A
	HSC70	Expt 1		Expt 2		Expt 3
		wt	ΔGG	wt	ΔGG	wt	ΔGG
		2.33182e+07	7.28877e+06	2.03822e+06	2.10613e+06	1.03077e+07	6.052e+06
		1.68023e+07	8.54114e+06	1.75007e+07	1.05722e+06	1.39487e+07	1.65447e+06
		1.23155e+07	2.70327e+06	4.69519e+07	61818.1	2.08586e+07	4.71567e+06
		1.10408e+07	1.19644e+06	1.15014e+07	8.59825e+06	1.57742e+07	5.7415e+06
		976328	5.28732e+06	5.5456e+06	4.19752e+06	927975	5.50592e+06
		2.25476e+07	1.41178e+06	1.61747e+07	6.16395e+06	2.08744e+07	3.94096e+06
		2.74934e+07	1.03073e+06	1.23383e+07	5.44114e+06	1.43817e+07	2.09377e+06
		1.8333e+07	6.09419e+06	1.13716e+07	1.18703e+07	1.59611e+07	4.25554e+06
		1.97854e+07	1.63082e+06	1.33007e+07	4.92954e+06	368240	2.17368e+06
		2.01066e+07	7.34979e+06	7.9269e+06	8.49341e+06	2.20641e+07	1.67698e+06
		8.77617e+06	1.532e+06	5.13678e+06	7.73341e+06	2.44769e+07	3.15317e+06
		202104	1.91538e+06	1.60498e+07	1.83993e+06	2.31991e+07	1.52873e+06

## Sheet: Fig. S3C
ZNF185
	HSC70	Expt 1		Expt 2		Expt 3
		wt	ΔGG	wt	ΔGG	wt	ΔGG
		1.71055e+06	793097	1.05734e+07	946212	2.94944e+06	356586
		2.42629e+06	64284.9	7.20206e+06	173276	1.48322e+07	31881.2
		4.78329e+06	28868.6	2.50804e+07	106489	2.23972e+07	263215
		3.82928e+06	34664.6	8.13547e+06	300021	4.25057e+06	1.49023e+06
		1.19515e+07	18892.6	6.98173e+06	302279	4.93902e+06	36687.9
		3.2399e+06	36064.6	8.36913e+06	419973	2.66908e+06	62678.8
		3.47477e+06	103325	7.78173e+06	1.18019e+06	3.81805e+06	105596
		3.37817e+06	35853.6	7.72641e+06	3.79345e+06	2.55433e+06	56224.4
		2.51433e+06	17848.6	8.68227e+06	84118.4	3.21431e+06	26369.6
		1.00855e+07	124282	8.13647e+06	159352	5.34624e+06	114779
		9.2589e+06	367836	7.35747e+06	54695.9	3.57913e+06	82673.3
		1.21137e+07	10169.6	6.50031e+06	30759.6	8.54671e+06	38510.1

## Sheet: Fig. S3D
ATP1A1
	HSP70	Expt 1		Expt 2		Expt 3
		wt	ΔGG	wt	ΔGG	wt	ΔGG
		1.40743e+07	4.48026e+06	1.16337e+07	3.26768e+06	1.18584e+07	3.12993e+06
		1.13797e+07	900331	14508993	2.4745e+06	1.35634e+07	3.54291e+06
		1.34304e+07	4.28553e+06	9.25404e+06	2.81041e+06	1.02325e+07	2.89019e+06
		1.20622e+07	1.54028e+06	8.34216e+06	5.85001e+06	1.08504e+07	1.56861e+06
		1.33779e+07	1.3695e+06	1.15976e+07	2.74112e+06	1.37251e+07	2.75884e+06
		8.87193e+06	1.04654e+06	1.15215e+07	3.57772e+06	9.71971e+06	2.04809e+06
		9.94142e+06	935409	1.29779e+07	4.01534e+06	1.39967e+07	2.73927e+06
		1.40215e+07	510691	1.20675e+07	5.06116e+06	2.51746e+07	2.19257e+06
		9.22896e+06	1.93366e+06	1.29905e+07	5.11969e+06	1.68696e+07	3.06075e+06
		7.47255e+06	2.44184e+06	1.41315e+07	2.37086e+06	1.54284e+07	2.19868e+06
		9.47094e+06	1.62354e+06	1.18793e+07	2.65659e+06	1.05522e+07	2.02171e+06
		1.48561e+07	2.41664e+06	1.34717e+07	1.91573e+06	1.22544e+07	2.44461e+06

[truncated: 6 more sheets: Fig. S3E, Fig. S3F, Fig. S5, Fig. S7D, Fig. S7E, Fig. S7F]
